# Supplementary material for: Bottom-up and top-down influences at untrained conditions determine perceptual learning specificity and transfer
Source: eLife. 2016 Jul 5;5:e14614. doi: 10.7554/eLife.14614 (PMC4965262; doi:10.7554/eLife.14614)
Supplement: Figure 1—source data 1. — The other data sheets contain raw staircase data for 1a, 1d, 1e, and 1f. DOI: http://dx.doi.org/10.7554/eLife.14614.004 [file elife-14614-fig1-data1.xlsx]

## Sheet: Summary_Fig1
Figure 1a
Average(N = 10)
Session	Trained	error	Orthogonal	error
day1	4.17476	0.291845	4.2345	0.410466
day2	3.23914	0.250508
day3	3.08925	0.222342
day4	3.12712	0.265094
day5	2.92473	0.272533
day6	2.53611	0.165803
day7	2.41144	0.231976	3.65344	0.32203
IMP	0.428934	0.0340246	0.118076	0.0461247
TI			0.255222	0.102715
Individuals
SUB1	Trained	error	Orthogonal	error		SUB2	Trained	error	Orthogonal	error		SUB3	Trained	error	Orthogonal	error
day1	3.47066	0.496017	4.35207	0.356252		day1	5.52633	0.428463	5.67066	0.55476		day1	5.22623	0.450599	6.24805	0.337746
day2	2.31469	0.227533				day2	4.64232	0.253448				day2	3.55385	0.236168
day3	2.4339	0.128393				day3	4.85582	0.260044				day3	3.07895	0.191521
day4	2.20794	0.144695				day4	4.95445	0.28738				day4	2.71035	0.120399
day5	1.70229	0.119571				day5	3.83728	0.212252				day5	3.75385	0.14913
day6	2.06762	0.221228				day6	3.35806	0.12934				day6	2.39231	0.169515
day7	1.63974	0.252681	3.12058	0.323871		day7	2.99599	0.304943	5.0627	0.505156		day7	2.78639	0.342129	4.74339	0.382042
IMP	0.527542		0.282966			IMP	0.45787		0.107212			IMP	0.466846		0.240822
TI			0.536386			TI			0.234154			TI			0.515848
SUB4	Trained	error	Orthogonal	error		SUB5	Trained	error	Orthogonal	error		SUB6	Trained	error	Orthogonal	error
day1	4.25438	0.267896	5.26906	0.460037		day1	4.61553	0.739148	4.08179	0.579922		day1	2.57586	0.288949	2.14492	0.440311
day2	3.48685	0.168284				day2	3.88025	0.254659				day2	1.87654	0.236117
day3	3.38714	0.315893				day3	3.2401	0.240714				day3	2.32715	0.243548
day4	3.37141	0.162629				day4	3.61048	0.195211				day4	2.15646	0.180774
day5	2.88201	0.133979				day5	3.20708	0.227534				day5	1.66779	0.162499
day6	2.86995	0.151311				day6	2.91287	0.16521				day6	1.46946	0.120231
day7	2.68059	0.346355	4.2421	0.28036		day7	2.46019	0.183727	2.73564	0.273503		day7	1.09575	0.137205	2.33441	0.221358
IMP	0.369924		0.194905			IMP	0.466976		0.329792			IMP	0.574608		-0.0883415
TI			0.526878			TI			0.70623			TI			-0.153742
SUB7	Trained	error	Orthogonal	error		SUB8	Trained	error	Orthogonal	error		SUB9	Trained	error	Orthogonal	error
day1	3.00453	0.170063	2.56057	0.425767		day1	4.42412	0.466389	4.61198	0.195425		day1	4.36788	0.384224	3.52547	0.432143
day2	2.82325	0.233536				day2	3.32824	0.226313				day2	2.91456	0.159758
day3	2.82733	0.254694				day3	2.75587	0.200188				day3	3.05772	0.179556
day4	2.78251	0.287513				day4	2.93326	0.230634				day4	2.75591	0.145229
day5	2.20321	0.201623				day5	3.84332	0.516224				day5	2.52797	0.334399
day6	2.25302	0.18276				day6	2.58516	0.112479				day6	2.64788	0.17386
day7	1.67885	0.0553924	2.18208	0.114494		day7	3.13802	0.31428	4.4241	0.60638		day7	2.28938	0.222656	3.60526	0.352043
IMP	0.441226		0.147816			IMP	0.290702		0.0407378			IMP	0.475861		-0.022632
TI			0.335012			TI			0.140136			TI			-0.0475601
SUB10	Trained	error	Orthogonal	error
day1	4.28213	0.529036	3.88038	0.424574
day2	3.57084	0.244824
day3	2.92855	0.201126
day4	3.78846	0.324815
day5	3.6225	0.126336
day6	2.80481	0.198279
day7	3.34952	0.214396	4.08416	0.49412
IMP	0.217791		-0.052515
TI			-0.241126
Figure 1d
Average(N = 10)
Session	Trained	error	Orthogonal	error
day1	4.46844	0.351936	4.40548	0.465976
day2	3.6654	0.397183
day3	3.21591	0.34653
day4	2.9558	0.382163
day5	2.63352	0.306082
day6	2.59044	0.339808
day7	2.30065	0.299688	2.89307	0.328036
IMP	0.481834	0.0543264	0.337014	0.0459888
TI			0.719858	0.0792081
Individuals
SUB1	Trained	error	Orthogonal	error		SUB2	Trained	error	Orthogonal	error		SUB3	Trained	error	Orthogonal	error
day1	4.82135	0.51446	3.51658	0.356252		day1	5.80759	0.493798	6.73898	0.488075		day1	3.10666	0.18853	3.41257	0.384685
day2	3.57176	0.272205				day2	4.25757	0.456845				day2	2.82224	0.202887
day3	3.01572	0.256993				day3	3.96747	0.265252				day3	1.93103	0.176153
day4	2.21168	0.21849				day4	3.69584	0.236702				day4	2.54352	0.270448
day5	1.40221	0.096907				day5	2.99059	0.273673				day5	2.23201	0.209021
day6	1.37546	0.203404				day6	3.33676	0.186265				day6	2.3649	0.175241
day7	1.05058	0.252681	1.52397	0.267731		day7	2.5757	0.257791	3.64826	0.342281		day7	2.09246	0.221685	2.36627	0.183715
IMP	0.782098		0.566633			IMP	0.556493		0.458634			IMP	0.326461		0.306602
TI			0.724504			TI			0.824149			TI			0.939169
SUB4	Trained	error	Orthogonal	error		SUB5	Trained	error	Orthogonal	error		SUB6	Trained	error	Orthogonal	error
day1	4.50138	0.490425	3.89726	0.49189		day1	4.39026	0.334051	4.67604	0.424267		day1	2.98118	0.372883	3.26751	0.227397
day2	4.54325	0.231288				day2	4.35052	0.164165				day2	2.78435	0.198244
day3	3.56915	0.196802				day3	3.20366	0.180126				day3	2.46824	0.320781
day4	2.93303	0.166924				day4	3.21064	0.218892				day4	2.38407	0.183926
day5	3.24289	0.297257				day5	3.57982	0.288664				day5	2.50816	0.234953
day6	3.29016	0.289575				day6	3.28584	0.255616				day6	1.84282	0.112569
day7	2.91604	0.264401	3.08619	0.679261		day7	2.91193	0.333783	3.9843	0.469682		day7	1.68932	0.160392	2.61718	0.127014
IMP	0.35219		0.208113			IMP	0.33673		0.147931			IMP	0.43334		0.199031
TI			0.59091			TI			0.439317			TI			0.459295
SUB7	Trained	error	Orthogonal	error		SUB8	Trained	error	Orthogonal	error		SUB9	Trained	error	Orthogonal	error
day1	3.64918	0.210736	3.54386	0.518365		day1	3.80053	0.608883	2.57001	0.221772		day1	6.2726	0.51719	6.09986	0.533126
day2	2.05097	0.142062				day2	1.78845	0.285107				day2	5.30533	0.738344
day3	2.29652	0.222544				day3	1.99622	0.249172				day3	4.57436	0.245242
day4	1.40429	0.145816				day4	1.55024	0.226541				day4	5.13191	0.487535
day5	1.56445	0.0931325				day5	1.53404	0.136166				day5	2.94601	0.389889
day6	1.56621	0.0903916				day6	1.28116	0.155603				day6	3.01246	0.299887
day7	1.38134	0.183856	1.66693	0.109671		day7	1.36581	0.170235	1.90111	0.203953		day7	2.9535	0.177174	3.61623	0.392257
IMP	0.621465		0.529627			IMP	0.640627		0.260268			IMP	0.529142		0.407161
TI			0.852224			TI			0.406272			TI			0.769474
SUB10	Trained	error	Orthogonal	error
day1	5.35362	0.527905	6.33215	0.838829
day2	5.17953	0.267674
day3	5.13669	0.318053
day4	4.49283	0.439557
day5	4.33498	0.312478
day6	4.54868	0.282154
day7	4.06987	0.346324	4.5203	0.738497
IMP	0.239791		0.286135
TI			1.19327
Figure 1e
Average(N = 8)
Session	Exposed	error
day1	3.55377	0.468754
day2
day3
day4
day5
day6
day7	3.1156	0.280212
IMP	0.096672	0.0430721
Individuals
SUB1	Exposed	error		SUB2	Exposed	error		SUB3	Exposed	error
day1	3.7992	0.260069		day1	2.97872	0.220545		day1	2.40852	0.323898
day2				day2				day2
day3				day3				day3
day4				day4				day4
day5				day5				day5
day6				day6				day6
day7	3.00937	0.366552		day7	2.51572	0.709514		day7	2.3562	0.384642
IMP	0.207895			IMP	0.155435			IMP	0.0217251
SUB4	Exposed	error		SUB5	Exposed	error		SUB6	Exposed	error
day1	3.12862	0.256399		day1	2.97218	0.318333		day1	2.89632	0.148647
day2				day2				day2
day3				day3				day3
day4				day4				day4
day5				day5				day5
day6				day6				day6
day7	2.59485	0.533803		day7	3.07594	0.218303		day7	2.88762	0.113365
IMP	0.170609			IMP	-0.0349081			IMP	0.0030029
SUB7	Exposed	error		SUB8	Exposed	error
day1	6.66023	0.512626		day1	3.58639	0.317905
day2				day2
day3				day3
day4				day4
day5				day5
day6				day6
day7	4.78315	0.13565		day7	3.70193	0.385234
IMP	0.281833			IMP	-0.032216
Figure 1f
Average(N = 10)
Session	Trained	error	Orthogonal	error
day1	3.8014	0.189282	3.66455	0.213556
day2	2.90643	0.178383
day3	2.61908	0.154232
day4	2.41008	0.155754
day5	2.35632	0.135017
day6	2.17539	0.169031
day7	1.99613	0.117802	3.03202	0.13149
	0.467282	0.0335663	0.133804	0.0877461
			0.240261	0.243351
Individuals
SUB1	Trained	error	Orthogonal	error		SUB2	Trained	error	Orthogonal	error		SUB3	Trained	error	Orthogonal	error
day1	2.79426	0.427038	3.05105	0.0967962		day1	3.49384	0.560403	3.74156	0.389816		day1	3.83312	0.470407	3.48709	0.364373
day2	2.90214	0.216835				day2	2.1813	0.186027				day2	3.12521	0.346583
day3	2.79751	0.340459				day3	2.49374	0.228399				day3	2.51809	0.200609
day4	1.72823	0.111256				day4	1.89955	0.127805				day4	2.38321	0.130032
day5	1.98941	0.171871				day5	2.05478	0.333195				day5	2.55085	0.316817
day6	1.24082	0.104317				day6	2.44504	0.212225				day6	1.96575	0.186724
day7	1.47027	0.448026	2.6208	0.336687		day7	1.80072	0.212453	3.08281	0.220495		day7	2.39725	0.32437	2.79439	0.623424
IMP	0.473826		0.141017			IMP	0.484601		0.176063			IMP	0.374595		0.198648
			0.297613						0.363316						0.530301
SUB4	Trained	error	Orthogonal	error		SUB5	Trained	error	Orthogonal	error		SUB6	Trained	error	Orthogonal	error
day1	3.07334	0.309352	2.36777	0.428843		day1	3.558	0.408098	3.96022	0.17989		day1	4.58883	0.341455	4.07617	0.189768
day2	2.46434	0.278867				day2	2.78981	0.262568				day2	3.6906	0.281507
day3	2.39884	0.139532				day3	2.84085	0.16889				day3	3.3297	0.176738
day4	2.4562	0.137949				day4	2.52379	0.238975				day4	2.77	0.220962
day5	2.24056	0.249911				day5	2.45125	0.211641				day5	2.4099	0.229742
day6	2.47454	0.194315				day6	1.84249	0.130913				day6	2.6551	0.226838
day7	2.07845	0.167553	3.74118	0.422116		day7	2.31703	0.226469	2.42471	0.234734		day7	2.0314	0.204793	3.06675	0.41044
IMP	0.323716		-0.580043			IMP	0.348784		0.387733			IMP	0.557317		0.247639
			-1.79183						1.11167						0.444341
SUB7	Trained	error	Orthogonal	error		SUB8	Trained	error	Orthogonal	error		SUB9	Trained	error	Orthogonal	error
day1	3.87626	0.54738	4.18645	0.281955		day1	4.64201	0.383109	3.12508	0.387253		day1	3.93416	0.263211	4.72275	0.173039
day2	2.13768	0.210051				day2	3.49949	0.270549				day2	2.6801	0.226505
day3	1.46905	0.140125				day3	3.00847	0.297939				day3	2.63863	0.0991879
day4	1.88724	0.181011				day4	3.18867	0.255963				day4	2.223	0.210558
day5	1.61254	0.310989				day5	2.46805	0.277522				day5	2.56854	0.260102
day6	1.58905	0.151984				day6	2.83717	0.26532				day6	1.96032	0.165982
day7	1.73634	0.3295	3.39714	0.701265		day7	1.81008	0.226811	3.0073	0.215737		day7	1.65659	0.245213	2.69651	0.182938
IMP	0.552057		0.188539			IMP	0.610066		0.0376889			IMP	0.578922		0.429039
			0.34152						0.0617784						0.7411
SUB10	Trained	error	Orthogonal	error
day1	4.22015	0.292499	3.92736	0.230841
day2	3.59364	0.184588
day3	2.69589	0.155298
day4	3.04087	0.298197
day5	3.21728	0.232554
day6	2.74365	0.129666
day7	2.66319	0.254149	3.48862	0.245163
IMP	0.368935		0.111713
			0.302799
Figure 1g
Improvement
	Trained	error	Orthogonal	error
Fig 1a	0.428934	0.0340246	0.118076	0.0461247
	Trained	error	Orthogonal	error
Fig 1d	0.481834	0.0543264	0.337014	0.0459888
			Exposed	error
Fig 1e			0.096672	0.0430721
	Trained	error	Orthogonal	error
Fig 1f	0.467282	0.0335663	0.133804	0.0877461
Figure 1h
Transfer index
	TI	err
Fig 1a	0.255222	0.102715
Fig 1d	0.719858	0.0792081
Fig 1f	0.240261	0.243351

## Sheet: Raw_Fig1a
ID	date	contrast	spatial frequency (c/d)	standard deviation (deg)	orientation (deg)	threshold	preliminary reversals				experimental reversals
sub1	2012-07-17	47	1.5	0.48	36	3.037	10	5.012	5.623	3.162	3.548	2.818	5.623	1.995	2.239	1.995
sub1	2012-07-17	47	1.5	0.48	36	2.268	1.585	2.239	1.995	2.239	1.778	1.995	1.778	2.512	1.995	3.548
sub1	2012-07-17	47	1.5	0.48	36	4.152	3.981	5.623	3.981	5.012	3.981	4.467	3.548	4.467	3.981	4.467
sub1	2012-07-17	47	1.5	0.48	36	2.562	1.585	2.818	2.512	2.818	1.995	2.239	1.995	3.162	2.818	3.162
sub1	2012-07-17	47	1.5	0.48	36	4.414	5.012	6.31	5.012	6.31	4.467	5.012	4.467	5.012	3.548	3.981
sub1	2012-07-17	47	1.5	0.48	36	5.404	7.943	6.31	7.079	5.623	6.31	5.623	6.31	5.012	5.623	3.548
sub1	2012-07-17	47	1.5	0.48	126	4.09	7.943	5.623	6.31	4.467	5.012	3.548	3.981	3.548	4.467	3.981
sub1	2012-07-17	47	1.5	0.48	126	3.579	3.981	5.012	3.981	5.012	3.162	3.981	3.548	3.981	2.818	3.981
sub1	2012-07-17	47	1.5	0.48	126	5.227	5.012	6.31	5.012	5.623	4.467	5.623	5.012	5.623	5.012	5.623
sub1	2012-07-17	47	1.5	0.48	126	5.774	5.012	7.943	6.31	8.913	5.623	6.31	4.467	6.31	5.623	6.31
sub1	2012-07-17	47	1.5	0.48	126	3.999	7.943	4.467	5.012	3.548	4.467	3.981	4.467	3.548	3.981	3.548
sub1	2012-07-17	47	1.5	0.48	126	3.846	7.943	5.012	5.623	3.162	4.467	3.548	3.981	3.548	3.981	3.548
sub1	2012-07-18	47	1.5	0.48	36	4.739	5.012	6.31	5.623	6.31	4.467	5.012	4.467	5.012	4.467	5.012
sub1	2012-07-18	47	1.5	0.48	36	2.922	3.981	6.31	3.162	3.548	2.512	2.818	2.239	3.162	2.818	3.981
sub1	2012-07-18	47	1.5	0.48	36	3.736	3.981	5.012	3.162	4.467	3.548	3.981	3.162	3.548	3.162	5.012
sub1	2012-07-18	47	1.5	0.48	36	2.888	3.162	3.981	2.818	3.162	2.512	3.162	2.512	3.162	2.818	3.162
sub1	2012-07-18	47	1.5	0.48	36	1.859	1.995	2.512	2.239	2.512	1.778	2.239	1.778	1.995	1.585	1.778
sub1	2012-07-18	47	1.5	0.48	36	1.762	2.512	3.162	2.239	2.512	1.778	2.239	1.585	1.778	1.413	1.778
sub1	2012-07-18	47	1.5	0.48	36	1.505	1.259	1.778	1.585	1.778	1.413	1.585	1.259	1.778	1.413	1.585
sub1	2012-07-18	47	1.5	0.48	36	2.534	7.943	4.467	5.012	2.818	3.548	3.162	3.548	1.585	1.778	1.585
sub1	2012-07-18	47	1.5	0.48	36	2.058	1.995	2.512	1.585	1.778	1.585	2.512	1.995	2.239	1.778	2.239
sub1	2012-07-18	47	1.5	0.48	36	1.264	1.585	1.995	1.778	1.995	1.122	1.259	1.122	1.413	1.259	1.413
sub1	2012-07-18	47	1.5	0.48	36	2.345	2.512	3.162	2.512	2.818	2.512	2.818	1.995	2.239	1.995	2.512
sub1	2012-07-18	47	1.5	0.48	36	2.734	3.162	3.981	3.548	3.981	2.818	3.162	2.512	3.162	2.239	2.512
sub1	2012-07-18	47	1.5	0.48	36	2.712	2.512	3.162	2.818	3.162	2.239	2.512	1.995	3.162	2.818	3.548
sub1	2012-07-18	47	1.5	0.48	36	2.065	1	1.995	1.259	1.995	1.778	1.995	1.778	2.239	1.778	2.818
sub1	2012-07-18	47	1.5	0.48	36	1.683	2.512	3.162	2.239	2.512	1.995	2.239	1.413	1.778	1.259	1.413
sub1	2012-07-18	47	1.5	0.48	36	3.71	3.162	3.981	3.548	6.31	4.467	5.012	2.818	3.162	2.818	3.981
sub1	2012-07-18	47	1.5	0.48	36	1.444	3.162	3.981	1.413	1.585	1.413	1.585	1.413	1.585	1.259	1.413
sub1	2012-07-19	47	1.5	0.48	36	2.06	3.162	3.981	1.995	2.239	1.995	2.818	1.778	1.995	1.778	1.995
sub1	2012-07-19	47	1.5	0.48	36	1.866	2.512	3.981	2.818	3.162	1.778	2.239	1.413	1.995	1.778	1.995
sub1	2012-07-19	47	1.5	0.48	36	1.669	3.981	5.012	3.548	3.981	1.413	1.585	1.413	1.778	1.585	2.239
sub1	2012-07-19	47	1.5	0.48	36	2.3	1.995	2.512	2.239	2.512	2.239	2.512	1.995	2.239	1.995	2.818
sub1	2012-07-19	47	1.5	0.48	36	2.029	1.585	2.239	1.995	2.512	2.239	2.512	1.413	1.995	1.778	2.239
sub1	2012-07-19	47	1.5	0.48	36	3.017	2.512	3.548	3.162	3.548	3.162	3.548	2.512	3.548	2.512	2.818
sub1	2012-07-19	47	1.5	0.48	36	2.787	1.585	1.995	1.778	2.818	2.512	2.818	2.512	3.548	2.512	2.818
sub1	2012-07-19	47	1.5	0.48	36	2.19	1.995	2.512	2.239	2.512	1.585	2.512	1.778	2.512	2.239	2.512
sub1	2012-07-19	47	1.5	0.48	36	2.482	7.943	2.512	3.162	2.818	3.548	2.512	2.818	1.778	2.239	1.995
sub1	2012-07-19	47	1.5	0.48	36	1.775	1.995	2.512	2.239	2.512	2.239	2.512	1.585	1.778	1.122	1.413
sub1	2012-07-19	47	1.5	0.48	36	2.426	2.512	3.162	2.818	3.548	2.239	2.512	2.239	2.818	2.239	2.512
sub1	2012-07-19	47	1.5	0.48	36	3.298	1.995	2.818	2.512	3.162	2.818	3.548	3.162	3.548	3.162	3.548
sub1	2012-07-19	47	1.5	0.48	36	2.694	2.512	3.162	2.512	2.818	1.995	3.162	2.512	2.818	2.512	3.162
sub1	2012-07-19	47	1.5	0.48	36	3.277	1.995	3.162	2.818	3.548	2.512	2.818	2.239	4.467	3.162	4.467
sub1	2012-07-19	47	1.5	0.48	36	2.699	3.162	3.981	3.548	3.981	2.818	3.162	2.818	3.162	1.995	2.239
sub1	2012-07-19	47	1.5	0.48	36	3.298	3.162	3.981	3.162	3.548	2.818	3.548	3.162	3.548	3.162	3.548
sub1	2012-07-19	47	1.5	0.48	36	2.417	3.162	3.981	3.548	3.981	3.162	3.548	1.778	1.995	1.778	2.239
sub1	2012-07-21	47	1.5	0.48	36	2.249	3.162	3.981	2.512	2.818	1.995	2.239	1.995	2.512	2.239	2.512
sub1	2012-07-21	47	1.5	0.48	36	3.148	5.012	6.31	5.012	5.623	5.012	5.623	1.995	2.239	1.778	2.239
sub1	2012-07-21	47	1.5	0.48	36	3.645	3.162	4.467	3.548	4.467	3.548	4.467	3.162	3.548	3.162	3.981
sub1	2012-07-21	47	1.5	0.48	36	2.136	3.981	5.012	2.512	2.818	1.778	1.995	1.778	2.512	2.239	2.512
sub1	2012-07-21	47	1.5	0.48	36	2.203	1.995	2.512	2.239	2.512	1.585	2.239	1.995	3.162	1.995	2.239
sub1	2012-07-21	47	1.5	0.48	36	1.483	2.512	3.162	1.413	1.585	1.413	1.778	1.259	1.413	1.259	1.778
sub1	2012-07-21	47	1.5	0.48	36	2.214	2.512	3.162	2.239	2.512	1.995	2.239	1.995	2.239	1.995	2.818
sub1	2012-07-21	47	1.5	0.48	36	1.913	2.512	3.162	1.995	2.512	2.239	2.512	1.585	1.778	1.585	1.778
sub1	2012-07-21	47	1.5	0.48	36	2.404	2.512	3.162	2.818	3.981	3.162	3.548	2.512	2.818	1.122	1.259
sub1	2012-07-21	47	1.5	0.48	36	1.422	2.512	3.162	1.413	1.585	1.413	1.778	1.259	1.413	1.259	1.413
sub1	2012-07-21	47	1.5	0.48	36	3.125	1.585	2.512	1.995	3.162	2.512	3.548	3.162	3.548	2.818	3.162
sub1	2012-07-21	47	1.5	0.48	36	1.701	1.585	1.995	1.778	2.239	1.413	2.239	1.585	1.778	1.413	1.778
sub1	2012-07-21	47	1.5	0.48	36	2.523	3.981	5.012	4.467	5.012	2.239	2.512	2.239	2.818	2.512	2.818
sub1	2012-07-21	47	1.5	0.48	36	2.376	2.512	3.162	2.818	3.548	3.162	3.548	1.778	1.995	1.778	1.995
sub1	2012-07-21	47	1.5	0.48	36	1.949	3.162	3.981	1.585	1.778	1.585	1.778	1.585	2.512	1.995	2.239
sub1	2012-07-21	47	1.5	0.48	36	2.463	2.512	3.162	2.818	3.162	2.512	2.818	2.512	3.162	1.778	1.995
sub1	2012-07-21	47	1.5	0.48	36	1.766	1.995	2.512	1.585	1.778	1.585	1.995	1.585	2.239	1.413	1.778
sub1	2012-07-22	47	1.5	0.48	36	2.413	2.512	3.162	2.512	2.818	1.995	2.512	1.995	3.162	1.995	2.818
sub1	2012-07-22	47	1.5	0.48	36	2.004	1.995	2.818	2.239	2.512	1.995	2.239	1.778	1.995	1.778	2.239
sub1	2012-07-22	47	1.5	0.48	36	2.523	3.162	3.981	3.162	3.981	2.512	2.818	2.239	2.512	2.239	2.818
sub1	2012-07-22	47	1.5	0.48	36	1.895	2.512	3.162	1.995	2.239	1.778	1.995	1.585	1.995	1.778	2.239
sub1	2012-07-22	47	1.5	0.48	36	2.212	1.585	2.512	2.239	2.818	1.778	2.239	1.995	2.512	2.239	2.512
sub1	2012-07-22	47	1.5	0.48	36	0.85	0.631	0.794	0.708	0.891	0.708	0.794	0.708	0.891	0.794	1
sub1	2012-07-22	47	1.5	0.48	36	1.559	1.995	2.512	1.778	1.995	1.778	1.995	1.413	1.585	1	1.585
sub1	2012-07-22	47	1.5	0.48	36	1.483	2.512	3.162	2.818	3.548	1.413	1.585	1.413	1.778	1.122	1.585
sub1	2012-07-22	47	1.5	0.48	36	1.852	1.259	1.585	1.259	1.585	1.413	2.512	1.585	1.778	1.585	2.239
sub1	2012-07-22	47	1.5	0.48	36	1.183	0.794	1	0.891	1	0.891	1.122	1	1.413	1.259	1.413
sub1	2012-07-22	47	1.5	0.48	36	2.197	3.162	3.981	1.413	1.995	1.413	2.512	2.239	2.512	1.995	2.512
sub1	2012-07-22	47	1.5	0.48	36	1.348	1.259	1.778	1.413	1.585	1.122	1.413	1.259	1.585	1.122	1.585
sub1	2012-07-22	47	1.5	0.48	36	1.964	1.995	2.512	1.995	2.239	1.995	2.239	1.778	1.995	1.778	1.995
sub1	2012-07-22	47	1.5	0.48	36	1.244	1.585	2.512	1.259	1.585	1.259	1.413	1.259	1.413	1	1.122
sub1	2012-07-22	47	1.5	0.48	36	2.375	5.012	6.31	2.512	2.818	2.239	2.512	2.239	2.512	2.239	2.512
sub1	2012-07-22	47	1.5	0.48	36	1.798	3.162	3.981	1.778	1.995	1.778	2.239	1.585	1.778	1.413	1.995
sub1	2012-07-22	47	1.5	0.48	36	1.244	1.259	1.585	0.891	1.122	0.891	1.259	1.122	1.413	1	1.778
sub1	2012-07-23	47	1.5	0.48	36	2.222	3.162	3.981	2.512	2.818	2.512	2.818	2.512	2.818	1.259	1.413
sub1	2012-07-23	47	1.5	0.48	36	1.826	3.981	5.012	2.512	2.818	1.778	1.995	1.413	1.995	1.778	1.995
sub1	2012-07-23	47	1.5	0.48	36	2.699	2.512	3.548	3.162	3.548	2.818	3.162	2.818	3.162	1.995	2.239
sub1	2012-07-23	47	1.5	0.48	36	1.714	2.512	3.162	1.778	1.995	1.778	2.512	1.413	1.585	1.413	1.585
sub1	2012-07-23	47	1.5	0.48	36	1.887	3.162	3.981	1.585	1.995	1.778	1.995	1.778	1.995	1.778	1.995
sub1	2012-07-23	47	1.5	0.48	36	2.375	1.995	2.512	2.239	2.512	2.239	2.512	2.239	2.512	2.239	2.512
sub1	2012-07-23	47	1.5	0.48	36	2.446	1.585	2.239	1.778	1.995	1.778	2.818	2.512	2.818	2.239	2.512
sub1	2012-07-23	47	1.5	0.48	36	2.14	1.995	2.512	1.778	2.239	1.995	2.512	2.239	2.512	1.585	1.995
sub1	2012-07-23	47	1.5	0.48	36	3.055	2.512	3.162	2.818	3.162	2.818	3.162	2.818	3.162	2.818	3.548
sub1	2012-07-23	47	1.5	0.48	36	1.201	1.259	1.585	0.794	0.891	0.708	1.122	1	1.259	1.122	1.995
sub1	2012-07-23	47	1.5	0.48	36	1.931	2.512	3.162	2.818	3.162	1.995	2.239	1.778	1.995	1.585	1.995
sub1	2012-07-23	47	1.5	0.48	36	2.075	1.585	1.995	1.259	1.585	1.413	1.995	1.778	2.512	2.239	2.512
sub1	2012-07-23	47	1.5	0.48	36	1.971	3.981	5.012	3.981	5.012	1.259	2.512	1.585	2.239	1.995	2.239
sub1	2012-07-23	47	1.5	0.48	36	2.161	3.162	3.981	1.585	2.239	1.413	2.512	1.778	2.512	2.239	2.512
sub1	2012-07-23	47	1.5	0.48	36	1.566	1.585	2.239	1.585	1.778	1.585	1.778	1.585	1.778	1.259	1.413
sub1	2012-07-23	47	1.5	0.48	36	2.004	2.512	3.162	2.818	3.548	1.995	2.239	1.778	1.995	1.778	2.239
sub1	2012-07-23	47	1.5	0.48	36	2.666	3.981	5.012	4.467	5.012	3.548	3.981	1.995	2.239	1.995	2.239
sub1	2012-07-24	47	1.5	0.48	36	1.061	1.259	1.778	1.585	1.778	1	1.122	1	1.122	1	1.122
sub1	2012-07-24	47	1.5	0.48	36	1.19	1	1.259	1.122	1.585	1.122	1.259	1.122	1.259	1.122	1.259
sub1	2012-07-24	47	1.5	0.48	36	1.912	2.512	3.162	2.239	2.512	1.995	2.512	1.778	1.995	1.413	1.778
sub1	2012-07-24	47	1.5	0.48	36	2.103	1.585	1.995	1.778	2.239	1.995	2.512	2.239	2.512	1.585	1.778
sub1	2012-07-24	47	1.5	0.48	36	2.335	1.995	2.512	2.239	2.512	2.239	2.512	1.995	2.512	2.239	2.512
sub1	2012-07-24	47	1.5	0.48	126	2.85	5.012	7.943	4.467	5.012	3.162	3.548	2.512	2.818	2.239	2.818
sub1	2012-07-24	47	1.5	0.48	126	2.437	1.995	2.818	2.239	2.512	2.239	2.818	2.239	2.818	1.995	2.512
sub1	2012-07-24	47	1.5	0.48	126	3.862	3.981	5.012	3.548	5.623	3.981	4.467	3.548	4.467	3.162	3.548
sub1	2012-07-24	47	1.5	0.48	126	4.053	7.943	5.623	6.31	5.623	6.31	5.012	5.623	2.239	3.548	1.585
sub1	2012-07-24	47	1.5	0.48	126	2.722	2.512	3.162	2.818	3.162	2.512	2.818	2.512	2.818	2.512	3.162
sub2	2012-07-18	47	1.5	0.48	36	5.777	5.012	7.079	6.31	7.079	6.31	7.079	5.012	5.623	5.012	5.623
sub2	2012-07-18	47	1.5	0.48	36	5.718	5.012	6.31	4.467	6.31	3.981	5.012	3.981	7.079	6.31	7.943
sub2	2012-07-18	47	1.5	0.48	36	3.563	2.512	3.548	3.162	3.548	3.162	5.012	2.512	3.548	3.162	3.981
sub2	2012-07-18	47	1.5	0.48	36	6.58	10	7.943	8.913	6.31	7.079	6.31	7.079	6.31	7.079	5.623
sub2	2012-07-18	47	1.5	0.48	36	5.584	7.943	5.012	7.079	5.012	7.079	5.012	5.623	5.012	6.31	4.467
sub2	2012-07-18	47	1.5	0.48	36	7.689	7.943	5.012	7.079	5.623	7.943	6.31	7.943	7.079	8.913	7.943
sub2	2012-07-18	47	1.5	0.48	126	6.38	10	7.943	8.913	5.623	6.31	5.012	6.31	5.623	7.943	7.079
sub2	2012-07-18	47	1.5	0.48	126	5.104	2.512	5.012	4.467	6.31	3.162	4.467	3.981	6.31	5.623	7.079
sub2	2012-07-18	47	1.5	0.48	126	4.333	7.943	6.31	7.079	3.548	3.981	3.548	5.012	4.467	5.012	3.981
sub2	2012-07-18	47	1.5	0.48	126	4.637	3.981	5.012	3.548	3.981	3.548	4.467	3.548	5.623	5.012	5.623
sub2	2012-07-18	47	1.5	0.48	126	6.838	3.162	5.012	4.467	7.079	6.31	7.079	6.31	7.079	6.31	7.943
sub2	2012-07-18	47	1.5	0.48	126	6.367	3.981	6.31	5.012	6.31	5.623	6.31	5.623	7.943	5.623	7.079
sub2	2012-07-19	47	1.5	0.48	126	3.599	7.943	4.467	6.31	4.467	5.012	3.162	3.548	3.162	3.548	3.162
sub2	2012-07-19	47	1.5	0.48	126	4.487	3.981	5.012	4.467	5.012	3.981	5.012	4.467	5.012	3.981	4.467
sub2	2012-07-19	47	1.5	0.48	126	5.263	3.981	5.012	3.981	5.623	4.467	5.012	4.467	6.31	5.012	6.31
sub2	2012-07-19	47	1.5	0.48	126	3.889	5.012	7.079	4.467	5.012	3.981	4.467	3.162	3.548	3.162	5.012
sub2	2012-07-19	47	1.5	0.48	126	4.025	5.012	6.31	4.467	5.623	3.162	3.981	3.548	5.012	3.981	4.467
sub2	2012-07-19	47	1.5	0.48	126	3.088	5.012	6.31	5.623	6.31	3.981	4.467	2.512	2.818	2.239	2.512
sub2	2012-07-19	47	1.5	0.48	126	5.605	3.162	6.31	5.623	6.31	3.981	5.623	5.012	7.079	5.623	6.31
sub2	2012-07-19	47	1.5	0.48	126	4.76	5.012	6.31	4.467	5.623	4.467	5.012	4.467	5.012	3.981	5.623
sub2	2012-07-19	47	1.5	0.48	126	5.493	5.012	6.31	4.467	5.623	4.467	5.012	4.467	7.079	5.623	6.31
sub2	2012-07-19	47	1.5	0.48	126	6.367	3.162	4.467	3.981	6.31	5.623	6.31	5.623	7.079	5.623	7.943
sub2	2012-07-19	47	1.5	0.48	126	5.252	5.012	6.31	5.623	6.31	5.623	7.079	5.012	5.623	3.162	5.012
sub2	2012-07-19	47	1.5	0.48	126	4.478	2.512	3.162	2.818	4.467	3.548	3.981	3.548	6.31	4.467	5.012
sub2	2012-07-19	47	1.5	0.48	126	3.262	3.981	5.012	3.981	4.467	3.548	3.981	2.512	3.548	2.818	3.162
sub2	2012-07-19	47	1.5	0.48	126	5.865	7.943	5.623	6.31	5.012	6.31	5.623	6.31	5.623	6.31	5.012
sub2	2012-07-19	47	1.5	0.48	126	6.137	7.943	5.623	7.079	5.623	6.31	5.623	6.31	5.623	7.943	5.012
sub2	2012-07-19	47	1.5	0.48	126	4.396	5.012	6.31	4.467	5.012	4.467	5.012	3.981	4.467	3.981	4.467
sub2	2012-07-21	47	1.5	0.48	126	3.043	5.012	7.079	5.012	6.31	3.548	3.981	2.512	3.162	2.239	2.818
sub2	2012-07-21	47	1.5	0.48	126	5.966	5.012	7.079	6.31	7.079	5.623	6.31	5.623	6.31	5.623	6.31
sub2	2012-07-21	47	1.5	0.48	126	3.541	7.943	3.981	5.012	3.981	5.012	2.239	4.467	2.818	3.548	3.162
sub2	2012-07-21	47	1.5	0.48	126	4.152	3.981	5.012	3.548	3.981	3.548	4.467	3.981	4.467	3.981	4.467
sub2	2012-07-21	47	1.5	0.48	126	5.456	3.981	5.623	3.981	6.31	4.467	6.31	5.012	6.31	5.012	5.623
sub2	2012-07-21	47	1.5	0.48	126	4.658	3.981	5.623	4.467	5.012	4.467	5.012	3.981	5.012	4.467	5.012
sub2	2012-07-21	47	1.5	0.48	126	4.931	3.981	5.012	3.162	3.548	3.162	5.012	4.467	6.31	5.012	5.623
sub2	2012-07-21	47	1.5	0.48	126	3.71	3.981	5.012	2.818	3.162	2.818	3.162	2.818	4.467	3.981	5.012
sub2	2012-07-21	47	1.5	0.48	126	3.927	5.012	6.31	5.623	7.943	3.548	3.981	3.548	4.467	3.548	4.467
sub2	2012-07-21	47	1.5	0.48	126	6.12	7.943	6.31	7.079	6.31	8.913	5.623	7.079	5.012	5.623	4.467
sub2	2012-07-21	47	1.5	0.48	126	6.198	5.012	6.31	5.012	5.623	5.012	10	6.31	7.079	3.162	5.623
sub2	2012-07-21	47	1.5	0.48	126	5.493	3.981	5.623	4.467	7.943	4.467	5.012	4.467	6.31	5.623	7.079
sub2	2012-07-21	47	1.5	0.48	126	6.236	5.012	8.913	5.623	6.31	5.623	6.31	5.012	7.079	6.31	7.079
sub2	2012-07-21	47	1.5	0.48	126	5.169	5.012	6.31	5.623	6.31	4.467	5.623	3.981	5.623	5.012	6.31
sub2	2012-07-21	47	1.5	0.48	126	5.993	7.943	5.623	7.079	5.623	7.079	5.012	6.31	5.623	6.31	5.623
sub2	2012-07-21	47	1.5	0.48	126	4.871	3.162	4.467	3.981	5.012	3.981	5.623	5.012	7.079	3.548	3.981
sub2	2012-07-22	47	1.5	0.48	126	4.259	5.012	7.943	7.079	7.943	4.467	5.012	3.981	4.467	3.162	4.467
sub2	2012-07-22	47	1.5	0.48	126	4.953	7.943	3.981	4.467	2.818	5.012	3.981	5.623	5.012	5.623	4.467
sub2	2012-07-22	47	1.5	0.48	126	3.736	3.162	5.012	3.162	3.981	3.162	3.548	3.162	3.981	3.548	5.012
sub2	2012-07-22	47	1.5	0.48	126	5.982	3.162	5.012	4.467	5.012	4.467	7.943	6.31	7.079	4.467	5.623
sub2	2012-07-22	47	1.5	0.48	126	5.146	3.981	5.012	3.981	4.467	3.981	5.623	5.012	5.623	5.012	5.623
sub2	2012-07-22	47	1.5	0.48	126	4.76	7.943	5.012	5.623	3.981	4.467	3.981	5.012	4.467	5.623	5.012
sub2	2012-07-22	47	1.5	0.48	126	5.519	3.981	5.012	4.467	5.012	4.467	5.012	4.467	7.079	5.012	7.079
sub2	2012-07-22	47	1.5	0.48	126	7.255	10	7.079	7.943	7.079	7.943	7.079	7.943	6.31	7.943	6.31
sub2	2012-07-22	47	1.5	0.48	126	4.668	2.512	3.981	3.548	3.981	3.162	4.467	3.981	6.31	4.467	5.623
sub2	2012-07-22	47	1.5	0.48	126	4.794	3.981	6.31	5.012	5.623	4.467	5.012	3.981	6.31	3.981	5.012
sub2	2012-07-22	47	1.5	0.48	126	5.015	3.162	3.981	3.548	3.981	3.548	3.981	3.548	7.079	5.623	6.31
sub2	2012-07-22	47	1.5	0.48	126	7.3	7.943	5.623	7.943	7.079	7.943	4.467	8.913	7.943	8.913	5.623
sub2	2012-07-22	47	1.5	0.48	126	4.686	2.512	3.162	2.818	3.981	3.162	3.548	3.162	6.31	5.623	6.31
sub2	2012-07-22	47	1.5	0.48	126	4.197	3.981	5.012	4.467	5.012	3.981	4.467	3.162	5.012	3.548	5.012
sub2	2012-07-22	47	1.5	0.48	126	2.952	3.162	4.467	3.548	3.981	2.512	3.162	2.239	2.818	2.512	4.467
sub2	2012-07-22	47	1.5	0.48	126	5.993	5.012	7.079	5.623	6.31	5.623	7.079	5.623	6.31	5.012	6.31
sub2	2012-07-23	47	1.5	0.48	126	4.487	5.012	6.31	3.981	4.467	3.981	5.012	4.467	5.012	3.981	4.467
sub2	2012-07-23	47	1.5	0.48	126	3.434	7.943	5.012	5.623	3.162	3.548	3.162	3.548	2.818	3.981	3.548
sub2	2012-07-23	47	1.5	0.48	126	5.712	2.512	3.162	2.818	5.012	4.467	5.623	5.012	7.079	5.012	7.079
sub2	2012-07-23	47	1.5	0.48	126	4.178	2.512	3.548	3.162	3.548	3.162	4.467	3.981	5.012	3.981	4.467
sub2	2012-07-23	47	1.5	0.48	126	3.385	3.162	4.467	3.981	5.012	2.818	3.162	2.818	3.981	3.548	3.981
sub2	2012-07-23	47	1.5	0.48	126	5.277	5.012	6.31	5.623	7.079	5.012	5.623	4.467	7.079	4.467	5.012
sub2	2012-07-23	47	1.5	0.48	126	4.84	2.512	3.548	3.162	5.012	4.467	6.31	4.467	5.012	3.162	5.623
sub2	2012-07-23	47	1.5	0.48	126	3.363	3.162	3.981	1.995	3.162	2.818	3.548	2.818	3.162	2.818	5.012
sub2	2012-07-23	47	1.5	0.48	126	3.936	3.981	5.623	4.467	5.012	3.548	3.981	3.548	5.012	3.548	3.981
sub2	2012-07-23	47	1.5	0.48	126	2.787	3.162	3.981	3.162	3.981	2.512	2.818	2.512	2.818	2.512	3.548
sub2	2012-07-23	47	1.5	0.48	126	2.838	3.162	3.981	3.162	3.981	3.548	3.981	2.239	2.512	2.239	2.512
sub2	2012-07-23	47	1.5	0.48	126	4.299	2.512	3.981	3.548	4.467	3.981	5.623	4.467	5.012	3.162	3.548
sub2	2012-07-23	47	1.5	0.48	126	3.209	5.012	6.31	3.981	4.467	2.512	2.818	2.512	3.548	2.239	5.623
sub2	2012-07-23	47	1.5	0.48	126	4.025	3.981	5.012	3.548	4.467	3.548	4.467	3.981	5.012	3.162	3.981
sub2	2012-07-23	47	1.5	0.48	126	3.765	3.981	5.012	3.548	3.981	3.548	3.981	3.548	3.981	3.548	3.981
sub2	2012-07-23	47	1.5	0.48	126	3.176	3.162	3.981	3.548	3.981	3.162	3.548	2.818	3.162	2.818	3.548
sub2	2012-07-24	47	1.5	0.48	126	2.631	3.981	5.012	3.548	4.467	3.162	3.548	2.239	2.818	1.778	2.239
sub2	2012-07-24	47	1.5	0.48	126	3.597	3.162	3.981	3.548	4.467	3.981	5.012	3.548	3.981	2.239	2.818
sub2	2012-07-24	47	1.5	0.48	126	3.58	2.512	3.162	2.818	3.548	3.162	3.548	3.162	3.981	3.162	4.467
sub2	2012-07-24	47	1.5	0.48	126	2.511	3.162	4.467	2.818	3.162	1.995	2.239	1.995	3.162	2.512	3.162
sub2	2012-07-24	47	1.5	0.48	126	2.741	2.512	3.162	1.585	1.995	1.778	2.512	2.239	3.548	2.818	3.548
sub2	2012-07-24	47	1.5	0.48	126	3.313	2.512	3.162	2.818	3.162	2.818	3.548	3.162	3.548	2.818	3.981
sub2	2012-07-24	47	1.5	0.48	126	3.862	2.512	3.548	2.818	3.548	2.512	2.818	1.585	5.623	5.012	5.623
sub2	2012-07-24	47	1.5	0.48	126	3.592	3.162	4.467	2.818	3.548	2.512	3.981	3.548	3.981	3.548	3.981
sub2	2012-07-24	47	1.5	0.48	126	3.765	7.943	5.012	5.623	3.548	3.981	3.548	3.981	3.548	3.981	3.548
sub2	2012-07-24	47	1.5	0.48	126	3.319	2.512	3.162	2.512	2.818	2.512	3.981	3.162	3.548	3.162	3.548
sub2	2012-07-24	47	1.5	0.48	126	3.035	3.981	5.012	2.239	3.548	3.162	3.548	2.818	3.548	1.585	3.548
sub2	2012-07-24	47	1.5	0.48	126	4.224	2.512	3.162	2.512	4.467	3.981	4.467	3.981	4.467	3.981	4.467
sub2	2012-07-24	47	1.5	0.48	126	4.261	3.981	5.012	4.467	5.012	3.548	5.012	4.467	5.012	3.548	3.981
sub2	2012-07-24	47	1.5	0.48	126	3.225	2.512	3.162	2.512	2.818	2.512	2.818	2.512	3.981	3.548	3.981
sub2	2012-07-24	47	1.5	0.48	126	3.603	3.981	5.012	3.162	3.981	3.162	4.467	3.981	4.467	1.995	3.548
sub2	2012-07-24	47	1.5	0.48	126	3.076	5.012	6.31	3.981	4.467	2.512	3.981	2.818	3.162	2.818	3.162
sub2	2012-07-25	47	1.5	0.48	36	6.264	7.943	6.31	7.943	7.079	7.943	6.31	7.079	3.548	7.079	5.623
sub2	2012-07-25	47	1.5	0.48	36	4.505	3.981	6.31	5.623	6.31	3.981	5.012	3.548	5.012	4.467	5.012
sub2	2012-07-25	47	1.5	0.48	36	5.412	5.012	6.31	4.467	5.012	3.981	5.012	4.467	6.31	5.623	7.079
sub2	2012-07-25	47	1.5	0.48	36	3.573	3.162	3.981	3.548	3.981	3.162	4.467	2.818	3.162	2.818	5.012
sub2	2012-07-25	47	1.5	0.48	36	6.095	3.162	3.981	3.548	6.31	5.623	6.31	5.623	7.079	5.623	6.31
sub2	2012-07-25	47	1.5	0.48	126	1.981	0.794	1.122	1	1.413	1.259	1.778	1.585	2.512	2.239	2.512
sub2	2012-07-25	47	1.5	0.48	126	3.587	3.162	4.467	2.818	3.548	3.162	3.548	2.818	3.981	3.548	4.467
sub2	2012-07-25	47	1.5	0.48	126	2.831	5.012	6.31	2.512	3.548	2.512	2.818	2.512	3.162	2.818	3.162
sub2	2012-07-25	47	1.5	0.48	126	3.599	5.012	6.31	3.162	5.012	3.162	5.012	3.162	3.548	3.162	3.548
sub2	2012-07-25	47	1.5	0.48	126	3.334	7.943	3.162	3.548	3.162	3.548	3.162	3.981	2.512	3.981	2.818
sub3	2012-07-18	47	1.5	0.48	36	6.035	7.943	5.623	7.943	5.623	7.943	5.012	6.31	5.623	6.31	5.012
sub3	2012-07-18	47	1.5	0.48	36	6.352	12.589	7.079	8.913	7.079	7.943	5.623	6.31	3.981	7.943	6.31
sub3	2012-07-18	47	1.5	0.48	36	5.686	7.943	5.623	6.31	4.467	6.31	5.012	5.623	4.467	7.079	5.623
sub3	2012-07-18	47	1.5	0.48	36	5.865	1.995	5.012	4.467	6.31	5.012	6.31	5.623	6.31	5.623	6.31
sub3	2012-07-18	47	1.5	0.48	36	4.688	3.162	6.31	5.623	6.31	5.012	5.623	4.467	5.012	3.548	4.467
sub3	2012-07-18	47	1.5	0.48	36	3.4	7.943	3.981	4.467	3.981	4.467	3.162	3.548	2.512	3.548	3.162
sub3	2012-07-18	47	1.5	0.48	126	6.58	7.943	5.012	5.623	5.012	7.079	6.31	7.079	6.31	7.079	5.623
sub3	2012-07-18	47	1.5	0.48	126	6.652	7.943	6.31	7.079	6.31	7.079	6.31	7.943	5.623	7.943	5.012
sub3	2012-07-18	47	1.5	0.48	126	7.612	3.981	10	7.943	8.913	3.981	7.079	6.31	10	7.079	11.22
sub3	2012-07-18	47	1.5	0.48	126	5.56	10	7.943	8.913	6.31	7.079	5.012	5.623	5.012	5.623	5.012
sub3	2012-07-18	47	1.5	0.48	126	5.965	5.012	7.079	3.981	4.467	3.981	6.31	5.623	6.31	5.623	7.943
sub3	2012-07-18	47	1.5	0.48	126	5.384	10	5.623	7.079	6.31	8.913	3.548	3.981	3.162	7.079	5.623
sub3	2012-07-19	47	1.5	0.48	36	3.936	3.162	5.012	3.981	4.467	3.548	5.012	3.548	3.981	3.548	3.981
sub3	2012-07-19	47	1.5	0.48	36	2.52	1.995	2.512	1.778	1.995	1.585	1.995	1.778	2.512	2.239	5.012
sub3	2012-07-19	47	1.5	0.48	36	3.614	3.981	5.012	3.548	3.981	3.162	3.548	2.818	3.981	3.162	5.012
sub3	2012-07-19	47	1.5	0.48	36	2.665	3.981	5.012	3.548	3.981	2.512	2.818	2.512	2.818	2.512	2.818
sub3	2012-07-19	47	1.5	0.48	36	3.781	3.162	4.467	3.162	3.548	3.162	3.981	3.548	4.467	3.548	3.981
sub3	2012-07-19	47	1.5	0.48	36	2.967	3.162	4.467	3.981	4.467	2.818	3.162	2.512	2.818	2.512	3.981
sub3	2012-07-19	47	1.5	0.48	36	3.912	5.012	6.31	5.012	5.623	4.467	5.012	3.548	4.467	2.818	3.162
sub3	2012-07-19	47	1.5	0.48	36	5.226	5.012	6.31	5.623	6.31	5.623	6.31	3.162	5.623	5.012	5.623
sub3	2012-07-19	47	1.5	0.48	36	5.318	5.012	7.079	5.623	6.31	5.012	5.623	5.012	5.623	5.012	5.623
sub3	2012-07-19	47	1.5	0.48	36	2.6	3.162	3.981	3.162	3.548	2.818	3.162	2.512	2.818	1.778	2.512
sub3	2012-07-19	47	1.5	0.48	36	4.293	5.012	6.31	5.623	6.31	3.981	5.012	4.467	5.012	2.818	4.467
sub3	2012-07-19	47	1.5	0.48	36	4.105	3.162	3.981	3.548	5.623	5.012	5.623	2.818	3.548	3.162	4.467
sub3	2012-07-19	47	1.5	0.48	36	3.334	1.995	3.981	2.512	3.548	3.162	3.981	3.548	3.981	2.512	2.818
sub3	2012-07-19	47	1.5	0.48	36	4.794	7.943	5.012	7.079	5.623	6.31	3.981	5.012	3.981	5.012	4.467
sub3	2012-07-19	47	1.5	0.48	36	3.427	3.162	3.981	3.162	5.012	3.162	3.548	3.162	3.981	3.162	3.548
sub3	2012-07-19	47	1.5	0.48	36	2.214	1.259	1.778	1.585	2.239	1.995	2.818	1.995	2.239	1.995	2.239
sub3	2012-07-21	47	1.5	0.48	36	3.872	7.943	3.548	3.981	3.162	3.981	3.548	3.981	3.162	5.012	3.548
sub3	2012-07-21	47	1.5	0.48	36	3.125	3.162	3.981	2.239	3.548	3.162	3.548	3.162	3.548	2.512	2.818
sub3	2012-07-21	47	1.5	0.48	36	3.093	2.512	3.162	2.512	2.818	2.512	3.548	3.162	3.548	2.239	3.548
sub3	2012-07-21	47	1.5	0.48	36	4.08	7.943	5.623	7.079	6.31	7.079	3.162	3.548	3.162	3.981	3.548
sub3	2012-07-21	47	1.5	0.48	36	2.774	3.162	3.981	3.162	3.548	2.818	3.162	2.512	2.818	2.512	2.818
sub3	2012-07-21	47	1.5	0.48	36	4.324	7.943	3.548	4.467	3.981	4.467	3.981	4.467	3.548	5.012	4.467
sub3	2012-07-21	47	1.5	0.48	36	3.191	7.943	3.548	3.981	3.548	3.981	2.818	3.162	2.818	3.548	2.818
sub3	2012-07-21	47	1.5	0.48	36	3.176	3.162	3.981	3.548	3.981	2.818	3.162	2.818	3.548	3.162	3.548
sub3	2012-07-21	47	1.5	0.48	36	2.212	2.512	3.162	2.239	2.512	2.239	2.512	1.778	2.239	1.995	2.512
sub3	2012-07-21	47	1.5	0.48	36	4.851	5.012	6.31	5.012	5.623	5.012	5.623	3.981	5.012	4.467	5.012
sub3	2012-07-21	47	1.5	0.48	36	3.298	7.943	3.162	3.548	2.818	3.548	2.818	3.548	3.162	3.548	3.162
sub3	2012-07-21	47	1.5	0.48	36	3.248	3.981	5.012	3.981	4.467	3.548	3.981	2.818	3.162	2.818	3.162
sub3	2012-07-21	47	1.5	0.48	36	3.127	7.943	4.467	5.623	3.548	3.981	2.818	3.162	2.818	3.162	2.818
sub3	2012-07-21	47	1.5	0.48	36	2.882	1.995	2.818	2.512	3.548	2.818	3.162	2.818	3.162	2.512	2.818
sub3	2012-07-21	47	1.5	0.48	36	2.604	3.162	3.981	3.548	3.981	2.818	3.548	1.995	2.512	2.239	2.512
sub3	2012-07-21	47	1.5	0.48	36	1.531	1.995	2.512	1.413	1.585	1.413	1.585	1.413	1.778	1.413	1.585
sub3	2012-07-21	47	1.5	0.48	36	2.62	2.512	3.162	2.512	3.548	2.512	2.818	2.512	2.818	2.239	2.818
sub3	2012-07-23	47	1.5	0.48	36	3.261	3.981	5.012	3.981	4.467	3.548	3.981	3.162	3.548	1.778	3.548
sub3	2012-07-23	47	1.5	0.48	36	3.234	3.981	5.012	2.818	3.548	3.162	3.548	3.162	3.548	2.818	3.162
sub3	2012-07-23	47	1.5	0.48	36	3.18	3.162	3.981	2.239	2.818	2.239	2.818	2.512	3.981	3.548	3.981
sub3	2012-07-23	47	1.5	0.48	36	2.931	3.162	4.467	2.239	3.162	1.995	3.162	2.818	3.548	2.512	3.548
sub3	2012-07-23	47	1.5	0.48	36	3.028	1.995	2.818	2.239	2.512	2.239	2.512	2.239	3.548	3.162	4.467
sub3	2012-07-23	47	1.5	0.48	36	2.799	3.981	5.012	4.467	5.012	2.239	3.548	2.512	2.818	2.512	3.162
sub3	2012-07-23	47	1.5	0.48	36	3.055	3.162	3.981	3.548	3.981	2.818	3.162	2.818	3.548	2.818	3.162
sub3	2012-07-23	47	1.5	0.48	36	2.453	3.162	5.623	3.162	3.981	3.162	3.548	1.995	2.239	1.778	1.995
sub3	2012-07-23	47	1.5	0.48	36	1.855	3.162	3.981	2.818	3.162	1.585	1.995	1.778	1.995	1.778	1.995
sub3	2012-07-23	47	1.5	0.48	36	2.831	3.981	5.012	3.162	5.012	2.512	3.162	2.818	3.162	2.512	2.818
sub3	2012-07-23	47	1.5	0.48	36	2.426	1.585	1.995	1.778	1.995	1.585	2.512	2.239	2.818	2.239	3.162
sub3	2012-07-23	47	1.5	0.48	36	1.689	1.259	1.585	1.413	1.995	1.413	1.778	1.585	1.995	1.585	1.778
sub3	2012-07-23	47	1.5	0.48	36	1.948	2.512	3.548	3.162	3.548	2.512	2.818	1.585	1.778	1.413	1.585
sub3	2012-07-23	47	1.5	0.48	36	2.661	3.162	3.981	3.548	3.981	3.162	3.548	1.995	2.512	2.239	2.512
sub3	2012-07-23	47	1.5	0.48	36	3.125	3.162	3.981	2.512	2.818	2.512	3.162	2.818	3.548	3.162	3.548
sub3	2012-07-23	47	1.5	0.48	36	3.313	3.162	3.981	2.239	3.162	2.818	3.981	2.818	3.548	3.162	3.548
sub3	2012-07-23	47	1.5	0.48	36	3.298	3.981	5.012	3.548	3.981	3.162	3.548	2.818	3.548	3.162	3.548
sub3	2012-07-24	47	1.5	0.48	36	4.485	2.512	3.162	1.995	3.981	3.162	5.012	3.981	6.31	3.981	4.467
sub3	2012-07-24	47	1.5	0.48	36	4.243	3.981	5.012	4.467	5.012	4.467	5.012	3.981	4.467	3.548	3.981
sub3	2012-07-24	47	1.5	0.48	36	2.838	3.981	5.012	4.467	5.012	2.818	3.548	2.512	2.818	2.512	2.818
sub3	2012-07-24	47	1.5	0.48	36	3.977	3.162	3.981	3.548	5.012	4.467	5.012	3.548	4.467	2.818	3.548
sub3	2012-07-24	47	1.5	0.48	36	3.434	2.512	5.012	3.981	4.467	3.548	3.981	3.162	3.548	2.818	3.548
sub3	2012-07-24	47	1.5	0.48	36	3.66	3.162	5.012	4.467	5.623	3.981	4.467	3.548	3.981	2.818	3.162
sub3	2012-07-24	47	1.5	0.48	36	3.22	3.162	4.467	2.818	3.548	1.995	2.818	2.512	4.467	3.548	3.981
sub3	2012-07-24	47	1.5	0.48	36	3.7	2.512	3.162	2.512	4.467	3.548	3.981	3.162	3.981	3.548	3.981
sub3	2012-07-24	47	1.5	0.48	36	3.385	3.162	3.981	3.162	3.548	2.818	3.981	2.818	3.548	3.162	3.981
sub3	2012-07-24	47	1.5	0.48	36	3.507	3.981	7.079	3.162	3.548	3.162	3.981	3.548	3.981	2.818	3.548
sub3	2012-07-24	47	1.5	0.48	36	3.388	3.162	4.467	2.239	2.512	2.239	5.012	3.162	3.548	2.818	3.548
sub3	2012-07-24	47	1.5	0.48	36	3.968	3.981	5.012	3.981	5.012	4.467	5.012	3.548	3.981	2.818	3.981
sub3	2012-07-24	47	1.5	0.48	36	3.853	3.981	5.623	5.012	5.623	3.981	4.467	3.548	3.981	3.162	3.981
sub3	2012-07-24	47	1.5	0.48	36	3.609	3.162	3.981	2.239	2.818	2.512	3.981	3.548	3.981	3.162	4.467
sub3	2012-07-24	47	1.5	0.48	36	4.417	5.012	6.31	3.981	5.623	3.981	4.467	3.981	4.467	3.981	5.623
sub3	2012-07-24	47	1.5	0.48	36	5.493	1.995	2.818	2.512	5.012	4.467	6.31	5.623	7.079	4.467	5.012
sub3	2012-07-24	47	1.5	0.48	36	3.37	3.981	5.012	4.467	5.623	3.162	3.548	3.162	3.548	2.818	3.981
sub3	2012-07-25	47	1.5	0.48	36	1.949	1.995	2.512	1.778	2.818	1.995	2.512	1.585	1.778	1.585	2.239
sub3	2012-07-25	47	1.5	0.48	36	2.223	3.162	4.467	2.818	3.162	2.512	2.818	1.995	2.239	1.778	1.995
sub3	2012-07-25	47	1.5	0.48	36	2.277	2.512	3.162	2.818	3.162	1.585	2.512	1.995	2.818	2.239	2.512
sub3	2012-07-25	47	1.5	0.48	36	2.477	2.512	3.548	2.818	3.162	2.239	2.818	2.239	2.818	2.239	2.512
sub3	2012-07-25	47	1.5	0.48	36	1.581	1.259	2.818	1.995	2.239	1.995	2.239	1.585	1.778	0.891	1
sub3	2012-07-25	47	1.5	0.48	36	1.7	1.585	1.995	1.778	1.995	1.585	1.778	1.585	1.995	1.259	1.995
sub3	2012-07-25	47	1.5	0.48	36	4.019	7.943	5.623	6.31	4.467	5.623	3.981	4.467	3.548	3.981	2.512
sub3	2012-07-25	47	1.5	0.48	36	3.108	3.162	3.981	3.162	3.981	3.548	3.981	2.818	3.548	2.239	2.512
sub3	2012-07-25	47	1.5	0.48	36	2.843	3.162	3.981	3.548	3.981	2.512	3.162	2.818	3.162	2.239	3.162
sub3	2012-07-25	47	1.5	0.48	36	1.377	1.995	2.512	1.995	2.239	1	1.122	1	1.778	1.585	1.778
sub3	2012-07-25	47	1.5	0.48	36	2.375	3.981	5.012	2.239	2.512	2.239	2.512	2.239	2.512	2.239	2.512
sub3	2012-07-25	47	1.5	0.48	36	2.238	1.259	1.778	1.413	1.995	1.778	1.995	1.778	2.818	2.239	2.818
sub3	2012-07-25	47	1.5	0.48	36	2.276	3.981	5.012	3.981	4.467	3.162	3.548	1.585	1.995	1.585	1.778
sub3	2012-07-25	47	1.5	0.48	36	2.35	3.981	5.623	3.162	3.548	2.512	2.818	2.239	2.512	1.778	2.239
sub3	2012-07-25	47	1.5	0.48	36	3.319	5.012	6.31	5.623	6.31	3.548	3.981	3.162	3.548	2.512	3.162
sub3	2012-07-25	47	1.5	0.48	36	2.591	3.162	4.467	3.548	4.467	2.818	3.162	1.995	2.818	2.239	2.512
sub3	2012-07-25	47	1.5	0.48	36	3.507	3.162	3.981	3.548	4.467	3.548	3.981	3.548	3.981	2.818	3.162
sub3	2012-07-26	47	1.5	0.48	36	3.846	3.981	5.012	4.467	5.012	3.548	3.981	3.548	4.467	3.548	3.981
sub3	2012-07-26	47	1.5	0.48	36	3.125	3.162	3.981	3.548	3.981	3.162	3.548	3.162	3.548	2.512	2.818
sub3	2012-07-26	47	1.5	0.48	36	2.4	3.981	5.012	3.981	4.467	2.818	3.162	2.239	2.818	1.585	1.778
sub3	2012-07-26	47	1.5	0.48	36	1.855	1.585	2.239	1.778	1.995	1.778	1.995	1.585	1.995	1.778	1.995
sub3	2012-07-26	47	1.5	0.48	36	3.139	1.585	2.239	1.995	3.162	2.512	2.818	1.995	3.981	3.548	3.981
sub3	2012-07-26	47	1.5	0.48	126	6.095	5.012	6.31	5.623	6.31	5.623	6.31	5.623	7.079	5.623	6.31
sub3	2012-07-26	47	1.5	0.48	126	4.943	7.943	6.31	7.079	6.31	7.079	5.623	7.079	3.162	3.548	3.162
sub3	2012-07-26	47	1.5	0.48	126	4.914	7.943	3.548	4.467	3.162	3.981	3.548	5.623	5.012	6.31	5.012
sub3	2012-07-26	47	1.5	0.48	126	4.124	5.012	6.31	5.012	5.623	5.012	6.31	3.162	3.548	3.162	3.548
sub3	2012-07-26	47	1.5	0.48	126	3.933	3.162	3.981	3.162	3.548	3.162	3.548	2.818	4.467	3.981	5.623
sub4	2012-08-29	47	1.5	0.48	36	5.966	7.943	6.31	7.079	5.012	6.31	5.623	6.31	5.623	6.31	5.623
sub4	2012-08-29	47	1.5	0.48	36	5.369	3.981	6.31	5.012	5.623	4.467	7.943	5.012	5.623	3.548	5.623
sub4	2012-08-29	47	1.5	0.48	36	6.838	7.943	5.623	6.31	5.623	7.943	6.31	7.079	6.31	7.079	6.31
sub4	2012-08-29	47	1.5	0.48	36	5.148	5.012	6.31	3.548	5.623	5.012	5.623	4.467	5.012	4.467	6.31
sub4	2012-08-29	47	1.5	0.48	36	5.533	7.943	5.623	7.943	5.623	7.079	5.623	6.31	5.012	5.623	3.548
sub4	2012-08-29	47	1.5	0.48	36	3.43	2.512	3.162	2.818	3.162	2.512	4.467	2.818	3.981	2.818	3.981
sub4	2012-08-29	47	1.5	0.48	126	5.389	3.981	5.623	5.012	7.079	4.467	5.012	4.467	5.012	4.467	8.913
sub4	2012-08-29	47	1.5	0.48	126	4.459	3.981	5.012	3.981	4.467	3.981	4.467	3.981	4.467	3.548	6.31
sub4	2012-08-29	47	1.5	0.48	126	3.354	2.512	3.162	2.239	2.512	2.239	3.548	3.162	3.548	3.162	4.467
sub4	2012-08-29	47	1.5	0.48	126	4.243	3.981	5.012	4.467	5.012	3.981	4.467	3.548	5.012	3.981	4.467
sub4	2012-08-29	47	1.5	0.48	126	4.224	5.012	6.31	4.467	6.31	3.981	4.467	3.981	4.467	3.981	4.467
sub4	2012-08-29	47	1.5	0.48	126	4.105	3.162	3.981	3.162	3.548	3.162	4.467	3.981	6.31	3.162	3.548
sub4	2012-08-30	47	1.5	0.48	126	5.686	5.012	7.079	6.31	7.079	6.31	7.079	4.467	5.623	5.012	5.623
sub4	2012-08-30	47	1.5	0.48	126	3.326	5.012	6.31	3.981	4.467	3.548	3.981	2.818	3.548	2.512	3.548
sub4	2012-08-30	47	1.5	0.48	126	2.952	3.162	5.012	3.981	4.467	3.162	3.548	2.512	2.818	2.512	3.162
sub4	2012-08-30	47	1.5	0.48	126	3.355	3.981	5.012	4.467	5.012	3.162	3.548	3.162	3.548	3.162	3.548
sub4	2012-08-30	47	1.5	0.48	126	3.004	2.512	3.162	2.818	3.162	2.818	3.162	2.818	3.162	2.512	3.548
sub4	2012-08-30	47	1.5	0.48	126	3.133	3.162	3.981	3.162	3.548	3.162	3.981	2.512	3.162	2.818	3.162
sub4	2012-08-30	47	1.5	0.48	126	3.66	3.981	5.012	3.981	4.467	3.981	4.467	3.548	3.981	2.818	3.162
sub4	2012-08-30	47	1.5	0.48	126	3.043	1.995	3.162	2.818	3.162	2.239	2.512	1.995	3.981	3.548	3.981
sub4	2012-08-30	47	1.5	0.48	126	3.119	3.981	5.012	3.548	3.981	2.818	3.548	2.818	3.548	2.818	3.162
sub4	2012-08-30	47	1.5	0.48	126	3.183	1.585	1.995	1.585	3.162	2.818	3.548	2.818	3.548	2.818	3.548
sub4	2012-08-30	47	1.5	0.48	126	3.628	5.012	6.31	4.467	5.012	3.548	3.981	3.548	3.981	3.162	3.548
sub4	2012-08-30	47	1.5	0.48	126	3.619	3.981	6.31	3.981	4.467	2.818	3.162	2.818	4.467	3.981	4.467
sub4	2012-08-30	47	1.5	0.48	126	3.853	3.981	5.012	4.467	5.012	3.981	4.467	2.512	3.981	3.162	5.012
sub4	2012-08-30	47	1.5	0.48	126	3.145	7.943	5.623	6.31	4.467	5.012	2.512	3.162	2.512	3.162	2.512
sub4	2012-08-30	47	1.5	0.48	126	4.224	3.981	5.012	3.981	4.467	3.981	4.467	3.981	4.467	3.981	4.467
sub4	2012-08-30	47	1.5	0.48	126	3.645	2.512	3.981	3.548	3.981	3.162	3.548	3.162	4.467	3.548	3.981
sub4	2012-08-31	47	1.5	0.48	126	7.362	7.943	6.31	8.913	7.943	8.913	7.943	8.913	6.31	7.079	5.012
sub4	2012-08-31	47	1.5	0.48	126	3.204	10	3.548	3.981	3.548	3.981	2.818	3.548	2.818	3.548	2.512
sub4	2012-08-31	47	1.5	0.48	126	4.487	5.012	6.31	3.548	4.467	3.981	4.467	3.981	5.012	4.467	5.012
sub4	2012-08-31	47	1.5	0.48	126	4.125	3.981	5.012	3.548	4.467	3.548	5.012	4.467	5.012	3.162	3.548
sub4	2012-08-31	47	1.5	0.48	126	3.902	3.162	4.467	3.162	3.981	3.548	5.623	3.548	3.981	3.162	3.548
sub4	2012-08-31	47	1.5	0.48	126	2.717	1.995	3.162	2.818	3.162	2.239	2.512	1.413	3.162	2.512	4.467
sub4	2012-08-31	47	1.5	0.48	126	2.054	7.943	3.162	3.981	1.778	1.995	1.585	2.512	1.995	2.239	1.995
sub4	2012-08-31	47	1.5	0.48	126	2.895	2.512	5.012	2.239	2.818	2.512	2.818	2.512	3.162	2.818	3.548
sub4	2012-08-31	47	1.5	0.48	126	3.298	2.512	3.162	2.512	3.548	3.162	3.548	3.162	3.548	2.818	3.548
sub4	2012-08-31	47	1.5	0.48	126	3.872	3.162	3.981	3.548	5.012	3.981	5.012	3.548	3.981	3.162	3.548
sub4	2012-08-31	47	1.5	0.48	126	3.084	1.585	2.512	1.585	2.818	2.512	2.818	1.995	3.548	3.162	4.467
sub4	2012-08-31	47	1.5	0.48	126	4.243	3.981	5.012	3.981	4.467	3.981	4.467	3.548	5.012	3.981	4.467
sub4	2012-08-31	47	1.5	0.48	126	3.877	3.162	3.981	3.548	3.981	3.548	3.981	2.818	4.467	3.981	4.467
sub4	2012-08-31	47	1.5	0.48	126	2.687	5.012	6.31	5.623	7.079	2.818	3.162	2.512	2.818	1.995	2.818
sub4	2012-08-31	47	1.5	0.48	126	3.37	3.162	3.981	3.548	3.981	2.818	3.548	3.162	3.981	3.162	3.548
sub4	2012-08-31	47	1.5	0.48	126	1.859	5.012	6.31	3.981	5.012	1.778	2.239	1.778	1.995	1.585	1.778
sub4	2012-09-01	47	1.5	0.48	126	4.108	3.162	3.981	3.548	3.981	3.548	3.981	3.548	5.012	3.548	5.012
sub4	2012-09-01	47	1.5	0.48	126	4.487	5.012	6.31	3.162	5.012	4.467	5.012	3.981	4.467	3.981	5.012
sub4	2012-09-01	47	1.5	0.48	126	3.442	3.162	3.981	3.162	3.981	3.548	3.981	3.162	3.981	2.818	3.162
sub4	2012-09-01	47	1.5	0.48	126	3.03	3.981	5.012	2.818	3.162	2.818	3.162	2.239	3.162	2.818	3.981
sub4	2012-09-01	47	1.5	0.48	126	3.304	2.512	3.981	2.818	3.162	2.239	3.162	2.818	3.162	2.818	5.623
sub4	2012-09-01	47	1.5	0.48	126	2.665	5.012	6.31	3.981	4.467	2.512	2.818	2.512	2.818	2.512	2.818
sub4	2012-09-01	47	1.5	0.48	126	3.584	3.981	5.012	4.467	5.012	4.467	5.012	3.981	4.467	1.585	1.995
sub4	2012-09-01	47	1.5	0.48	126	2.699	1.585	2.239	1.995	2.239	1.995	3.162	2.818	3.162	2.239	2.818
sub4	2012-09-01	47	1.5	0.48	126	3.551	1.995	4.467	3.981	5.012	3.981	4.467	3.548	3.981	2.512	2.818
sub4	2012-09-01	47	1.5	0.48	126	2.309	1.995	2.512	2.239	2.818	2.512	2.818	1.778	2.239	1.995	2.512
sub4	2012-09-01	47	1.5	0.48	126	4.097	3.981	5.012	3.548	4.467	3.981	4.467	3.981	5.012	3.162	3.981
sub4	2012-09-01	47	1.5	0.48	126	2.513	2.512	3.162	2.239	2.512	1.778	1.995	1.778	3.548	2.818	3.162
sub4	2012-09-01	47	1.5	0.48	126	3.677	3.981	5.623	2.239	3.162	2.239	2.818	2.512	5.012	4.467	5.012
sub4	2012-09-01	47	1.5	0.48	126	3.557	5.012	6.31	3.548	3.981	3.548	5.012	2.818	3.162	2.818	3.981
sub4	2012-09-01	47	1.5	0.48	126	3.564	3.162	4.467	3.548	3.981	3.162	3.548	3.162	3.981	3.548	3.981
sub4	2012-09-01	47	1.5	0.48	126	4.324	5.012	6.31	5.623	6.31	4.467	5.012	3.981	4.467	3.548	4.467
sub4	2012-09-02	47	1.5	0.48	126	2.888	3.162	3.981	2.818	3.162	2.818	3.162	2.512	3.162	2.512	3.162
sub4	2012-09-02	47	1.5	0.48	126	2.939	3.981	5.012	4.467	5.012	2.512	3.162	2.818	3.162	2.818	3.162
sub4	2012-09-02	47	1.5	0.48	126	2.065	3.162	3.981	1.585	1.995	1.778	2.239	1.778	1.995	1.778	2.818
sub4	2012-09-02	47	1.5	0.48	126	3.165	3.162	3.981	3.548	4.467	3.548	3.981	3.162	3.548	2.239	2.512
sub4	2012-09-02	47	1.5	0.48	126	3.659	3.981	5.012	3.548	5.012	4.467	5.012	2.512	3.162	2.818	3.981
sub4	2012-09-02	47	1.5	0.48	126	2.722	3.981	5.012	2.512	2.818	2.512	2.818	2.512	3.162	2.512	2.818
sub4	2012-09-02	47	1.5	0.48	126	3.079	7.943	4.467	5.012	3.548	4.467	3.162	3.548	2.239	2.818	2.239
sub4	2012-09-02	47	1.5	0.48	126	3.414	2.512	3.162	2.512	2.818	2.512	2.818	2.239	4.467	3.981	4.467
sub4	2012-09-02	47	1.5	0.48	126	2.109	1.585	1.995	1.778	1.995	1.585	2.239	1.778	2.239	1.995	2.818
sub4	2012-09-02	47	1.5	0.48	126	2.375	1.995	2.818	2.239	2.512	2.239	2.512	2.239	2.512	2.239	2.512
sub4	2012-09-02	47	1.5	0.48	126	3.385	3.162	4.467	3.981	4.467	2.818	3.162	2.818	3.981	3.548	3.981
sub4	2012-09-02	47	1.5	0.48	126	3.06	3.981	5.012	2.818	3.548	3.162	3.548	3.162	3.981	1.995	2.512
sub4	2012-09-02	47	1.5	0.48	126	3.039	1	2.239	1.995	2.239	1.995	3.162	2.818	3.548	3.162	3.548
sub4	2012-09-02	47	1.5	0.48	126	2.471	7.943	4.467	5.012	3.162	3.548	2.239	2.512	1.778	2.512	2.239
sub4	2012-09-02	47	1.5	0.48	126	2.523	3.162	4.467	2.239	2.512	2.239	2.512	2.239	2.818	2.512	2.818
sub4	2012-09-02	47	1.5	0.48	126	3.968	7.943	5.012	5.623	3.548	3.981	3.548	4.467	3.981	5.012	2.818
sub4	2012-09-03	47	1.5	0.48	126	4.224	3.162	3.981	3.162	4.467	3.981	4.467	3.981	4.467	3.981	4.467
sub4	2012-09-03	47	1.5	0.48	126	3.184	5.012	6.31	3.162	3.548	3.162	3.981	2.818	3.162	2.818	3.162
sub4	2012-09-03	47	1.5	0.48	126	2.282	5.012	6.31	2.818	3.162	1.585	2.239	1.995	2.818	2.239	2.818
sub4	2012-09-03	47	1.5	0.48	126	2.809	2.512	3.981	2.818	3.548	2.818	3.548	1.995	2.818	2.512	3.162
sub4	2012-09-03	47	1.5	0.48	126	2.568	7.943	5.623	6.31	3.162	3.548	1.778	2.512	2.239	2.818	2.512
sub4	2012-09-03	47	1.5	0.48	126	3.353	5.012	6.31	3.162	3.548	2.239	3.548	2.818	3.981	3.548	3.981
sub4	2012-09-03	47	1.5	0.48	126	3.798	7.943	3.981	4.467	3.981	4.467	3.981	4.467	3.162	3.548	3.162
sub4	2012-09-03	47	1.5	0.48	126	2.844	3.162	4.467	3.162	3.981	2.512	3.548	2.512	3.162	2.512	2.818
sub4	2012-09-03	47	1.5	0.48	126	1.927	2.512	3.548	2.512	2.818	1.778	2.239	1.778	1.995	1.778	1.995
sub4	2012-09-03	47	1.5	0.48	126	2.507	3.981	5.012	3.162	3.981	3.162	3.548	1.585	2.512	1.995	2.239
sub4	2012-09-03	47	1.5	0.48	126	3.391	3.981	5.012	3.981	4.467	3.162	3.981	3.162	3.548	2.512	3.981
sub4	2012-09-03	47	1.5	0.48	126	2.907	3.981	5.012	3.162	3.548	3.162	3.548	2.818	3.162	2.239	2.512
sub4	2012-09-03	47	1.5	0.48	126	2.294	2.512	3.162	2.239	2.818	1.995	2.512	2.239	2.512	1.995	2.512
sub4	2012-09-03	47	1.5	0.48	126	3.42	2.512	3.162	2.512	3.162	2.818	3.162	2.818	3.548	3.162	5.012
sub4	2012-09-03	47	1.5	0.48	126	2.85	2.512	3.162	2.818	3.981	3.162	3.548	2.239	2.818	2.512	2.818
sub4	2012-09-03	47	1.5	0.48	126	2.481	1.585	2.239	1.778	2.239	1.585	1.995	1.778	3.162	2.818	3.548
sub4	2012-09-04	47	1.5	0.48	36	4.121	7.943	5.623	7.079	4.467	5.012	3.981	4.467	2.818	4.467	3.981
sub4	2012-09-04	47	1.5	0.48	36	5.318	3.981	5.623	5.012	5.623	5.012	5.623	5.012	5.623	5.012	5.623
sub4	2012-09-04	47	1.5	0.48	36	3.7	3.162	3.981	2.818	3.548	3.162	3.981	3.548	3.981	3.548	3.981
sub4	2012-09-04	47	1.5	0.48	36	3.918	3.981	5.012	4.467	5.623	3.981	4.467	3.548	3.981	3.548	3.981
sub4	2012-09-04	47	1.5	0.48	36	4.324	3.162	4.467	3.548	5.012	4.467	5.012	3.981	4.467	3.548	4.467
sub4	2012-09-04	47	1.5	0.48	126	3.398	3.981	5.012	4.467	5.012	3.548	3.981	3.548	3.981	2.512	2.818
sub4	2012-09-04	47	1.5	0.48	126	3.37	3.162	3.981	2.512	3.162	2.818	3.981	3.162	3.548	3.162	3.548
sub4	2012-09-04	47	1.5	0.48	126	1.972	2.512	3.162	2.239	2.512	1.778	1.995	1.585	2.239	1.995	2.239
sub4	2012-09-04	47	1.5	0.48	126	1.887	2.512	3.162	2.512	3.162	1.778	1.995	1.778	1.995	1.778	1.995
sub4	2012-09-04	47	1.5	0.48	126	3.248	2.512	3.162	2.818	3.162	2.818	3.162	2.818	3.548	3.162	3.981
sub5	2012-08-29	47	1.5	0.48	36	6.107	5.012	7.943	6.31	7.943	6.31	7.079	5.623	6.31	5.012	6.31
sub5	2012-08-29	47	1.5	0.48	36	3.112	5.012	6.31	5.012	5.623	3.162	3.548	2.818	3.162	2.818	3.162
sub5	2012-08-29	47	1.5	0.48	36	3.434	3.981	5.623	4.467	5.012	3.548	3.981	3.162	3.548	2.818	3.548
sub5	2012-08-29	47	1.5	0.48	36	4.847	10	7.079	7.943	5.012	6.31	3.981	4.467	3.548	6.31	4.467
sub5	2012-08-29	47	1.5	0.48	36	2.631	2.512	3.162	2.512	2.818	2.512	2.818	2.239	2.818	2.239	3.162
sub5	2012-08-29	47	1.5	0.48	36	5.557	5.012	6.31	5.623	7.079	5.623	6.31	5.012	5.623	4.467	6.31
sub5	2012-08-29	47	1.5	0.48	126	7.578	7.943	6.31	8.913	7.943	8.913	7.943	8.913	6.31	7.079	6.31
sub5	2012-08-29	47	1.5	0.48	126	5.686	5.012	7.079	5.623	6.31	5.623	7.079	4.467	6.31	5.012	5.623
sub5	2012-08-29	47	1.5	0.48	126	3.234	7.943	3.548	3.981	2.818	3.162	2.818	3.548	3.162	3.548	3.162
sub5	2012-08-29	47	1.5	0.48	126	4.658	3.981	6.31	5.623	6.31	4.467	5.012	3.981	5.012	4.467	5.012
sub5	2012-08-29	47	1.5	0.48	126	2.626	3.981	5.012	2.239	2.818	2.512	2.818	2.512	3.162	2.239	2.512
sub5	2012-08-29	47	1.5	0.48	126	5.672	10	4.467	5.012	3.981	6.31	5.623	6.31	4.467	6.31	5.012
sub5	2012-08-30	47	1.5	0.48	126	5.966	5.012	7.079	6.31	10	5.623	6.31	5.623	6.31	5.623	6.31
sub5	2012-08-30	47	1.5	0.48	126	4.414	5.012	6.31	3.548	3.981	3.548	4.467	3.981	5.012	4.467	5.012
sub5	2012-08-30	47	1.5	0.48	126	2.745	3.981	5.012	3.162	3.981	2.818	3.162	2.512	2.818	1.995	3.162
sub5	2012-08-30	47	1.5	0.48	126	4.345	5.012	7.079	3.548	3.981	3.548	4.467	3.981	4.467	3.981	5.623
sub5	2012-08-30	47	1.5	0.48	126	4.224	7.943	3.548	3.981	3.162	4.467	3.981	4.467	3.981	4.467	3.981
sub5	2012-08-30	47	1.5	0.48	126	3.934	10	3.981	4.467	3.981	4.467	3.981	4.467	3.162	3.981	3.548
sub5	2012-08-30	47	1.5	0.48	126	5.096	7.943	5.623	6.31	5.623	7.079	5.623	6.31	3.548	4.467	3.548
sub5	2012-08-30	47	1.5	0.48	126	5.648	7.943	6.31	7.079	5.623	6.31	5.623	6.31	5.012	5.623	5.012
sub5	2012-08-30	47	1.5	0.48	126	2.648	3.981	5.012	3.162	3.548	2.818	3.162	2.512	3.162	1.995	2.239
sub5	2012-08-30	47	1.5	0.48	126	3.5	1.995	2.818	2.512	2.818	2.512	3.981	3.548	3.981	2.512	4.467
sub5	2012-08-30	47	1.5	0.48	126	3.798	3.981	5.012	3.981	4.467	3.162	3.548	3.162	4.467	3.981	4.467
sub5	2012-08-30	47	1.5	0.48	126	3.492	3.162	5.012	4.467	5.012	3.981	5.012	2.818	3.162	2.818	3.162
sub5	2012-08-30	47	1.5	0.48	126	3.918	3.981	5.012	3.981	4.467	3.981	4.467	3.548	3.981	3.548	3.981
sub5	2012-08-30	47	1.5	0.48	126	4.679	5.012	6.31	5.012	5.623	5.012	5.623	3.981	4.467	3.981	5.012
sub5	2012-08-30	47	1.5	0.48	126	2.507	1.995	2.818	2.512	2.818	1.995	2.512	2.239	2.512	2.239	3.548
sub5	2012-08-30	47	1.5	0.48	126	3.112	3.162	3.981	3.162	3.548	3.162	3.548	2.818	3.162	2.818	3.162
sub5	2012-08-31	47	1.5	0.48	126	4.315	3.162	3.981	2.818	4.467	3.981	4.467	3.981	4.467	3.981	5.012
sub5	2012-08-31	47	1.5	0.48	126	1.811	1	1.995	1.778	1.995	1.585	1.995	1.413	1.778	1.585	2.512
sub5	2012-08-31	47	1.5	0.48	126	2.77	3.162	3.981	3.162	3.548	3.162	3.548	2.512	3.162	1.995	2.239
sub5	2012-08-31	47	1.5	0.48	126	3.061	3.162	3.981	3.162	3.548	3.162	3.548	2.512	3.162	2.818	3.162
sub5	2012-08-31	47	1.5	0.48	126	3.248	3.981	5.623	3.981	5.012	3.162	3.981	2.818	3.162	2.818	3.548
sub5	2012-08-31	47	1.5	0.48	126	4.35	5.012	6.31	5.623	6.31	4.467	5.012	4.467	5.012	3.162	3.981
sub5	2012-08-31	47	1.5	0.48	126	3.492	5.012	6.31	4.467	5.012	3.548	3.981	3.162	3.548	3.162	3.548
sub5	2012-08-31	47	1.5	0.48	126	2.856	2.512	3.162	2.239	2.512	2.239	3.162	2.512	3.162	2.512	3.548
sub5	2012-08-31	47	1.5	0.48	126	2.99	3.162	3.981	2.512	3.162	2.818	3.981	1.995	3.162	2.818	3.162
sub5	2012-08-31	47	1.5	0.48	126	4.688	3.162	4.467	3.548	3.981	3.548	5.623	4.467	5.012	4.467	5.012
sub5	2012-08-31	47	1.5	0.48	126	5.125	3.981	5.623	5.012	5.623	5.012	5.623	5.012	5.623	4.467	5.012
sub5	2012-08-31	47	1.5	0.48	126	2.1	3.981	5.623	3.548	3.981	2.818	3.162	1.585	1.778	1.259	1.995
sub5	2012-08-31	47	1.5	0.48	126	2.426	3.162	5.623	3.162	3.981	2.239	2.512	2.239	2.818	2.239	2.512
sub5	2012-08-31	47	1.5	0.48	126	4.333	5.012	6.31	4.467	5.012	3.981	4.467	3.548	5.012	3.981	5.012
sub5	2012-08-31	47	1.5	0.48	126	2.734	2.512	3.162	2.818	3.162	2.512	3.162	2.512	2.818	2.239	3.162
sub5	2012-08-31	47	1.5	0.48	126	3.645	3.162	4.467	3.981	4.467	3.981	4.467	3.162	3.548	3.162	3.548
sub5	2012-09-01	47	1.5	0.48	126	4.17	3.981	5.623	4.467	5.012	4.467	5.012	3.548	3.981	3.548	4.467
sub5	2012-09-01	47	1.5	0.48	126	4.09	7.943	5.623	6.31	3.162	3.981	3.548	4.467	3.981	5.012	3.548
sub5	2012-09-01	47	1.5	0.48	126	4.67	7.943	5.623	6.31	5.012	6.31	5.012	5.623	3.548	3.981	3.548
sub5	2012-09-01	47	1.5	0.48	126	2.844	2.512	3.548	2.512	2.818	2.512	2.818	2.512	3.548	2.512	3.162
sub5	2012-09-01	47	1.5	0.48	126	3.66	3.981	5.012	3.981	4.467	3.981	4.467	3.548	3.981	2.818	3.162
sub5	2012-09-01	47	1.5	0.48	126	3.5	3.162	4.467	2.512	3.548	3.162	3.981	3.162	3.981	3.162	3.548
sub5	2012-09-01	47	1.5	0.48	126	4.952	3.981	5.012	3.981	4.467	2.818	5.623	5.012	5.623	5.012	5.623
sub5	2012-09-01	47	1.5	0.48	126	3.7	5.012	6.31	4.467	5.012	3.548	3.981	3.548	3.981	3.162	3.981
sub5	2012-09-01	47	1.5	0.48	126	2.758	3.981	5.012	2.512	3.548	2.512	3.162	2.818	3.548	1.995	2.512
sub5	2012-09-01	47	1.5	0.48	126	2.282	7.943	2.239	2.818	2.239	2.818	2.239	2.818	1.585	2.239	1.995
sub5	2012-09-01	47	1.5	0.48	126	3.523	3.981	5.012	3.548	5.623	3.548	3.981	3.162	4.467	2.818	3.162
sub5	2012-09-01	47	1.5	0.48	126	4.417	3.981	5.012	4.467	5.012	3.981	4.467	3.981	4.467	3.981	5.623
sub5	2012-09-01	47	1.5	0.48	126	3.116	3.162	4.467	2.512	3.548	3.162	3.981	2.818	3.981	2.239	2.512
sub5	2012-09-01	47	1.5	0.48	126	4.817	5.012	6.31	3.548	3.981	3.162	5.623	5.012	5.623	4.467	5.012
sub5	2012-09-01	47	1.5	0.48	126	3.492	3.981	5.012	4.467	5.012	3.548	3.981	3.162	3.548	3.162	3.548
sub5	2012-09-01	47	1.5	0.48	126	3.055	2.512	3.548	3.162	3.548	2.818	3.162	2.818	3.162	2.818	3.548
sub5	2012-09-02	47	1.5	0.48	126	3.846	3.981	5.012	3.548	3.981	3.548	3.981	3.548	4.467	3.548	3.981
sub5	2012-09-02	47	1.5	0.48	126	3.999	3.981	5.623	3.548	3.981	3.548	3.981	3.548	4.467	3.981	4.467
sub5	2012-09-02	47	1.5	0.48	126	3.382	3.981	5.012	3.981	4.467	3.548	4.467	3.548	3.981	2.239	2.512
sub5	2012-09-02	47	1.5	0.48	126	3.427	5.012	6.31	2.818	5.012	3.162	3.981	3.162	3.548	3.162	3.548
sub5	2012-09-02	47	1.5	0.48	126	1.721	1.585	1.995	1.259	2.239	1.778	1.995	1.413	1.778	1.585	1.778
sub5	2012-09-02	47	1.5	0.48	126	3.645	3.981	5.012	3.981	4.467	3.981	4.467	3.162	3.548	3.162	3.548
sub5	2012-09-02	47	1.5	0.48	126	3.248	5.012	6.31	5.623	6.31	3.162	3.548	2.818	3.981	2.818	3.162
sub5	2012-09-02	47	1.5	0.48	126	4.087	3.162	3.981	3.548	3.981	3.162	4.467	3.981	4.467	3.981	4.467
sub5	2012-09-02	47	1.5	0.48	126	5.34	2.512	3.162	2.818	3.548	3.162	6.31	5.623	6.31	5.012	5.623
sub5	2012-09-02	47	1.5	0.48	126	3.645	2.512	3.548	3.162	3.981	3.548	3.981	3.162	4.467	3.162	3.548
sub5	2012-09-02	47	1.5	0.48	126	3.08	7.943	3.548	3.981	2.818	3.548	3.162	3.548	2.818	3.162	2.239
sub5	2012-09-02	47	1.5	0.48	126	1.859	1.995	2.512	2.239	2.512	1.778	2.239	1.778	1.995	1.585	1.778
sub5	2012-09-02	47	1.5	0.48	126	3.853	2.512	5.623	3.981	4.467	3.981	4.467	3.548	3.981	3.162	3.981
sub5	2012-09-02	47	1.5	0.48	126	2.482	5.012	6.31	3.548	4.467	2.512	2.818	2.512	2.818	1.995	2.239
sub5	2012-09-02	47	1.5	0.48	126	3.442	2.512	3.162	2.512	3.162	2.818	3.981	3.162	3.548	3.162	3.981
sub5	2012-09-02	47	1.5	0.48	126	2.3	1.995	2.818	2.512	2.818	1.995	2.239	1.995	2.512	2.239	2.818
sub5	2012-09-03	47	1.5	0.48	126	2.895	1.995	2.818	2.512	2.818	2.512	2.818	2.512	3.162	2.818	3.548
sub5	2012-09-03	47	1.5	0.48	126	3.564	2.512	3.162	2.239	3.548	3.162	3.548	3.162	3.981	3.548	3.981
sub5	2012-09-03	47	1.5	0.48	126	2.952	2.512	3.548	2.818	3.981	2.512	3.162	2.512	3.162	2.818	3.548
sub5	2012-09-03	47	1.5	0.48	126	3.678	3.981	5.012	3.981	4.467	3.981	5.623	3.981	4.467	1.778	2.239
sub5	2012-09-03	47	1.5	0.48	126	3.125	3.981	5.012	3.162	3.548	2.512	3.548	3.162	3.548	2.818	3.162
sub5	2012-09-03	47	1.5	0.48	126	2.667	3.162	3.981	3.162	3.981	3.162	3.548	2.239	2.818	1.995	2.239
sub5	2012-09-03	47	1.5	0.48	126	2.249	3.162	3.981	2.512	2.818	2.239	2.512	1.995	2.239	1.995	2.512
sub5	2012-09-03	47	1.5	0.48	126	4.162	5.012	6.31	3.548	4.467	3.981	5.012	3.981	4.467	3.548	3.981
sub5	2012-09-03	47	1.5	0.48	126	2.808	1.995	2.512	1.995	2.239	1.995	2.512	1.995	3.548	2.818	3.981
sub5	2012-09-03	47	1.5	0.48	126	2.386	3.981	5.012	4.467	5.012	2.512	2.818	2.239	2.512	1.995	2.239
sub5	2012-09-03	47	1.5	0.48	126	2.906	3.162	4.467	2.239	2.512	1.995	2.512	2.239	3.981	3.162	3.548
sub5	2012-09-03	47	1.5	0.48	126	4.243	3.981	5.012	3.981	4.467	3.981	4.467	3.981	5.012	3.548	4.467
sub5	2012-09-03	47	1.5	0.48	126	2.785	3.981	5.012	2.512	3.162	2.818	3.162	2.512	2.818	2.239	3.162
sub5	2012-09-03	47	1.5	0.48	126	2.986	5.012	7.079	3.162	3.548	2.818	3.548	2.239	2.818	2.512	3.981
sub5	2012-09-03	47	1.5	0.48	126	1.794	3.162	4.467	3.162	3.548	1.585	1.995	1.778	1.995	1.413	1.995
sub5	2012-09-03	47	1.5	0.48	126	2.494	5.012	6.31	3.548	3.981	1.585	2.239	1.995	3.162	2.818	3.162
sub5	2012-09-04	47	1.5	0.48	36	3.125	3.162	3.981	3.548	3.981	3.162	3.548	2.818	3.548	2.512	3.162
sub5	2012-09-04	47	1.5	0.48	36	3.626	7.943	6.31	7.079	5.012	5.623	2.239	3.548	2.818	3.981	3.548
sub5	2012-09-04	47	1.5	0.48	36	2.09	2.512	3.162	1.995	2.512	2.239	2.512	1.778	2.239	1.778	1.995
sub5	2012-09-04	47	1.5	0.48	36	2.753	7.943	4.467	5.012	3.162	3.548	2.239	2.818	2.239	3.162	2.512
sub5	2012-09-04	47	1.5	0.48	36	2.35	7.943	4.467	5.623	2.239	2.512	1.778	2.512	2.239	2.818	2.239
sub5	2012-09-04	47	1.5	0.48	126	2.081	5.012	6.31	2.239	2.512	1.778	2.239	1.995	2.239	1.995	2.239
sub5	2012-09-04	47	1.5	0.48	126	2.117	7.943	2.818	3.162	1.995	2.239	1.995	2.239	1.995	2.239	1.995
sub5	2012-09-04	47	1.5	0.48	126	3.06	3.162	3.981	3.548	3.981	3.162	4.467	2.818	3.162	2.239	2.512
sub5	2012-09-04	47	1.5	0.48	126	2.477	2.512	3.548	2.818	3.548	2.239	2.818	2.239	2.818	2.239	2.512
sub5	2012-09-04	47	1.5	0.48	126	2.699	3.981	5.012	4.467	5.012	2.818	3.162	2.818	3.162	1.995	2.239
sub6	2012-08-30	47	1.5	0.48	36	1.628	7.943	1.778	1.995	1.778	1.995	1.413	1.585	1.413	1.778	1.585
sub6	2012-08-30	47	1.5	0.48	36	3.298	3.162	3.981	3.548	3.981	3.162	3.548	2.818	3.548	3.162	3.548
sub6	2012-08-30	47	1.5	0.48	36	2.907	2.512	3.162	2.818	3.548	3.162	3.548	2.818	3.162	2.239	2.512
sub6	2012-08-30	47	1.5	0.48	36	3.37	3.162	3.981	3.162	3.548	3.162	3.548	2.818	3.981	3.162	3.548
sub6	2012-08-30	47	1.5	0.48	36	1.989	2.512	3.162	1.995	2.239	1.995	2.239	1.778	1.995	1.413	2.512
sub6	2012-08-30	47	1.5	0.48	36	2.792	1.995	3.981	3.548	3.981	2.818	3.548	2.239	2.818	2.512	2.818
sub6	2012-08-30	47	1.5	0.48	126	2.453	7.943	5.012	5.623	3.548	3.981	1.995	2.239	1.995	2.512	1.995
sub6	2012-08-30	47	1.5	0.48	126	3.853	5.012	6.31	4.467	5.012	3.981	4.467	3.162	3.981	3.548	3.981
sub6	2012-08-30	47	1.5	0.48	126	1.045	3.162	3.981	1.995	2.239	1	1.259	1	1.122	0.891	1
sub6	2012-08-30	47	1.5	0.48	126	2.62	1.995	2.512	2.239	2.818	2.239	2.818	2.512	2.818	2.512	2.818
sub6	2012-08-30	47	1.5	0.48	126	1.227	0.794	1.122	0.794	1	0.891	1	0.891	1.585	1.413	1.585
sub6	2012-08-30	47	1.5	0.48	126	3.067	3.981	5.012	3.548	3.981	3.548	3.981	2.512	2.818	1.995	3.548
sub6	2012-08-31	47	1.5	0.48	36	3.139	7.943	3.981	4.467	3.162	3.548	3.162	3.981	2.818	3.548	1.778
sub6	2012-08-31	47	1.5	0.48	36	2.85	7.943	1.995	2.818	2.512	3.548	2.818	3.162	2.512	2.818	2.239
sub6	2012-08-31	47	1.5	0.48	36	0.85	0.631	0.794	0.631	0.708	0.447	0.501	0.447	0.562	0.501	0.708
sub6	2012-08-31	47	1.5	0.48	36	3.918	5.012	6.31	3.981	4.467	3.981	4.467	3.548	3.981	3.548	3.981
sub6	2012-08-31	47	1.5	0.48	36	2.081	5.012	6.31	2.512	2.818	1.995	2.239	1.778	2.239	1.995	2.239
sub6	2012-08-31	47	1.5	0.48	36	1.428	1.995	2.512	2.239	2.512	1.778	1.995	1.259	1.413	1	1.122
sub6	2012-08-31	47	1.5	0.48	36	2.077	5.012	6.31	2.512	2.818	2.512	2.818	2.239	2.512	1.122	1.259
sub6	2012-08-31	47	1.5	0.48	36	1.161	1.259	1.585	1.413	1.585	1.122	1.413	1.122	1.259	0.794	1.259
sub6	2012-08-31	47	1.5	0.48	36	0.85	1.259	1.585	1	1.122	0.891	1	0.708	0.794	0.562	0.708
sub6	2012-08-31	47	1.5	0.48	36	1.425	1	1.413	1.259	1.413	1.259	1.585	1.413	1.585	1.122	1.585
sub6	2012-08-31	47	1.5	0.48	36	1.895	1.995	2.512	1.413	1.778	1.585	1.995	1.778	2.239	1.778	1.995
sub6	2012-08-31	47	1.5	0.48	36	2.442	3.162	3.981	1.995	2.239	1.995	2.512	1.995	2.818	2.512	2.818
sub6	2012-08-31	47	1.5	0.48	36	2.335	10	2.239	2.512	1.778	2.512	2.239	2.512	2.239	2.512	1.995
sub6	2012-08-31	47	1.5	0.48	36	2.403	1.585	2.512	1.778	3.548	2.512	3.162	1.995	2.512	1.995	2.239
sub6	2012-09-01	47	1.5	0.48	36	1.086	2.512	3.162	1.413	1.778	1.122	1.259	1	1.122	0.891	1.122
sub6	2012-09-01	47	1.5	0.48	36	1.534	1.995	2.512	2.239	3.548	1.585	1.778	1.259	1.585	1.413	1.585
sub6	2012-09-01	47	1.5	0.48	36	1.834	1.995	2.512	1.995	2.512	1.995	2.239	1.585	1.778	1.413	1.995
sub6	2012-09-01	47	1.5	0.48	36	2.32	2.512	3.162	1.585	1.778	1.585	1.778	1.413	3.162	2.818	3.162
sub6	2012-09-01	47	1.5	0.48	36	2.003	2.512	3.548	2.818	3.162	2.818	3.162	1.259	1.778	1.413	1.585
sub6	2012-09-01	47	1.5	0.48	36	1.66	1.585	1.995	1.413	1.778	1.585	1.778	1.413	1.995	1.413	1.778
sub6	2012-09-01	47	1.5	0.48	36	2.764	2.512	3.162	2.239	2.512	2.239	3.548	2.818	3.162	1.995	2.818
sub6	2012-09-01	47	1.5	0.48	36	3.061	3.162	3.981	3.548	3.981	3.162	3.548	2.512	3.162	2.818	3.162
sub6	2012-09-01	47	1.5	0.48	36	3.587	2.512	3.162	2.818	3.548	2.818	3.548	3.162	3.981	3.548	4.467
sub6	2012-09-01	47	1.5	0.48	36	2.214	1.585	2.512	2.239	2.512	1.995	2.239	1.995	2.239	1.995	2.818
sub6	2012-09-01	47	1.5	0.48	36	1.411	1.995	2.512	1.585	1.778	1.585	1.778	1.259	1.585	1	1.259
sub6	2012-09-01	47	1.5	0.48	36	3.564	5.012	7.079	3.548	3.981	3.548	3.981	3.162	3.548	3.162	3.981
sub6	2012-09-01	47	1.5	0.48	36	4.76	5.012	6.31	5.012	5.623	5.012	5.623	4.467	5.012	3.981	4.467
sub6	2012-09-01	47	1.5	0.48	36	3.225	10	5.012	5.623	3.162	3.981	3.548	3.981	2.512	2.818	2.512
sub6	2012-09-01	47	1.5	0.48	36	2.859	2.512	3.548	2.818	3.548	2.512	3.981	2.512	2.818	2.512	2.818
sub6	2012-09-01	47	1.5	0.48	36	2.117	1.995	2.512	1.995	2.239	1.995	2.239	1.995	2.239	1.995	2.239
sub6	2012-09-02	47	1.5	0.48	36	3.645	5.012	6.31	3.981	4.467	3.981	4.467	3.162	3.548	3.162	3.548
sub6	2012-09-02	47	1.5	0.48	36	2.548	3.981	5.012	3.981	4.467	2.239	2.512	2.239	3.548	2.239	2.512
sub6	2012-09-02	47	1.5	0.48	36	2.752	3.981	5.012	2.239	3.548	2.818	3.548	1.995	2.818	2.512	2.818
sub6	2012-09-02	47	1.5	0.48	36	1.244	1.585	2.239	1	1.585	1.122	1.259	1	1.413	1.259	1.413
sub6	2012-09-02	47	1.5	0.48	36	2.99	2.512	3.548	2.512	3.162	2.818	3.162	2.818	3.162	2.818	3.162
sub6	2012-09-02	47	1.5	0.48	36	3.368	3.981	5.012	4.467	5.012	4.467	5.012	2.818	3.162	2.239	2.512
sub6	2012-09-02	47	1.5	0.48	36	1.224	1.259	1.585	1.122	1.259	1	1.259	1.122	1.259	1.122	1.585
sub6	2012-09-02	47	1.5	0.48	36	1.173	1.995	2.818	2.239	2.818	1.585	1.778	0.708	1	0.708	1.259
sub6	2012-09-02	47	1.5	0.48	36	2.176	3.981	5.012	2.818	3.548	1.778	2.512	2.239	2.512	1.778	2.239
sub6	2012-09-02	47	1.5	0.48	36	1.769	3.162	3.981	2.239	3.162	2.239	2.512	1.413	1.778	1.259	1.413
sub6	2012-09-02	47	1.5	0.48	36	2.631	3.162	5.012	3.981	4.467	2.818	3.162	2.239	2.818	2.239	2.512
sub6	2012-09-02	47	1.5	0.48	36	1.927	2.512	3.162	1.413	2.239	1.778	1.995	1.778	2.239	1.778	1.995
sub6	2012-09-02	47	1.5	0.48	36	2.057	1.995	2.818	1.778	2.239	1.413	1.778	1.585	2.818	2.239	2.512
sub6	2012-09-02	47	1.5	0.48	36	2.264	5.012	7.079	2.818	3.162	2.239	2.818	2.239	2.512	1.778	1.995
sub6	2012-09-02	47	1.5	0.48	36	2.204	3.162	3.981	2.818	3.162	2.512	3.162	1.778	1.995	1.778	1.995
sub6	2012-09-02	47	1.5	0.48	36	2.375	3.981	5.012	2.818	3.162	2.239	2.512	2.239	2.512	2.239	2.512
sub6	2012-09-03	47	1.5	0.48	36	1.013	1.585	1.995	1.259	1.413	1.122	1.259	0.891	1.122	0.794	0.891
sub6	2012-09-03	47	1.5	0.48	36	1.342	1.995	2.512	1.778	2.818	1.259	1.413	1.122	1.413	1.259	1.585
sub6	2012-09-03	47	1.5	0.48	36	2.017	1.585	2.818	2.239	2.512	1.122	2.239	1.995	2.512	1.995	2.239
sub6	2012-09-03	47	1.5	0.48	36	1.625	1.585	2.512	1.995	2.239	1.995	2.239	1.259	1.413	1.259	1.585
sub6	2012-09-03	47	1.5	0.48	36	2.017	1.585	1.995	1.778	2.512	1.995	2.239	1.995	2.512	1.585	1.778
sub6	2012-09-03	47	1.5	0.48	36	2.386	1.995	2.818	2.512	2.818	2.512	2.818	2.239	2.512	1.995	2.239
sub6	2012-09-03	47	1.5	0.48	36	1.818	7.943	1.778	2.239	1.778	2.239	1.778	1.995	1.778	1.995	1.122
sub6	2012-09-03	47	1.5	0.48	36	0.85	1.995	2.512	1.585	1.778	1.122	1.259	0.631	0.708	0.562	0.794
sub6	2012-09-03	47	1.5	0.48	36	1.348	1.995	2.512	2.239	2.512	1.413	1.995	1.413	1.585	0.794	0.891
sub6	2012-09-03	47	1.5	0.48	36	3.415	2.512	3.162	2.512	2.818	2.512	3.162	2.818	4.467	3.548	3.981
sub6	2012-09-03	47	1.5	0.48	36	1.606	3.162	3.981	2.512	2.818	1.778	1.995	1.413	1.778	1.259	1.413
sub6	2012-09-03	47	1.5	0.48	36	1.061	1.259	1.585	1.413	1.585	1.413	1.585	0.794	0.891	0.794	0.891
sub6	2012-09-03	47	1.5	0.48	36	1.457	2.512	3.162	1.995	2.512	1.585	1.778	1.413	1.585	1.122	1.259
sub6	2012-09-03	47	1.5	0.48	36	1.927	2.512	3.162	2.239	2.512	1.778	1.995	1.778	2.239	1.778	1.995
sub6	2012-09-03	47	1.5	0.48	36	1.903	3.162	3.981	2.239	2.818	2.239	2.818	1.585	1.778	1.413	1.585
sub6	2012-09-03	47	1.5	0.48	36	2.58	1.995	2.512	2.239	2.512	2.239	3.162	2.512	2.818	2.239	2.512
sub6	2012-09-05	47	1.5	0.48	36	1.48	1.259	1.778	1.259	1.413	1.259	1.585	1.413	1.585	1.259	1.778
sub6	2012-09-05	47	1.5	0.48	36	1.273	3.162	3.981	1	1.259	1.122	1.413	1.259	1.585	1	1.259
sub6	2012-09-05	47	1.5	0.48	36	1.437	1.585	1.995	1.778	1.995	1.585	1.778	1.259	1.413	1	1.585
sub6	2012-09-05	47	1.5	0.48	36	1.419	1.995	2.512	1.778	2.512	2.239	2.512	1	1.259	0.708	0.794
sub6	2012-09-05	47	1.5	0.48	36	1.689	1.259	1.585	1.413	1.778	1.413	1.995	1.585	1.778	1.585	1.778
sub6	2012-09-05	47	1.5	0.48	36	1.39	1.585	1.995	1.413	1.585	1.413	1.585	1.259	1.413	1.259	1.413
sub6	2012-09-05	47	1.5	0.48	36	1.034	7.943	3.981	4.467	1.778	1.995	0.794	0.891	0.631	1	0.891
sub6	2012-09-05	47	1.5	0.48	36	1.628	5.012	6.31	2.239	2.818	1.778	1.995	1.413	1.585	1.413	1.585
sub6	2012-09-05	47	1.5	0.48	36	0.943	1	1.259	1	1.122	0.794	1.122	0.794	0.891	0.794	1.259
sub6	2012-09-05	47	1.5	0.48	36	1.757	2.512	3.162	2.512	2.818	1.778	1.995	1.778	1.995	1.413	1.585
sub6	2012-09-05	47	1.5	0.48	36	0.85	1	1.259	0.891	1	0.631	1	0.891	1	0.562	0.794
sub6	2012-09-05	47	1.5	0.48	36	2.345	1.995	2.818	2.512	2.818	2.512	2.818	1.995	2.512	1.995	2.239
sub6	2012-09-05	47	1.5	0.48	36	1.907	3.162	4.467	3.981	4.467	3.162	3.981	0.891	1.259	0.891	1.259
sub6	2012-09-05	47	1.5	0.48	36	2.289	3.981	5.012	3.162	3.548	2.239	2.512	2.239	2.512	1.995	2.239
sub6	2012-09-06	47	1.5	0.48	36	1.595	1.995	2.512	1.995	2.239	1.585	1.778	1.585	1.778	1.259	1.585
sub6	2012-09-06	47	1.5	0.48	36	0.886	1.585	1.995	1.259	1.413	1.259	1.413	0.794	0.891	0.398	0.562
sub6	2012-09-06	47	1.5	0.48	36	1.282	1.259	1.585	1.413	1.585	1.122	1.413	1.259	1.778	1	1.122
sub6	2012-09-06	47	1.5	0.48	36	0.955	0.631	0.891	0.708	0.891	0.708	0.794	0.708	1.259	1	1.259
sub6	2012-09-06	47	1.5	0.48	36	0.913	2.512	3.162	0.891	1.122	0.794	1	0.794	1	0.891	1
sub6	2012-09-06	47	1.5	0.48	126	2.866	3.981	5.012	3.162	3.548	3.162	3.548	3.162	3.548	1.778	1.995
sub6	2012-09-06	47	1.5	0.48	126	1.718	1.259	2.239	1.585	1.778	1.585	1.995	1.585	1.778	1.585	1.778
sub6	2012-09-06	47	1.5	0.48	126	2.04	3.162	3.981	2.818	3.162	1.995	2.239	1.995	2.239	1.778	1.995
sub6	2012-09-06	47	1.5	0.48	126	2.457	5.012	6.31	2.818	3.162	1.778	2.239	1.585	3.162	2.818	3.162
sub6	2012-09-06	47	1.5	0.48	126	2.809	3.162	4.467	3.981	4.467	3.162	3.548	1.995	2.818	2.512	2.818
sub7	2007-08-27	47	1.5	0.48	36	2.37158	12.589	2.512	3.162	2.239	2.512	2.239	2.512	2.239	2.512	2.239
sub7	2007-08-27	47	1.5	0.48	36	3.41435	12.589	3.981	4.467	3.548	4.467	2.818	3.548	3.162	3.548	3.162
sub7	2007-08-27	47	1.5	0.48	36	3.41443	6.31	7.943	5.012	5.623	4.467	5.012	2.512	3.162	2.818	3.162
sub7	2007-08-27	47	1.5	0.48	36	3.04309	5.012	6.31	5.012	5.623	3.162	3.548	3.162	3.548	2.239	2.818
sub7	2007-08-27	47	1.5	0.48	36	3.22363	2.512	3.981	1.585	2.512	2.239	2.818	2.239	4.467	3.981	4.467
sub7	2007-08-27	47	1.5	0.48	36	2.71228	5.012	6.31	5.012	5.623	4.467	5.012	1.995	2.239	1.778	2.239
sub7	2007-08-27	47	1.5	0.48	126	3.2234	1.995	3.162	2.818	3.162	2.818	3.162	2.512	3.548	3.162	4.467
sub7	2007-08-27	47	1.5	0.48	126	1.49641	1.585	1.995	1.778	2.239	1.413	1.585	1.413	1.778	1.259	1.585
sub7	2007-08-27	47	1.5	0.48	126	3.98105	3.981	5.012	3.981	4.467	3.548	4.467	3.981	4.467	3.548	3.981
sub7	2007-08-27	47	1.5	0.48	126	2.61007	3.981	5.012	2.239	2.512	2.239	2.818	2.512	2.818	2.512	2.818
sub7	2007-08-27	47	1.5	0.48	126	2.19619	2.512	3.162	2.818	3.162	2.239	2.512	1.778	2.239	1.995	2.512
sub7	2007-08-28	47	1.5	0.48	36	3.22341	6.31	7.943	3.981	4.467	3.162	3.548	2.512	3.548	3.162	3.548
sub7	2007-08-28	47	1.5	0.48	36	3.98089	15.849	10	11.22	5.012	5.623	4.467	5.012	2.818	3.548	3.162
sub7	2007-08-28	47	1.5	0.48	36	2.98533	2.512	3.981	3.162	4.467	2.239	3.981	3.162	3.548	2.512	2.818
sub7	2007-08-28	47	1.5	0.48	36	2.8729	2.512	3.162	2.818	3.548	2.239	3.162	2.512	3.162	2.818	3.548
sub7	2007-08-28	47	1.5	0.48	36	3.41435	6.31	7.943	4.467	5.012	3.548	3.981	2.818	3.548	3.162	3.548
sub7	2007-08-28	47	1.5	0.48	36	3.28598	5.012	6.31	5.012	5.623	5.012	5.623	2.239	3.162	2.239	2.818
sub7	2007-08-28	47	1.5	0.48	36	3.16218	3.162	3.981	2.818	3.548	3.162	3.548	2.239	3.981	2.818	3.548
sub7	2007-08-28	47	1.5	0.48	36	2.71218	3.981	5.012	3.162	3.548	2.239	2.818	2.512	3.162	1.995	3.981
sub7	2007-08-28	47	1.5	0.48	36	3.61671	6.31	7.943	4.467	5.623	3.548	3.981	3.162	3.981	3.162	3.981
sub7	2007-08-28	47	1.5	0.48	36	1.38588	1.585	1.995	1.413	1.585	1.413	1.585	1.413	1.585	1.122	1.259
sub7	2007-08-28	47	1.5	0.48	36	1.71126	1.995	2.512	2.239	2.512	1.585	1.778	1.585	1.778	1.585	1.995
sub7	2007-08-29	47	1.5	0.48	36	2.03381	7.943	10	2.512	2.818	1.995	2.239	1.995	2.239	1.778	1.995
sub7	2007-08-29	47	1.5	0.48	36	2.28209	1.585	1.995	1.585	2.239	1.995	2.512	2.239	2.512	1.995	2.512
sub7	2007-08-29	47	1.5	0.48	36	4.05817	6.31	7.943	5.012	5.623	3.548	3.981	3.548	5.012	3.981	4.467
sub7	2007-08-29	47	1.5	0.48	36	4.05817	5.012	7.079	5.012	5.623	4.467	5.012	3.548	3.981	3.548	3.981
sub7	2007-08-29	47	1.5	0.48	36	2.71201	5.012	6.31	3.981	4.467	3.162	3.548	2.818	3.548	1.778	1.995
sub7	2007-08-29	47	1.5	0.48	36	4.73166	3.981	5.012	4.467	5.012	4.467	5.012	4.467	5.012	4.467	5.012
sub7	2007-08-29	47	1.5	0.48	36	2.87295	3.981	5.012	3.981	4.467	3.981	4.467	2.512	2.818	1.995	2.239
sub7	2007-08-29	47	1.5	0.48	36	2.51168	3.981	5.012	3.548	3.981	2.818	3.548	2.818	3.162	1.585	1.778
sub7	2007-08-29	47	1.5	0.48	36	2.19619	1.995	2.818	1.995	2.512	2.239	2.512	1.778	2.239	1.995	2.512
sub7	2007-08-29	47	1.5	0.48	36	2.07331	1.585	2.239	1.995	2.239	1.995	2.239	1.995	2.239	1.778	2.239
sub7	2007-08-29	47	1.5	0.48	36	2.71214	6.31	7.943	3.162	3.548	3.162	3.548	2.512	2.818	1.995	2.512
sub7	2007-08-29	47	1.5	0.48	36	2.98516	5.012	6.31	4.467	5.012	2.818	3.162	2.512	3.162	2.818	3.548
sub7	2007-08-30	47	1.5	0.48	36	2.23869	3.162	3.981	3.162	3.981	2.239	2.818	1.995	2.239	1.585	2.818
sub7	2007-08-30	47	1.5	0.48	36	2.61013	3.162	3.981	1.995	3.548	2.239	2.818	2.512	2.818	2.239	3.162
sub7	2007-08-30	47	1.5	0.48	36	3.68699	7.943	10	5.012	5.623	4.467	5.012	3.981	4.467	2.239	2.818
sub7	2007-08-30	47	1.5	0.48	36	2.15438	2.512	3.162	2.239	2.818	2.512	2.818	1.995	2.239	1.585	1.995
sub7	2007-08-30	47	1.5	0.48	36	3.98105	3.162	4.467	3.162	3.981	3.548	3.981	3.548	4.467	3.981	4.467
sub7	2007-08-30	47	1.5	0.48	36	4.73166	7.943	10	6.31	7.079	4.467	5.012	4.467	5.012	4.467	5.012
sub7	2007-08-30	47	1.5	0.48	36	1.77809	1	1.259	1.122	1.413	1.259	1.995	1.778	1.995	1.778	1.995
sub7	2007-08-30	47	1.5	0.48	36	2.11358	3.981	5.012	3.162	3.548	3.162	3.548	1.413	1.995	1.413	1.995
sub7	2007-08-30	47	1.5	0.48	36	2.03394	3.162	3.981	2.512	2.818	2.239	2.512	1.995	2.239	1.585	1.778
sub7	2007-08-30	47	1.5	0.48	36	4.29867	5.012	6.31	3.548	3.981	3.548	4.467	3.981	5.012	3.981	5.012
sub7	2007-08-30	47	1.5	0.48	36	2.92841	3.162	3.981	2.818	3.162	2.818	3.162	2.512	3.162	2.818	3.162
sub7	2007-08-30	47	1.5	0.48	36	2.56042	2.512	3.162	2.239	2.512	1.778	3.162	2.818	3.162	2.239	2.512
sub7	2007-08-31	47	1.5	0.48	36	1.77829	2.512	3.162	2.818	3.162	1.585	1.995	1.585	1.778	1.585	2.239
sub7	2007-08-31	47	1.5	0.48	36	3.48051	3.981	5.012	3.162	3.548	3.162	3.981	3.548	3.981	2.818	3.548
sub7	2007-08-31	47	1.5	0.48	36	2.92863	2.512	3.162	2.512	3.548	2.512	3.981	3.548	3.981	1.995	2.239
sub7	2007-08-31	47	1.5	0.48	36	2.11355	5.012	6.31	2.512	3.162	2.818	3.162	1.585	1.995	1.413	2.239
sub7	2007-08-31	47	1.5	0.48	36	2.98533	1	2.818	2.239	3.162	2.239	2.818	2.512	3.548	3.162	3.981
sub7	2007-08-31	47	1.5	0.48	36	1.61573	1.259	1.585	1.413	1.585	1.413	1.995	1.585	1.778	1.413	1.585
sub7	2007-08-31	47	1.5	0.48	36	1.30834	2.512	3.162	2.239	3.548	1.413	1.585	1.122	1.259	1.122	1.413
sub7	2007-08-31	47	1.5	0.48	36	1.7783	5.012	6.31	2.818	3.162	1.585	1.995	1.778	2.239	1.413	1.778
sub7	2007-08-31	47	1.5	0.48	36	3.2234	7.943	10	3.548	3.981	2.512	3.162	2.818	4.467	3.162	3.548
sub7	2007-08-31	47	1.5	0.48	36	1.95717	1	1.259	1	1.259	1.122	1.995	1.778	2.512	1.995	2.818
sub7	2007-08-31	47	1.5	0.48	36	1.99515	3.162	3.981	3.162	3.548	1.778	1.995	1.778	2.239	1.995	2.239
sub7	2007-08-31	47	1.5	0.48	36	2.41736	2.512	3.162	2.239	2.512	2.239	2.512	2.239	3.162	1.995	2.512
sub7	2007-09-04	47	1.5	0.48	36	2.71238	3.162	3.981	2.818	3.162	2.818	3.981	3.548	4.467	1.413	1.585
sub7	2007-09-04	47	1.5	0.48	36	2.66063	3.162	4.467	3.162	3.548	3.162	3.548	2.512	2.818	1.995	2.239
sub7	2007-09-04	47	1.5	0.48	36	1.91995	1	1.778	1.585	1.995	1.778	2.239	1.778	1.995	1.778	1.995
sub7	2007-09-04	47	1.5	0.48	36	1.91995	3.162	4.467	1.995	2.239	1.778	1.995	1.778	2.239	1.778	1.995
sub7	2007-09-04	47	1.5	0.48	36	3.4144	3.981	5.623	3.981	4.467	3.981	4.467	3.981	4.467	1.778	2.818
sub7	2007-09-04	47	1.5	0.48	36	2.66076	6.31	8.913	2.818	3.162	2.512	3.162	2.512	3.162	2.239	2.512
sub7	2007-09-04	47	1.5	0.48	36	1.7783	3.162	3.981	3.548	3.981	1.585	1.778	1.413	1.995	1.778	2.239
sub7	2007-09-04	47	1.5	0.48	36	1.23497	1	1.413	1.122	1.259	1.122	1.413	1.122	1.995	0.891	1.122
sub7	2007-09-04	47	1.5	0.48	36	2.1963	5.012	6.31	5.012	5.623	2.818	3.162	2.239	2.512	1.413	1.585
sub7	2007-09-04	47	1.5	0.48	36	2.07312	2.512	3.162	1.778	1.995	1.778	1.995	1.778	2.239	1.995	2.818
sub7	2007-09-04	47	1.5	0.48	36	3.28595	3.981	5.012	4.467	5.012	2.512	2.818	2.512	5.012	3.548	3.981
sub7	2007-09-04	47	1.5	0.48	36	2.15429	2.512	3.162	1.995	2.239	1.778	1.995	1.778	2.512	2.239	2.818
sub7	2007-09-06	47	1.5	0.48	36	1.6469	12.589	5.012	6.31	1.585	1.778	1.585	1.778	1.413	1.778	1.585
sub7	2007-09-06	47	1.5	0.48	36	1.61551	15.849	2.512	3.162	1.778	1.995	1.585	1.778	1.585	1.778	1.122
sub7	2007-09-06	47	1.5	0.48	36	1.64704	1.995	2.512	1.778	1.995	1.413	1.585	1.413	1.995	1.585	1.995
sub7	2007-09-06	47	1.5	0.48	36	1.92016	3.981	5.012	1.995	2.239	1.585	1.995	1.585	2.239	1.585	2.818
sub7	2007-09-06	47	1.5	0.48	36	1.52533	3.981	5.012	1.778	1.995	1.585	1.778	1.413	1.585	1.259	1.585
sub7	2007-09-06	47	1.5	0.48	36	1.7446	3.981	5.012	2.818	3.162	2.512	2.818	1.413	1.778	1.122	1.413
sub7	2007-09-06	47	1.5	0.48	126	1.92014	7.943	10	2.239	3.162	2.239	2.512	1.995	2.239	1.122	1.778
sub7	2007-09-06	47	1.5	0.48	126	2.32613	5.012	6.31	3.981	4.467	3.162	3.548	1.778	1.995	1.778	2.239
sub7	2007-09-06	47	1.5	0.48	126	1.84765	1.585	1.995	1.778	1.995	1.778	1.995	1.585	1.995	1.778	1.995
sub7	2007-09-06	47	1.5	0.48	126	2.61007	2.512	3.162	2.818	3.162	2.512	2.818	2.512	2.818	2.239	2.818
sub7	2007-09-06	47	1.5	0.48	126	2.19596	12.589	7.943	8.913	3.548	3.981	1.778	2.512	1.778	1.995	1.778
sub7	2007-09-06	47	1.5	0.48	126	2.28222	2.512	3.162	2.818	3.162	2.239	2.512	2.239	2.512	1.995	2.239
sub8	2007-08-27	47	1.5	0.48	36	4.21696	5.012	6.31	4.467	5.623	4.467	5.012	3.548	3.981	3.548	5.012
sub8	2007-08-27	47	1.5	0.48	36	4.55337	6.31	7.943	5.012	5.623	5.012	5.623	3.981	4.467	3.981	4.467
sub8	2007-08-27	47	1.5	0.48	36	6.55627	6.31	7.943	7.079	7.943	5.623	7.079	6.31	7.079	6.31	7.079
sub8	2007-08-27	47	1.5	0.48	36	4.64164	3.162	3.981	3.548	5.623	5.012	6.31	3.548	3.981	3.548	6.31
sub8	2007-08-27	47	1.5	0.48	36	3.04301	2.512	3.162	2.818	3.162	2.818	3.162	2.512	3.162	2.818	3.981
sub8	2007-08-27	47	1.5	0.48	36	4.21694	3.981	5.012	3.981	4.467	3.981	5.012	4.467	5.012	3.162	3.981
sub8	2007-08-27	47	1.5	0.48	126	5.30885	12.589	5.623	6.31	5.623	6.31	5.012	5.623	5.012	5.623	4.467
sub8	2007-08-27	47	1.5	0.48	126	3.90535	3.981	5.012	3.162	3.548	3.162	3.981	3.548	4.467	3.981	4.467
sub8	2007-08-27	47	1.5	0.48	126	4.73142	6.31	7.943	3.548	5.012	3.981	4.467	3.981	5.623	5.012	5.623
sub8	2007-08-27	47	1.5	0.48	126	4.38202	3.162	3.981	3.548	5.012	4.467	5.012	3.981	4.467	3.981	4.467
sub8	2007-08-27	47	1.5	0.48	126	4.91666	6.31	7.943	5.623	6.31	5.623	6.31	3.548	4.467	3.981	6.31
sub8	2007-08-27	47	1.5	0.48	126	4.55334	3.981	5.623	3.981	4.467	3.981	5.012	4.467	5.012	3.548	5.623
sub8	2007-08-29	47	1.5	0.48	36	3.61686	3.162	4.467	3.548	3.981	2.512	3.548	3.162	4.467	3.981	4.467
sub8	2007-08-29	47	1.5	0.48	36	2.71201	2.512	3.981	3.162	3.548	3.162	3.548	2.818	3.548	1.778	1.995
sub8	2007-08-29	47	1.5	0.48	36	3.61684	3.162	5.012	4.467	5.012	3.981	4.467	3.981	4.467	2.512	2.818
sub8	2007-08-29	47	1.5	0.48	36	2.56055	3.162	4.467	2.512	2.818	2.512	2.818	2.512	2.818	2.239	2.512
sub8	2007-08-29	47	1.5	0.48	36	3.61657	3.981	5.623	5.012	5.623	5.012	5.623	2.818	3.162	2.818	3.162
sub8	2007-08-29	47	1.5	0.48	36	3.22354	2.512	3.162	2.818	3.162	2.239	2.818	2.512	3.981	3.548	5.012
sub8	2007-08-29	47	1.5	0.48	36	4.55332	5.012	6.31	3.548	3.981	3.548	3.981	3.548	6.31	5.012	5.623
sub8	2007-08-29	47	1.5	0.48	36	3.83112	3.981	5.012	3.981	4.467	3.548	3.981	3.548	4.467	3.548	3.981
sub8	2007-08-29	47	1.5	0.48	36	4.29865	3.981	5.012	4.467	5.623	5.012	6.31	3.981	4.467	3.162	3.548
sub8	2007-08-29	47	1.5	0.48	36	4.05817	2.512	3.548	3.162	3.981	3.548	3.981	3.548	4.467	3.981	5.012
sub8	2007-08-29	47	1.5	0.48	36	3.22341	5.012	7.079	3.162	3.548	2.512	3.548	3.162	3.548	3.162	3.548
sub8	2007-08-29	47	1.5	0.48	36	1.77839	1.995	2.818	2.239	2.818	1.995	2.239	1.413	1.995	1.413	1.778
sub8	2007-08-31	47	1.5	0.48	36	3.28587	1.995	2.818	2.239	2.818	2.512	3.548	3.162	3.548	3.162	3.981
sub8	2007-08-31	47	1.5	0.48	36	1.77815	2.512	3.548	2.512	2.818	1.778	1.995	1.585	1.778	1.585	1.995
sub8	2007-08-31	47	1.5	0.48	36	3.75827	3.162	3.981	2.818	3.981	3.162	3.981	3.548	4.467	3.548	3.981
sub8	2007-08-31	47	1.5	0.48	36	3.68681	3.162	4.467	3.548	5.012	3.162	3.981	3.548	3.981	3.548	3.981
sub8	2007-08-31	47	1.5	0.48	36	2.6606	2.512	3.162	2.512	3.162	2.512	2.818	2.512	2.818	2.512	2.818
sub8	2007-08-31	47	1.5	0.48	36	2.98526	5.012	6.31	4.467	5.012	3.548	5.012	2.818	3.162	1.995	2.239
sub8	2007-08-31	47	1.5	0.48	36	2.87284	3.162	3.981	3.548	4.467	3.162	3.548	2.512	2.818	2.512	2.818
sub8	2007-08-31	47	1.5	0.48	36	1.95734	1.585	1.995	1.585	1.995	1.413	1.778	1	2.818	2.512	3.162
sub8	2007-08-31	47	1.5	0.48	36	3.68681	3.981	5.012	3.162	3.548	3.162	3.981	3.162	4.467	3.548	3.981
sub8	2007-08-31	47	1.5	0.48	36	2.98505	2.512	3.162	2.818	3.162	2.818	3.162	2.818	3.162	2.818	3.162
sub8	2007-08-31	47	1.5	0.48	36	2.15423	2.512	3.548	2.818	3.162	2.818	3.162	1.585	1.995	1.778	1.995
sub8	2007-08-31	47	1.5	0.48	36	2.23875	3.981	5.012	3.162	3.548	3.162	3.548	1.778	3.548	1.259	1.413
sub8	2007-09-06	47	1.5	0.48	36	3.22338	2.512	3.162	2.512	2.818	2.512	3.162	2.818	3.981	3.162	3.981
sub8	2007-09-06	47	1.5	0.48	36	3.0429	5.012	6.31	2.818	3.548	2.818	3.162	2.818	3.548	2.818	3.162
sub8	2007-09-06	47	1.5	0.48	36	1.95744	6.31	7.943	3.162	3.548	2.512	2.818	1.995	2.239	1.259	1.413
sub8	2007-09-06	47	1.5	0.48	36	4.05821	3.981	5.623	3.981	4.467	3.548	4.467	3.981	4.467	3.548	4.467
sub8	2007-09-06	47	1.5	0.48	36	3.16218	7.943	10	4.467	5.012	3.548	3.981	3.162	3.548	2.239	2.818
sub8	2007-09-06	47	1.5	0.48	36	3.22339	1.995	3.548	3.162	3.981	3.162	3.548	3.162	3.981	2.512	3.162
sub8	2007-09-06	47	1.5	0.48	36	4.73144	1.585	5.012	4.467	5.012	3.548	5.623	4.467	5.623	4.467	5.012
sub8	2007-09-06	47	1.5	0.48	36	2.71214	2.512	3.162	2.818	3.162	1.995	3.548	2.512	2.818	2.512	3.162
sub8	2007-09-06	47	1.5	0.48	36	3.22348	2.512	5.623	5.012	5.623	4.467	5.012	2.512	2.818	2.512	2.818
sub8	2007-09-06	47	1.5	0.48	36	2.03381	1.585	2.239	1.995	2.512	1.995	2.239	1.995	2.239	1.778	1.995
sub8	2007-09-06	47	1.5	0.48	36	2.28202	1.259	3.162	1.995	2.239	1.995	2.239	1.995	2.239	1.995	3.548
sub8	2007-09-06	47	1.5	0.48	36	2.66082	3.981	5.012	2.818	3.548	3.162	3.548	2.239	2.512	2.239	2.512
sub8	2007-09-07	47	1.5	0.48	36	2.56049	2.512	3.548	2.512	2.818	1.585	2.818	2.512	2.818	2.512	3.548
sub8	2007-09-07	47	1.5	0.48	36	2.28203	1.995	2.512	2.239	3.548	2.512	2.818	2.239	2.818	1.585	1.995
sub8	2007-09-07	47	1.5	0.48	36	3.04309	7.943	10	4.467	5.012	2.239	3.548	3.162	3.548	2.818	3.162
sub8	2007-09-07	47	1.5	0.48	36	3.4805	2.512	3.162	2.818	3.548	3.162	3.548	3.162	3.981	3.162	3.981
sub8	2007-09-07	47	1.5	0.48	36	3.22327	5.012	6.31	4.467	5.012	3.162	3.548	2.818	3.981	2.818	3.162
sub8	2007-09-07	47	1.5	0.48	36	4.29857	1.995	2.512	2.239	3.162	2.818	4.467	3.981	5.012	4.467	5.623
sub8	2007-09-07	47	1.5	0.48	36	3.54796	3.981	5.012	3.981	5.012	3.162	3.548	3.162	3.981	3.548	3.981
sub8	2007-09-07	47	1.5	0.48	36	4.38182	5.012	6.31	5.623	7.079	5.623	6.31	4.467	5.012	2.818	3.162
sub8	2007-09-07	47	1.5	0.48	36	6.94499	7.943	10	6.31	7.943	6.31	7.079	6.31	7.943	6.31	7.943
sub8	2007-09-07	47	1.5	0.48	36	6.18965	7.943	10	8.913	10	6.31	7.079	5.623	6.31	5.623	6.31
sub8	2007-09-07	47	1.5	0.48	36	7.49888	7.943	10	8.913	10	8.913	10	7.079	7.943	5.623	6.31
sub8	2007-09-07	47	1.5	0.48	36	2.41705	3.162	3.981	2.512	3.162	2.512	2.818	1.778	2.818	1.995	2.818
sub8	2007-09-09	47	1.5	0.48	36	2.8728	1.995	3.981	3.162	3.548	2.818	3.548	3.162	3.548	1.995	2.512
sub8	2007-09-09	47	1.5	0.48	36	2.19588	5.012	6.31	3.548	3.981	2.818	3.162	1.778	1.995	1.778	1.995
sub8	2007-09-09	47	1.5	0.48	36	2.51191	3.162	3.981	2.818	3.981	2.239	2.512	2.239	2.818	2.512	2.818
sub8	2007-09-09	47	1.5	0.48	36	2.41727	3.162	3.981	3.548	3.981	1.995	2.818	2.239	2.818	2.239	2.512
sub8	2007-09-09	47	1.5	0.48	36	2.87284	5.012	6.31	3.548	3.981	2.512	3.162	2.512	3.162	2.818	3.162
sub8	2007-09-09	47	1.5	0.48	36	2.66081	2.512	3.548	2.239	2.818	2.239	2.512	2.239	3.981	2.512	2.818
sub8	2007-09-09	47	1.5	0.48	36	2.66066	5.012	6.31	3.162	3.548	2.818	3.162	2.512	2.818	2.239	2.512
sub8	2007-09-09	47	1.5	0.48	36	2.37132	1.585	2.512	2.239	2.512	2.239	2.818	1.778	2.512	2.239	2.818
sub8	2007-09-09	47	1.5	0.48	36	2.98528	3.981	5.012	2.512	2.818	2.512	3.548	2.512	3.548	2.818	3.162
sub8	2007-09-09	47	1.5	0.48	36	1.7785	2.512	3.548	2.512	3.162	2.239	2.512	1.413	1.585	1.413	1.778
sub8	2007-09-09	47	1.5	0.48	36	2.81822	3.162	3.981	2.818	3.162	2.818	3.162	2.512	3.162	2.512	2.818
sub8	2007-09-09	47	1.5	0.48	36	3.22326	2.512	3.162	2.818	3.548	2.818	3.981	2.818	3.981	2.818	3.162
sub8	2007-09-12	47	1.5	0.48	36	3.90533	3.981	5.012	3.548	3.981	3.548	3.981	3.548	4.467	3.162	5.012
sub8	2007-09-12	47	1.5	0.48	36	3.98113	6.31	7.943	5.012	6.31	5.012	5.623	4.467	5.623	2.239	2.512
sub8	2007-09-12	47	1.5	0.48	36	2.51173	3.162	4.467	2.239	2.512	2.239	2.818	1.995	2.818	2.512	2.818
sub8	2007-09-12	47	1.5	0.48	36	2.98523	3.162	3.981	2.239	2.512	2.239	3.548	2.818	3.548	2.818	3.162
sub8	2007-09-12	47	1.5	0.48	36	2.61013	3.981	5.012	3.162	3.548	1.995	2.512	2.239	3.981	2.512	2.818
sub8	2007-09-12	47	1.5	0.48	126	3.28578	1.995	2.512	1.995	2.239	1.995	5.012	2.818	3.548	3.162	3.981
sub8	2007-09-12	47	1.5	0.48	126	5.10881	5.012	7.079	6.31	7.079	5.012	5.623	3.981	5.623	5.012	5.623
sub8	2007-09-12	47	1.5	0.48	126	7.35658	7.943	10	7.079	10	7.943	8.913	7.943	8.913	5.012	6.31
sub8	2007-09-12	47	1.5	0.48	126	3.75827	5.012	6.31	3.548	3.981	3.548	4.467	3.162	3.981	3.548	3.981
sub8	2007-09-12	47	1.5	0.48	126	4.217	3.981	5.623	4.467	5.012	3.981	4.467	3.981	4.467	3.981	4.467
sub8	2007-09-12	47	1.5	0.48	126	3.8311	3.981	6.31	5.012	5.623	3.981	4.467	3.548	3.981	3.162	3.981
sub9	2007-08-28	47	1.5	0.48	36	2.92857	6.31	7.943	7.079	10	3.548	3.981	2.512	2.818	2.239	2.818
sub9	2007-08-28	47	1.5	0.48	36	3.8311	2.512	3.162	2.818	3.981	3.162	4.467	3.981	4.467	3.162	3.981
sub9	2007-08-28	47	1.5	0.48	36	2.76501	1.995	2.512	1.995	3.548	2.239	3.548	2.239	2.512	2.239	4.467
sub9	2007-08-28	47	1.5	0.48	36	4.38193	6.31	7.943	5.012	6.31	4.467	5.623	3.981	4.467	3.548	4.467
sub9	2007-08-28	47	1.5	0.48	36	5.30872	5.012	6.31	5.623	6.31	5.012	5.623	5.012	5.623	5.012	5.623
sub9	2007-08-28	47	1.5	0.48	36	2.66056	3.162	3.981	3.162	3.981	2.818	3.981	3.162	3.548	1.585	1.778
sub9	2007-08-28	47	1.5	0.48	126	5.10911	12.589	8.913	10	7.943	8.913	4.467	6.31	3.981	4.467	3.981
sub9	2007-08-28	47	1.5	0.48	126	3.48062	3.162	3.981	2.818	3.548	2.512	3.981	3.162	3.981	3.548	3.981
sub9	2007-08-28	47	1.5	0.48	126	3.98089	6.31	7.943	7.079	7.943	3.162	3.548	2.818	5.012	4.467	5.623
sub9	2007-08-28	47	1.5	0.48	126	3.54797	5.012	6.31	3.981	4.467	3.162	3.548	2.818	3.981	3.548	4.467
sub9	2007-08-28	47	1.5	0.48	126	4.73142	5.012	6.31	3.981	4.467	3.981	5.623	4.467	5.623	3.981	5.012
sub9	2007-08-28	47	1.5	0.48	126	5.84349	5.012	6.31	4.467	5.623	5.012	6.31	5.623	6.31	5.623	6.31
sub9	2007-09-03	47	1.5	0.48	126	2.98516	2.512	3.162	2.818	3.981	3.162	3.548	2.818	3.162	2.512	2.818
sub9	2007-09-03	47	1.5	0.48	126	3.75827	3.981	5.012	4.467	5.012	3.548	3.981	3.548	3.981	3.548	3.981
sub9	2007-09-03	47	1.5	0.48	126	4.1368	1.995	3.548	3.162	3.548	3.162	4.467	3.981	4.467	3.981	5.012
sub9	2007-09-03	47	1.5	0.48	126	2.1136	1.995	3.162	2.512	2.818	2.512	2.818	1.413	2.239	1.778	2.239
sub9	2007-09-03	47	1.5	0.48	126	3.10211	2.512	3.162	2.512	2.818	2.512	2.818	2.512	3.548	3.162	4.467
sub9	2007-09-03	47	1.5	0.48	126	2.81822	3.162	3.981	2.512	3.162	2.818	3.162	2.512	3.162	2.512	2.818
sub9	2007-09-03	47	1.5	0.48	126	2.66072	2.512	3.162	2.512	2.818	2.239	3.162	2.818	3.162	2.239	2.512
sub9	2007-09-03	47	1.5	0.48	126	2.9285	3.162	5.012	2.818	3.981	3.162	3.981	2.512	2.818	2.512	2.818
sub9	2007-09-03	47	1.5	0.48	126	2.76476	2.512	3.981	3.548	3.981	2.239	3.548	2.512	3.162	1.995	3.548
sub9	2007-09-03	47	1.5	0.48	126	2.28205	2.512	3.548	2.512	2.818	2.239	2.818	1.995	2.239	1.995	2.512
sub9	2007-09-03	47	1.5	0.48	126	2.98526	3.981	5.012	3.981	4.467	3.548	3.981	2.512	2.818	2.512	2.818
sub9	2007-09-03	47	1.5	0.48	126	2.98526	2.512	3.162	2.818	3.162	2.512	3.162	2.818	3.162	2.512	3.981
sub9	2007-09-05	47	1.5	0.48	126	2.2386	1.259	1.778	1.585	2.239	1.778	2.818	2.239	2.818	1.778	2.239
sub9	2007-09-05	47	1.5	0.48	126	3.04319	3.162	3.981	3.162	3.548	3.162	3.981	3.162	3.548	2.239	2.512
sub9	2007-09-05	47	1.5	0.48	126	2.92847	1.995	2.512	2.239	2.512	2.239	3.548	2.818	3.162	2.818	3.162
sub9	2007-09-05	47	1.5	0.48	126	2.76474	1.995	3.162	2.512	3.162	2.512	3.548	2.512	2.818	2.512	2.818
sub9	2007-09-05	47	1.5	0.48	126	2.87284	3.162	3.981	3.548	3.981	3.162	3.548	2.512	2.818	2.512	2.818
sub9	2007-09-05	47	1.5	0.48	126	3.22329	3.981	5.623	3.981	5.012	3.162	3.548	3.162	3.548	2.818	3.162
sub9	2007-09-05	47	1.5	0.48	126	4.55328	5.012	6.31	4.467	5.012	4.467	5.623	3.981	4.467	3.548	5.623
sub9	2007-09-05	47	1.5	0.48	126	3.75826	3.162	3.981	3.548	3.981	3.548	4.467	3.548	5.012	2.818	3.548
sub9	2007-09-05	47	1.5	0.48	126	3.28586	3.162	4.467	3.162	3.548	3.162	3.981	3.548	3.981	2.512	2.818
sub9	2007-09-05	47	1.5	0.48	126	2.76469	5.012	6.31	2.239	2.512	2.239	2.818	2.512	3.162	2.818	3.162
sub9	2007-09-05	47	1.5	0.48	126	2.41719	1.259	2.512	1.995	2.818	1.995	2.818	1.995	2.512	2.239	3.162
sub9	2007-09-05	47	1.5	0.48	126	3.48049	3.981	5.012	3.981	4.467	3.981	4.467	2.818	3.981	2.818	3.162
sub9	2007-09-06	47	1.5	0.48	126	2.76475	6.31	7.943	5.012	5.623	2.818	3.162	2.239	2.818	2.239	3.548
sub9	2007-09-06	47	1.5	0.48	126	3.75827	3.981	5.012	3.981	4.467	3.981	4.467	3.548	3.981	3.162	3.548
sub9	2007-09-06	47	1.5	0.48	126	2.81834	3.981	5.012	2.512	3.548	2.818	3.548	2.239	2.818	2.239	3.548
sub9	2007-09-06	47	1.5	0.48	126	2.61013	3.981	5.012	2.818	3.548	2.818	3.162	2.239	2.512	2.239	2.818
sub9	2007-09-06	47	1.5	0.48	126	1.77823	0.794	1.122	1	1.413	1.259	1.995	1.585	2.239	1.778	1.995
sub9	2007-09-06	47	1.5	0.48	126	2.1545	1	1.413	1.259	2.512	1.778	1.995	1.413	2.512	2.239	3.548
sub9	2007-09-06	47	1.5	0.48	126	3.04309	3.981	5.012	4.467	5.012	3.162	3.548	3.162	3.548	2.239	2.818
sub9	2007-09-06	47	1.5	0.48	126	2.66082	3.981	5.012	3.981	4.467	2.239	2.512	2.239	3.162	2.512	3.548
sub9	2007-09-06	47	1.5	0.48	126	3.04302	3.162	3.981	2.512	2.818	2.512	3.548	2.818	3.162	2.818	3.548
sub9	2007-09-06	47	1.5	0.48	126	2.71217	12.589	2.512	2.818	2.512	3.162	2.512	2.818	2.512	2.818	2.512
sub9	2007-09-06	47	1.5	0.48	126	3.102	3.162	3.981	3.548	4.467	3.162	3.548	2.512	3.548	2.818	3.162
sub9	2007-09-06	47	1.5	0.48	126	3.162	2.512	3.162	2.818	3.548	3.162	3.548	2.818	3.548	2.818	3.162
sub9	2007-09-07	47	1.5	0.48	126	4.05815	7.943	10	5.623	6.31	5.623	6.31	3.981	4.467	2.512	2.818
sub9	2007-09-07	47	1.5	0.48	126	1.74449	1.585	1.995	1.585	1.995	1.585	2.239	1.585	1.778	1.585	1.778
sub9	2007-09-07	47	1.5	0.48	126	1.30835	3.162	3.981	1.585	1.995	1	1.585	1.413	1.585	1	1.413
sub9	2007-09-07	47	1.5	0.48	126	1.7112	1.995	2.512	2.239	2.512	1.585	1.995	1.778	1.995	1.259	1.778
sub9	2007-09-07	47	1.5	0.48	126	3.6868	3.981	5.012	4.467	5.012	4.467	5.012	2.818	3.548	3.162	3.548
sub9	2007-09-07	47	1.5	0.48	126	1.88368	1.585	1.995	1.585	1.778	1.585	2.239	1.995	2.239	1.585	1.778
sub9	2007-09-07	47	1.5	0.48	126	4.38199	3.981	5.012	3.981	5.623	4.467	5.012	3.548	4.467	3.981	5.012
sub9	2007-09-07	47	1.5	0.48	126	1.64696	2.512	3.548	1.259	1.778	1.585	1.778	1.585	1.995	1.413	1.585
sub9	2007-09-07	47	1.5	0.48	126	2.4639	3.162	3.981	2.818	3.162	2.818	3.162	2.512	2.818	1.778	1.995
sub9	2007-09-07	47	1.5	0.48	126	2.23859	2.512	3.162	2.818	3.981	2.239	2.512	1.995	3.162	1.778	1.995
sub9	2007-09-07	47	1.5	0.48	126	4.21687	2.512	3.162	2.818	5.012	3.981	4.467	3.981	5.623	3.548	3.981
sub9	2007-09-07	47	1.5	0.48	126	3.68681	5.012	6.31	3.162	3.548	3.162	3.981	3.548	3.981	3.548	3.981
sub9	2007-09-09	47	1.5	0.48	126	3.68694	5.012	6.31	3.981	4.467	3.981	4.467	3.981	4.467	2.512	3.162
sub9	2007-09-09	47	1.5	0.48	126	2.46405	2.512	3.162	1.778	3.548	3.162	3.548	1.778	2.512	1.995	2.239
sub9	2007-09-09	47	1.5	0.48	126	2.37126	1.995	2.512	1.995	2.239	1.995	2.818	2.239	2.818	1.585	3.162
sub9	2007-09-09	47	1.5	0.48	126	2.07312	3.981	5.012	2.818	3.162	2.818	3.162	1.259	1.995	1.778	1.995
sub9	2007-09-09	47	1.5	0.48	126	2.41719	1.995	3.162	2.512	2.818	1.995	3.162	2.512	2.818	1.995	2.239
sub9	2007-09-09	47	1.5	0.48	126	2.81824	5.012	6.31	3.548	3.981	3.162	3.548	2.818	3.548	1.995	2.239
sub9	2007-09-09	47	1.5	0.48	126	3.981	3.981	5.012	3.981	4.467	3.981	5.012	3.548	3.981	3.548	3.981
sub9	2007-09-09	47	1.5	0.48	126	2.23871	3.162	3.981	2.239	2.512	2.239	2.818	1.995	2.239	1.995	2.239
sub9	2007-09-09	47	1.5	0.48	126	2.8729	2.512	3.162	2.512	3.162	2.818	3.548	2.512	2.818	2.239	3.548
sub9	2007-09-09	47	1.5	0.48	126	2.87273	2.512	3.162	2.818	3.162	2.818	3.162	2.818	3.162	2.512	2.818
sub9	2007-09-09	47	1.5	0.48	126	2.03378	1.585	1.995	1.778	1.995	1.778	2.512	1.995	2.239	1.778	1.995
sub9	2007-09-09	47	1.5	0.48	126	2.61013	3.981	5.012	3.162	3.548	2.818	3.162	2.239	2.512	2.239	2.818
sub9	2007-09-10	47	1.5	0.48	36	4.55342	6.31	7.943	2.818	3.162	2.818	5.012	4.467	6.31	4.467	5.012
sub9	2007-09-10	47	1.5	0.48	36	4.29856	3.981	5.012	3.981	4.467	3.981	5.012	3.981	5.623	3.548	3.981
sub9	2007-09-10	47	1.5	0.48	36	3.22348	5.012	7.079	5.623	7.943	4.467	5.012	2.512	2.818	2.512	2.818
sub9	2007-09-10	47	1.5	0.48	36	2.46422	2.512	3.162	2.818	3.162	2.239	2.512	2.239	2.512	1.995	3.548
sub9	2007-09-10	47	1.5	0.48	36	3.162	1.995	2.818	2.512	3.548	2.818	3.548	3.162	3.548	2.818	3.162
sub9	2007-09-10	47	1.5	0.48	36	4.46677	5.012	6.31	4.467	5.012	4.467	5.012	3.981	5.012	3.162	5.623
sub9	2007-09-10	47	1.5	0.48	126	1.92015	15.849	2.512	2.818	2.239	2.512	1.995	2.239	1.585	1.778	1.585
sub9	2007-09-10	47	1.5	0.48	126	2.15448	5.012	6.31	3.548	3.981	2.239	2.512	1.778	2.239	1.995	2.239
sub9	2007-09-10	47	1.5	0.48	126	2.71229	3.981	5.012	3.548	3.981	3.548	3.981	2.239	2.512	1.995	2.512
sub9	2007-09-10	47	1.5	0.48	126	2.28186	2.512	3.162	2.512	3.162	1.778	1.995	1.778	2.818	2.512	3.162
sub9	2007-09-10	47	1.5	0.48	126	3.22327	2.512	3.162	2.512	3.162	2.818	3.162	2.818	3.548	3.162	3.981
sub9	2007-09-10	47	1.5	0.48	126	1.74465	1.995	2.512	1.778	2.239	1.995	2.239	1.413	1.585	1.413	1.995
sub10	2007-08-29	47	1.5	0.48	36	5.41167	12.589	5.012	7.079	5.623	7.943	6.31	7.079	3.981	4.467	3.981
sub10	2007-08-29	47	1.5	0.48	36	4.82312	6.31	7.943	3.981	4.467	3.981	5.012	2.818	6.31	5.623	6.31
sub10	2007-08-29	47	1.5	0.48	36	4.05815	5.012	7.079	6.31	7.079	5.623	6.31	3.981	4.467	2.512	2.818
sub10	2007-08-29	47	1.5	0.48	36	2.51169	3.981	5.012	3.162	3.548	2.512	2.818	1.778	2.818	2.512	2.818
sub10	2007-08-29	47	1.5	0.48	36	3.90536	12.589	7.079	8.913	2.818	4.467	3.548	4.467	2.818	4.467	3.981
sub10	2007-08-29	47	1.5	0.48	36	3.28575	2.512	5.012	3.548	3.981	3.548	3.981	2.818	3.162	2.818	3.548
sub10	2007-08-29	47	1.5	0.48	126	5.41169	12.589	8.913	10	5.012	5.623	5.012	5.623	5.012	6.31	5.012
sub10	2007-08-29	47	1.5	0.48	126	3.90532	3.981	5.012	3.981	5.012	4.467	5.012	2.818	3.981	3.162	4.467
sub10	2007-08-29	47	1.5	0.48	126	3.90526	3.981	5.623	2.239	3.162	2.818	3.162	2.818	6.31	4.467	5.012
sub10	2007-08-29	47	1.5	0.48	126	2.98528	3.162	3.981	2.512	3.162	2.818	3.548	2.512	3.162	2.512	3.548
sub10	2007-08-29	47	1.5	0.48	126	5.84349	3.162	5.623	5.012	5.623	5.012	6.31	5.623	6.31	5.623	6.31
sub10	2007-08-30	47	1.5	0.48	126	3.83112	15.849	3.981	4.467	3.162	3.981	3.548	4.467	3.548	3.981	3.548
sub10	2007-08-30	47	1.5	0.48	126	5.01193	7.943	10	6.31	7.943	5.623	6.31	4.467	5.012	3.981	5.012
sub10	2007-08-30	47	1.5	0.48	126	4.38182	5.012	6.31	5.623	6.31	5.623	6.31	4.467	5.012	2.818	3.162
sub10	2007-08-30	47	1.5	0.48	126	3.83097	6.31	7.943	5.623	6.31	5.012	5.623	2.818	3.548	3.162	3.548
sub10	2007-08-30	47	1.5	0.48	126	3.75827	3.981	5.012	3.981	5.012	3.981	4.467	3.548	3.981	3.162	3.548
sub10	2007-08-30	47	1.5	0.48	126	4.38199	7.943	11.22	3.981	5.012	4.467	5.012	3.981	5.012	3.548	4.467
sub10	2007-08-30	47	1.5	0.48	126	4.1368	5.012	7.079	5.012	5.623	3.981	4.467	3.981	5.012	3.162	4.467
sub10	2007-08-30	47	1.5	0.48	126	3.90534	12.589	4.467	5.012	3.981	4.467	3.548	5.012	3.162	4.467	3.162
sub10	2007-08-30	47	1.5	0.48	126	2.46407	3.981	5.012	2.818	3.162	1.995	2.512	2.239	2.818	2.512	2.818
sub10	2007-08-30	47	1.5	0.48	126	2.07342	1.585	2.239	1.995	2.239	1.995	2.512	1.413	2.239	1.995	2.512
sub10	2007-08-30	47	1.5	0.48	126	2.81828	2.512	3.162	2.818	3.162	2.818	3.162	2.512	3.162	2.239	3.162
sub10	2007-08-30	47	1.5	0.48	126	3.4805	2.512	3.548	3.162	3.548	3.162	3.981	3.162	3.548	3.162	3.981
sub10	2007-09-06	47	1.5	0.48	126	3.68682	12.589	3.981	5.012	2.818	4.467	3.548	3.981	2.818	3.981	3.548
sub10	2007-09-06	47	1.5	0.48	126	2.56055	3.162	3.981	2.512	3.162	2.512	2.818	2.512	2.818	2.239	2.512
sub10	2007-09-06	47	1.5	0.48	126	4.05815	6.31	7.943	6.31	7.079	4.467	5.012	3.981	4.467	2.818	3.981
sub10	2007-09-06	47	1.5	0.48	126	2.15429	7.943	10	3.981	4.467	2.239	2.512	1.778	1.995	1.778	2.818
sub10	2007-09-06	47	1.5	0.48	126	2.32628	1.995	2.818	2.239	3.548	2.512	3.162	1.995	2.239	1.995	2.239
sub10	2007-09-06	47	1.5	0.48	126	3.0432	3.981	5.012	3.981	4.467	3.162	3.548	2.512	3.548	2.239	3.548
sub10	2007-09-06	47	1.5	0.48	126	3.54793	2.512	3.162	2.512	3.548	3.162	3.548	3.162	3.981	2.818	5.012
sub10	2007-09-06	47	1.5	0.48	126	2.98505	5.012	6.31	2.818	3.548	2.818	3.162	2.818	3.162	2.818	3.162
sub10	2007-09-06	47	1.5	0.48	126	2.28222	1.585	2.512	2.239	2.818	2.239	2.512	2.239	2.512	1.995	2.239
sub10	2007-09-06	47	1.5	0.48	126	3.98101	5.012	6.31	3.981	4.467	3.981	4.467	3.981	5.012	3.162	3.548
sub10	2007-09-06	47	1.5	0.48	126	2.23855	2.512	3.162	2.239	2.512	1.778	2.818	1.995	2.512	1.995	2.512
sub10	2007-09-06	47	1.5	0.48	126	3.16218	3.162	5.012	4.467	5.012	3.162	3.548	3.162	3.981	2.239	3.162
sub10	2007-09-09	47	1.5	0.48	126	4.05819	3.981	5.012	2.818	3.548	3.162	4.467	3.981	4.467	3.981	4.467
sub10	2007-09-09	47	1.5	0.48	126	3.83119	12.589	3.548	5.623	4.467	5.012	4.467	5.012	2.512	3.548	3.162
sub10	2007-09-09	47	1.5	0.48	126	5.30872	5.012	7.079	6.31	7.079	5.012	5.623	5.012	5.623	5.012	5.623
sub10	2007-09-09	47	1.5	0.48	126	4.82317	5.012	6.31	5.012	5.623	5.012	7.079	3.981	5.012	3.981	4.467
sub10	2007-09-09	47	1.5	0.48	126	2.76463	5.012	6.31	2.818	3.162	2.818	3.162	2.512	2.818	2.512	2.818
sub10	2007-09-09	47	1.5	0.48	126	4.29869	7.943	11.22	5.623	6.31	5.012	5.623	4.467	5.012	2.512	3.981
sub10	2007-09-09	47	1.5	0.48	126	3.34944	6.31	7.943	5.012	6.31	3.162	3.548	3.162	3.548	3.162	3.548
sub10	2007-09-09	47	1.5	0.48	126	2.81822	1.585	2.239	1.778	3.548	2.818	3.162	2.512	2.818	2.512	3.162
sub10	2007-09-09	47	1.5	0.48	126	3.28604	2.512	3.162	2.512	3.162	2.239	2.818	2.512	4.467	3.981	4.467
sub10	2007-09-09	47	1.5	0.48	126	2.32628	1.585	2.818	2.239	2.818	2.239	3.162	1.995	2.239	1.995	2.512
sub10	2007-09-09	47	1.5	0.48	126	4.13672	3.981	5.012	3.981	5.012	3.548	3.981	3.548	5.623	3.981	4.467
sub10	2007-09-09	47	1.5	0.48	126	6.18953	6.31	7.943	7.079	7.943	5.623	6.31	5.623	7.943	5.623	6.31
sub10	2007-09-11	47	1.5	0.48	126	3.34943	12.589	3.548	3.981	3.162	3.981	3.162	3.548	3.162	3.548	2.818
sub10	2007-09-11	47	1.5	0.48	126	3.41435	6.31	7.943	4.467	5.012	3.548	3.981	3.162	3.548	2.818	3.548
sub10	2007-09-11	47	1.5	0.48	126	4.05817	3.981	5.012	3.981	4.467	3.548	3.981	3.548	5.012	3.981	4.467
sub10	2007-09-11	47	1.5	0.48	126	3.10187	5.012	7.079	2.818	3.162	2.818	3.162	2.818	3.162	2.818	3.981
sub10	2007-09-11	47	1.5	0.48	126	3.75827	6.31	8.913	4.467	5.623	3.548	4.467	3.162	3.981	3.548	3.981
sub10	2007-09-11	47	1.5	0.48	126	3.41435	6.31	7.943	3.981	4.467	3.162	3.548	3.162	3.981	3.162	3.548
sub10	2007-09-11	47	1.5	0.48	126	3.0429	2.512	3.548	3.162	3.548	2.818	3.162	2.818	3.162	2.818	3.548
sub10	2007-09-11	47	1.5	0.48	126	3.75816	3.162	3.981	3.162	3.548	3.162	3.548	3.162	3.981	3.548	5.623
sub10	2007-09-11	47	1.5	0.48	126	3.98103	6.31	7.943	7.079	7.943	3.981	4.467	3.981	4.467	3.162	3.981
sub10	2007-09-11	47	1.5	0.48	126	4.55348	6.31	7.943	5.012	5.623	4.467	5.012	4.467	5.012	3.981	4.467
sub10	2007-09-11	47	1.5	0.48	126	3.41435	3.981	5.012	3.548	3.981	3.162	3.981	3.162	3.548	3.162	3.548
sub10	2007-09-11	47	1.5	0.48	126	3.90533	6.31	7.943	6.31	7.079	4.467	5.012	3.548	3.981	3.162	3.548
sub10	2007-09-12	47	1.5	0.48	126	3.04302	12.589	6.31	7.079	2.512	3.162	2.818	3.548	2.512	3.548	2.818
sub10	2007-09-12	47	1.5	0.48	126	2.66066	1.995	3.548	2.818	3.981	2.512	3.162	2.512	2.818	2.239	2.818
sub10	2007-09-12	47	1.5	0.48	126	3.61686	5.012	6.31	5.623	7.943	3.548	3.981	3.548	4.467	2.512	3.981
sub10	2007-09-12	47	1.5	0.48	126	2.87273	1.585	2.239	1.995	3.162	2.818	3.162	2.818	3.162	2.512	2.818
sub10	2007-09-12	47	1.5	0.48	126	2.03383	3.162	3.981	2.818	3.162	1.995	2.512	1.778	2.512	1.585	1.995
sub10	2007-09-12	47	1.5	0.48	126	1.95712	1.585	1.995	1.778	1.995	1.778	1.995	1.778	1.995	1.778	2.512
sub10	2007-09-12	47	1.5	0.48	126	3.28593	2.512	3.162	2.512	2.818	2.512	3.981	1.995	3.981	3.548	4.467
sub10	2007-09-12	47	1.5	0.48	126	3.98101	5.012	6.31	5.012	6.31	3.981	4.467	3.548	3.981	3.162	5.012
sub10	2007-09-12	47	1.5	0.48	126	3.04319	5.012	7.079	6.31	7.079	3.162	3.548	3.162	3.981	2.239	2.512
sub10	2007-09-12	47	1.5	0.48	126	2.81832	2.512	3.548	2.512	3.162	2.512	2.818	2.512	3.548	2.512	3.162
sub10	2007-09-12	47	1.5	0.48	126	2.03397	2.512	3.162	2.818	3.162	1.995	2.239	1.778	2.239	1.413	2.818
sub10	2007-09-12	47	1.5	0.48	126	3.10225	3.981	5.623	5.012	5.623	4.467	5.012	2.512	2.818	2.239	2.512
sub10	2007-09-13	47	1.5	0.48	36	3.2234	3.162	5.012	3.548	3.981	3.162	3.548	2.818	3.162	2.512	4.467
sub10	2007-09-13	47	1.5	0.48	36	4.13685	3.162	4.467	3.548	4.467	3.548	4.467	3.981	4.467	3.981	4.467
sub10	2007-09-13	47	1.5	0.48	36	3.61673	3.981	5.623	5.012	5.623	3.548	4.467	3.162	3.548	3.162	3.981
sub10	2007-09-13	47	1.5	0.48	36	5.95661	12.589	10	11.22	7.943	8.913	5.012	5.623	5.012	7.079	5.012
sub10	2007-09-13	47	1.5	0.48	36	5.41172	6.31	7.943	4.467	5.012	4.467	5.012	4.467	6.31	5.623	7.079
sub10	2007-09-13	47	1.5	0.48	36	2.98526	3.981	5.012	3.548	3.981	3.162	3.981	2.512	3.162	2.512	2.818
sub10	2007-09-13	47	1.5	0.48	126	2.71217	3.981	5.012	2.818	3.548	2.512	2.818	2.512	3.162	2.512	2.818
sub10	2007-09-13	47	1.5	0.48	126	3.34943	2.512	3.548	2.818	3.162	2.818	3.548	3.162	3.548	3.162	3.981
sub10	2007-09-13	47	1.5	0.48	126	3.48051	3.162	3.981	3.548	4.467	2.818	3.548	3.162	3.981	3.548	3.981
sub10	2007-09-13	47	1.5	0.48	126	3.34941	2.512	3.162	2.818	5.012	2.818	3.162	2.818	3.981	3.548	3.981
sub10	2007-09-13	47	1.5	0.48	126	3.10217	3.162	3.981	2.818	3.981	3.548	4.467	2.239	3.162	2.512	3.162
sub10	2007-09-13	47	1.5	0.48	126	4.29861	5.012	6.31	3.548	5.012	4.467	5.623	3.981	4.467	3.548	3.981

## Sheet: Raw_Fig1d
ID	date	contrast	spatial frequency (c/d)	standard deviation (deg)	orientation (deg)	threshold	preliminary reversals				experimental reversals
sub1	2014-03-31	47	1.5	0.48	36	7.272	10	7.079	7.943	7.079	8.913	7.079	7.943	6.31	7.079	6.31
sub1	2014-03-31	47	1.5	0.48	36	5.136	7.943	4.467	5.012	4.467	5.623	5.012	5.623	4.467	5.623	4.467
sub1	2014-03-31	47	1.5	0.48	36	3.815	3.981	5.012	3.548	3.981	3.548	3.981	2.818	3.981	3.548	5.012
sub1	2014-03-31	47	1.5	0.48	36	4.191	3.981	6.31	3.981	4.467	3.981	4.467	3.548	3.981	3.548	5.623
sub1	2014-03-31	47	1.5	0.48	36	4.152	7.943	5.623	6.31	3.548	4.467	3.981	4.467	3.548	4.467	3.981
sub1	2014-03-31	47	1.5	0.48	36	5.066	7.943	6.31	7.079	5.012	6.31	3.162	5.623	5.012	6.31	3.981
sub1	2014-03-31	47	1.5	0.48	126	4.681	7.943	5.623	6.31	5.623	6.31	2.818	5.012	4.467	5.012	4.467
sub1	2014-03-31	47	1.5	0.48	126	2.62	5.012	6.31	4.467	5.012	2.239	2.818	2.512	2.818	2.512	2.818
sub1	2014-03-31	47	1.5	0.48	126	3.717	3.162	4.467	3.548	4.467	3.981	4.467	3.162	3.981	3.162	3.548
sub1	2014-03-31	47	1.5	0.48	126	3.321	2.512	3.162	2.818	3.548	2.818	3.162	2.818	3.981	3.162	3.981
sub1	2014-03-31	47	1.5	0.48	126	4.487	5.012	6.31	4.467	5.012	3.981	4.467	3.981	5.012	4.467	5.012
sub1	2014-03-31	47	1.5	0.48	126	2.784	3.981	5.012	2.239	2.818	1.995	2.239	1.778	3.981	3.162	3.548
sub1	2014-04-02	47	1.5	0.48	36	4.658	3.162	5.012	4.467	5.623	3.981	5.012	4.467	5.012	4.467	5.012
sub1	2014-04-02	47	1.5	0.48	36	4.345	7.943	5.012	6.31	5.012	5.623	3.981	4.467	3.548	4.467	3.981
sub1	2014-04-02	47	1.5	0.48	36	4.841	5.012	6.31	5.623	6.31	4.467	5.012	4.467	5.623	4.467	5.012
sub1	2014-04-02	47	1.5	0.48	36	2.745	3.981	5.012	3.548	3.981	2.818	3.162	2.818	3.162	1.995	2.512
sub1	2014-04-02	47	1.5	0.48	36	3.334	3.981	5.012	3.981	4.467	3.162	3.981	2.512	3.981	2.818	3.548
sub1	2014-04-02	47	1.5	0.48	36	3.12	5.012	6.31	3.548	4.467	3.548	3.981	2.239	3.162	2.239	3.548
sub1	2014-04-02	47	1.5	0.48	36	3.659	7.943	4.467	5.012	4.467	5.012	3.981	4.467	2.818	3.162	2.512
sub1	2014-04-02	47	1.5	0.48	36	4.063	2.512	3.162	2.818	3.548	3.162	3.981	3.162	4.467	3.981	5.623
sub1	2014-04-02	47	1.5	0.48	36	2.117	1.585	1.995	1.778	2.512	1.995	2.239	1.995	2.239	1.995	2.239
sub1	2014-04-02	47	1.5	0.48	36	3.838	3.162	3.981	3.548	4.467	3.548	5.623	3.162	3.981	3.162	3.548
sub1	2014-04-04	47	1.5	0.48	36	4.371	7.943	4.467	5.012	3.548	3.981	3.162	4.467	3.981	5.623	5.012
sub1	2014-04-04	47	1.5	0.48	36	3.781	3.162	3.981	3.548	3.981	3.548	4.467	3.162	3.981	3.548	3.981
sub1	2014-04-04	47	1.5	0.48	36	3.944	5.012	6.31	5.623	6.31	3.981	5.012	3.548	3.981	3.162	3.981
sub1	2014-04-04	47	1.5	0.48	36	2.907	3.981	5.012	3.162	3.548	2.818	3.162	2.239	3.162	2.512	3.548
sub1	2014-04-04	47	1.5	0.48	36	2.407	1.995	2.512	2.239	2.512	2.239	3.162	1.778	2.512	2.239	2.512
sub1	2014-04-04	47	1.5	0.48	36	3.759	3.981	5.012	4.467	5.012	4.467	5.012	3.162	3.548	2.818	3.548
sub1	2014-04-04	47	1.5	0.48	36	3.176	7.943	3.981	4.467	2.239	3.548	2.818	3.162	2.818	3.548	3.162
sub1	2014-04-04	47	1.5	0.48	36	2.3	1.995	3.162	2.818	3.162	2.512	2.818	1.995	2.239	1.995	2.239
sub1	2014-04-04	47	1.5	0.48	36	2.414	5.012	6.31	2.818	3.162	2.239	2.512	1.585	2.818	2.512	2.818
sub1	2014-04-04	47	1.5	0.48	36	2.058	3.981	5.012	3.162	3.548	1.585	2.512	1.995	2.239	1.778	2.239
sub1	2014-04-06	47	1.5	0.48	36	1.566	1	1.259	1.122	1.413	1.259	1.585	1.413	1.778	1.585	1.778
sub1	2014-04-06	47	1.5	0.48	36	3.455	3.162	3.981	3.162	3.548	3.162	3.548	2.512	3.981	3.548	3.981
sub1	2014-04-06	47	1.5	0.48	36	3.14	1.995	4.467	2.818	4.467	3.548	3.981	2.818	3.162	2.512	2.818
sub1	2014-04-06	47	1.5	0.48	36	2.58	2.512	3.162	2.512	3.162	2.512	2.818	2.239	2.512	2.239	3.162
sub1	2014-04-06	47	1.5	0.48	36	1.718	3.162	3.981	1.585	1.995	1.585	1.778	1.585	1.778	1.585	1.995
sub1	2014-04-06	47	1.5	0.48	36	2.117	1.585	2.239	1.778	2.239	1.995	2.239	1.995	2.239	1.995	2.239
sub1	2014-04-06	47	1.5	0.48	36	1.455	1.259	1.585	1.413	1.585	1.259	1.585	1.413	1.995	0.891	1.585
sub1	2014-04-06	47	1.5	0.48	36	2.894	2.512	3.162	2.512	2.818	2.512	4.467	2.239	2.818	2.512	2.818
sub1	2014-04-06	47	1.5	0.48	36	1.855	1.995	2.512	1.778	1.995	1.778	1.995	1.585	1.995	1.778	1.995
sub1	2014-04-06	47	1.5	0.48	36	2.249	3.162	3.981	2.239	2.512	2.239	2.512	1.995	2.239	1.995	2.512
sub1	2014-04-07	47	1.5	0.48	36	1.576	1.259	1.778	1.122	1.259	1.122	1.778	1.585	1.778	1.413	1.778
sub1	2014-04-07	47	1.5	0.48	36	1.437	1.585	2.239	1.995	2.239	1.585	1.778	1.413	1.585	1	1.259
sub1	2014-04-07	47	1.5	0.48	36	1.353	1.585	1.995	1.585	2.239	1.413	1.585	1.413	1.585	1	1.122
sub1	2014-04-07	47	1.5	0.48	36	1.516	1.585	1.995	1.778	1.995	1.585	1.995	1.259	1.413	1.259	1.585
sub1	2014-04-07	47	1.5	0.48	36	1.826	1.995	2.512	1.995	2.512	2.239	2.512	1.585	1.778	1.259	1.585
sub1	2014-04-07	47	1.5	0.48	36	1.543	2.512	3.162	1.778	2.239	1.413	1.778	1.585	1.778	1.122	1.585
sub1	2014-04-07	47	1.5	0.48	36	1.895	2.512	3.548	1.778	2.239	1.995	2.239	1.778	1.995	1.585	1.778
sub1	2014-04-07	47	1.5	0.48	36	0.959	1.259	1.585	1	1.259	1.122	1.259	0.794	0.891	0.794	0.891
sub1	2014-04-07	47	1.5	0.48	36	1.116	3.162	3.981	0.891	1	0.891	1.995	1	1.122	0.794	0.891
sub1	2014-04-07	47	1.5	0.48	36	1.107	1.585	1.995	1.585	1.778	1	1.259	1	1.122	1	1.259
sub1	2014-04-09	47	1.5	0.48	36	1.436	1.585	2.239	1.778	2.239	1.585	1.778	1.585	1.778	0.891	1
sub1	2014-04-09	47	1.5	0.48	36	1.048	1.995	2.512	1	1.259	0.891	1.122	0.891	1.122	1	1.259
sub1	2014-04-09	47	1.5	0.48	36	1.043	1	1.413	1.259	1.413	1	1.122	1	1.122	0.891	1.122
sub1	2014-04-09	47	1.5	0.48	36	2.734	3.162	3.981	2.512	2.818	2.512	3.162	2.818	3.162	2.239	2.512
sub1	2014-04-09	47	1.5	0.48	36	2.081	1.995	2.512	2.239	2.512	1.778	2.239	1.995	2.239	1.995	2.239
sub1	2014-04-09	47	1.5	0.48	36	0.895	1	1.413	1.259	1.413	1	1.122	0.891	1	0.562	0.794
sub1	2014-04-09	47	1.5	0.48	36	1.39	1.585	2.239	1.778	1.995	1.413	1.585	1.259	1.413	1.259	1.413
sub1	2014-04-09	47	1.5	0.48	36	0.85	0.794	1.122	0.562	0.794	0.708	0.794	0.562	0.708	0.562	0.631
sub1	2014-04-09	47	1.5	0.48	36	2.226	2.512	3.162	1.995	2.239	1.995	2.512	1.585	2.512	2.239	2.512
sub1	2014-04-09	47	1.5	0.48	36	1.153	1.995	2.512	1.413	1.995	1.259	1.413	1	1.122	1	1.122
sub1	2014-04-11	47	1.5	0.48	36	1.293	2.512	3.162	1.122	1.259	1.122	1.413	1.259	1.585	1.122	1.259
sub1	2014-04-11	47	1.5	0.48	36	1.27	1	1.259	1.122	1.259	1.122	1.413	1.122	1.259	1.122	1.585
sub1	2014-04-11	47	1.5	0.48	36	1.001	1.585	1.995	1.585	1.995	1.122	1.259	0.794	1.122	0.708	1
sub1	2014-04-11	47	1.5	0.48	36	0.916	0.794	1.413	1.259	1.585	1	1.122	0.794	0.891	0.794	0.891
sub1	2014-04-11	47	1.5	0.48	36	0.85	1	1.259	0.891	1	0.891	1.122	0.708	0.891	0.631	0.708
sub1	2014-04-11	47	1.5	0.48	126	2.126	2.512	3.162	2.818	3.162	1.995	2.512	1.778	2.239	1.995	2.239
sub1	2014-04-11	47	1.5	0.48	126	1.309	1.585	1.995	1.585	1.778	1.122	1.259	0.891	1.585	1.413	1.585
sub1	2014-04-11	47	1.5	0.48	126	0.85	2.512	3.162	1.122	1.413	0.708	0.794	0.708	0.891	0.794	0.891
sub1	2014-04-11	47	1.5	0.48	126	1.505	1.585	2.239	1.585	2.512	1.413	1.585	1.413	1.778	1.259	1.585
sub1	2014-04-11	47	1.5	0.48	126	2.309	2.512	3.162	2.512	2.818	2.512	2.818	1.995	2.512	1.778	2.239
sub2	2014-04-01	47	1.5	0.48	36	7.258	5.012	10	8.913	10	8.913	10	5.623	6.31	5.623	7.079
sub2	2014-04-01	47	1.5	0.48	36	4.872	3.981	5.012	4.467	5.623	3.981	5.012	3.981	5.623	5.012	5.623
sub2	2014-04-01	47	1.5	0.48	36	6.838	7.943	6.31	7.079	6.31	7.943	6.31	7.079	6.31	7.079	6.31
sub2	2014-04-01	47	1.5	0.48	36	6.625	15.849	7.943	8.913	6.31	7.943	6.31	7.943	5.623	6.31	5.623
sub2	2014-04-01	47	1.5	0.48	36	6.809	10	7.943	8.913	7.079	12.589	5.623	6.31	5.012	6.31	5.012
sub2	2014-04-01	47	1.5	0.48	36	8.587	3.981	5.623	4.467	5.012	3.162	8.913	7.943	10	8.913	12.589
sub2	2014-04-01	47	1.5	0.48	126	5.298	7.943	5.623	6.31	5.623	7.079	3.981	5.623	4.467	5.623	5.012
sub2	2014-04-01	47	1.5	0.48	126	5.298	7.943	5.623	6.31	4.467	5.623	4.467	5.623	5.012	7.079	3.981
sub2	2014-04-01	47	1.5	0.48	126	5.581	7.943	5.623	6.31	5.623	6.31	5.623	6.31	4.467	6.31	4.467
sub2	2014-04-01	47	1.5	0.48	126	5.954	7.943	3.548	5.012	3.548	3.981	3.162	5.623	5.012	10	7.943
sub2	2014-04-01	47	1.5	0.48	126	8.272	5.012	6.31	5.623	7.943	7.079	11.22	7.079	7.943	6.31	10
sub2	2014-04-01	47	1.5	0.48	126	4.973	7.943	3.981	5.012	3.162	3.981	3.548	5.623	3.981	7.079	5.623
sub2	2014-04-02	47	1.5	0.48	126	2.85	1.585	2.239	1.995	2.512	2.239	2.818	2.512	3.162	2.818	3.548
sub2	2014-04-02	47	1.5	0.48	126	4.709	2.512	3.981	3.548	3.981	3.548	4.467	3.981	5.623	5.012	5.623
sub2	2014-04-02	47	1.5	0.48	126	3.37	5.012	6.31	4.467	5.012	3.548	3.981	3.162	3.548	2.818	3.162
sub2	2014-04-02	47	1.5	0.48	126	2.971	2.512	3.162	2.239	2.818	2.239	2.818	2.512	3.548	3.162	3.548
sub2	2014-04-02	47	1.5	0.48	126	5.469	5.012	7.079	4.467	5.012	4.467	5.623	5.012	7.079	5.012	5.623
sub2	2014-04-02	47	1.5	0.48	126	4.396	2.512	5.623	3.981	5.012	4.467	5.012	3.981	4.467	3.981	4.467
sub2	2014-04-02	47	1.5	0.48	126	4.435	2.512	3.162	2.818	4.467	3.981	5.012	4.467	5.623	3.548	3.981
sub2	2014-04-02	47	1.5	0.48	126	5.877	5.012	6.31	5.623	7.079	3.981	7.943	5.623	7.079	5.012	5.623
sub2	2014-04-02	47	1.5	0.48	126	3.184	5.012	6.31	2.818	3.548	3.162	3.981	2.818	3.162	2.818	3.162
sub2	2014-04-02	47	1.5	0.48	126	7.3	5.012	6.31	5.012	8.913	7.943	10	6.31	8.913	5.012	5.623
sub2	2014-04-03	47	1.5	0.48	126	3.587	7.943	4.467	5.012	2.818	3.162	2.818	4.467	3.548	3.981	3.548
sub2	2014-04-03	47	1.5	0.48	126	4.435	2.512	3.162	2.818	5.623	4.467	5.012	3.981	5.623	3.548	3.981
sub2	2014-04-03	47	1.5	0.48	126	4.106	1.995	3.162	2.818	5.012	4.467	5.012	3.981	4.467	3.162	3.548
sub2	2014-04-03	47	1.5	0.48	126	5.25	5.012	6.31	5.623	6.31	5.623	6.31	4.467	5.012	4.467	5.623
sub2	2014-04-03	47	1.5	0.48	126	4.781	2.512	4.467	3.981	4.467	3.981	5.623	5.012	5.623	3.981	4.467
sub2	2014-04-03	47	1.5	0.48	126	3.645	3.162	4.467	3.981	4.467	3.981	4.467	3.162	3.548	3.162	3.548
sub2	2014-04-03	47	1.5	0.48	126	2.235	3.162	4.467	2.818	4.467	1.995	2.239	1.778	2.239	1.995	3.162
sub2	2014-04-03	47	1.5	0.48	126	4.645	10	3.981	5.012	3.548	5.623	5.012	5.623	3.981	4.467	3.162
sub2	2014-04-03	47	1.5	0.48	126	3.671	7.943	5.623	6.31	5.623	6.31	3.548	3.981	2.512	3.162	2.512
sub2	2014-04-03	47	1.5	0.48	126	4.243	3.162	3.981	2.818	4.467	3.981	5.012	3.981	4.467	3.548	4.467
sub2	2014-04-04	47	1.5	0.48	126	3.474	7.943	3.981	5.012	3.162	3.548	2.239	3.981	3.548	3.981	3.548
sub2	2014-04-04	47	1.5	0.48	126	4.396	7.943	5.012	5.623	2.818	4.467	3.981	4.467	3.981	5.012	4.467
sub2	2014-04-04	47	1.5	0.48	126	3.943	3.981	6.31	3.981	5.623	3.162	4.467	3.548	4.467	3.548	4.467
sub2	2014-04-04	47	1.5	0.48	126	3.66	3.981	5.012	3.548	4.467	3.981	4.467	3.548	3.981	2.818	3.162
sub2	2014-04-04	47	1.5	0.48	126	4.315	3.981	5.012	4.467	5.012	3.981	5.012	3.981	4.467	3.981	4.467
sub2	2014-04-04	47	1.5	0.48	126	2.843	2.512	3.162	2.818	3.548	2.818	3.162	2.512	3.162	2.239	3.162
sub2	2014-04-04	47	1.5	0.48	126	5.298	3.981	6.31	4.467	6.31	5.623	7.079	5.012	5.623	3.981	4.467
sub2	2014-04-04	47	1.5	0.48	126	2.958	2.512	3.162	2.818	3.162	2.818	3.162	2.818	3.162	2.239	3.548
sub2	2014-04-04	47	1.5	0.48	126	3.455	3.981	5.012	3.548	4.467	3.548	3.981	3.162	3.981	2.512	3.548
sub2	2014-04-04	47	1.5	0.48	126	3.248	2.512	4.467	2.818	4.467	2.818	3.981	3.162	3.548	2.818	3.162
sub2	2014-04-06	47	1.5	0.48	126	4.378	3.981	5.012	3.981	4.467	3.981	4.467	3.981	6.31	3.548	3.981
sub2	2014-04-06	47	1.5	0.48	126	3.004	2.512	3.162	2.818	3.981	2.512	3.548	2.818	3.162	2.818	3.162
sub2	2014-04-06	47	1.5	0.48	126	3.233	2.512	3.162	2.818	3.548	1.995	3.548	3.162	3.981	3.162	3.548
sub2	2014-04-06	47	1.5	0.48	126	2.472	3.162	3.981	2.818	3.162	2.512	2.818	2.239	2.512	2.239	2.512
sub2	2014-04-06	47	1.5	0.48	126	1.287	1.259	2.239	1.585	2.239	1.259	1.413	1.259	1.413	1.122	1.259
sub2	2014-04-06	47	1.5	0.48	126	3.881	5.012	6.31	5.012	5.623	3.548	5.012	3.548	4.467	3.162	3.548
sub2	2014-04-06	47	1.5	0.48	126	3.283	7.943	2.818	3.162	2.818	3.162	2.512	3.981	2.512	3.981	3.548
sub2	2014-04-06	47	1.5	0.48	126	3.368	2.512	3.162	2.818	4.467	3.548	3.981	1.995	5.012	2.512	3.162
sub2	2014-04-06	47	1.5	0.48	126	3.774	7.943	2.818	5.012	4.467	5.012	2.818	3.548	2.818	4.467	3.981
sub2	2014-04-06	47	1.5	0.48	126	2.612	2.512	3.162	2.239	2.512	2.239	2.512	1.778	3.162	2.818	3.162
sub2	2014-04-08	47	1.5	0.48	126	2.249	1.995	3.548	1.995	2.512	1.995	2.239	1.995	2.512	2.239	2.512
sub2	2014-04-08	47	1.5	0.48	126	3.37	3.162	3.981	3.548	3.981	3.548	3.981	3.162	3.548	2.818	3.162
sub2	2014-04-08	47	1.5	0.48	126	3.939	7.943	6.31	7.079	2.512	2.818	2.512	3.981	3.548	6.31	4.467
sub2	2014-04-08	47	1.5	0.48	126	3.37	5.012	6.31	3.548	4.467	3.162	3.548	2.818	3.981	3.162	3.548
sub2	2014-04-08	47	1.5	0.48	126	3.587	3.981	5.012	3.548	4.467	3.981	4.467	2.818	3.548	3.162	3.548
sub2	2014-04-08	47	1.5	0.48	126	3.37	7.943	2.239	2.512	1.995	3.548	2.818	3.981	3.162	3.548	3.162
sub2	2014-04-08	47	1.5	0.48	126	3.781	3.162	4.467	3.981	4.467	3.981	4.467	3.548	3.981	3.162	3.548
sub2	2014-04-08	47	1.5	0.48	126	3.781	5.012	6.31	3.981	4.467	3.162	3.981	3.548	4.467	3.548	3.981
sub2	2014-04-08	47	1.5	0.48	126	2.477	1.995	2.512	2.239	2.512	2.239	2.512	2.239	2.818	2.239	2.818
sub2	2014-04-08	47	1.5	0.48	126	3.973	3.981	5.012	3.981	5.623	5.012	5.623	2.512	3.981	3.162	3.548
sub2	2014-04-09	47	1.5	0.48	36	5.034	3.981	5.623	5.012	5.623	4.467	5.012	4.467	5.623	5.012	5.623
sub2	2014-04-09	47	1.5	0.48	36	3.125	3.981	5.012	3.981	5.012	2.818	3.162	2.512	3.548	3.162	3.548
sub2	2014-04-09	47	1.5	0.48	36	3.272	3.981	6.31	3.162	3.548	2.818	3.548	2.818	3.162	2.818	4.467
sub2	2014-04-09	47	1.5	0.48	36	3.564	5.012	6.31	4.467	5.012	3.548	3.981	3.162	3.548	3.162	3.981
sub2	2014-04-09	47	1.5	0.48	36	3.523	7.943	3.981	4.467	3.981	4.467	3.162	3.548	3.162	3.981	2.818
sub2	2014-04-09	47	1.5	0.48	126	3.402	3.162	3.981	2.818	3.162	2.818	4.467	3.162	3.981	2.818	3.162
sub2	2014-04-09	47	1.5	0.48	126	2.831	3.981	5.012	2.239	2.818	2.512	2.818	2.512	3.162	2.818	3.162
sub2	2014-04-09	47	1.5	0.48	126	1.907	7.943	1.995	2.239	1.585	1.778	1.413	2.239	1.995	2.239	1.778
sub2	2014-04-09	47	1.5	0.48	126	2.238	3.981	5.623	2.818	3.162	1.413	2.512	2.239	2.512	2.239	2.512
sub2	2014-04-09	47	1.5	0.48	126	2.758	3.162	3.981	2.239	2.818	2.512	3.548	1.995	2.818	2.512	3.162
sub3	2014-04-04	47	1.5	0.48	36	3.197	1.585	2.818	2.512	2.818	2.512	3.162	2.818	3.548	3.162	3.981
sub3	2014-04-04	47	1.5	0.48	36	2.813	5.012	6.31	3.162	3.548	2.239	2.818	2.512	2.818	2.512	3.981
sub3	2014-04-04	47	1.5	0.48	36	3.151	7.943	3.981	4.467	3.981	4.467	3.162	3.981	2.239	2.818	2.239
sub3	2014-04-04	47	1.5	0.48	36	3.492	3.981	5.012	4.467	5.012	3.548	3.981	3.162	3.548	3.162	3.548
sub3	2014-04-04	47	1.5	0.48	36	2.975	3.162	5.012	4.467	5.012	3.162	3.548	1.995	3.162	2.818	3.162
sub3	2014-04-04	47	1.5	0.48	36	5.365	3.981	5.012	3.981	5.012	4.467	6.31	5.623	6.31	4.467	5.012
sub3	2014-04-04	47	1.5	0.48	126	3.701	7.943	4.467	5.012	4.467	5.623	3.162	3.548	3.162	3.548	3.162
sub3	2014-04-04	47	1.5	0.48	126	2.494	3.981	5.012	2.512	2.818	2.239	3.162	2.512	2.818	1.995	2.239
sub3	2014-04-04	47	1.5	0.48	126	3.221	1.995	2.818	2.512	3.548	2.512	3.162	2.818	4.467	2.818	3.548
sub3	2014-04-04	47	1.5	0.48	126	3.201	1.995	2.818	1.995	2.512	2.239	3.548	3.162	3.548	3.162	3.548
sub3	2014-04-04	47	1.5	0.48	126	3.5	2.512	3.548	3.162	3.548	3.162	3.548	3.162	3.981	3.162	3.981
sub3	2014-04-04	47	1.5	0.48	126	2.699	3.981	6.31	3.162	3.548	2.239	3.162	2.818	3.162	1.995	2.818
sub3	2014-04-05	47	1.5	0.48	126	3.66	3.981	5.012	3.548	5.012	3.981	4.467	2.818	3.548	3.162	3.981
sub3	2014-04-05	47	1.5	0.48	126	2.665	1.995	2.512	1.995	2.818	2.512	2.818	2.512	2.818	2.512	2.818
sub3	2014-04-05	47	1.5	0.48	126	2.146	3.981	5.623	3.162	3.548	2.512	2.818	1.778	1.995	1.778	1.995
sub3	2014-04-05	47	1.5	0.48	126	1.786	2.512	3.162	2.818	3.162	1.585	1.778	1.585	1.995	1.778	1.995
sub3	2014-04-05	47	1.5	0.48	126	2.882	1.995	2.512	2.239	3.162	2.818	3.162	2.818	3.162	2.512	2.818
sub3	2014-04-05	47	1.5	0.48	126	3.434	5.012	6.31	3.548	3.981	3.548	3.981	3.162	3.548	2.818	3.548
sub3	2014-04-05	47	1.5	0.48	126	2.747	3.981	5.012	2.818	3.162	2.818	3.548	2.239	2.818	2.239	2.818
sub3	2014-04-05	47	1.5	0.48	126	3.645	3.981	5.012	3.548	5.012	3.981	4.467	3.162	3.548	3.162	3.548
sub3	2014-04-05	47	1.5	0.48	126	2.534	3.981	5.012	1.778	2.239	1.995	2.818	2.239	2.818	2.512	2.818
sub3	2014-04-05	47	1.5	0.48	126	3.415	3.162	3.981	2.818	4.467	3.981	4.467	3.162	3.548	2.512	2.818
sub3	2014-04-06	47	1.5	0.48	126	2.004	1.585	2.239	1.778	1.995	1.778	1.995	1.778	2.239	1.995	2.239
sub3	2014-04-06	47	1.5	0.48	126	1.903	2.512	3.548	1.995	2.239	1.995	2.239	1.585	1.778	1.585	2.239
sub3	2014-04-06	47	1.5	0.48	126	2.592	5.012	6.31	3.162	3.548	2.239	3.162	2.239	2.512	2.239	3.162
sub3	2014-04-06	47	1.5	0.48	126	1.653	1.995	2.512	1.585	1.778	1.585	1.778	1.413	1.778	1.585	1.778
sub3	2014-04-06	47	1.5	0.48	126	1.696	3.162	3.981	1.995	3.162	1.778	1.995	1.413	1.995	1.413	1.585
sub3	2014-04-06	47	1.5	0.48	126	2.453	3.162	3.981	3.162	3.548	3.162	3.548	1.995	2.239	1.778	1.995
sub3	2014-04-06	47	1.5	0.48	126	1.291	1.585	2.239	1.585	1.995	1	1.585	1.259	1.778	1	1.122
sub3	2014-04-06	47	1.5	0.48	126	1.396	2.512	3.162	1.778	1.995	1.413	1.585	1.259	1.413	1.122	1.585
sub3	2014-04-06	47	1.5	0.48	126	3.068	3.162	3.981	3.162	3.981	2.818	3.548	3.162	3.548	2.512	2.818
sub3	2014-04-06	47	1.5	0.48	126	1.918	1.259	1.778	1.413	1.585	1.259	1.995	1.778	2.239	1.995	2.239
sub3	2014-04-08	47	1.5	0.48	126	3.523	3.981	5.012	3.981	4.467	3.981	4.467	3.162	3.548	2.818	3.162
sub3	2014-04-08	47	1.5	0.48	126	1.573	1.995	2.512	1.778	2.239	1.995	2.239	1.122	1.413	1.259	1.413
sub3	2014-04-08	47	1.5	0.48	126	1.827	1	1.778	1.585	1.778	1.585	1.778	1.585	1.995	1.778	2.239
sub3	2014-04-08	47	1.5	0.48	126	3.414	3.981	5.623	5.012	5.623	4.467	5.012	2.512	2.818	2.512	3.162
sub3	2014-04-08	47	1.5	0.48	126	2.785	1.995	2.512	2.239	3.162	2.512	3.162	2.818	3.162	2.239	2.818
sub3	2014-04-08	47	1.5	0.48	126	3.078	7.943	4.467	5.012	4.467	5.012	3.162	3.548	2.239	2.512	1.995
sub3	2014-04-08	47	1.5	0.48	126	1.922	2.512	3.162	2.512	3.162	2.818	3.162	1.259	1.585	1.122	1.585
sub3	2014-04-08	47	1.5	0.48	126	3.076	2.512	3.548	2.512	2.818	2.512	3.981	2.818	3.162	2.818	3.162
sub3	2014-04-09	47	1.5	0.48	126	1.8	1.259	1.585	1.259	1.413	1.259	1.995	1.778	1.995	1.778	1.995
sub3	2014-04-09	47	1.5	0.48	126	2.396	1.585	1.995	1.778	2.818	2.512	2.818	1.995	2.818	1.995	2.239
sub3	2014-04-09	47	1.5	0.48	126	2.99	1.585	2.512	1.995	3.162	2.818	3.162	2.818	3.162	2.818	3.162
sub3	2014-04-09	47	1.5	0.48	126	3.434	5.012	6.31	3.548	3.981	3.548	3.981	3.162	3.548	2.818	3.548
sub3	2014-04-09	47	1.5	0.48	126	2.952	2.512	3.162	2.512	3.162	2.512	3.162	2.512	3.162	2.818	3.548
sub3	2014-04-09	47	1.5	0.48	126	2.271	1.259	1.995	1.778	2.239	1.995	2.239	1.995	3.162	1.995	2.239
sub3	2014-04-09	47	1.5	0.48	126	2.09	1.259	1.585	1.413	1.995	1.778	2.239	1.585	1.995	1.778	3.162
sub3	2014-04-09	47	1.5	0.48	126	1.863	3.981	5.012	2.239	2.512	1.995	2.239	1.585	1.778	1.585	1.995
sub3	2014-04-09	47	1.5	0.48	126	1.181	5.012	6.31	3.162	3.548	1.122	1.585	1	1.122	1	1.259
sub3	2014-04-09	47	1.5	0.48	126	2.248	1.995	3.162	1.995	2.818	1.413	2.512	2.239	2.512	1.995	2.818
sub3	2014-04-10	47	1.5	0.48	126	2.081	1.995	2.818	2.239	2.512	1.995	2.239	1.995	2.239	1.778	2.239
sub3	2014-04-10	47	1.5	0.48	126	2.907	3.162	3.981	3.548	3.981	3.162	3.548	2.818	3.162	2.239	2.512
sub3	2014-04-10	47	1.5	0.48	126	3.14	5.012	6.31	4.467	5.012	2.818	3.981	3.162	3.548	2.512	2.818
sub3	2014-04-10	47	1.5	0.48	126	1.396	1.585	1.995	1.778	1.995	1.413	1.585	1.259	1.413	1.122	1.585
sub3	2014-04-10	47	1.5	0.48	126	2.401	1.585	1.995	1.585	1.995	1.778	2.818	2.239	2.818	2.239	2.512
sub3	2014-04-10	47	1.5	0.48	126	2.677	2.512	3.162	2.512	2.818	2.239	2.818	2.512	3.162	2.512	2.818
sub3	2014-04-10	47	1.5	0.48	126	3.16	3.981	5.012	4.467	5.012	3.548	4.467	3.162	3.548	1.995	2.239
sub3	2014-04-10	47	1.5	0.48	126	2.331	3.981	5.012	3.162	4.467	2.818	3.162	1.778	2.818	1.413	1.995
sub3	2014-04-10	47	1.5	0.48	126	2.126	1.585	2.239	1.995	2.512	1.995	2.239	1.995	2.239	1.778	2.512
sub3	2014-04-10	47	1.5	0.48	126	2.05	3.162	4.467	1.995	3.162	1.778	1.995	1.778	2.239	1.995	2.512
sub3	2014-04-11	47	1.5	0.48	36	2.78	3.162	3.981	2.818	3.162	2.512	3.162	2.512	2.818	2.512	3.162
sub3	2014-04-11	47	1.5	0.48	36	2.62	2.512	3.548	2.512	3.162	2.239	2.818	2.512	2.818	2.512	2.818
sub3	2014-04-11	47	1.5	0.48	36	2.619	5.012	6.31	3.548	3.981	2.818	3.548	2.512	2.818	1.778	2.239
sub3	2014-04-11	47	1.5	0.48	36	1.775	1.995	2.512	2.239	2.512	1.778	2.512	1.585	1.778	1.413	1.585
sub3	2014-04-11	47	1.5	0.48	36	2.191	3.162	3.981	2.512	2.818	2.239	2.818	1.995	2.512	1.585	1.995
sub3	2014-04-11	47	1.5	0.48	126	2.101	3.162	3.981	2.818	3.162	2.239	2.818	1.778	1.995	1.778	1.995
sub3	2014-04-11	47	1.5	0.48	126	2.32	3.981	5.012	3.548	3.981	2.512	2.818	2.239	3.162	1.413	1.778
sub3	2014-04-11	47	1.5	0.48	126	1.319	2.512	3.162	2.818	3.162	1.122	1.413	1.122	1.413	1.259	1.585
sub3	2014-04-11	47	1.5	0.48	126	2.591	3.981	5.012	4.467	5.012	2.818	3.162	2.512	2.818	1.995	2.239
sub3	2014-04-11	47	1.5	0.48	126	2.408	3.981	5.012	2.818	3.548	1.995	2.239	1.995	2.818	2.239	3.162
sub4	2014-04-10	47	1.5	0.48	36	6.137	7.943	4.467	5.623	4.467	7.943	5.623	6.31	5.623	6.31	5.012
sub4	2014-04-10	47	1.5	0.48	36	2.676	3.981	5.012	3.548	3.981	2.239	2.512	1.778	3.162	2.818	3.548
sub4	2014-04-10	47	1.5	0.48	36	5.058	5.012	6.31	5.012	6.31	4.467	5.012	4.467	5.623	4.467	6.31
sub4	2014-04-10	47	1.5	0.48	36	5.454	7.943	6.31	7.943	7.079	7.943	5.012	6.31	4.467	5.012	3.981
sub4	2014-04-10	47	1.5	0.48	36	4.162	7.943	3.162	4.467	3.548	3.981	3.548	4.467	3.981	5.012	3.981
sub4	2014-04-10	47	1.5	0.48	36	4.412	7.943	5.623	6.31	5.623	6.31	5.012	5.623	3.162	3.548	2.818
sub4	2014-04-10	47	1.5	0.48	126	4.261	5.012	6.31	3.548	5.012	4.467	5.012	3.548	3.981	3.548	5.012
sub4	2014-04-10	47	1.5	0.48	126	4.492	7.943	6.31	7.079	5.012	5.623	5.012	5.623	3.162	3.981	3.548
sub4	2014-04-10	47	1.5	0.48	126	2.094	1.585	2.239	1.995	2.239	1.995	2.239	1.585	2.239	1.995	2.512
sub4	2014-04-10	47	1.5	0.48	126	5.169	3.981	6.31	3.981	4.467	3.981	5.623	5.012	5.623	4.467	6.31
sub4	2014-04-10	47	1.5	0.48	126	5.196	1.995	2.512	2.239	5.623	5.012	5.623	4.467	5.012	3.981	7.079
sub4	2014-04-10	47	1.5	0.48	126	3.255	3.981	5.012	4.467	5.012	3.162	3.981	3.162	3.548	2.512	3.162
sub4	2014-04-12	47	1.5	0.48	36	4.742	3.981	5.012	3.981	4.467	2.512	5.012	3.981	6.31	5.012	5.623
sub4	2014-04-12	47	1.5	0.48	36	3.262	3.981	5.012	3.548	4.467	3.548	3.981	3.162	3.548	2.512	2.818
sub4	2014-04-12	47	1.5	0.48	36	4.152	5.012	7.079	5.623	6.31	3.981	4.467	3.548	4.467	3.981	4.467
sub4	2014-04-12	47	1.5	0.48	36	3.999	7.943	3.981	4.467	3.548	3.981	3.548	4.467	3.981	4.467	3.548
sub4	2014-04-12	47	1.5	0.48	36	4.315	3.981	5.012	3.981	4.467	3.981	4.467	3.981	4.467	3.981	5.012
sub4	2014-04-12	47	1.5	0.48	36	5.432	3.981	7.079	5.623	6.31	5.012	5.623	5.012	5.623	5.012	6.31
sub4	2014-04-12	47	1.5	0.48	36	5.777	5.012	6.31	5.012	7.079	6.31	7.079	5.012	5.623	5.012	5.623
sub4	2014-04-12	47	1.5	0.48	36	4.516	3.162	3.981	3.548	4.467	3.981	4.467	3.548	5.012	4.467	5.623
sub4	2014-04-12	47	1.5	0.48	36	5.648	5.012	6.31	5.623	6.31	5.623	6.31	5.012	5.623	5.012	6.31
sub4	2014-04-12	47	1.5	0.48	36	4.224	3.162	4.467	3.548	5.623	3.981	4.467	3.981	4.467	3.981	4.467
sub4	2014-04-13	47	1.5	0.48	36	3.507	5.012	6.31	3.548	5.012	3.162	3.981	3.548	3.981	2.818	3.548
sub4	2014-04-13	47	1.5	0.48	36	4.35	3.981	5.012	4.467	5.012	4.467	5.012	3.981	4.467	3.162	5.012
sub4	2014-04-13	47	1.5	0.48	36	3.029	2.512	3.162	2.818	3.548	3.162	3.548	3.162	3.548	2.239	2.512
sub4	2014-04-13	47	1.5	0.48	36	3.846	5.012	6.31	3.548	3.981	3.548	3.981	3.548	4.467	3.548	3.981
sub4	2014-04-13	47	1.5	0.48	36	4.217	5.012	6.31	5.012	5.623	5.012	5.623	3.162	3.981	2.512	5.012
sub4	2014-04-13	47	1.5	0.48	36	4.106	3.162	3.981	2.818	3.981	3.548	4.467	3.981	5.012	3.162	4.467
sub4	2014-04-13	47	1.5	0.48	36	3.241	5.012	6.31	4.467	5.012	2.818	3.548	3.162	3.548	2.818	3.548
sub4	2014-04-13	47	1.5	0.48	36	3.7	3.162	3.981	3.548	3.981	3.162	3.981	3.548	3.981	3.548	3.981
sub4	2014-04-13	47	1.5	0.48	36	3.927	3.162	3.981	3.548	3.981	3.548	4.467	3.548	3.981	3.548	4.467
sub4	2014-04-13	47	1.5	0.48	36	2.315	7.943	2.239	2.512	1.778	2.239	1.778	2.818	2.239	2.818	1.995
sub4	2014-04-14	47	1.5	0.48	36	2.779	7.943	3.548	4.467	3.981	4.467	1.995	2.239	1.995	3.162	2.818
sub4	2014-04-14	47	1.5	0.48	36	2.436	1.259	1.778	1.585	3.162	2.818	3.548	1.778	2.239	1.995	2.239
sub4	2014-04-14	47	1.5	0.48	36	2.426	7.943	3.162	3.548	1.995	2.818	2.239	2.512	2.239	2.512	2.239
sub4	2014-04-14	47	1.5	0.48	36	3.369	3.981	5.012	2.239	2.512	1.995	3.981	3.548	3.981	3.162	3.548
sub4	2014-04-14	47	1.5	0.48	36	3.619	7.943	2.818	3.548	2.239	4.467	3.981	4.467	2.818	3.162	2.818
sub4	2014-04-14	47	1.5	0.48	36	3.846	3.162	3.981	3.548	3.981	3.548	3.981	3.548	4.467	3.548	3.981
sub4	2014-04-14	47	1.5	0.48	36	2.631	2.512	3.162	2.239	2.512	2.239	2.818	2.512	2.818	2.239	3.162
sub4	2014-04-14	47	1.5	0.48	36	2.482	2.512	3.162	2.818	3.162	1.995	2.239	1.778	2.818	2.512	3.548
sub4	2014-04-14	47	1.5	0.48	36	3.364	2.512	3.548	3.162	3.548	2.512	3.162	2.512	3.981	3.548	4.467
sub4	2014-04-14	47	1.5	0.48	36	2.785	3.981	5.012	2.239	2.818	2.239	3.162	2.818	3.162	2.512	2.818
sub4	2014-04-15	47	1.5	0.48	36	2.431	1.585	2.818	2.239	2.818	2.512	2.818	1.995	2.512	2.239	2.512
sub4	2014-04-15	47	1.5	0.48	36	4.18	3.981	5.012	4.467	5.623	3.548	3.981	3.548	5.012	3.981	5.012
sub4	2014-04-15	47	1.5	0.48	36	3.176	3.981	5.012	4.467	5.012	3.162	3.548	2.818	3.548	2.818	3.162
sub4	2014-04-15	47	1.5	0.48	36	4.184	7.943	5.623	6.31	5.623	6.31	3.981	4.467	3.548	3.981	2.818
sub4	2014-04-15	47	1.5	0.48	36	3.247	3.162	3.981	2.512	2.818	2.512	3.548	3.162	3.548	3.162	3.548
sub4	2014-04-15	47	1.5	0.48	36	2.512	3.162	3.981	2.512	2.818	2.512	3.548	1.995	2.512	1.995	2.512
sub4	2014-04-15	47	1.5	0.48	36	2.34	1.585	2.512	2.239	2.512	2.239	2.818	2.239	2.512	1.995	2.239
sub4	2014-04-15	47	1.5	0.48	36	4.862	3.981	5.012	4.467	5.012	3.981	5.012	4.467	5.623	4.467	5.623
sub4	2014-04-15	47	1.5	0.48	36	4.247	7.943	6.31	7.079	3.981	5.012	4.467	5.012	3.162	5.012	2.818
sub4	2014-04-15	47	1.5	0.48	36	2.417	3.981	5.012	1.778	2.512	1.995	3.162	2.512	2.818	1.778	2.239
sub4	2014-04-16	47	1.5	0.48	36	3.157	2.512	3.548	2.818	3.162	2.818	3.162	2.818	4.467	2.512	3.162
sub4	2014-04-16	47	1.5	0.48	36	2.484	7.943	3.981	4.467	2.818	3.162	2.239	2.512	2.239	2.512	2.239
sub4	2014-04-16	47	1.5	0.48	36	3.628	3.162	3.981	3.548	3.981	3.548	3.981	3.548	3.981	3.162	3.548
sub4	2014-04-16	47	1.5	0.48	36	2.094	1.995	2.818	2.512	2.818	1.413	1.995	1.585	2.512	2.239	2.818
sub4	2014-04-16	47	1.5	0.48	36	3.934	2.512	3.548	3.162	3.548	3.162	4.467	3.981	4.467	3.548	3.981
sub4	2014-04-16	47	1.5	0.48	36	3.298	1.995	2.512	2.239	3.548	2.818	3.548	3.162	3.548	3.162	3.548
sub4	2014-04-16	47	1.5	0.48	36	3.242	3.162	5.623	3.548	4.467	3.981	4.467	2.512	2.818	2.512	3.162
sub4	2014-04-16	47	1.5	0.48	36	4.482	5.012	6.31	5.012	5.623	4.467	5.623	4.467	5.623	3.162	3.548
sub4	2014-04-16	47	1.5	0.48	36	5.067	3.981	5.012	4.467	5.623	5.012	5.623	3.981	6.31	4.467	5.012
sub4	2014-04-16	47	1.5	0.48	36	2.612	7.943	4.467	5.012	2.818	3.162	2.818	3.162	2.239	2.512	1.778
sub4	2014-04-17	47	1.5	0.48	36	3.387	7.943	4.467	5.012	3.981	4.467	3.548	4.467	2.512	2.818	2.512
sub4	2014-04-17	47	1.5	0.48	36	2.85	7.943	3.548	3.981	2.239	2.512	2.239	3.162	2.818	3.548	2.818
sub4	2014-04-17	47	1.5	0.48	36	3.234	3.162	3.981	2.818	3.548	3.162	3.548	3.162	3.548	2.818	3.162
sub4	2014-04-17	47	1.5	0.48	36	3.394	3.981	5.012	3.548	3.981	2.818	3.548	3.162	3.548	2.818	4.467
sub4	2014-04-17	47	1.5	0.48	36	1.99	3.162	3.981	2.818	3.162	2.239	2.512	1.585	1.778	1.585	2.239
sub4	2014-04-17	47	1.5	0.48	126	1.319	3.162	3.981	1.122	1.585	1.259	1.413	1.122	1.413	1.122	1.585
sub4	2014-04-17	47	1.5	0.48	126	4.953	5.012	7.079	4.467	5.012	3.981	5.623	5.012	5.623	4.467	5.012
sub4	2014-04-17	47	1.5	0.48	126	4.598	7.943	4.467	5.012	4.467	5.012	3.981	5.012	3.981	5.623	3.981
sub4	2014-04-17	47	1.5	0.48	126	3.798	3.981	5.012	3.162	3.548	3.162	4.467	3.981	4.467	3.162	3.548
sub4	2014-04-17	47	1.5	0.48	126	2.454	3.162	3.981	2.239	2.512	1.995	2.239	1.995	3.162	2.512	2.818
sub5	2014-04-12	47	1.5	0.48	36	6.196	12.589	4.467	8.913	7.943	8.913	5.012	6.31	5.623	6.31	5.012
sub5	2014-04-12	47	1.5	0.48	36	5.966	10	7.079	7.943	4.467	6.31	5.623	6.31	5.623	6.31	5.623
sub5	2014-04-12	47	1.5	0.48	36	4.315	7.943	5.623	6.31	5.623	6.31	4.467	5.012	2.818	4.467	2.818
sub5	2014-04-12	47	1.5	0.48	36	3.765	5.012	6.31	3.548	3.981	3.548	3.981	3.548	3.981	3.548	3.981
sub5	2014-04-12	47	1.5	0.48	36	4.121	7.943	4.467	5.012	3.981	4.467	3.981	4.467	2.818	5.012	3.981
sub5	2014-04-12	47	1.5	0.48	36	4.224	10	7.079	7.943	6.31	7.943	3.548	3.981	3.162	3.548	3.162
sub5	2014-04-12	47	1.5	0.48	126	5.456	3.981	5.623	5.012	5.623	4.467	6.31	5.012	5.623	5.012	6.31
sub5	2014-04-12	47	1.5	0.48	126	4.76	3.981	5.012	4.467	5.012	4.467	5.623	3.981	5.012	4.467	5.012
sub5	2014-04-12	47	1.5	0.48	126	5.034	10	4.467	5.623	4.467	5.012	4.467	5.623	5.012	5.623	4.467
sub5	2014-04-12	47	1.5	0.48	126	4.396	5.012	6.31	4.467	6.31	4.467	5.012	3.981	4.467	3.981	4.467
sub5	2014-04-12	47	1.5	0.48	126	3.918	3.981	5.012	3.981	5.012	3.981	4.467	3.548	3.981	3.548	3.981
sub5	2014-04-12	47	1.5	0.48	126	3.18	10	5.623	6.31	3.548	3.981	3.548	3.981	2.239	2.818	2.512
sub5	2014-04-14	47	1.5	0.48	126	4.578	3.981	5.012	3.981	4.467	3.981	4.467	3.548	3.981	3.548	7.943
sub5	2014-04-14	47	1.5	0.48	126	5.318	7.943	4.467	5.012	3.981	5.623	5.012	5.623	5.012	5.623	5.012
sub5	2014-04-14	47	1.5	0.48	126	4.11	5.012	6.31	3.981	4.467	3.981	5.623	3.548	3.981	3.548	3.981
sub5	2014-04-14	47	1.5	0.48	126	3.602	3.981	6.31	4.467	5.623	3.981	4.467	2.818	3.548	2.818	3.981
sub5	2014-04-14	47	1.5	0.48	126	4.269	7.943	3.981	4.467	3.162	4.467	3.981	5.012	3.981	5.012	3.162
sub5	2014-04-14	47	1.5	0.48	126	4.015	5.012	6.31	5.012	5.623	3.548	4.467	3.981	4.467	3.162	4.467
sub5	2014-04-14	47	1.5	0.48	126	4.17	5.012	6.31	3.981	5.012	4.467	5.012	3.548	3.981	3.548	4.467
sub5	2014-04-14	47	1.5	0.48	126	4.624	3.981	5.623	3.981	4.467	3.162	5.012	4.467	5.623	4.467	5.012
sub5	2014-04-14	47	1.5	0.48	126	4.687	5.012	6.31	3.548	3.981	3.548	6.31	3.162	5.012	4.467	5.623
sub5	2014-04-15	47	1.5	0.48	126	3.394	2.512	3.548	2.818	3.162	2.818	3.548	3.162	4.467	2.818	3.548
sub5	2014-04-15	47	1.5	0.48	126	2.882	1.259	2.239	1.995	3.162	2.818	3.162	2.818	3.162	2.512	2.818
sub5	2014-04-15	47	1.5	0.48	126	3.242	2.512	3.548	3.162	3.548	2.512	2.818	2.512	3.981	3.162	4.467
sub5	2014-04-15	47	1.5	0.48	126	3.765	5.012	7.943	3.981	5.623	3.548	3.981	3.548	3.981	3.548	3.981
sub5	2014-04-15	47	1.5	0.48	126	2.929	7.943	3.981	4.467	3.548	3.981	3.548	5.012	1.778	1.995	1.259
sub5	2014-04-15	47	1.5	0.48	126	3.355	2.512	3.162	2.818	3.981	3.162	3.548	3.162	3.548	3.162	3.548
sub5	2014-04-15	47	1.5	0.48	126	3.636	2.512	3.548	3.162	3.548	3.162	3.981	3.162	3.981	3.548	3.981
sub5	2014-04-15	47	1.5	0.48	126	1.972	1.585	1.995	1.585	1.778	1.585	1.995	1.778	2.239	1.995	2.239
sub5	2014-04-15	47	1.5	0.48	126	4.017	3.981	5.012	3.981	5.012	3.548	4.467	3.548	3.981	3.548	5.012
sub5	2014-04-15	47	1.5	0.48	126	3.37	1.995	3.981	3.548	4.467	3.548	3.981	3.162	3.548	2.818	3.162
sub5	2014-04-16	47	1.5	0.48	126	2.431	1.585	2.239	1.995	2.818	2.512	2.818	2.239	2.512	1.995	2.512
sub5	2014-04-16	47	1.5	0.48	126	3.716	7.943	5.623	6.31	4.467	5.623	3.162	3.548	3.162	3.981	2.818
sub5	2014-04-16	47	1.5	0.48	126	3.043	1.259	1.585	1.413	2.818	2.512	2.818	2.239	3.548	3.162	3.981
sub5	2014-04-16	47	1.5	0.48	126	2.366	5.012	7.079	4.467	5.623	2.512	2.818	2.512	3.162	1.413	1.778
sub5	2014-04-16	47	1.5	0.48	126	3.37	2.512	3.548	2.818	3.162	2.818	3.548	3.162	3.981	3.162	3.548
sub5	2014-04-16	47	1.5	0.48	126	3.248	2.512	3.162	2.818	3.162	2.818	3.162	2.818	3.548	3.162	3.981
sub5	2014-04-16	47	1.5	0.48	126	2.866	3.162	3.981	3.162	4.467	3.162	3.548	2.818	3.162	1.995	2.512
sub5	2014-04-16	47	1.5	0.48	126	4.722	5.012	6.31	3.548	3.981	3.548	6.31	3.981	5.012	4.467	5.012
sub5	2014-04-16	47	1.5	0.48	126	3.774	5.012	6.31	5.623	6.31	3.981	5.012	2.818	3.548	2.818	4.467
sub5	2014-04-16	47	1.5	0.48	126	3.201	1.995	4.467	3.548	4.467	3.162	3.548	3.162	3.548	2.239	3.548
sub5	2014-04-17	47	1.5	0.48	126	4.881	5.012	6.31	4.467	5.623	5.012	5.623	5.012	5.623	3.548	4.467
sub5	2014-04-17	47	1.5	0.48	126	4.306	7.943	6.31	7.943	5.623	6.31	3.981	4.467	3.548	3.981	3.548
sub5	2014-04-17	47	1.5	0.48	126	3.557	7.943	4.467	6.31	3.981	5.012	3.548	3.981	2.818	3.162	2.818
sub5	2014-04-17	47	1.5	0.48	126	2.895	7.943	3.548	3.981	2.818	3.162	2.512	2.818	2.512	3.548	2.818
sub5	2014-04-17	47	1.5	0.48	126	2.372	1.995	2.512	2.239	2.512	2.239	2.818	1.995	2.239	1.778	3.162
sub5	2014-04-17	47	1.5	0.48	126	4.298	1.995	2.818	2.512	3.548	3.162	3.548	3.162	5.623	3.981	6.31
sub5	2014-04-17	47	1.5	0.48	126	4.568	5.012	6.31	4.467	5.012	4.467	5.012	4.467	5.012	3.981	4.467
sub5	2014-04-17	47	1.5	0.48	126	4.201	7.943	4.467	5.623	5.012	5.623	5.012	5.623	3.162	3.548	2.239
sub5	2014-04-17	47	1.5	0.48	126	3.523	3.162	3.981	2.818	3.162	2.818	3.981	3.162	3.548	3.162	4.467
sub5	2014-04-17	47	1.5	0.48	126	2.317	1.585	2.239	1.778	2.818	2.239	2.512	1.778	2.239	1.585	3.548
sub5	2014-04-19	47	1.5	0.48	126	4.805	5.012	6.31	5.623	6.31	5.623	6.31	3.981	4.467	3.981	4.467
sub5	2014-04-19	47	1.5	0.48	126	2.443	2.512	3.162	2.818	3.162	1.995	2.512	2.239	2.512	2.239	3.162
sub5	2014-04-19	47	1.5	0.48	126	2.843	2.512	3.162	2.818	3.162	2.512	3.162	2.818	3.162	2.239	3.162
sub5	2014-04-19	47	1.5	0.48	126	3.385	1.995	2.818	2.512	3.162	2.818	3.981	2.818	3.548	3.162	3.981
sub5	2014-04-19	47	1.5	0.48	126	3.934	3.162	3.981	3.162	3.981	3.162	3.981	3.548	4.467	3.981	4.467
sub5	2014-04-19	47	1.5	0.48	126	4.441	7.943	4.467	5.012	4.467	5.012	4.467	5.012	3.981	5.012	3.162
sub5	2014-04-19	47	1.5	0.48	126	3.247	1.995	3.981	3.162	3.548	3.162	3.548	3.162	3.548	2.512	3.548
sub5	2014-04-19	47	1.5	0.48	126	2.599	2.512	3.981	3.162	3.548	2.239	2.512	2.239	2.818	2.239	3.548
sub5	2014-04-19	47	1.5	0.48	126	2.59	3.981	5.623	3.162	3.548	3.162	3.548	1.778	2.239	1.995	2.818
sub5	2014-04-19	47	1.5	0.48	126	3.401	7.943	6.31	7.079	4.467	5.623	2.818	3.162	2.818	3.162	2.818
sub5	2014-04-20	47	1.5	0.48	36	4.76	5.012	7.079	5.623	6.31	5.012	5.623	4.467	5.012	3.981	4.467
sub5	2014-04-20	47	1.5	0.48	36	4.589	10	4.467	5.012	4.467	5.012	4.467	5.623	3.981	4.467	3.981
sub5	2014-04-20	47	1.5	0.48	36	5.046	5.012	6.31	5.012	5.623	5.012	6.31	4.467	5.012	4.467	5.012
sub5	2014-04-20	47	1.5	0.48	36	3.7	5.012	6.31	3.162	3.548	3.162	3.981	3.548	3.981	3.548	3.981
sub5	2014-04-20	47	1.5	0.48	36	2.462	2.512	3.548	2.239	2.512	2.239	3.548	2.239	2.512	1.995	2.239
sub5	2014-04-20	47	1.5	0.48	126	1.758	1.585	1.995	1.585	1.995	1.585	1.778	1.585	2.239	1.585	1.778
sub5	2014-04-20	47	1.5	0.48	126	3.636	3.162	3.981	3.548	3.981	3.162	3.981	3.162	3.981	3.548	3.981
sub5	2014-04-20	47	1.5	0.48	126	2.895	2.512	3.162	2.818	3.162	2.818	3.162	2.512	2.818	2.512	3.548
sub5	2014-04-20	47	1.5	0.48	126	3.415	1.259	1.995	1.778	4.467	3.981	4.467	3.162	3.548	2.512	2.818
sub5	2014-04-20	47	1.5	0.48	126	3.313	2.512	4.467	3.162	3.548	3.162	3.548	2.818	3.981	2.818	3.548
sub6	2014-04-13	47	1.5	0.48	36	3.953	3.981	5.012	4.467	5.012	4.467	5.012	3.548	3.981	3.162	3.548
sub6	2014-04-13	47	1.5	0.48	36	3.427	5.012	6.31	3.548	3.981	3.162	3.548	3.162	3.548	3.162	3.981
sub6	2014-04-13	47	1.5	0.48	36	3.522	5.012	6.31	3.162	3.548	2.818	3.162	2.239	4.467	3.981	4.467
sub6	2014-04-13	47	1.5	0.48	36	1.56	1.995	2.512	1.995	2.239	1.585	1.778	1.413	1.585	1.413	1.585
sub6	2014-04-13	47	1.5	0.48	36	3.762	5.012	6.31	4.467	5.012	3.981	4.467	3.981	4.467	2.512	3.162
sub6	2014-04-13	47	1.5	0.48	36	2.507	2.512	5.012	3.548	3.981	2.512	3.548	2.239	2.512	1.995	2.239
sub6	2014-04-13	47	1.5	0.48	126	4.025	2.512	3.981	3.548	3.981	3.548	3.981	3.162	4.467	3.981	5.012
sub6	2014-04-13	47	1.5	0.48	126	3.587	3.981	5.012	3.548	3.981	3.548	3.981	3.548	4.467	2.818	3.162
sub6	2014-04-13	47	1.5	0.48	126	2.591	5.012	6.31	5.623	6.31	2.818	3.162	2.239	2.512	1.995	2.818
sub6	2014-04-13	47	1.5	0.48	126	2.946	3.981	5.012	3.548	3.981	2.818	3.162	2.818	3.548	2.512	2.818
sub6	2014-04-13	47	1.5	0.48	126	3.741	3.162	3.981	3.548	3.981	3.548	4.467	3.981	4.467	2.818	3.162
sub6	2014-04-13	47	1.5	0.48	126	2.952	5.012	6.31	5.623	6.31	2.818	3.162	2.512	3.548	2.512	3.162
sub6	2014-04-14	47	1.5	0.48	36	1.972	3.981	5.012	3.162	3.548	1.995	2.239	1.995	2.239	1.585	1.778
sub6	2014-04-14	47	1.5	0.48	36	4.178	3.162	4.467	3.981	4.467	3.162	5.012	3.981	4.467	3.981	4.467
sub6	2014-04-14	47	1.5	0.48	36	2.375	3.981	5.012	2.512	2.818	2.239	2.512	2.239	2.512	2.239	2.512
sub6	2014-04-14	47	1.5	0.48	36	2.99	3.162	4.467	3.981	5.012	2.818	3.162	2.818	3.162	2.818	3.162
sub6	2014-04-14	47	1.5	0.48	36	2.337	1.995	2.818	2.512	2.818	2.512	2.818	2.512	2.818	1.585	1.778
sub6	2014-04-14	47	1.5	0.48	36	2.407	1.995	2.512	1.995	2.239	1.995	2.239	1.995	2.239	1.995	3.981
sub6	2014-04-14	47	1.5	0.48	36	2.734	1.995	3.162	2.818	3.981	2.818	3.162	2.512	3.162	2.239	2.512
sub6	2014-04-14	47	1.5	0.48	36	3.038	5.012	6.31	3.548	3.981	3.548	4.467	2.818	3.162	1.995	2.239
sub6	2014-04-14	47	1.5	0.48	36	3.161	3.162	3.981	3.548	3.981	2.818	3.162	2.818	3.162	1.995	5.012
sub6	2014-04-14	47	1.5	0.48	36	3.241	2.512	3.981	2.818	3.162	2.818	3.548	2.818	3.548	3.162	3.548
sub6	2014-04-15	47	1.5	0.48	36	4.84	7.943	6.31	7.079	5.012	5.623	4.467	5.012	4.467	6.31	3.162
sub6	2014-04-15	47	1.5	0.48	36	3.492	5.012	7.079	5.623	6.31	3.548	3.981	3.162	3.548	3.162	3.548
sub6	2014-04-15	47	1.5	0.48	36	3.368	5.012	6.31	4.467	5.623	4.467	5.012	2.239	2.818	2.512	3.162
sub6	2014-04-15	47	1.5	0.48	36	2.031	1.259	1.778	1.259	1.778	1.585	1.995	1.585	2.512	1.995	2.512
sub6	2014-04-15	47	1.5	0.48	36	2.785	1.995	3.162	2.512	3.162	2.239	2.818	2.512	3.162	2.818	3.162
sub6	2014-04-15	47	1.5	0.48	36	1.92	1	1.585	1.413	1.585	1.413	1.778	1.585	2.512	1.995	2.239
sub6	2014-04-15	47	1.5	0.48	36	2.09	1.259	2.239	1.778	1.995	1.778	2.512	1.778	2.239	1.995	2.239
sub6	2014-04-15	47	1.5	0.48	36	2.3	1.995	2.512	2.239	2.512	1.995	2.239	1.995	2.818	2.239	2.512
sub6	2014-04-15	47	1.5	0.48	36	1.679	1.995	2.512	2.239	2.512	1.995	2.239	1.413	1.585	1.259	1.585
sub6	2014-04-15	47	1.5	0.48	36	1.682	3.162	3.981	2.512	2.818	2.239	2.512	1.259	1.413	1.259	1.413
sub6	2014-04-16	47	1.5	0.48	36	2.163	1.259	1.995	1.778	2.239	1.995	2.512	1.995	2.239	1.995	2.239
sub6	2014-04-16	47	1.5	0.48	36	3.369	2.512	3.162	2.818	3.162	2.239	3.162	2.818	3.981	3.548	4.467
sub6	2014-04-16	47	1.5	0.48	36	2.946	2.512	3.162	2.818	3.162	2.818	3.162	2.818	3.548	2.512	2.818
sub6	2014-04-16	47	1.5	0.48	36	2.902	3.981	5.012	1.995	2.239	1.778	3.162	2.512	3.981	2.818	3.162
sub6	2014-04-16	47	1.5	0.48	36	2.471	1.995	2.512	2.239	2.512	1.585	2.512	2.239	2.818	2.512	3.162
sub6	2014-04-16	47	1.5	0.48	36	1.79	1	1.259	0.891	1.995	1.778	1.995	1.778	1.995	1.413	1.778
sub6	2014-04-16	47	1.5	0.48	36	1.972	3.981	5.012	1.778	2.239	1.778	1.995	1.585	2.239	1.995	2.239
sub6	2014-04-16	47	1.5	0.48	36	3.017	2.512	3.548	3.162	3.548	2.512	2.818	2.512	3.548	3.162	3.548
sub6	2014-04-16	47	1.5	0.48	36	2.155	3.981	5.012	4.467	5.012	2.239	2.818	1.778	2.512	1.585	1.995
sub6	2014-04-16	47	1.5	0.48	36	1.679	1.585	1.995	1.122	1.585	1.259	1.585	1.413	1.995	1.585	2.239
sub6	2014-04-18	47	1.5	0.48	36	2.843	2.512	3.981	3.162	3.548	2.512	3.162	2.239	3.162	2.818	3.162
sub6	2014-04-18	47	1.5	0.48	36	3.061	3.981	5.012	3.162	3.548	3.162	3.548	2.818	3.162	2.512	3.162
sub6	2014-04-18	47	1.5	0.48	36	2.785	2.512	3.162	2.512	3.162	2.818	3.162	2.818	3.162	2.239	2.512
sub6	2014-04-18	47	1.5	0.48	36	1.282	1	1.259	1.122	1.413	1	1.259	1.122	1.413	1.122	1.778
sub6	2014-04-18	47	1.5	0.48	36	2.536	3.981	5.012	2.818	3.162	2.512	3.548	2.512	2.818	1.585	2.239
sub6	2014-04-18	47	1.5	0.48	36	3.14	2.512	3.162	2.818	3.548	2.818	3.981	3.162	3.548	2.512	2.818
sub6	2014-04-18	47	1.5	0.48	36	2.604	3.981	5.623	2.818	3.162	2.818	3.548	1.995	2.512	2.239	2.512
sub6	2014-04-18	47	1.5	0.48	36	3.838	3.162	3.981	3.162	3.548	3.162	3.548	3.162	3.981	3.548	5.623
sub6	2014-04-18	47	1.5	0.48	36	1.551	1.995	2.818	1.778	1.995	1.413	1.585	1.122	1.778	1.413	1.995
sub6	2014-04-18	47	1.5	0.48	36	2.569	2.512	3.162	2.512	2.818	2.512	2.818	2.512	2.818	2.239	2.512
sub6	2014-04-20	47	1.5	0.48	36	2.004	2.512	3.548	2.512	2.818	1.778	2.239	1.995	2.239	1.778	1.995
sub6	2014-04-20	47	1.5	0.48	36	2.012	1.259	2.239	1.995	2.818	2.512	3.162	1.585	1.778	1.259	1.778
sub6	2014-04-20	47	1.5	0.48	36	2.191	2.512	3.162	2.512	2.818	2.512	2.818	1.995	2.239	1.585	1.995
sub6	2014-04-20	47	1.5	0.48	36	1.834	2.512	3.162	2.512	2.818	1.995	2.239	1.778	1.995	1.413	1.585
sub6	2014-04-20	47	1.5	0.48	36	1.65	1.259	1.585	1.413	2.239	1.995	2.239	1.413	1.585	1.259	1.413
sub6	2014-04-20	47	1.5	0.48	36	2.049	7.943	2.818	3.548	2.818	3.162	1.778	1.995	1.585	1.995	1.778
sub6	2014-04-20	47	1.5	0.48	36	1.245	1	1.259	1.122	1.259	1.122	1.259	1.122	1.585	1.122	1.259
sub6	2014-04-20	47	1.5	0.48	36	1.566	1.259	1.778	1.413	1.778	1.585	1.778	1.585	1.778	1.259	1.413
sub6	2014-04-20	47	1.5	0.48	36	2.504	2.512	3.162	2.239	2.818	2.512	2.818	2.512	3.162	1.778	2.239
sub6	2014-04-20	47	1.5	0.48	36	1.689	1.585	1.995	1.778	1.995	1.585	1.995	1.585	1.778	1.413	1.778
sub6	2014-04-21	47	1.5	0.48	36	1.444	3.981	5.012	1.413	1.585	1.413	1.585	1.413	1.585	1.259	1.413
sub6	2014-04-21	47	1.5	0.48	36	1.718	3.981	5.012	1.995	2.512	1.585	1.778	1.585	1.995	1.585	1.778
sub6	2014-04-21	47	1.5	0.48	36	2.136	1.995	2.512	1.778	1.995	1.778	1.995	1.778	2.512	2.239	2.512
sub6	2014-04-21	47	1.5	0.48	36	2.008	3.162	3.981	1.995	2.239	1.995	2.239	1.995	2.239	1.585	1.995
sub6	2014-04-21	47	1.5	0.48	36	1.293	1	1.259	1.122	1.259	1	1.413	1.259	1.413	1.259	1.413
sub6	2014-04-21	47	1.5	0.48	126	2.728	5.012	6.31	2.818	3.162	2.818	3.162	2.239	2.818	2.512	2.818
sub6	2014-04-21	47	1.5	0.48	126	2.809	1.995	3.162	2.512	3.981	2.818	3.162	2.512	3.548	1.995	2.818
sub6	2014-04-21	47	1.5	0.48	126	2.539	5.012	6.31	3.162	3.981	3.162	3.548	2.239	2.512	1.778	1.995
sub6	2014-04-21	47	1.5	0.48	126	2.18	2.512	3.162	1.995	2.239	1.585	2.512	2.239	2.512	1.995	2.239
sub6	2014-04-21	47	1.5	0.48	126	2.895	3.981	5.012	3.981	4.467	2.512	3.162	2.818	3.548	2.512	2.818
sub7	2014-12-03	47	1.5	0.48	36	3.968	10	3.162	3.548	3.162	3.981	3.548	5.012	3.981	4.467	2.818
sub7	2014-12-03	47	1.5	0.48	36	3.78	2.512	3.162	2.818	3.548	3.162	3.548	2.512	4.467	3.981	5.012
sub7	2014-12-03	47	1.5	0.48	36	3.451	2.512	3.548	3.162	3.548	2.818	3.548	3.162	4.467	3.162	3.548
sub7	2014-12-03	47	1.5	0.48	36	4.487	3.162	3.981	3.548	4.467	3.981	5.012	4.467	5.012	3.981	4.467
sub7	2014-12-03	47	1.5	0.48	36	3.017	1.995	2.512	2.239	3.548	2.818	3.162	2.512	3.548	2.512	3.548
sub7	2014-12-03	47	1.5	0.48	36	3.37	1.995	3.548	2.818	3.162	2.818	3.548	3.162	3.548	3.162	3.981
sub7	2014-12-03	47	1.5	0.48	126	5.493	7.943	6.31	7.079	6.31	7.079	4.467	5.012	4.467	6.31	5.623
sub7	2014-12-03	47	1.5	0.48	126	3.925	10	5.012	7.079	6.31	7.079	4.467	5.012	2.239	2.512	2.239
sub7	2014-12-03	47	1.5	0.48	126	2.914	7.943	3.162	3.548	3.162	3.548	2.818	3.548	2.239	2.818	2.512
sub7	2014-12-03	47	1.5	0.48	126	4.406	3.162	4.467	3.981	4.467	3.981	5.012	3.981	4.467	3.981	5.012
sub7	2014-12-03	47	1.5	0.48	126	1.798	1.585	1.995	1.585	1.778	1.585	1.778	1.413	1.995	1.778	2.239
sub7	2014-12-03	47	1.5	0.48	126	3.98	2.512	3.981	3.548	4.467	3.548	3.981	3.162	5.012	3.162	5.012
sub7	2014-12-04	47	1.5	0.48	36	2.976	5.012	6.31	5.623	6.31	3.981	4.467	1.778	2.818	1.995	2.818
sub7	2014-12-04	47	1.5	0.48	36	1.559	1.585	2.239	1.995	2.239	1.122	1.585	1.413	1.585	1.413	2.239
sub7	2014-12-04	47	1.5	0.48	36	2.35	1.259	1.995	1.585	2.512	2.239	2.512	1.778	2.512	2.239	2.818
sub7	2014-12-04	47	1.5	0.48	36	2.386	3.162	3.981	2.818	3.162	2.512	2.818	2.239	2.512	1.995	2.239
sub7	2014-12-04	47	1.5	0.48	36	2.345	3.981	5.012	3.162	3.548	2.512	2.818	2.512	2.818	1.413	1.995
sub7	2014-12-04	47	1.5	0.48	36	1.859	2.512	3.162	2.239	2.512	1.995	2.239	1.778	2.239	1.122	1.778
sub7	2014-12-04	47	1.5	0.48	36	2.176	5.012	6.31	3.981	4.467	2.239	2.512	1.778	2.239	1.778	2.512
sub7	2014-12-04	47	1.5	0.48	36	1.895	1.995	2.512	2.239	2.512	2.239	2.512	1.585	1.778	1.259	1.995
sub7	2014-12-04	47	1.5	0.48	36	1.451	2.512	3.162	1.585	1.778	1.585	1.778	1.259	1.413	1.259	1.413
sub7	2014-12-04	47	1.5	0.48	36	1.941	1.585	2.239	1.995	2.512	1.995	2.512	1.778	1.995	1.585	1.778
sub7	2014-12-05	47	1.5	0.48	36	2.85	3.162	3.981	3.162	3.548	3.162	3.548	2.239	2.818	2.512	2.818
sub7	2014-12-05	47	1.5	0.48	36	2.875	5.012	6.31	3.162	3.548	3.162	3.548	2.239	2.512	2.239	3.548
sub7	2014-12-05	47	1.5	0.48	36	2.895	3.162	4.467	3.548	3.981	3.162	3.548	2.512	2.818	2.512	2.818
sub7	2014-12-05	47	1.5	0.48	36	2.375	2.512	3.162	2.818	3.162	2.239	2.512	2.239	2.512	2.239	2.512
sub7	2014-12-05	47	1.5	0.48	36	3.062	3.981	5.012	3.548	3.981	2.512	3.548	2.512	2.818	2.512	4.467
sub7	2014-12-05	47	1.5	0.48	36	3.302	5.012	6.31	3.548	3.981	3.548	3.981	3.548	3.981	2.239	2.512
sub7	2014-12-05	47	1.5	0.48	36	1.336	1.995	2.512	1.413	1.585	1.259	1.413	1.259	1.413	1.259	1.413
sub7	2014-12-05	47	1.5	0.48	36	1.41	1.585	1.995	1.585	1.778	1.122	1.413	1.259	1.413	1.259	1.995
sub7	2014-12-05	47	1.5	0.48	36	2.05	5.012	6.31	2.818	3.548	2.239	2.512	1.778	1.995	1.778	1.995
sub7	2014-12-05	47	1.5	0.48	36	1.855	1.585	2.239	1.995	2.239	1.778	1.995	1.778	1.995	1.585	1.995
sub7	2014-12-06	47	1.5	0.48	36	1.936	2.512	3.162	2.239	2.512	1.778	2.239	1.995	2.239	1.585	1.778
sub7	2014-12-06	47	1.5	0.48	36	2.375	5.012	6.31	2.512	2.818	2.239	2.512	2.239	2.512	2.239	2.512
sub7	2014-12-06	47	1.5	0.48	36	0.852	2.512	3.162	1.995	2.239	0.891	1.122	0.708	0.794	0.708	0.891
sub7	2014-12-06	47	1.5	0.48	36	1.531	2.512	3.162	2.239	2.512	1.413	1.778	1.413	1.585	1.413	1.585
sub7	2014-12-06	47	1.5	0.48	36	0.916	1.585	1.995	0.794	0.891	0.794	0.891	0.794	1	0.891	1.122
sub7	2014-12-06	47	1.5	0.48	36	1.183	1.995	2.512	1.122	1.259	1.122	1.413	0.891	1.259	1	1.413
sub7	2014-12-06	47	1.5	0.48	36	1.339	1	1.413	1.259	1.413	1.259	1.585	1.259	1.778	0.891	1.259
sub7	2014-12-06	47	1.5	0.48	36	1.425	1.585	1.995	1.413	1.585	1.413	1.585	1.122	1.585	1.259	1.585
sub7	2014-12-06	47	1.5	0.48	36	1.379	1.585	1.995	1.413	1.778	1.413	1.778	1	1.413	1.259	1.413
sub7	2014-12-06	47	1.5	0.48	36	1.744	1.585	1.995	1.778	1.995	1.778	2.239	1.778	1.995	1.259	1.413
sub7	2014-12-08	47	1.5	0.48	36	2.058	3.162	3.981	3.548	4.467	2.239	2.512	1.995	2.239	1.585	1.778
sub7	2014-12-08	47	1.5	0.48	36	1.574	1.995	2.512	2.239	2.512	1.413	1.585	1.259	1.778	1.413	1.995
sub7	2014-12-08	47	1.5	0.48	36	1.218	1.259	1.585	1.122	1.259	0.891	1.259	1	1.259	1.122	1.778
sub7	2014-12-08	47	1.5	0.48	36	1.566	2.512	3.162	2.818	3.162	1.995	2.239	1	1.259	1.122	1.778
sub7	2014-12-08	47	1.5	0.48	36	1.519	1	1.778	1.122	1.413	1.259	1.413	1.259	1.413	1.259	2.512
sub7	2014-12-08	47	1.5	0.48	36	1.17	1	1.413	1.259	1.585	1.122	1.259	1.122	1.259	1	1.259
sub7	2014-12-08	47	1.5	0.48	36	1.362	1.585	2.239	1.122	1.413	1.122	1.259	1.122	1.413	1.259	1.995
sub7	2014-12-08	47	1.5	0.48	36	1.671	1.259	1.995	1.778	1.995	1.413	1.995	1.259	1.995	1.585	1.778
sub7	2014-12-08	47	1.5	0.48	36	1.971	3.162	3.981	3.548	3.981	1.585	1.778	1.413	2.818	1.995	2.239
sub7	2014-12-08	47	1.5	0.48	36	1.783	3.981	5.012	2.818	3.162	1.995	2.512	1.413	1.778	1.413	1.585
sub7	2014-12-09	47	1.5	0.48	36	1.604	1.995	2.512	1.778	1.995	1.585	1.778	1.122	1.778	1.585	1.778
sub7	2014-12-09	47	1.5	0.48	36	1.483	1.585	1.995	1.778	1.995	1.413	1.585	1.122	1.778	1.413	1.585
sub7	2014-12-09	47	1.5	0.48	36	1.628	3.162	3.981	2.239	2.512	1.778	1.995	1.413	1.585	1.413	1.585
sub7	2014-12-09	47	1.5	0.48	36	1.813	2.512	3.548	2.239	2.512	1.995	2.239	1.995	2.239	1	1.413
sub7	2014-12-09	47	1.5	0.48	36	1.425	2.512	3.162	1.259	1.413	1.259	1.585	1.259	1.413	1.259	1.778
sub7	2014-12-09	47	1.5	0.48	36	1.887	1.995	2.512	1.778	1.995	1.778	1.995	1.778	1.995	1.778	1.995
sub7	2014-12-09	47	1.5	0.48	36	2.09	2.512	3.162	2.512	2.818	2.239	2.512	1.778	2.239	1.778	1.995
sub7	2014-12-09	47	1.5	0.48	36	1.143	1	1.585	1.122	1.259	0.891	1.122	1	1.585	1	1.259
sub7	2014-12-09	47	1.5	0.48	36	1.558	2.512	3.162	2.239	2.512	1.778	1.995	1.413	1.778	1.122	1.259
sub7	2014-12-09	47	1.5	0.48	36	1.264	1.995	2.818	2.239	2.512	1.259	1.413	1.122	1.259	1.122	1.413
sub7	2014-12-13	47	1.5	0.48	36	1.471	3.162	3.981	2.239	2.512	1.778	1.995	1.259	1.413	1.122	1.259
sub7	2014-12-13	47	1.5	0.48	36	1.219	3.981	5.012	1.259	1.585	1.259	1.413	1.122	1.259	1	1.259
sub7	2014-12-13	47	1.5	0.48	36	2.118	2.512	3.162	2.818	3.162	2.818	3.162	1.585	1.778	1.585	1.778
sub7	2014-12-13	47	1.5	0.48	36	1.127	1.585	2.239	1.259	1.585	1	1.122	1	1.259	1.122	1.259
sub7	2014-12-13	47	1.5	0.48	36	1.175	1.585	1.995	1.122	1.413	1.259	1.413	1	1.122	1	1.259
sub7	2014-12-13	47	1.5	0.48	126	1.689	5.012	6.31	2.239	2.512	1.778	1.995	1.585	1.778	1.413	1.585
sub7	2014-12-13	47	1.5	0.48	126	1.562	1.259	1.585	1.259	1.585	1	1.413	1.259	1.778	1.413	2.512
sub7	2014-12-13	47	1.5	0.48	126	1.448	1	1.585	1.259	1.413	1.259	1.585	1.413	1.585	1.259	1.585
sub7	2014-12-13	47	1.5	0.48	126	2.09	1.995	2.818	2.512	3.162	2.239	2.512	1.778	2.239	1.778	1.995
sub7	2014-12-13	47	1.5	0.48	126	1.612	2.512	3.162	2.239	2.512	1.778	1.995	1.778	1.995	1	1.122
sub8	2014-12-03	47	1.5	0.48	36	2.871	5.012	6.31	3.162	3.548	3.162	3.981	2.512	2.818	2.239	2.512
sub8	2014-12-03	47	1.5	0.48	36	2.094	1.995	2.512	1.585	1.778	1.585	2.239	1.995	2.239	1.995	2.512
sub8	2014-12-03	47	1.5	0.48	36	3.176	2.512	3.162	2.818	3.548	3.162	3.548	2.818	3.162	2.818	3.548
sub8	2014-12-03	47	1.5	0.48	36	2.004	1.995	2.512	2.239	2.512	1.995	2.239	1.778	2.239	1.778	1.995
sub8	2014-12-03	47	1.5	0.48	36	3.225	7.943	2.512	2.818	2.512	3.981	3.548	3.981	2.512	2.818	2.512
sub8	2014-12-03	47	1.5	0.48	36	2.335	1.995	2.512	1.778	2.239	1.995	2.512	2.239	2.512	2.239	2.512
sub8	2014-12-03	47	1.5	0.48	126	6.508	3.981	5.623	5.012	5.623	5.012	7.943	6.31	7.079	5.623	7.079
sub8	2014-12-03	47	1.5	0.48	126	4.406	5.012	7.079	6.31	7.079	3.981	5.012	3.981	5.012	3.981	4.467
sub8	2014-12-03	47	1.5	0.48	126	3.427	3.162	3.981	3.162	3.548	3.162	3.548	3.162	3.548	3.162	3.981
sub8	2014-12-03	47	1.5	0.48	126	4.154	3.981	5.623	5.012	6.31	3.981	5.012	3.162	3.981	3.162	5.623
sub8	2014-12-03	47	1.5	0.48	126	3.831	7.943	2.512	2.818	2.239	3.162	2.818	5.012	3.981	4.467	3.548
sub8	2014-12-03	47	1.5	0.48	126	1.927	1.995	2.512	1.778	1.995	1.778	1.995	1.778	1.995	1.778	2.239
sub8	2014-12-04	47	1.5	0.48	126	1.641	1.259	3.548	1	1.259	1.122	1.995	1.585	1.778	1.585	1.778
sub8	2014-12-04	47	1.5	0.48	126	1.543	1	1.413	1.259	2.239	1.778	1.995	1.585	1.778	1	1.122
sub8	2014-12-04	47	1.5	0.48	126	0.946	1.995	2.818	1.122	1.413	0.891	1	0.891	1	0.891	1
sub8	2014-12-04	47	1.5	0.48	126	4.048	3.981	5.012	4.467	5.012	4.467	5.012	4.467	5.012	2.512	2.818
sub8	2014-12-04	47	1.5	0.48	126	1.431	1.259	1.585	1.259	1.413	1.122	1.778	1.259	1.585	1.259	1.585
sub8	2014-12-04	47	1.5	0.48	126	2.727	3.162	3.981	2.512	2.818	2.239	3.981	1.995	2.818	2.512	2.818
sub8	2014-12-04	47	1.5	0.48	126	1.114	3.162	3.981	2.818	3.981	1.259	1.413	1.259	1.413	0.631	0.708
sub8	2014-12-04	47	1.5	0.48	126	1.818	1.995	2.512	1.778	1.995	1.778	1.995	1.778	1.995	1.585	1.778
sub8	2014-12-04	47	1.5	0.48	126	2.18	2.512	3.162	2.512	2.818	2.512	2.818	2.239	2.512	1.413	1.585
sub8	2014-12-04	47	1.5	0.48	126	2.004	2.512	3.162	1.778	2.239	1.995	2.239	1.778	1.995	1.778	2.239
sub8	2014-12-05	47	1.5	0.48	126	1.589	3.162	3.981	1.585	1.995	1.778	2.239	1.259	1.585	1.259	1.413
sub8	2014-12-05	47	1.5	0.48	126	0.85	0.794	1	0.631	0.794	0.501	0.562	0.355	0.708	0.631	0.794
sub8	2014-12-05	47	1.5	0.48	126	2.045	1.585	1.995	1.778	1.995	1.778	2.239	1.778	2.239	1.995	2.239
sub8	2014-12-05	47	1.5	0.48	126	2.687	3.162	3.981	2.512	3.548	2.818	3.548	2.818	3.162	1.778	1.995
sub8	2014-12-05	47	1.5	0.48	126	1.628	1.995	2.512	2.239	2.512	1.413	1.585	1.413	1.995	1.585	1.778
sub8	2014-12-05	47	1.5	0.48	126	1.827	5.012	6.31	1.778	1.995	1.778	1.995	1.585	1.778	1.585	2.239
sub8	2014-12-05	47	1.5	0.48	126	2.753	3.981	5.012	3.162	3.981	3.162	3.548	2.239	2.512	2.239	2.818
sub8	2014-12-05	47	1.5	0.48	126	1.757	1.585	1.995	1.778	1.995	1.585	1.995	1.778	1.995	1.413	1.778
sub8	2014-12-05	47	1.5	0.48	126	2.591	1.995	2.512	2.239	3.162	2.818	3.162	2.512	2.818	1.995	2.239
sub8	2014-12-05	47	1.5	0.48	126	3.632	5.012	6.31	3.548	4.467	3.548	4.467	3.981	4.467	2.512	2.818
sub8	2014-12-06	47	1.5	0.48	126	1.7	1.585	1.995	1.413	1.778	1.259	1.995	1.585	1.995	1.585	1.778
sub8	2014-12-06	47	1.5	0.48	126	0.85	0.501	0.631	0.355	0.447	0.398	0.447	0.316	0.355	0.316	0.631
sub8	2014-12-06	47	1.5	0.48	126	1.522	1	1.259	1.122	1.259	1	1.259	1	1.778	1.585	2.512
sub8	2014-12-06	47	1.5	0.48	126	2.78	2.512	3.162	2.239	2.818	2.512	3.162	2.512	2.818	2.512	3.162
sub8	2014-12-06	47	1.5	0.48	126	3.004	3.162	3.981	2.512	2.818	2.512	3.162	2.818	3.162	2.818	3.548
sub8	2014-12-06	47	1.5	0.48	126	0.993	1	1.413	0.891	1	0.891	1.122	0.891	1	0.794	1.259
sub8	2014-12-06	47	1.5	0.48	126	1.428	1.259	1.778	1.585	1.778	1.585	1.778	1.122	1.413	1.259	1.413
sub8	2014-12-06	47	1.5	0.48	126	1.811	1.995	2.818	1.995	2.512	1.778	1.995	1.585	2.512	1.413	1.585
sub8	2014-12-06	47	1.5	0.48	126	1.602	1.585	1.995	1.413	1.995	1.778	1.995	1.413	1.585	1.259	1.585
sub8	2014-12-06	47	1.5	0.48	126	1.061	1	1.413	1	1.122	1	1.122	1	1.122	1	1.122
sub8	2014-12-07	47	1.5	0.48	126	1.837	7.943	2.818	3.548	2.239	2.818	1.585	1.995	1.585	1.778	1.259
sub8	2014-12-07	47	1.5	0.48	126	1.133	1.585	2.239	1	1.122	0.708	1.585	1.122	1.259	1	1.122
sub8	2014-12-07	47	1.5	0.48	126	2.355	3.162	4.467	3.548	3.981	2.512	2.818	1.995	2.512	1.778	2.512
sub8	2014-12-07	47	1.5	0.48	126	1.514	2.512	3.548	1.413	1.995	1.585	1.778	1.413	2.512	0.794	1
sub8	2014-12-07	47	1.5	0.48	126	1.834	1.995	2.512	2.239	2.512	1.995	2.239	1.778	1.995	1.413	1.585
sub8	2014-12-07	47	1.5	0.48	126	0.85	0.398	0.631	0.501	1	0.794	0.891	0.501	0.562	0.316	0.355
sub8	2014-12-07	47	1.5	0.48	126	1.436	2.512	3.162	1.995	2.239	1.413	1.995	1.259	1.413	1.122	1.413
sub8	2014-12-07	47	1.5	0.48	126	1.711	1.995	2.818	1.995	2.239	1.995	2.239	1.413	1.585	1.259	1.778
sub8	2014-12-07	47	1.5	0.48	126	1.335	1.585	1.995	1.259	1.413	0.891	1.585	1.413	1.585	1.122	1.413
sub8	2014-12-07	47	1.5	0.48	126	1.902	1.585	1.995	1.122	1.413	1.259	1.995	1.413	2.512	1.995	2.239
sub8	2014-12-08	47	1.5	0.48	126	1.043	1	1.259	1	1.122	1	1.122	1	1.122	0.891	1.122
sub8	2014-12-08	47	1.5	0.48	126	2.126	1.995	2.512	1.778	2.239	1.778	2.512	1.995	2.239	1.995	2.239
sub8	2014-12-08	47	1.5	0.48	126	1.703	2.512	3.162	1.413	1.778	1.259	1.413	1.259	1.995	1.778	2.512
sub8	2014-12-08	47	1.5	0.48	126	0.85	1.995	2.818	1.413	1.585	0.891	1	0.794	0.891	0.708	0.794
sub8	2014-12-08	47	1.5	0.48	126	0.85	1	1.259	0.631	0.891	0.501	0.562	0.501	0.631	0.447	0.501
sub8	2014-12-08	47	1.5	0.48	126	1.971	2.512	3.162	2.239	2.512	2.239	2.512	1.995	2.239	1.259	1.585
sub8	2014-12-08	47	1.5	0.48	126	0.942	3.981	5.012	3.548	3.981	1	1.259	0.891	1	0.708	0.794
sub8	2014-12-08	47	1.5	0.48	126	1.425	1.995	2.512	1.585	1.995	1.259	1.585	1.259	1.413	1.259	1.778
sub8	2014-12-08	47	1.5	0.48	126	0.954	1	1.259	1.122	1.259	1	1.122	0.708	1	0.891	1
sub8	2014-12-08	47	1.5	0.48	126	1.73	2.512	3.162	2.818	3.162	1.585	1.778	1.413	1.778	1.585	2.239
sub8	2014-12-09	47	1.5	0.48	36	1.689	1.995	2.818	1.585	2.239	1.585	1.778	1.413	1.778	1.585	1.995
sub8	2014-12-09	47	1.5	0.48	36	1.743	1.259	1.585	1.413	1.778	1.585	2.512	1.585	1.778	1.413	1.585
sub8	2014-12-09	47	1.5	0.48	36	2.753	3.162	3.981	2.239	3.548	3.162	3.548	2.239	2.818	2.239	2.512
sub8	2014-12-09	47	1.5	0.48	36	2.385	1.585	1.995	1.778	3.548	3.162	3.548	1.995	2.239	1.585	1.778
sub8	2014-12-09	47	1.5	0.48	36	1.609	2.512	3.548	1.995	2.239	1.778	1.995	1.259	1.585	1.259	1.778
sub8	2014-12-09	47	1.5	0.48	36	1.518	1.585	1.995	1.585	1.995	1.585	1.778	1.259	1.585	1.122	1.778
sub8	2014-12-09	47	1.5	0.48	126	1.498	3.162	3.981	3.162	3.548	1.585	1.778	1.585	1.778	1	1.259
sub8	2014-12-09	47	1.5	0.48	126	2.045	2.512	3.548	2.512	3.162	1.995	2.239	1.778	2.239	1.778	2.239
sub8	2014-12-09	47	1.5	0.48	126	1.669	1.995	2.818	2.512	3.162	1.585	1.778	1.413	1.585	1.413	2.239
sub8	2014-12-09	47	1.5	0.48	126	1.291	1.259	1.995	1.585	1.778	1.585	1.778	1	1.122	1	1.259
sub8	2014-12-09	47	1.5	0.48	126	0.85	0.398	0.501	0.447	0.501	0.398	0.447	0.355	0.398	0.316	0.398
sub8	2014-12-09	47	1.5	0.48	126	1.157	1.585	1.995	1.259	1.585	0.891	1.259	1.122	1.413	1	1.259
sub9	2016-05-04	47	1.5	0.48	36	7.813	14.125	11.22	15.849	14.125	15.849	5.623	7.079	5.623	7.079	5.623
sub9	2016-05-04	47	1.5	0.48	36	5.928	4.467	5.623	4.467	5.012	4.467	5.623	5.012	7.079	6.31	7.079
sub9	2016-05-04	47	1.5	0.48	36	4.243	4.467	5.623	4.467	5.623	3.981	4.467	3.981	5.012	3.548	4.467
sub9	2016-05-04	47	1.5	0.48	36	7.545	2.818	7.079	4.467	8.913	7.943	8.913	7.079	7.943	6.31	7.079
sub9	2016-05-04	47	1.5	0.48	36	5.775	7.079	5.623	7.943	5.623	8.913	5.012	5.623	5.012	5.623	4.467
sub9	2016-05-04	47	1.5	0.48	36	6.016	4.467	8.913	7.079	7.943	6.31	7.079	5.623	6.31	4.467	6.31
sub9	2016-05-04	47	1.5	0.48	126	5.621	5.623	7.079	5.623	6.31	5.623	7.079	4.467	5.012	4.467	7.079
sub9	2016-05-04	47	1.5	0.48	126	4.851	4.467	5.623	4.467	5.623	5.012	5.623	3.981	5.012	4.467	5.012
sub9	2016-05-04	47	1.5	0.48	126	8.222	7.079	3.548	5.623	5.012	10	7.943	8.913	7.943	8.913	5.623
sub9	2016-05-04	47	1.5	0.48	126	7.543	5.623	14.125	10	11.22	5.012	7.079	6.31	8.913	7.943	10
sub9	2016-05-04	47	1.5	0.48	126	5.8	5.623	7.079	4.467	5.012	4.467	6.31	5.623	6.31	5.012	7.079
sub9	2016-05-04	47	1.5	0.48	126	6.21	8.913	7.079	8.913	7.943	8.913	5.012	5.623	5.012	7.079	5.623
sub9	2016-05-05	47	1.5	0.48	126	5.783	5.012	6.31	3.548	3.981	3.162	7.943	5.012	7.943	5.012	5.623
sub9	2016-05-05	47	1.5	0.48	126	5.534	7.943	3.981	5.623	5.012	5.623	5.012	5.623	5.012	6.31	5.623
sub9	2016-05-05	47	1.5	0.48	126	5.88	7.943	6.31	7.943	7.079	7.943	6.31	7.079	4.467	5.012	4.467
sub9	2016-05-05	47	1.5	0.48	126	5.476	3.981	5.012	2.818	4.467	3.981	6.31	5.623	6.31	5.012	5.623
sub9	2016-05-05	47	1.5	0.48	126	11.573	7.943	5.012	6.31	5.623	14.125	10	12.589	11.22	12.589	8.913
sub9	2016-05-05	47	1.5	0.48	126	4.162	3.981	5.012	2.239	3.548	3.162	3.548	3.162	5.012	4.467	5.623
sub9	2016-05-05	47	1.5	0.48	126	3.7	3.162	3.981	3.162	3.548	3.162	3.981	3.548	3.981	3.548	3.981
sub9	2016-05-05	47	1.5	0.48	126	3.571	5.012	6.31	5.012	5.623	3.548	3.981	3.548	3.981	2.818	3.548
sub9	2016-05-05	47	1.5	0.48	126	6.643	7.943	6.31	7.943	5.623	8.913	5.623	6.31	5.623	7.079	6.31
sub9	2016-05-05	47	1.5	0.48	126	4.055	3.162	3.981	3.162	3.548	3.162	3.981	3.548	4.467	3.548	5.623
sub9	2016-05-06	47	1.5	0.48	126	4.406	2.818	5.623	3.981	4.467	3.981	5.012	3.981	4.467	3.981	5.012
sub9	2016-05-06	47	1.5	0.48	126	3.638	3.548	4.467	3.548	5.012	4.467	5.012	2.818	3.548	2.818	3.162
sub9	2016-05-06	47	1.5	0.48	126	3.808	4.467	5.623	3.981	4.467	3.162	3.981	3.162	3.981	3.548	5.012
sub9	2016-05-06	47	1.5	0.48	126	4.568	4.467	8.913	5.012	5.623	4.467	5.012	4.467	5.012	3.981	4.467
sub9	2016-05-06	47	1.5	0.48	126	5.684	2.239	4.467	3.548	5.623	4.467	5.623	4.467	5.623	5.012	8.913
sub9	2016-05-06	47	1.5	0.48	126	4.152	2.818	5.623	3.981	4.467	3.548	4.467	3.981	4.467	3.981	4.467
sub9	2016-05-06	47	1.5	0.48	126	5.239	4.467	7.079	5.012	5.623	5.012	5.623	5.012	6.31	4.467	5.012
sub9	2016-05-06	47	1.5	0.48	126	4.805	3.548	5.623	4.467	5.012	4.467	5.623	3.981	4.467	3.981	6.31
sub9	2016-05-06	47	1.5	0.48	126	5.921	3.548	8.913	6.31	7.943	5.012	5.623	5.012	6.31	5.623	7.943
sub9	2016-05-06	47	1.5	0.48	126	4.09	7.079	2.818	3.548	2.818	4.467	3.548	3.981	3.548	5.012	3.981
sub9	2016-05-07	47	1.5	0.48	126	6.874	8.913	7.079	8.913	7.079	10	6.31	7.079	4.467	7.079	6.31
sub9	2016-05-07	47	1.5	0.48	126	3.936	7.079	2.818	3.548	3.162	3.981	3.548	5.012	3.548	3.981	3.548
sub9	2016-05-07	47	1.5	0.48	126	4.017	2.818	3.548	2.512	2.818	2.512	2.818	2.512	5.623	5.012	5.623
sub9	2016-05-07	47	1.5	0.48	126	6.364	7.079	5.623	7.079	6.31	7.079	5.012	7.079	6.31	7.079	5.623
sub9	2016-05-07	47	1.5	0.48	126	7.745	14.125	8.913	11.22	8.913	10	8.913	10	5.623	6.31	5.623
sub9	2016-05-07	47	1.5	0.48	126	3.466	4.467	5.623	4.467	5.012	3.548	3.981	2.818	3.162	2.818	4.467
sub9	2016-05-07	47	1.5	0.48	126	3.434	3.548	5.623	3.548	3.981	3.548	3.981	3.162	3.548	2.818	3.548
sub9	2016-05-07	47	1.5	0.48	126	6.393	7.079	5.623	7.079	5.012	5.623	5.012	7.079	5.623	7.943	7.079
sub9	2016-05-07	47	1.5	0.48	126	5.821	8.913	5.623	7.079	6.31	7.079	5.623	6.31	5.623	6.31	3.981
sub9	2016-05-07	47	1.5	0.48	126	5.34	5.623	7.079	4.467	5.012	3.548	6.31	4.467	5.623	5.012	7.079
sub9	2016-05-08	47	1.5	0.48	126	3.69	4.467	5.623	4.467	5.012	3.981	4.467	3.548	4.467	2.512	3.162
sub9	2016-05-08	47	1.5	0.48	126	4.108	3.548	5.623	3.548	3.981	3.548	5.012	3.548	3.981	3.548	5.012
sub9	2016-05-08	47	1.5	0.48	126	2.535	2.239	2.818	2.239	2.818	2.239	2.512	2.239	2.818	2.239	3.162
sub9	2016-05-08	47	1.5	0.48	126	3.927	7.079	3.548	4.467	3.981	4.467	3.548	4.467	3.548	3.981	3.548
sub9	2016-05-08	47	1.5	0.48	126	2.143	7.079	2.818	3.981	2.818	3.162	1.995	2.512	1.778	1.995	1.413
sub9	2016-05-08	47	1.5	0.48	126	1.376	1.413	1.778	1.413	1.585	1	1.413	1.259	1.585	1.413	1.585
sub9	2016-05-08	47	1.5	0.48	126	3.37	4.467	5.623	4.467	5.012	2.818	3.548	3.162	3.548	3.162	3.981
sub9	2016-05-08	47	1.5	0.48	126	3.466	4.467	5.623	3.981	4.467	3.981	4.467	2.818	3.162	2.818	3.548
sub9	2016-05-08	47	1.5	0.48	126	3.216	7.079	5.623	7.079	3.162	3.548	2.818	3.548	3.162	3.981	2.239
sub9	2016-05-09	47	1.5	0.48	126	2.734	3.548	4.467	2.818	3.162	2.818	3.162	2.512	3.162	2.239	2.512
sub9	2016-05-09	47	1.5	0.48	126	3.216	3.548	4.467	3.548	4.467	3.548	3.981	3.162	3.548	2.239	2.818
sub9	2016-05-09	47	1.5	0.48	126	4.396	3.548	5.623	4.467	5.012	4.467	5.012	3.981	4.467	3.981	4.467
sub9	2016-05-09	47	1.5	0.48	126	3.619	4.467	5.623	3.548	4.467	3.981	4.467	2.818	4.467	2.818	3.162
sub9	2016-05-09	47	1.5	0.48	126	3.029	3.548	4.467	3.548	4.467	3.162	3.548	3.162	3.548	2.239	2.512
sub9	2016-05-09	47	1.5	0.48	126	2.701	7.079	4.467	5.623	3.548	4.467	2.239	2.512	2.239	2.512	2.239
sub9	2016-05-09	47	1.5	0.48	126	2.734	2.818	4.467	3.162	3.981	2.512	2.818	2.239	3.162	2.512	3.162
sub9	2016-05-09	47	1.5	0.48	126	2.35	1.778	2.239	1.778	2.818	2.239	2.512	1.778	2.818	2.239	2.512
sub9	2016-05-09	47	1.5	0.48	126	3.278	3.548	4.467	3.548	3.981	3.162	3.548	2.512	4.467	2.818	3.162
sub9	2016-05-09	47	1.5	0.48	126	2.335	3.548	5.623	2.239	2.512	1.995	2.512	2.239	2.512	2.239	2.512
sub9	2016-05-09	47	1.5	0.48	126	2.99	2.818	5.623	4.467	5.012	2.818	3.162	2.818	3.162	2.818	3.162
sub9	2016-05-10	47	1.5	0.48	36	5.284	3.162	6.31	5.012	6.31	5.012	6.31	5.623	6.31	3.981	4.467
sub9	2016-05-10	47	1.5	0.48	36	3.247	5.012	6.31	3.548	4.467	3.162	3.548	3.162	3.548	2.512	3.548
sub9	2016-05-10	47	1.5	0.48	36	3.146	3.981	6.31	3.162	3.548	3.162	3.548	2.512	3.981	2.512	3.162
sub9	2016-05-10	47	1.5	0.48	36	4.087	5.012	6.31	4.467	5.623	3.981	4.467	3.981	4.467	3.162	4.467
sub9	2016-05-10	47	1.5	0.48	36	2.535	3.162	3.981	2.818	3.548	2.239	2.512	2.239	2.818	2.239	3.162
sub9	2016-05-10	47	1.5	0.48	36	3.999	6.31	7.943	5.012	6.31	3.548	3.981	3.548	4.467	3.981	4.467
sub9	2016-05-10	47	1.5	0.48	126	3.496	10	3.981	5.012	3.548	4.467	3.548	4.467	2.818	3.162	2.512
sub9	2016-05-10	47	1.5	0.48	126	2.335	2.512	7.943	1.778	2.512	2.239	2.512	1.995	2.512	2.239	2.512
sub9	2016-05-10	47	1.5	0.48	126	2.783	3.981	5.012	3.981	5.012	3.981	4.467	1.995	2.239	1.778	2.239
sub9	2016-05-10	47	1.5	0.48	126	3.242	3.981	5.012	3.981	4.467	3.981	4.467	2.512	2.818	2.512	3.162
sub9	2016-05-10	47	1.5	0.48	126	2.741	3.162	3.981	3.162	3.548	2.512	2.818	2.512	2.818	2.239	3.548
sub9	2016-05-10	47	1.5	0.48	126	3.288	3.981	5.012	2.239	2.512	2.239	3.162	2.818	3.981	3.548	3.981
sub10	2016-05-04	47	1.5	0.48	36	7.077	5.623	8.913	6.31	7.079	5.623	6.31	5.623	8.913	7.079	8.913
sub10	2016-05-04	47	1.5	0.48	36	4.85	7.079	2.239	3.548	3.162	3.981	3.162	5.623	5.012	6.31	5.012
sub10	2016-05-04	47	1.5	0.48	36	5.148	4.467	5.623	4.467	5.012	4.467	5.012	4.467	5.623	5.012	6.31
sub10	2016-05-04	47	1.5	0.48	36	3.888	5.623	7.079	5.623	6.31	5.012	5.623	3.162	3.548	2.818	3.162
sub10	2016-05-04	47	1.5	0.48	36	4.875	3.548	5.623	3.981	5.623	5.012	6.31	4.467	5.012	3.981	4.467
sub10	2016-05-04	47	1.5	0.48	36	7.03	2.239	7.079	5.623	7.079	6.31	7.943	6.31	7.079	5.623	8.913
sub10	2016-05-04	47	1.5	0.48	126	8.337	8.913	5.623	8.913	7.943	10	7.943	8.913	7.943	8.913	6.31
sub10	2016-05-04	47	1.5	0.48	126	6.675	7.079	4.467	6.31	5.623	7.943	4.467	7.079	6.31	7.943	6.31
sub10	2016-05-04	47	1.5	0.48	126	5.483	4.467	5.623	3.981	5.012	3.981	4.467	3.981	7.079	6.31	7.079
sub10	2016-05-04	47	1.5	0.48	126	6.481	8.913	4.467	5.623	5.012	6.31	5.623	6.31	5.623	7.943	7.079
sub10	2016-05-04	47	1.5	0.48	126	9.295	7.079	5.623	7.943	7.079	10	8.913	10	8.913	10	7.943
sub10	2016-05-04	47	1.5	0.48	126	3.507	3.548	4.467	3.548	3.981	3.548	3.981	3.548	3.981	2.818	3.162
sub10	2016-05-05	47	1.5	0.48	36	3.579	10	3.162	4.467	3.548	3.981	3.548	3.981	2.818	3.981	3.162
sub10	2016-05-05	47	1.5	0.48	36	5.675	5.012	6.31	4.467	5.623	5.012	6.31	5.012	7.079	5.012	5.623
sub10	2016-05-05	47	1.5	0.48	36	6.754	15.849	6.31	7.943	6.31	7.079	6.31	7.943	5.623	7.943	5.623
sub10	2016-05-05	47	1.5	0.48	36	5.736	3.981	5.012	3.981	5.012	4.467	6.31	4.467	7.079	5.012	7.079
sub10	2016-05-05	47	1.5	0.48	36	5.094	5.012	7.943	6.31	7.079	5.012	7.079	3.981	5.012	4.467	5.012
sub10	2016-05-05	47	1.5	0.48	36	5.605	5.012	6.31	5.012	6.31	5.623	6.31	5.012	7.079	3.981	5.623
sub10	2016-05-05	47	1.5	0.48	36	4.931	5.012	6.31	5.012	5.623	5.012	6.31	5.012	5.623	3.162	4.467
sub10	2016-05-05	47	1.5	0.48	36	5.034	5.012	6.31	5.012	6.31	5.012	5.623	4.467	5.623	4.467	5.012
sub10	2016-05-05	47	1.5	0.48	36	5.556	7.943	5.012	6.31	5.623	6.31	5.623	6.31	5.623	6.31	3.162
sub10	2016-05-05	47	1.5	0.48	36	4.485	7.943	5.012	7.079	5.623	6.31	3.162	4.467	3.981	5.012	3.981
sub10	2016-05-06	47	1.5	0.48	36	5.341	7.943	3.981	5.623	5.012	5.623	5.012	5.623	5.012	6.31	4.467
sub10	2016-05-06	47	1.5	0.48	36	6.043	5.012	7.943	5.623	6.31	4.467	6.31	5.012	7.079	6.31	7.079
sub10	2016-05-06	47	1.5	0.48	36	5.329	5.012	6.31	3.981	4.467	3.981	8.913	5.012	5.623	3.981	4.467
sub10	2016-05-06	47	1.5	0.48	36	5.136	3.981	6.31	4.467	5.012	4.467	5.623	5.012	5.623	4.467	5.623
sub10	2016-05-06	47	1.5	0.48	36	4.658	3.981	5.012	3.981	5.012	4.467	5.012	3.981	5.012	4.467	5.012
sub10	2016-05-06	47	1.5	0.48	36	3.758	3.981	5.012	3.981	4.467	2.818	3.548	3.162	3.548	3.162	6.31
sub10	2016-05-06	47	1.5	0.48	36	4.323	5.012	10	5.012	5.623	4.467	5.012	4.467	5.623	2.818	3.548
sub10	2016-05-06	47	1.5	0.48	36	6.196	6.31	7.943	5.012	5.623	5.012	6.31	5.012	6.31	5.623	8.913
sub10	2016-05-06	47	1.5	0.48	36	7.077	10	7.943	10	7.943	8.913	7.079	8.913	5.623	6.31	5.623
sub10	2016-05-06	47	1.5	0.48	36	4.363	3.981	5.012	3.548	3.981	3.548	3.981	3.548	5.012	4.467	5.623
sub10	2016-05-07	47	1.5	0.48	36	7.03	3.981	12.589	10	11.22	7.943	8.913	6.31	7.079	5.623	6.31
sub10	2016-05-07	47	1.5	0.48	36	4.954	3.162	3.981	3.162	5.012	3.162	6.31	4.467	5.012	4.467	6.31
sub10	2016-05-07	47	1.5	0.48	36	5.31	5.012	10	7.943	8.913	6.31	7.079	3.981	5.012	4.467	5.012
sub10	2016-05-07	47	1.5	0.48	36	3.176	3.981	5.012	3.162	3.548	3.162	3.548	2.818	3.162	2.818	3.548
sub10	2016-05-07	47	1.5	0.48	36	6.315	6.31	10	7.943	8.913	7.079	7.943	4.467	6.31	5.012	7.079
sub10	2016-05-07	47	1.5	0.48	36	4.169	5.012	6.31	4.467	5.012	3.548	3.981	3.162	4.467	3.548	6.31
sub10	2016-05-07	47	1.5	0.48	36	4.152	2.512	5.012	3.981	4.467	3.548	4.467	3.981	4.467	3.981	4.467
sub10	2016-05-07	47	1.5	0.48	36	3.717	5.012	6.31	3.548	4.467	3.981	4.467	3.162	3.548	3.162	3.981
sub10	2016-05-07	47	1.5	0.48	36	5.443	5.012	6.31	5.012	6.31	5.623	6.31	4.467	5.623	5.012	5.623
sub10	2016-05-07	47	1.5	0.48	36	2.58	3.162	5.012	3.981	5.012	2.239	2.512	2.239	3.162	2.512	2.818
sub10	2016-05-08	47	1.5	0.48	36	4.243	6.31	7.943	4.467	5.623	4.467	5.012	3.981	4.467	3.548	3.981
sub10	2016-05-08	47	1.5	0.48	36	5.25	6.31	7.943	5.623	7.079	5.623	6.31	4.467	5.012	4.467	5.623
sub10	2016-05-08	47	1.5	0.48	36	4.872	6.31	7.943	4.467	5.012	3.981	5.623	5.012	5.623	3.981	5.012
sub10	2016-05-08	47	1.5	0.48	36	5.079	3.162	6.31	3.981	5.012	4.467	5.623	3.981	5.623	4.467	6.31
sub10	2016-05-08	47	1.5	0.48	36	5.277	3.981	7.943	4.467	5.623	4.467	5.012	4.467	5.623	5.012	7.079
sub10	2016-05-08	47	1.5	0.48	36	3.888	3.162	7.943	6.31	7.079	5.012	5.623	3.162	3.548	2.818	3.162
sub10	2016-05-08	47	1.5	0.48	36	2.952	3.162	3.981	3.162	3.981	3.162	3.548	2.512	2.818	2.512	3.162
sub10	2016-05-08	47	1.5	0.48	36	5.169	5.012	6.31	5.012	5.623	4.467	6.31	5.012	5.623	3.981	5.623
sub10	2016-05-08	47	1.5	0.48	36	5.148	5.012	7.943	3.981	5.623	4.467	5.012	4.467	6.31	5.012	5.623
sub10	2016-05-08	47	1.5	0.48	36	2.638	1.585	2.512	1.995	2.818	2.512	3.162	2.239	2.512	2.239	3.162
sub10	2016-05-09	47	1.5	0.48	36	6.315	3.981	6.31	5.012	8.913	7.079	7.943	6.31	7.079	4.467	5.012
sub10	2016-05-09	47	1.5	0.48	36	5.318	10	5.012	6.31	5.012	5.623	5.012	5.623	5.012	5.623	5.012
sub10	2016-05-09	47	1.5	0.48	36	4.224	3.162	3.981	2.818	4.467	3.981	4.467	3.981	4.467	3.981	4.467
sub10	2016-05-09	47	1.5	0.48	36	3.176	1.585	1.995	1.585	3.548	3.162	3.548	2.818	3.162	2.818	3.548
sub10	2016-05-09	47	1.5	0.48	36	4.396	3.981	5.012	3.981	6.31	4.467	5.012	3.981	4.467	3.981	4.467
sub10	2016-05-09	47	1.5	0.48	36	4.406	3.981	5.012	3.981	4.467	3.981	5.012	3.981	4.467	3.981	5.012
sub10	2016-05-09	47	1.5	0.48	36	5.54	6.31	7.943	6.31	7.079	5.623	7.079	5.012	7.079	3.981	4.467
sub10	2016-05-09	47	1.5	0.48	36	4.516	12.589	3.981	5.012	3.981	4.467	3.981	5.623	4.467	5.012	3.548
sub10	2016-05-09	47	1.5	0.48	36	4.516	5.012	6.31	3.548	3.981	3.548	4.467	3.981	5.623	4.467	5.012
sub10	2016-05-09	47	1.5	0.48	36	3.846	3.981	6.31	3.981	5.012	3.548	3.981	3.548	4.467	3.548	3.981
sub10	2016-05-10	47	1.5	0.48	36	3.805	3.162	6.31	4.467	5.012	3.548	4.467	3.981	4.467	2.818	3.548
sub10	2016-05-10	47	1.5	0.48	36	4.953	5.012	6.31	3.981	5.012	4.467	5.012	3.981	5.623	5.012	5.623
sub10	2016-05-10	47	1.5	0.48	36	4.125	6.31	10	7.943	8.913	4.467	5.623	3.981	5.623	2.239	2.818
sub10	2016-05-10	47	1.5	0.48	36	5.284	10	5.012	6.31	5.623	6.31	5.623	6.31	4.467	5.012	3.981
sub10	2016-05-10	47	1.5	0.48	36	2.99	5.012	7.943	2.818	3.162	2.818	3.162	2.818	3.162	2.818	3.162
sub10	2016-05-10	47	1.5	0.48	36	3.7	3.981	5.012	3.162	3.981	3.548	3.981	3.162	3.981	3.548	3.981
sub10	2016-05-10	47	1.5	0.48	126	7.158	3.548	4.467	3.162	7.943	6.31	7.079	5.623	8.913	7.079	7.943
sub10	2016-05-10	47	1.5	0.48	126	5.774	10	3.981	5.012	3.162	6.31	5.623	6.31	5.623	6.31	4.467
sub10	2016-05-10	47	1.5	0.48	126	5.993	5.012	6.31	4.467	5.623	5.012	6.31	5.623	6.31	5.623	7.079
sub10	2016-05-10	47	1.5	0.48	126	2.375	1.995	2.512	1.995	2.512	2.239	2.512	2.239	2.512	2.239	2.512
sub10	2016-05-10	47	1.5	0.48	126	4.487	3.981	6.31	5.012	6.31	4.467	5.012	3.981	4.467	3.981	5.012
sub10	2016-05-10	47	1.5	0.48	126	3.232	1.585	3.162	1.995	2.239	1.995	3.162	2.239	3.981	3.548	4.467

## Sheet: Raw_Fig1e
ID	date	contrast	spatial frequency (c/d)	standard deviation (deg)	orientation (deg)	threshold	preliminary reversals				experimental reversals
sub1	2016-04-14	47	1.5	0.48	126	2.952	2.512	3.162	2.818	3.548	3.162	3.548	2.512	2.818	2.512	3.162
sub1	2016-04-14	47	1.5	0.48	126	4.017	3.981	5.012	3.981	4.467	3.548	3.981	3.548	5.012	3.548	4.467
sub1	2016-04-14	47	1.5	0.48	126	4.791	7.943	6.31	7.079	5.012	7.079	5.012	6.31	3.548	3.981	2.818
sub1	2016-04-14	47	1.5	0.48	126	3.976	7.943	5.012	7.079	5.623	6.31	3.162	3.548	2.818	4.467	3.548
sub1	2016-04-14	47	1.5	0.48	126	3.999	3.981	5.012	3.981	5.623	3.981	4.467	3.548	4.467	3.548	3.981
sub1	2016-04-14	47	1.5	0.48	126	3.329	3.162	4.467	3.548	5.012	3.162	3.548	2.818	3.162	2.818	4.467
sub1	2016-04-19	47	1.5	0.48	126	2.05	1.995	2.512	2.239	2.512	1.995	2.239	1.778	2.512	1.778	1.995
sub1	2016-04-19	47	1.5	0.48	126	2.849	3.981	5.012	3.548	3.981	2.818	4.467	2.239	2.512	2.239	2.818
sub1	2016-04-19	47	1.5	0.48	126	3.233	3.162	3.981	3.548	4.467	3.162	3.548	3.162	3.548	1.995	3.981
sub1	2016-04-19	47	1.5	0.48	126	4.324	5.012	7.079	5.623	6.31	4.467	5.012	3.981	4.467	3.548	4.467
sub1	2016-04-19	47	1.5	0.48	126	3.023	5.012	6.31	4.467	5.012	3.162	4.467	3.162	3.981	1.585	1.778
sub2	2016-04-14	47	1.5	0.48	126	3.203	2.512	3.548	3.162	3.548	2.512	2.818	2.512	3.548	2.818	5.012
sub2	2016-04-14	47	1.5	0.48	126	3.736	5.012	6.31	4.467	5.012	3.162	3.981	3.548	5.012	3.162	3.548
sub2	2016-04-14	47	1.5	0.48	126	3.233	1.995	2.512	1.995	2.239	1.995	3.981	3.162	3.548	3.162	3.548
sub2	2016-04-14	47	1.5	0.48	126	3.182	3.981	5.623	3.162	3.548	3.162	3.548	2.512	3.162	2.239	4.467
sub2	2016-04-14	47	1.5	0.48	126	2.249	3.162	3.981	2.239	2.512	1.995	2.512	2.239	2.512	1.995	2.239
sub2	2016-04-14	47	1.5	0.48	126	2.523	2.512	3.548	2.818	3.548	2.512	2.818	2.239	2.818	2.239	2.512
sub2	2016-04-20	47	1.5	0.48	126	1.257	7.943	5.623	6.31	1.585	1.778	1	1.259	1.122	1.259	1.122
sub2	2016-04-20	47	1.5	0.48	126	4.781	3.981	5.012	4.467	7.079	3.981	5.623	5.012	5.623	3.981	4.467
sub2	2016-04-20	47	1.5	0.48	126	2.294	2.512	3.162	1.778	2.239	1.995	2.512	2.239	2.512	1.995	2.512
sub2	2016-04-20	47	1.5	0.48	126	4.315	7.943	3.981	4.467	3.981	5.012	3.981	4.467	3.981	4.467	3.981
sub2	2016-04-20	47	1.5	0.48	126	1.689	1.995	2.512	1.995	2.239	1.778	1.995	1.585	1.778	1.413	1.585
sub3	2016-04-14	47	1.5	0.48	36	3.765	3.981	5.623	3.981	4.467	3.548	3.981	3.548	3.981	3.548	3.981
sub3	2016-04-14	47	1.5	0.48	36	2.187	2.512	3.981	3.548	4.467	2.512	2.818	1.778	2.239	1.778	1.995
sub3	2016-04-14	47	1.5	0.48	36	2.558	7.943	3.981	4.467	3.981	4.467	2.512	2.818	1.778	1.995	1.778
sub3	2016-04-14	47	1.5	0.48	36	1.505	1.995	2.512	2.239	2.818	1.259	1.778	1.413	1.585	1.413	1.585
sub3	2016-04-14	47	1.5	0.48	36	2.05	5.012	6.31	1.778	1.995	1.778	1.995	1.778	2.512	1.995	2.239
sub3	2016-04-14	47	1.5	0.48	36	3.004	7.943	4.467	5.012	3.162	3.548	2.512	3.162	2.818	3.162	2.818
sub3	2016-04-19	47	1.5	0.48	36	1.643	0.631	0.891	0.794	1.259	1	1.585	1.259	1.995	1.778	2.239
sub3	2016-04-19	47	1.5	0.48	36	1.473	3.162	3.981	2.818	3.162	1.413	1.585	1.259	1.585	1.413	1.585
sub3	2016-04-19	47	1.5	0.48	36	3.152	2.512	3.548	3.162	3.548	2.239	3.981	3.162	3.548	2.818	3.162
sub3	2016-04-19	47	1.5	0.48	36	3.248	3.162	3.981	3.162	3.548	3.162	3.981	2.818	3.162	2.818	3.548
sub3	2016-04-19	47	1.5	0.48	36	2.931	7.943	5.623	6.31	2.818	3.548	3.162	3.548	2.512	2.818	1.995
sub4	2016-04-14	47	1.5	0.48	126	4.224	7.943	3.981	4.467	3.548	4.467	3.981	4.467	3.981	4.467	3.981
sub4	2016-04-14	47	1.5	0.48	126	3.492	3.162	3.981	3.548	4.467	3.981	5.012	2.818	3.162	2.818	3.162
sub4	2016-04-14	47	1.5	0.48	126	2.895	1.259	1.995	1.413	1.995	1.778	2.818	2.512	3.548	3.162	3.548
sub4	2016-04-14	47	1.5	0.48	126	3.269	12.589	7.079	7.943	3.548	3.981	2.818	3.162	2.512	3.981	3.162
sub4	2016-04-14	47	1.5	0.48	126	2.645	3.162	3.981	3.162	3.548	2.512	3.548	2.239	2.512	2.239	2.818
sub4	2016-04-14	47	1.5	0.48	126	2.54	1.995	3.162	2.239	2.512	1.995	2.512	2.239	2.818	2.512	3.162
sub4	2016-04-20	47	1.5	0.48	126	4.607	7.943	6.31	7.079	4.467	5.012	3.548	5.623	4.467	5.012	3.981
sub4	2016-04-20	47	1.5	0.48	126	3.193	5.012	6.31	4.467	5.623	5.012	5.623	2.239	2.512	1.778	1.995
sub4	2016-04-20	47	1.5	0.48	126	2.161	5.012	6.31	1.995	2.239	1.413	1.995	1.778	2.239	1.995	3.548
sub4	2016-04-20	47	1.5	0.48	126	1.457	3.162	3.981	1.778	1.995	1.259	1.585	1.122	1.585	1.413	1.778
sub4	2016-04-20	47	1.5	0.48	126	2.54	3.162	3.981	2.818	3.162	2.512	3.162	1.995	2.818	2.239	2.512
sub5	2016-04-14	47	1.5	0.48	36	3.933	7.943	3.548	5.623	5.012	5.623	3.981	4.467	2.818	3.548	3.162
sub5	2016-04-14	47	1.5	0.48	36	3.707	7.943	5.012	5.623	5.012	6.31	3.162	3.548	3.162	3.548	2.512
sub5	2016-04-14	47	1.5	0.48	36	2.299	2.512	3.162	2.818	3.162	1.778	2.512	2.239	2.512	2.239	2.512
sub5	2016-04-14	47	1.5	0.48	36	2.398	2.512	3.162	1.995	2.818	2.512	3.162	2.512	3.162	1.259	1.778
sub5	2016-04-14	47	1.5	0.48	36	2.353	2.512	3.162	1.585	2.239	1.995	2.239	1.585	2.512	2.239	3.548
sub5	2016-04-14	47	1.5	0.48	36	3.645	3.981	5.012	3.981	4.467	3.162	3.981	3.548	4.467	3.162	3.548
sub5	2016-04-20	47	1.5	0.48	36	3.055	2.512	3.162	2.818	3.162	2.818	3.162	2.818	3.162	2.818	3.548
sub5	2016-04-20	47	1.5	0.48	36	3.176	3.162	3.981	3.162	3.548	3.162	3.548	2.818	3.548	2.818	3.162
sub5	2016-04-20	47	1.5	0.48	36	2.961	3.162	4.467	3.981	4.467	3.981	4.467	1.995	2.512	1.995	2.818
sub5	2016-04-20	47	1.5	0.48	36	3.846	1.995	2.818	2.512	3.981	3.548	4.467	3.548	3.981	3.548	3.981
sub5	2016-04-20	47	1.5	0.48	36	2.492	3.162	3.981	3.548	3.981	3.162	3.981	1.995	2.818	1.413	1.585
sub6	2016-04-15	47	1.5	0.48	36	2.665	1.995	2.818	2.512	2.818	2.512	2.818	2.512	2.818	2.512	2.818
sub6	2016-04-15	47	1.5	0.48	36	3.089	1.995	2.818	2.512	2.818	2.512	2.818	2.512	3.548	3.162	3.981
sub6	2016-04-15	47	1.5	0.48	36	2.54	3.981	5.012	3.548	3.981	1.995	2.512	2.239	3.162	2.512	2.818
sub6	2016-04-15	47	1.5	0.48	36	2.58	3.162	5.012	2.512	3.162	2.818	3.162	2.239	2.512	2.239	2.512
sub6	2016-04-15	47	1.5	0.48	36	3.247	7.943	3.162	3.548	3.162	3.548	3.162	3.548	2.512	3.548	3.162
sub6	2016-04-15	47	1.5	0.48	36	3.37	3.162	4.467	3.162	3.981	3.162	3.548	2.818	3.548	3.162	3.981
sub6	2016-04-22	47	1.5	0.48	36	3.321	7.943	3.981	4.467	2.512	3.162	2.818	3.981	3.162	3.981	2.818
sub6	2016-04-22	47	1.5	0.48	36	2.768	1.995	3.162	2.512	3.548	2.512	2.818	2.239	2.818	2.239	3.981
sub6	2016-04-22	47	1.5	0.48	36	2.712	7.943	2.818	3.548	3.162	3.548	2.818	3.162	1.995	2.512	2.239
sub6	2016-04-22	47	1.5	0.48	36	3.112	2.512	3.162	2.818	3.548	3.162	3.548	2.818	3.162	2.818	3.162
sub6	2016-04-22	47	1.5	0.48	36	2.88762	0.124564	2.512	1.585	2.239	1.413	1.778	1.259	1.585	1.259	1.585
sub7	2016-04-17	47	1.5	0.48	36	7.978	5.012	8.913	7.943	8.913	7.079	8.913	7.943	8.913	7.079	7.943
sub7	2016-04-17	47	1.5	0.48	36	7.269	3.981	5.012	4.467	6.31	5.623	7.943	7.079	7.943	7.079	7.943
sub7	2016-04-17	47	1.5	0.48	36	5.016	3.162	3.981	3.548	3.981	3.548	5.623	3.981	5.623	5.012	6.31
sub7	2016-04-17	47	1.5	0.48	36	7.541	7.943	4.467	5.012	4.467	5.012	4.467	8.913	7.943	10	8.913
sub7	2016-04-17	47	1.5	0.48	36	5.341	10	6.31	7.943	5.012	6.31	5.012	5.623	4.467	5.623	5.012
sub7	2016-04-17	47	1.5	0.48	36	7.45	7.943	6.31	7.079	6.31	8.913	6.31	7.943	6.31	8.913	6.31
sub7	2016-04-25	47	1.5	0.48	36	5.067	7.943	5.623	6.31	5.623	6.31	5.012	5.623	4.467	5.012	3.981
sub7	2016-04-25	47	1.5	0.48	36	5.06	10	7.943	8.913	5.623	6.31	5.623	6.31	3.981	5.623	2.512
sub7	2016-04-25	47	1.5	0.48	36	4.653	10	7.943	8.913	6.31	8.913	4.467	5.012	3.162	3.548	2.818
sub7	2016-04-25	47	1.5	0.48	36	4.83	7.943	6.31	7.079	6.31	7.079	3.981	5.012	4.467	5.623	2.818
sub7	2016-04-25	47	1.5	0.48	36	4.345	5.012	6.31	3.981	4.467	3.981	4.467	3.548	4.467	3.981	5.623
sub8	2016-04-16	47	1.5	0.48	126	3.724	3.162	3.981	3.548	3.981	3.548	3.981	2.818	4.467	3.548	3.981
sub8	2016-04-16	47	1.5	0.48	126	4.09	3.162	3.981	3.548	5.012	3.548	3.981	3.548	4.467	3.981	5.012
sub8	2016-04-16	47	1.5	0.48	126	3.968	7.943	4.467	5.012	3.981	5.012	3.981	4.467	2.818	3.981	3.548
sub8	2016-04-16	47	1.5	0.48	126	4.688	3.981	5.012	4.467	5.623	4.467	5.623	3.548	5.012	4.467	5.012
sub8	2016-04-16	47	1.5	0.48	126	2.728	1.585	2.818	2.239	3.162	2.818	3.162	2.239	2.818	2.512	2.818
sub8	2016-04-16	47	1.5	0.48	126	2.753	5.012	6.31	3.981	4.467	3.162	3.548	2.239	2.818	2.239	2.512
sub8	2016-04-22	47	1.5	0.48	126	2.373	1.995	2.512	2.239	2.512	1.778	1.995	1.585	3.548	2.512	2.818
sub8	2016-04-22	47	1.5	0.48	126	3.587	3.981	5.012	4.467	5.012	3.981	4.467	2.818	3.548	2.239	4.467
sub8	2016-04-22	47	1.5	0.48	126	4.26	5.012	6.31	4.467	6.31	5.012	6.31	3.548	3.981	3.162	3.548
sub8	2016-04-22	47	1.5	0.48	126	4.332	5.012	6.31	3.162	3.981	3.548	3.981	3.162	6.31	3.981	5.012
sub8	2016-04-22	47	1.5	0.48	126	4.426	3.162	3.981	3.162	5.012	4.467	5.623	3.981	4.467	3.548	4.467

## Sheet: Raw_Fig1f
ID	date	contrast	spatial frequency (c/d)	standard deviation (deg)	orientation (deg)	threshold	preliminary reversals				experimental reversals
sub1	2015-06-15	47	1.5	0.48	36	3.638	3.981	5.012	3.981	5.012	2.818	3.162	2.818	5.012	3.548	4.467
sub1	2015-06-15	47	1.5	0.48	36	3.055	7.943	3.981	4.467	3.162	3.548	2.818	3.162	2.818	3.162	2.818
sub1	2015-06-15	47	1.5	0.48	36	1.183	1.259	1.585	1.413	1.778	1.259	1.413	0.891	1.122	1	1.413
sub1	2015-06-15	47	1.5	0.48	36	2.561	1.585	1.995	1.585	1.995	1.778	3.162	2.512	3.162	2.239	2.512
sub1	2015-06-15	47	1.5	0.48	36	4.196	3.162	3.981	2.818	3.162	2.239	5.012	4.467	5.012	3.981	4.467
sub1	2015-06-15	47	1.5	0.48	36	3.369	3.162	3.981	3.162	3.548	2.512	3.162	2.818	5.012	3.162	3.548
sub1	2015-06-15	47	1.5	0.48	126	2.849	7.943	2.818	3.162	2.239	2.818	2.239	2.512	1.995	3.981	3.548
sub1	2015-06-15	47	1.5	0.48	126	2.958	2.512	3.162	2.512	2.818	2.239	3.162	2.818	3.548	2.818	3.162
sub1	2015-06-15	47	1.5	0.48	126	3.043	1.585	2.818	2.239	2.512	2.239	2.818	2.512	3.548	3.162	3.981
sub1	2015-06-15	47	1.5	0.48	126	3.5	3.162	3.981	3.162	3.548	3.162	3.981	3.162	3.981	3.162	3.548
sub1	2015-06-15	47	1.5	0.48	126	2.888	1.995	3.162	2.818	3.162	2.818	3.162	2.512	3.162	2.512	3.162
sub1	2015-06-15	47	1.5	0.48	126	3.112	2.512	3.981	2.818	3.548	3.162	3.548	2.818	3.162	2.818	3.162
sub1	2015-06-16	47	1.5	0.48	36	1.958	1.259	1.585	1.259	1.413	1.122	1.778	1.585	2.512	2.239	2.512
sub1	2015-06-16	47	1.5	0.48	36	2.299	1.259	1.778	1.585	2.239	1.778	2.512	2.239	2.512	2.239	2.512
sub1	2015-06-16	47	1.5	0.48	36	3.852	3.981	5.012	4.467	5.012	3.981	5.623	3.548	3.981	2.818	3.162
sub1	2015-06-16	47	1.5	0.48	36	3.094	2.512	3.162	2.818	3.548	2.818	3.162	2.512	2.818	2.239	5.012
sub1	2015-06-16	47	1.5	0.48	36	3.089	3.162	3.981	3.548	3.981	2.512	3.548	3.162	3.981	2.512	2.818
sub1	2015-06-16	47	1.5	0.48	36	3.355	2.512	3.548	3.162	3.548	3.162	3.548	3.162	3.548	3.162	3.548
sub1	2015-06-16	47	1.5	0.48	36	3.125	5.012	6.31	2.818	3.162	2.818	3.162	2.512	3.548	3.162	3.548
sub1	2015-06-16	47	1.5	0.48	36	2.086	1.995	2.818	2.512	2.818	1.995	2.239	1.995	2.512	1.778	1.995
sub1	2015-06-16	47	1.5	0.48	36	2.947	3.162	3.981	2.512	3.548	3.162	3.548	2.239	2.512	2.239	3.981
sub1	2015-06-16	47	1.5	0.48	36	3.968	3.981	5.012	3.981	4.467	3.981	4.467	3.981	5.012	2.818	3.548
sub1	2015-06-17	47	1.5	0.48	36	2.99	3.981	5.623	4.467	5.012	2.818	3.162	2.818	3.162	2.818	3.162
sub1	2015-06-17	47	1.5	0.48	36	1.977	3.981	5.012	3.548	4.467	1.995	2.512	1.585	1.995	1.778	1.995
sub1	2015-06-17	47	1.5	0.48	36	2.99	5.012	6.31	3.162	3.548	2.818	3.162	2.818	3.162	2.818	3.162
sub1	2015-06-17	47	1.5	0.48	36	4.952	5.012	6.31	5.012	5.623	3.548	5.623	4.467	5.012	3.981	7.079
sub1	2015-06-17	47	1.5	0.48	36	4.452	3.981	5.012	3.162	3.548	3.162	4.467	3.981	5.012	4.467	5.623
sub1	2015-06-17	47	1.5	0.48	36	1.531	3.162	3.981	1.585	1.778	1.413	1.585	1.413	1.585	1.413	1.778
sub1	2015-06-17	47	1.5	0.48	36	2.947	3.981	5.623	3.981	4.467	3.162	3.548	2.239	2.512	2.239	3.981
sub1	2015-06-17	47	1.5	0.48	36	3.111	3.162	4.467	3.548	3.981	3.548	3.981	1.995	3.162	2.818	3.162
sub1	2015-06-17	47	1.5	0.48	36	2.878	2.512	3.162	2.818	5.623	4.467	5.012	1.778	1.995	1.778	2.239
sub1	2015-06-17	47	1.5	0.48	36	1.865	3.162	3.981	1.995	2.239	1.585	1.995	1.413	1.778	1.259	3.162
sub1	2015-06-18	47	1.5	0.48	36	1.711	1	1.259	1.122	1.413	1.259	1.585	1.413	1.995	1.778	2.239
sub1	2015-06-18	47	1.5	0.48	36	2.249	3.162	3.981	1.995	2.239	1.995	2.239	1.995	2.512	2.239	2.512
sub1	2015-06-18	47	1.5	0.48	36	1.823	3.162	4.467	2.512	2.818	2.239	2.512	1.413	1.585	1.413	1.778
sub1	2015-06-18	47	1.5	0.48	36	2.258	1	1.995	1.778	1.995	1.778	2.512	1.995	2.512	2.239	2.512
sub1	2015-06-18	47	1.5	0.48	36	1.242	1.259	1.585	1.259	1.413	1.122	1.413	1.122	1.413	1.122	1.259
sub1	2015-06-18	47	1.5	0.48	36	1.395	1.259	1.585	1.122	1.259	0.891	1.122	1	1.995	1.585	1.778
sub1	2015-06-18	47	1.5	0.48	36	1.689	3.162	4.467	3.162	3.548	1.585	1.778	1.413	1.778	1.585	1.995
sub1	2015-06-18	47	1.5	0.48	36	2.117	1.995	2.512	1.995	2.818	1.995	2.239	1.995	2.239	1.995	2.239
sub1	2015-06-18	47	1.5	0.48	36	1.602	1.995	2.818	1.778	1.995	1.259	1.585	1.413	1.778	1.585	1.995
sub1	2015-06-18	47	1.5	0.48	36	1.512	3.162	3.981	1.413	1.585	1.259	1.778	1.585	1.778	1.259	1.413
sub1	2015-06-19	47	1.5	0.48	36	3.002	5.012	6.31	3.981	4.467	3.981	4.467	2.512	2.818	1.995	2.239
sub1	2015-06-19	47	1.5	0.48	36	1.448	2.512	3.162	1.995	2.239	1.778	1.995	1.122	1.259	1.122	1.413
sub1	2015-06-19	47	1.5	0.48	36	2.626	3.162	3.981	2.512	2.818	2.512	3.162	2.512	2.818	2.239	2.512
sub1	2015-06-19	47	1.5	0.48	36	1.589	1.585	1.995	1.585	1.778	1.259	2.239	1.585	1.778	1.259	1.413
sub1	2015-06-19	47	1.5	0.48	36	2.49	1.995	3.162	1.995	2.239	1.778	2.239	1.778	3.162	2.818	3.162
sub1	2015-06-19	47	1.5	0.48	36	2.3	1.585	1.995	1.778	2.818	2.512	2.818	1.995	2.239	1.995	2.239
sub1	2015-06-19	47	1.5	0.48	36	2.177	7.943	2.818	3.162	2.239	2.818	1.778	2.239	1.995	2.239	1.995
sub1	2015-06-19	47	1.5	0.48	36	1.798	1	1.585	1.413	1.995	1.778	2.239	1.995	2.239	1.122	1.413
sub1	2015-06-19	47	1.5	0.48	36	1.525	1.259	1.585	0.891	1.413	1.259	1.995	1.778	1.995	1	1.122
sub1	2015-06-19	47	1.5	0.48	36	1.566	1.585	1.995	1.778	1.995	1.585	1.778	1.585	1.778	1.259	1.413
sub1	2015-06-21	47	1.5	0.48	36	1.37	3.981	5.012	3.548	3.981	1.259	1.585	1.259	1.585	1.122	1.413
sub1	2015-06-21	47	1.5	0.48	36	1.92	1.995	2.818	2.239	2.512	2.239	2.512	1.413	1.995	1.585	1.778
sub1	2015-06-21	47	1.5	0.48	36	0.989	1.259	1.585	1.259	1.413	0.891	1.259	0.891	1	0.891	1
sub1	2015-06-21	47	1.5	0.48	36	1.213	1.585	2.239	1.778	1.995	1.585	1.778	1	1.122	0.794	1
sub1	2015-06-21	47	1.5	0.48	36	1.179	1.585	2.239	1.585	1.778	1.122	1.778	1	1.122	0.794	1.259
sub1	2015-06-21	47	1.5	0.48	36	0.911	1.995	2.512	1.585	1.778	0.891	1	0.891	1	0.794	0.891
sub1	2015-06-21	47	1.5	0.48	36	1.107	1.259	1.585	1.413	1.585	1	1.122	1	1.259	1	1.259
sub1	2015-06-21	47	1.5	0.48	36	0.954	1	1.259	0.794	0.891	0.794	0.891	0.794	1.122	1	1.122
sub1	2015-06-21	47	1.5	0.48	36	1.431	1.585	1.995	1.778	2.239	1.585	1.778	1.259	1.585	1.122	1.259
sub1	2015-06-21	47	1.5	0.48	36	1.689	1.259	1.585	1.413	1.585	1.413	1.778	1.585	1.778	1.585	1.995
sub1	2015-06-22	47	1.5	0.48	36	0.776	1.585	1.995	0.891	1.413	0.708	0.794	0.631	0.891	0.631	1
sub1	2015-06-22	47	1.5	0.48	36	1.689	1.995	2.512	1.778	1.995	1.413	1.778	1.585	1.995	1.585	1.778
sub1	2015-06-22	47	1.5	0.48	36	2.866	5.012	6.31	3.981	4.467	3.162	4.467	2.512	2.818	1.995	2.239
sub1	2015-06-22	47	1.5	0.48	36	1.244	2.512	3.162	1.778	1.995	1.122	1.778	1.259	1.413	0.891	1
sub1	2015-06-22	47	1.5	0.48	126	3.499	7.943	5.012	5.623	5.012	5.623	3.548	3.981	2.512	2.818	2.512
sub1	2015-06-22	47	1.5	0.48	126	2.85	3.162	5.012	3.548	5.012	3.162	3.548	2.239	2.818	2.512	2.818
sub1	2015-06-22	47	1.5	0.48	126	2.04	2.512	3.548	2.818	4.467	1.995	2.239	1.995	2.239	1.778	1.995
sub1	2015-06-22	47	1.5	0.48	126	3.334	5.012	6.31	5.012	5.623	2.512	3.162	2.818	3.981	3.548	3.981
sub1	2015-06-22	47	1.5	0.48	126	1.823	1.259	1.995	1.585	1.778	1.413	1.585	1.413	1.778	1.585	3.162
sub2	2015-06-16	47	1.5	0.48	36	6.187	5.012	7.943	6.31	7.079	6.31	7.943	6.31	7.079	4.467	5.012
sub2	2015-06-16	47	1.5	0.48	36	3.466	2.512	3.162	2.818	3.162	2.818	4.467	3.548	3.981	2.818	3.162
sub2	2015-06-16	47	1.5	0.48	36	4.223	5.012	7.079	4.467	5.012	2.818	4.467	3.981	5.623	3.981	4.467
sub2	2015-06-16	47	1.5	0.48	36	2.849	3.162	5.012	4.467	5.012	3.548	3.981	2.239	2.818	1.995	2.512
sub2	2015-06-16	47	1.5	0.48	36	2.721	1.995	2.512	2.239	2.818	2.239	2.512	1.778	2.818	2.512	4.467
sub2	2015-06-16	47	1.5	0.48	36	2.591	3.162	3.981	3.162	3.548	2.818	3.162	1.995	2.512	2.239	2.818
sub2	2015-06-16	47	1.5	0.48	126	5.034	2.512	5.623	4.467	6.31	5.012	5.623	4.467	5.623	4.467	5.012
sub2	2015-06-16	47	1.5	0.48	126	3.587	5.012	6.31	3.981	4.467	3.162	3.548	2.818	4.467	3.548	3.981
sub2	2015-06-16	47	1.5	0.48	126	3.182	3.162	3.981	3.548	3.981	3.162	3.548	3.162	3.548	2.512	3.162
sub2	2015-06-16	47	1.5	0.48	126	5.003	3.981	5.012	3.162	4.467	3.981	5.012	4.467	5.012	4.467	7.079
sub2	2015-06-16	47	1.5	0.48	126	2.785	2.512	3.162	2.818	3.162	1.995	3.162	2.239	3.981	2.512	2.818
sub2	2015-06-16	47	1.5	0.48	126	3.427	3.981	5.623	3.162	3.548	3.162	3.548	3.162	3.981	3.162	3.548
sub2	2015-06-19	47	1.5	0.48	36	1.648	1.585	1.995	1.413	1.585	1.122	1.995	1.413	1.778	1.585	1.995
sub2	2015-06-19	47	1.5	0.48	36	1.17	1.995	2.512	1	1.122	1	1.259	1.122	1.259	1.122	1.259
sub2	2015-06-19	47	1.5	0.48	36	2.169	10	3.548	4.467	3.981	4.467	1.778	1.995	1.585	1.778	1.413
sub2	2015-06-19	47	1.5	0.48	36	2.888	1.995	2.512	2.239	3.162	2.512	3.162	2.512	3.162	2.818	3.162
sub2	2015-06-19	47	1.5	0.48	36	2.838	5.012	6.31	2.239	3.162	2.818	3.548	2.512	2.818	2.512	2.818
sub2	2015-06-19	47	1.5	0.48	36	1.794	1.995	2.512	1.585	1.778	1.585	1.995	1.585	2.239	1.585	1.778
sub2	2015-06-19	47	1.5	0.48	36	2.494	3.981	5.012	2.818	3.548	2.818	3.162	2.239	2.512	1.995	2.239
sub2	2015-06-19	47	1.5	0.48	36	2.745	2.512	3.162	2.818	3.162	2.512	2.818	1.995	3.162	2.818	3.162
sub2	2015-06-19	47	1.5	0.48	36	2.08	2.512	3.162	2.239	2.512	2.239	2.512	2.239	2.818	1.259	1.413
sub2	2015-06-19	47	1.5	0.48	36	2.785	3.981	5.012	2.818	3.162	2.818	3.162	2.239	3.162	2.512	2.818
sub2	2015-06-20	47	1.5	0.48	36	2.194	1.995	3.162	1.995	2.239	1.995	3.162	1.995	2.239	1.778	1.995
sub2	2015-06-20	47	1.5	0.48	36	1.954	5.012	7.079	5.623	6.31	2.818	3.162	1.585	1.778	1.122	1.259
sub2	2015-06-20	47	1.5	0.48	36	3.542	3.162	5.012	3.981	4.467	2.818	5.012	3.162	3.548	3.162	3.548
sub2	2015-06-20	47	1.5	0.48	36	3.564	3.981	5.623	3.981	4.467	3.162	3.548	3.162	3.981	3.548	3.981
sub2	2015-06-20	47	1.5	0.48	36	3.385	3.162	3.981	2.512	3.981	3.162	4.467	3.981	4.467	1.995	2.239
sub2	2015-06-20	47	1.5	0.48	36	2.421	5.012	6.31	2.239	2.512	1.995	2.239	1.995	3.548	2.239	2.512
sub2	2015-06-20	47	1.5	0.48	36	2.426	3.162	3.981	3.162	3.548	2.239	2.512	2.239	2.512	2.239	2.818
sub2	2015-06-20	47	1.5	0.48	36	1.842	7.943	4.467	5.012	2.512	2.818	1.995	2.239	1.413	1.585	1
sub2	2015-06-20	47	1.5	0.48	36	2.895	7.943	2.512	2.818	2.239	2.818	2.512	3.548	3.162	3.548	1.778
sub2	2015-06-20	47	1.5	0.48	36	1.621	1.995	2.512	1.995	2.512	1.585	1.778	1.585	1.778	1.413	1.585
sub2	2015-06-24	47	1.5	0.48	36	2.87	7.943	3.981	4.467	3.162	3.981	3.162	3.548	2.239	2.512	1.778
sub2	2015-06-24	47	1.5	0.48	36	1.029	7.943	2.818	3.162	1.995	2.239	0.794	0.891	0.562	0.891	0.794
sub2	2015-06-24	47	1.5	0.48	36	2.417	3.981	5.623	2.818	3.162	2.818	3.162	1.778	2.239	1.995	2.512
sub2	2015-06-24	47	1.5	0.48	36	2.321	3.162	3.981	2.512	3.162	2.239	2.512	2.239	3.162	1.778	1.995
sub2	2015-06-24	47	1.5	0.48	36	2.688	3.981	5.012	3.981	4.467	3.162	3.548	3.162	3.548	1.122	1.585
sub2	2015-06-24	47	1.5	0.48	36	1.244	1.585	1.995	1.413	1.778	1.259	1.413	1.259	1.413	1	1.122
sub2	2015-06-24	47	1.5	0.48	36	0.505	1	1.413	0.708	0.794	0.501	0.631	0.447	0.501	0.447	0.501
sub2	2015-06-24	47	1.5	0.48	36	2.962	3.981	5.012	3.981	4.467	3.548	4.467	2.818	3.162	1.778	1.995
sub2	2015-06-24	47	1.5	0.48	36	2.986	3.981	5.623	3.981	4.467	3.548	3.981	2.512	2.818	2.239	2.818
sub2	2015-06-24	47	1.5	0.48	36	2.472	1.995	3.162	2.512	2.818	2.512	2.818	2.239	2.512	2.239	2.512
sub2	2015-06-25	47	1.5	0.48	36	1.031	1.259	1.585	1.413	1.778	1.259	1.413	0.794	0.891	0.708	1.122
sub2	2015-06-25	47	1.5	0.48	36	1.895	7.943	4.467	5.012	1.995	2.239	1.778	1.995	1.585	1.995	1.778
sub2	2015-06-25	47	1.5	0.48	36	1.895	2.512	3.162	1.995	2.239	1.778	1.995	1.778	1.995	1.585	2.239
sub2	2015-06-25	47	1.5	0.48	36	2.645	7.943	3.548	3.981	3.162	3.548	2.512	2.818	2.239	2.512	2.239
sub2	2015-06-25	47	1.5	0.48	36	3.112	3.162	3.981	3.548	3.981	3.162	3.548	2.818	3.162	2.818	3.162
sub2	2015-06-25	47	1.5	0.48	36	1.495	2.512	3.162	1.585	2.239	1.995	2.239	1.259	1.585	0.891	1
sub2	2015-06-25	47	1.5	0.48	36	3.127	3.981	5.012	2.818	3.162	2.818	3.162	2.818	3.162	2.818	3.981
sub2	2015-06-25	47	1.5	0.48	36	3.112	7.943	3.162	3.548	2.818	3.162	2.818	3.162	2.818	3.548	3.162
sub2	2015-06-25	47	1.5	0.48	36	0.756	1.995	2.512	1.585	1.995	1	1.122	0.708	0.794	0.282	0.631
sub2	2015-06-25	47	1.5	0.48	36	4.003	7.943	5.623	6.31	4.467	5.012	4.467	5.012	3.548	3.981	1.995
sub2	2015-06-26	47	1.5	0.48	36	2.494	1.995	2.818	2.239	2.818	2.239	3.162	2.818	3.162	1.585	1.995
sub2	2015-06-26	47	1.5	0.48	36	2.081	5.012	6.31	1.995	2.239	1.778	2.239	1.995	2.239	1.995	2.239
sub2	2015-06-26	47	1.5	0.48	36	2.263	3.981	5.012	3.162	3.981	2.818	3.162	1.995	2.239	1.585	1.778
sub2	2015-06-26	47	1.5	0.48	36	2.345	1.995	3.162	2.239	2.818	2.512	2.818	1.995	2.512	1.995	2.239
sub2	2015-06-26	47	1.5	0.48	36	3.507	3.981	5.012	3.981	4.467	3.162	3.548	2.818	3.981	3.548	3.981
sub2	2015-06-26	47	1.5	0.48	36	2.212	1.995	2.818	2.239	2.818	2.512	2.818	2.239	2.512	1.413	1.778
sub2	2015-06-27	47	1.5	0.48	36	1.425	1.995	2.512	1.259	1.413	1.122	1.585	1.413	1.585	1.259	1.585
sub2	2015-06-27	47	1.5	0.48	36	2.375	1.995	2.512	2.239	2.512	2.239	2.512	2.239	2.512	2.239	2.512
sub2	2015-06-27	47	1.5	0.48	36	2.34	7.943	6.31	7.079	2.512	2.818	2.239	2.512	2.239	2.818	1.413
sub2	2015-06-27	47	1.5	0.48	36	1.784	3.162	4.467	1.585	1.995	1.778	2.239	1.778	2.239	1.259	1.413
sub2	2015-06-27	47	1.5	0.48	36	1.109	0.631	1.122	1	1.122	1	1.413	1	1.122	1	1.122
sub2	2015-06-27	47	1.5	0.48	36	2.176	7.943	3.981	4.467	1.585	1.778	1.585	2.239	1.778	3.162	2.512
sub2	2015-06-27	47	1.5	0.48	126	2.58	10	3.981	4.467	2.818	3.162	2.512	2.818	2.239	2.512	2.239
sub2	2015-06-27	47	1.5	0.48	126	3.185	3.162	3.981	3.548	4.467	3.981	4.467	2.512	2.818	2.512	2.818
sub2	2015-06-27	47	1.5	0.48	126	2.787	7.943	6.31	7.079	3.162	3.548	2.512	2.818	2.512	2.818	2.512
sub2	2015-06-27	47	1.5	0.48	126	3.14	5.012	6.31	5.623	6.31	3.548	3.981	2.818	3.162	2.512	2.818
sub2	2015-06-27	47	1.5	0.48	126	3.872	2.512	4.467	3.981	4.467	3.981	5.012	3.548	3.981	3.162	3.548
sub3	2015-06-16	47	1.5	0.48	36	3.977	5.012	7.943	3.981	5.012	4.467	5.012	3.548	4.467	2.818	3.548
sub3	2015-06-16	47	1.5	0.48	36	3.355	5.012	6.31	3.981	4.467	3.162	3.548	3.162	3.548	3.162	3.548
sub3	2015-06-16	47	1.5	0.48	36	4.932	5.012	6.31	5.623	7.079	5.012	5.623	4.467	5.012	4.467	5.012
sub3	2015-06-16	47	1.5	0.48	36	3.897	5.012	6.31	3.981	4.467	3.981	5.623	3.981	4.467	2.512	2.818
sub3	2015-06-16	47	1.5	0.48	36	2.375	1.995	2.512	2.239	2.818	2.239	2.512	2.239	2.512	2.239	2.512
sub3	2015-06-16	47	1.5	0.48	36	2.952	3.162	4.467	3.548	3.981	3.162	3.548	2.512	3.981	1.995	2.512
sub3	2015-06-16	47	1.5	0.48	126	4.919	3.162	4.467	3.981	4.467	3.981	4.467	3.981	6.31	4.467	6.31
sub3	2015-06-16	47	1.5	0.48	126	5.341	5.012	6.31	5.012	6.31	5.012	5.623	5.012	5.623	4.467	6.31
sub3	2015-06-16	47	1.5	0.48	126	4.765	3.162	4.467	3.162	3.981	3.162	5.623	5.012	5.623	3.548	5.623
sub3	2015-06-16	47	1.5	0.48	126	3.08	3.981	5.012	4.467	5.012	3.162	3.548	2.239	3.162	2.818	3.548
sub3	2015-06-16	47	1.5	0.48	126	2.939	1.259	2.512	2.239	2.512	1.995	3.162	2.818	3.162	2.512	3.981
sub3	2015-06-16	47	1.5	0.48	126	2.799	3.162	5.012	4.467	5.012	3.162	3.548	2.512	2.818	2.239	2.512
sub3	2015-06-17	47	1.5	0.48	126	4.07	5.012	6.31	4.467	5.012	3.548	3.981	2.818	4.467	3.981	5.623
sub3	2015-06-17	47	1.5	0.48	126	3.37	5.012	6.31	4.467	5.012	3.548	3.981	3.162	3.548	2.818	3.162
sub3	2015-06-17	47	1.5	0.48	126	3.094	1.995	2.512	2.239	3.162	2.818	3.981	3.548	3.981	1.995	2.239
sub3	2015-06-17	47	1.5	0.48	126	5.557	5.012	6.31	5.623	7.079	5.623	6.31	5.623	6.31	4.467	5.012
sub3	2015-06-17	47	1.5	0.48	126	3.741	3.981	5.012	3.981	4.467	3.981	4.467	3.162	3.548	2.818	4.467
sub3	2015-06-17	47	1.5	0.48	126	3.298	3.981	5.012	3.162	3.548	2.818	3.548	3.162	3.548	3.162	3.548
sub3	2015-06-17	47	1.5	0.48	126	1.487	1.995	2.512	1.259	1.413	1.259	1.413	1.259	1.585	1.413	1.995
sub3	2015-06-17	47	1.5	0.48	126	3.466	3.981	5.012	3.981	4.467	3.981	4.467	2.818	3.548	2.818	3.162
sub3	2015-06-17	47	1.5	0.48	126	2.214	2.512	3.548	2.818	3.548	1.995	2.818	1.995	2.239	1.995	2.239
sub3	2015-06-17	47	1.5	0.48	126	2.677	1.259	1.995	1.778	2.818	2.512	2.818	2.239	2.818	2.512	3.162
sub3	2015-06-18	47	1.5	0.48	126	3.37	2.512	3.981	3.548	3.981	3.548	3.981	3.162	3.548	2.818	3.162
sub3	2015-06-18	47	1.5	0.48	126	2.141	1.995	2.512	2.239	2.512	1.995	2.239	1.778	2.239	1.778	2.818
sub3	2015-06-18	47	1.5	0.48	126	3.862	5.012	6.31	3.981	4.467	3.981	4.467	3.548	4.467	3.162	3.548
sub3	2015-06-18	47	1.5	0.48	126	1.887	2.512	3.162	2.818	3.162	1.778	1.995	1.778	1.995	1.778	1.995
sub3	2015-06-18	47	1.5	0.48	126	1.887	1.585	1.995	1.585	1.995	1.778	1.995	1.778	1.995	1.778	1.995
sub3	2015-06-18	47	1.5	0.48	126	2.396	2.512	3.162	1.778	2.818	2.512	2.818	1.995	2.818	1.995	2.239
sub3	2015-06-18	47	1.5	0.48	126	2.357	2.512	3.548	2.512	3.548	2.239	2.512	1.995	2.239	1.995	3.162
sub3	2015-06-18	47	1.5	0.48	126	2.907	1.995	2.512	2.239	3.162	2.512	3.548	2.239	3.162	2.818	3.162
sub3	2015-06-18	47	1.5	0.48	126	2.494	3.162	3.981	3.548	4.467	1.995	2.818	2.239	2.512	2.239	3.162
sub3	2015-06-18	47	1.5	0.48	126	2.523	2.512	3.162	1.995	2.818	2.512	2.818	2.239	2.512	2.239	2.818
sub3	2015-06-19	47	1.5	0.48	126	2.004	5.012	7.079	3.548	6.31	1.778	2.239	1.995	2.239	1.778	1.995
sub3	2015-06-19	47	1.5	0.48	126	2.012	1.585	3.162	1.995	2.239	1.585	2.239	1.778	2.239	1.995	2.239
sub3	2015-06-19	47	1.5	0.48	126	2.249	3.162	3.981	3.548	3.981	2.239	2.512	1.995	2.239	1.995	2.512
sub3	2015-06-19	47	1.5	0.48	126	2.045	5.012	6.31	5.623	6.31	1.995	2.239	1.778	2.239	1.778	2.239
sub3	2015-06-19	47	1.5	0.48	126	1.893	2.512	3.162	2.818	3.162	2.818	3.162	1.259	1.413	1.122	1.585
sub3	2015-06-19	47	1.5	0.48	126	2.677	2.512	3.162	2.818	3.162	2.512	2.818	2.239	2.818	2.512	3.162
sub3	2015-06-19	47	1.5	0.48	126	2.677	2.512	3.162	2.818	3.162	2.818	3.162	2.512	2.818	2.239	2.512
sub3	2015-06-19	47	1.5	0.48	126	2.853	3.981	5.012	3.548	3.981	2.818	3.162	2.818	3.162	1.995	3.162
sub3	2015-06-19	47	1.5	0.48	126	2.939	2.512	3.162	2.512	2.818	2.512	3.162	2.818	3.162	2.818	3.162
sub3	2015-06-19	47	1.5	0.48	126	2.802	2.512	3.162	2.512	2.818	2.512	3.162	1.995	3.162	2.818	3.162
sub3	2015-06-21	47	1.5	0.48	126	2.391	3.162	3.981	3.162	3.548	2.512	2.818	1.995	2.512	1.995	2.512
sub3	2015-06-21	47	1.5	0.48	126	4.396	3.981	5.012	4.467	6.31	4.467	5.012	3.981	4.467	3.981	4.467
sub3	2015-06-21	47	1.5	0.48	126	2.472	3.162	3.981	3.162	3.548	2.512	2.818	2.239	2.512	2.239	2.512
sub3	2015-06-21	47	1.5	0.48	126	3.66	3.981	5.012	4.467	5.623	2.818	3.981	3.548	4.467	3.162	3.981
sub3	2015-06-21	47	1.5	0.48	126	4.224	5.012	6.31	4.467	5.012	3.981	4.467	3.981	4.467	3.981	4.467
sub3	2015-06-21	47	1.5	0.48	126	2.155	3.981	5.012	4.467	5.623	1.778	2.512	1.585	2.239	1.995	2.818
sub3	2015-06-21	47	1.5	0.48	126	1.941	1.585	1.995	1.585	1.778	1.585	1.995	1.778	1.995	1.778	2.512
sub3	2015-06-21	47	1.5	0.48	126	1.811	1.259	2.239	1.778	2.512	1.995	2.512	1.585	1.778	1.413	1.585
sub3	2015-06-21	47	1.5	0.48	126	1.935	2.512	3.162	2.239	2.512	2.239	2.818	1.413	1.778	1.585	1.778
sub3	2015-06-21	47	1.5	0.48	126	1.981	2.512	3.162	2.512	2.818	1.995	3.162	1.585	1.778	1.585	1.778
sub3	2015-06-22	47	1.5	0.48	126	3.334	3.162	3.981	2.818	3.981	3.548	3.981	3.162	3.981	2.512	2.818
sub3	2015-06-22	47	1.5	0.48	126	1.875	1.585	1.995	1.413	1.778	1.585	1.778	1.413	2.239	1.995	2.239
sub3	2015-06-22	47	1.5	0.48	126	2.126	2.512	3.162	2.512	2.818	1.995	2.239	1.778	2.239	1.995	2.512
sub3	2015-06-22	47	1.5	0.48	126	2.693	2.512	3.548	3.162	3.548	3.162	3.548	2.512	3.162	1.778	1.995
sub3	2015-06-22	47	1.5	0.48	126	1.596	2.512	3.548	2.239	2.512	1.585	1.995	1.413	1.585	1.413	1.585
sub3	2015-06-22	47	1.5	0.48	126	1.39	7.943	5.623	6.31	1.778	1.995	1.259	1.413	1.259	1.413	1
sub3	2015-06-22	47	1.5	0.48	126	1.563	1.259	1.778	1.585	1.778	1.413	1.585	1.413	1.778	1.413	1.778
sub3	2015-06-22	47	1.5	0.48	126	1.657	1.259	1.585	1.413	1.778	1.585	1.778	1.585	1.995	1.413	1.585
sub3	2015-06-22	47	1.5	0.48	126	2.115	2.512	3.162	2.512	2.818	2.239	2.512	2.239	2.512	1.413	1.778
sub3	2015-06-22	47	1.5	0.48	126	1.981	2.512	3.162	2.512	2.818	2.512	2.818	1.585	1.778	1.413	1.778
sub3	2015-06-23	47	1.5	0.48	36	2.484	3.981	5.012	3.548	3.981	2.239	2.512	2.239	3.162	2.239	2.512
sub3	2015-06-23	47	1.5	0.48	36	5.432	5.012	7.079	4.467	5.623	5.012	5.623	5.012	5.623	5.012	6.31
sub3	2015-06-23	47	1.5	0.48	36	2.249	3.981	5.012	3.981	4.467	2.239	2.512	1.995	2.512	1.995	2.239
sub3	2015-06-23	47	1.5	0.48	36	2.006	1.585	1.995	1.585	1.778	1.585	1.778	1.413	2.512	2.239	2.512
sub3	2015-06-23	47	1.5	0.48	36	2.799	5.012	6.31	4.467	5.012	3.162	3.548	2.512	2.818	2.239	2.512
sub3	2015-06-23	47	1.5	0.48	126	2.58	3.981	5.012	3.548	3.981	2.818	3.162	2.239	2.512	2.239	2.512
sub3	2015-06-23	47	1.5	0.48	126	2.514	5.012	6.31	5.012	5.623	2.818	3.162	2.512	2.818	1.778	1.995
sub3	2015-06-23	47	1.5	0.48	126	3.355	3.162	4.467	3.981	4.467	3.162	3.548	3.162	3.548	3.162	3.548
sub3	2015-06-23	47	1.5	0.48	126	2.699	2.512	3.548	3.162	3.981	2.818	3.162	2.818	3.162	1.995	2.239
sub3	2015-06-23	47	1.5	0.48	126	1.348	1.259	1.778	0.891	1.259	1.122	1.259	1.122	1.585	1.413	1.585
sub4	2015-06-13	47	1.5	0.48	36	4.165	1.585	2.818	2.512	2.818	2.512	2.818	2.239	5.012	4.467	7.943
sub4	2015-06-13	47	1.5	0.48	36	1.7	1.585	2.512	1.585	1.778	1.585	1.995	1.585	1.778	1.259	1.995
sub4	2015-06-13	47	1.5	0.48	36	1.696	1.585	1.995	1.778	1.995	1.413	1.585	1.413	1.995	1.778	1.995
sub4	2015-06-13	47	1.5	0.48	36	2.821	5.012	6.31	5.623	6.31	3.162	3.548	2.818	3.162	1.995	2.239
sub4	2015-06-13	47	1.5	0.48	36	1.602	7.943	2.512	2.818	2.512	2.818	1.413	1.585	1.122	1.413	1.259
sub4	2015-06-13	47	1.5	0.48	36	3.247	3.162	3.981	2.818	3.548	3.162	3.548	2.512	3.548	3.162	3.548
sub4	2015-06-13	47	1.5	0.48	126	2.482	2.512	3.162	2.239	3.162	2.239	2.512	1.995	2.818	2.512	2.818
sub4	2015-06-13	47	1.5	0.48	126	2.631	3.981	5.012	2.239	2.512	2.239	2.818	2.512	2.818	2.239	3.162
sub4	2015-06-13	47	1.5	0.48	126	2.958	3.981	5.623	3.162	3.548	3.162	3.548	2.818	3.162	2.239	2.818
sub4	2015-06-13	47	1.5	0.48	126	2.612	1.259	1.778	1.259	1.995	1.778	3.162	2.239	2.818	2.512	3.162
sub4	2015-06-13	47	1.5	0.48	126	4.264	3.162	4.467	3.548	5.012	3.981	5.623	3.981	4.467	3.548	3.981
sub4	2015-06-13	47	1.5	0.48	126	3.917	2.512	3.548	2.512	2.818	2.512	4.467	3.981	5.012	3.548	3.981
sub4	2015-06-17	47	1.5	0.48	126	4.105	7.943	5.012	5.623	4.467	5.623	4.467	5.012	3.162	3.548	2.818
sub4	2015-06-17	47	1.5	0.48	126	2.482	3.981	5.012	3.162	3.548	2.239	2.512	1.995	2.818	2.512	2.818
sub4	2015-06-17	47	1.5	0.48	126	1.927	1.259	1.778	1.585	1.995	1.778	1.995	1.778	1.995	1.778	2.239
sub4	2015-06-17	47	1.5	0.48	126	2.235	7.943	6.31	7.079	2.818	3.162	1.995	2.239	1.995	2.239	1.778
sub4	2015-06-17	47	1.5	0.48	126	2.18	1.259	2.512	2.239	2.512	1.585	2.512	2.239	2.512	1.995	2.239
sub4	2015-06-17	47	1.5	0.48	126	2	3.981	5.012	2.512	2.818	2.239	2.818	1.585	1.778	1.585	1.995
sub4	2015-06-17	47	1.5	0.48	126	2.255	3.981	5.012	2.818	3.162	2.818	3.162	1.778	1.995	1.778	1.995
sub4	2015-06-17	47	1.5	0.48	126	1.508	3.981	5.012	1.995	2.239	1.122	1.585	1.259	1.585	1.259	2.239
sub4	2015-06-17	47	1.5	0.48	126	3.999	3.162	3.981	3.548	3.981	3.548	3.981	3.548	4.467	3.981	4.467
sub4	2015-06-17	47	1.5	0.48	126	3.175	7.943	3.162	3.548	2.818	3.162	2.818	3.548	2.512	5.012	1.995
sub4	2015-06-19	47	1.5	0.48	126	3.089	7.943	6.31	7.079	3.162	3.548	3.162	3.981	2.512	2.818	2.512
sub4	2015-06-19	47	1.5	0.48	126	1.671	1.259	1.585	1	1.413	1.259	1.585	1.413	1.995	1.778	1.995
sub4	2015-06-19	47	1.5	0.48	126	2.249	1.585	1.995	1.778	2.239	1.995	2.239	1.995	2.512	2.239	2.512
sub4	2015-06-19	47	1.5	0.48	126	2.371	2.512	3.162	1.585	2.512	1.995	2.239	1.995	2.239	1.778	3.981
sub4	2015-06-19	47	1.5	0.48	126	1.872	3.981	5.012	2.512	2.818	1.778	1.995	1.585	2.512	1.585	1.778
sub4	2015-06-19	47	1.5	0.48	126	2.862	3.981	5.623	4.467	5.012	1.585	2.818	2.512	3.548	3.162	3.548
sub4	2015-06-19	47	1.5	0.48	126	2.264	1.995	2.512	1.995	2.239	1.778	2.239	1.995	2.512	2.239	2.818
sub4	2015-06-19	47	1.5	0.48	126	2.734	2.512	3.162	2.818	3.162	2.512	2.818	2.239	3.162	2.512	3.162
sub4	2015-06-19	47	1.5	0.48	126	2.694	3.162	3.981	3.162	3.548	2.818	3.162	2.512	3.162	1.995	2.512
sub4	2015-06-19	47	1.5	0.48	126	2.566	1.995	2.512	2.239	2.818	2.239	3.162	2.818	3.162	1.778	2.239
sub4	2015-06-20	47	1.5	0.48	126	2.251	1.585	1.995	1.585	1.995	1.585	1.995	1.778	2.818	2.512	2.818
sub4	2015-06-20	47	1.5	0.48	126	2.234	5.012	6.31	2.818	3.162	2.818	3.162	1.995	2.239	1.413	1.778
sub4	2015-06-20	47	1.5	0.48	126	3.176	7.943	3.548	4.467	3.162	3.548	3.162	3.548	2.818	3.162	2.818
sub4	2015-06-20	47	1.5	0.48	126	2.54	2.512	3.162	2.818	3.162	2.818	3.162	2.239	2.512	1.995	2.512
sub4	2015-06-20	47	1.5	0.48	126	2.09	3.162	3.981	2.239	2.512	2.239	2.512	1.778	1.995	1.778	2.239
sub4	2015-06-20	47	1.5	0.48	126	2.348	5.012	6.31	2.818	3.548	3.162	3.981	1.585	1.995	1.585	1.778
sub4	2015-06-20	47	1.5	0.48	126	1.827	1.259	1.778	1.413	1.778	1.585	1.778	1.585	1.995	1.778	2.239
sub4	2015-06-20	47	1.5	0.48	126	2.952	3.162	4.467	3.981	5.012	3.162	3.548	2.512	2.818	2.512	3.162
sub4	2015-06-20	47	1.5	0.48	126	2.463	3.162	4.467	3.981	4.467	2.818	3.162	1.778	2.512	1.995	2.512
sub4	2015-06-20	47	1.5	0.48	126	3.022	5.012	6.31	3.981	4.467	2.818	3.162	2.239	3.548	2.818	3.548
sub4	2015-06-21	47	1.5	0.48	126	2.081	1.259	1.585	1.413	1.995	1.778	2.239	1.995	2.239	1.995	2.239
sub4	2015-06-21	47	1.5	0.48	126	3.319	5.012	7.079	3.162	3.548	3.162	3.548	2.512	3.981	3.162	3.548
sub4	2015-06-21	47	1.5	0.48	126	3.5	5.012	6.31	3.162	3.548	3.162	3.981	3.162	3.981	3.162	3.548
sub4	2015-06-21	47	1.5	0.48	126	2.345	2.512	4.467	2.512	2.818	2.512	2.818	1.995	2.239	1.995	2.512
sub4	2015-06-21	47	1.5	0.48	126	1.022	0.501	0.794	0.631	0.708	0.631	1.122	1	1.122	1	1.259
sub4	2015-06-21	47	1.5	0.48	126	2.757	3.162	3.981	2.239	2.512	1.778	2.512	1.995	3.548	3.162	3.548
sub4	2015-06-21	47	1.5	0.48	126	1.566	3.981	5.012	1.995	2.512	1.259	1.585	1.413	1.778	1.585	1.778
sub4	2015-06-21	47	1.5	0.48	126	1.754	3.162	3.981	3.162	3.548	2.239	2.512	1.585	1.778	1	1.413
sub4	2015-06-21	47	1.5	0.48	126	2.446	1.995	2.512	1.995	2.239	1.778	2.512	2.239	2.818	2.512	2.818
sub4	2015-06-21	47	1.5	0.48	126	2.971	3.162	3.981	2.818	3.162	2.512	3.548	3.162	3.548	2.239	2.818
sub4	2015-06-22	47	1.5	0.48	126	3.709	3.981	5.012	3.548	3.981	3.548	4.467	3.548	3.981	3.162	3.548
sub4	2015-06-22	47	1.5	0.48	126	3.408	5.012	6.31	3.162	3.548	3.162	4.467	3.162	3.981	2.512	3.162
sub4	2015-06-22	47	1.5	0.48	126	2.235	2.512	3.162	2.818	3.162	1.778	2.239	1.995	2.239	1.995	3.162
sub4	2015-06-22	47	1.5	0.48	126	1.951	1	1.413	1.259	1.995	1.259	1.413	1.122	3.162	2.239	2.512
sub4	2015-06-22	47	1.5	0.48	126	2.946	3.981	5.012	3.981	5.012	2.818	3.162	2.818	3.548	2.512	2.818
sub4	2015-06-22	47	1.5	0.48	126	2.264	1.585	1.995	1.778	2.818	2.239	2.818	1.995	2.239	1.778	2.512
sub4	2015-06-22	47	1.5	0.48	126	2.05	3.162	3.981	3.162	3.548	1.778	2.512	1.995	2.239	1.778	1.995
sub4	2015-06-22	47	1.5	0.48	126	2.513	3.981	5.012	2.818	3.548	2.818	3.981	1.995	2.512	1.778	1.995
sub4	2015-06-22	47	1.5	0.48	126	2.257	3.981	5.012	3.981	4.467	2.512	3.162	1.585	1.995	1.778	2.512
sub4	2015-06-22	47	1.5	0.48	126	2.014	0.794	1.413	1.122	1.585	1.259	1.995	1.778	2.239	1.995	2.818
sub4	2015-06-23	47	1.5	0.48	36	4.055	3.981	5.012	4.467	5.012	4.467	5.623	3.548	3.981	3.162	3.548
sub4	2015-06-23	47	1.5	0.48	36	4.823	3.162	3.981	3.548	3.981	3.548	4.467	3.981	5.623	5.012	6.31
sub4	2015-06-23	47	1.5	0.48	36	4.345	2.512	3.162	2.818	3.981	3.548	5.623	3.981	4.467	3.981	4.467
sub4	2015-06-23	47	1.5	0.48	36	3.7	7.943	3.548	3.981	1.995	3.981	3.548	3.981	3.548	3.981	3.162
sub4	2015-06-23	47	1.5	0.48	36	2.331	1.995	3.162	2.818	3.162	2.818	3.162	1.995	2.239	1.778	1.995
sub4	2015-06-23	47	1.5	0.48	126	2.058	3.981	5.623	3.981	5.012	2.239	2.512	1.585	2.239	1.778	1.995
sub4	2015-06-23	47	1.5	0.48	126	2.417	1.585	2.818	1.778	2.239	1.778	2.818	2.512	3.162	1.995	2.239
sub4	2015-06-23	47	1.5	0.48	126	1.927	2.512	3.162	1.585	1.995	1.778	1.995	1.778	1.995	1.778	2.239
sub4	2015-06-23	47	1.5	0.48	126	2.526	2.512	3.162	1.995	2.239	1.778	2.239	1.995	3.162	2.818	3.162
sub4	2015-06-23	47	1.5	0.48	126	1.602	1.995	2.818	2.239	2.512	1.585	1.995	1.413	1.585	1.259	1.778
sub5	2015-06-19	47	1.5	0.48	36	3.7	3.162	3.981	1.995	3.981	3.548	3.981	3.162	3.981	3.548	3.981
sub5	2015-06-19	47	1.5	0.48	36	3.862	5.012	6.31	3.548	3.981	3.162	4.467	3.548	4.467	3.548	3.981
sub5	2015-06-19	47	1.5	0.48	36	3.889	2.512	3.162	2.818	3.548	3.162	4.467	3.981	5.012	3.162	3.548
sub5	2015-06-19	47	1.5	0.48	36	3.451	7.943	3.981	4.467	3.981	4.467	3.162	3.548	2.818	3.548	3.162
sub5	2015-06-19	47	1.5	0.48	36	4.299	7.943	4.467	5.012	3.162	3.981	3.548	5.012	4.467	5.623	3.162
sub5	2015-06-19	47	1.5	0.48	36	4.679	7.943	3.981	4.467	3.981	5.012	4.467	5.623	3.981	5.012	3.981
sub5	2015-06-19	47	1.5	0.48	126	3.538	3.981	6.31	4.467	5.012	3.981	4.467	2.818	3.981	2.818	3.162
sub5	2015-06-19	47	1.5	0.48	126	4.264	3.981	5.623	3.162	4.467	3.981	5.623	3.981	4.467	3.548	3.981
sub5	2015-06-19	47	1.5	0.48	126	5.26	5.012	6.31	5.012	6.31	5.012	5.623	3.981	6.31	5.012	5.623
sub5	2015-06-19	47	1.5	0.48	126	2.741	1.995	3.162	2.818	3.162	2.818	3.548	2.512	2.818	2.239	2.512
sub5	2015-06-19	47	1.5	0.48	126	2.559	3.162	3.981	2.239	3.162	2.818	3.548	2.239	2.512	1.995	2.239
sub5	2015-06-19	47	1.5	0.48	126	3.645	3.162	3.981	3.162	3.548	3.162	3.548	3.162	4.467	3.548	3.981
sub5	2015-06-21	47	1.5	0.48	126	3.37	3.981	5.012	3.548	3.981	3.162	3.548	2.818	3.548	3.162	3.981
sub5	2015-06-21	47	1.5	0.48	126	2.259	1.995	2.512	1.995	2.239	1.995	2.818	1.995	2.239	1.995	2.512
sub5	2015-06-21	47	1.5	0.48	126	1.834	2.512	3.162	2.239	2.512	1.995	2.239	1.778	1.995	1.413	1.585
sub5	2015-06-21	47	1.5	0.48	126	4.371	7.943	5.623	6.31	5.012	5.623	3.162	5.012	3.981	4.467	3.981
sub5	2015-06-21	47	1.5	0.48	126	2.375	3.162	4.467	2.512	3.162	2.239	2.512	2.239	2.512	2.239	2.512
sub5	2015-06-21	47	1.5	0.48	126	4.09	3.981	5.623	4.467	5.012	4.467	5.012	3.548	3.981	3.548	3.981
sub5	2015-06-21	47	1.5	0.48	126	2.785	2.512	3.162	2.818	3.548	2.239	2.818	2.512	3.162	2.818	3.162
sub5	2015-06-21	47	1.5	0.48	126	2.335	7.943	5.623	6.31	3.162	3.548	1.995	2.239	1.995	2.239	1.995
sub5	2015-06-21	47	1.5	0.48	126	3.055	3.162	4.467	3.981	4.467	2.818	3.162	2.818	3.548	2.818	3.162
sub5	2015-06-21	47	1.5	0.48	126	2.425	3.981	5.012	1.995	2.239	1.995	3.162	1.995	2.239	1.995	3.162
sub5	2015-06-22	47	1.5	0.48	126	3.523	7.943	6.31	7.079	3.162	3.548	3.162	3.981	3.162	4.467	2.818
sub5	2015-06-22	47	1.5	0.48	126	2.928	3.981	5.623	3.162	3.548	3.162	3.981	2.512	3.162	2.239	2.512
sub5	2015-06-22	47	1.5	0.48	126	2.741	2.512	3.162	2.818	3.162	2.239	2.818	2.512	3.548	2.512	2.818
sub5	2015-06-22	47	1.5	0.48	126	3.75	3.162	3.981	3.548	4.467	3.981	5.012	3.548	3.981	2.818	3.162
sub5	2015-06-22	47	1.5	0.48	126	3.004	2.512	3.162	2.512	2.818	2.512	3.162	2.818	3.162	2.818	3.548
sub5	2015-06-22	47	1.5	0.48	126	3.125	3.162	3.981	2.818	3.548	2.818	3.162	2.512	3.548	3.162	3.548
sub5	2015-06-22	47	1.5	0.48	126	2.14	1.585	1.995	1.778	2.512	2.239	2.512	1.995	2.512	1.585	1.995
sub5	2015-06-22	47	1.5	0.48	126	2.85	3.981	5.623	2.818	3.162	2.818	3.162	2.818	3.548	2.239	2.512
sub5	2015-06-22	47	1.5	0.48	126	2.017	3.162	5.012	2.512	2.818	1.778	1.995	1.585	2.512	1.995	2.239
sub5	2015-06-22	47	1.5	0.48	126	2.796	3.981	5.012	3.548	3.981	2.818	3.162	2.818	3.162	1.995	2.818
sub5	2015-06-23	47	1.5	0.48	126	2.049	1.259	1.995	1.778	1.995	1.585	2.239	1.995	2.239	1.995	2.239
sub5	2015-06-23	47	1.5	0.48	126	2.569	2.512	3.548	2.818	3.162	2.512	2.818	2.512	2.818	2.239	2.512
sub5	2015-06-23	47	1.5	0.48	126	4.224	5.012	6.31	4.467	5.012	3.981	4.467	3.981	4.467	3.981	4.467
sub5	2015-06-23	47	1.5	0.48	126	2.117	2.512	3.162	2.239	2.512	1.995	2.239	1.995	2.239	1.995	2.239
sub5	2015-06-23	47	1.5	0.48	126	2.004	2.512	3.162	2.512	2.818	1.778	2.239	1.995	2.239	1.778	1.995
sub5	2015-06-23	47	1.5	0.48	126	2.799	3.981	5.012	3.162	3.548	3.162	3.548	2.512	2.818	2.239	2.512
sub5	2015-06-23	47	1.5	0.48	126	2.871	2.512	3.162	2.818	3.162	2.512	2.818	2.512	3.162	2.239	3.981
sub5	2015-06-23	47	1.5	0.48	126	1.877	1.995	2.818	2.239	2.512	1.995	2.239	1.778	1.995	1.259	1.995
sub5	2015-06-23	47	1.5	0.48	126	3.466	3.162	3.981	3.162	3.548	2.818	3.162	2.818	3.981	3.548	4.467
sub5	2015-06-23	47	1.5	0.48	126	2.126	3.162	4.467	3.162	3.548	2.239	2.512	1.995	2.239	1.778	1.995
sub5	2015-06-24	47	1.5	0.48	126	3.176	2.512	3.548	2.512	3.162	2.818	3.162	2.818	3.548	3.162	3.548
sub5	2015-06-24	47	1.5	0.48	126	3.038	2.512	3.162	2.512	2.818	1.995	2.239	1.995	3.981	3.548	4.467
sub5	2015-06-24	47	1.5	0.48	126	3.089	5.012	6.31	3.548	3.981	3.548	3.981	2.512	2.818	2.512	3.162
sub5	2015-06-24	47	1.5	0.48	126	2.648	3.162	3.981	2.818	3.981	2.818	3.162	2.512	3.162	1.995	2.239
sub5	2015-06-24	47	1.5	0.48	126	3.355	3.162	3.981	3.162	3.548	3.162	3.548	3.162	3.548	3.162	3.548
sub5	2015-06-24	47	1.5	0.48	126	2.335	1.995	2.512	2.239	3.162	2.239	2.512	1.995	2.512	2.239	2.512
sub5	2015-06-24	47	1.5	0.48	126	2.212	1.995	2.512	1.778	1.995	1.778	2.239	1.995	2.512	2.239	2.512
sub5	2015-06-24	47	1.5	0.48	126	1.927	3.162	3.981	1.778	1.995	1.778	1.995	1.778	1.995	1.778	2.239
sub5	2015-06-24	47	1.5	0.48	126	2.54	3.162	3.981	2.239	3.162	2.818	3.162	1.995	2.512	2.239	2.512
sub5	2015-06-24	47	1.5	0.48	126	1.17	1.259	1.995	1.585	1.995	1	1.259	1.122	1.259	1.122	1.259
sub5	2015-06-25	47	1.5	0.48	126	2.05	3.981	5.012	4.467	5.012	2.239	2.512	1.778	1.995	1.778	1.995
sub5	2015-06-25	47	1.5	0.48	126	2.02	1.995	2.512	1.995	2.239	1.995	2.239	1.995	2.239	1.413	2.239
sub5	2015-06-25	47	1.5	0.48	126	1.831	1.259	1.778	1.585	1.778	1.585	1.995	1.585	1.995	1.585	2.239
sub5	2015-06-25	47	1.5	0.48	126	1.414	1	1.585	1.413	1.995	1.585	1.778	1.413	1.585	1	1.122
sub5	2015-06-25	47	1.5	0.48	126	1.895	1.585	1.995	1.778	1.995	1.585	1.995	1.778	2.239	1.778	1.995
sub5	2015-06-25	47	1.5	0.48	126	1.473	2.512	3.162	2.512	2.818	1.259	1.585	1.413	1.585	1.413	1.585
sub5	2015-06-25	47	1.5	0.48	126	1.448	1.585	1.995	1.585	1.995	1.778	1.995	1.122	1.259	1.122	1.413
sub5	2015-06-25	47	1.5	0.48	126	2.004	3.162	4.467	2.239	2.512	1.995	2.239	1.778	1.995	1.778	2.239
sub5	2015-06-25	47	1.5	0.48	126	1.834	1.995	2.512	1.778	2.239	1.585	1.995	1.413	2.239	1.778	1.995
sub5	2015-06-25	47	1.5	0.48	126	2.831	2.512	3.162	2.512	2.818	2.512	2.818	2.512	3.162	2.818	3.162
sub5	2015-06-26	47	1.5	0.48	36	2.494	3.981	5.012	3.548	3.981	2.818	3.162	2.239	2.512	1.995	2.239
sub5	2015-06-26	47	1.5	0.48	36	2.741	3.162	3.981	3.162	3.548	2.512	2.818	2.239	3.548	2.512	2.818
sub5	2015-06-26	47	1.5	0.48	36	1.855	3.981	5.012	3.162	3.548	1.778	1.995	1.585	1.995	1.778	1.995
sub5	2015-06-26	47	1.5	0.48	36	2.081	3.981	5.012	2.239	3.162	1.778	2.239	1.995	2.239	1.995	2.239
sub5	2015-06-26	47	1.5	0.48	36	3.176	2.512	3.548	2.239	3.162	2.818	3.548	3.162	3.548	2.818	3.162
sub5	2015-06-26	47	1.5	0.48	126	1.931	5.012	6.31	3.162	3.548	1.995	2.239	1.585	1.995	1.778	1.995
sub5	2015-06-26	47	1.5	0.48	126	2.02	7.943	4.467	5.012	2.818	3.162	1.778	1.995	1.778	1.995	1.413
sub5	2015-06-26	47	1.5	0.48	126	3.197	1.995	2.512	2.239	3.548	3.162	3.548	3.162	3.981	2.512	2.818
sub5	2015-06-26	47	1.5	0.48	126	2.421	3.162	4.467	2.512	2.818	1.995	2.239	1.995	2.512	2.239	3.548
sub5	2015-06-26	47	1.5	0.48	126	2.212	3.981	5.012	1.995	2.239	1.995	2.239	1.778	2.512	2.239	2.512
sub6	2015-06-18	47	1.5	0.48	36	3.805	3.162	4.467	2.818	3.162	2.818	3.981	3.548	4.467	3.548	4.467
sub6	2015-06-18	47	1.5	0.48	36	3.846	5.012	7.079	5.012	5.623	3.548	4.467	3.548	3.981	3.548	3.981
sub6	2015-06-18	47	1.5	0.48	36	3.831	3.981	5.012	4.467	5.012	4.467	5.012	3.162	5.012	2.512	2.818
sub6	2015-06-18	47	1.5	0.48	36	5.318	5.012	7.943	5.623	6.31	5.012	5.623	5.012	5.623	5.012	5.623
sub6	2015-06-18	47	1.5	0.48	36	5.456	3.981	5.012	4.467	5.623	5.012	5.623	5.012	6.31	4.467	6.31
sub6	2015-06-18	47	1.5	0.48	36	5.277	7.943	5.623	7.943	6.31	7.079	5.012	5.623	4.467	5.012	4.467
sub6	2015-06-18	47	1.5	0.48	126	3.605	7.943	6.31	7.943	6.31	7.079	2.512	2.818	2.512	3.548	3.162
sub6	2015-06-18	47	1.5	0.48	126	4.516	5.012	6.31	4.467	5.012	4.467	5.623	3.981	4.467	3.548	5.012
sub6	2015-06-18	47	1.5	0.48	126	3.846	10	3.162	4.467	3.981	4.467	3.548	3.981	3.548	3.981	3.548
sub6	2015-06-18	47	1.5	0.48	126	3.643	5.012	6.31	4.467	5.012	2.818	3.981	3.548	3.981	3.548	3.981
sub6	2015-06-18	47	1.5	0.48	126	4.726	5.012	6.31	3.548	3.981	3.162	5.623	4.467	5.623	4.467	5.012
sub6	2015-06-18	47	1.5	0.48	126	4.121	3.981	5.012	4.467	5.012	3.981	5.012	2.818	4.467	3.981	4.467
sub6	2015-06-19	47	1.5	0.48	36	4.261	3.162	5.012	3.981	4.467	3.548	3.981	3.548	5.012	4.467	5.012
sub6	2015-06-19	47	1.5	0.48	36	4.243	3.162	3.981	3.548	5.012	3.981	5.012	3.548	4.467	3.981	4.467
sub6	2015-06-19	47	1.5	0.48	36	4.986	7.943	5.623	6.31	5.623	6.31	5.012	5.623	3.981	5.012	3.981
sub6	2015-06-19	47	1.5	0.48	36	3.69	3.162	4.467	3.981	4.467	3.981	4.467	3.548	4.467	2.512	3.162
sub6	2015-06-19	47	1.5	0.48	36	3.055	3.162	3.981	3.162	3.981	2.818	3.162	2.818	3.548	2.818	3.162
sub6	2015-06-19	47	1.5	0.48	36	2.895	3.162	4.467	3.162	3.548	3.162	3.548	2.512	2.818	2.512	2.818
sub6	2015-06-19	47	1.5	0.48	36	2.172	3.981	5.012	4.467	5.012	1.995	2.239	1.778	2.512	1.995	2.512
sub6	2015-06-19	47	1.5	0.48	36	3.672	3.162	3.981	3.548	3.981	3.548	3.981	3.548	5.623	2.512	2.818
sub6	2015-06-19	47	1.5	0.48	36	4.781	5.012	6.31	3.981	5.623	5.012	5.623	3.981	4.467	3.981	5.623
sub6	2015-06-19	47	1.5	0.48	36	3.151	2.512	3.162	2.818	3.981	2.239	3.981	1.995	3.548	3.162	3.981
sub6	2015-06-20	47	1.5	0.48	36	4.024	2.512	3.162	2.818	3.162	2.239	4.467	3.981	4.467	3.981	5.012
sub6	2015-06-20	47	1.5	0.48	36	3.492	3.981	5.012	4.467	5.012	3.981	5.012	2.818	3.162	2.818	3.162
sub6	2015-06-20	47	1.5	0.48	36	3.302	1.995	3.981	3.162	3.981	3.548	3.981	3.548	3.981	2.239	2.512
sub6	2015-06-20	47	1.5	0.48	36	2.895	3.981	5.012	4.467	5.623	2.818	3.548	2.512	3.162	2.512	2.818
sub6	2015-06-20	47	1.5	0.48	36	4.178	5.012	6.31	4.467	5.012	3.981	5.012	3.162	4.467	3.981	4.467
sub6	2015-06-20	47	1.5	0.48	36	2.753	3.162	3.981	3.162	3.981	3.162	3.548	2.239	2.512	2.239	2.818
sub6	2015-06-20	47	1.5	0.48	36	3.568	3.162	3.981	3.162	5.012	2.512	3.162	2.818	4.467	3.981	4.467
sub6	2015-06-20	47	1.5	0.48	36	2.386	2.512	3.981	2.512	2.818	2.239	2.512	2.239	2.512	1.995	2.818
sub6	2015-06-20	47	1.5	0.48	36	3.112	3.162	3.981	3.162	3.548	3.162	3.548	2.818	3.162	2.818	3.162
sub6	2015-06-20	47	1.5	0.48	36	3.587	3.162	3.981	3.162	3.548	3.162	3.548	2.818	3.981	3.548	4.467
sub6	2015-06-21	47	1.5	0.48	36	4.03	1.585	3.162	2.818	3.548	2.818	4.467	3.981	4.467	3.981	4.467
sub6	2015-06-21	47	1.5	0.48	36	2.844	3.162	3.981	2.818	3.162	2.512	2.818	2.512	3.162	2.512	3.548
sub6	2015-06-21	47	1.5	0.48	36	1.773	1.995	2.512	2.239	2.818	2.239	2.818	1.413	1.585	1	1.585
sub6	2015-06-21	47	1.5	0.48	36	2.882	3.981	5.012	2.818	3.162	2.818	3.162	2.818	3.162	2.512	2.818
sub6	2015-06-21	47	1.5	0.48	36	2.62	2.512	3.162	2.818	3.548	2.512	2.818	2.512	2.818	2.239	2.818
sub6	2015-06-21	47	1.5	0.48	36	2.437	1.995	2.512	2.239	2.818	1.995	2.818	2.239	2.512	2.239	2.818
sub6	2015-06-21	47	1.5	0.48	36	3.306	1.995	3.162	2.818	3.548	3.162	3.981	3.162	3.548	2.818	3.162
sub6	2015-06-21	47	1.5	0.48	36	2.696	1.995	2.512	2.239	2.512	2.239	2.818	2.512	2.818	2.239	3.548
sub6	2015-06-21	47	1.5	0.48	36	3.355	3.981	5.012	2.818	3.548	3.162	3.548	3.162	3.548	3.162	3.548
sub6	2015-06-21	47	1.5	0.48	36	1.757	2.512	3.548	2.239	3.162	1.995	2.239	1.122	1.778	1.413	1.995
sub6	2015-06-22	47	1.5	0.48	36	2.04	3.162	4.467	2.239	2.512	1.259	2.239	1.995	2.512	1.995	2.239
sub6	2015-06-22	47	1.5	0.48	36	3.176	2.512	3.162	2.818	3.162	2.818	3.162	2.818	3.548	3.162	3.548
sub6	2015-06-22	47	1.5	0.48	36	1.628	1	1.995	1.413	1.585	1.413	1.585	1.413	1.778	1.585	1.995
sub6	2015-06-22	47	1.5	0.48	36	2	2.512	3.548	2.818	3.162	1.585	1.778	1.585	2.818	1.995	2.239
sub6	2015-06-22	47	1.5	0.48	36	2.499	2.512	3.162	1.585	2.239	1.995	2.512	1.995	2.818	2.512	3.162
sub6	2015-06-22	47	1.5	0.48	36	3.427	1.995	3.162	2.818	3.548	3.162	3.548	3.162	3.548	3.162	3.981
sub6	2015-06-22	47	1.5	0.48	36	1.729	3.162	3.981	2.512	3.162	1.778	1.995	1.413	1.995	1.413	1.778
sub6	2015-06-22	47	1.5	0.48	36	3.515	3.981	5.012	4.467	5.012	3.548	4.467	3.162	3.548	2.818	3.548
sub6	2015-06-22	47	1.5	0.48	36	2.396	1.995	2.818	1.995	2.512	1.995	2.239	1.995	2.818	2.512	2.818
sub6	2015-06-22	47	1.5	0.48	36	1.689	1.259	1.585	1.413	1.585	1.413	2.239	1.778	1.995	1.122	1.585
sub6	2015-06-23	47	1.5	0.48	36	2.231	2.512	3.162	2.512	2.818	2.512	2.818	1.585	2.239	1.995	2.239
sub6	2015-06-23	47	1.5	0.48	36	2.372	2.512	3.548	1.778	1.995	1.778	2.239	1.995	2.818	2.239	3.162
sub6	2015-06-23	47	1.5	0.48	36	4.071	3.981	5.012	3.981	4.467	3.981	4.467	3.981	4.467	3.548	3.981
sub6	2015-06-23	47	1.5	0.48	36	3.587	3.162	3.981	3.548	3.981	3.548	4.467	3.981	4.467	2.239	2.818
sub6	2015-06-23	47	1.5	0.48	36	2.004	1.585	2.239	1.585	2.239	1.778	2.239	1.995	2.239	1.778	1.995
sub6	2015-06-23	47	1.5	0.48	36	2.126	1.995	2.818	1.413	1.995	1.778	2.239	1.995	2.512	1.995	2.239
sub6	2015-06-23	47	1.5	0.48	36	2.212	3.981	5.012	2.512	2.818	2.239	2.512	1.995	2.239	1.778	2.512
sub6	2015-06-23	47	1.5	0.48	36	3.248	5.012	6.31	3.548	3.981	3.548	3.981	2.818	3.162	2.818	3.162
sub6	2015-06-23	47	1.5	0.48	36	2.523	1.995	2.512	1.995	2.512	2.239	2.818	2.512	2.818	2.239	2.512
sub6	2015-06-23	47	1.5	0.48	36	2.177	7.943	3.981	4.467	2.512	2.818	1.995	2.239	1.778	2.239	1.995
sub6	2015-06-24	47	1.5	0.48	36	2.665	3.162	3.981	2.512	2.818	2.512	2.818	2.512	2.818	2.512	2.818
sub6	2015-06-24	47	1.5	0.48	36	2.022	3.162	4.467	2.818	3.162	2.239	2.512	1.778	2.239	1.585	1.778
sub6	2015-06-24	47	1.5	0.48	36	1.83	1.585	1.995	1.778	2.512	1.259	1.413	1.259	2.239	1.995	2.818
sub6	2015-06-24	47	1.5	0.48	36	2.212	1.259	1.585	1.259	1.585	1.259	2.512	2.239	2.512	2.239	2.512
sub6	2015-06-24	47	1.5	0.48	36	1.428	1.585	1.995	1.778	2.512	1.122	1.413	1.259	1.585	1.413	1.778
sub6	2015-06-24	47	1.5	0.48	126	3.999	5.012	6.31	5.012	5.623	3.981	4.467	3.548	3.981	3.548	4.467
sub6	2015-06-24	47	1.5	0.48	126	3.507	5.012	6.31	3.981	4.467	3.548	3.981	3.548	3.981	2.818	3.162
sub6	2015-06-24	47	1.5	0.48	126	2.472	5.012	6.31	2.512	2.818	2.512	2.818	2.239	2.512	2.239	2.512
sub6	2015-06-24	47	1.5	0.48	126	2.289	7.943	4.467	5.012	2.512	2.818	2.239	2.512	1.413	2.512	2.239
sub7	2015-06-29	47	1.5	0.48	36	2.677	3.981	5.012	3.981	5.012	2.818	3.162	2.512	2.818	2.239	2.512
sub7	2015-06-29	47	1.5	0.48	36	4.516	5.012	6.31	3.548	3.981	3.548	5.012	4.467	5.623	3.981	4.467
sub7	2015-06-29	47	1.5	0.48	36	5.777	3.162	3.981	2.512	5.623	5.012	5.623	5.012	7.079	5.623	6.31
sub7	2015-06-29	47	1.5	0.48	36	5.366	3.162	5.623	5.012	5.623	5.012	6.31	5.623	7.079	3.162	5.012
sub7	2015-06-29	47	1.5	0.48	36	2.958	2.512	3.162	2.239	3.162	2.818	3.162	2.239	3.548	2.818	3.162
sub7	2015-06-29	47	1.5	0.48	36	3.06	7.943	3.548	3.981	3.548	3.981	3.162	3.548	2.512	3.162	1.995
sub7	2015-06-29	47	1.5	0.48	126	4.586	5.012	6.31	4.467	5.012	4.467	5.012	3.548	5.012	4.467	5.012
sub7	2015-06-29	47	1.5	0.48	126	5.25	3.981	5.012	4.467	5.012	4.467	5.623	4.467	6.31	5.012	5.623
sub7	2015-06-29	47	1.5	0.48	126	4.299	3.981	5.012	3.981	6.31	5.012	5.623	3.981	4.467	3.162	3.548
sub7	2015-06-29	47	1.5	0.48	126	3.394	5.012	6.31	5.012	6.31	3.548	4.467	2.818	3.548	2.818	3.162
sub7	2015-06-29	47	1.5	0.48	126	4.35	5.012	6.31	5.623	7.079	4.467	5.012	4.467	5.012	3.162	3.981
sub7	2015-06-29	47	1.5	0.48	126	3.523	10	3.548	3.981	2.818	4.467	3.162	3.981	3.162	3.548	2.818
sub7	2015-07-01	47	1.5	0.48	36	1.798	1.585	1.995	1.585	1.995	1.778	1.995	1.585	2.239	1.413	1.778
sub7	2015-07-01	47	1.5	0.48	36	1.416	1.995	2.512	1.413	1.585	1.413	1.585	1.122	1.259	1.122	1.995
sub7	2015-07-01	47	1.5	0.48	36	2.563	3.981	5.012	3.162	3.548	2.512	3.548	1.995	2.818	1.995	2.512
sub7	2015-07-01	47	1.5	0.48	36	2.711	3.162	3.981	3.162	3.548	2.818	3.548	3.162	3.548	1.413	1.778
sub7	2015-07-01	47	1.5	0.48	36	2.895	3.162	3.981	2.818	3.162	2.512	2.818	2.512	3.548	2.818	3.162
sub7	2015-07-01	47	1.5	0.48	36	1.475	2.512	3.162	1.585	1.778	1.585	1.778	1.585	1.778	1	1.122
sub7	2015-07-01	47	1.5	0.48	36	3.402	3.162	4.467	2.818	3.162	2.818	3.162	2.818	3.981	3.162	4.467
sub7	2015-07-01	47	1.5	0.48	36	1.714	1.585	1.995	1.778	2.239	1.995	2.818	1.585	1.995	0.891	1
sub7	2015-07-01	47	1.5	0.48	36	1.904	3.981	5.012	4.467	5.012	1.778	2.512	2.239	2.512	1.122	1.259
sub7	2015-07-01	47	1.5	0.48	36	2.376	1.995	2.818	2.512	3.548	3.162	3.548	1.778	1.995	1.778	1.995
sub7	2015-07-02	47	1.5	0.48	36	1.826	7.943	4.467	5.012	3.162	3.548	1.413	1.585	1.413	1.585	1.413
sub7	2015-07-02	47	1.5	0.48	36	1.895	7.943	2.239	2.512	1.778	1.995	1.778	2.239	1.995	2.239	1.122
sub7	2015-07-02	47	1.5	0.48	36	1.675	7.943	3.548	5.012	1.585	1.778	1.413	2.239	1.585	1.778	1.259
sub7	2015-07-02	47	1.5	0.48	36	1.628	3.162	3.981	1.778	1.995	1	1.995	1.585	1.778	1.413	1.995
sub7	2015-07-02	47	1.5	0.48	36	1.765	3.162	3.981	2.818	3.162	2.239	2.512	1.413	1.585	1.259	1.585
sub7	2015-07-02	47	1.5	0.48	36	1.307	1.995	2.818	1.995	2.818	1.778	1.995	1.122	1.259	0.794	0.891
sub7	2015-07-02	47	1.5	0.48	36	0.734	1.585	1.995	0.891	1.122	0.708	1	0.562	0.708	0.631	0.794
sub7	2015-07-02	47	1.5	0.48	36	2.101	3.162	3.981	2.512	2.818	2.239	2.818	1.778	1.995	1.778	1.995
sub7	2015-07-02	47	1.5	0.48	36	1.616	3.162	3.981	2.239	2.512	2.239	2.818	1.122	1.259	1	1.259
sub7	2015-07-02	47	1.5	0.48	36	0.863	1.585	1.995	1.585	1.778	0.891	1	0.794	0.891	0.708	0.891
sub7	2015-07-03	47	1.5	0.48	36	2.831	5.012	6.31	2.818	3.162	2.818	3.162	2.512	3.162	2.512	2.818
sub7	2015-07-03	47	1.5	0.48	36	2.571	2.512	3.162	2.818	3.162	2.512	3.162	2.818	3.162	1.778	1.995
sub7	2015-07-03	47	1.5	0.48	36	1.971	2.512	3.981	1.585	1.778	1.413	1.778	1.585	2.239	1.995	2.818
sub7	2015-07-03	47	1.5	0.48	36	1.483	1.259	1.995	1.778	1.995	1.413	1.585	1.413	1.778	1.122	1.585
sub7	2015-07-03	47	1.5	0.48	36	1.973	5.012	6.31	5.623	6.31	1.778	1.995	1.778	2.512	1.778	1.995
sub7	2015-07-03	47	1.5	0.48	36	0.885	2.512	3.162	1.585	1.995	1	1.122	0.794	0.891	0.708	0.794
sub7	2015-07-03	47	1.5	0.48	36	1.913	1.995	2.818	2.239	2.512	2.239	2.512	1.585	1.778	1.585	1.778
sub7	2015-07-03	47	1.5	0.48	36	2.49	3.162	3.981	3.548	3.981	3.162	3.981	2.512	3.162	1	1.122
sub7	2015-07-03	47	1.5	0.48	36	2.05	3.162	3.981	3.548	3.981	1.778	1.995	1.778	2.512	1.995	2.239
sub7	2015-07-03	47	1.5	0.48	36	1.58	1.585	2.239	1.778	1.995	1.585	1.778	1.122	1.585	1.413	1.995
sub7	2015-07-04	47	1.5	0.48	36	1.496	1.585	1.995	1.585	1.995	1.413	2.512	1.259	1.413	1.122	1.259
sub7	2015-07-04	47	1.5	0.48	36	0.732	0.316	0.501	0.398	0.447	0.398	0.501	0.355	1.122	0.891	1.122
sub7	2015-07-04	47	1.5	0.48	36	1.408	2.512	3.162	1.995	2.512	2.239	2.818	1	1.122	0.562	0.708
sub7	2015-07-04	47	1.5	0.48	36	3.355	3.162	3.981	3.162	3.548	3.162	3.548	3.162	3.548	3.162	3.548
sub7	2015-07-04	47	1.5	0.48	36	0.854	1	1.413	1.122	1.259	1	1.122	0.708	0.794	0.708	0.794
sub7	2015-07-04	47	1.5	0.48	36	1.592	1	1.413	1.259	1.585	1.413	1.585	1.413	1.778	1.585	1.778
sub7	2015-07-04	47	1.5	0.48	36	1.809	3.162	3.981	3.162	3.548	1.995	2.239	1.778	1.995	1.259	1.585
sub7	2015-07-04	47	1.5	0.48	36	0.992	1	1.259	1	1.122	1	1.259	1	1.122	0.447	1.122
sub7	2015-07-04	47	1.5	0.48	36	2.885	3.162	3.981	3.162	3.548	2.818	3.548	3.162	3.548	1.995	2.239
sub7	2015-07-04	47	1.5	0.48	36	3.265	3.981	5.012	3.981	4.467	3.162	4.467	2.818	3.162	2.818	3.162
sub7	2015-07-06	47	1.5	0.48	36	2.049	3.981	5.623	2.239	3.162	2.512	2.818	1.778	1.995	1.413	1.778
sub7	2015-07-06	47	1.5	0.48	36	1.023	2.512	3.162	1.259	1.585	1	1.122	1	1.122	0.891	1
sub7	2015-07-06	47	1.5	0.48	36	2.101	5.012	6.31	1.585	1.995	1.778	2.818	1.995	2.239	1.778	1.995
sub7	2015-07-06	47	1.5	0.48	36	1.972	3.162	3.981	2.818	3.162	1.995	2.239	1.778	1.995	1.585	2.239
sub7	2015-07-06	47	1.5	0.48	36	1.17	1.995	2.512	1	1.122	1	1.259	1.122	1.259	1.122	1.259
sub7	2015-07-06	47	1.5	0.48	36	1.181	1.585	1.995	1.585	1.778	1.259	1.585	1	1.122	1	1.122
sub7	2015-07-06	47	1.5	0.48	36	2.249	3.162	4.467	3.162	3.548	2.239	2.512	1.995	2.512	1.995	2.239
sub7	2015-07-06	47	1.5	0.48	36	1.766	3.162	5.012	1.995	2.239	1.995	2.239	1.585	1.778	1.413	1.585
sub7	2015-07-06	47	1.5	0.48	36	1.1	1.995	2.818	2.512	2.818	1.122	1.413	1.122	1.259	0.794	0.891
sub7	2015-07-06	47	1.5	0.48	36	1.958	1.259	1.585	1.122	1.259	1.122	1.778	1.585	2.512	2.239	2.512
sub7	2015-07-07	47	1.5	0.48	36	0.915	0.794	1.122	0.891	1.413	0.708	1	0.891	1	0.891	1
sub7	2015-07-07	47	1.5	0.48	36	2.696	2.512	3.162	2.512	3.162	2.818	3.548	2.239	2.818	2.239	2.512
sub7	2015-07-07	47	1.5	0.48	36	2.09	1.995	2.512	2.239	3.162	2.512	2.818	1.778	2.239	1.413	1.778
sub7	2015-07-07	47	1.5	0.48	36	2.335	3.162	3.981	1.585	2.512	2.239	2.512	1.995	2.512	2.239	2.512
sub7	2015-07-07	47	1.5	0.48	36	1.311	1.585	1.995	1.585	1.778	1.585	1.778	1.122	1.259	1	1.122
sub7	2015-07-07	47	1.5	0.48	126	3.871	10	6.31	7.079	4.467	5.012	3.981	5.012	2.512	3.548	3.162
sub7	2015-07-07	47	1.5	0.48	126	2.14	7.943	3.981	4.467	3.548	3.981	1.995	2.239	1.585	1.778	1.259
sub7	2015-07-07	47	1.5	0.48	126	5.686	5.012	6.31	5.623	6.31	4.467	5.623	5.012	6.31	5.623	7.079
sub7	2015-07-07	47	1.5	0.48	126	2.085	3.981	5.623	3.981	4.467	2.512	2.818	1.413	1.995	1.778	1.995
sub7	2015-07-07	47	1.5	0.48	126	4.607	3.162	4.467	3.548	4.467	3.981	5.623	3.548	5.012	4.467	5.012
sub8	2015-07-06	47	1.5	0.48	36	4.248	5.012	7.079	3.548	4.467	3.162	3.981	3.548	5.623	3.548	5.623
sub8	2015-07-06	47	1.5	0.48	36	2.717	1.995	2.818	2.239	2.512	2.239	2.512	2.239	2.818	2.512	3.981
sub8	2015-07-06	47	1.5	0.48	36	2.494	1.995	2.818	2.512	3.162	2.239	2.818	1.995	2.512	2.239	3.162
sub8	2015-07-06	47	1.5	0.48	36	4.522	5.012	6.31	4.467	5.012	3.162	5.012	4.467	5.012	4.467	5.012
sub8	2015-07-06	47	1.5	0.48	36	2.702	3.162	3.981	3.548	3.981	3.162	3.548	2.239	2.512	2.239	2.512
sub8	2015-07-06	47	1.5	0.48	36	4.197	3.981	6.31	4.467	5.012	3.981	5.012	4.467	5.012	3.162	3.548
sub8	2015-07-06	47	1.5	0.48	36	1.972	1.995	2.512	2.239	2.512	1.995	2.239	1.585	1.995	1.778	2.239
sub8	2015-07-06	47	1.5	0.48	126	4.178	3.162	5.012	4.467	5.012	3.981	4.467	3.981	5.012	3.162	4.467
sub8	2015-07-06	47	1.5	0.48	126	6.337	5.012	7.943	5.012	7.943	5.623	6.31	5.623	7.079	6.31	7.079
sub8	2015-07-06	47	1.5	0.48	126	4.535	5.012	6.31	5.012	5.623	5.012	5.623	3.548	4.467	3.548	5.012
sub8	2015-07-06	47	1.5	0.48	126	5.112	10	5.012	7.079	5.623	6.31	5.623	6.31	3.981	4.467	3.981
sub8	2015-07-06	47	1.5	0.48	126	5.535	3.981	5.012	3.981	5.012	4.467	5.012	4.467	6.31	5.012	7.943
sub8	2015-07-06	47	1.5	0.48	126	4.191	2.512	3.981	3.162	4.467	3.981	4.467	3.548	3.981	3.548	5.623
sub8	2015-07-06	47	1.5	0.48	126	3.262	1.585	2.239	1.585	3.981	3.548	3.981	2.818	3.162	2.512	3.548
sub8	2015-07-08	47	1.5	0.48	126	3.645	5.012	6.31	4.467	5.012	3.162	3.548	3.162	3.981	3.548	4.467
sub8	2015-07-08	47	1.5	0.48	126	3.826	7.943	3.548	4.467	3.548	3.981	2.512	4.467	3.548	4.467	3.981
sub8	2015-07-08	47	1.5	0.48	126	4.76	3.981	5.012	4.467	5.012	3.981	5.623	4.467	5.012	4.467	5.012
sub8	2015-07-08	47	1.5	0.48	126	3.329	3.981	5.012	3.162	3.981	3.548	4.467	2.818	3.162	2.818	3.162
sub8	2015-07-08	47	1.5	0.48	126	2.958	3.981	5.012	2.512	2.818	2.239	3.548	2.818	3.162	2.818	3.162
sub8	2015-07-08	47	1.5	0.48	126	3.49	3.981	5.012	3.981	5.012	4.467	5.012	2.512	3.162	2.239	3.548
sub8	2015-07-08	47	1.5	0.48	126	4.781	3.981	5.012	4.467	5.623	3.981	4.467	3.981	5.623	5.012	5.623
sub8	2015-07-08	47	1.5	0.48	126	3.781	3.981	5.012	3.981	5.012	3.981	4.467	3.548	3.981	3.162	3.548
sub8	2015-07-08	47	1.5	0.48	126	3.717	3.162	5.623	3.981	4.467	3.548	3.981	3.162	3.981	3.162	4.467
sub8	2015-07-08	47	1.5	0.48	126	1.797	2.512	3.548	2.818	3.162	1.778	2.818	1.413	1.585	1.413	1.778
sub8	2015-07-09	47	1.5	0.48	126	4.498	3.981	5.012	3.981	5.012	4.467	5.623	3.981	4.467	3.981	4.467
sub8	2015-07-09	47	1.5	0.48	126	2.667	2.512	3.162	2.818	3.162	2.818	3.162	1.778	1.995	1.778	4.467
sub8	2015-07-09	47	1.5	0.48	126	4.278	3.162	5.012	4.467	5.012	4.467	5.012	4.467	5.012	3.162	3.548
sub8	2015-07-09	47	1.5	0.48	126	2.484	3.162	3.981	3.162	3.981	2.239	2.512	2.239	2.512	2.239	3.162
sub8	2015-07-09	47	1.5	0.48	126	2.523	2.512	3.548	3.162	3.981	2.512	2.818	2.239	2.512	2.239	2.818
sub8	2015-07-09	47	1.5	0.48	126	1.628	1	1.259	1.122	1.585	1.413	1.585	1.413	1.778	1.585	1.995
sub8	2015-07-09	47	1.5	0.48	126	2.511	3.162	3.981	2.818	3.548	1.995	2.239	1.995	3.162	2.512	3.162
sub8	2015-07-09	47	1.5	0.48	126	3.302	3.162	3.981	3.548	3.981	3.548	3.981	3.548	3.981	2.239	2.512
sub8	2015-07-09	47	1.5	0.48	126	4.17	3.981	5.012	4.467	5.012	4.467	5.012	3.548	4.467	3.548	3.981
sub8	2015-07-09	47	1.5	0.48	126	3.355	5.012	6.31	4.467	5.012	3.162	3.548	3.162	3.548	3.162	3.548
sub8	2015-07-10	47	1.5	0.48	126	4.087	7.943	3.162	3.548	2.818	4.467	3.981	4.467	3.981	4.467	3.162
sub8	2015-07-10	47	1.5	0.48	126	3.407	3.162	3.981	3.548	3.981	3.548	4.467	2.512	3.548	2.818	3.548
sub8	2015-07-10	47	1.5	0.48	126	3.82	2.512	3.162	2.239	2.512	2.239	3.981	3.548	3.981	3.548	5.623
sub8	2015-07-10	47	1.5	0.48	126	4.09	2.512	3.162	2.818	5.012	4.467	5.012	3.548	3.981	3.548	3.981
sub8	2015-07-10	47	1.5	0.48	126	3.805	3.981	5.623	3.548	3.981	3.548	4.467	3.981	4.467	2.818	3.548
sub8	2015-07-10	47	1.5	0.48	126	2.335	2.512	3.548	1.995	2.239	1.995	2.512	2.239	2.512	2.239	2.512
sub8	2015-07-10	47	1.5	0.48	126	3.123	5.012	7.079	6.31	7.079	3.981	4.467	1.413	2.818	2.512	3.548
sub8	2015-07-10	47	1.5	0.48	126	3.921	3.162	4.467	3.981	4.467	3.981	5.012	4.467	5.012	2.239	2.818
sub8	2015-07-10	47	1.5	0.48	126	2.475	3.162	3.981	3.548	3.981	2.239	3.162	2.512	3.162	1.778	1.995
sub8	2015-07-10	47	1.5	0.48	126	1.855	3.162	3.981	2.239	3.162	1.585	1.995	1.778	1.995	1.778	1.995
sub8	2015-07-11	47	1.5	0.48	126	4.071	3.162	3.981	3.548	4.467	3.981	4.467	3.981	4.467	3.548	3.981
sub8	2015-07-11	47	1.5	0.48	126	3.781	3.162	6.31	3.548	3.981	3.548	3.981	3.162	3.981	3.548	4.467
sub8	2015-07-11	47	1.5	0.48	126	2.494	2.512	3.981	2.818	3.548	3.162	3.548	1.995	2.239	1.778	2.239
sub8	2015-07-11	47	1.5	0.48	126	2.163	1.995	2.512	2.239	2.512	1.995	2.512	1.995	2.239	1.995	2.239
sub8	2015-07-11	47	1.5	0.48	126	2.258	1.995	2.512	2.239	2.512	1.778	2.512	1.995	2.512	2.239	2.512
sub8	2015-07-11	47	1.5	0.48	126	3.326	2.512	3.162	2.818	3.981	3.548	3.981	2.512	3.548	2.818	3.548
sub8	2015-07-11	47	1.5	0.48	126	1.444	1.259	1.585	1.413	1.585	1.413	1.585	1.413	1.585	1.259	1.413
sub8	2015-07-11	47	1.5	0.48	126	2.741	3.162	3.981	2.512	2.818	2.512	2.818	2.512	2.818	2.239	3.548
sub8	2015-07-11	47	1.5	0.48	126	1.995	1.259	1.585	1.413	1.995	1.778	1.995	1.778	1.995	1.259	3.162
sub8	2015-07-11	47	1.5	0.48	126	1.703	1.585	2.239	1.778	1.995	1.778	1.995	1.778	1.995	1.259	1.413
sub8	2015-07-12	47	1.5	0.48	126	3.645	3.162	3.981	2.818	3.548	3.162	3.981	3.548	4.467	3.162	3.548
sub8	2015-07-12	47	1.5	0.48	126	3.182	3.981	5.012	2.818	3.548	3.162	4.467	3.162	3.548	2.239	2.512
sub8	2015-07-12	47	1.5	0.48	126	4.396	3.981	5.012	4.467	5.012	4.467	5.012	3.981	4.467	3.981	4.467
sub8	2015-07-12	47	1.5	0.48	126	2.831	2.512	3.162	2.818	3.162	2.818	3.162	2.512	3.162	2.512	2.818
sub8	2015-07-12	47	1.5	0.48	126	1.895	1.995	2.512	1.995	2.512	1.778	2.818	1.413	1.778	1.585	1.995
sub8	2015-07-12	47	1.5	0.48	126	3.112	3.162	4.467	3.162	3.548	3.162	3.548	2.818	3.162	2.818	3.162
sub8	2015-07-12	47	1.5	0.48	126	2.661	3.981	5.623	3.981	4.467	3.162	3.548	2.239	2.512	1.995	2.512
sub8	2015-07-12	47	1.5	0.48	126	3.442	5.012	6.31	3.981	5.012	3.162	3.548	2.818	3.981	3.162	3.981
sub8	2015-07-12	47	1.5	0.48	126	2.975	3.162	3.981	3.548	3.981	3.162	3.548	2.818	3.162	1.995	3.162
sub8	2015-07-12	47	1.5	0.48	126	1.457	1.259	1.585	1.413	1.995	1.413	1.585	1.122	1.585	1.259	1.778
sub8	2015-07-13	47	1.5	0.48	36	3.025	5.012	6.31	3.162	3.548	3.162	3.981	2.512	2.818	2.512	3.162
sub8	2015-07-13	47	1.5	0.48	36	2.58	5.012	6.31	3.162	3.548	3.162	3.548	2.239	2.512	1.778	2.239
sub8	2015-07-13	47	1.5	0.48	36	3.298	1.995	3.548	3.162	3.548	3.162	3.548	2.818	3.548	3.162	3.548
sub8	2015-07-13	47	1.5	0.48	36	3.704	2.512	4.467	3.981	5.012	3.981	4.467	3.981	4.467	2.512	2.818
sub8	2015-07-13	47	1.5	0.48	36	2.58	5.012	6.31	2.512	3.162	2.818	3.162	2.239	2.512	2.239	2.512
sub8	2015-07-13	47	1.5	0.48	126	2.16	5.012	6.31	5.623	6.31	3.162	3.548	1.585	1.995	1.259	1.413
sub8	2015-07-13	47	1.5	0.48	126	2.252	3.162	3.981	3.162	3.548	2.512	3.162	1.585	2.239	1.778	2.239
sub8	2015-07-13	47	1.5	0.48	126	2.299	3.981	5.012	2.512	2.818	1.778	2.512	2.239	2.512	2.239	2.512
sub8	2015-07-13	47	1.5	0.48	126	1.25	3.162	3.981	1.778	1.995	1.585	1.778	1	1.122	0.891	1.122
sub8	2015-07-13	47	1.5	0.48	126	1.39	7.943	1.259	1.413	1.259	1.413	1.259	1.585	1.413	1.778	0.891
sub9	2015-07-06	47	1.5	0.48	36	4.151	2.512	5.012	4.467	5.012	4.467	5.623	3.981	4.467	2.818	3.548
sub9	2015-07-06	47	1.5	0.48	36	3.485	7.943	6.31	7.943	4.467	5.012	2.818	3.548	3.162	3.548	2.818
sub9	2015-07-06	47	1.5	0.48	36	4.217	7.943	5.623	6.31	5.012	5.623	3.981	4.467	3.981	5.012	2.239
sub9	2015-07-06	47	1.5	0.48	36	3.927	7.943	4.467	5.012	3.981	4.467	3.548	3.981	3.548	4.467	3.548
sub9	2015-07-06	47	1.5	0.48	36	4.975	3.981	5.012	4.467	5.012	4.467	7.943	3.981	5.012	3.981	4.467
sub9	2015-07-06	47	1.5	0.48	36	3.111	3.162	5.012	4.467	5.623	2.239	3.162	2.818	3.162	2.818	4.467
sub9	2015-07-06	47	1.5	0.48	126	4.589	7.943	6.31	7.943	4.467	5.623	4.467	5.012	3.981	4.467	3.981
sub9	2015-07-06	47	1.5	0.48	126	4.805	7.943	6.31	7.079	5.623	6.31	3.981	4.467	3.981	5.623	4.467
sub9	2015-07-06	47	1.5	0.48	126	4.152	5.012	6.31	4.467	6.31	3.548	4.467	3.981	4.467	3.981	4.467
sub9	2015-07-06	47	1.5	0.48	126	4.986	7.943	3.548	5.012	4.467	5.623	5.012	6.31	3.981	5.012	3.981
sub9	2015-07-06	47	1.5	0.48	126	5.147	5.012	7.079	5.012	6.31	5.623	6.31	4.467	5.012	3.162	6.31
sub9	2015-07-08	47	1.5	0.48	36	3.944	5.012	6.31	3.981	5.012	3.981	5.012	3.162	3.981	3.548	3.981
sub9	2015-07-08	47	1.5	0.48	36	3.771	7.943	6.31	7.079	5.623	6.31	3.548	3.981	3.548	3.981	1.259
sub9	2015-07-08	47	1.5	0.48	36	3.306	3.981	5.012	3.981	4.467	3.162	3.548	3.162	3.981	2.818	3.162
sub9	2015-07-08	47	1.5	0.48	36	1.855	3.162	4.467	2.239	2.512	1.778	1.995	1.585	1.995	1.778	1.995
sub9	2015-07-08	47	1.5	0.48	36	2.309	3.162	4.467	2.818	3.162	2.512	2.818	2.239	2.512	1.778	1.995
sub9	2015-07-08	47	1.5	0.48	36	2.785	3.162	4.467	2.512	2.818	2.239	3.162	2.818	3.162	2.512	2.818
sub9	2015-07-08	47	1.5	0.48	36	2.766	7.943	4.467	5.012	2.818	3.162	2.818	3.162	2.512	3.162	1.778
sub9	2015-07-08	47	1.5	0.48	36	2.664	7.943	6.31	7.079	2.512	2.818	2.512	2.818	2.512	3.548	1.778
sub9	2015-07-08	47	1.5	0.48	36	2.081	2.512	3.548	2.818	3.162	1.778	2.239	1.995	2.239	1.995	2.239
sub9	2015-07-08	47	1.5	0.48	36	2.126	2.512	3.162	1.585	1.995	1.778	2.239	1.995	2.239	1.995	2.512
sub9	2015-07-09	47	1.5	0.48	36	2.299	1	2.239	1.778	2.239	1.778	2.512	2.239	2.512	2.239	2.512
sub9	2015-07-09	47	1.5	0.48	36	2.126	1.995	2.512	1.995	2.239	1.778	2.239	1.995	2.239	1.995	2.512
sub9	2015-07-09	47	1.5	0.48	36	2.779	3.981	5.012	3.548	3.981	2.512	3.548	2.512	3.162	1.778	3.162
sub9	2015-07-09	47	1.5	0.48	36	3.004	3.981	5.012	2.818	3.162	2.818	3.162	2.512	3.548	2.818	3.162
sub9	2015-07-09	47	1.5	0.48	36	3.003	3.981	5.012	4.467	5.012	1.995	2.818	2.512	3.548	3.162	3.981
sub9	2015-07-09	47	1.5	0.48	36	2.469	1.995	3.162	2.818	3.162	2.818	3.162	1.995	2.239	1.778	2.818
sub9	2015-07-09	47	1.5	0.48	36	2.821	3.162	3.981	3.162	3.548	3.162	3.548	2.818	3.162	1.995	2.239
sub9	2015-07-09	47	1.5	0.48	36	2.484	1.995	2.512	2.239	2.818	2.239	2.512	2.239	2.512	2.239	3.162
sub9	2015-07-09	47	1.5	0.48	36	3.004	3.981	5.623	2.512	3.548	3.162	3.548	2.818	3.162	2.512	2.818
sub9	2015-07-09	47	1.5	0.48	36	2.569	1.995	2.512	2.239	2.818	2.512	2.818	2.512	2.818	2.239	2.512
sub9	2015-07-10	47	1.5	0.48	36	1.48	5.012	6.31	5.623	6.31	1.259	1.778	1.259	1.585	1.413	1.585
sub9	2015-07-10	47	1.5	0.48	36	3.155	7.943	3.981	4.467	3.981	4.467	3.981	4.467	1.778	2.239	1.995
sub9	2015-07-10	47	1.5	0.48	36	2.443	3.162	3.981	2.512	2.818	2.512	3.162	2.239	2.512	1.995	2.239
sub9	2015-07-10	47	1.5	0.48	36	1.895	3.162	3.981	2.239	2.512	1.995	2.239	1.778	1.995	1.585	1.778
sub9	2015-07-10	47	1.5	0.48	36	2.482	2.512	3.162	2.512	2.818	2.239	2.512	1.995	2.818	2.512	2.818
sub9	2015-07-10	47	1.5	0.48	36	1.653	3.981	5.012	1.413	1.585	1.259	1.585	1.413	1.585	1.259	2.818
sub9	2015-07-10	47	1.5	0.48	36	1.573	0.794	1	0.794	1.585	1.413	1.585	1.259	1.413	1.259	2.512
sub9	2015-07-10	47	1.5	0.48	36	2.54	1.995	2.512	1.995	2.239	1.995	2.512	2.239	3.162	2.512	2.818
sub9	2015-07-10	47	1.5	0.48	36	2.401	3.162	3.981	2.239	2.512	2.239	2.818	2.239	2.512	1.778	2.818
sub9	2015-07-10	47	1.5	0.48	36	3.464	3.981	5.623	4.467	5.012	3.548	4.467	2.512	3.548	3.162	3.548
sub9	2015-07-11	47	1.5	0.48	36	2.529	2.512	3.162	1.995	2.818	2.239	2.818	2.239	2.818	2.239	2.818
sub9	2015-07-11	47	1.5	0.48	36	2.696	7.943	3.162	3.548	3.162	3.548	2.512	2.818	2.239	2.818	2.239
sub9	2015-07-11	47	1.5	0.48	36	2.62	3.162	3.981	2.239	3.162	2.512	2.818	2.512	2.818	2.239	2.818
sub9	2015-07-11	47	1.5	0.48	36	2.99	3.162	3.981	3.548	3.981	2.818	3.162	2.818	3.162	2.818	3.162
sub9	2015-07-11	47	1.5	0.48	36	3.523	5.012	6.31	3.981	4.467	3.981	4.467	3.162	3.548	2.818	3.162
sub9	2015-07-11	47	1.5	0.48	36	4.125	3.162	3.981	2.512	3.981	3.548	5.012	4.467	5.012	3.162	3.548
sub9	2015-07-11	47	1.5	0.48	36	1.264	3.981	5.012	2.239	2.512	1.413	1.778	1.122	1.259	0.891	1.122
sub9	2015-07-11	47	1.5	0.48	36	2.885	1.995	2.512	1.995	2.239	1.995	2.818	2.239	3.548	3.162	3.548
sub9	2015-07-11	47	1.5	0.48	36	2.724	1.995	2.818	2.512	3.981	3.162	3.548	2.239	3.162	1.995	2.239
sub9	2015-07-11	47	1.5	0.48	36	1.621	5.012	6.31	5.012	5.623	1.585	1.778	1.585	1.778	1.413	1.585
sub9	2015-07-12	47	1.5	0.48	36	2.831	1.995	2.818	2.512	2.818	2.512	2.818	2.512	3.162	2.818	3.162
sub9	2015-07-12	47	1.5	0.48	36	1.834	3.981	5.012	3.548	3.981	1.995	2.239	1.778	1.995	1.413	1.585
sub9	2015-07-12	47	1.5	0.48	36	2.707	3.162	3.981	2.818	3.548	2.512	3.162	2.512	3.548	1.995	2.512
sub9	2015-07-12	47	1.5	0.48	36	1.523	1	1.413	1.122	1.413	1	1.585	1.413	1.778	1.585	1.778
sub9	2015-07-12	47	1.5	0.48	36	1.595	1.585	2.239	1.778	1.995	1.585	1.778	1.585	1.778	1.259	1.585
sub9	2015-07-12	47	1.5	0.48	36	2.14	2.512	3.162	2.512	2.818	2.239	2.512	1.995	2.512	1.585	1.995
sub9	2015-07-12	47	1.5	0.48	36	1.505	1.259	1.585	1.259	1.585	1.413	1.585	1.413	1.778	1.259	1.585
sub9	2015-07-12	47	1.5	0.48	36	1.39	1.585	1.995	1.585	1.778	1.413	1.585	1.259	1.413	1.259	1.413
sub9	2015-07-12	47	1.5	0.48	36	2.299	7.943	4.467	5.012	3.981	4.467	1.778	1.995	1.778	1.995	1.778
sub9	2015-07-12	47	1.5	0.48	36	2.385	3.162	3.981	2.512	2.818	2.239	2.512	2.239	3.548	1.778	1.995
sub9	2015-07-13	47	1.5	0.48	36	1.043	1.259	1.585	0.891	1	0.891	1.122	1	1.122	1	1.122
sub9	2015-07-13	47	1.5	0.48	36	1.849	1.259	2.239	1.778	1.995	1.585	1.778	1.259	2.239	1.995	2.239
sub9	2015-07-13	47	1.5	0.48	36	1.689	1.995	2.512	1.995	2.239	1.413	1.778	1.585	1.778	1.585	1.995
sub9	2015-07-13	47	1.5	0.48	36	2.545	2.512	3.162	2.818	3.162	2.818	3.162	2.239	2.818	1.995	2.239
sub9	2015-07-13	47	1.5	0.48	36	1.505	1.585	1.995	1.778	1.995	1.413	1.778	1.413	1.585	1.259	1.585
sub9	2015-07-13	47	1.5	0.48	126	3.076	3.162	3.981	3.162	3.981	3.162	3.981	2.818	3.162	2.512	2.818
sub9	2015-07-13	47	1.5	0.48	126	2.722	2.512	3.162	2.818	3.548	2.512	2.818	2.512	2.818	2.512	3.162
sub9	2015-07-13	47	1.5	0.48	126	2.442	3.981	5.012	2.239	2.512	1.995	2.512	1.995	2.818	2.512	2.818
sub9	2015-07-13	47	1.5	0.48	126	2.203	3.162	3.981	2.512	2.818	2.239	2.512	1.995	2.239	1.995	2.239
sub9	2015-07-13	47	1.5	0.48	126	3.165	7.943	4.467	5.623	3.162	3.548	2.512	3.548	3.162	3.981	2.239
sub10	2016-05-04	47	1.5	0.48	36	3.451	2.512	3.981	2.818	3.162	2.818	3.548	3.162	3.548	3.162	4.467
sub10	2016-05-04	47	1.5	0.48	36	4.658	3.981	5.012	3.981	4.467	3.981	5.012	4.467	5.012	4.467	5.012
sub10	2016-05-04	47	1.5	0.48	36	4.607	5.012	6.31	5.012	6.31	5.012	5.623	4.467	5.012	3.548	3.981
sub10	2016-05-04	47	1.5	0.48	36	4.017	2.512	3.981	3.162	3.981	3.548	3.981	3.548	5.012	3.548	4.467
sub10	2016-05-04	47	1.5	0.48	36	3.385	3.981	5.012	2.512	3.162	2.818	3.162	2.818	3.981	3.548	3.981
sub10	2016-05-04	47	1.5	0.48	36	3.644	3.981	6.31	3.981	4.467	3.548	4.467	3.981	4.467	2.239	3.162
sub10	2016-05-04	47	1.5	0.48	126	4.703	10	5.012	7.079	5.623	6.31	3.981	4.467	3.981	5.012	4.467
sub10	2016-05-04	47	1.5	0.48	126	5.318	3.981	6.31	4.467	5.623	5.012	5.623	5.012	5.623	5.012	5.623
sub10	2016-05-04	47	1.5	0.48	126	4.025	3.162	3.981	3.162	3.981	3.548	3.981	3.162	4.467	3.981	5.012
sub10	2016-05-04	47	1.5	0.48	126	3.58	3.162	3.981	3.162	3.548	3.162	3.548	3.162	3.981	3.162	4.467
sub10	2016-05-04	47	1.5	0.48	126	4.542	10	7.943	10	6.31	7.079	4.467	5.012	3.548	3.981	3.162
sub10	2016-05-04	47	1.5	0.48	126	3.451	3.981	5.012	3.548	4.467	3.162	3.548	2.818	3.548	3.162	4.467
sub10	2016-05-05	47	1.5	0.48	126	3.334	5.012	6.31	5.012	6.31	2.512	3.548	2.818	3.981	3.162	3.981
sub10	2016-05-05	47	1.5	0.48	126	4.345	7.943	3.981	5.012	4.467	5.623	3.981	4.467	3.548	4.467	3.981
sub10	2016-05-05	47	1.5	0.48	126	3.645	3.981	5.012	3.981	4.467	3.162	3.981	3.548	4.467	3.162	3.548
sub10	2016-05-05	47	1.5	0.48	126	3.69	2.512	3.162	2.239	5.623	3.981	4.467	2.512	3.548	3.162	4.467
sub10	2016-05-05	47	1.5	0.48	126	2.741	3.981	5.012	3.981	5.012	2.512	2.818	2.239	2.818	2.512	3.548
sub10	2016-05-05	47	1.5	0.48	126	4.315	5.012	7.943	4.467	5.623	3.981	4.467	3.981	4.467	3.981	5.012
sub10	2016-05-05	47	1.5	0.48	126	3.579	7.943	3.162	3.981	3.548	3.981	3.548	3.981	3.162	3.981	2.818
sub10	2016-05-05	47	1.5	0.48	126	4.413	5.012	6.31	5.012	6.31	5.012	5.623	4.467	5.012	2.818	3.548
sub10	2016-05-05	47	1.5	0.48	126	3.409	1.995	3.981	3.162	3.548	2.512	3.548	3.162	3.981	2.239	5.012
sub10	2016-05-05	47	1.5	0.48	126	2.895	3.162	3.981	3.162	3.548	2.818	3.162	2.512	2.818	2.512	3.548
sub10	2016-05-06	47	1.5	0.48	126	2.844	3.981	5.012	2.512	2.818	2.512	2.818	2.512	3.548	2.512	3.162
sub10	2016-05-06	47	1.5	0.48	126	1.67	3.162	3.981	1.995	2.239	1.995	2.512	1.259	1.413	1.259	1.585
sub10	2016-05-06	47	1.5	0.48	126	3.068	1.995	3.162	2.512	3.548	3.162	3.548	2.818	3.548	2.512	2.818
sub10	2016-05-06	47	1.5	0.48	126	2.317	2.512	3.162	1.585	1.778	1.585	2.512	2.239	2.512	2.239	2.818
sub10	2016-05-06	47	1.5	0.48	126	2.645	1.995	3.981	2.818	3.162	2.818	3.548	2.239	2.512	2.239	2.512
sub10	2016-05-06	47	1.5	0.48	126	3.055	3.981	5.012	3.162	3.548	2.818	3.162	2.818	3.162	2.818	3.548
sub10	2016-05-06	47	1.5	0.48	126	2.58	5.012	6.31	2.512	3.162	2.512	2.818	2.239	2.512	2.239	3.162
sub10	2016-05-06	47	1.5	0.48	126	3.043	7.943	5.012	6.31	3.548	3.981	2.818	3.548	2.512	3.162	2.239
sub10	2016-05-06	47	1.5	0.48	126	2.745	7.943	1.585	2.512	2.239	2.818	2.512	3.162	2.818	3.162	1.995
sub10	2016-05-06	47	1.5	0.48	126	3.449	3.981	5.012	3.548	3.981	2.818	3.548	2.818	3.981	3.548	3.981
sub10	2016-05-07	47	1.5	0.48	126	2.665	3.162	6.31	4.467	5.623	2.512	2.818	2.512	2.818	2.512	2.818
sub10	2016-05-07	47	1.5	0.48	126	2.785	2.512	3.162	2.512	2.818	2.512	3.162	2.818	3.162	2.239	2.818
sub10	2016-05-07	47	1.5	0.48	126	3.201	3.981	5.012	2.512	2.818	2.239	3.548	3.162	3.548	3.162	3.548
sub10	2016-05-07	47	1.5	0.48	126	1.436	2.512	3.162	1.778	1.995	1	1.259	1	1.995	1.585	1.778
sub10	2016-05-07	47	1.5	0.48	126	2.957	2.512	3.981	3.162	3.981	3.548	3.981	2.818	3.162	1.995	2.239
sub10	2016-05-07	47	1.5	0.48	126	4.11	5.012	6.31	3.981	4.467	3.981	5.623	3.548	3.981	3.548	3.981
sub10	2016-05-07	47	1.5	0.48	126	2.396	2.512	5.012	2.818	3.162	1.995	2.818	1.995	2.512	2.239	2.818
sub10	2016-05-07	47	1.5	0.48	126	4.645	3.981	6.31	4.467	5.012	3.162	4.467	3.981	5.623	5.012	5.623
sub10	2016-05-07	47	1.5	0.48	126	3.934	3.162	5.012	3.981	4.467	3.548	3.981	3.162	4.467	3.981	4.467
sub10	2016-05-07	47	1.5	0.48	126	3.724	1.995	3.981	3.162	3.548	2.818	3.981	3.548	3.981	3.548	4.467
sub10	2016-05-08	47	1.5	0.48	126	3.004	3.162	3.981	3.162	3.981	2.512	3.548	2.818	3.162	2.818	3.162
sub10	2016-05-08	47	1.5	0.48	126	2.728	3.981	5.012	3.162	3.548	2.818	3.162	2.239	2.818	2.512	2.818
sub10	2016-05-08	47	1.5	0.48	126	3.999	3.981	6.31	5.012	5.623	3.548	4.467	3.981	4.467	3.548	3.981
sub10	2016-05-08	47	1.5	0.48	126	4.269	3.981	6.31	3.162	5.012	3.981	5.012	3.981	5.012	3.162	4.467
sub10	2016-05-08	47	1.5	0.48	126	3.5	7.943	6.31	7.943	3.162	3.981	3.162	3.548	3.162	3.981	3.162
sub10	2016-05-08	47	1.5	0.48	126	3.004	1.995	5.012	2.818	3.162	2.818	3.162	2.512	3.162	2.818	3.548
sub10	2016-05-08	47	1.5	0.48	126	1.941	1.585	1.995	1.585	1.778	1.585	2.512	1.778	1.995	1.778	1.995
sub10	2016-05-08	47	1.5	0.48	126	2.875	3.162	5.012	2.818	3.548	2.239	2.512	2.239	3.548	3.162	3.548
sub10	2016-05-08	47	1.5	0.48	126	3.427	3.981	5.012	3.981	5.012	3.162	3.981	3.162	3.548	3.162	3.548
sub10	2016-05-08	47	1.5	0.48	126	4.224	5.012	6.31	4.467	5.012	3.981	4.467	3.981	4.467	3.981	4.467
sub10	2016-05-09	47	1.5	0.48	126	2.163	7.943	1.995	2.512	2.239	2.512	1.995	2.239	1.995	2.239	1.995
sub10	2016-05-09	47	1.5	0.48	126	2.734	2.512	3.162	2.512	2.818	2.239	3.162	2.512	3.162	2.512	2.818
sub10	2016-05-09	47	1.5	0.48	126	3.004	2.512	3.162	1.995	2.818	2.512	3.548	2.818	3.162	2.818	3.162
sub10	2016-05-09	47	1.5	0.48	126	3.659	5.012	6.31	3.548	3.981	3.548	5.623	2.818	3.162	2.818	3.981
sub10	2016-05-09	47	1.5	0.48	126	2.426	3.981	5.012	3.162	3.548	2.239	2.818	2.239	2.512	2.239	2.512
sub10	2016-05-09	47	1.5	0.48	126	2.472	1.995	3.981	2.818	3.162	2.512	2.818	2.239	2.512	2.239	2.512
sub10	2016-05-09	47	1.5	0.48	126	2.958	1.995	3.162	2.239	3.162	2.818	3.162	2.818	3.548	2.239	3.162
sub10	2016-05-09	47	1.5	0.48	126	2.813	1.585	2.512	1.995	2.512	2.239	2.818	2.512	2.818	2.512	3.981
sub10	2016-05-09	47	1.5	0.48	126	2.574	3.162	3.981	2.239	2.818	2.239	2.818	2.512	2.818	2.239	2.818
sub10	2016-05-09	47	1.5	0.48	126	2.895	2.512	3.162	2.239	2.818	2.512	2.818	2.512	3.548	2.818	3.162
sub10	2016-05-11	47	1.5	0.48	36	3.953	3.981	5.012	3.162	3.548	3.162	4.467	3.548	5.012	3.548	3.981
sub10	2016-05-11	47	1.5	0.48	36	3.248	2.512	5.012	3.981	4.467	3.548	3.981	2.818	3.162	2.818	3.162
sub10	2016-05-11	47	1.5	0.48	36	3.846	5.012	6.31	4.467	5.012	3.548	3.981	3.548	3.981	3.548	4.467
sub10	2016-05-11	47	1.5	0.48	36	4.156	3.162	3.981	2.239	2.512	1.995	4.467	3.981	5.012	4.467	5.012
sub10	2016-05-11	47	1.5	0.48	36	2.504	3.981	5.012	3.162	3.981	2.818	3.162	1.778	2.512	2.239	2.512
sub10	2016-05-11	47	1.5	0.48	36	3.508	3.981	6.31	3.981	5.012	3.162	3.548	3.162	3.548	3.162	4.467
sub10	2016-05-11	47	1.5	0.48	126	3.116	12.589	3.981	5.012	3.548	3.981	3.162	3.981	2.512	2.818	2.239
sub10	2016-05-11	47	1.5	0.48	126	3.427	5.012	6.31	3.548	3.981	3.162	3.548	3.162	3.981	3.162	3.548
sub10	2016-05-11	47	1.5	0.48	126	2.631	2.512	5.012	3.548	3.981	2.818	3.162	2.239	2.512	2.239	2.818
sub10	2016-05-11	47	1.5	0.48	126	3.067	5.012	6.31	2.818	3.162	2.818	4.467	2.818	3.548	2.239	2.512
sub10	2016-05-11	47	1.5	0.48	126	2.472	3.981	5.012	2.818	3.548	2.818	3.548	1.995	2.239	1.995	2.239
sub10	2016-05-11	47	1.5	0.48	126	1.675	7.943	1.995	3.162	2.818	3.548	1.413	1.585	1.122	1.259	1.122
