# Supplementary material for: Bottom-up and top-down influences at untrained conditions determine perceptual learning specificity and transfer
Source: eLife. 2016 Jul 5;5:e14614. doi: 10.7554/eLife.14614 (PMC4965262; doi:10.7554/eLife.14614)
Supplement: Figure 2—source data 1. — The other data sheets contain raw staircase data for 2b and 2c. DOI: http://dx.doi.org/10.7554/eLife.14614.006 [file elife-14614-fig2-data1.xlsx]

## Sheet: Summary_Fig1
Figure 2b
Average(N = 10)
Session	Trained	error	Orthogonal	error
day1	3.65757	0.325317	3.66059	0.274573
day2	3.23144	0.26893
day3	2.88045	0.276611
day4	2.56422	0.302504
day5	2.48153	0.333817
day6	2.20258	0.313545
day7	2.21575	0.244595	2.60531	0.260881
IMP	0.394754	0.0352121	0.290415	0.0343632
TI			0.773915	0.098495
Individuals
SUB1	Trained	error	Orthogonal	error		SUB2	Trained	error	Orthogonal	error		SUB3	Trained	error	Orthogonal	error
day1	3.78908	0.526603	3.76847	0.50919		day1	3.67958	0.515539	2.78884	0.190561		day1	2.69076	0.455268	4.12215	0.393781
day2	3.32385	0.308843				day2	2.68113	0.139961				day2	3.28274	0.330755
day3	2.80756	0.231596				day3	3.14104	0.178707				day3	2.71541	0.253085
day4	3.02391	0.324853				day4	1.67228	0.16797				day4	2.65463	0.21165
day5	2.18404	0.321194				day5	1.58871	0.170694				day5	2.05023	0.268334
day6	1.83516	0.219124				day6	1.28383	0.115294				day6	1.99603	0.258069
day7	1.82982	0.341318	1.94614	0.217179		day7	1.77484	0.158805	2.09959	0.325752		day7	1.86294	0.446475	2.51878	0.332794
IMP	0.517081		0.483572			IMP	0.517651		0.247147			IMP	0.307654		0.388965
TI			0.935195			TI			0.477439			TI			1.26429
SUB4	Trained	error	Orthogonal	error		SUB5	Trained	error	Orthogonal	error		SUB6	Trained	error	Orthogonal	error
day1	3.037	0.293349	3.40815	0.21731		day1	4.18833	0.153261	3.27079	0.228811		day1	2.30456	0.27946	2.57625	0.468429
day2	2.67313	0.286587				day2	3.75613	0.247521				day2	2.13249	0.172331
day3	2.69312	0.329551				day3	3.43349	0.411933				day3	1.79697	0.14915
day4	2.02191	0.194883				day4	2.41481	0.28578				day4	1.451	0.157497
day5	1.80223	0.13691				day5	2.45218	0.304299				day5	1.90648	0.143554
day6	1.49937	0.249872				day6	2.36486	0.216422				day6	1.553	0.132226
day7	1.6779	0.299699	2.3103	0.107411		day7	2.27242	0.316626	2.80635	0.309679		day7	1.76381	0.153033	2.03296	0.34623
IMP	0.447514		0.322123			IMP	0.45744		0.141995			IMP	0.234644		0.210885
TI			0.719805			TI			0.310411			TI			0.898744
SUB7	Trained	error	Orthogonal	error		SUB8	Trained	error	Orthogonal	error		SUB9	Trained	error	Orthogonal	error
day1	5.37535	0.375477	4.6398	0.141441		day1	2.48267	0.306464	2.87302	0.311191		day1	4.14254	0.417516	3.82353	0.358301
day2	4.58755	0.35224				day2	2.14105	0.2638				day2	3.3383	0.346242
day3	4.25759	0.298409				day3	1.28148	0.223557				day3	2.89321	0.22753
day4	3.41522	0.317827				day4	1.56726	0.169481				day4	2.89865	0.29969
day5	4.41879	0.30078				day5	1.1671	0.152408				day5	3.42425	0.240215
day6	3.77429	0.280389				day6	0.981046	0.199309				day6	3.05348	0.17731
day7	3.25063	0.386949	3.55325	0.20268		day7	1.20568	0.40027	1.8203	0.814065		day7	2.98701	0.200488	2.50345	0.234942
IMP	0.395271		0.234179			IMP	0.51436		0.366415			IMP	0.278942		0.345252
TI			0.592451			TI			0.71237			TI			1.23772
SUB10	Trained	error	Orthogonal	error
day1	4.88578	0.243478	5.33492	0.745796
day2	4.39805	0.14916
day3	3.78461	0.295214
day4	4.52256	0.216851
day5	3.8213	0.227314
day6	3.68478	0.22357
day7	3.53249	0.334111	4.46201	0.456653
IMP	0.276985		0.163622
TI			0.590724
Figure 2c
Average(N = 8)
Session	Trained	error
day1	3.81463	0.443683
day2
day3
day4
day5
day6
day7	3.43556	0.335124
IMP	0.0798295	0.0440919
Individuals
SUB1	Trained	error		SUB2	Trained	error		SUB3	Trained	error
day1	2.64686	0.135399		day1	2.82991	0.217962		day1	3.12157	0.644996
day2				day2				day2
day3				day3				day3
day4				day4				day4
day5				day5				day5
day6				day6				day6
day7	2.90805	0.564527		day7	2.45901	0.254629		day7	3.10036	0.481726
IMP	-0.0986783			IMP	0.131064			IMP	0.00679477
SUB4	Trained	error		SUB5	Trained	error		SUB6	Trained	error
day1	3.61795	0.411678		day1	3.32062	0.414429		day1	4.77	0.439182
day2				day2				day2
day3				day3				day3
day4				day4				day4
day5				day5				day5
day6				day6				day6
day7	3.51768	0.606406		day7	3.38394	0.340423		day7	3.359	0.541735
IMP	0.0277155			IMP	-0.019069			IMP	0.295807
SUB7	Trained	error		SUB8	Trained	error
day1	6.46232	0.594424		day1	3.74783	0.347221
day2				day2
day3				day3
day4				day4
day5				day5
day6				day6
day7	5.63371	0.449709		day7	3.12276	0.266229
IMP	0.128221			IMP	0.166781
Figure 2d
Improvement
	Trained	error	Orthogonal	error
Fig 2b	0.394754	0.0352121	0.290415	0.0343632
			Exposed	error
Fig 2c			0.0798295	0.0440919
Figure 2e
Transfer index
	TI	err
Fig 1a	0.255222	0.102715
Fig 1f	0.240261	0.243351
Fig 2b	0.773915	0.098495

## Sheet: Raw_Fig2b
ID	date	contrast	spatial frequency (c/d)	standard deviation (deg)	orientation (deg)	threshold	preliminary reversals				experimental reversals
sub1	2015-05-29	47	1.5	0.48	36	3.287	7.943	5.012	6.31	4.467	5.012	2.818	3.162	2.512	3.981	2.239
sub1	2015-05-29	47	1.5	0.48	36	2.836	3.162	4.467	3.162	3.548	2.818	3.981	2.818	3.162	1.995	2.239
sub1	2015-05-29	47	1.5	0.48	36	2.712	7.943	3.981	4.467	3.162	3.548	2.818	3.162	2.239	2.512	1.995
sub1	2015-05-29	47	1.5	0.48	36	6.12	7.943	3.548	3.981	3.548	7.079	6.31	7.079	5.623	7.079	3.548
sub1	2015-05-29	47	1.5	0.48	36	4.243	3.981	5.623	3.548	4.467	3.981	5.012	3.981	4.467	3.548	4.467
sub1	2015-05-29	47	1.5	0.48	36	4.508	3.162	4.467	3.981	4.467	3.981	4.467	3.981	5.012	3.981	5.623
sub1	2015-05-29	47	1.5	0.48	126	5.648	3.981	6.31	5.012	5.623	5.012	6.31	5.623	6.31	5.012	5.623
sub1	2015-05-29	47	1.5	0.48	126	2.118	2.512	3.548	2.818	3.162	2.512	2.818	1.778	2.239	1.585	1.778
sub1	2015-05-29	47	1.5	0.48	126	4.896	5.012	7.079	4.467	5.012	3.981	5.623	5.012	6.31	3.981	4.467
sub1	2015-05-29	47	1.5	0.48	126	3.455	5.012	6.31	5.623	6.31	3.981	4.467	3.548	3.981	2.239	2.512
sub1	2015-05-29	47	1.5	0.48	126	3.37	3.981	5.012	2.818	3.548	2.818	3.548	3.162	3.548	3.162	3.981
sub1	2015-05-29	47	1.5	0.48	126	4.2	7.943	5.623	7.943	7.079	10	3.162	3.548	2.818	3.162	2.512
sub1	2015-06-01	47	1.5	0.48	36	2.821	3.162	4.467	3.548	3.981	3.162	3.548	2.818	3.162	1.995	2.239
sub1	2015-06-01	47	1.5	0.48	36	4.243	5.012	6.31	5.623	6.31	3.981	4.467	3.548	5.012	3.981	4.467
sub1	2015-06-01	47	1.5	0.48	36	2.404	3.981	5.012	3.548	4.467	2.818	3.548	2.239	2.818	1.413	1.585
sub1	2015-06-01	47	1.5	0.48	36	3.209	3.162	3.981	3.548	3.981	3.162	3.548	3.162	3.981	2.239	3.162
sub1	2015-06-01	47	1.5	0.48	36	2.636	3.162	4.467	3.548	3.981	1.995	2.818	2.512	2.818	2.512	3.162
sub1	2015-06-01	47	1.5	0.48	36	3.208	2.512	3.548	3.162	4.467	2.818	4.467	2.818	3.162	2.818	3.162
sub1	2015-06-01	47	1.5	0.48	36	3.837	7.943	6.31	7.079	6.31	7.079	3.162	3.981	2.818	3.162	2.818
sub1	2015-06-01	47	1.5	0.48	36	5.532	3.981	5.012	3.981	4.467	3.981	7.943	5.012	5.623	5.012	5.623
sub1	2015-06-01	47	1.5	0.48	36	2.492	5.012	6.31	4.467	5.012	3.548	3.981	2.239	2.512	1.259	1.413
sub1	2015-06-01	47	1.5	0.48	36	3.985	3.162	5.012	3.548	5.012	4.467	5.012	3.981	4.467	2.818	3.162
sub1	2015-06-03	47	1.5	0.48	36	3.902	3.162	3.981	3.548	3.981	3.548	3.981	3.548	5.623	3.162	3.548
sub1	2015-06-03	47	1.5	0.48	36	2.494	5.012	6.31	3.162	3.981	3.162	3.548	1.778	2.239	1.995	2.239
sub1	2015-06-03	47	1.5	0.48	36	2.942	2.512	3.548	2.818	3.548	3.162	3.548	3.162	3.548	1.995	2.239
sub1	2015-06-03	47	1.5	0.48	36	1.981	7.943	4.467	5.012	1.995	2.239	1.778	2.512	1.778	1.995	1.585
sub1	2015-06-03	47	1.5	0.48	36	3.212	5.012	7.079	3.162	3.548	3.162	3.981	2.818	3.981	2.512	2.818
sub1	2015-06-03	47	1.5	0.48	36	3.961	2.512	3.548	3.162	3.548	3.162	3.981	3.162	4.467	3.981	5.012
sub1	2015-06-03	47	1.5	0.48	36	3.319	3.162	3.981	3.162	3.981	3.548	3.981	3.162	3.548	2.512	3.162
sub1	2015-06-03	47	1.5	0.48	36	2.666	3.981	5.012	3.981	4.467	3.981	4.467	1.778	1.995	1.778	1.995
sub1	2015-06-03	47	1.5	0.48	36	2.728	1.995	2.818	1.778	3.548	2.818	3.162	2.239	2.818	2.512	2.818
sub1	2015-06-03	47	1.5	0.48	36	1.747	2.512	3.162	2.512	3.162	2.239	3.162	1	1.413	1.259	1.413
sub1	2015-06-06	47	1.5	0.48	36	4.587	10	6.31	7.079	5.012	5.623	5.012	5.623	3.981	4.467	2.818
sub1	2015-06-06	47	1.5	0.48	36	2.631	1.995	2.818	2.239	2.512	2.239	3.162	2.239	2.818	2.512	2.818
sub1	2015-06-06	47	1.5	0.48	36	2.663	1.585	1.995	1.778	1.995	1.778	2.818	2.239	3.162	2.818	3.162
sub1	2015-06-06	47	1.5	0.48	36	2.017	1.995	2.818	2.512	2.818	1.995	2.239	1.995	2.512	1.585	1.778
sub1	2015-06-06	47	1.5	0.48	36	1.264	2.512	3.162	1.259	1.413	1.122	1.259	1.122	1.413	1.259	1.413
sub1	2015-06-06	47	1.5	0.48	36	3.999	3.162	4.467	3.162	3.981	3.548	4.467	3.981	4.467	3.548	3.981
sub1	2015-06-06	47	1.5	0.48	36	3.636	2.512	3.162	2.512	3.548	3.162	3.981	3.162	3.981	3.548	3.981
sub1	2015-06-06	47	1.5	0.48	36	3.717	3.981	5.012	3.981	4.467	3.981	4.467	3.162	3.548	3.162	3.981
sub1	2015-06-06	47	1.5	0.48	36	3.779	2.512	3.162	2.239	2.818	2.512	3.162	2.512	5.012	4.467	5.012
sub1	2015-06-06	47	1.5	0.48	36	3.82	5.012	6.31	5.623	6.31	5.623	7.079	2.818	3.162	1.995	2.239
sub1	2015-06-07	47	1.5	0.48	36	4.658	5.012	6.31	3.981	4.467	3.981	5.012	4.467	5.012	4.467	5.012
sub1	2015-06-07	47	1.5	0.48	36	1.353	1	1.413	1.259	1.585	1.413	1.585	1.413	1.585	1	1.122
sub1	2015-06-07	47	1.5	0.48	36	1.599	1.995	2.512	2.239	3.162	1.413	1.995	1.413	1.585	1.413	1.778
sub1	2015-06-07	47	1.5	0.48	36	2.35	3.981	5.012	3.162	3.548	2.239	2.512	2.239	2.818	1.778	2.512
sub1	2015-06-07	47	1.5	0.48	36	3.007	7.943	5.623	6.31	3.548	3.981	3.548	3.981	2.239	2.512	1.778
sub1	2015-06-07	47	1.5	0.48	36	1.943	5.012	6.31	1.995	2.239	1.778	2.239	1.995	2.239	1.413	1.995
sub1	2015-06-07	47	1.5	0.48	36	1.827	1.995	2.512	1.995	2.239	1.585	1.778	1.585	1.995	1.778	2.239
sub1	2015-06-07	47	1.5	0.48	36	3.176	3.981	5.012	2.818	3.981	2.818	3.162	2.818	3.548	3.162	3.548
sub1	2015-06-07	47	1.5	0.48	36	2.101	7.943	1.778	2.239	1.995	2.818	1.995	2.239	1.778	1.995	1.778
sub1	2015-06-07	47	1.5	0.48	36	1.464	1	1.259	1.122	1.259	0.891	1.413	1.122	1.778	1.585	1.995
sub1	2015-06-10	47	1.5	0.48	36	2.09	1.585	1.995	1.778	1.995	1.778	2.239	1.995	2.239	1.778	2.512
sub1	2015-06-10	47	1.5	0.48	36	3.442	3.162	3.981	3.162	3.548	3.162	3.981	3.548	3.981	2.818	3.162
sub1	2015-06-10	47	1.5	0.48	36	2.04	1.585	1.995	1.778	2.239	1.995	2.239	1.995	2.239	1.778	1.995
sub1	2015-06-10	47	1.5	0.48	36	1.968	1.585	2.239	1.585	1.995	1.778	2.239	1.778	1.995	1.778	2.239
sub1	2015-06-10	47	1.5	0.48	36	2.386	2.512	3.162	2.239	2.512	1.995	2.512	2.239	2.818	2.239	2.512
sub1	2015-06-10	47	1.5	0.48	36	2.212	3.162	3.981	3.548	3.981	2.239	2.512	2.239	2.512	1.778	1.995
sub1	2015-06-10	47	1.5	0.48	36	1.368	2.512	3.162	1.778	1.995	1.778	1.995	1.122	1.259	0.794	1.259
sub1	2015-06-10	47	1.5	0.48	36	1.617	3.162	3.981	2.818	3.162	2.818	3.162	1	1.122	0.708	0.891
sub1	2015-06-10	47	1.5	0.48	36	1.364	1	1.259	0.891	1.413	1.259	1.413	1.259	1.413	1.259	1.585
sub1	2015-06-10	47	1.5	0.48	36	0.942	1.259	1.585	1	1.122	1	1.122	1	1.259	0.562	0.708
sub1	2015-06-11	47	1.5	0.48	36	2.417	1.995	2.818	2.512	3.548	2.818	3.162	2.512	2.818	1.413	1.778
sub1	2015-06-11	47	1.5	0.48	36	3.034	5.012	6.31	5.623	6.31	3.981	4.467	1.995	2.818	1.778	3.162
sub1	2015-06-11	47	1.5	0.48	36	1.666	1.995	2.512	1.259	1.585	1.122	1.585	1.413	1.778	1.585	2.512
sub1	2015-06-11	47	1.5	0.48	36	1.319	0.794	1	0.891	1.413	1.122	1.585	1.122	1.413	1.259	1.413
sub1	2015-06-11	47	1.5	0.48	36	1.273	1.995	2.512	1.259	1.413	1.259	1.413	1	1.585	1.122	1.259
sub1	2015-06-11	47	1.5	0.48	126	2.017	3.981	5.012	1.585	1.778	1.585	1.995	1.778	2.239	1.995	2.512
sub1	2015-06-11	47	1.5	0.48	126	1.718	1.995	2.818	2.512	2.818	1.585	1.778	1.585	1.995	1.585	1.778
sub1	2015-06-11	47	1.5	0.48	126	1.545	1.995	2.512	1.778	1.995	1.122	1.995	1.778	1.995	1.122	1.259
sub1	2015-06-11	47	1.5	0.48	126	1.863	3.162	3.981	2.239	2.512	1.995	2.239	1.585	1.778	1.585	1.995
sub1	2015-06-11	47	1.5	0.48	126	2.799	3.162	4.467	3.981	4.467	3.162	3.548	2.512	2.818	2.239	2.512
sub2	2015-05-30	47	1.5	0.48	36	3.276	5.012	6.31	5.623	6.31	3.548	3.981	3.548	3.981	1.778	2.818
sub2	2015-05-30	47	1.5	0.48	36	2.579	5.012	7.079	2.512	3.981	1.995	2.818	2.512	2.818	2.512	2.818
sub2	2015-05-30	47	1.5	0.48	36	2.523	10	3.981	4.467	2.239	2.512	2.239	2.818	2.239	2.818	2.512
sub2	2015-05-30	47	1.5	0.48	36	3.094	5.012	6.31	3.548	3.981	3.162	3.981	2.818	3.548	2.239	2.818
sub2	2015-05-30	47	1.5	0.48	36	3.298	3.162	3.981	3.162	3.548	3.162	3.548	2.818	3.548	3.162	3.548
sub2	2015-05-30	47	1.5	0.48	36	2.163	5.012	7.079	1.995	2.239	1.995	2.239	1.995	2.512	1.995	2.239
sub2	2015-05-30	47	1.5	0.48	126	3.319	5.012	6.31	4.467	5.012	3.162	3.548	2.512	3.548	3.162	3.981
sub2	2015-05-30	47	1.5	0.48	126	1.895	1.995	2.512	2.239	3.162	1.995	2.239	1.778	1.995	1.585	1.778
sub2	2015-05-30	47	1.5	0.48	126	3.37	7.943	5.012	5.623	3.162	3.981	3.162	3.548	3.162	3.548	2.818
sub2	2015-05-30	47	1.5	0.48	126	4.459	3.981	5.012	3.981	4.467	3.981	4.467	3.981	6.31	3.548	4.467
sub2	2015-05-30	47	1.5	0.48	126	5.024	7.943	6.31	7.079	5.623	7.079	3.981	4.467	3.981	5.623	5.012
sub2	2015-05-30	47	1.5	0.48	126	5.227	3.981	5.012	4.467	5.623	4.467	5.623	5.012	5.623	5.012	5.623
sub2	2015-05-31	47	1.5	0.48	126	3.127	7.943	3.981	4.467	2.818	3.162	2.818	3.162	2.818	3.981	2.818
sub2	2015-05-31	47	1.5	0.48	126	1.964	2.512	3.162	2.818	3.162	1.995	2.239	1.778	1.995	1.778	1.995
sub2	2015-05-31	47	1.5	0.48	126	3.094	3.981	5.623	3.548	3.981	3.548	3.981	2.818	3.162	2.239	2.818
sub2	2015-05-31	47	1.5	0.48	126	3.176	3.981	5.623	3.548	3.981	2.818	3.162	2.818	3.548	3.162	3.548
sub2	2015-05-31	47	1.5	0.48	126	2.163	3.981	5.012	2.239	2.512	1.995	2.239	1.995	2.512	1.995	2.239
sub2	2015-05-31	47	1.5	0.48	126	2.3	3.981	5.012	2.239	2.512	2.239	2.818	1.995	2.239	1.995	2.512
sub2	2015-05-31	47	1.5	0.48	126	2.616	2.512	3.162	2.818	3.548	3.162	3.548	2.239	2.512	1.995	2.239
sub2	2015-05-31	47	1.5	0.48	126	3.119	2.512	3.162	2.818	3.548	2.818	3.162	2.818	3.548	2.818	3.548
sub2	2015-05-31	47	1.5	0.48	126	2.866	0.794	1.122	0.891	2.512	2.239	2.512	1.995	3.162	2.818	4.467
sub2	2015-05-31	47	1.5	0.48	126	2.734	3.162	4.467	3.162	3.548	2.818	3.162	2.512	3.162	2.239	2.512
sub2	2015-06-01	47	1.5	0.48	126	4.383	7.943	5.623	6.31	5.012	5.623	5.012	5.623	3.548	3.981	2.512
sub2	2015-06-01	47	1.5	0.48	126	3.659	7.943	5.623	6.31	5.012	5.623	3.162	3.981	2.818	3.548	2.818
sub2	2015-06-01	47	1.5	0.48	126	3.225	3.162	3.981	3.548	3.981	2.512	2.818	2.512	3.981	3.548	3.981
sub2	2015-06-01	47	1.5	0.48	126	2.882	3.981	5.623	3.981	4.467	2.818	3.162	2.818	3.162	2.512	2.818
sub2	2015-06-01	47	1.5	0.48	126	2.454	3.162	3.981	2.818	3.548	1.995	2.239	1.995	2.818	2.512	3.162
sub2	2015-06-01	47	1.5	0.48	126	3.334	3.981	5.012	4.467	5.012	3.548	3.981	2.818	3.162	2.512	3.981
sub2	2015-06-01	47	1.5	0.48	126	3.385	3.981	7.079	2.818	3.162	2.818	3.162	2.818	3.981	3.548	3.981
sub2	2015-06-01	47	1.5	0.48	126	3.112	7.943	2.818	3.548	2.818	3.162	2.818	3.162	2.818	3.548	3.162
sub2	2015-06-01	47	1.5	0.48	126	2.866	7.943	4.467	5.012	3.548	3.981	3.162	3.548	1.995	2.512	1.995
sub2	2015-06-01	47	1.5	0.48	126	2.539	3.981	5.012	3.981	4.467	3.162	3.548	1.778	1.995	1.585	3.162
sub2	2015-06-02	47	1.5	0.48	126	2.154	3.162	3.981	3.548	3.981	2.818	3.162	1.585	1.778	1.585	1.995
sub2	2015-06-02	47	1.5	0.48	126	2.146	2.512	3.162	2.512	2.818	2.512	2.818	1.778	1.995	1.778	1.995
sub2	2015-06-02	47	1.5	0.48	126	2.009	3.981	5.012	2.818	3.548	2.512	2.818	1.585	1.778	1.585	1.778
sub2	2015-06-02	47	1.5	0.48	126	2.396	1.995	2.818	1.778	2.239	1.995	2.818	2.512	2.818	1.995	2.239
sub2	2015-06-02	47	1.5	0.48	126	1.293	1.259	1.585	1.122	1.259	0.891	1.259	1.122	1.585	1.122	1.778
sub2	2015-06-02	47	1.5	0.48	126	1.043	1	1.259	1	1.122	0.891	1.122	1	1.122	1	1.122
sub2	2015-06-02	47	1.5	0.48	126	2.421	3.162	3.981	3.548	3.981	2.818	3.548	2.239	2.512	1.413	1.995
sub2	2015-06-02	47	1.5	0.48	126	1.434	1.259	1.778	1.585	2.239	1.585	1.778	1.122	1.585	1.122	1.413
sub2	2015-06-02	47	1.5	0.48	126	1.462	1.259	1.585	1.413	1.585	1.413	1.585	1.413	1.778	1	1.585
sub2	2015-06-02	47	1.5	0.48	126	1.123	1.585	1.995	1.122	1.413	1.259	1.413	1.122	1.259	0.794	0.891
sub2	2015-06-03	47	1.5	0.48	126	0.895	3.981	5.012	3.548	3.981	0.891	1	0.794	0.891	0.794	1
sub2	2015-06-03	47	1.5	0.48	126	1.206	1.585	2.512	1.778	2.239	1.259	1.413	1.259	1.413	0.891	1
sub2	2015-06-03	47	1.5	0.48	126	1.551	1.259	1.585	1.413	1.995	1.122	1.585	1.413	1.995	1.413	1.778
sub2	2015-06-03	47	1.5	0.48	126	1.693	2.512	3.162	1.259	1.413	1	1.995	1.585	1.995	1.585	1.995
sub2	2015-06-03	47	1.5	0.48	126	1.19	3.162	3.981	1.778	1.995	1.122	1.259	1.122	1.259	1.122	1.259
sub2	2015-06-03	47	1.5	0.48	126	2.482	3.162	3.981	2.512	2.818	1.995	2.512	2.239	2.818	2.512	2.818
sub2	2015-06-03	47	1.5	0.48	126	2.045	1.995	2.512	1.778	1.995	1.778	2.239	1.995	2.239	1.778	2.239
sub2	2015-06-03	47	1.5	0.48	126	1.538	1.995	2.512	1.778	2.239	1.585	1.778	1.413	1.778	1.259	1.413
sub2	2015-06-03	47	1.5	0.48	126	2.523	1.995	2.512	2.239	2.512	2.239	2.512	2.239	2.818	2.512	2.818
sub2	2015-06-03	47	1.5	0.48	126	1.542	1.259	1.585	1.259	1.585	1.413	1.585	1.259	1.585	1.413	1.995
sub2	2015-06-04	47	1.5	0.48	126	1.588	3.981	5.012	3.162	3.981	1.585	2.239	1.413	1.585	1.122	1.585
sub2	2015-06-04	47	1.5	0.48	126	1.757	2.512	3.162	2.239	2.512	1.413	1.778	1.585	1.995	1.778	1.995
sub2	2015-06-04	47	1.5	0.48	126	1.153	1.259	1.585	1.122	1.259	1.122	1.413	1	1.122	1	1.259
sub2	2015-06-04	47	1.5	0.48	126	1.245	1.259	1.585	1	1.259	1.122	1.259	1.122	1.259	1.122	1.585
sub2	2015-06-04	47	1.5	0.48	126	0.908	1.259	1.585	1.259	1.413	1	1.259	0.794	0.891	0.708	0.794
sub2	2015-06-04	47	1.5	0.48	126	1.841	5.012	6.31	2.239	2.818	1.995	2.239	1.778	1.995	1.259	1.778
sub2	2015-06-04	47	1.5	0.48	126	1.679	1.995	2.512	2.239	2.512	1.995	2.239	1.413	1.585	1.259	1.585
sub2	2015-06-04	47	1.5	0.48	126	0.792	0.794	1	0.891	1	0.891	1	0.631	0.708	0.631	0.891
sub2	2015-06-04	47	1.5	0.48	126	1.109	1.259	1.585	0.891	1	0.891	1.259	1.122	1.259	1	1.122
sub2	2015-06-04	47	1.5	0.48	126	1.232	1.259	1.778	1	1.122	0.891	1.259	1.122	1.413	1.122	1.585
sub2	2015-06-05	47	1.5	0.48	36	3.197	1.585	2.239	1.995	3.162	2.818	3.981	3.162	3.548	2.512	3.162
sub2	2015-06-05	47	1.5	0.48	36	2.421	7.943	4.467	5.012	2.239	3.548	2.239	2.512	1.995	2.239	1.995
sub2	2015-06-05	47	1.5	0.48	36	2.304	3.162	5.012	1.995	2.818	2.239	2.818	2.239	2.512	1.778	2.239
sub2	2015-06-05	47	1.5	0.48	36	1.88	2.512	3.162	2.239	2.512	1.995	2.512	1.778	1.995	1.413	1.585
sub2	2015-06-05	47	1.5	0.48	36	1.217	3.162	3.981	2.818	3.162	1.122	1.585	1.413	1.585	0.708	0.891
sub2	2015-06-05	47	1.5	0.48	126	1.913	5.012	6.31	3.162	3.981	2.239	2.512	1.585	1.778	1.585	1.778
sub2	2015-06-05	47	1.5	0.48	126	2.28	3.981	5.012	3.162	3.548	1.995	2.512	1.995	2.239	1.778	3.162
sub2	2015-06-05	47	1.5	0.48	126	1.653	1.585	1.995	1.413	1.995	1.585	1.778	1.413	1.778	1.585	1.778
sub2	2015-06-05	47	1.5	0.48	126	1.314	1.585	1.995	1.413	1.585	1.413	1.585	1.413	1.585	0.891	1
sub2	2015-06-05	47	1.5	0.48	126	1.859	1.995	2.512	1.778	1.995	1.778	1.995	1.778	2.239	1.585	1.778
sub3	2015-05-30	47	1.5	0.48	36	3.212	7.943	2.512	3.162	2.818	3.548	3.162	3.981	2.818	3.981	1.778
sub3	2015-05-30	47	1.5	0.48	36	2.831	3.162	3.981	2.818	3.162	2.512	2.818	2.512	3.162	2.818	3.162
sub3	2015-05-30	47	1.5	0.48	36	2.276	2.512	3.162	2.818	3.162	2.818	3.162	1.585	1.995	1.585	2.512
sub3	2015-05-30	47	1.5	0.48	36	4.37	10	7.943	8.913	6.31	7.079	3.981	4.467	3.162	3.981	3.548
sub3	2015-05-30	47	1.5	0.48	36	1.157	1.259	1.585	1.413	1.778	1.259	1.413	1	1.259	0.891	1.122
sub3	2015-05-30	47	1.5	0.48	36	3.627	7.943	6.31	7.079	4.467	5.012	3.162	3.548	2.512	3.981	3.548
sub3	2015-05-30	47	1.5	0.48	126	5.284	3.981	5.012	4.467	5.012	4.467	5.012	3.981	6.31	5.623	6.31
sub3	2015-05-30	47	1.5	0.48	126	4.568	7.943	3.981	4.467	3.162	4.467	3.981	5.012	4.467	5.012	4.467
sub3	2015-05-30	47	1.5	0.48	126	3.701	7.943	6.31	7.943	5.012	5.623	3.162	3.548	3.162	3.548	3.162
sub3	2015-05-30	47	1.5	0.48	126	3.595	3.981	5.012	3.981	4.467	3.981	4.467	3.162	3.981	2.818	3.162
sub3	2015-05-30	47	1.5	0.48	126	5.239	3.981	5.623	5.012	5.623	5.012	5.623	5.012	6.31	4.467	5.012
sub3	2015-05-30	47	1.5	0.48	126	2.916	7.943	5.012	6.31	3.548	3.981	2.512	2.818	2.512	3.162	2.512
sub3	2015-05-31	47	1.5	0.48	36	3.492	3.981	5.012	3.162	5.623	3.548	3.981	3.162	3.548	3.162	3.548
sub3	2015-05-31	47	1.5	0.48	36	5.557	7.943	6.31	7.079	5.012	5.623	5.012	6.31	5.623	6.31	4.467
sub3	2015-05-31	47	1.5	0.48	36	2.958	3.162	3.981	2.818	3.162	2.818	3.162	2.239	3.548	2.818	3.162
sub3	2015-05-31	47	1.5	0.48	36	2.696	7.943	3.162	5.012	3.162	3.548	2.512	2.818	2.239	2.818	2.239
sub3	2015-05-31	47	1.5	0.48	36	3.507	7.943	3.981	4.467	3.162	3.981	3.548	3.981	3.162	3.548	2.818
sub3	2015-05-31	47	1.5	0.48	36	3.619	7.943	5.012	5.623	3.548	4.467	3.981	4.467	2.818	3.162	2.818
sub3	2015-05-31	47	1.5	0.48	36	1.827	1.585	2.239	1.995	3.162	1.995	2.239	1.585	1.778	1.585	1.778
sub3	2015-05-31	47	1.5	0.48	36	3.506	3.162	3.981	3.548	3.981	2.512	3.162	2.818	5.012	3.548	3.981
sub3	2015-05-31	47	1.5	0.48	36	2.558	1.585	2.239	1.995	2.239	1.778	1.995	1.778	2.818	2.512	4.467
sub3	2015-05-31	47	1.5	0.48	36	4.516	3.981	5.623	5.012	5.623	4.467	5.012	4.467	5.623	3.548	3.981
sub3	2015-06-01	47	1.5	0.48	36	1.871	1.585	1.995	1.778	1.995	1.778	2.239	1.778	2.239	1.413	1.778
sub3	2015-06-01	47	1.5	0.48	36	3.622	2.512	3.162	2.512	2.818	1.995	5.012	3.548	4.467	3.162	3.548
sub3	2015-06-01	47	1.5	0.48	36	3.176	3.981	5.012	3.548	3.981	3.162	3.548	2.818	3.162	2.818	3.548
sub3	2015-06-01	47	1.5	0.48	36	3.451	1.995	3.548	2.818	3.981	2.818	4.467	3.162	3.548	3.162	3.548
sub3	2015-06-01	47	1.5	0.48	36	3.409	3.981	5.012	3.981	4.467	2.239	3.981	3.548	5.012	2.512	3.162
sub3	2015-06-01	47	1.5	0.48	36	3.781	3.162	3.981	3.548	4.467	3.548	4.467	3.548	3.981	3.162	3.981
sub3	2015-06-01	47	1.5	0.48	36	1.956	3.162	3.981	3.548	3.981	1.413	1.585	1.413	2.818	1.995	2.512
sub3	2015-06-01	47	1.5	0.48	36	2.349	3.981	5.012	1.995	2.512	2.239	3.162	2.512	2.818	1.585	1.778
sub3	2015-06-01	47	1.5	0.48	36	1.786	1.259	1.585	1.413	1.995	1.778	1.995	1.585	1.995	1.585	1.778
sub3	2015-06-01	47	1.5	0.48	36	3.479	3.981	5.012	3.981	4.467	3.548	4.467	3.548	3.981	2.512	2.818
sub3	2015-06-01	47	1.5	0.48	36	3.306	3.162	3.981	3.548	3.981	3.162	3.548	3.162	3.981	2.818	3.162
sub3	2015-06-01	47	1.5	0.48	36	3.298	3.981	5.012	3.548	4.467	3.162	3.548	3.162	3.548	2.818	3.548
sub3	2015-06-01	47	1.5	0.48	36	4.76	5.012	7.079	6.31	7.079	5.012	5.623	4.467	5.012	3.981	4.467
sub3	2015-06-01	47	1.5	0.48	36	2.029	1.259	2.512	2.239	2.512	2.239	3.162	1.778	1.995	1.413	1.585
sub3	2015-06-01	47	1.5	0.48	36	1.773	1.995	2.818	2.239	3.548	2.239	2.512	1.778	2.512	0.708	0.891
sub3	2015-06-01	47	1.5	0.48	36	4.224	3.981	5.012	4.467	5.012	3.981	4.467	3.981	4.467	3.981	4.467
sub3	2015-06-01	47	1.5	0.48	36	1.679	1.259	1.778	1.585	2.239	1.995	2.239	1.413	1.585	1.259	1.585
sub3	2015-06-01	47	1.5	0.48	36	1.789	3.981	5.012	3.162	3.548	1.995	2.512	1.259	1.778	1.413	1.778
sub3	2015-06-01	47	1.5	0.48	36	3.492	5.012	6.31	3.981	5.012	3.981	5.012	2.818	3.162	2.818	3.162
sub3	2015-06-01	47	1.5	0.48	36	2.101	1.585	1.995	1.778	1.995	1.778	2.239	1.995	2.818	1.778	1.995
sub3	2015-06-02	47	1.5	0.48	36	3.564	5.012	6.31	3.981	4.467	3.548	3.981	3.162	3.981	3.162	3.548
sub3	2015-06-02	47	1.5	0.48	36	1.301	1.585	1.995	1.585	1.778	1.585	1.778	1.259	1.585	0.708	0.891
sub3	2015-06-02	47	1.5	0.48	36	2.335	3.981	5.012	2.512	2.818	1.995	2.512	2.239	2.512	2.239	2.512
sub3	2015-06-02	47	1.5	0.48	36	2.648	3.162	3.981	3.162	3.548	2.818	3.162	1.995	2.512	2.239	3.162
sub3	2015-06-02	47	1.5	0.48	36	0.843	1	1.259	1.122	1.259	0.794	0.891	0.794	0.891	0.794	0.891
sub3	2015-06-02	47	1.5	0.48	36	2.482	3.981	5.012	3.981	4.467	2.512	2.818	2.512	2.818	1.995	2.239
sub3	2015-06-02	47	1.5	0.48	36	2.54	3.162	3.981	3.548	3.981	2.512	3.162	2.512	2.818	1.995	2.239
sub3	2015-06-02	47	1.5	0.48	36	3.003	2.512	3.548	3.162	3.548	2.818	3.981	3.162	3.548	1.995	2.512
sub3	2015-06-02	47	1.5	0.48	36	2.3	1.995	2.512	1.995	2.239	1.995	2.818	2.239	2.512	1.995	2.239
sub3	2015-06-02	47	1.5	0.48	36	1.247	1.995	2.512	1.413	1.778	1.259	1.585	1.122	1.259	1	1.259
sub3	2015-06-03	47	1.5	0.48	36	2.946	3.981	5.012	2.818	3.162	2.818	3.548	2.818	3.981	1.995	2.512
sub3	2015-06-03	47	1.5	0.48	36	2.722	3.162	3.981	2.512	3.548	2.512	3.162	2.512	2.818	2.512	2.818
sub3	2015-06-03	47	1.5	0.48	36	3.298	3.162	3.981	3.548	3.981	3.162	3.548	3.162	3.548	2.818	3.548
sub3	2015-06-03	47	1.5	0.48	36	1.891	7.943	2.512	2.818	2.512	3.162	1.778	1.995	1.413	1.585	1.413
sub3	2015-06-03	47	1.5	0.48	36	1.774	7.943	2.818	3.548	2.239	3.162	1.585	1.778	1.413	1.585	1.122
sub3	2015-06-03	47	1.5	0.48	36	0.808	7.943	3.162	3.548	1.122	1.259	0.631	0.708	0.562	0.891	0.794
sub3	2015-06-03	47	1.5	0.48	36	2.758	5.012	6.31	3.981	4.467	3.162	3.548	2.512	2.818	1.995	2.512
sub3	2015-06-03	47	1.5	0.48	36	2.04	7.943	3.981	4.467	2.239	2.512	1.995	2.239	1.995	2.239	1.259
sub3	2015-06-03	47	1.5	0.48	36	1.754	7.943	3.981	4.467	2.818	3.162	1.585	1.778	1.413	1.585	1
sub3	2015-06-03	47	1.5	0.48	36	1.419	1.259	1.585	1.413	1.585	1.413	1.585	1.259	1.413	1.259	1.585
sub3	2015-06-04	47	1.5	0.48	36	3.278	3.981	5.012	3.548	3.981	2.818	3.162	2.512	3.548	3.162	4.467
sub3	2015-06-04	47	1.5	0.48	36	2.757	1.995	2.512	1.585	2.239	1.995	3.162	2.818	3.162	2.239	3.162
sub3	2015-06-04	47	1.5	0.48	36	1.688	1.995	2.818	2.512	2.818	2.239	2.512	1.259	1.585	1.122	1.413
sub3	2015-06-04	47	1.5	0.48	36	2.141	1.585	2.512	2.239	2.512	2.239	2.818	1.778	1.995	1.778	2.239
sub3	2015-06-04	47	1.5	0.48	36	0.687	1.259	1.585	1	1.122	0.794	0.891	0.794	0.891	0.355	0.398
sub3	2015-06-04	47	1.5	0.48	126	2.534	2.512	3.981	2.818	3.162	1.995	2.818	2.512	2.818	2.239	2.818
sub3	2015-06-04	47	1.5	0.48	126	3.255	1.585	2.512	2.239	3.162	2.239	2.512	2.239	5.012	3.548	3.981
sub3	2015-06-04	47	1.5	0.48	126	3.466	3.981	5.012	3.981	4.467	3.981	4.467	2.818	3.162	2.818	3.548
sub3	2015-06-04	47	1.5	0.48	126	1.941	1.995	3.162	2.512	2.818	1.995	2.512	1.778	1.995	1.585	1.778
sub3	2015-06-04	47	1.5	0.48	126	1.827	1.995	2.512	2.239	2.512	1.778	1.995	1.585	1.778	1.585	2.239
sub4	2015-05-30	47	1.5	0.48	36	3.831	3.162	5.623	4.467	5.012	4.467	5.012	3.162	3.981	2.818	3.548
sub4	2015-05-30	47	1.5	0.48	36	3.318	1.585	2.239	1.995	2.512	2.239	3.162	2.512	3.981	3.548	4.467
sub4	2015-05-30	47	1.5	0.48	36	2.939	1.585	2.239	1.778	3.162	2.512	3.162	2.818	3.162	2.818	3.162
sub4	2015-05-30	47	1.5	0.48	36	4.282	7.943	2.512	3.162	2.818	3.981	3.548	3.981	3.548	5.623	5.012
sub4	2015-05-30	47	1.5	0.48	36	3.37	5.012	7.079	4.467	5.623	3.162	3.548	3.162	3.548	2.818	3.981
sub4	2015-05-30	47	1.5	0.48	36	2.907	10	2.818	3.548	2.512	2.818	2.239	3.162	2.512	3.548	3.162
sub4	2015-05-30	47	1.5	0.48	126	4.435	5.012	6.31	5.623	8.913	5.012	5.623	3.981	4.467	3.548	3.981
sub4	2015-05-30	47	1.5	0.48	126	2.895	3.981	5.012	4.467	5.012	2.818	3.162	2.512	3.548	2.512	2.818
sub4	2015-05-30	47	1.5	0.48	126	2.666	3.162	3.981	3.548	4.467	3.981	4.467	1.778	1.995	1.778	1.995
sub4	2015-05-30	47	1.5	0.48	126	2.696	7.943	3.162	3.548	2.818	3.548	2.239	2.818	2.512	2.818	2.239
sub4	2015-05-30	47	1.5	0.48	126	3.37	2.512	3.548	3.162	3.548	2.818	3.548	3.162	3.548	3.162	3.981
sub4	2015-05-30	47	1.5	0.48	126	2.523	3.981	5.012	3.162	3.548	2.512	2.818	2.239	2.512	2.239	2.818
sub4	2015-05-31	47	1.5	0.48	126	4.28	7.943	5.012	5.623	5.012	5.623	3.981	4.467	3.981	4.467	3.162
sub4	2015-05-31	47	1.5	0.48	126	4.055	3.162	5.623	4.467	5.012	3.548	5.623	3.981	4.467	3.162	3.548
sub4	2015-05-31	47	1.5	0.48	126	3.043	3.162	3.981	3.548	3.981	3.162	3.548	2.512	2.818	2.239	3.981
sub4	2015-05-31	47	1.5	0.48	126	2.407	1.995	2.512	1.995	2.239	1.778	2.512	2.239	2.512	2.239	3.162
sub4	2015-05-31	47	1.5	0.48	126	2.871	7.943	3.162	4.467	3.548	3.981	2.512	3.162	2.239	2.818	2.512
sub4	2015-05-31	47	1.5	0.48	126	2.208	2.512	3.162	2.239	2.512	1.995	2.239	1.995	2.512	1.995	2.512
sub4	2015-05-31	47	1.5	0.48	126	1.927	1.585	1.995	1.778	2.239	1.778	2.239	1.778	1.995	1.778	1.995
sub4	2015-05-31	47	1.5	0.48	126	3.248	3.981	5.012	3.548	4.467	2.818	3.548	3.162	3.981	2.818	3.162
sub4	2015-05-31	47	1.5	0.48	126	1.354	3.162	3.981	2.512	2.818	1.585	1.778	1.122	1.259	1.122	1.259
sub4	2015-05-31	47	1.5	0.48	126	2.728	2.512	3.162	2.818	3.162	2.818	3.162	2.239	2.818	2.512	2.818
sub4	2015-06-01	47	1.5	0.48	126	1.786	1.995	2.512	1.778	1.995	1.778	1.995	1.585	1.778	1.585	1.995
sub4	2015-06-01	47	1.5	0.48	126	1.602	1.995	2.512	1.413	1.778	1.259	1.585	1.413	1.778	1.585	1.995
sub4	2015-06-01	47	1.5	0.48	126	4.487	3.981	5.012	3.981	5.012	3.981	4.467	3.981	5.012	4.467	5.012
sub4	2015-06-01	47	1.5	0.48	126	4.224	7.943	4.467	5.012	3.981	4.467	3.981	4.467	3.981	4.467	3.981
sub4	2015-06-01	47	1.5	0.48	126	1.628	2.512	3.162	1.995	2.239	1.995	2.239	1.413	1.585	1.122	1.413
sub4	2015-06-01	47	1.5	0.48	126	3.724	3.162	3.981	3.548	3.981	2.818	3.981	3.548	3.981	3.548	4.467
sub4	2015-06-01	47	1.5	0.48	126	3.204	3.981	5.012	3.548	3.981	3.548	3.981	2.818	3.548	2.512	2.818
sub4	2015-06-01	47	1.5	0.48	126	2.821	3.981	5.012	2.818	3.548	3.162	3.548	2.818	3.162	1.995	2.239
sub4	2015-06-01	47	1.5	0.48	126	2.523	1.995	2.512	1.585	2.512	2.239	2.818	2.512	2.818	2.239	2.512
sub4	2015-06-01	47	1.5	0.48	126	2.677	3.981	5.012	3.162	3.548	2.818	3.162	2.512	2.818	2.239	2.512
sub4	2015-06-02	47	1.5	0.48	126	2.884	2.512	3.981	3.548	3.981	3.548	3.981	1.995	2.239	1.995	3.548
sub4	2015-06-02	47	1.5	0.48	126	1.757	2.512	3.162	1.995	2.512	1.778	1.995	1.778	1.995	1.413	1.585
sub4	2015-06-02	47	1.5	0.48	126	2.085	1.995	2.818	2.239	2.818	2.239	2.512	1.995	2.512	1.259	1.995
sub4	2015-06-02	47	1.5	0.48	126	2.626	1.995	2.512	2.239	3.548	2.512	2.818	2.512	3.162	2.239	2.512
sub4	2015-06-02	47	1.5	0.48	126	1.981	3.162	4.467	2.239	2.512	2.239	2.512	1.778	1.995	1.585	1.778
sub4	2015-06-02	47	1.5	0.48	126	1.313	3.162	4.467	1.778	1.995	1.259	1.413	1.122	1.413	1.259	1.413
sub4	2015-06-02	47	1.5	0.48	126	1.984	2.512	3.162	1.413	1.585	1.413	2.239	1.778	2.239	1.995	2.239
sub4	2015-06-02	47	1.5	0.48	126	1.833	3.162	3.981	3.162	3.548	2.512	2.818	1.413	1.585	1.259	1.413
sub4	2015-06-02	47	1.5	0.48	126	1.37	1.259	1.585	1.259	1.413	1.259	1.413	1.122	1.585	1.259	1.585
sub4	2015-06-02	47	1.5	0.48	126	3.176	3.162	3.981	3.548	3.981	3.162	3.548	2.818	3.162	2.818	3.548
sub4	2015-06-03	47	1.5	0.48	126	1.325	1.995	2.512	1.259	1.413	1.259	1.778	1.122	1.413	1.122	1.259
sub4	2015-06-03	47	1.5	0.48	126	1.75	3.981	5.012	1.778	1.995	1.778	1.995	1.585	1.778	1.585	1.778
sub4	2015-06-03	47	1.5	0.48	126	2.249	3.162	3.981	2.239	2.512	2.239	2.512	1.995	2.239	1.995	2.512
sub4	2015-06-03	47	1.5	0.48	126	1.928	1.995	3.162	2.512	2.818	2.239	2.512	1.995	2.239	1	1.585
sub4	2015-06-03	47	1.5	0.48	126	1.551	1.585	1.995	1.585	1.995	1.778	1.995	1.413	1.585	1.122	1.413
sub4	2015-06-03	47	1.5	0.48	126	1.327	3.162	3.981	1.778	1.995	1	1.259	1.122	1.585	1.413	1.585
sub4	2015-06-03	47	1.5	0.48	126	2.3	2.512	3.162	2.512	2.818	2.512	2.818	1.995	2.239	1.995	2.239
sub4	2015-06-03	47	1.5	0.48	126	1.639	2.512	3.162	2.818	3.162	1.585	1.995	1.413	1.585	1.259	1.995
sub4	2015-06-03	47	1.5	0.48	126	2.636	2.512	3.162	2.512	3.162	2.818	3.162	2.512	2.818	1.995	2.512
sub4	2015-06-03	47	1.5	0.48	126	1.758	2.512	3.548	3.162	3.548	1.585	1.778	1.585	1.778	1.585	2.239
sub4	2015-06-04	47	1.5	0.48	126	1.197	3.981	5.012	2.239	2.818	1.259	2.239	0.794	1	0.891	1
sub4	2015-06-04	47	1.5	0.48	126	3.302	3.981	5.012	3.548	3.981	3.548	3.981	3.548	3.981	2.239	2.512
sub4	2015-06-04	47	1.5	0.48	126	0.495	0.316	0.631	0.501	0.562	0.501	0.562	0.501	0.562	0.398	0.447
sub4	2015-06-04	47	1.5	0.48	126	1.157	1.259	1.585	1.413	2.239	1.259	1.413	1.122	1.259	0.891	1
sub4	2015-06-04	47	1.5	0.48	126	2.309	3.981	5.012	3.162	3.548	2.512	2.818	2.239	2.512	1.778	1.995
sub4	2015-06-04	47	1.5	0.48	126	1.444	1.995	2.512	1.995	2.239	1.413	1.585	1.413	1.585	1.259	1.413
sub4	2015-06-04	47	1.5	0.48	126	1.195	1.585	1.995	1.585	1.778	1.585	1.778	0.891	1.122	0.794	1
sub4	2015-06-04	47	1.5	0.48	126	1.97	3.162	3.981	3.548	3.981	2.818	3.162	1.259	1.585	1.413	1.585
sub4	2015-06-04	47	1.5	0.48	126	2.194	3.162	3.981	2.818	3.548	2.818	3.162	1.413	1.995	1.778	1.995
sub4	2015-06-04	47	1.5	0.48	126	1.473	3.162	3.981	1.778	1.995	1.413	1.585	1.413	1.585	1.259	1.585
sub4	2015-06-05	47	1.5	0.48	36	2.431	1.995	2.512	2.239	2.818	2.512	2.818	2.239	2.512	1.995	2.512
sub4	2015-06-05	47	1.5	0.48	36	2.501	3.162	3.981	3.162	3.548	2.818	3.548	1.585	2.818	1.995	2.239
sub4	2015-06-05	47	1.5	0.48	36	2.375	2.512	3.162	1.995	2.512	2.239	2.512	2.239	2.512	2.239	2.512
sub4	2015-06-05	47	1.5	0.48	36	2.399	3.162	4.467	3.548	3.981	2.818	3.981	1.585	1.995	1.778	2.239
sub4	2015-06-05	47	1.5	0.48	36	1.9	2.512	3.162	1.995	2.239	1.778	2.239	1.778	2.239	1.585	1.778
sub4	2015-06-05	47	1.5	0.48	126	2.952	3.162	3.981	2.818	3.548	3.162	3.548	2.512	3.162	2.512	2.818
sub4	2015-06-05	47	1.5	0.48	126	1.451	1.585	2.239	1.778	1.995	1.778	1.995	1.259	1.413	1	1.259
sub4	2015-06-05	47	1.5	0.48	126	1.416	1.585	2.239	1.778	1.995	1.585	1.995	1.122	1.259	1.122	1.413
sub4	2015-06-05	47	1.5	0.48	126	1.542	2.512	3.162	2.239	2.818	1.413	1.585	1.259	1.585	1.413	1.995
sub4	2015-06-05	47	1.5	0.48	126	1.422	1.259	1.585	1.413	1.585	1.413	1.778	1.259	1.413	1.259	1.413
sub5	2015-06-02	47	1.5	0.48	36	4.345	3.162	6.31	3.981	4.467	3.981	5.623	3.981	4.467	3.548	4.467
sub5	2015-06-02	47	1.5	0.48	36	4.823	5.012	7.079	6.31	7.943	5.623	6.31	4.467	5.012	3.548	3.981
sub5	2015-06-02	47	1.5	0.48	36	4.243	7.943	5.012	7.079	4.467	5.012	3.981	4.467	3.981	4.467	3.548
sub5	2015-06-02	47	1.5	0.48	36	3.756	10	7.943	8.913	5.012	5.623	3.548	3.981	3.162	3.981	2.239
sub5	2015-06-02	47	1.5	0.48	36	4.152	5.012	7.079	3.981	4.467	3.981	4.467	3.548	4.467	3.981	4.467
sub5	2015-06-02	47	1.5	0.48	36	3.893	3.162	3.981	3.162	4.467	3.162	4.467	2.818	4.467	2.818	5.623
sub5	2015-06-02	47	1.5	0.48	126	3.197	5.012	6.31	3.981	5.012	3.548	3.981	2.818	3.162	2.512	3.162
sub5	2015-06-02	47	1.5	0.48	126	3.628	3.162	3.981	3.548	4.467	3.548	3.981	3.548	3.981	3.162	3.548
sub5	2015-06-02	47	1.5	0.48	126	3.97	5.012	6.31	3.981	5.012	4.467	5.012	3.162	3.548	3.162	4.467
sub5	2015-06-02	47	1.5	0.48	126	2.83	1.995	2.512	1.995	2.239	1.995	3.162	2.512	2.818	2.512	3.981
sub5	2015-06-02	47	1.5	0.48	126	2.523	3.981	5.012	3.548	3.981	2.239	2.818	2.512	2.818	2.239	2.512
sub5	2015-06-02	47	1.5	0.48	126	3.724	5.012	6.31	3.981	4.467	3.548	3.981	3.548	3.981	2.818	4.467
sub5	2015-06-03	47	1.5	0.48	36	2.817	3.162	4.467	3.548	4.467	2.818	3.162	1.778	3.162	2.818	3.162
sub5	2015-06-03	47	1.5	0.48	36	3.628	1.995	3.162	2.818	4.467	3.548	3.981	3.548	3.981	3.162	3.548
sub5	2015-06-03	47	1.5	0.48	36	4.09	3.981	5.012	3.548	5.012	4.467	5.012	3.548	3.981	3.548	3.981
sub5	2015-06-03	47	1.5	0.48	36	3.765	3.162	4.467	3.981	4.467	3.548	3.981	3.548	3.981	3.548	3.981
sub5	2015-06-03	47	1.5	0.48	36	2.967	2.512	3.162	1.995	3.162	2.818	3.548	3.162	3.981	1.778	2.512
sub5	2015-06-03	47	1.5	0.48	36	5.341	3.981	5.012	4.467	5.623	5.012	5.623	4.467	6.31	5.012	5.623
sub5	2015-06-03	47	1.5	0.48	36	2.99	3.981	5.012	4.467	6.31	2.818	3.162	2.818	3.162	2.818	3.162
sub5	2015-06-03	47	1.5	0.48	36	4.08	10	3.548	5.012	3.981	4.467	3.981	4.467	3.548	4.467	3.548
sub5	2015-06-03	47	1.5	0.48	36	4.024	3.981	5.012	2.818	3.162	2.512	3.981	3.162	5.012	4.467	5.012
sub5	2015-06-03	47	1.5	0.48	36	4.566	3.162	3.981	3.162	3.548	3.162	4.467	3.981	6.31	4.467	5.012
sub5	2015-06-04	47	1.5	0.48	36	2.836	3.981	5.623	3.162	3.981	2.818	3.162	2.818	3.162	2.239	2.818
sub5	2015-06-04	47	1.5	0.48	36	2.831	2.512	4.467	2.512	3.162	2.818	3.162	2.512	2.818	2.512	3.162
sub5	2015-06-04	47	1.5	0.48	36	4.739	5.012	6.31	5.623	6.31	4.467	5.012	4.467	5.012	4.467	5.012
sub5	2015-06-04	47	1.5	0.48	36	5.058	5.012	6.31	3.981	5.012	4.467	5.623	4.467	6.31	4.467	5.012
sub5	2015-06-04	47	1.5	0.48	36	5.905	3.981	5.012	3.981	5.623	5.012	5.623	5.012	7.079	5.623	7.079
sub5	2015-06-04	47	1.5	0.48	36	3.587	5.012	6.31	4.467	5.623	4.467	5.012	2.512	3.548	2.818	3.162
sub5	2015-06-04	47	1.5	0.48	36	3.159	5.012	6.31	3.981	4.467	3.548	3.981	2.818	3.548	2.239	2.818
sub5	2015-06-04	47	1.5	0.48	36	1.786	1.585	2.239	1.778	1.995	1.778	1.995	1.585	1.995	1.585	1.778
sub5	2015-06-04	47	1.5	0.48	36	2.359	7.943	1.995	2.239	1.585	1.995	1.585	1.995	1.778	3.981	2.818
sub5	2015-06-04	47	1.5	0.48	36	4.197	5.012	6.31	4.467	5.012	3.981	5.012	4.467	5.012	3.162	3.548
sub5	2015-06-05	47	1.5	0.48	36	2.05	1.995	2.512	1.585	2.239	1.995	2.512	1.778	1.995	1.778	2.239
sub5	2015-06-05	47	1.5	0.48	36	3.538	3.981	5.012	3.981	4.467	3.981	4.467	2.818	3.981	2.818	3.162
sub5	2015-06-05	47	1.5	0.48	36	1.895	1.585	2.818	1.585	1.778	1.585	1.995	1.778	1.995	1.778	2.239
sub5	2015-06-05	47	1.5	0.48	36	2.741	2.512	3.162	2.512	3.162	2.818	3.548	2.512	2.818	2.239	2.512
sub5	2015-06-05	47	1.5	0.48	36	1.599	1	2.512	1.778	1.995	1.413	1.778	1.259	1.778	1.585	1.778
sub5	2015-06-05	47	1.5	0.48	36	2.636	5.012	6.31	4.467	5.012	2.512	3.162	2.818	3.548	1.778	1.995
sub5	2015-06-05	47	1.5	0.48	36	3.067	3.162	3.981	2.818	3.162	2.239	2.818	2.512	4.467	2.818	3.548
sub5	2015-06-05	47	1.5	0.48	36	4.278	5.012	6.31	4.467	5.012	4.467	5.012	4.467	5.012	3.162	3.548
sub5	2015-06-05	47	1.5	0.48	36	1.334	3.162	3.981	2.239	2.512	1.585	1.778	1	1.259	1.122	1.259
sub5	2015-06-05	47	1.5	0.48	36	2.426	2.512	3.548	2.512	2.818	2.239	2.512	2.239	2.512	2.239	2.818
sub5	2015-06-06	47	1.5	0.48	36	2.907	3.981	5.012	3.548	3.981	3.162	3.548	2.818	3.162	2.239	2.512
sub5	2015-06-06	47	1.5	0.48	36	5.034	7.943	4.467	5.623	5.012	5.623	5.012	5.623	4.467	5.012	4.467
sub5	2015-06-06	47	1.5	0.48	36	1.936	1.995	2.512	1.995	2.239	1.778	2.239	1.995	2.239	1.585	1.778
sub5	2015-06-06	47	1.5	0.48	36	3.004	3.162	3.981	3.162	3.981	3.162	3.548	2.818	3.162	2.512	2.818
sub5	2015-06-06	47	1.5	0.48	36	1.743	3.981	5.012	2.512	2.818	2.239	2.512	1.259	1.413	1.259	1.778
sub5	2015-06-06	47	1.5	0.48	36	2.136	2.512	3.162	2.512	2.818	1.778	2.512	1.995	2.512	1.778	2.239
sub5	2015-06-06	47	1.5	0.48	36	2.599	3.981	5.012	2.512	2.818	2.239	2.818	2.239	2.512	2.239	3.548
sub5	2015-06-06	47	1.5	0.48	36	1.927	1.585	1.995	1.413	1.995	1.778	1.995	1.778	1.995	1.778	2.239
sub5	2015-06-06	47	1.5	0.48	36	2.086	2.512	3.548	1.995	2.239	1.995	2.239	1.995	2.512	1.778	1.995
sub5	2015-06-06	47	1.5	0.48	36	2.375	1.995	2.818	2.239	2.512	2.239	2.512	2.239	2.512	2.239	2.512
sub5	2015-06-07	47	1.5	0.48	36	1.818	1.995	2.512	1.995	2.239	1.778	1.995	1.778	1.995	1.585	1.778
sub5	2015-06-07	47	1.5	0.48	36	2.309	2.512	3.981	2.512	2.818	2.512	2.818	2.239	2.512	1.778	1.995
sub5	2015-06-07	47	1.5	0.48	36	1.996	1.995	3.548	2.818	3.162	2.818	3.162	1.413	1.585	1.413	1.585
sub5	2015-06-07	47	1.5	0.48	36	2.523	2.512	3.548	2.818	3.162	2.512	2.818	2.239	2.818	2.239	2.512
sub5	2015-06-07	47	1.5	0.48	36	2.368	3.162	3.981	3.548	3.981	2.818	3.548	1.778	2.239	1.585	2.239
sub5	2015-06-07	47	1.5	0.48	36	2.454	2.512	3.162	2.818	3.162	2.818	3.162	1.995	2.239	1.995	2.512
sub5	2015-06-07	47	1.5	0.48	36	2.836	3.162	3.981	3.162	3.548	2.818	3.162	2.818	3.162	2.239	2.818
sub5	2015-06-07	47	1.5	0.48	36	3.934	3.162	5.012	3.981	4.467	3.981	4.467	3.548	3.981	3.162	4.467
sub5	2015-06-07	47	1.5	0.48	36	2.831	3.162	4.467	2.818	3.162	2.512	2.818	2.512	3.162	2.818	3.162
sub5	2015-06-07	47	1.5	0.48	36	1.41	0.794	1.122	0.891	1	0.794	1.413	1.259	1.585	1.413	1.995
sub5	2015-06-09	47	1.5	0.48	36	3.5	3.981	5.012	2.818	3.981	3.162	3.548	3.162	3.981	3.162	3.981
sub5	2015-06-09	47	1.5	0.48	36	1.827	1.995	2.512	1.778	2.239	1.778	1.995	1.585	1.778	1.585	2.239
sub5	2015-06-09	47	1.5	0.48	36	1.786	2.512	3.162	1.585	1.778	1.585	1.778	1.585	1.995	1.778	1.995
sub5	2015-06-09	47	1.5	0.48	36	2.523	3.981	5.012	2.818	3.548	2.239	2.512	2.239	2.818	2.512	2.818
sub5	2015-06-09	47	1.5	0.48	36	2.103	1.995	2.512	2.239	2.512	1.995	2.512	2.239	2.512	1.585	1.778
sub5	2015-06-09	47	1.5	0.48	126	3.004	2.512	3.162	2.512	3.162	2.818	3.162	2.818	3.548	2.512	3.162
sub5	2015-06-09	47	1.5	0.48	126	1.948	3.162	3.981	2.818	3.162	2.512	2.818	1.585	1.778	1.413	1.585
sub5	2015-06-09	47	1.5	0.48	126	3.564	3.162	4.467	3.548	3.981	3.548	3.981	3.162	3.548	3.162	3.981
sub5	2015-06-09	47	1.5	0.48	126	3.466	5.012	6.31	3.548	4.467	3.162	3.548	2.818	3.981	2.818	4.467
sub5	2015-06-09	47	1.5	0.48	126	2.408	3.162	3.981	3.162	3.548	2.818	3.162	1.995	2.239	1.995	2.239
sub6	2015-06-02	47	1.5	0.48	36	3.262	3.162	3.981	3.162	3.981	3.548	3.981	2.512	3.548	2.818	3.162
sub6	2015-06-02	47	1.5	0.48	36	4.751	10	5.012	6.31	5.012	5.623	3.548	4.467	3.548	6.31	5.012
sub6	2015-06-02	47	1.5	0.48	36	1.718	2.512	3.548	2.239	2.512	1.585	1.778	1.585	1.778	1.585	1.995
sub6	2015-06-02	47	1.5	0.48	36	1.66	3.981	5.012	1.778	1.995	1.413	1.778	1.413	1.995	1.585	1.778
sub6	2015-06-02	47	1.5	0.48	36	2.559	1.995	2.512	2.239	2.512	1.995	2.512	2.239	2.818	2.239	3.548
sub6	2015-06-02	47	1.5	0.48	36	2.585	3.981	5.012	3.981	4.467	3.162	3.548	1.995	2.512	1.778	2.512
sub6	2015-06-02	47	1.5	0.48	126	3.159	3.981	6.31	2.239	2.818	2.239	3.548	2.818	3.548	2.818	3.981
sub6	2015-06-02	47	1.5	0.48	126	2.95	7.943	5.012	5.623	5.012	5.623	2.512	2.818	1.995	2.512	2.239
sub6	2015-06-02	47	1.5	0.48	126	2.212	5.012	6.31	2.239	2.512	1.778	2.239	1.995	2.512	2.239	2.512
sub6	2015-06-02	47	1.5	0.48	126	2.34	3.162	3.981	2.239	2.512	2.239	2.512	2.239	2.818	1.995	2.239
sub6	2015-06-02	47	1.5	0.48	126	2.554	3.981	5.012	3.981	4.467	2.818	3.162	2.818	3.162	1.585	1.778
sub6	2015-06-02	47	1.5	0.48	126	1.216	1.585	1.995	1.413	1.778	1.122	1.259	1.122	1.259	1.122	1.413
sub6	2015-06-04	47	1.5	0.48	126	2.535	3.162	4.467	2.818	3.162	2.239	2.512	2.239	2.818	2.239	3.162
sub6	2015-06-04	47	1.5	0.48	126	2.04	2.512	3.162	2.512	2.818	1.585	1.778	1	2.818	2.239	2.818
sub6	2015-06-04	47	1.5	0.48	126	2.068	1.585	2.239	1.995	2.239	1.995	2.239	1.585	1.995	1.778	2.818
sub6	2015-06-04	47	1.5	0.48	126	1.968	1	1.585	1.413	1.995	1.778	2.239	1.778	2.239	1.778	1.995
sub6	2015-06-04	47	1.5	0.48	126	1.863	1.995	2.512	1.995	2.239	1.995	2.239	1.585	1.995	1.585	1.778
sub6	2015-06-04	47	1.5	0.48	126	1.689	2.512	3.162	1.413	1.778	1.585	1.778	1.585	1.778	1.413	1.995
sub6	2015-06-04	47	1.5	0.48	126	2.81	3.981	5.012	2.818	3.548	3.162	3.548	2.239	3.162	2.239	2.512
sub6	2015-06-04	47	1.5	0.48	126	1.37	1.259	1.585	0.891	1.413	1.259	1.585	1.259	1.413	1.122	1.585
sub6	2015-06-04	47	1.5	0.48	126	2.386	2.512	3.548	2.239	2.512	2.239	2.512	2.239	2.818	1.995	2.512
sub6	2015-06-04	47	1.5	0.48	126	3.197	2.512	3.162	2.818	3.162	2.512	3.548	3.162	3.981	2.818	3.162
sub6	2015-06-05	47	1.5	0.48	126	1.901	1.259	1.585	1.259	1.413	1.259	2.512	1.778	2.818	1.259	1.778
sub6	2015-06-05	47	1.5	0.48	126	2.322	3.162	3.981	3.162	3.548	3.162	3.548	2.512	2.818	0.891	1
sub6	2015-06-05	47	1.5	0.48	126	1.428	1.995	2.512	1.122	1.259	1.122	1.413	1.259	1.778	1.413	1.585
sub6	2015-06-05	47	1.5	0.48	126	2.443	1	1.413	1.259	1.585	1.413	2.512	2.239	2.818	2.512	3.162
sub6	2015-06-05	47	1.5	0.48	126	1.863	5.012	6.31	1.778	1.995	1.585	1.995	1.585	2.239	1.778	1.995
sub6	2015-06-05	47	1.5	0.48	126	1.013	1.259	1.585	0.794	1.413	0.891	1.122	0.794	0.891	0.794	1.585
sub6	2015-06-05	47	1.5	0.48	126	1.335	2.512	3.162	2.239	2.512	1.122	1.413	0.891	1.585	1.413	1.585
sub6	2015-06-05	47	1.5	0.48	126	1.994	3.981	5.012	1.259	1.585	1.259	2.239	1.995	2.239	1.995	2.239
sub6	2015-06-05	47	1.5	0.48	126	2.355	1.995	2.512	1.585	2.512	2.239	2.818	2.239	2.818	1.778	2.239
sub6	2015-06-05	47	1.5	0.48	126	1.927	2.512	3.162	2.512	2.818	1.778	1.995	1.778	1.995	1.778	2.239
sub6	2015-06-06	47	1.5	0.48	126	1.336	1.259	1.778	1.259	1.413	1.259	1.413	1.259	1.413	1.259	1.413
sub6	2015-06-06	47	1.5	0.48	126	1.972	1.259	1.585	1.413	2.239	1.585	1.995	1.778	2.239	1.995	2.239
sub6	2015-06-06	47	1.5	0.48	126	1.428	2.512	3.548	2.239	2.512	1.585	1.778	1.122	1.413	1.259	1.413
sub6	2015-06-06	47	1.5	0.48	126	1.374	1.585	1.995	1.259	1.413	1.259	1.778	1.259	1.413	1.122	1.413
sub6	2015-06-06	47	1.5	0.48	126	1.122	0.794	1	0.891	1	0.891	1	0.891	1.413	1.122	1.413
sub6	2015-06-06	47	1.5	0.48	126	1.153	0.631	1.259	1.122	1.259	1.122	1.259	1	1.122	1	1.413
sub6	2015-06-06	47	1.5	0.48	126	1.364	1.585	1.995	1.413	1.995	1.259	1.413	1.259	1.413	1.259	1.585
sub6	2015-06-06	47	1.5	0.48	126	1.031	1.585	1.995	1.413	1.778	1.122	1.259	1	1.122	0.794	0.891
sub6	2015-06-06	47	1.5	0.48	126	2.702	3.162	3.981	3.162	3.548	3.162	3.548	2.239	2.512	2.239	2.512
sub6	2015-06-06	47	1.5	0.48	126	1.628	1	1.585	1.413	1.585	1.413	1.585	1.413	1.778	1.585	1.995
sub6	2015-06-07	47	1.5	0.48	126	1.547	3.162	3.981	1.122	1.259	1.122	1.413	1.259	1.413	1.259	2.818
sub6	2015-06-07	47	1.5	0.48	126	2.05	1.259	1.585	1	2.239	1.995	2.239	1.778	1.995	1.778	2.512
sub6	2015-06-07	47	1.5	0.48	126	1.913	1.995	2.512	2.239	2.512	2.239	2.512	1.585	1.778	1.585	1.778
sub6	2015-06-07	47	1.5	0.48	126	2.665	2.512	3.162	2.818	3.548	2.512	2.818	2.512	2.818	2.512	2.818
sub6	2015-06-07	47	1.5	0.48	126	2.727	1.585	2.512	1.778	1.995	1.778	2.818	2.239	3.162	2.818	3.548
sub6	2015-06-07	47	1.5	0.48	126	1.786	3.162	3.981	1.995	2.239	1.778	1.995	1.585	1.778	1.585	1.995
sub6	2015-06-07	47	1.5	0.48	126	2.126	1.995	2.512	1.413	2.818	1.995	2.512	1.778	2.239	1.995	2.239
sub6	2015-06-07	47	1.5	0.48	126	1.718	3.162	3.981	2.239	2.512	1.585	1.778	1.585	1.778	1.585	1.995
sub6	2015-06-07	47	1.5	0.48	126	1.617	1.995	2.512	1.413	1.585	1.259	1.585	1.259	1.778	1.585	2.239
sub6	2015-06-07	47	1.5	0.48	126	1.364	1.585	1.995	1.259	1.585	1.259	1.413	1.259	1.413	1.259	1.585
sub6	2015-06-08	47	1.5	0.48	126	1.718	3.981	5.012	2.818	3.162	1.585	1.778	1.585	1.995	1.585	1.778
sub6	2015-06-08	47	1.5	0.48	126	1.416	1.995	2.512	1.585	1.778	1.413	1.585	1.122	1.259	1.122	1.995
sub6	2015-06-08	47	1.5	0.48	126	2.09	2.512	3.548	2.818	3.162	2.239	2.512	1.778	1.995	1.778	2.239
sub6	2015-06-08	47	1.5	0.48	126	2.177	1.585	1.995	1.778	1.995	1.778	2.239	1.995	2.818	1.995	2.239
sub6	2015-06-08	47	1.5	0.48	126	1.927	2.512	3.162	1.995	2.512	1.778	2.239	1.778	1.995	1.778	1.995
sub6	2015-06-08	47	1.5	0.48	126	1.059	3.162	3.981	1.995	2.239	0.794	1	0.891	1	0.891	1.778
sub6	2015-06-08	47	1.5	0.48	126	0.924	1	1.259	1.122	1.259	0.891	1	0.794	0.891	0.708	1.259
sub6	2015-06-08	47	1.5	0.48	126	1.339	1.259	1.585	1.413	1.585	1.413	1.585	1	1.259	1	1.778
sub6	2015-06-08	47	1.5	0.48	126	1.662	3.162	3.981	2.239	2.512	2.239	2.818	1.122	1.259	1.122	1.413
sub6	2015-06-08	47	1.5	0.48	126	1.757	1.585	2.239	1.778	1.995	1.585	1.995	1.778	1.995	1.413	1.778
sub6	2015-06-09	47	1.5	0.48	36	3.302	3.162	4.467	3.981	4.467	3.548	3.981	3.548	3.981	2.239	2.512
sub6	2015-06-09	47	1.5	0.48	36	1.544	1.995	2.512	1.778	2.239	1.778	2.512	1.259	1.413	0.891	1.413
sub6	2015-06-09	47	1.5	0.48	36	2.137	10	5.012	6.31	3.981	4.467	1.585	1.995	1.413	1.778	1.585
sub6	2015-06-09	47	1.5	0.48	36	1.342	2.512	3.162	2.818	3.162	1.413	1.585	1.259	1.413	1.122	1.259
sub6	2015-06-09	47	1.5	0.48	36	2.375	1.995	2.512	2.239	2.512	2.239	2.512	2.239	2.512	2.239	2.512
sub6	2015-06-09	47	1.5	0.48	126	2.012	1.585	3.162	2.512	2.818	1.995	2.239	1.585	2.239	1.778	2.239
sub6	2015-06-09	47	1.5	0.48	126	1.737	1.995	2.512	2.239	2.818	1.413	1.995	1.778	2.239	1.413	1.585
sub6	2015-06-09	47	1.5	0.48	126	2.244	2.512	3.162	2.818	3.162	2.512	3.162	1.778	2.239	1.778	1.995
sub6	2015-06-09	47	1.5	0.48	126	1.39	2.512	3.162	1.413	1.778	1.413	1.585	1.259	1.413	1.259	1.413
sub6	2015-06-09	47	1.5	0.48	126	1.566	1	1.778	1	1.413	1.259	1.778	1.585	1.778	1.413	1.585
sub7	2015-06-12	47	1.5	0.48	36	6.234	3.981	5.012	4.467	5.012	4.467	5.623	5.012	7.079	6.31	8.913
sub7	2015-06-12	47	1.5	0.48	36	6.107	3.981	5.012	4.467	7.079	6.31	7.079	5.623	6.31	5.012	6.31
sub7	2015-06-12	47	1.5	0.48	36	5.088	5.012	7.079	6.31	7.079	5.012	5.623	3.981	5.623	3.981	6.31
sub7	2015-06-12	47	1.5	0.48	36	4.09	7.943	4.467	5.623	3.981	5.012	3.548	3.981	3.548	4.467	3.981
sub7	2015-06-12	47	1.5	0.48	36	6.337	5.012	6.31	5.623	6.31	5.623	6.31	5.623	7.079	6.31	7.079
sub7	2015-06-12	47	1.5	0.48	36	4.805	3.981	5.623	5.012	6.31	4.467	6.31	3.981	4.467	3.981	5.623
sub7	2015-06-12	47	1.5	0.48	126	4.781	7.943	5.623	7.943	3.548	4.467	3.981	5.623	5.012	5.623	3.981
sub7	2015-06-12	47	1.5	0.48	126	4.071	5.012	6.31	3.162	4.467	3.981	4.467	3.981	4.467	3.548	3.981
sub7	2015-06-12	47	1.5	0.48	126	4.739	7.943	5.012	6.31	3.981	5.012	4.467	5.012	4.467	5.012	4.467
sub7	2015-06-12	47	1.5	0.48	126	4.531	7.943	5.012	5.623	3.981	4.467	3.981	4.467	3.981	6.31	3.981
sub7	2015-06-12	47	1.5	0.48	126	5.125	3.981	7.943	5.012	5.623	5.012	5.623	5.012	5.623	4.467	5.012
sub7	2015-06-12	47	1.5	0.48	126	4.658	7.943	3.981	5.012	4.467	5.012	3.981	5.012	4.467	5.012	4.467
sub7	2015-06-13	47	1.5	0.48	36	4.106	7.943	6.31	7.079	4.467	5.012	3.548	4.467	3.162	4.467	3.981
sub7	2015-06-13	47	1.5	0.48	36	3.191	3.162	3.981	2.818	3.162	2.818	3.981	2.818	3.162	2.818	3.548
sub7	2015-06-13	47	1.5	0.48	36	3.536	10	3.981	4.467	2.512	3.548	2.512	3.548	3.162	4.467	3.981
sub7	2015-06-13	47	1.5	0.48	36	4.17	7.943	5.012	5.623	3.548	4.467	3.981	4.467	3.548	5.012	3.548
sub7	2015-06-13	47	1.5	0.48	36	5.305	7.943	6.31	7.079	5.623	6.31	5.623	6.31	3.981	5.623	3.981
sub7	2015-06-13	47	1.5	0.48	36	6.531	5.012	7.079	6.31	7.943	7.079	7.943	6.31	7.079	4.467	6.31
sub7	2015-06-13	47	1.5	0.48	36	5.116	3.162	4.467	3.548	3.981	2.818	5.012	4.467	7.079	5.012	6.31
sub7	2015-06-13	47	1.5	0.48	36	4.709	3.981	5.623	3.548	3.981	3.548	4.467	3.981	5.623	5.012	5.623
sub7	2015-06-13	47	1.5	0.48	36	5.581	3.162	3.981	3.548	5.012	4.467	6.31	5.623	6.31	4.467	6.31
sub7	2015-06-15	47	1.5	0.48	36	4.976	7.943	5.623	6.31	5.012	5.623	4.467	5.623	5.012	6.31	2.818
sub7	2015-06-15	47	1.5	0.48	36	4.8	7.943	3.548	4.467	3.548	3.981	3.548	5.623	5.012	5.623	5.012
sub7	2015-06-15	47	1.5	0.48	36	3.317	10	4.467	6.31	5.012	5.623	3.162	3.548	2.239	2.818	2.512
sub7	2015-06-15	47	1.5	0.48	36	5.456	10	5.012	7.079	5.623	6.31	5.012	6.31	5.012	5.623	4.467
sub7	2015-06-15	47	1.5	0.48	36	3.176	3.162	3.981	3.548	3.981	3.162	3.548	2.818	3.162	2.818	3.548
sub7	2015-06-15	47	1.5	0.48	36	3.449	2.512	3.981	2.818	3.548	2.818	3.548	2.818	3.981	3.548	3.981
sub7	2015-06-15	47	1.5	0.48	36	4.299	5.012	6.31	3.548	3.981	3.548	5.012	3.162	4.467	3.981	5.623
sub7	2015-06-15	47	1.5	0.48	36	3.996	3.162	5.012	4.467	7.079	5.623	6.31	2.512	3.162	2.818	3.548
sub7	2015-06-15	47	1.5	0.48	36	4.015	3.981	5.012	3.981	5.012	3.162	4.467	3.548	4.467	3.981	4.467
sub7	2015-06-15	47	1.5	0.48	36	5.993	5.012	6.31	5.623	7.079	6.31	7.079	5.623	6.31	5.012	5.623
sub7	2015-06-17	47	1.5	0.48	36	2.677	3.981	5.623	5.012	6.31	2.512	2.818	2.239	2.818	2.512	3.162
sub7	2015-06-17	47	1.5	0.48	36	3.505	1.995	2.512	2.239	2.512	2.239	2.818	2.512	4.467	3.981	5.012
sub7	2015-06-17	47	1.5	0.48	36	4.125	1.995	3.548	3.162	3.981	3.162	5.012	3.548	5.012	3.548	4.467
sub7	2015-06-17	47	1.5	0.48	36	2.928	3.162	3.981	3.162	3.548	3.162	3.981	2.512	3.162	2.239	2.512
sub7	2015-06-17	47	1.5	0.48	36	1.855	1	2.512	2.239	3.548	1.778	1.995	1.778	1.995	1.585	1.995
sub7	2015-06-17	47	1.5	0.48	36	3.153	5.012	6.31	5.623	6.31	3.548	3.981	2.512	2.818	2.512	3.548
sub7	2015-06-17	47	1.5	0.48	36	3.334	5.012	6.31	3.548	3.981	2.512	3.162	2.818	3.981	3.548	3.981
sub7	2015-06-17	47	1.5	0.48	36	4.881	5.012	7.079	3.981	4.467	3.548	5.623	5.012	5.623	4.467	5.012
sub7	2015-06-17	47	1.5	0.48	36	3.862	3.981	5.623	3.981	4.467	3.548	4.467	3.981	4.467	3.162	3.548
sub7	2015-06-17	47	1.5	0.48	36	5.182	7.943	5.623	7.079	5.623	6.31	5.012	6.31	4.467	5.012	3.981
sub7	2015-06-18	47	1.5	0.48	36	4.371	5.012	6.31	3.548	6.31	5.012	5.623	3.981	4.467	3.162	3.981
sub7	2015-06-18	47	1.5	0.48	36	4.414	3.981	5.623	3.548	3.981	3.548	4.467	3.981	5.012	4.467	5.012
sub7	2015-06-18	47	1.5	0.48	36	4.368	2.512	3.162	2.818	3.548	2.239	5.012	4.467	5.012	4.467	5.012
sub7	2015-06-18	47	1.5	0.48	36	2.947	7.943	3.548	3.981	2.818	3.981	2.239	2.512	2.239	3.548	3.162
sub7	2015-06-18	47	1.5	0.48	36	4.624	7.943	6.31	7.079	4.467	5.012	4.467	5.012	4.467	5.623	3.162
sub7	2015-06-18	47	1.5	0.48	36	5.865	3.981	5.012	4.467	5.623	5.012	6.31	5.623	6.31	5.623	6.31
sub7	2015-06-18	47	1.5	0.48	36	3.636	2.512	5.012	4.467	5.623	3.548	3.981	3.162	3.981	3.162	3.981
sub7	2015-06-18	47	1.5	0.48	36	5.966	5.012	7.079	6.31	7.943	5.623	6.31	5.623	6.31	5.623	6.31
sub7	2015-06-18	47	1.5	0.48	36	4.396	5.012	7.079	5.012	5.623	4.467	5.012	3.981	4.467	3.981	4.467
sub7	2015-06-20	47	1.5	0.48	36	4.686	7.943	6.31	7.943	5.623	6.31	5.623	6.31	3.162	3.548	3.162
sub7	2015-06-20	47	1.5	0.48	36	4.17	2.512	3.162	2.818	3.981	3.548	4.467	3.981	5.012	3.548	4.467
sub7	2015-06-20	47	1.5	0.48	36	4.427	1.259	1.585	1.413	2.239	1.778	6.31	3.981	5.012	4.467	5.012
sub7	2015-06-20	47	1.5	0.48	36	4.986	2.512	4.467	3.981	6.31	5.623	6.31	3.981	5.012	3.981	5.012
sub7	2015-06-20	47	1.5	0.48	36	4.589	5.012	6.31	5.623	7.079	5.012	5.623	3.981	4.467	3.981	4.467
sub7	2015-06-20	47	1.5	0.48	36	3.645	3.981	5.623	4.467	5.012	3.548	4.467	3.162	3.548	3.162	3.981
sub7	2015-06-20	47	1.5	0.48	36	3.798	5.012	6.31	4.467	5.012	3.981	4.467	3.162	4.467	3.162	3.548
sub7	2015-06-20	47	1.5	0.48	36	3.673	7.943	6.31	7.079	3.981	4.467	2.512	3.981	3.548	3.981	3.548
sub7	2015-06-20	47	1.5	0.48	36	4.105	7.943	3.162	3.981	3.548	3.981	3.548	4.467	3.162	6.31	3.162
sub7	2015-06-20	47	1.5	0.48	36	2.058	3.162	3.981	1.778	1.995	1.585	2.239	1.778	2.239	1.995	2.512
sub7	2015-06-20	47	1.5	0.48	36	2.604	2.512	3.548	1.995	2.512	1.995	2.512	2.239	2.818	2.512	3.548
sub7	2015-06-21	47	1.5	0.48	36	4.465	3.162	3.981	3.548	3.981	3.548	5.623	4.467	5.623	3.548	3.981
sub7	2015-06-21	47	1.5	0.48	36	2.882	5.012	6.31	5.623	6.31	2.818	3.162	2.818	3.162	2.512	2.818
sub7	2015-06-21	47	1.5	0.48	36	2.177	1.259	1.778	1.585	1.995	1.778	2.239	1.995	2.239	1.995	2.818
sub7	2015-06-21	47	1.5	0.48	36	3.724	7.943	5.012	5.623	3.981	4.467	3.548	3.981	3.548	3.981	2.818
sub7	2015-06-21	47	1.5	0.48	36	3.479	3.981	5.623	3.981	4.467	3.548	4.467	3.548	3.981	2.512	2.818
sub7	2015-06-21	47	1.5	0.48	126	3.298	3.981	5.012	4.467	5.012	3.162	3.548	2.818	3.548	3.162	3.548
sub7	2015-06-21	47	1.5	0.48	126	3.353	3.981	5.012	3.548	3.981	3.548	3.981	2.239	3.981	2.818	3.548
sub7	2015-06-21	47	1.5	0.48	126	4.333	5.012	6.31	4.467	7.079	3.981	4.467	3.981	5.012	3.548	5.012
sub7	2015-06-21	47	1.5	0.48	126	3.653	3.162	3.981	3.162	3.548	3.162	3.981	3.162	3.981	3.162	4.467
sub7	2015-06-21	47	1.5	0.48	126	3.236	3.162	6.31	3.981	5.012	3.981	4.467	2.239	2.512	2.239	3.981
sub8	2015-06-15	47	1.5	0.48	36	4.152	5.012	6.31	3.548	4.467	3.981	4.467	3.548	4.467	3.981	4.467
sub8	2015-06-15	47	1.5	0.48	36	2.523	1.995	2.512	2.239	2.512	2.239	2.512	2.239	2.818	2.512	2.818
sub8	2015-06-15	47	1.5	0.48	36	2.494	5.012	6.31	2.818	3.162	2.818	3.162	2.239	2.512	1.995	2.239
sub8	2015-06-15	47	1.5	0.48	36	3.627	5.012	6.31	3.548	4.467	3.548	3.981	2.239	4.467	3.548	3.981
sub8	2015-06-15	47	1.5	0.48	36	2.677	3.981	5.012	2.512	3.162	2.818	3.162	2.512	2.818	2.239	2.512
sub8	2015-06-15	47	1.5	0.48	36	2.217	1.585	2.239	1.995	2.512	1.778	2.512	1.995	2.512	1.995	2.512
sub8	2015-06-15	47	1.5	0.48	126	3.846	5.012	7.079	3.981	5.012	3.548	3.981	3.548	4.467	3.548	3.981
sub8	2015-06-15	47	1.5	0.48	126	2.78	3.162	3.981	2.239	2.818	2.512	3.162	2.512	3.162	2.512	2.818
sub8	2015-06-15	47	1.5	0.48	126	2.35	2.512	3.548	2.512	2.818	2.239	2.512	2.239	2.818	1.778	2.512
sub8	2015-06-15	47	1.5	0.48	126	2.396	5.012	6.31	1.995	2.239	1.995	2.239	1.995	2.818	2.512	2.818
sub8	2015-06-15	47	1.5	0.48	126	2.529	3.162	3.981	3.162	3.981	2.512	3.162	2.239	2.512	2.239	2.512
sub8	2015-06-15	47	1.5	0.48	126	1.538	2.512	3.162	1.259	1.585	1.413	1.585	1.259	1.778	1.413	1.778
sub8	2015-06-16	47	1.5	0.48	126	2.894	7.943	3.162	3.981	2.818	3.162	2.818	3.162	2.818	3.162	2.239
sub8	2015-06-16	47	1.5	0.48	126	3.224	2.512	3.162	2.818	3.981	3.162	3.981	3.162	3.981	2.239	2.818
sub8	2015-06-16	47	1.5	0.48	126	2.058	3.162	3.981	2.818	3.162	1.778	2.239	1.585	2.239	1.995	2.512
sub8	2015-06-16	47	1.5	0.48	126	0.808	1	1.995	1.585	1.778	1.122	1.585	0.562	0.631	0.447	0.501
sub8	2015-06-16	47	1.5	0.48	126	2.233	10	4.467	5.012	2.818	3.162	2.818	3.162	1.413	1.585	1.259
sub8	2015-06-16	47	1.5	0.48	126	3.678	3.162	3.981	3.548	3.981	3.548	5.012	3.548	3.981	2.818	3.162
sub8	2015-06-16	47	1.5	0.48	126	2.446	2.512	3.162	2.818	3.162	2.512	2.818	2.512	2.818	1.778	2.239
sub8	2015-06-16	47	1.5	0.48	126	1.859	2.512	3.162	2.239	2.512	1.778	1.995	1.778	2.239	1.585	1.778
sub8	2015-06-16	47	1.5	0.48	126	1.493	2.512	3.162	1.778	2.239	1.585	1.995	1.413	1.585	1.122	1.259
sub8	2015-06-16	47	1.5	0.48	126	2.34	5.012	6.31	1.995	2.512	2.239	2.512	2.239	2.818	1.995	2.239
sub8	2015-06-17	47	1.5	0.48	126	1.348	1.995	2.512	1	1.259	1.122	1.585	1.413	1.585	1.122	1.259
sub8	2015-06-17	47	1.5	0.48	126	1.804	2.512	3.162	1.778	1.995	1.585	1.778	1.585	1.778	1.585	2.512
sub8	2015-06-17	47	1.5	0.48	126	1.048	1.995	2.512	2.239	2.512	1.122	1.259	0.891	1	0.891	1.122
sub8	2015-06-17	47	1.5	0.48	126	0.72	0.794	1	0.891	1	0.631	0.794	0.501	0.794	0.708	0.891
sub8	2015-06-17	47	1.5	0.48	126	2.049	5.012	6.31	3.162	3.548	2.239	2.512	1.995	2.512	1.259	1.778
sub8	2015-06-17	47	1.5	0.48	126	1.38	1.585	2.512	1.778	1.995	1.585	1.778	1.122	1.259	1.122	1.413
sub8	2015-06-17	47	1.5	0.48	126	0.793	0.794	1	0.708	0.891	0.708	1.122	0.708	0.794	0.631	0.794
sub8	2015-06-17	47	1.5	0.48	126	3.004	5.012	6.31	3.981	4.467	2.818	3.162	2.512	3.162	2.818	3.548
sub8	2015-06-17	47	1.5	0.48	126	1.177	1.259	1.778	1.585	1.778	1.413	1.585	1.122	1.259	0.794	0.891
sub8	2015-06-17	47	1.5	0.48	126	0.821	1	1.259	0.794	0.891	0.794	1	0.794	1	0.631	0.708
sub8	2015-06-18	47	1.5	0.48	126	2.398	1.995	2.512	2.239	2.818	2.239	3.162	2.239	2.512	1.995	2.239
sub8	2015-06-18	47	1.5	0.48	126	2.155	1.585	2.239	1.995	2.239	1.995	2.818	2.239	2.512	1.585	1.778
sub8	2015-06-18	47	1.5	0.48	126	1.936	1.585	2.239	1.778	1.995	1.585	2.239	1.778	2.239	1.778	1.995
sub8	2015-06-18	47	1.5	0.48	126	1.428	1.259	1.585	1.413	1.585	1.122	1.778	1.413	1.585	1.259	1.413
sub8	2015-06-18	47	1.5	0.48	126	1.325	1.585	1.995	1.778	1.995	1.413	1.778	1.122	1.259	1.122	1.259
sub8	2015-06-18	47	1.5	0.48	126	2.345	2.512	3.162	2.512	2.818	2.512	2.818	1.995	2.512	1.995	2.239
sub8	2015-06-18	47	1.5	0.48	126	1.08	1.995	2.512	1.995	2.239	1.122	1.413	0.794	1	0.891	1.259
sub8	2015-06-18	47	1.5	0.48	126	0.901	1.585	1.995	1	1.122	1	1.122	0.708	0.891	0.794	0.891
sub8	2015-06-18	47	1.5	0.48	126	1.244	1.585	1.995	1.778	1.995	1.413	1.778	1.122	1.259	0.891	1
sub8	2015-06-18	47	1.5	0.48	126	1.664	1.259	1.585	1.413	1.995	1.585	1.995	1.413	1.585	1.413	1.995
sub8	2015-06-19	47	1.5	0.48	126	0.761	0.398	0.501	0.447	0.631	0.562	0.631	0.562	0.891	0.794	1.122
sub8	2015-06-19	47	1.5	0.48	126	1.264	2.512	3.162	1.259	1.413	1.259	1.413	1.122	1.259	1.122	1.413
sub8	2015-06-19	47	1.5	0.48	126	1.743	1.995	2.512	2.239	2.512	2.239	2.512	1.259	1.778	1.259	1.413
sub8	2015-06-19	47	1.5	0.48	126	1.23	1.995	2.512	1.585	1.778	1	1.122	1	1.585	1.259	1.413
sub8	2015-06-19	47	1.5	0.48	126	1.239	1	1.995	1.259	1.585	1.259	1.413	1.122	1.259	1.122	1.259
sub8	2015-06-19	47	1.5	0.48	126	2.008	2.512	3.162	2.818	3.162	1.995	2.239	1.995	2.818	1.413	1.585
sub8	2015-06-19	47	1.5	0.48	126	0.624	2.512	3.162	1	1.122	0.631	0.708	0.631	0.708	0.501	0.562
sub8	2015-06-19	47	1.5	0.48	126	1.592	1.585	2.512	1.585	1.778	1.413	1.585	1.413	1.778	1.585	1.778
sub8	2015-06-19	47	1.5	0.48	126	0.592	0.501	0.631	0.501	0.562	0.501	0.562	0.501	0.794	0.562	0.631
sub8	2015-06-19	47	1.5	0.48	126	1.554	1.585	1.995	1.585	1.995	1.585	1.778	1.585	1.995	1.122	1.259
sub8	2015-06-20	47	1.5	0.48	126	0.451	0.794	1.122	1	1.122	0.398	0.501	0.398	0.447	0.398	0.562
sub8	2015-06-20	47	1.5	0.48	126	1.598	1.259	1.778	1	1.995	1.778	2.239	1.413	1.778	1.122	1.259
sub8	2015-06-20	47	1.5	0.48	126	0.949	1.995	2.818	1.259	1.413	1.259	1.413	0.891	1	0.501	0.631
sub8	2015-06-20	47	1.5	0.48	126	0.83	1.259	1.585	1.413	1.778	0.794	0.891	0.794	1	0.708	0.794
sub8	2015-06-20	47	1.5	0.48	126	1.606	1.995	2.818	1.995	2.512	1.778	1.995	1.413	1.778	1.259	1.413
sub8	2015-06-20	47	1.5	0.48	126	1.029	1.995	2.512	1.995	2.239	1.259	1.413	0.708	1	0.794	1
sub8	2015-06-20	47	1.5	0.48	126	0.993	1	1.259	1.122	1.259	1.122	1.259	0.891	1	0.794	0.891
sub8	2015-06-20	47	1.5	0.48	126	2.523	2.512	3.162	2.512	2.818	2.512	2.818	2.239	2.818	2.239	2.512
sub8	2015-06-20	47	1.5	0.48	126	0.658	0.631	0.891	0.631	0.794	0.631	0.708	0.631	0.708	0.562	0.708
sub8	2015-06-20	47	1.5	0.48	126	0.534	0.794	1.259	0.447	0.631	0.447	0.631	0.501	0.562	0.501	0.562
sub8	2015-06-21	47	1.5	0.48	36	0.727	1	1.259	1	1.122	0.794	0.891	0.631	0.708	0.631	0.708
sub8	2015-06-21	47	1.5	0.48	36	2.888	2.512	3.162	2.512	3.162	2.512	3.162	2.512	3.162	2.818	3.162
sub8	2015-06-21	47	1.5	0.48	36	1.602	0.794	1.995	1.585	1.778	1.259	1.585	1.413	1.778	1.585	1.995
sub8	2015-06-21	47	1.5	0.48	36	1.663	1.585	1.995	1.585	2.239	1.585	1.995	1.585	1.778	1.259	1.778
sub8	2015-06-21	47	1.5	0.48	36	3.573	5.012	6.31	4.467	5.012	4.467	5.012	2.818	3.162	2.818	3.162
sub8	2015-06-21	47	1.5	0.48	126	1.274	3.162	3.981	2.239	2.512	1.585	1.995	1.122	1.259	0.794	0.891
sub8	2015-06-21	47	1.5	0.48	126	1.039	1	1.259	1	1.122	0.891	1.122	0.891	1.122	0.794	1.413
sub8	2015-06-21	47	1.5	0.48	126	1.266	1.585	1.995	1.585	1.778	1.585	1.995	1	1.122	0.891	1
sub8	2015-06-21	47	1.5	0.48	126	0.523	0.501	0.631	0.562	0.708	0.562	0.631	0.251	0.631	0.501	0.562
sub8	2015-06-21	47	1.5	0.48	126	2.907	3.162	3.981	2.818	3.548	3.162	3.548	2.818	3.162	2.239	2.512
sub9	2016-05-04	47	1.5	0.48	36	6.047	3.981	5.012	3.162	5.623	5.012	5.623	5.012	5.623	5.012	10
sub9	2016-05-04	47	1.5	0.48	36	3.201	2.818	3.548	2.818	3.981	3.162	3.548	3.162	3.548	2.239	3.548
sub9	2016-05-04	47	1.5	0.48	36	3.817	3.548	5.623	3.548	5.012	4.467	5.012	3.162	3.548	3.162	3.548
sub9	2016-05-04	47	1.5	0.48	36	4.034	7.079	3.548	5.012	3.548	4.467	3.162	4.467	3.548	5.012	3.548
sub9	2016-05-04	47	1.5	0.48	36	4.727	7.079	5.623	7.079	6.31	7.079	5.012	6.31	3.162	3.981	2.818
sub9	2016-05-04	47	1.5	0.48	36	3.587	7.079	2.239	3.162	2.512	3.162	2.818	3.981	3.548	4.467	3.548
sub9	2016-05-04	47	1.5	0.48	126	4.872	4.467	5.623	3.981	4.467	3.981	5.012	3.981	5.623	5.012	5.623
sub9	2016-05-04	47	1.5	0.48	126	3.125	2.818	3.548	2.818	3.162	2.818	3.162	2.512	3.548	3.162	3.548
sub9	2016-05-04	47	1.5	0.48	126	4.607	4.467	5.623	3.548	4.467	3.548	5.012	4.467	5.012	3.981	5.623
sub9	2016-05-04	47	1.5	0.48	126	3.587	4.467	8.913	5.012	5.623	3.162	3.548	2.818	4.467	3.548	3.981
sub9	2016-05-04	47	1.5	0.48	126	3.248	7.079	1.122	3.548	2.818	3.162	2.818	3.548	3.162	3.981	2.818
sub9	2016-05-05	47	1.5	0.48	36	2.871	3.162	3.981	2.512	2.818	2.512	3.162	2.239	2.818	2.512	3.981
sub9	2016-05-05	47	1.5	0.48	36	5.362	3.981	6.31	5.012	6.31	5.623	6.31	5.012	5.623	3.981	5.623
sub9	2016-05-05	47	1.5	0.48	36	3.617	5.012	6.31	2.818	3.548	2.512	3.548	3.162	4.467	3.548	4.467
sub9	2016-05-05	47	1.5	0.48	36	5.148	3.162	3.981	3.162	5.012	4.467	5.012	4.467	5.623	5.012	6.31
sub9	2016-05-05	47	1.5	0.48	36	3.643	5.012	6.31	3.981	4.467	3.548	3.981	3.548	3.981	2.818	3.981
sub9	2016-05-05	47	1.5	0.48	36	3.374	7.943	5.012	6.31	5.623	6.31	2.818	3.548	2.512	2.818	2.239
sub9	2016-05-05	47	1.5	0.48	36	3.491	1.995	2.512	1.995	2.818	2.239	3.548	3.162	4.467	3.548	3.981
sub9	2016-05-05	47	1.5	0.48	36	3.175	1.995	3.981	3.162	3.981	3.548	4.467	2.818	3.162	2.239	2.818
sub9	2016-05-05	47	1.5	0.48	36	2.562	1.995	2.512	1.995	2.512	1.995	2.239	1.995	3.162	2.818	3.162
sub9	2016-05-05	47	1.5	0.48	36	1.718	1.995	2.512	1.585	1.778	1.585	1.778	1.585	1.995	1.585	1.778
sub9	2016-05-06	47	1.5	0.48	36	2.982	5.012	6.31	4.467	5.012	2.818	3.548	2.818	3.162	1.995	3.548
sub9	2016-05-06	47	1.5	0.48	36	4.505	2.512	3.981	3.162	4.467	3.548	5.012	3.981	5.012	4.467	5.012
sub9	2016-05-06	47	1.5	0.48	36	2.939	3.981	5.012	1.995	2.818	2.512	3.162	2.818	3.162	2.818	3.162
sub9	2016-05-06	47	1.5	0.48	36	2.386	6.31	7.943	3.162	3.548	2.239	2.512	1.995	2.818	2.239	2.512
sub9	2016-05-06	47	1.5	0.48	36	2.648	1.995	2.512	1.995	2.239	1.995	3.162	2.239	2.818	2.512	3.162
sub9	2016-05-06	47	1.5	0.48	36	2.574	1.995	3.162	2.512	2.818	2.512	2.818	2.239	2.818	2.239	2.818
sub9	2016-05-06	47	1.5	0.48	36	4.006	3.981	6.31	4.467	5.623	4.467	5.623	3.162	3.981	2.818	3.981
sub9	2016-05-06	47	1.5	0.48	36	2.62	2.512	3.162	2.512	2.818	2.512	2.818	2.512	2.818	2.239	2.818
sub9	2016-05-06	47	1.5	0.48	36	2.417	3.162	3.981	2.818	3.162	1.778	2.239	1.995	2.818	2.512	3.162
sub9	2016-05-06	47	1.5	0.48	36	2.523	12.589	2.512	3.548	2.512	2.818	2.512	2.818	2.239	2.512	2.239
sub9	2016-05-07	47	1.5	0.48	36	3.383	3.162	5.012	3.981	4.467	3.548	3.981	2.512	3.548	3.162	3.548
sub9	2016-05-07	47	1.5	0.48	36	2.231	1.585	1.995	1.585	1.995	1.585	2.239	1.995	2.512	2.239	2.818
sub9	2016-05-07	47	1.5	0.48	36	2.939	3.981	5.012	3.162	4.467	2.512	3.162	2.818	3.162	2.818	3.162
sub9	2016-05-07	47	1.5	0.48	36	3.865	6.31	7.943	5.012	5.623	4.467	5.012	4.467	5.012	1.995	2.239
sub9	2016-05-07	47	1.5	0.48	36	5.024	10	6.31	7.943	6.31	7.943	5.012	5.623	3.548	4.467	3.548
sub9	2016-05-07	47	1.5	0.48	36	3.003	3.981	5.012	3.548	3.981	3.548	3.981	2.512	2.818	1.995	3.162
sub9	2016-05-07	47	1.5	0.48	36	1.642	1	1.585	1.259	1.413	1.259	1.778	1.413	1.585	1	2.818
sub9	2016-05-07	47	1.5	0.48	36	2.208	1.995	2.512	1.778	2.239	1.995	2.239	1.995	2.512	1.995	2.512
sub9	2016-05-07	47	1.5	0.48	36	3.119	5.012	6.31	3.981	4.467	2.818	3.162	2.818	3.548	2.818	3.548
sub9	2016-05-07	47	1.5	0.48	36	2.863	2.512	3.981	2.239	2.818	2.239	2.818	2.512	3.548	2.512	3.548
sub9	2016-05-08	47	1.5	0.48	36	4.55	10	5.012	6.31	5.623	6.31	3.981	5.012	3.981	4.467	3.548
sub9	2016-05-08	47	1.5	0.48	36	3.14	3.162	3.981	3.162	4.467	3.548	3.981	2.818	3.162	2.512	2.818
sub9	2016-05-08	47	1.5	0.48	36	3.068	5.012	6.31	2.818	3.162	2.512	3.548	2.818	3.548	2.818	3.162
sub9	2016-05-08	47	1.5	0.48	36	3.88	3.981	5.012	2.818	3.981	3.548	6.31	3.162	3.548	3.162	3.548
sub9	2016-05-08	47	1.5	0.48	36	4.645	5.012	6.31	5.012	5.623	4.467	5.623	5.012	5.623	3.162	3.981
sub9	2016-05-08	47	1.5	0.48	36	3.402	3.981	5.012	3.981	4.467	2.818	3.162	2.818	3.981	3.162	4.467
sub9	2016-05-08	47	1.5	0.48	36	2.753	2.512	3.162	2.512	2.818	2.239	2.512	2.239	3.548	2.818	3.162
sub9	2016-05-08	47	1.5	0.48	36	3.043	1.585	2.512	1.995	2.818	2.512	2.818	2.239	3.548	3.162	3.981
sub9	2016-05-08	47	1.5	0.48	36	4.09	3.162	3.981	3.162	4.467	3.981	4.467	3.548	3.981	3.548	5.012
sub9	2016-05-08	47	1.5	0.48	36	2.407	10	1.995	3.162	2.818	3.162	2.239	2.512	2.239	2.512	1.778
sub9	2016-05-09	47	1.5	0.48	36	3.934	5.012	6.31	4.467	5.012	3.981	4.467	3.548	3.981	3.162	4.467
sub9	2016-05-09	47	1.5	0.48	36	3.427	3.981	6.31	3.981	4.467	3.162	3.548	3.162	3.548	3.162	3.981
sub9	2016-05-09	47	1.5	0.48	36	3.765	5.012	7.943	3.548	3.981	3.548	3.981	3.548	3.981	3.548	3.981
sub9	2016-05-09	47	1.5	0.48	36	2.575	3.162	5.012	3.981	4.467	3.162	3.548	1.995	2.239	1.995	2.512
sub9	2016-05-09	47	1.5	0.48	36	2.507	2.512	3.162	2.239	2.818	2.239	2.512	1.995	2.512	2.239	3.548
sub9	2016-05-09	47	1.5	0.48	36	2.849	2.512	3.162	2.512	2.818	2.239	2.818	2.239	2.818	2.512	4.467
sub9	2016-05-09	47	1.5	0.48	36	3.66	3.981	5.012	3.548	3.981	3.162	3.981	2.818	4.467	3.548	3.981
sub9	2016-05-09	47	1.5	0.48	36	3.061	3.162	3.981	3.162	3.548	3.162	3.548	2.818	3.162	2.512	3.162
sub9	2016-05-09	47	1.5	0.48	36	2.813	12.589	3.162	4.467	3.162	3.981	2.239	2.818	2.512	2.818	2.512
sub9	2016-05-09	47	1.5	0.48	36	2.395	3.162	3.981	2.818	3.981	2.512	2.818	1.778	2.512	2.239	2.512
sub9	2016-05-10	47	1.5	0.48	36	3.197	3.981	6.31	4.467	5.623	2.818	3.162	2.512	3.548	3.162	3.981
sub9	2016-05-10	47	1.5	0.48	36	2.952	3.162	3.981	3.162	3.548	3.162	3.548	2.512	3.162	2.512	2.818
sub9	2016-05-10	47	1.5	0.48	36	3.125	5.012	6.31	3.548	3.981	2.818	3.162	2.512	3.548	3.162	3.548
sub9	2016-05-10	47	1.5	0.48	36	3.507	3.981	5.012	2.818	3.162	2.818	3.981	3.548	3.981	3.162	3.548
sub9	2016-05-10	47	1.5	0.48	36	2.299	6.31	7.943	1.995	2.512	1.778	2.512	2.239	2.512	2.239	2.512
sub9	2016-05-10	47	1.5	0.48	126	3.068	3.981	5.012	3.548	3.981	2.818	3.548	2.512	3.162	2.818	3.548
sub9	2016-05-10	47	1.5	0.48	126	2.252	1.995	2.512	1.778	1.995	1.585	3.162	2.239	2.512	1.778	2.239
sub9	2016-05-10	47	1.5	0.48	126	1.936	1.995	2.512	1.778	1.995	1.778	2.239	1.585	1.995	1.778	2.239
sub9	2016-05-10	47	1.5	0.48	126	2.222	5.012	6.31	2.512	2.818	1.778	1.995	1.778	2.239	1.995	3.548
sub9	2016-05-10	47	1.5	0.48	126	2.407	10	3.981	5.012	3.548	3.981	1.995	2.239	1.995	2.239	1.995
sub9	2016-05-10	47	1.5	0.48	126	3.441	10	5.012	6.31	4.467	5.012	3.162	3.981	2.512	3.162	2.818
sub10	2016-05-04	47	1.5	0.48	36	9.011	4.467	7.079	5.623	10	8.913	10	8.913	11.22	7.079	7.943
sub10	2016-05-04	47	1.5	0.48	36	5.827	2.818	5.623	4.467	5.623	5.012	7.079	6.31	7.079	4.467	5.012
sub10	2016-05-04	47	1.5	0.48	36	4.08	4.467	5.623	3.162	4.467	3.548	4.467	3.548	4.467	3.981	4.467
sub10	2016-05-04	47	1.5	0.48	36	4.396	4.467	7.079	5.623	6.31	4.467	5.012	3.981	4.467	3.981	4.467
sub10	2016-05-04	47	1.5	0.48	36	4.487	2.818	4.467	3.548	4.467	3.981	4.467	3.981	5.012	4.467	5.012
sub10	2016-05-04	47	1.5	0.48	36	5.456	3.548	5.623	4.467	5.623	5.012	6.31	5.623	6.31	4.467	5.012
sub10	2016-05-04	47	1.5	0.48	126	5.456	5.623	7.079	3.162	3.548	2.818	3.162	2.818	7.943	7.079	8.913
sub10	2016-05-04	47	1.5	0.48	126	5.034	3.548	7.079	5.623	6.31	5.012	5.623	4.467	5.623	4.467	5.012
sub10	2016-05-04	47	1.5	0.48	126	4.628	7.079	4.467	5.623	3.548	3.981	3.548	5.623	5.012	5.623	3.981
sub10	2016-05-04	47	1.5	0.48	126	4.452	4.467	5.623	3.548	3.981	3.162	5.012	4.467	5.623	3.981	4.467
sub10	2016-05-04	47	1.5	0.48	126	4.197	7.079	2.818	3.548	3.162	3.548	3.162	5.012	4.467	5.012	3.981
sub10	2016-05-04	47	1.5	0.48	126	5.727	7.079	4.467	5.623	5.012	7.079	6.31	7.943	4.467	5.012	3.548
sub10	2016-05-05	47	1.5	0.48	126	3.936	7.943	5.012	6.31	4.467	5.012	3.548	3.981	3.548	3.981	3.548
sub10	2016-05-05	47	1.5	0.48	126	3.752	3.981	5.012	2.818	3.548	3.162	5.012	3.162	3.548	3.162	4.467
sub10	2016-05-05	47	1.5	0.48	126	4.568	7.943	5.012	6.31	3.548	4.467	3.981	5.012	4.467	5.012	4.467
sub10	2016-05-05	47	1.5	0.48	126	4.938	3.981	5.012	3.162	3.981	3.548	4.467	3.981	6.31	5.012	6.31
sub10	2016-05-05	47	1.5	0.48	126	4.243	3.162	5.012	3.981	4.467	3.548	4.467	3.981	4.467	3.981	5.012
sub10	2016-05-05	47	1.5	0.48	126	4.044	7.943	3.162	3.981	2.239	3.548	3.162	5.012	3.981	5.012	3.548
sub10	2016-05-05	47	1.5	0.48	126	5.058	5.012	7.943	5.012	5.623	4.467	6.31	4.467	5.012	4.467	5.623
sub10	2016-05-05	47	1.5	0.48	126	4.881	3.981	5.012	3.548	3.981	3.548	5.623	5.012	5.623	4.467	5.012
sub10	2016-05-05	47	1.5	0.48	126	4.739	5.012	6.31	4.467	5.012	4.467	5.012	4.467	5.012	4.467	5.012
sub10	2016-05-05	47	1.5	0.48	126	4.049	3.162	5.012	2.818	3.548	2.818	4.467	3.548	5.012	3.981	4.467
sub10	2016-05-06	47	1.5	0.48	126	3.999	3.981	5.012	3.981	5.012	3.981	4.467	3.548	3.981	3.548	4.467
sub10	2016-05-06	47	1.5	0.48	126	3.248	3.981	5.012	3.981	4.467	3.548	3.981	2.818	3.162	2.818	3.162
sub10	2016-05-06	47	1.5	0.48	126	4.516	7.943	3.981	5.012	3.548	3.981	3.548	5.623	4.467	5.012	4.467
sub10	2016-05-06	47	1.5	0.48	126	2.831	2.512	3.981	2.818	3.548	2.512	2.818	2.512	3.162	2.818	3.162
sub10	2016-05-06	47	1.5	0.48	126	4.133	2.512	3.981	3.162	3.548	2.512	3.981	3.548	4.467	3.981	6.31
sub10	2016-05-06	47	1.5	0.48	126	5.774	3.981	6.31	5.012	6.31	4.467	6.31	5.623	6.31	5.623	6.31
sub10	2016-05-06	47	1.5	0.48	126	2.773	3.981	5.012	3.162	3.548	1.995	2.818	2.512	2.818	2.512	3.981
sub10	2016-05-06	47	1.5	0.48	126	3.643	3.162	5.012	3.162	5.623	3.548	3.981	2.818	3.981	3.548	3.981
sub10	2016-05-06	47	1.5	0.48	126	4.645	5.012	6.31	3.548	4.467	3.981	4.467	3.162	5.623	5.012	5.623
sub10	2016-05-06	47	1.5	0.48	126	3.242	7.943	3.981	5.623	3.548	4.467	3.162	3.981	2.512	2.818	2.512
sub10	2016-05-07	47	1.5	0.48	126	3.974	3.162	3.981	3.162	3.548	3.162	5.623	3.548	3.981	3.548	3.981
sub10	2016-05-07	47	1.5	0.48	126	5.556	3.162	6.31	3.981	5.623	3.981	6.31	4.467	5.623	5.012	7.943
sub10	2016-05-07	47	1.5	0.48	126	4.025	5.012	6.31	4.467	5.623	4.467	5.012	3.548	3.981	3.162	3.981
sub10	2016-05-07	47	1.5	0.48	126	5.096	3.162	3.981	3.162	3.981	3.548	4.467	3.981	5.623	5.012	7.943
sub10	2016-05-07	47	1.5	0.48	126	4.76	5.012	7.943	5.012	5.623	4.467	5.012	4.467	5.623	3.981	5.012
sub10	2016-05-07	47	1.5	0.48	126	4.67	5.012	6.31	3.981	4.467	3.548	3.981	3.548	5.623	5.012	6.31
sub10	2016-05-07	47	1.5	0.48	126	3.974	3.162	6.31	3.981	4.467	3.162	3.981	3.548	3.981	3.548	5.623
sub10	2016-05-07	47	1.5	0.48	126	5.648	1.585	6.31	5.012	6.31	5.623	6.31	5.012	6.31	5.012	5.623
sub10	2016-05-07	47	1.5	0.48	126	4.191	3.162	5.012	3.548	3.981	3.548	3.981	3.548	4.467	3.981	5.623
sub10	2016-05-07	47	1.5	0.48	126	3.78	7.943	3.981	5.623	4.467	5.012	3.981	4.467	3.162	3.548	2.512
sub10	2016-05-08	47	1.5	0.48	126	2.946	3.548	4.467	2.818	3.548	2.818	3.162	2.818	3.548	2.512	2.818
sub10	2016-05-08	47	1.5	0.48	126	5.131	2.818	7.079	5.012	5.623	5.012	6.31	5.623	6.31	3.548	3.981
sub10	2016-05-08	47	1.5	0.48	126	4.049	7.079	4.467	5.623	4.467	5.012	3.548	4.467	2.818	4.467	3.981
sub10	2016-05-08	47	1.5	0.48	126	3.492	7.079	4.467	6.31	5.623	6.31	2.818	3.981	2.512	2.818	2.512
sub10	2016-05-08	47	1.5	0.48	126	2.809	2.818	3.548	2.239	4.467	2.818	3.162	1.995	2.818	2.512	3.548
sub10	2016-05-08	47	1.5	0.48	126	3.355	7.079	2.818	3.981	3.162	3.548	3.162	3.548	3.162	3.548	3.162
sub10	2016-05-08	47	1.5	0.48	126	4.35	4.467	5.623	4.467	5.012	4.467	5.012	3.981	4.467	3.162	5.012
sub10	2016-05-08	47	1.5	0.48	126	4.333	4.467	5.623	3.981	5.012	3.981	5.012	3.548	4.467	3.981	5.012
sub10	2016-05-08	47	1.5	0.48	126	4.144	7.079	3.548	4.467	3.981	5.623	3.981	4.467	3.162	4.467	3.162
sub10	2016-05-08	47	1.5	0.48	126	4.22	4.467	5.623	4.467	5.623	5.012	6.31	3.162	3.548	2.818	4.467
sub10	2016-05-09	47	1.5	0.48	126	2.676	7.079	2.239	3.162	1.995	2.512	1.995	2.239	1.778	3.981	3.548
sub10	2016-05-09	47	1.5	0.48	126	3.724	7.079	3.548	4.467	3.981	4.467	3.548	3.981	3.548	3.981	2.818
sub10	2016-05-09	47	1.5	0.48	126	4.243	4.467	5.623	3.548	3.981	3.548	4.467	3.981	4.467	3.981	5.012
sub10	2016-05-09	47	1.5	0.48	126	3.451	3.548	4.467	3.548	3.981	3.162	3.548	2.818	3.548	3.162	4.467
sub10	2016-05-09	47	1.5	0.48	126	3.237	3.548	4.467	2.818	3.162	2.239	3.162	2.512	3.981	3.548	3.981
sub10	2016-05-09	47	1.5	0.48	126	2.981	1.778	2.818	2.239	2.512	1.995	2.818	2.239	3.548	2.818	4.467
sub10	2016-05-09	47	1.5	0.48	126	4.37	4.467	5.623	4.467	5.623	3.981	4.467	3.548	7.079	3.162	3.981
sub10	2016-05-09	47	1.5	0.48	126	5.034	4.467	5.623	4.467	5.012	4.467	5.623	5.012	5.623	4.467	5.012
sub10	2016-05-09	47	1.5	0.48	126	3.645	3.548	4.467	3.162	3.548	3.162	4.467	3.548	3.981	3.162	3.548
sub10	2016-05-09	47	1.5	0.48	126	4.087	4.467	5.623	4.467	5.012	3.981	4.467	3.981	4.467	3.162	4.467
sub10	2016-05-10	47	1.5	0.48	36	4.658	2.512	6.31	3.162	5.012	4.467	5.012	3.981	5.012	4.467	5.012
sub10	2016-05-10	47	1.5	0.48	36	4.781	5.012	7.943	6.31	7.079	5.012	5.623	3.981	5.623	3.981	4.467
sub10	2016-05-10	47	1.5	0.48	36	6.622	6.31	10	7.079	7.943	7.079	7.943	6.31	7.079	5.012	6.31
sub10	2016-05-10	47	1.5	0.48	36	3.659	3.162	3.981	3.162	3.548	2.818	3.162	2.818	3.981	3.548	5.623
sub10	2016-05-10	47	1.5	0.48	36	4.007	5.012	6.31	3.162	5.012	3.981	4.467	3.981	4.467	3.162	3.981
sub10	2016-05-10	47	1.5	0.48	36	3.65	2.512	3.981	3.162	3.548	2.512	3.548	3.162	3.548	2.818	6.31
sub10	2016-05-10	47	1.5	0.48	126	4.243	5.012	6.31	5.012	5.623	4.467	5.012	3.981	4.467	3.548	3.981
sub10	2016-05-10	47	1.5	0.48	126	3.508	2.512	3.981	3.162	3.548	3.162	3.548	3.162	3.548	3.162	4.467
sub10	2016-05-10	47	1.5	0.48	126	3.319	2.512	3.162	2.512	4.467	3.162	3.548	3.162	3.548	2.512	3.981
sub10	2016-05-10	47	1.5	0.48	126	4.822	10	6.31	7.943	5.623	6.31	5.623	6.31	3.548	3.981	3.162
sub10	2016-05-10	47	1.5	0.48	126	3.293	3.162	3.981	3.162	4.467	3.981	4.467	2.818	3.162	2.512	2.818
sub10	2016-05-10	47	1.5	0.48	126	2.477	3.162	3.981	2.239	2.512	2.239	2.512	2.239	2.818	2.239	2.818

## Sheet: Raw_Fig2c
ID	date	contrast	spatial frequency (c/d)	standard deviation (deg)	orientation (deg)	threshold	preliminary reversals				experimental reversals
sub1	2015-06-16	47	1.5	0.48	36	3.152	3.981	6.31	4.467	5.012	3.548	3.981	2.818	3.162	2.239	3.162
sub1	2015-06-16	47	1.5	0.48	36	2.482	1.995	2.818	1.995	2.239	1.995	2.512	2.239	2.818	2.512	2.818
sub1	2015-06-16	47	1.5	0.48	36	2.979	3.981	5.012	3.162	3.548	3.162	3.981	2.512	2.818	2.239	3.162
sub1	2015-06-16	47	1.5	0.48	36	2.634	3.981	5.623	5.012	5.623	3.981	4.467	1.778	1.995	1.585	1.995
sub1	2015-06-16	47	1.5	0.48	36	2.334	3.981	5.012	2.818	3.548	2.512	2.818	2.512	3.162	1.413	1.585
sub1	2015-06-16	47	1.5	0.48	36	2.4	3.162	3.981	3.162	3.548	2.818	3.162	2.239	2.818	1.585	1.778
sub1	2015-06-21	47	1.5	0.48	36	3.645	3.981	6.31	3.981	5.012	3.981	4.467	3.162	3.548	3.162	3.548
sub1	2015-06-21	47	1.5	0.48	36	1.858	1.585	2.239	1.585	1.778	1.585	2.512	1.778	2.239	1.259	1.778
sub1	2015-06-21	47	1.5	0.48	36	4.823	3.162	3.981	3.548	4.467	3.548	4.467	3.981	5.623	5.012	6.31
sub1	2015-06-21	47	1.5	0.48	36	1.881	1.995	2.512	1.585	1.778	1.585	1.778	1.585	2.239	1.585	2.512
sub1	2015-06-21	47	1.5	0.48	36	3.385	3.981	5.012	3.548	3.981	3.548	3.981	2.818	3.162	2.818	3.981
sub2	2015-06-16	47	1.5	0.48	126	3.055	2.512	3.162	2.818	3.162	2.818	3.162	2.818	3.548	2.818	3.162
sub2	2015-06-16	47	1.5	0.48	126	2.952	1.585	2.512	1.995	3.162	2.512	3.162	2.512	3.548	2.818	3.162
sub2	2015-06-16	47	1.5	0.48	126	3.66	2.512	3.162	2.818	3.162	2.818	4.467	3.162	3.981	3.548	3.981
sub2	2015-06-16	47	1.5	0.48	126	2.101	1.995	2.512	2.239	2.512	1.778	1.995	1.778	2.239	1.995	2.818
sub2	2015-06-16	47	1.5	0.48	126	2.99	3.981	5.012	3.548	3.981	2.818	3.162	2.818	3.162	2.818	3.162
sub2	2015-06-16	47	1.5	0.48	126	2.477	2.512	3.162	2.239	2.818	2.239	2.818	2.239	2.512	2.239	2.818
sub2	2015-06-21	47	1.5	0.48	126	2.18	5.012	6.31	2.818	3.162	1.995	2.512	2.239	2.512	1.585	2.239
sub2	2015-06-21	47	1.5	0.48	126	2.958	3.981	5.012	2.818	3.162	2.239	3.548	2.818	3.162	2.818	3.162
sub2	2015-06-21	47	1.5	0.48	126	2.774	2.512	3.162	2.818	4.467	3.162	3.981	2.239	2.512	2.239	2.512
sub2	2015-06-21	47	1.5	0.48	126	1.681	1.259	1.778	1.585	1.995	1.778	2.239	1.585	1.778	1.122	1.585
sub2	2015-06-21	47	1.5	0.48	126	2.99	2.512	3.548	3.162	3.981	2.818	3.162	2.818	3.162	2.818	3.162
sub3	2015-06-18	47	1.5	0.48	36	5.788	5.012	6.31	5.623	6.31	5.623	6.31	5.623	7.079	4.467	5.623
sub3	2015-06-18	47	1.5	0.48	36	2.05	1.995	3.162	1.995	2.512	1.995	2.512	1.778	2.239	1.778	1.995
sub3	2015-06-18	47	1.5	0.48	36	3.764	10	5.623	6.31	4.467	5.012	3.548	3.981	3.548	3.981	2.512
sub3	2015-06-18	47	1.5	0.48	36	1.336	1.259	1.585	1.413	1.585	1.259	1.413	1.259	1.413	1.259	1.413
sub3	2015-06-18	47	1.5	0.48	36	4.015	7.943	4.467	5.012	3.981	4.467	3.548	4.467	3.981	4.467	3.162
sub3	2015-06-18	47	1.5	0.48	36	3.862	3.162	3.981	3.162	3.981	3.548	4.467	3.548	4.467	3.162	3.981
sub3	2015-06-23	47	1.5	0.48	36	3.954	7.943	5.012	6.31	3.981	4.467	3.981	5.623	3.162	3.981	2.512
sub3	2015-06-23	47	1.5	0.48	36	4.348	3.162	3.981	3.548	3.981	3.162	5.623	5.012	6.31	2.818	3.162
sub3	2015-06-23	47	1.5	0.48	36	1.765	3.981	6.31	4.467	5.623	2.239	2.512	1	1.585	1.259	1.995
sub3	2015-06-23	47	1.5	0.48	36	2.535	1	4.467	3.162	3.548	2.239	2.818	2.239	3.162	2.239	2.512
sub3	2015-06-23	47	1.5	0.48	36	3.724	7.943	3.548	4.467	3.548	4.467	3.548	3.981	3.548	3.981	2.818
sub4	2015-06-23	47	1.5	0.48	126	5.56	7.943	6.31	7.079	6.31	7.079	5.012	5.623	5.012	5.623	5.012
sub4	2015-06-23	47	1.5	0.48	126	3.917	3.981	5.012	4.467	5.012	3.981	4.467	3.981	5.012	2.512	3.548
sub4	2015-06-23	47	1.5	0.48	126	3.632	2.512	3.981	2.818	3.162	2.512	4.467	3.981	4.467	2.818	3.548
sub4	2015-06-23	47	1.5	0.48	126	3.572	3.981	5.012	4.467	5.012	3.162	3.981	3.162	3.981	3.162	3.981
sub4	2015-06-23	47	1.5	0.48	126	2.792	7.943	4.467	5.012	3.162	3.548	2.818	3.548	1.778	2.818	2.239
sub4	2015-06-23	47	1.5	0.48	126	2.843	7.943	4.467	5.012	2.512	3.162	2.512	3.162	2.818	3.162	2.239
sub4	2015-06-30	47	1.5	0.48	126	3.125	5.012	6.31	3.548	3.981	3.162	3.548	3.162	3.548	2.512	2.818
sub4	2015-06-30	47	1.5	0.48	126	3.587	3.162	3.981	3.548	5.012	4.467	5.012	3.162	3.548	2.512	2.818
sub4	2015-06-30	47	1.5	0.48	126	3.999	5.012	6.31	3.981	4.467	3.981	4.467	3.548	3.981	3.548	4.467
sub4	2015-06-30	47	1.5	0.48	126	2.081	3.981	5.623	3.162	3.548	1.995	2.239	1.995	2.239	1.778	2.239
sub4	2015-06-30	47	1.5	0.48	126	5.774	5.012	6.31	5.623	7.079	5.623	6.31	5.623	6.31	4.467	6.31
sub5	2015-06-23	47	1.5	0.48	36	3.709	3.162	3.981	2.818	3.162	2.818	3.162	2.818	3.981	3.162	6.31
sub5	2015-06-23	47	1.5	0.48	36	4.587	3.981	5.012	3.981	4.467	2.818	5.623	3.981	5.012	4.467	5.623
sub5	2015-06-23	47	1.5	0.48	36	3.69	10	3.981	4.467	3.981	4.467	3.981	4.467	3.162	3.548	2.512
sub5	2015-06-23	47	1.5	0.48	36	4.1	1.995	2.818	2.512	2.818	2.512	4.467	3.981	4.467	3.548	5.623
sub5	2015-06-23	47	1.5	0.48	36	1.653	1.259	3.162	2.239	2.512	1.585	1.778	1.413	1.778	1.585	1.778
sub5	2015-06-23	47	1.5	0.48	36	3.151	7.943	1.995	2.239	1.778	2.239	1.995	3.981	3.162	3.981	3.548
sub5	2015-06-29	47	1.5	0.48	36	4.281	7.943	6.31	7.079	6.31	7.079	3.548	3.981	3.548	3.981	3.548
sub5	2015-06-29	47	1.5	0.48	36	4.124	7.943	3.162	3.981	3.548	4.467	3.548	5.012	4.467	5.012	2.239
sub5	2015-06-29	47	1.5	0.48	36	3.482	3.981	5.012	3.548	4.467	3.162	4.467	3.981	4.467	1.995	2.818
sub5	2015-06-29	47	1.5	0.48	36	2.62	10	2.512	2.818	2.239	2.818	2.512	2.818	2.512	2.818	2.239
sub5	2015-06-29	47	1.5	0.48	36	2.755	3.162	4.467	3.162	4.467	3.548	4.467	2.818	3.162	1.122	1.413
sub6	2015-06-29	47	1.5	0.48	36	3.478	2.512	8.913	3.162	3.981	3.162	5.012	3.162	3.548	2.818	3.162
sub6	2015-06-29	47	1.5	0.48	36	5.928	7.943	4.467	5.012	3.981	5.012	4.467	7.079	6.31	7.079	5.623
sub6	2015-06-29	47	1.5	0.48	36	5.25	10	3.981	6.31	4.467	5.623	4.467	5.012	4.467	6.31	5.623
sub6	2015-06-29	47	1.5	0.48	36	5.341	5.012	6.31	5.623	7.079	5.012	5.623	5.012	6.31	4.467	5.623
sub6	2015-06-29	47	1.5	0.48	36	5.26	7.943	5.623	6.31	5.623	6.31	5.012	5.623	5.012	5.623	3.981
sub6	2015-06-29	47	1.5	0.48	36	3.363	1.259	3.162	2.818	3.162	2.818	3.162	2.818	3.548	2.818	5.012
sub6	2015-07-03	47	1.5	0.48	36	4.478	7.943	6.31	7.943	5.623	6.31	3.981	4.467	3.548	5.012	3.548
sub6	2015-07-03	47	1.5	0.48	36	4.568	3.162	5.012	3.981	5.012	4.467	5.012	4.467	5.012	3.981	4.467
sub6	2015-07-03	47	1.5	0.48	36	3.523	3.981	5.012	3.548	4.467	3.981	4.467	3.162	3.548	2.818	3.162
sub6	2015-07-03	47	1.5	0.48	36	2.222	3.162	4.467	1.995	2.239	1.995	3.981	1.778	1.995	1.585	1.995
sub6	2015-07-03	47	1.5	0.48	36	2.004	1.585	2.239	1.778	2.512	1.778	1.995	1.778	2.239	1.995	2.239
sub7	2016-04-14	47	1.5	0.48	36	7.818	5.012	7.943	6.31	7.079	6.31	7.079	6.31	8.913	7.079	11.22
sub7	2016-04-14	47	1.5	0.48	36	8.536	25.119	11.22	12.589	6.31	7.079	6.31	10	8.913	10	8.913
sub7	2016-04-14	47	1.5	0.48	36	7.038	12.589	10	12.589	6.31	7.943	6.31	7.943	7.079	7.943	5.012
sub7	2016-04-14	47	1.5	0.48	36	6.061	5.012	7.943	7.079	8.913	7.943	8.913	3.981	4.467	3.981	7.079
sub7	2016-04-14	47	1.5	0.48	36	5.375	5.012	8.913	4.467	5.623	3.981	5.623	5.012	6.31	5.012	6.31
sub7	2016-04-14	47	1.5	0.48	36	4.76	5.012	6.31	3.981	6.31	3.981	5.012	4.467	5.012	4.467	5.623
sub7	2016-04-19	47	1.5	0.48	36	7.302	7.943	6.31	7.943	7.079	7.943	5.623	7.079	6.31	8.913	7.943
sub7	2016-04-19	47	1.5	0.48	36	5.966	5.012	6.31	5.623	8.913	5.623	6.31	5.623	6.31	5.623	6.31
sub7	2016-04-19	47	1.5	0.48	36	5.067	1.585	3.548	2.818	6.31	3.981	6.31	5.012	5.623	4.467	5.012
sub7	2016-04-19	47	1.5	0.48	36	5.432	3.981	5.012	3.981	5.623	5.012	5.623	5.012	5.623	5.012	6.31
sub7	2016-04-19	47	1.5	0.48	36	4.733	5.012	6.31	5.623	6.31	5.623	6.31	3.548	4.467	3.981	4.467
sub8	2016-04-20	47	1.5	0.48	36	3.903	5.012	6.31	3.548	3.981	2.818	3.162	2.818	5.623	3.981	5.012
sub8	2016-04-20	47	1.5	0.48	36	3.355	2.512	3.548	3.162	3.548	3.162	3.548	3.162	3.548	3.162	3.548
sub8	2016-04-20	47	1.5	0.48	36	4.658	3.981	5.012	4.467	6.31	4.467	5.012	3.981	5.012	4.467	5.012
sub8	2016-04-20	47	1.5	0.48	36	2.722	3.162	3.981	2.512	2.818	2.512	2.818	2.512	3.162	2.512	2.818
sub8	2016-04-20	47	1.5	0.48	36	3.37	3.981	5.012	3.548	3.981	3.548	3.981	3.162	3.548	2.818	3.162
sub8	2016-04-20	47	1.5	0.48	36	4.953	5.012	6.31	5.623	6.31	5.012	5.623	5.012	5.623	3.981	4.467
sub8	2016-04-26	47	1.5	0.48	36	3.872	10	3.981	4.467	3.981	5.012	3.548	3.981	3.162	3.981	3.548
sub8	2016-04-26	47	1.5	0.48	36	2.493	7.943	3.981	5.012	3.162	3.981	1.995	2.239	1.995	2.512	2.239
sub8	2016-04-26	47	1.5	0.48	36	2.78	3.162	4.467	2.512	2.818	2.512	2.818	2.512	3.162	2.512	3.162
sub8	2016-04-26	47	1.5	0.48	36	2.99	7.943	3.548	3.981	2.818	3.162	2.818	3.162	2.818	3.162	2.818
sub8	2016-04-26	47	1.5	0.48	36	3.701	3.981	5.012	3.162	3.548	3.162	3.548	3.162	3.548	3.162	5.623
