# Supplementary material for: Bottom-up and top-down influences at untrained conditions determine perceptual learning specificity and transfer
Source: eLife. 2016 Jul 5;5:e14614. doi: 10.7554/eLife.14614 (PMC4965262; doi:10.7554/eLife.14614)
Supplement: Figure 3—source data 1. — The other data sheets contain raw staircase data for 3b and 3c. DOI: http://dx.doi.org/10.7554/eLife.14614.008 [file elife-14614-fig3-data1.xlsx]

## Sheet: Summary_Fig3
Figure 3b
Average(N = 9)
Session	Trained	error	Orthogonal	error	Gabor/C	error
day1	3.89734	0.420334	4.502	0.614445
day2	3.33682	0.327358			0.74777	0.0206416
day3	2.65272	0.280975			0.783592	0.0281454
day4	2.45593	0.288076			0.792584	0.0274166
day5	2.16455	0.302463			0.781701	0.0181989
day6	2.00294	0.299512			0.792858	0.0166145
day7	2.19083	0.354678	2.71639	0.367209
IMP	0.451493	0.0547127	0.389812	0.043301
TI			0.940696	0.120968
Individuals
SUB1	Trained	error	Orthogonal	error		SUB2	Trained	error	Orthogonal	error		SUB3	Trained	error	Orthogonal	error
day1	6.02112	0.144056	7.47119	1.06684		day1	2.85226	0.360933	3.56793	0.171729		day1	2.96023	0.30367	2.39582	0.558493
day2	3.71457	0.257037				day2	2.32304	0.156656				day2	2.27363	0.24664
day3	3.27253	0.326229				day3	1.68258	0.290946				day3	1.90042	0.119327
day4	3.22703	0.222845				day4	1.60966	0.145716				day4	1.81725	0.144685
day5	2.34626	0.16416				day5	1.26132	0.112656				day5	1.49037	0.162389
day6	2.24066	0.167368				day6	1.1959	0.292997				day6	1.40724	0.165502
day7	2.21344	0.257985	3.1872	0.154221		day7	1.0282	0.154122	1.66421	0.207198		day7	1.34612	0.178701	1.50401	0.290787
IMP	0.632388		0.573401			IMP	0.639514		0.533564			IMP	0.545265		0.372236
TI			0.906723			TI			0.834327			TI			0.682669
SUB4	Trained	error	Orthogonal	error		SUB5	Trained	error	Orthogonal	error		SUB6	Trained	error	Orthogonal	error
day1	4.55528	0.367139	4.85712	0.470641		day1	4.89423	0.295083	6.8973	0.85041		day1	2.21728	0.384656	2.36103	0.458626
day2	4.30758	0.215731				day2	4.3929	0.256922				day2	2.74246	0.48044
day3	3.85961	0.242151				day3	3.63554	0.302006				day3	1.53734	0.255139
day4	3.73082	0.149478				day4	3.21217	0.312476				day4	1.59658	0.212938
day5	3.21384	0.243313				day5	3.33858	0.176461				day5	1.07423	0.199043
day6	2.76272	0.225565				day6	3.48855	0.292237				day6	1.00889	0.191636
day7	2.75145	0.261077	3.46118	0.480427		day7	3.75862	0.167832	4.46943	0.392934		day7	1.17148	0.215007	1.125	0.157413
IMP	0.395987		0.287401			IMP	0.23203		0.352003			IMP	0.471657		0.523513
TI			0.725784			TI			1.51705			TI			1.10994
SUB7	Trained	error	Orthogonal	error		SUB8	Trained	error	Orthogonal	error		SUB9	Trained	error	Orthogonal	error
day1	3.72147	0.354299	4.30961	0.372917		day1	2.93759	0.28138	3.20779	0.294875		day1	4.91657	0.631948	5.45023	0.417459
day2	2.88781	0.395551				day2	2.56635	0.19485				day2	4.82301	0.275733
day3	2.73456	0.210324				day3	2.38291	0.173884				day3	2.86899	0.282756
day4	2.83858	0.177055				day4	1.39492	0.173675				day4	2.67636	0.0994153
day5	2.77736	0.20425				day5	1.22188	0.201215				day5	2.75713	0.145461
day6	2.22965	0.16584				day6	0.973681	0.0926572				day6	2.7192	0.21682
day7	2.73021	0.196077	3.34122	0.338851		day7	1.16886	0.117088	2.44464	0.148502		day7	3.54912	0.218744	3.25063	0.274954
IMP	0.266362		0.224704			IMP	0.602102		0.237904			IMP	0.278131		0.403579
TI			0.843605			TI			0.395122			TI			1.45104
Figure 3c
Average(N = 8)
Session	Trained	error	Gabor/C	error
day1	3.34257	0.293471
day2			0.736899	0.0230469
day3			0.73551	0.0106863
day4			0.753467	0.0113219
day5			0.751124	0.0136991
day6			0.758821	0.0131184
day7	2.86614	0.286352
IMP	0.146151	0.0441697
Individuals
SUB1	Trained	error		SUB2	Trained	error		SUB3	Trained	error
day1	4.47312	0.18046		day1	2.1103	0.221184		day1	3.65502	0.306402
day2				day2				day2
day3				day3				day3
day4				day4				day4
day5				day5				day5
day6				day6				day6
day7	3.70401	0.543218		day7	1.74697	0.184528		day7	3.44204	0.434453
IMP	0.17194			IMP	0.172171			IMP	0.0582712
SUB4	Trained	error		SUB5	Trained	error		SUB6	Trained	error
day1	2.54105	0.451801		day1	3.43776	0.470868		day1	4.39923	0.423642
day2				day2				day2
day3				day3				day3
day4				day4				day4
day5				day5				day5
day6				day6				day6
day7	1.58304	0.263408		day7	3.44412	0.532967		day7	3.34747	0.766495
IMP	0.377015			IMP	-0.00184898			IMP	0.239079
SUB7	Trained	error		SUB8	Trained	error
day1	3.10271	0.277024		day1	3.02133	0.193833
day2				day2
day3				day3
day4				day4
day5				day5
day6				day6
day7	3.0441	0.190382		day7	2.61739	0.219172
IMP	0.0188877			IMP	0.133695
Figure 3d
Improvement
	Trained	error	Orthogonal	error
Fig 3b	0.451493	0.0547127	0.389812	0.043301
			Exposed	error
Fig 3c			0.146151	0.0441697
Figure 3e
Transfer index
	TI	err
Fig 1a	0.255222	0.102715
Fig 1f	0.240261	0.243351
Fig 3b	0.940696	0.120968

## Sheet: Raw_Fig3b
ID	date	contrast	spatial frequency (c/d)	standard deviation (deg)	orientation (deg)	threshold	preliminary reversals				experimental reversals
sub1	2012-04-11	47	1.5	0.48	36	5.763	5.012	6.31	5.623	6.31	5.012	5.623	4.467	5.012	4.467	10
sub1	2012-04-11	47	1.5	0.48	36	5.735	7.943	3.162	4.467	3.548	4.467	3.162	7.079	6.31	7.079	6.31
sub1	2012-04-11	47	1.5	0.48	36	6.48	7.943	3.548	5.012	4.467	5.623	4.467	6.31	5.623	8.913	7.943
sub1	2012-04-11	47	1.5	0.48	36	6.145	5.012	6.31	5.623	7.079	4.467	7.079	6.31	7.079	5.623	6.31
sub1	2012-04-11	47	1.5	0.48	36	5.675	10	5.623	6.31	5.012	7.079	5.012	5.623	5.012	6.31	5.012
sub1	2012-04-11	47	1.5	0.48	36	6.38	7.943	5.623	8.913	5.012	7.079	5.012	6.31	5.623	7.943	6.31
sub1	2012-04-11	47	1.5	0.48	126	7	7.943	5.012	7.079	6.31	8.913	6.31	7.079	6.31	7.079	6.31
sub1	2012-04-11	47	1.5	0.48	126	12.708	15.849	12.589	17.783	15.849	17.783	7.943	12.589	11.22	14.125	12.589
sub1	2012-04-11	47	1.5	0.48	126	5.312	7.943	5.623	7.079	6.31	7.943	5.623	6.31	3.548	4.467	3.981
sub1	2012-04-11	47	1.5	0.48	126	6.082	7.943	6.31	8.913	7.079	8.913	5.623	6.31	5.012	5.623	5.012
sub1	2012-04-11	47	1.5	0.48	126	7.416	7.943	6.31	7.943	6.31	7.079	6.31	7.943	6.31	8.913	7.943
sub1	2012-04-11	47	1.5	0.48	126	8.16	10	7.079	7.943	5.012	10	7.943	8.913	7.079	7.943	7.079
sub1	2012-04-12	47	1.5	0.48	36	3.324	7.943	5.623	6.31	4.467	5.012	3.162	3.548	2.239	3.162	2.818
sub1	2012-04-12	47	1.5	0.48	36	5.034	5.012	6.31	5.012	5.623	5.012	5.623	4.467	5.623	4.467	5.012
sub1	2012-04-12	47	1.5	0.48	36	3.599	3.162	3.981	3.548	3.981	3.162	3.548	3.162	3.548	3.162	5.012
sub1	2012-04-12	47	1.5	0.48	36	3.003	7.943	3.981	4.467	3.162	4.467	2.239	2.818	2.512	3.162	2.818
sub1	2012-04-12	47	1.5	0.48	36	3.846	3.981	5.012	4.467	5.012	3.548	3.981	3.548	3.981	3.548	4.467
sub1	2012-04-12	47	1.5	0.48	36	3.798	12.589	3.981	4.467	3.981	4.467	3.981	4.467	3.162	3.548	3.162
sub1	2012-04-12	47	1.5	0.48	36	4.589	3.981	5.012	4.467	5.623	4.467	5.623	3.981	4.467	3.981	5.012
sub1	2012-04-12	47	1.5	0.48	36	2.99	2.512	3.162	2.818	3.162	2.818	3.162	2.818	3.162	2.818	3.162
sub1	2012-04-14	47	1.5	0.48	36	5.442	5.012	6.31	5.012	6.31	5.623	7.079	5.623	6.31	3.548	4.467
sub1	2012-04-14	47	1.5	0.48	36	3.055	5.012	6.31	5.012	5.623	2.818	3.162	2.818	3.162	2.818	3.548
sub1	2012-04-14	47	1.5	0.48	36	3.996	5.012	6.31	5.623	6.31	5.623	6.31	2.818	3.162	2.512	3.548
sub1	2012-04-14	47	1.5	0.48	36	3.546	1.585	2.239	1.995	2.512	1.995	4.467	3.981	4.467	2.818	3.548
sub1	2012-04-14	47	1.5	0.48	36	2.895	3.981	5.012	4.467	5.012	2.512	2.818	2.512	3.548	2.818	3.162
sub1	2012-04-14	47	1.5	0.48	36	2.223	3.162	3.981	2.818	3.548	2.512	2.818	1.995	2.239	1.778	1.995
sub1	2012-04-14	47	1.5	0.48	36	4.516	3.981	5.012	3.162	4.467	3.548	4.467	3.981	5.623	4.467	5.012
sub1	2012-04-14	47	1.5	0.48	36	2.734	7.943	3.981	4.467	2.818	3.162	1.778	3.548	2.239	3.162	2.512
sub1	2012-04-14	47	1.5	0.48	36	2.146	1.995	2.512	1.778	2.239	1.778	1.995	1.778	1.995	1.778	3.548
sub1	2012-04-14	47	1.5	0.48	36	3.507	3.981	5.623	3.162	3.548	2.818	3.548	3.162	3.981	3.548	3.981
sub1	2012-04-15	47	1.5	0.48	36	3.846	3.981	5.623	3.162	3.981	3.548	3.981	3.548	3.981	3.548	4.467
sub1	2012-04-15	47	1.5	0.48	36	3.204	3.162	3.981	2.818	3.162	2.818	3.548	2.818	3.548	2.512	3.981
sub1	2012-04-15	47	1.5	0.48	36	3.765	7.943	3.548	4.467	3.548	3.981	3.548	3.981	3.548	3.981	3.548
sub1	2012-04-15	47	1.5	0.48	36	2.895	5.012	6.31	3.162	3.548	3.162	3.548	2.512	2.818	2.512	2.818
sub1	2012-04-15	47	1.5	0.48	36	3.1	1.995	2.512	2.239	2.512	2.239	2.512	2.239	4.467	3.162	3.981
sub1	2012-04-15	47	1.5	0.48	36	3.227	3.981	5.623	3.981	4.467	3.162	3.548	2.512	4.467	2.512	3.162
sub1	2012-04-15	47	1.5	0.48	36	3.55	3.162	3.981	1.995	2.818	2.512	5.012	3.981	4.467	2.512	2.818
sub1	2012-04-15	47	1.5	0.48	36	4.315	5.012	6.31	3.981	4.467	3.981	4.467	3.981	4.467	3.981	5.012
sub1	2012-04-15	47	1.5	0.48	36	3.523	3.162	3.981	2.818	3.548	3.162	3.548	3.162	3.981	2.818	4.467
sub1	2012-04-15	47	1.5	0.48	36	1.689	1.995	2.512	2.239	2.512	1.585	1.778	1.585	1.778	1.413	1.995
sub1	2012-04-16	47	1.5	0.48	36	3.017	1.995	2.512	2.239	2.818	2.512	3.548	3.162	3.548	2.512	2.818
sub1	2012-04-16	47	1.5	0.48	36	3.019	7.943	3.548	3.981	3.162	3.981	3.162	3.981	2.239	2.512	2.239
sub1	2012-04-16	47	1.5	0.48	36	2.734	1.995	2.512	1.995	3.548	2.512	2.818	2.239	3.162	2.512	3.162
sub1	2012-04-16	47	1.5	0.48	36	2.146	1.995	3.162	2.818	3.162	2.512	2.818	1.778	1.995	1.778	1.995
sub1	2012-04-16	47	1.5	0.48	36	2.045	2.512	3.162	1.995	2.239	1.995	2.239	1.778	2.239	1.778	2.239
sub1	2012-04-16	47	1.5	0.48	36	1.425	1.585	1.995	1.585	1.778	1.259	1.413	1.259	1.778	1.259	1.585
sub1	2012-04-16	47	1.5	0.48	36	1.92	2.512	3.162	2.239	2.512	2.239	2.512	1.778	1.995	1.413	1.585
sub1	2012-04-16	47	1.5	0.48	36	2.386	5.012	6.31	2.512	2.818	1.995	2.512	2.239	2.512	2.239	2.818
sub1	2012-04-16	47	1.5	0.48	36	2.802	1.259	2.239	1.995	2.512	1.995	2.512	1.778	4.467	2.512	3.548
sub1	2012-04-16	47	1.5	0.48	36	2.529	3.162	3.981	2.512	3.162	2.512	3.162	2.239	2.512	2.239	2.512
sub1	2012-04-17	47	1.5	0.48	36	3.234	3.981	5.012	3.981	4.467	3.162	3.548	3.162	3.548	2.818	3.162
sub1	2012-04-17	47	1.5	0.48	36	1.704	3.981	5.012	3.162	3.548	1.259	1.413	0.891	2.239	1.259	3.162
sub1	2012-04-17	47	1.5	0.48	36	2.321	1.995	2.512	2.239	2.512	1.995	2.239	1.778	2.512	2.239	3.162
sub1	2012-04-17	47	1.5	0.48	36	1.834	1.995	2.512	2.239	2.512	1.995	2.239	1.778	1.995	1.413	1.585
sub1	2012-04-17	47	1.5	0.48	36	2.734	2.512	3.548	2.239	2.512	2.239	3.162	2.512	2.818	2.512	3.162
sub1	2012-04-17	47	1.5	0.48	36	1.586	3.162	5.012	3.162	3.548	1.778	1.995	1.585	1.778	1.122	1.259
sub1	2012-04-17	47	1.5	0.48	36	2.385	1.585	1.995	1.778	1.995	1.778	2.239	1.995	3.548	2.239	2.512
sub1	2012-04-17	47	1.5	0.48	36	2.866	3.981	5.012	3.981	4.467	3.162	3.548	3.162	3.548	1.778	1.995
sub1	2012-04-17	47	1.5	0.48	36	2.158	3.981	5.012	2.239	2.818	1.778	1.995	1.778	2.239	1.995	3.162
sub1	2012-04-17	47	1.5	0.48	36	2.126	3.981	5.012	3.981	4.467	2.239	2.512	1.995	2.239	1.778	1.995
sub1	2012-04-18	47	1.5	0.48	36	1.981	3.981	5.012	3.548	3.981	1.778	2.239	1.778	1.995	1.585	2.512
sub1	2012-04-18	47	1.5	0.48	36	2.785	3.162	3.981	3.162	3.548	2.818	3.162	2.818	3.162	2.239	2.512
sub1	2012-04-18	47	1.5	0.48	36	1.444	3.981	5.012	2.512	2.818	1.413	1.585	1.413	1.585	1.259	1.413
sub1	2012-04-18	47	1.5	0.48	36	2.375	3.162	3.981	1.778	2.818	2.239	2.512	2.239	2.512	2.239	2.512
sub1	2012-04-18	47	1.5	0.48	36	2.808	2.512	3.162	2.818	3.162	2.818	3.548	3.162	3.548	1.778	1.995
sub1	2012-04-18	47	1.5	0.48	126	3.434	7.943	6.31	7.079	3.981	4.467	3.548	3.981	2.239	3.548	2.818
sub1	2012-04-18	47	1.5	0.48	126	2.635	1.585	2.512	1.778	1.995	1.778	1.995	1.778	3.548	3.162	3.548
sub1	2012-04-18	47	1.5	0.48	126	3.415	3.981	5.012	4.467	5.012	3.981	4.467	2.512	3.162	2.818	3.548
sub1	2012-04-18	47	1.5	0.48	126	3.113	3.981	5.012	3.162	5.012	2.512	2.818	2.512	3.548	2.818	4.467
sub1	2012-04-18	47	1.5	0.48	126	3.419	5.012	6.31	3.981	5.012	4.467	5.623	2.512	3.162	2.239	2.512
sub2	2012-04-11	47	1.5	0.48	36	4.17	7.943	5.012	5.623	3.981	5.012	4.467	5.012	3.548	4.467	2.512
sub2	2012-04-11	47	1.5	0.48	36	3.765	3.162	3.981	3.162	3.981	3.548	3.981	3.548	3.981	3.548	3.981
sub2	2012-04-11	47	1.5	0.48	36	3.442	3.981	5.012	3.981	4.467	2.818	3.548	3.162	3.981	3.162	3.981
sub2	2012-04-11	47	1.5	0.48	36	3.564	3.981	5.012	4.467	5.012	3.548	3.981	3.162	3.548	3.162	3.981
sub2	2012-04-11	47	1.5	0.48	36	2.895	3.162	3.981	2.818	3.162	2.512	2.818	2.512	3.548	2.818	3.162
sub2	2012-04-11	47	1.5	0.48	36	3.7	3.162	3.981	3.548	4.467	3.162	3.981	3.548	3.981	3.548	3.981
sub2	2012-04-11	47	1.5	0.48	126	3.628	5.012	6.31	2.818	4.467	3.548	3.981	3.548	3.981	3.162	3.548
sub2	2012-04-11	47	1.5	0.48	126	3.808	2.512	3.548	2.512	3.981	3.162	3.981	3.548	3.981	3.162	5.012
sub2	2012-04-11	47	1.5	0.48	126	1.827	1.995	2.512	2.239	2.512	1.995	2.239	1.585	1.778	1.585	1.778
sub2	2012-04-11	47	1.5	0.48	126	2.177	1.585	1.995	1.585	1.995	1.778	2.239	1.995	2.239	1.995	2.818
sub2	2012-04-11	47	1.5	0.48	126	2.58	3.981	5.623	2.239	3.162	2.818	3.162	2.239	2.512	2.239	2.512
sub2	2012-04-11	47	1.5	0.48	126	3.798	3.981	5.012	3.548	3.981	3.162	4.467	3.981	4.467	3.162	3.548
sub2	2012-04-12	47	1.5	0.48	126	2.797	1.259	1.585	1.259	1.995	1.585	2.512	2.239	3.162	2.818	4.467
sub2	2012-04-12	47	1.5	0.48	126	2.514	3.162	4.467	3.981	5.012	2.818	3.162	2.512	2.818	1.778	1.995
sub2	2012-04-12	47	1.5	0.48	126	2.266	1.259	1.778	1.585	1.778	1.585	2.512	2.239	2.512	2.239	2.512
sub2	2012-04-12	47	1.5	0.48	126	1.321	0.794	1.585	1.122	1.259	1	1.585	1.259	1.413	1.259	1.413
sub2	2012-04-12	47	1.5	0.48	126	2.62	3.981	5.012	2.512	2.818	2.512	2.818	2.512	2.818	2.239	2.818
sub2	2012-04-12	47	1.5	0.48	126	2.004	1.585	2.239	1.778	2.818	1.995	2.239	1.778	2.239	1.778	1.995
sub2	2012-04-12	47	1.5	0.48	126	2.172	7.943	3.548	3.981	1.995	2.512	1.995	2.239	1.778	2.512	1.995
sub2	2012-04-12	47	1.5	0.48	126	2.264	1.995	2.818	1.778	2.239	1.995	2.239	1.778	2.818	2.239	2.512
sub2	2012-04-12	47	1.5	0.48	126	2.722	3.981	5.012	4.467	5.623	2.512	2.818	2.512	3.162	2.512	2.818
sub2	2012-04-12	47	1.5	0.48	126	3.094	2.512	3.162	2.818	3.162	2.239	3.162	2.818	3.981	2.818	3.548
sub2	2012-04-14	47	1.5	0.48	126	2.212	3.162	3.981	2.512	2.818	2.239	2.512	1.778	2.239	1.995	2.512
sub2	2012-04-14	47	1.5	0.48	126	1.611	3.162	3.981	1.995	2.512	2.239	2.512	1.122	1.259	1.122	1.413
sub2	2012-04-14	47	1.5	0.48	126	2.029	3.981	5.012	3.548	3.981	2.239	2.512	1.995	2.239	1.413	1.778
sub2	2012-04-14	47	1.5	0.48	126	0.495	0.316	0.708	0.501	0.631	0.447	0.501	0.398	0.562	0.501	0.562
sub2	2012-04-14	47	1.5	0.48	126	1.534	1.585	1.995	1.585	1.778	1.585	1.778	1.259	1.585	1.413	1.585
sub2	2012-04-14	47	1.5	0.48	126	1.396	1.259	1.585	1.259	1.413	1.259	1.413	1.122	1.585	1.413	1.585
sub2	2012-04-14	47	1.5	0.48	126	1.516	2.512	3.162	2.818	3.162	1.585	1.995	1.259	1.585	1.259	1.413
sub2	2012-04-14	47	1.5	0.48	126	3.846	3.162	3.981	3.548	3.981	3.548	4.467	3.548	3.981	3.548	3.981
sub2	2012-04-14	47	1.5	0.48	126	2.85	2.512	3.548	1.995	2.818	2.512	2.818	2.239	3.548	2.818	3.162
sub2	2012-04-14	47	1.5	0.48	126	1.428	2.512	3.162	1.778	1.995	1.122	1.413	1.259	1.778	1.413	1.585
sub2	2012-04-15	47	1.5	0.48	126	2.263	3.981	5.012	3.548	4.467	2.818	3.162	1.995	2.239	1.585	1.778
sub2	2012-04-15	47	1.5	0.48	126	1.628	1.585	2.239	1.995	2.239	1.585	1.778	1.413	1.995	1.413	1.585
sub2	2012-04-15	47	1.5	0.48	126	2.408	3.162	4.467	2.239	3.162	2.818	3.162	1.995	2.239	1.995	2.239
sub2	2012-04-15	47	1.5	0.48	126	1.727	1.995	2.512	1.995	2.239	1.995	2.239	1.995	2.239	0.891	1
sub2	2012-04-15	47	1.5	0.48	126	1.299	1.995	2.512	1.778	1.995	1.122	1.585	1.122	1.259	1.122	1.585
sub2	2012-04-15	47	1.5	0.48	126	0.812	0.631	0.891	0.794	0.891	0.794	0.891	0.794	0.891	0.708	0.794
sub2	2012-04-15	47	1.5	0.48	126	1.592	1.585	1.995	1.585	1.995	1.585	1.778	1.413	1.778	1.413	1.585
sub2	2012-04-15	47	1.5	0.48	126	1.653	2.512	3.162	1.778	1.995	1.413	1.778	1.585	1.778	1.585	1.778
sub2	2012-04-15	47	1.5	0.48	126	1.422	1.585	2.239	1.413	1.585	1.413	1.778	1.259	1.413	1.259	1.413
sub2	2012-04-15	47	1.5	0.48	126	1.931	1.585	1.995	1.778	2.239	1.778	2.818	1.585	1.995	1.413	1.995
sub2	2012-04-16	47	1.5	0.48	126	1.388	2.512	3.162	1.995	2.239	1.585	1.778	1	1.259	1.122	1.585
sub2	2012-04-16	47	1.5	0.48	126	1.316	0.794	1	0.794	1.413	1.259	1.413	1.259	1.585	1.122	1.259
sub2	2012-04-16	47	1.5	0.48	126	1.313	1.585	1.995	1.413	1.585	1.122	1.413	1.259	1.413	1.259	1.413
sub2	2012-04-16	47	1.5	0.48	126	0.677	1	1.259	0.562	0.631	0.562	0.708	0.631	0.708	0.562	0.891
sub2	2012-04-16	47	1.5	0.48	126	1.627	1.585	2.239	1.995	2.239	1.585	1.778	1.259	1.778	1.585	1.778
sub2	2012-04-16	47	1.5	0.48	126	1.031	1.585	2.239	0.794	1.122	0.891	1.259	1.122	1.413	0.708	0.794
sub2	2012-04-16	47	1.5	0.48	126	0.861	1	1.413	1.122	1.259	1.122	1.413	0.708	0.794	0.501	0.631
sub2	2012-04-16	47	1.5	0.48	126	1.519	1.585	1.995	1.778	1.995	1.778	1.995	1.259	1.413	1.259	1.413
sub2	2012-04-16	47	1.5	0.48	126	1.602	1.585	2.239	1.995	2.239	1.995	2.239	1.122	1.585	1.259	1.413
sub2	2012-04-16	47	1.5	0.48	126	1.786	3.162	3.981	1.778	1.995	1.778	1.995	1.585	1.995	1.585	1.778
sub2	2012-04-18	47	1.5	0.48	126	1.328	1.585	1.995	1.413	1.585	1.259	1.778	1.259	1.413	1	1.259
sub2	2012-04-18	47	1.5	0.48	126	0.716	1.995	2.512	1.259	1.585	0.708	0.794	0.708	0.891	0.562	0.631
sub2	2012-04-18	47	1.5	0.48	126	3.112	3.162	3.981	3.548	3.981	3.162	3.548	2.818	3.162	2.818	3.162
sub2	2012-04-18	47	1.5	0.48	126	1.319	1	1.778	1.413	1.585	1.413	1.585	1.413	1.585	0.794	1.122
sub2	2012-04-18	47	1.5	0.48	126	0.789	1	1.259	0.891	1	0.794	1	0.708	0.891	0.631	0.708
sub2	2012-04-18	47	1.5	0.48	126	0.998	1.585	1.995	1.259	1.413	1.259	1.585	0.891	1.122	0.501	0.631
sub2	2012-04-18	47	1.5	0.48	126	1.293	2.512	3.162	1.259	1.413	1.259	1.413	1	1.413	1.259	1.413
sub2	2012-04-18	47	1.5	0.48	126	0.488	0.794	1	0.631	0.794	0.355	0.562	0.501	0.562	0.447	0.501
sub2	2012-04-18	47	1.5	0.48	126	2.58	2.512	3.162	2.512	2.818	2.512	3.162	2.239	2.512	2.239	2.818
sub2	2012-04-19	47	1.5	0.48	36	1.505	7.943	1.585	1.995	1.413	1.585	1.259	1.585	1.413	1.778	1.413
sub2	2012-04-19	47	1.5	0.48	36	2.426	1.995	3.981	3.162	3.548	2.239	2.818	2.239	2.512	2.239	2.512
sub2	2012-04-19	47	1.5	0.48	36	1.327	2.512	3.162	1.413	1.585	1.122	1.259	1	1.585	1.413	1.585
sub2	2012-04-19	47	1.5	0.48	36	1.919	1.585	2.239	1.995	3.162	2.818	3.162	1.413	1.585	1.122	1.413
sub2	2012-04-19	47	1.5	0.48	36	1.373	3.981	5.012	1.259	1.778	1.122	1.413	1.122	1.585	1.413	1.585
sub2	2012-04-19	47	1.5	0.48	126	1.141	0.794	1.413	1.259	1.585	1.259	1.413	1	1.259	0.794	1.122
sub2	2012-04-19	47	1.5	0.48	126	1.64	7.943	2.512	2.818	2.512	2.818	1.122	1.778	1.413	1.585	1.122
sub2	2012-04-19	47	1.5	0.48	126	0.85	1	1.259	1.122	1.259	0.794	0.891	0.501	0.631	0.501	0.562
sub2	2012-04-19	47	1.5	0.48	126	0.85	1	1.413	1.259	1.585	0.891	1	0.794	0.891	0.631	0.794
sub2	2012-04-19	47	1.5	0.48	126	0.85	1	1.259	1.122	1.413	0.708	0.794	0.631	0.708	0.501	0.631
sub3	2012-04-16	47	1.5	0.48	36	5.318	7.943	5.012	5.623	5.012	5.623	5.012	5.623	5.012	5.623	5.012
sub3	2012-04-16	47	1.5	0.48	36	2.057	2.512	3.162	2.239	2.512	2.239	3.162	1.585	1.778	1.585	1.995
sub3	2012-04-16	47	1.5	0.48	36	1.425	1.585	1.995	1.259	1.413	1.122	1.585	1.413	1.585	1.259	1.585
sub3	2012-04-16	47	1.5	0.48	36	2.172	3.162	3.981	2.239	2.512	1.995	2.512	2.239	2.512	1.778	1.995
sub3	2012-04-16	47	1.5	0.48	36	2.386	1.995	2.818	2.239	2.512	1.995	2.818	2.239	2.512	2.239	2.512
sub3	2012-04-16	47	1.5	0.48	36	2.341	1.585	1.995	1.585	1.995	1.585	1.995	1.585	2.818	2.512	3.548
sub3	2012-04-16	47	1.5	0.48	126	3.08	5.012	6.31	4.467	5.012	2.818	3.548	3.162	3.548	2.239	3.162
sub3	2012-04-16	47	1.5	0.48	126	4.009	2.512	3.162	2.512	3.162	2.239	5.623	4.467	5.012	3.162	3.548
sub3	2012-04-16	47	1.5	0.48	126	2.017	1.995	2.818	2.239	2.512	2.239	2.512	1.585	1.995	1.778	1.995
sub3	2012-04-16	47	1.5	0.48	126	3.306	7.943	2.818	3.162	2.239	3.162	2.818	3.981	3.162	3.548	3.162
sub3	2012-04-16	47	1.5	0.48	126	2.335	1.995	2.512	1.995	2.239	1.995	2.512	2.239	2.512	2.239	2.512
sub3	2012-04-16	47	1.5	0.48	126	3.5	3.162	4.467	3.162	3.548	3.162	3.548	3.162	3.981	3.162	3.981
sub3	2012-04-17	47	1.5	0.48	126	3.798	10	3.548	4.467	3.548	4.467	3.548	3.981	3.162	4.467	3.162
sub3	2012-04-17	47	1.5	0.48	126	3.176	5.012	6.31	2.512	3.162	2.818	3.548	3.162	3.548	2.818	3.162
sub3	2012-04-17	47	1.5	0.48	126	1.923	7.943	3.162	3.548	2.512	2.818	1.778	1.995	1.585	1.778	1.585
sub3	2012-04-17	47	1.5	0.48	126	1.696	3.981	5.012	2.818	3.162	1.778	1.995	1.413	1.585	1.413	1.995
sub3	2012-04-17	47	1.5	0.48	126	1.92	1.995	2.512	2.239	2.512	1.585	1.778	1.413	2.239	1.995	2.512
sub3	2012-04-17	47	1.5	0.48	126	3.168	7.943	5.012	5.623	3.981	4.467	3.981	4.467	1.995	2.512	1.585
sub3	2012-04-17	47	1.5	0.48	126	1.298	1.995	3.162	1.413	1.995	1.122	1.413	1.259	1.585	1	1.413
sub3	2012-04-17	47	1.5	0.48	126	2.176	2.512	3.162	2.512	2.818	2.239	2.512	1.778	2.239	1.778	2.512
sub3	2012-04-17	47	1.5	0.48	126	2.58	3.162	3.981	2.512	3.162	2.818	3.162	2.239	2.512	2.239	2.512
sub3	2012-04-17	47	1.5	0.48	126	2.117	3.162	3.981	2.239	2.818	1.995	2.239	1.995	2.239	1.995	2.239
sub3	2012-04-18	47	1.5	0.48	126	2.504	7.943	3.548	3.981	1.995	3.162	2.512	2.818	2.239	2.512	1.778
sub3	2012-04-18	47	1.5	0.48	126	1.582	7.943	1.778	1.995	1.585	2.239	1.259	1.585	1.413	1.585	1.413
sub3	2012-04-18	47	1.5	0.48	126	1.786	1.585	2.512	1.995	2.512	1.778	1.995	1.585	1.995	1.585	1.778
sub3	2012-04-18	47	1.5	0.48	126	1.798	1.995	2.512	1.778	1.995	1.585	1.778	1.413	2.239	1.778	1.995
sub3	2012-04-18	47	1.5	0.48	126	2.289	7.943	3.981	4.467	1.995	2.239	1.995	2.512	2.239	2.512	2.239
sub3	2012-04-18	47	1.5	0.48	126	1.58	3.162	4.467	1.122	1.413	1.122	1.585	1.413	1.778	1.585	1.995
sub3	2012-04-18	47	1.5	0.48	126	1.761	3.162	3.981	1.585	1.995	1.585	1.995	1.413	1.995	1.585	1.995
sub3	2012-04-18	47	1.5	0.48	126	2.1	3.981	5.012	3.548	3.981	2.512	2.818	1.995	2.239	1.259	1.778
sub3	2012-04-20	47	1.5	0.48	126	2.335	7.943	3.981	4.467	2.239	2.512	1.995	2.512	2.239	2.512	2.239
sub3	2012-04-20	47	1.5	0.48	126	1.13	1.585	1.995	1.778	1.995	1.413	1.585	0.891	1	0.891	1
sub3	2012-04-20	47	1.5	0.48	126	1.342	1.259	1.585	1.413	1.778	1.259	1.413	1.259	1.585	1.122	1.413
sub3	2012-04-20	47	1.5	0.48	126	2.334	3.162	3.981	3.162	3.981	2.512	2.818	1.413	2.512	2.239	2.512
sub3	2012-04-20	47	1.5	0.48	126	2.56	3.981	5.012	2.818	3.548	3.162	3.548	2.818	3.162	1.259	1.413
sub3	2012-04-20	47	1.5	0.48	126	1.895	1.995	2.512	1.995	2.512	1.995	2.239	1.778	1.995	1.585	1.778
sub3	2012-04-20	47	1.5	0.48	126	1.943	3.162	3.981	1.778	2.239	1.995	2.239	1.413	1.995	1.778	2.239
sub3	2012-04-20	47	1.5	0.48	126	1.709	7.943	4.467	5.012	1.995	2.512	1.778	1.995	1.259	1.585	1.122
sub3	2012-04-20	47	1.5	0.48	126	1.531	1.259	1.585	1.413	1.585	1.413	1.585	1.413	1.778	1.413	1.585
sub3	2012-04-20	47	1.5	0.48	126	1.927	1.995	2.512	1.778	1.995	1.778	2.239	1.778	1.995	1.778	1.995
sub3	2012-04-21	47	1.5	0.48	126	2.05	7.943	2.239	2.512	2.239	2.512	1.995	2.239	1.778	1.995	1.778
sub3	2012-04-21	47	1.5	0.48	126	1.519	1.995	2.512	1.778	1.995	1.778	1.995	1.259	1.413	1.259	1.413
sub3	2012-04-21	47	1.5	0.48	126	1.688	1.995	2.512	1.995	2.512	2.239	2.512	1.413	1.585	1.122	1.259
sub3	2012-04-21	47	1.5	0.48	126	0.97	1	1.413	1.122	1.259	0.891	1.122	1	1.122	0.794	0.891
sub3	2012-04-21	47	1.5	0.48	126	1.232	1.259	1.585	1	1.122	0.891	1.259	1.122	1.585	1.122	1.413
sub3	2012-04-21	47	1.5	0.48	126	0.85	0.794	1.122	1	1.259	0.794	1	0.708	0.891	0.708	1
sub3	2012-04-21	47	1.5	0.48	126	1.725	1.585	2.239	1.778	2.512	1.995	2.512	1.259	1.585	1.413	1.585
sub3	2012-04-21	47	1.5	0.48	126	1.316	1.585	2.512	1.585	1.778	1	1.122	1	1.778	1.413	1.585
sub3	2012-04-21	47	1.5	0.48	126	1.729	1.585	2.239	1.778	1.995	1.413	1.778	1.413	1.995	1.778	1.995
sub3	2012-04-21	47	1.5	0.48	126	2.58	3.162	3.981	3.548	3.981	2.512	2.818	2.239	3.162	2.239	2.512
sub3	2012-04-22	47	1.5	0.48	126	1.175	0.794	1.122	1	1.122	1	1.259	1.122	1.413	1	1.259
sub3	2012-04-22	47	1.5	0.48	126	2.345	3.162	3.981	2.512	2.818	2.512	2.818	1.995	2.512	1.995	2.239
sub3	2012-04-22	47	1.5	0.48	126	1.887	1.995	2.512	1.995	2.239	1.778	1.995	1.778	1.995	1.778	1.995
sub3	2012-04-22	47	1.5	0.48	126	1.505	5.012	6.31	2.239	2.512	1.585	1.778	1.413	1.585	0.891	1.778
sub3	2012-04-22	47	1.5	0.48	126	1.335	1.259	1.778	1.259	1.778	1.413	1.585	1.413	1.585	0.891	1.122
sub3	2012-04-22	47	1.5	0.48	126	2.163	1.995	2.512	1.995	2.239	1.995	2.239	1.995	2.512	1.995	2.239
sub3	2012-04-22	47	1.5	0.48	126	1.175	1.585	1.995	1.122	1.259	1.122	1.259	1	1.259	1	1.413
sub3	2012-04-22	47	1.5	0.48	126	1.657	1.995	2.512	1.585	1.778	1.585	1.778	1.585	1.995	1.413	1.585
sub3	2012-04-22	47	1.5	0.48	126	0.713	1.585	1.995	1	1.122	0.891	1	0.562	0.631	0.562	0.631
sub3	2012-04-22	47	1.5	0.48	126	0.971	1.585	2.239	1.122	1.413	1.122	1.259	1.122	1.259	0.501	0.562
sub3	2012-04-23	47	1.5	0.48	36	2.18	1.995	2.512	2.239	2.512	2.239	2.512	2.239	2.512	1.585	1.995
sub3	2012-04-23	47	1.5	0.48	36	1.487	1.259	1.778	1.259	1.778	1.585	1.995	1.259	1.413	1.259	1.413
sub3	2012-04-23	47	1.5	0.48	36	2.375	3.981	5.012	4.467	5.012	2.239	2.512	2.239	2.512	2.239	2.512
sub3	2012-04-23	47	1.5	0.48	36	0.85	0.631	0.794	0.398	0.447	0.355	0.447	0.398	0.562	0.355	0.398
sub3	2012-04-23	47	1.5	0.48	36	1.176	1.585	1.995	1.778	1.995	1.778	1.995	0.708	0.891	0.794	0.891
sub3	2012-04-23	47	1.5	0.48	126	1.012	0.794	1	0.891	1.122	1	1.122	1	1.122	0.708	1.122
sub3	2012-04-23	47	1.5	0.48	126	2.004	2.512	3.162	2.239	3.548	1.995	2.239	1.778	1.995	1.778	2.239
sub3	2012-04-23	47	1.5	0.48	126	1.511	1.585	1.995	1.259	1.585	1.122	1.585	1	1.778	1.585	1.995
sub3	2012-04-23	47	1.5	0.48	126	1.07	1.995	2.512	1.995	2.239	1.259	1.585	0.891	1	0.794	0.891
sub3	2012-04-23	47	1.5	0.48	126	1.348	1.259	1.585	1.259	1.413	0.891	1.122	0.891	1.995	1.413	1.778
sub4	2012-04-22	47	1.5	0.48	36	5.97	5.012	6.31	5.623	6.31	5.012	6.31	4.467	7.079	5.012	7.943
sub4	2012-04-22	47	1.5	0.48	36	5.25	5.012	7.079	5.012	6.31	5.623	6.31	4.467	5.012	4.467	5.623
sub4	2012-04-22	47	1.5	0.48	36	4.487	7.943	4.467	5.623	4.467	5.012	4.467	5.012	3.981	4.467	3.981
sub4	2012-04-22	47	1.5	0.48	36	3.385	7.943	3.981	4.467	3.548	3.981	3.162	3.548	2.818	3.981	2.818
sub4	2012-04-22	47	1.5	0.48	36	4.09	3.162	3.981	3.548	5.623	4.467	5.012	3.548	3.981	3.548	3.981
sub4	2012-04-22	47	1.5	0.48	36	4.589	2.512	4.467	3.981	5.623	5.012	5.623	3.981	4.467	3.981	4.467
sub4	2012-04-22	47	1.5	0.48	126	6.09	3.162	5.012	3.162	4.467	3.981	7.079	5.012	7.079	6.31	7.079
sub4	2012-04-22	47	1.5	0.48	126	6.121	7.943	6.31	7.079	4.467	5.623	5.012	7.079	5.623	7.079	6.31
sub4	2012-04-22	47	1.5	0.48	126	5.034	7.943	5.012	5.623	4.467	5.623	4.467	5.012	4.467	5.623	5.012
sub4	2012-04-22	47	1.5	0.48	126	3.918	2.512	3.981	3.548	5.012	3.981	4.467	3.548	3.981	3.548	3.981
sub4	2012-04-22	47	1.5	0.48	126	5.402	3.162	5.012	4.467	5.623	3.548	3.981	3.548	7.079	6.31	7.943
sub4	2012-04-22	47	1.5	0.48	126	3.306	3.162	3.981	3.548	3.981	2.512	2.818	2.512	4.467	3.548	3.981
sub4	2012-04-23	47	1.5	0.48	36	5.239	3.162	5.623	5.012	7.943	5.012	5.623	5.012	6.31	4.467	5.012
sub4	2012-04-23	47	1.5	0.48	36	4.739	7.943	5.623	6.31	3.981	5.012	4.467	5.012	4.467	5.012	4.467
sub4	2012-04-23	47	1.5	0.48	36	4.133	5.012	6.31	3.981	4.467	3.162	3.981	3.162	5.012	4.467	5.012
sub4	2012-04-23	47	1.5	0.48	36	4.152	3.162	5.012	4.467	5.012	3.981	4.467	3.981	4.467	3.548	4.467
sub4	2012-04-23	47	1.5	0.48	36	4.178	3.162	3.981	3.162	3.548	3.162	4.467	3.981	4.467	3.981	5.012
sub4	2012-04-23	47	1.5	0.48	36	4.267	5.012	7.079	4.467	5.623	5.012	7.079	3.548	3.981	2.818	3.162
sub4	2012-04-23	47	1.5	0.48	36	4.17	2.512	3.548	2.818	3.981	3.548	4.467	3.548	4.467	3.981	5.012
sub4	2012-04-23	47	1.5	0.48	36	4.417	2.512	3.981	3.548	4.467	3.981	5.623	3.981	4.467	3.981	4.467
sub4	2012-04-23	47	1.5	0.48	36	2.924	1.995	2.818	1.778	2.239	1.995	2.239	1.995	2.239	1.995	7.079
sub4	2012-04-23	47	1.5	0.48	36	5.377	1.995	3.162	2.818	3.981	3.162	5.623	4.467	7.079	5.623	6.31
sub4	2012-04-24	47	1.5	0.48	36	4.803	3.162	4.467	3.981	5.012	3.548	5.012	4.467	5.012	4.467	6.31
sub4	2012-04-24	47	1.5	0.48	36	3.5	3.981	5.623	3.162	3.981	3.162	3.981	3.162	3.548	3.162	3.981
sub4	2012-04-24	47	1.5	0.48	36	4.658	5.012	6.31	4.467	6.31	3.981	5.012	4.467	5.012	4.467	5.012
sub4	2012-04-24	47	1.5	0.48	36	3.442	3.981	5.623	5.012	5.623	3.162	3.548	3.162	3.981	2.818	3.981
sub4	2012-04-24	47	1.5	0.48	36	4.739	5.012	6.31	4.467	5.012	4.467	5.012	4.467	5.012	4.467	5.012
sub4	2012-04-24	47	1.5	0.48	36	4.178	3.981	5.012	4.467	5.623	4.467	5.012	3.981	4.467	3.162	3.981
sub4	2012-04-24	47	1.5	0.48	36	3.415	3.162	4.467	3.981	4.467	2.512	3.162	2.818	4.467	3.548	3.981
sub4	2012-04-24	47	1.5	0.48	36	4.243	3.981	5.623	3.548	4.467	3.548	4.467	3.981	4.467	3.981	5.012
sub4	2012-04-24	47	1.5	0.48	36	2.357	3.981	5.012	2.239	2.512	2.239	2.512	1.995	2.239	1.995	3.162
sub4	2012-04-24	47	1.5	0.48	36	4.025	3.162	3.981	3.548	3.981	3.548	5.012	3.981	4.467	3.162	3.981
sub4	2012-04-25	47	1.5	0.48	36	4.086	3.162	3.981	3.548	3.981	3.162	4.467	3.981	5.623	2.818	4.467
sub4	2012-04-25	47	1.5	0.48	36	4.162	3.162	5.012	3.981	4.467	3.162	3.548	3.162	5.012	4.467	5.623
sub4	2012-04-25	47	1.5	0.48	36	3.724	3.162	3.981	2.818	3.548	2.818	4.467	3.548	3.981	3.548	3.981
sub4	2012-04-25	47	1.5	0.48	36	3.853	7.943	4.467	5.623	4.467	5.012	3.981	4.467	2.512	3.981	3.162
sub4	2012-04-25	47	1.5	0.48	36	3.862	7.943	3.162	3.548	3.162	4.467	3.162	3.981	3.548	4.467	3.548
sub4	2012-04-25	47	1.5	0.48	36	2.85	1.995	2.512	2.239	2.818	2.512	3.162	2.818	3.548	2.239	2.818
sub4	2012-04-25	47	1.5	0.48	36	3.5	2.512	3.162	2.239	3.162	1.995	3.162	2.818	4.467	3.548	5.012
sub4	2012-04-25	47	1.5	0.48	36	3.255	5.012	6.31	3.162	3.981	3.162	3.548	3.162	3.981	2.512	3.162
sub4	2012-04-25	47	1.5	0.48	36	3.781	3.162	5.012	3.162	3.548	3.162	3.981	3.548	4.467	3.548	3.981
sub4	2012-04-25	47	1.5	0.48	36	4.516	3.981	5.012	3.548	5.012	4.467	5.012	4.467	5.623	3.548	3.981
sub4	2012-04-26	47	1.5	0.48	36	4.363	5.012	6.31	5.012	5.623	5.012	5.623	3.548	3.981	3.548	4.467
sub4	2012-04-26	47	1.5	0.48	36	3.313	3.162	3.981	2.818	4.467	3.548	3.981	2.818	3.162	2.818	3.548
sub4	2012-04-26	47	1.5	0.48	36	3.031	3.981	5.012	3.981	4.467	3.548	3.981	2.512	3.548	1.778	2.818
sub4	2012-04-26	47	1.5	0.48	36	3.004	2.512	3.162	2.512	3.162	2.818	3.548	2.512	3.162	2.818	3.162
sub4	2012-04-26	47	1.5	0.48	36	2.259	3.162	5.012	1.995	2.512	1.995	2.512	1.995	2.239	1.995	2.818
sub4	2012-04-26	47	1.5	0.48	36	2.836	5.012	6.31	5.012	5.623	2.818	3.162	2.818	3.162	2.239	2.818
sub4	2012-04-26	47	1.5	0.48	36	4.953	3.981	5.623	5.012	6.31	5.012	5.623	5.012	5.623	3.981	4.467
sub4	2012-04-26	47	1.5	0.48	36	2.35	1.995	2.512	2.239	2.512	1.778	2.512	2.239	2.512	2.239	2.818
sub4	2012-04-26	47	1.5	0.48	36	2.979	3.162	3.981	3.162	3.548	3.162	3.981	2.818	3.162	2.239	2.512
sub4	2012-04-26	47	1.5	0.48	36	3.523	3.981	5.012	3.548	4.467	3.981	4.467	3.162	3.548	2.818	3.162
sub4	2012-04-26	47	1.5	0.48	36	3.668	2.512	3.981	3.548	3.981	3.162	4.467	3.548	4.467	2.818	3.548
sub4	2012-04-27	47	1.5	0.48	36	3.704	3.981	5.623	3.981	4.467	3.981	4.467	3.981	4.467	2.512	2.818
sub4	2012-04-27	47	1.5	0.48	36	4.015	3.981	5.012	4.467	5.012	3.981	4.467	3.548	4.467	3.162	4.467
sub4	2012-04-27	47	1.5	0.48	36	3.185	5.012	6.31	3.162	4.467	3.981	4.467	2.512	2.818	2.512	2.818
sub4	2012-04-27	47	1.5	0.48	36	2.249	1.995	3.548	3.162	3.981	1.995	2.239	1.995	2.512	2.239	2.512
sub4	2012-04-27	47	1.5	0.48	36	4.075	3.162	3.981	3.162	4.467	3.981	5.012	4.467	5.012	2.818	3.162
sub4	2012-04-27	47	1.5	0.48	36	2.696	3.162	4.467	3.162	4.467	2.239	2.818	2.512	3.548	2.239	2.818
sub4	2012-04-27	47	1.5	0.48	36	1.867	1.995	2.512	1.778	1.995	1.778	2.239	1.585	1.778	1.585	2.239
sub4	2012-04-27	47	1.5	0.48	36	2.916	3.162	3.981	3.162	3.548	2.512	2.818	2.512	3.162	2.512	3.981
sub4	2012-04-27	47	1.5	0.48	36	2.838	2.512	3.162	2.818	4.467	3.548	3.981	2.239	2.512	2.239	2.512
sub4	2012-04-27	47	1.5	0.48	36	2.349	3.162	3.981	2.512	3.162	2.512	2.818	2.239	3.162	1.585	1.778
sub4	2012-04-27	47	1.5	0.48	36	2.259	5.012	6.31	1.995	2.239	1.995	2.239	1.995	2.512	1.995	2.818
sub4	2012-04-28	47	1.5	0.48	36	3.999	3.981	5.012	3.981	5.623	3.981	4.467	3.548	4.467	3.548	3.981
sub4	2012-04-28	47	1.5	0.48	36	2.431	3.162	3.981	3.548	3.981	2.512	2.818	1.995	2.512	2.239	2.512
sub4	2012-04-28	47	1.5	0.48	36	2.831	2.512	3.162	2.512	2.818	2.512	2.818	2.512	3.162	2.818	3.162
sub4	2012-04-28	47	1.5	0.48	36	2.126	1.585	1.995	1.778	2.239	1.995	2.239	1.778	2.239	1.995	2.512
sub4	2012-04-28	47	1.5	0.48	36	2.77	3.162	3.981	3.162	3.548	3.162	3.548	2.512	3.162	1.995	2.239
sub4	2012-04-28	47	1.5	0.48	36	2.677	3.981	5.012	2.512	3.162	2.818	3.162	2.512	2.818	2.239	2.512
sub4	2012-04-28	47	1.5	0.48	126	5.284	7.943	6.31	7.079	5.623	6.31	5.623	6.31	4.467	5.012	3.981
sub4	2012-04-28	47	1.5	0.48	126	4.2	3.162	4.467	3.981	5.623	3.548	4.467	3.548	5.623	3.548	4.467
sub4	2012-04-28	47	1.5	0.48	126	2.676	3.981	5.012	3.548	3.981	3.162	3.548	1.778	2.512	2.239	2.818
sub4	2012-04-28	47	1.5	0.48	126	4.414	5.012	6.31	4.467	5.012	4.467	5.012	4.467	5.012	3.548	3.981
sub4	2012-04-28	47	1.5	0.48	126	2.355	1.995	3.981	3.548	3.981	2.512	2.818	1.995	2.512	1.778	2.512
sub4	2012-04-28	47	1.5	0.48	126	2.785	3.981	5.623	3.162	3.981	2.818	3.162	2.512	2.818	2.239	3.162
sub5	2012-04-22	47	1.5	0.48	36	5.26	10	6.31	7.079	5.623	6.31	5.012	5.623	5.012	5.623	3.981
sub5	2012-04-22	47	1.5	0.48	36	5.105	7.943	5.623	7.079	6.31	7.079	3.981	5.012	4.467	5.623	4.467
sub5	2012-04-22	47	1.5	0.48	36	5.121	5.012	7.943	7.079	7.943	7.079	7.943	3.981	5.012	3.162	3.548
sub5	2012-04-22	47	1.5	0.48	36	4.932	10	7.943	8.913	4.467	5.012	4.467	5.012	4.467	5.623	5.012
sub5	2012-04-22	47	1.5	0.48	36	5.686	1.585	2.239	1.995	5.623	5.012	5.623	4.467	7.079	5.623	6.31
sub5	2012-04-22	47	1.5	0.48	36	3.564	3.162	4.467	2.512	3.548	3.162	3.548	3.162	3.981	3.548	3.981
sub5	2012-04-22	47	1.5	0.48	126	7.128	7.943	6.31	10	7.079	8.913	7.943	10	5.623	6.31	3.981
sub5	2012-04-22	47	1.5	0.48	126	6.494	7.943	5.012	5.623	5.012	6.31	5.012	7.943	6.31	7.079	6.31
sub5	2012-04-22	47	1.5	0.48	126	5.263	7.943	5.012	7.079	5.623	6.31	4.467	5.012	4.467	6.31	5.012
sub5	2012-04-22	47	1.5	0.48	126	6.337	7.943	5.012	6.31	5.623	6.31	5.623	7.079	5.623	7.079	6.31
sub5	2012-04-22	47	1.5	0.48	126	6.239	7.943	6.31	7.079	5.623	6.31	5.623	7.943	5.623	6.31	5.623
sub5	2012-04-22	47	1.5	0.48	126	11.178	7.943	6.31	8.913	7.079	11.22	6.31	17.783	11.22	12.589	7.943
sub5	2012-04-23	47	1.5	0.48	36	5.168	7.943	4.467	5.623	5.012	6.31	5.623	7.079	3.981	4.467	3.548
sub5	2012-04-23	47	1.5	0.48	36	4.69	3.162	3.981	3.162	5.623	4.467	5.623	3.981	4.467	3.981	5.623
sub5	2012-04-23	47	1.5	0.48	36	4.886	7.943	3.548	4.467	3.162	3.548	2.512	6.31	5.623	6.31	5.012
sub5	2012-04-23	47	1.5	0.48	36	4.508	3.162	5.623	4.467	5.012	3.981	4.467	3.981	5.012	3.981	5.623
sub5	2012-04-23	47	1.5	0.48	36	4.299	3.981	5.012	3.162	3.548	3.162	5.623	3.548	4.467	3.981	5.012
sub5	2012-04-23	47	1.5	0.48	36	4.658	3.981	5.012	4.467	5.012	3.981	5.012	4.467	5.012	4.467	5.012
sub5	2012-04-23	47	1.5	0.48	36	2.773	2.512	3.162	2.818	3.548	1.995	2.818	2.512	2.818	2.512	3.981
sub5	2012-04-23	47	1.5	0.48	36	4.678	3.162	4.467	3.981	5.623	3.981	6.31	5.012	5.623	3.162	3.981
sub5	2012-04-24	47	1.5	0.48	36	2.999	3.981	5.623	4.467	5.623	3.548	3.981	2.818	3.548	1.585	2.512
sub5	2012-04-24	47	1.5	0.48	36	4.896	10	7.943	8.913	5.623	6.31	5.012	5.623	3.981	4.467	3.981
sub5	2012-04-24	47	1.5	0.48	36	4.333	5.012	6.31	4.467	5.623	3.981	5.012	3.548	4.467	3.981	5.012
sub5	2012-04-24	47	1.5	0.48	36	3.221	5.012	6.31	5.012	5.623	3.548	4.467	2.818	3.162	2.512	2.818
sub5	2012-04-24	47	1.5	0.48	36	3.133	2.512	3.162	2.818	3.548	3.162	3.981	2.818	3.162	2.512	3.162
sub5	2012-04-24	47	1.5	0.48	36	4.862	3.162	3.981	3.548	5.012	4.467	5.012	3.981	5.623	4.467	5.623
sub5	2012-04-24	47	1.5	0.48	36	3.7	3.981	5.012	3.162	3.981	3.548	3.981	3.548	3.981	3.162	3.981
sub5	2012-04-24	47	1.5	0.48	36	2.264	3.981	5.012	3.548	3.981	2.239	2.512	1.778	2.239	1.995	2.818
sub5	2012-04-24	47	1.5	0.48	36	4.243	1.995	3.162	2.818	3.981	3.548	5.012	3.981	4.467	3.981	4.467
sub5	2012-04-25	47	1.5	0.48	36	2.335	3.981	5.012	2.512	2.818	2.239	2.512	1.995	2.512	2.239	2.512
sub5	2012-04-25	47	1.5	0.48	36	2.792	1.995	2.512	2.239	2.818	2.239	3.162	2.512	3.162	2.512	3.162
sub5	2012-04-25	47	1.5	0.48	36	2.569	3.981	5.012	2.512	2.818	2.512	2.818	2.512	2.818	2.239	2.512
sub5	2012-04-25	47	1.5	0.48	36	3.889	3.981	5.012	3.548	3.981	3.162	4.467	3.981	5.012	3.162	3.548
sub5	2012-04-25	47	1.5	0.48	36	4.995	5.012	6.31	5.012	5.623	5.012	5.623	5.012	6.31	3.548	4.467
sub5	2012-04-25	47	1.5	0.48	36	3.427	5.012	6.31	3.548	3.981	3.162	3.548	3.162	3.548	3.162	3.981
sub5	2012-04-25	47	1.5	0.48	36	1.754	1.995	2.512	1.259	1.778	1.585	1.995	1.585	1.778	1.585	1.995
sub5	2012-04-25	47	1.5	0.48	36	4.306	5.012	6.31	4.467	5.012	3.548	3.981	3.548	4.467	3.981	6.31
sub5	2012-04-25	47	1.5	0.48	36	3.531	3.162	3.981	3.548	4.467	3.981	4.467	3.981	4.467	1.778	2.512
sub5	2012-04-25	47	1.5	0.48	36	3.933	7.943	5.623	6.31	3.981	4.467	3.981	5.012	3.162	4.467	2.512
sub5	2012-04-26	47	1.5	0.48	36	3.933	5.012	6.31	3.162	3.548	3.162	3.548	2.818	4.467	3.981	5.623
sub5	2012-04-26	47	1.5	0.48	36	3.125	2.512	3.162	2.239	4.467	2.818	3.162	2.512	3.548	3.162	3.548
sub5	2012-04-26	47	1.5	0.48	36	3.176	2.512	3.981	2.818	3.548	3.162	3.548	2.818	3.548	2.818	3.162
sub5	2012-04-26	47	1.5	0.48	36	2.774	2.512	3.162	2.818	3.548	2.818	3.162	2.512	2.818	2.512	2.818
sub5	2012-04-26	47	1.5	0.48	36	2.99	3.981	5.012	3.162	3.548	2.818	3.162	2.818	3.162	2.818	3.162
sub5	2012-04-26	47	1.5	0.48	36	3.564	2.512	3.162	2.239	3.548	3.162	3.548	3.162	3.981	3.548	3.981
sub5	2012-04-26	47	1.5	0.48	36	3.636	3.162	3.981	3.548	4.467	3.548	3.981	3.162	3.981	3.162	3.981
sub5	2012-04-26	47	1.5	0.48	36	4.487	3.981	5.012	3.162	5.012	3.981	5.012	4.467	5.012	3.981	4.467
sub5	2012-04-26	47	1.5	0.48	36	3.455	5.012	6.31	5.012	5.623	3.162	3.548	2.512	3.981	3.548	3.981
sub5	2012-04-26	47	1.5	0.48	36	2.645	2.512	3.162	2.239	3.162	2.512	3.548	2.239	2.512	2.239	2.818
sub5	2012-04-27	47	1.5	0.48	36	3.781	3.162	3.981	3.162	3.548	3.162	3.981	3.548	3.981	3.548	4.467
sub5	2012-04-27	47	1.5	0.48	36	2.484	1.995	2.818	2.239	2.512	2.239	2.512	2.239	2.512	2.239	3.162
sub5	2012-04-27	47	1.5	0.48	36	3.781	3.162	3.981	3.548	3.981	3.548	3.981	3.548	4.467	3.162	3.981
sub5	2012-04-27	47	1.5	0.48	36	3.599	3.981	5.012	4.467	5.012	3.162	5.012	3.162	3.548	3.162	3.548
sub5	2012-04-27	47	1.5	0.48	36	2.223	1.585	1.995	1.778	1.995	1.778	2.512	1.995	2.239	1.995	2.818
sub5	2012-04-27	47	1.5	0.48	36	5.341	5.012	6.31	5.623	6.31	5.623	6.31	5.012	5.623	4.467	5.012
sub5	2012-04-27	47	1.5	0.48	36	3.112	2.512	3.162	2.239	3.548	3.162	3.548	2.818	3.162	2.818	3.162
sub5	2012-04-27	47	1.5	0.48	36	4.025	3.162	3.981	3.162	4.467	3.981	5.012	3.548	4.467	3.162	3.981
sub5	2012-04-27	47	1.5	0.48	36	4.496	5.012	7.079	4.467	5.012	3.981	5.012	3.981	5.012	3.981	5.012
sub5	2012-04-27	47	1.5	0.48	36	3.124	3.162	4.467	3.162	3.981	3.548	4.467	1.995	2.512	2.239	3.981
sub5	2012-04-28	47	1.5	0.48	36	3.523	2.512	3.162	2.818	3.548	3.162	3.981	2.818	3.548	3.162	4.467
sub5	2012-04-28	47	1.5	0.48	36	3.492	3.981	5.623	3.981	4.467	3.548	3.981	3.162	3.548	3.162	3.548
sub5	2012-04-28	47	1.5	0.48	36	3.699	7.943	3.162	3.548	2.512	3.162	2.512	3.981	3.548	5.012	3.981
sub5	2012-04-28	47	1.5	0.48	36	3.732	7.943	5.012	5.623	3.548	3.981	3.162	3.981	2.818	4.467	3.981
sub5	2012-04-28	47	1.5	0.48	36	4.417	3.162	3.981	3.548	4.467	3.981	4.467	3.981	5.623	3.981	4.467
sub5	2012-04-28	47	1.5	0.48	126	4.953	3.981	5.012	4.467	5.623	4.467	5.012	3.981	5.623	5.012	5.623
sub5	2012-04-28	47	1.5	0.48	126	4.76	5.012	6.31	3.162	5.012	4.467	5.012	3.981	5.623	4.467	5.012
sub5	2012-04-28	47	1.5	0.48	126	5.675	12.589	5.623	6.31	5.012	5.623	5.012	7.079	5.012	6.31	5.012
sub5	2012-04-28	47	1.5	0.48	126	3.659	2.512	3.548	3.162	3.548	2.818	3.162	2.512	4.467	3.981	5.012
sub5	2012-04-28	47	1.5	0.48	126	3.643	7.943	6.31	7.079	2.512	3.981	2.818	3.981	3.548	3.981	3.548
sub6	2013-04-12	47	1.5	0.48	36	2.951	3.981	5.012	3.981	4.467	3.981	4.467	2.239	2.512	1.995	2.512
sub6	2013-04-12	47	1.5	0.48	36	4.533	5.012	6.31	5.012	5.623	4.467	5.623	4.467	5.012	3.162	4.467
sub6	2013-04-12	47	1.5	0.48	36	1.534	2.512	3.548	2.512	2.818	1.585	1.778	1.413	1.585	1.259	1.585
sub6	2013-04-12	47	1.5	0.48	36	1.588	0.794	1	0.891	1	0.891	1	0.891	2.512	1.995	2.239
sub6	2013-04-12	47	1.5	0.48	36	2.602	3.162	3.981	2.818	3.548	2.818	3.162	2.818	3.162	1.413	2.239
sub6	2013-04-12	47	1.5	0.48	36	2.043	1.995	2.818	2.512	2.818	1.585	1.995	1.413	2.512	2.239	2.512
sub6	2013-04-12	47	1.5	0.48	126	2.665	3.981	5.012	3.981	4.467	2.512	2.818	2.512	2.818	2.512	2.818
sub6	2013-04-12	47	1.5	0.48	126	1.242	7.943	3.548	4.467	1.778	1.995	1.259	1.413	0.891	1	0.891
sub6	2013-04-12	47	1.5	0.48	126	3.387	3.981	5.012	3.981	5.012	2.512	2.818	2.512	4.467	3.548	4.467
sub6	2013-04-12	47	1.5	0.48	126	3.37	7.943	4.467	5.012	2.512	3.162	2.818	3.548	3.162	3.981	3.548
sub6	2013-04-12	47	1.5	0.48	126	2.335	1.995	2.512	1.995	2.239	1.995	2.239	1.995	2.239	1.995	3.548
sub6	2013-04-12	47	1.5	0.48	126	1.347	1.259	1.778	1.585	1.778	1.413	1.585	1	1.413	1.259	1.413
sub6	2013-04-14	47	1.5	0.48	126	5.821	7.943	5.623	6.31	5.012	7.079	5.623	6.31	5.623	6.31	3.981
sub6	2013-04-14	47	1.5	0.48	126	0.973	0.631	0.891	0.794	1.122	0.794	1	0.891	1	0.891	1.259
sub6	2013-04-14	47	1.5	0.48	126	3.765	3.981	5.012	2.512	3.981	3.548	3.981	3.548	3.981	3.548	3.981
sub6	2013-04-14	47	1.5	0.48	126	2.636	1.585	1.995	1.778	2.512	1.995	3.162	2.512	2.818	2.512	2.818
sub6	2013-04-14	47	1.5	0.48	126	4.505	5.012	6.31	4.467	5.012	4.467	5.012	3.981	5.012	3.548	5.012
sub6	2013-04-14	47	1.5	0.48	126	1.076	1.585	1.995	1.778	1.995	1.413	1.585	1	1.122	0.631	0.708
sub6	2013-04-14	47	1.5	0.48	126	2.289	1.995	2.818	2.512	2.818	2.239	2.512	2.239	2.512	1.995	2.239
sub6	2013-04-14	47	1.5	0.48	126	2.591	2.512	3.162	2.239	3.162	2.818	3.162	2.512	2.818	1.995	2.239
sub6	2013-04-14	47	1.5	0.48	126	3.7	7.943	5.012	6.31	3.548	3.981	3.548	3.981	3.548	3.981	3.162
sub6	2013-04-14	47	1.5	0.48	126	4.025	3.981	5.012	3.548	4.467	3.548	3.981	3.162	4.467	3.981	5.012
sub6	2013-04-15	47	1.5	0.48	126	1.141	7.943	5.623	7.079	1.122	1.413	1	1.259	1.122	1.259	0.794
sub6	2013-04-15	47	1.5	0.48	126	1.964	1.585	2.239	1.995	2.239	1.995	2.239	1.778	1.995	1.778	1.995
sub6	2013-04-15	47	1.5	0.48	126	1.473	3.981	5.012	1.259	1.413	1.259	1.585	1.413	1.585	1.413	1.585
sub6	2013-04-15	47	1.5	0.48	126	1.438	2.512	3.162	1.995	2.239	1.995	2.239	1.122	1.259	0.891	1.122
sub6	2013-04-15	47	1.5	0.48	126	1.622	1.585	2.239	1.778	1.995	1.259	1.585	1.122	1.995	1.778	1.995
sub6	2013-04-15	47	1.5	0.48	126	0.445	1.259	1.585	0.562	0.631	0.501	0.631	0.282	0.398	0.355	0.501
sub6	2013-04-15	47	1.5	0.48	126	3.35	3.981	5.012	3.981	4.467	3.981	4.467	2.818	3.162	2.512	3.162
sub6	2013-04-15	47	1.5	0.48	126	1.198	1.995	2.818	2.512	2.818	1.259	1.413	1	1.259	1	1.259
sub6	2013-04-15	47	1.5	0.48	126	2.18	3.162	3.981	2.512	2.818	1.995	2.239	1.585	2.512	2.239	2.512
sub6	2013-04-15	47	1.5	0.48	126	2.46	3.981	5.012	2.512	2.818	2.512	2.818	2.512	2.818	1.585	2.512
sub6	2013-04-16	47	1.5	0.48	126	2.028	5.012	7.079	3.162	3.981	2.818	3.162	1.413	1.778	1.413	1.585
sub6	2013-04-16	47	1.5	0.48	126	0.504	0.631	0.794	0.501	0.631	0.398	0.447	0.355	0.631	0.562	0.631
sub6	2013-04-16	47	1.5	0.48	126	1.602	1.995	2.512	1.585	1.778	1.413	1.585	1.259	1.778	1.585	1.995
sub6	2013-04-16	47	1.5	0.48	126	1.903	3.162	3.981	2.818	3.162	2.818	3.548	1.259	1.413	1.122	1.259
sub6	2013-04-16	47	1.5	0.48	126	1.488	7.943	1.995	2.239	1.995	2.239	1.778	1.995	1	1.122	0.794
sub6	2013-04-16	47	1.5	0.48	126	1.895	1.995	2.512	2.239	2.818	1.995	2.239	1.778	1.995	1.585	1.778
sub6	2013-04-16	47	1.5	0.48	126	1.255	1	1.259	1	1.413	1.259	1.413	1.259	1.585	0.891	1.122
sub6	2013-04-16	47	1.5	0.48	126	3.185	3.162	4.467	3.548	4.467	3.981	4.467	2.512	2.818	2.512	2.818
sub6	2013-04-16	47	1.5	0.48	126	1.67	2.512	3.548	3.162	3.981	3.162	3.548	0.891	1.122	0.501	0.794
sub6	2013-04-16	47	1.5	0.48	126	1.835	7.943	2.239	2.512	1.778	2.239	1.585	1.778	1.585	2.239	1.585
sub6	2013-04-17	47	1.5	0.48	126	1.579	3.162	3.981	1.995	2.239	1.585	1.995	1.778	1.995	1	1.122
sub6	2013-04-17	47	1.5	0.48	126	0.319	0.398	0.501	0.398	0.447	0.355	0.447	0.282	0.316	0.2	0.316
sub6	2013-04-17	47	1.5	0.48	126	1.619	3.162	3.981	2.239	2.512	2.239	2.512	1.259	1.585	1	1.122
sub6	2013-04-17	47	1.5	0.48	126	1.895	1.995	2.512	1.995	2.239	1.995	2.239	1.778	1.995	1.585	1.778
sub6	2013-04-17	47	1.5	0.48	126	1.855	3.981	5.012	3.548	3.981	1.585	1.995	1.778	1.995	1.778	1.995
sub6	2013-04-17	47	1.5	0.48	126	0.599	0.631	0.794	0.501	0.794	0.631	0.708	0.562	0.631	0.501	0.562
sub6	2013-04-17	47	1.5	0.48	126	0.898	1.585	1.995	1.778	1.995	1.122	1.259	0.708	0.794	0.708	0.794
sub6	2013-04-17	47	1.5	0.48	126	0.822	2.512	3.162	2.239	2.512	1.122	1.259	0.562	0.631	0.562	0.794
sub6	2013-04-17	47	1.5	0.48	126	0.771	1.259	1.585	0.708	0.794	0.708	0.891	0.794	0.891	0.631	0.708
sub6	2013-04-17	47	1.5	0.48	126	2.094	2.512	3.162	1.995	2.239	1.995	2.239	1.995	2.239	1.585	2.512
sub6	2013-04-18	47	1.5	0.48	126	1.374	1.585	1.995	1.413	1.778	1.259	1.778	1.259	1.413	1.122	1.413
sub6	2013-04-18	47	1.5	0.48	126	0.675	3.162	4.467	1	1.122	0.708	0.794	0.501	0.708	0.631	0.708
sub6	2013-04-18	47	1.5	0.48	126	1.538	5.012	6.31	3.981	4.467	1.413	1.778	1.585	1.778	1.259	1.413
sub6	2013-04-18	47	1.5	0.48	126	1.844	1.995	2.512	1.413	1.995	1.585	1.778	1.413	1.995	1.778	2.512
sub6	2013-04-18	47	1.5	0.48	126	0.672	1	1.259	1.122	1.259	0.631	0.794	0.631	0.708	0.562	0.708
sub6	2013-04-18	47	1.5	0.48	126	0.977	3.162	3.981	1.778	1.995	1.122	1.259	0.794	1	0.794	0.891
sub6	2013-04-18	47	1.5	0.48	126	0.52	3.162	3.981	1	1.122	0.794	1.122	0.282	0.501	0.2	0.224
sub6	2013-04-18	47	1.5	0.48	126	1.264	1.995	2.512	2.239	2.512	1.778	1.995	0.794	1	0.891	1.122
sub6	2013-04-18	47	1.5	0.48	126	2.249	5.012	6.31	5.012	5.623	1.995	2.239	1.995	2.512	2.239	2.512
sub6	2013-04-18	47	1.5	0.48	126	0.428	0.501	0.631	0.447	0.501	0.447	0.501	0.447	0.501	0.316	0.355
sub6	2013-04-19	47	1.5	0.48	36	1.413	5.012	6.31	3.162	3.981	1.995	2.239	1	1.122	1	1.122
sub6	2013-04-19	47	1.5	0.48	36	1.642	1.585	2.239	1.259	1.778	1.413	1.778	0.891	1.995	1.778	1.995
sub6	2013-04-19	47	1.5	0.48	36	1.075	1.585	1.995	1.778	1.995	1.585	1.778	0.891	1	0.562	0.631
sub6	2013-04-19	47	1.5	0.48	36	0.85	0.501	0.708	0.224	0.251	0.224	0.282	0.224	0.251	0.224	0.316
sub6	2013-04-19	47	1.5	0.48	36	0.85	0.501	0.631	0.562	0.794	0.708	0.794	0.708	0.794	0.562	0.631
sub6	2013-04-19	47	1.5	0.48	126	0.95	1.995	2.512	0.891	1	0.794	1	0.891	1.122	0.891	1
sub6	2013-04-19	47	1.5	0.48	126	0.85	1.259	1.585	1.259	1.413	1	1.122	0.501	0.708	0.282	0.355
sub6	2013-04-19	47	1.5	0.48	126	1.053	2.512	3.162	2.512	2.818	1.122	1.413	0.891	1	0.891	1
sub6	2013-04-19	47	1.5	0.48	126	1.267	1.259	1.585	1.413	1.585	1.122	1.413	1.122	1.413	1.122	1.413
sub6	2013-04-19	47	1.5	0.48	126	2.048	3.981	5.012	2.512	3.162	2.818	3.162	1.778	1.995	1.122	1.413
sub7	2016-04-17	47	1.5	0.48	36	2.99	3.162	3.981	3.548	5.623	2.818	3.162	2.818	3.162	2.818	3.162
sub7	2016-04-17	47	1.5	0.48	36	3.629	5.012	6.31	3.981	4.467	3.981	5.012	2.818	3.162	2.818	3.981
sub7	2016-04-17	47	1.5	0.48	36	5.067	7.943	3.981	5.012	4.467	5.012	3.981	5.012	4.467	6.31	5.623
sub7	2016-04-17	47	1.5	0.48	36	3.717	3.981	5.623	5.012	6.31	3.981	4.467	3.162	3.981	3.162	3.548
sub7	2016-04-17	47	1.5	0.48	36	4.556	7.943	3.981	6.31	3.981	5.623	5.012	5.623	3.548	3.981	3.548
sub7	2016-04-17	47	1.5	0.48	36	2.853	7.943	5.623	6.31	5.012	5.623	1.995	2.512	2.239	2.512	2.239
sub7	2016-04-17	47	1.5	0.48	126	5.067	7.943	5.623	6.31	5.012	6.31	5.012	5.623	4.467	5.012	3.981
sub7	2016-04-17	47	1.5	0.48	126	5.928	7.943	5.012	5.623	3.981	7.079	5.012	5.623	4.467	7.079	6.31
sub7	2016-04-17	47	1.5	0.48	126	3.636	3.981	5.012	3.981	4.467	3.162	3.981	3.162	3.981	3.548	3.981
sub7	2016-04-17	47	1.5	0.48	126	3.974	3.162	4.467	3.548	3.981	3.162	3.981	3.548	5.623	3.548	3.981
sub7	2016-04-17	47	1.5	0.48	126	3.904	3.981	5.012	4.467	5.012	3.981	4.467	3.981	5.012	2.818	3.162
sub7	2016-04-17	47	1.5	0.48	126	3.781	3.162	3.981	3.548	3.981	3.548	3.981	3.548	3.981	3.162	4.467
sub7	2016-04-18	47	1.5	0.48	36	6.208	7.943	5.623	10	7.079	7.943	6.31	7.079	5.623	6.31	3.981
sub7	2016-04-18	47	1.5	0.48	36	3.234	1.995	3.162	2.239	3.548	3.162	3.548	3.162	3.548	2.818	3.162
sub7	2016-04-18	47	1.5	0.48	36	3.434	2.512	3.162	2.512	3.981	3.548	3.981	2.818	3.548	3.162	3.548
sub7	2016-04-18	47	1.5	0.48	36	3.14	3.162	3.981	3.548	3.981	3.548	3.981	2.818	3.162	2.512	2.818
sub7	2016-04-18	47	1.5	0.48	36	1.968	3.981	5.012	3.548	3.981	1.778	1.995	1.778	2.239	1.778	2.239
sub7	2016-04-18	47	1.5	0.48	36	2.85	3.162	3.981	3.548	3.981	3.162	3.548	2.512	2.818	2.239	2.818
sub7	2016-04-18	47	1.5	0.48	36	3.278	2.512	3.981	3.548	3.981	3.162	4.467	3.162	3.548	2.512	2.818
sub7	2016-04-18	47	1.5	0.48	36	2.492	3.162	3.981	3.548	4.467	2.512	2.818	2.512	2.818	1.778	2.512
sub7	2016-04-18	47	1.5	0.48	36	2.529	5.012	6.31	2.818	3.162	2.512	3.162	2.239	2.512	2.239	2.512
sub7	2016-04-18	47	1.5	0.48	36	1.608	1.585	1.995	1.585	1.995	1.413	1.585	1.413	1.585	1.413	2.239
sub7	2016-04-19	47	1.5	0.48	36	2.534	1.995	2.512	1.995	2.239	1.995	2.818	2.512	2.818	2.239	2.818
sub7	2016-04-19	47	1.5	0.48	36	1.887	2.512	3.162	1.995	2.512	1.778	1.995	1.778	1.995	1.778	1.995
sub7	2016-04-19	47	1.5	0.48	36	3.4	3.162	3.981	3.548	3.981	3.548	4.467	3.162	3.548	2.512	3.162
sub7	2016-04-19	47	1.5	0.48	36	2.095	1.995	2.512	2.239	3.981	1.995	2.512	1.778	1.995	1.778	2.512
sub7	2016-04-19	47	1.5	0.48	36	2.249	2.512	3.162	2.512	2.818	1.995	2.239	1.995	2.512	2.239	2.512
sub7	2016-04-19	47	1.5	0.48	36	2.787	3.162	4.467	3.981	4.467	2.512	2.818	2.512	3.548	2.512	2.818
sub7	2016-04-19	47	1.5	0.48	36	3.061	3.162	4.467	3.981	4.467	3.162	3.548	2.512	3.162	2.818	3.162
sub7	2016-04-19	47	1.5	0.48	36	3.415	3.162	3.981	3.548	3.981	3.162	4.467	3.548	3.981	2.512	2.818
sub7	2016-04-19	47	1.5	0.48	36	3.999	1.585	3.981	2.818	3.981	3.548	3.981	3.548	4.467	3.981	4.467
sub7	2016-04-19	47	1.5	0.48	36	2.62	3.162	3.981	3.162	3.548	2.512	2.818	2.239	2.818	2.512	2.818
sub7	2016-04-20	47	1.5	0.48	36	3.215	3.981	5.012	3.162	4.467	3.548	3.981	3.548	3.981	1.995	2.239
sub7	2016-04-20	47	1.5	0.48	36	3.579	2.512	3.162	2.818	3.162	2.818	3.981	3.548	3.981	3.162	3.981
sub7	2016-04-20	47	1.5	0.48	36	2.543	1.995	2.512	1.778	1.995	1.778	2.818	2.512	2.818	2.512	2.818
sub7	2016-04-20	47	1.5	0.48	36	3.127	1.259	1.995	1.778	3.548	2.818	3.981	2.818	3.162	2.818	3.162
sub7	2016-04-20	47	1.5	0.48	36	2.836	2.512	3.162	2.512	3.162	2.818	3.162	2.818	3.162	2.239	2.818
sub7	2016-04-20	47	1.5	0.48	36	1.818	1.585	1.995	1.585	2.239	1.778	1.995	1.778	1.995	1.585	1.778
sub7	2016-04-20	47	1.5	0.48	36	2.299	3.162	3.981	2.818	3.162	2.239	2.512	1.778	2.512	2.239	2.512
sub7	2016-04-20	47	1.5	0.48	36	3.089	1.995	2.512	2.239	2.818	2.512	3.981	2.512	3.162	2.818	3.548
sub7	2016-04-20	47	1.5	0.48	36	3.609	3.981	5.012	4.467	5.012	3.981	4.467	2.512	3.981	3.162	3.548
sub7	2016-04-20	47	1.5	0.48	36	2.809	1.995	3.162	1.995	2.239	1.995	2.818	2.512	3.548	2.818	3.162
sub7	2016-04-21	47	1.5	0.48	36	1.981	1.585	2.239	1.995	2.239	1.585	2.239	1.778	1.995	1.778	2.512
sub7	2016-04-21	47	1.5	0.48	36	3.369	1.995	2.818	1.995	2.512	2.239	3.162	2.818	3.981	3.548	4.467
sub7	2016-04-21	47	1.5	0.48	36	3.248	3.162	4.467	2.512	3.162	2.818	3.162	2.818	3.548	3.162	3.981
sub7	2016-04-21	47	1.5	0.48	36	2.569	3.981	5.012	2.239	2.818	2.512	2.818	2.512	2.818	2.239	2.512
sub7	2016-04-21	47	1.5	0.48	36	1.952	1.585	1.995	1.585	1.995	1.413	1.778	1.413	2.512	1.778	2.818
sub7	2016-04-21	47	1.5	0.48	36	3.632	5.012	6.31	3.981	5.012	3.548	4.467	3.981	4.467	2.512	2.818
sub7	2016-04-21	47	1.5	0.48	36	2.774	3.162	3.981	3.162	3.548	2.818	3.162	2.512	2.818	2.512	2.818
sub7	2016-04-21	47	1.5	0.48	36	3.364	2.512	3.162	2.512	2.818	2.512	3.162	2.512	4.467	3.548	3.981
sub7	2016-04-21	47	1.5	0.48	36	2.163	5.012	6.31	4.467	5.012	1.995	2.512	1.995	2.239	1.995	2.239
sub7	2016-04-21	47	1.5	0.48	36	3.427	3.162	3.981	3.162	3.548	3.162	3.548	3.162	3.548	3.162	3.981
sub7	2016-04-22	47	1.5	0.48	36	2.118	3.981	5.012	2.818	3.162	2.818	3.162	1.585	1.778	1.585	1.778
sub7	2016-04-22	47	1.5	0.48	36	1.336	1	1.259	1.122	1.413	1.259	1.413	1.259	1.413	1.259	1.413
sub7	2016-04-22	47	1.5	0.48	36	2.017	2.512	3.162	2.239	2.818	2.512	2.818	1.585	1.778	1.413	1.995
sub7	2016-04-22	47	1.5	0.48	36	1.826	1.995	2.512	1.778	1.995	1.778	1.995	1.778	1.995	1.413	1.995
sub7	2016-04-22	47	1.5	0.48	36	2.677	3.162	3.981	3.162	3.548	2.818	3.162	2.512	2.818	2.239	2.512
sub7	2016-04-22	47	1.5	0.48	36	1.936	2.512	3.162	2.239	2.512	1.778	2.239	1.995	2.239	1.585	1.778
sub7	2016-04-22	47	1.5	0.48	36	2.526	1.995	2.818	1.778	1.995	1.778	2.239	1.995	3.162	2.818	3.162
sub7	2016-04-22	47	1.5	0.48	36	2.895	1.259	2.512	1.585	3.162	2.818	3.162	2.512	2.818	2.512	3.548
sub7	2016-04-22	47	1.5	0.48	36	2.967	2.512	3.162	2.512	2.818	2.512	2.818	2.512	3.162	2.818	3.981
sub7	2016-04-22	47	1.5	0.48	36	2.591	2.512	3.548	1.995	2.239	1.995	2.818	2.512	2.818	2.239	3.162
sub7	2016-04-23	47	1.5	0.48	36	2.58	3.162	3.981	2.512	3.162	2.239	3.162	2.512	2.818	2.239	2.512
sub7	2016-04-23	47	1.5	0.48	36	2.366	3.162	3.981	2.818	3.162	2.512	3.162	1.995	2.239	1.778	2.512
sub7	2016-04-23	47	1.5	0.48	36	3.628	1.995	3.162	2.818	3.981	3.548	3.981	3.548	3.981	3.162	3.548
sub7	2016-04-23	47	1.5	0.48	36	2.58	3.162	3.981	2.239	2.512	2.239	2.512	2.239	2.818	2.512	3.162
sub7	2016-04-23	47	1.5	0.48	36	2.413	1.585	2.239	1.995	2.512	2.239	3.548	2.512	2.818	1.585	1.778
sub7	2016-04-23	47	1.5	0.48	36	3.004	2.512	3.162	2.818	5.012	3.162	3.548	2.818	3.162	2.512	2.818
sub7	2016-04-23	47	1.5	0.48	126	3.628	3.162	3.981	3.548	3.981	3.548	3.981	3.548	3.981	3.162	3.548
sub7	2016-04-23	47	1.5	0.48	126	3.298	3.162	3.981	3.162	3.548	2.818	3.548	3.162	3.548	3.162	3.548
sub7	2016-04-23	47	1.5	0.48	126	2.939	3.162	5.012	3.981	4.467	2.512	3.162	2.818	3.162	2.818	3.162
sub7	2016-04-23	47	1.5	0.48	126	4.953	7.943	5.012	5.623	4.467	5.623	5.012	5.623	4.467	5.012	3.981
sub7	2016-04-23	47	1.5	0.48	126	2.586	3.162	3.981	3.548	3.981	2.239	2.818	2.239	2.818	2.239	3.162
sub7	2016-04-23	47	1.5	0.48	126	3.089	3.162	3.981	3.548	3.981	3.548	3.981	2.512	3.162	2.512	2.818
sub8	2016-04-17	47	1.5	0.48	36	4.414	3.162	5.012	3.548	3.981	3.548	4.467	3.981	5.012	4.467	5.012
sub8	2016-04-17	47	1.5	0.48	36	3.017	3.162	5.012	3.548	3.981	2.512	3.548	2.512	3.162	2.818	3.548
sub8	2016-04-17	47	1.5	0.48	36	2.574	7.943	5.012	5.623	2.512	2.818	2.239	2.818	2.512	2.818	2.239
sub8	2016-04-17	47	1.5	0.48	36	3.299	7.943	4.467	5.012	4.467	5.012	2.818	3.162	2.818	3.162	2.818
sub8	2016-04-17	47	1.5	0.48	36	2.559	3.162	4.467	3.981	5.012	3.981	4.467	1.995	2.239	1.259	1.413
sub8	2016-04-17	47	1.5	0.48	36	3.765	3.981	5.623	5.012	5.623	3.548	3.981	3.548	3.981	3.548	3.981
sub8	2016-04-17	47	1.5	0.48	126	4.025	7.943	5.623	6.31	4.467	5.012	3.981	4.467	3.162	3.981	3.548
sub8	2016-04-17	47	1.5	0.48	126	2.871	3.981	5.623	3.981	4.467	2.512	2.818	2.239	3.981	2.512	3.162
sub8	2016-04-17	47	1.5	0.48	126	3.505	7.943	5.623	6.31	3.981	4.467	2.239	2.818	2.512	5.012	3.981
sub8	2016-04-17	47	1.5	0.48	126	2.366	1.995	2.512	2.239	2.818	1.995	3.162	1.778	2.512	2.239	2.512
sub8	2016-04-17	47	1.5	0.48	126	2.195	3.981	5.623	3.162	3.548	2.512	2.818	1.585	2.239	1.778	2.239
sub8	2016-04-17	47	1.5	0.48	126	3.055	2.512	3.162	2.818	3.162	2.818	3.162	2.818	3.162	2.818	3.548
sub8	2016-04-18	47	1.5	0.48	126	2.407	1.585	2.512	1.995	2.512	2.239	3.162	1.778	2.512	2.239	2.512
sub8	2016-04-18	47	1.5	0.48	126	2.049	2.512	3.162	1.778	1.995	1.585	2.239	1.995	2.239	1.995	2.239
sub8	2016-04-18	47	1.5	0.48	126	2.426	1.995	2.512	2.239	2.512	2.239	2.512	2.239	2.512	2.239	2.818
sub8	2016-04-18	47	1.5	0.48	126	2.799	3.981	5.012	2.818	3.981	3.162	3.548	2.512	2.818	2.239	2.512
sub8	2016-04-18	47	1.5	0.48	126	2.004	3.981	5.012	3.162	3.981	1.778	2.239	1.995	2.239	1.778	1.995
sub8	2016-04-18	47	1.5	0.48	126	2.971	2.512	3.162	2.512	2.818	2.512	3.548	3.162	3.548	2.239	2.818
sub8	2016-04-18	47	1.5	0.48	126	1.75	3.981	5.012	1.122	1.413	1.259	1.778	1.585	1.778	1.585	2.512
sub8	2016-04-18	47	1.5	0.48	126	3.673	7.943	3.981	5.012	3.548	4.467	3.548	3.981	3.548	3.981	2.512
sub8	2016-04-18	47	1.5	0.48	126	3.355	2.512	3.548	3.162	3.548	3.162	3.548	3.162	3.548	3.162	3.548
sub8	2016-04-18	47	1.5	0.48	126	2.882	3.162	3.981	3.162	3.548	2.818	3.162	2.818	3.162	2.512	2.818
sub8	2016-04-21	47	1.5	0.48	126	2.3	2.512	3.162	2.239	2.512	2.239	2.512	1.995	2.239	1.995	2.818
sub8	2016-04-21	47	1.5	0.48	126	2.631	1.995	2.512	1.995	3.162	2.818	3.162	2.239	2.512	2.239	2.818
sub8	2016-04-21	47	1.5	0.48	126	2.636	3.981	5.012	3.162	3.548	1.995	2.818	2.512	2.818	2.512	3.162
sub8	2016-04-21	47	1.5	0.48	126	1.291	1.585	1.995	1.778	2.512	1.585	1.778	1	1.122	1	1.259
sub8	2016-04-21	47	1.5	0.48	126	2.622	3.162	3.981	2.818	3.162	2.818	3.162	2.818	3.162	1.778	1.995
sub8	2016-04-21	47	1.5	0.48	126	1.88	1.585	1.995	1.778	2.512	1.995	2.512	1.778	1.995	1.413	1.585
sub8	2016-04-21	47	1.5	0.48	126	2.594	3.162	3.981	2.239	2.818	2.512	3.548	2.239	2.512	2.239	2.512
sub8	2016-04-21	47	1.5	0.48	126	2.866	1.995	2.512	2.239	3.981	3.162	3.548	2.512	2.818	1.995	3.162
sub8	2016-04-21	47	1.5	0.48	126	2.366	3.162	3.981	3.162	3.548	2.512	3.162	1.778	2.512	1.995	2.239
sub8	2016-04-21	47	1.5	0.48	126	3.306	7.943	3.981	4.467	2.818	3.162	2.818	3.981	3.162	3.548	3.162
sub8	2016-04-22	47	1.5	0.48	126	1.913	3.162	3.981	2.818	3.162	1.585	1.778	1.585	2.239	1.778	2.512
sub8	2016-04-22	47	1.5	0.48	126	1.07	0.794	1.122	1	1.122	0.891	1.122	0.891	1.259	1	1.259
sub8	2016-04-22	47	1.5	0.48	126	1.732	1.259	1.585	1.413	1.995	1.778	1.995	1.778	1.995	1.259	1.585
sub8	2016-04-22	47	1.5	0.48	126	1.502	0.631	1.778	1.585	1.778	1.259	1.585	1.259	1.413	1.259	2.239
sub8	2016-04-22	47	1.5	0.48	126	2.396	3.162	3.981	2.512	3.548	1.995	2.818	2.512	2.818	1.995	2.239
sub8	2016-04-22	47	1.5	0.48	126	1.903	1.995	2.512	1.585	1.995	1.585	1.778	1.585	2.239	1.995	2.239
sub8	2016-04-22	47	1.5	0.48	126	1.602	1.995	2.512	2.239	2.512	1.259	1.585	1.413	1.778	1.585	1.995
sub8	2016-04-22	47	1.5	0.48	126	0.496	0.501	0.631	0.501	0.794	0.447	0.501	0.447	0.501	0.447	0.631
sub8	2016-04-22	47	1.5	0.48	126	1.548	1.995	2.512	2.239	2.512	1.995	2.239	1.259	1.413	1.122	1.259
sub8	2016-04-22	47	1.5	0.48	126	0.934	2.512	3.162	1.122	1.259	1	1.122	0.794	0.891	0.794	1
sub8	2016-04-23	47	1.5	0.48	126	0.977	1.995	2.512	1.259	1.413	1.259	1.413	0.794	0.891	0.708	0.794
sub8	2016-04-23	47	1.5	0.48	126	0.648	3.162	3.981	2.512	2.818	0.631	0.708	0.562	0.631	0.562	0.794
sub8	2016-04-23	47	1.5	0.48	126	2.774	5.012	6.31	2.818	3.162	2.818	3.162	2.512	2.818	2.512	2.818
sub8	2016-04-23	47	1.5	0.48	126	1.451	1.585	1.995	1.413	1.585	1.413	1.778	1.259	1.413	1.259	1.585
sub8	2016-04-23	47	1.5	0.48	126	1.309	1.259	1.585	1.413	1.778	1.585	1.995	1.122	1.259	0.891	1
sub8	2016-04-23	47	1.5	0.48	126	1.912	1.995	2.512	1.585	1.778	1.413	1.995	1.778	2.512	1.778	1.995
sub8	2016-04-23	47	1.5	0.48	126	1.229	1.585	1.995	1.778	1.995	1.585	1.778	1	1.122	0.891	1
sub8	2016-04-23	47	1.5	0.48	126	0.578	0.631	1	0.562	0.708	0.562	0.631	0.501	0.562	0.501	0.708
sub8	2016-04-23	47	1.5	0.48	126	1.425	2.512	3.162	1.413	1.585	1.259	1.413	1.259	1.585	1.259	1.778
sub8	2016-04-23	47	1.5	0.48	126	1.149	1.585	2.239	0.891	1	0.891	1.122	0.794	1.413	1.259	1.413
sub8	2016-04-24	47	1.5	0.48	126	1.486	1.995	2.818	2.512	2.818	1.995	2.239	1.259	1.413	0.891	1.122
sub8	2016-04-24	47	1.5	0.48	126	1.101	1.585	1.995	1.585	1.778	1.413	2.239	0.891	1	0.501	0.562
sub8	2016-04-24	47	1.5	0.48	126	1.1	3.162	3.981	2.512	2.818	1.122	1.413	1.122	1.259	0.794	0.891
sub8	2016-04-24	47	1.5	0.48	126	1.422	3.981	5.012	2.512	3.162	1.413	1.778	1.259	1.413	1.259	1.413
sub8	2016-04-24	47	1.5	0.48	126	0.777	1.995	2.512	1	1.122	1	1.122	0.794	0.891	0.355	0.501
sub8	2016-04-24	47	1.5	0.48	126	0.696	1	1.259	0.891	1	0.794	0.891	0.562	0.794	0.501	0.631
sub8	2016-04-24	47	1.5	0.48	126	0.924	1.585	1.995	1	1.259	1.122	1.259	0.891	1	0.562	0.708
sub8	2016-04-24	47	1.5	0.48	126	1.026	1.259	1.585	1.259	1.585	1.122	1.413	1	1.122	0.708	0.794
sub8	2016-04-24	47	1.5	0.48	126	0.564	0.501	0.631	0.562	0.891	0.794	0.891	0.447	0.501	0.355	0.398
sub8	2016-04-24	47	1.5	0.48	126	1.035	1.259	1.778	1.122	1.259	1	1.122	1	1.585	0.708	0.794
sub8	2016-04-25	47	1.5	0.48	36	2.676	5.012	6.31	4.467	5.012	3.162	3.548	2.512	2.818	1.778	2.239
sub8	2016-04-25	47	1.5	0.48	36	2.335	5.012	6.31	4.467	5.623	1.995	2.512	2.239	2.512	2.239	2.512
sub8	2016-04-25	47	1.5	0.48	36	3.101	3.162	3.981	3.162	3.548	3.162	3.548	3.162	3.981	2.239	2.512
sub8	2016-04-25	47	1.5	0.48	36	2.259	2.512	3.548	2.512	2.818	1.995	2.818	1.995	2.239	1.995	2.512
sub8	2016-04-25	47	1.5	0.48	36	2.321	3.981	5.012	2.818	3.548	1.778	2.512	2.239	3.162	1.995	2.239
sub8	2016-04-25	47	1.5	0.48	36	2.101	1.585	3.162	2.818	3.162	2.239	2.818	1.778	1.995	1.778	1.995
sub8	2016-04-25	47	1.5	0.48	126	1.196	1.995	2.512	2.239	2.512	1.259	1.413	1.122	1.259	1	1.122
sub8	2016-04-25	47	1.5	0.48	126	1.634	1.995	2.818	1.995	2.239	1.995	2.239	1.122	1.413	1.259	1.778
sub8	2016-04-25	47	1.5	0.48	126	1.019	1.259	1.585	1.259	1.585	1.122	1.413	0.891	1	0.794	0.891
sub8	2016-04-25	47	1.5	0.48	126	0.85	1.259	1.585	1.122	1.259	0.794	0.891	0.631	0.708	0.631	0.794
sub8	2016-04-25	47	1.5	0.48	126	1.061	1.259	1.585	0.891	1.259	1	1.122	1	1.122	1	1.122
sub8	2016-04-25	47	1.5	0.48	126	1.42	1.995	2.512	2.239	2.512	1.778	2.239	1.122	1.259	1	1.122
sub9	2016-05-05	47	1.5	0.48	36	6.928	3.981	6.31	5.012	7.943	6.31	7.943	6.31	7.079	5.012	8.913
sub9	2016-05-05	47	1.5	0.48	36	6.561	3.162	5.012	3.981	5.012	4.467	6.31	5.623	7.943	7.079	7.943
sub9	2016-05-05	47	1.5	0.48	36	5.607	7.943	5.012	7.943	5.623	7.079	4.467	6.31	5.012	6.31	4.467
sub9	2016-05-05	47	1.5	0.48	36	4.758	7.943	2.512	7.079	6.31	7.079	3.548	5.623	4.467	5.012	2.818
sub9	2016-05-05	47	1.5	0.48	36	4.841	3.162	7.943	5.012	6.31	4.467	5.012	4.467	5.012	4.467	5.623
sub9	2016-05-05	47	1.5	0.48	36	4.465	7.943	3.981	5.012	3.981	5.012	4.467	5.012	4.467	5.012	2.818
sub9	2016-05-05	47	1.5	0.48	126	5.124	3.981	5.012	3.981	4.467	3.548	5.012	4.467	5.623	5.012	7.079
sub9	2016-05-05	47	1.5	0.48	126	5.318	3.981	5.012	3.981	5.623	5.012	5.623	5.012	5.623	5.012	5.623
sub9	2016-05-05	47	1.5	0.48	126	7.083	3.162	7.943	6.31	7.079	6.31	7.943	6.31	10	5.623	6.31
sub9	2016-05-05	47	1.5	0.48	126	4.76	5.012	6.31	4.467	6.31	4.467	5.012	3.981	5.012	4.467	5.623
sub9	2016-05-05	47	1.5	0.48	126	3.127	3.162	3.981	3.162	3.548	2.818	3.162	2.818	3.162	2.818	3.981
sub9	2016-05-06	47	1.5	0.48	126	6.145	5.012	7.943	5.623	6.31	5.623	7.079	6.31	7.079	4.467	6.31
sub9	2016-05-06	47	1.5	0.48	126	4.595	5.012	6.31	3.548	3.981	3.162	4.467	3.981	4.467	3.548	7.943
sub9	2016-05-06	47	1.5	0.48	126	4.243	7.943	5.012	6.31	4.467	5.012	3.548	4.467	3.981	4.467	3.981
sub9	2016-05-06	47	1.5	0.48	126	5.902	7.943	2.512	5.012	4.467	6.31	5.623	7.079	5.623	6.31	4.467
sub9	2016-05-06	47	1.5	0.48	126	5.59	5.012	12.589	7.079	7.943	7.079	10	3.548	4.467	3.981	4.467
sub9	2016-05-06	47	1.5	0.48	126	3.564	12.589	2.512	3.548	3.162	3.981	3.548	3.981	3.162	3.548	3.162
sub9	2016-05-06	47	1.5	0.48	126	5.662	3.981	6.31	5.012	7.079	5.623	7.079	5.012	5.623	5.012	5.623
sub9	2016-05-06	47	1.5	0.48	126	4.709	7.943	5.012	6.31	5.012	5.623	5.012	5.623	3.548	4.467	3.981
sub9	2016-05-06	47	1.5	0.48	126	4.454	3.981	6.31	5.012	5.623	5.012	5.623	3.548	3.981	3.548	5.012
sub9	2016-05-06	47	1.5	0.48	126	4.071	3.981	5.012	3.162	4.467	3.981	4.467	3.981	4.467	3.548	3.981
sub9	2016-05-07	47	1.5	0.48	126	3.466	5.012	6.31	5.012	5.623	2.818	3.162	2.818	4.467	3.548	3.981
sub9	2016-05-07	47	1.5	0.48	126	4.881	5.012	6.31	4.467	5.012	4.467	5.012	3.548	5.623	5.012	5.623
sub9	2016-05-07	47	1.5	0.48	126	3.455	7.943	3.981	5.012	3.981	4.467	2.512	3.981	3.548	3.981	2.239
sub9	2016-05-07	47	1.5	0.48	126	1.891	1.995	2.512	1.778	2.239	1.778	1.995	1.413	1.585	1.413	3.162
sub9	2016-05-07	47	1.5	0.48	126	2.187	2.512	3.981	2.239	2.512	2.239	2.818	1.778	1.995	1.778	2.512
sub9	2016-05-07	47	1.5	0.48	126	2.05	2.512	3.162	1.995	2.239	1.995	2.239	1.778	1.995	1.778	2.512
sub9	2016-05-07	47	1.5	0.48	126	2.58	2.512	5.012	3.981	5.012	2.239	2.512	2.239	3.162	2.512	2.818
sub9	2016-05-07	47	1.5	0.48	126	3.443	5.012	6.31	4.467	5.012	4.467	5.012	2.818	3.548	1.995	2.818
sub9	2016-05-07	47	1.5	0.48	126	3.111	3.981	6.31	3.981	4.467	2.818	3.162	2.818	3.162	2.239	4.467
sub9	2016-05-07	47	1.5	0.48	126	2.759	7.943	2.512	3.162	2.818	3.981	2.818	3.162	1.778	2.818	1.995
sub9	2016-05-08	47	1.5	0.48	126	2.946	2.512	3.162	2.512	3.162	2.818	3.162	2.818	3.548	2.512	2.818
sub9	2016-05-08	47	1.5	0.48	126	2.266	5.012	6.31	2.512	2.818	2.239	2.512	1.585	2.512	2.239	2.512
sub9	2016-05-08	47	1.5	0.48	126	2.85	2.512	3.981	2.818	3.162	2.818	3.162	2.818	3.548	2.239	2.512
sub9	2016-05-08	47	1.5	0.48	126	2.748	7.943	3.162	4.467	3.162	3.548	3.162	3.548	1.995	2.239	1.995
sub9	2016-05-08	47	1.5	0.48	126	3.125	1.995	3.981	3.162	3.981	2.818	3.162	2.512	3.548	3.162	3.548
sub9	2016-05-08	47	1.5	0.48	126	2.939	5.012	6.31	3.548	3.981	2.818	3.162	2.512	3.162	2.818	3.162
sub9	2016-05-08	47	1.5	0.48	126	2.677	5.012	6.31	5.012	5.623	2.818	3.162	2.512	2.818	2.239	2.512
sub9	2016-05-08	47	1.5	0.48	126	2.831	1.585	3.981	3.162	3.548	2.512	3.162	2.818	3.162	2.512	2.818
sub9	2016-05-08	47	1.5	0.48	126	2.244	2.512	3.981	2.512	2.818	2.239	3.162	1.778	1.995	1.778	2.512
sub9	2016-05-08	47	1.5	0.48	126	2.309	1.585	1.995	1.413	2.239	1.778	2.512	2.239	2.512	1.995	2.818
sub9	2016-05-09	47	1.5	0.48	126	2.103	3.162	3.981	1.413	1.778	1.585	2.512	1.995	2.239	1.778	2.512
sub9	2016-05-09	47	1.5	0.48	126	2.386	2.512	3.162	2.512	2.818	2.239	2.512	2.239	2.818	1.995	2.512
sub9	2016-05-09	47	1.5	0.48	126	2.939	7.943	5.012	6.31	2.512	3.162	2.818	3.162	2.512	3.162	2.818
sub9	2016-05-09	47	1.5	0.48	126	2.882	3.162	3.981	3.162	3.548	2.818	3.162	2.818	3.162	2.512	2.818
sub9	2016-05-09	47	1.5	0.48	126	2.882	3.162	3.981	3.162	3.548	2.818	3.162	2.818	3.162	2.512	2.818
sub9	2016-05-09	47	1.5	0.48	126	3.37	5.012	6.31	3.548	3.981	2.818	3.548	3.162	3.548	3.162	3.981
sub9	2016-05-09	47	1.5	0.48	126	2.232	2.512	3.981	3.162	3.548	2.512	2.818	1.778	1.995	1.778	2.512
sub9	2016-05-09	47	1.5	0.48	126	2.699	3.162	3.981	2.239	2.512	1.995	2.818	2.239	3.162	2.818	3.162
sub9	2016-05-09	47	1.5	0.48	126	2.882	3.162	3.981	2.818	3.162	2.818	3.162	2.818	3.162	2.512	2.818
sub9	2016-05-09	47	1.5	0.48	126	3.542	7.943	3.981	5.012	4.467	5.012	3.162	3.548	3.162	3.548	2.818
sub9	2016-05-10	47	1.5	0.48	126	2.335	2.512	3.162	2.239	2.512	2.239	2.512	2.239	2.512	1.995	2.512
sub9	2016-05-10	47	1.5	0.48	126	2.523	2.512	3.162	2.239	3.162	2.512	2.818	2.239	2.512	2.239	2.818
sub9	2016-05-10	47	1.5	0.48	126	2.443	2.512	3.162	1.995	2.818	2.239	2.512	2.239	2.512	1.995	3.162
sub9	2016-05-10	47	1.5	0.48	126	3.089	3.162	5.012	3.162	3.981	2.512	3.981	2.818	3.162	2.512	3.548
sub9	2016-05-10	47	1.5	0.48	126	3.125	3.981	5.012	3.548	5.623	2.512	3.548	3.162	3.548	2.818	3.162
sub9	2016-05-10	47	1.5	0.48	126	3.313	3.162	3.981	3.162	5.012	3.548	3.981	2.818	3.162	2.818	3.548
sub9	2016-05-10	47	1.5	0.48	126	3.927	3.981	5.012	3.548	4.467	3.548	4.467	3.548	3.981	3.548	4.467
sub9	2016-05-10	47	1.5	0.48	126	2.482	7.943	1.585	1.995	1.778	2.818	2.512	2.818	1.995	2.512	2.239
sub9	2016-05-10	47	1.5	0.48	126	1.487	1.259	1.585	1.259	2.239	1.259	1.413	1.259	1.585	1.413	1.995
sub9	2016-05-10	47	1.5	0.48	126	3.313	5.012	6.31	3.981	5.012	3.548	3.981	2.818	3.162	2.818	3.548
sub9	2016-05-11	47	1.5	0.48	36	3.427	5.012	6.31	3.548	3.981	3.162	3.548	3.162	3.548	3.162	3.981
sub9	2016-05-11	47	1.5	0.48	36	2.882	3.981	5.012	3.548	3.981	2.818	3.162	2.818	3.162	2.512	2.818
sub9	2016-05-11	47	1.5	0.48	36	3.089	7.943	2.512	3.981	3.162	3.548	3.162	3.981	2.512	2.818	2.512
sub9	2016-05-11	47	1.5	0.48	36	3.661	3.981	5.012	3.548	4.467	3.162	4.467	3.162	3.548	3.162	4.467
sub9	2016-05-11	47	1.5	0.48	36	4.363	5.012	7.943	2.818	5.012	3.548	3.981	3.548	5.012	4.467	5.623
sub9	2016-05-11	47	1.5	0.48	36	2.421	1.995	3.162	1.995	2.239	1.995	2.239	1.995	2.512	2.239	3.548
sub9	2016-05-11	47	1.5	0.48	126	3.587	7.943	3.981	5.012	3.981	4.467	3.548	3.981	3.162	3.548	2.818
sub9	2016-05-11	47	1.5	0.48	126	4.277	5.012	6.31	3.548	5.012	4.467	5.012	4.467	5.012	2.239	4.467
sub9	2016-05-11	47	1.5	0.48	126	2.906	7.943	3.162	5.012	3.548	3.981	3.162	3.548	2.239	2.512	1.995
sub9	2016-05-11	47	1.5	0.48	126	3.478	3.981	6.31	5.012	5.623	4.467	5.012	2.512	2.818	2.512	3.548
sub9	2016-05-11	47	1.5	0.48	126	3.133	3.981	5.012	3.548	3.981	3.162	3.981	2.818	3.162	2.512	3.162
sub9	2016-05-11	47	1.5	0.48	126	4.114	5.012	6.31	5.012	7.079	5.012	5.623	3.981	5.012	2.239	2.818

## Sheet: Raw_Fig3c
ID	date	contrast	spatial frequency (c/d)	standard deviation (deg)	orientation (deg)	threshold	preliminary reversals				experimental reversals
sub1	2013-06-06	47	1.5	0.48	36	4.862	5.012	6.31	4.467	5.623	4.467	5.623	3.981	5.012	4.467	5.623
sub1	2013-06-06	47	1.5	0.48	36	4.396	5.012	6.31	4.467	5.012	4.467	5.012	3.981	4.467	3.981	4.467
sub1	2013-06-06	47	1.5	0.48	36	3.773	7.943	5.012	5.623	5.012	5.623	3.162	3.981	3.162	3.548	3.162
sub1	2013-06-06	47	1.5	0.48	36	4.953	3.981	5.012	3.548	5.623	3.981	5.012	4.467	5.623	5.012	5.623
sub1	2013-06-06	47	1.5	0.48	36	4.709	3.162	3.981	3.548	3.981	3.548	5.623	5.012	5.623	3.981	4.467
sub1	2013-06-06	47	1.5	0.48	36	4.259	3.981	6.31	5.623	6.31	4.467	5.012	3.162	4.467	3.981	4.467
sub1	2013-06-12	47	1.5	0.48	36	4.977	5.012	6.31	5.012	6.31	4.467	5.623	3.981	5.012	4.467	6.31
sub1	2013-06-12	47	1.5	0.48	36	2.253	3.981	5.012	2.818	3.162	2.239	2.512	2.239	2.512	1.778	2.239
sub1	2013-06-12	47	1.5	0.48	36	5.058	3.162	5.623	5.012	5.623	4.467	5.623	4.467	5.012	4.467	6.31
sub1	2013-06-12	47	1.5	0.48	36	3.074	3.162	3.981	3.162	3.548	2.512	3.162	2.512	3.548	3.162	3.548
sub1	2013-06-12	47	1.5	0.48	36	3.999	3.162	4.467	3.981	4.467	3.981	4.467	3.548	3.981	3.548	4.467
sub2	2013-06-07	47	1.5	0.48	36	2.741	2.512	3.162	2.818	3.548	2.512	2.818	2.512	2.818	2.239	3.548
sub2	2013-06-07	47	1.5	0.48	36	2.559	3.162	3.981	2.512	2.818	2.239	2.512	2.239	2.818	1.995	3.548
sub2	2013-06-07	47	1.5	0.48	36	2.004	3.162	4.467	2.239	2.818	1.995	2.239	1.778	1.995	1.778	2.239
sub2	2013-06-07	47	1.5	0.48	36	1.599	1.995	2.818	1.778	1.995	1.585	1.778	1.413	1.778	1.259	1.778
sub2	2013-06-07	47	1.5	0.48	36	1.505	1.585	2.239	1.778	1.995	1.585	1.778	1.413	1.585	1.259	1.413
sub2	2013-06-07	47	1.5	0.48	36	2.611	2.512	3.981	3.162	3.548	2.512	3.162	2.818	3.981	1.413	1.778
sub2	2013-06-13	47	1.5	0.48	36	2.067	1.995	2.512	2.239	2.512	2.239	2.512	1.778	2.512	1.585	1.778
sub2	2013-06-13	47	1.5	0.48	36	2.036	1.259	1.778	1.585	1.778	1.585	1.995	1.585	2.818	1.995	2.239
sub2	2013-06-13	47	1.5	0.48	36	2.117	1.585	2.239	1.995	2.239	1.995	2.239	1.995	2.239	1.995	2.239
sub2	2013-06-13	47	1.5	0.48	36	1.561	3.162	3.981	1.413	1.585	1.259	1.995	1.585	1.995	1.122	1.413
sub2	2013-06-13	47	1.5	0.48	36	1.17	1	1.413	1.259	1.585	1.122	1.259	1	1.259	1.122	1.259
sub3	2013-06-07	47	1.5	0.48	126	3.767	5.012	6.31	5.012	6.31	3.162	5.012	2.818	3.981	3.162	4.467
sub3	2013-06-07	47	1.5	0.48	126	4.88	5.012	6.31	5.623	6.31	5.623	6.31	5.012	5.623	3.162	3.548
sub3	2013-06-07	47	1.5	0.48	126	3.628	5.012	7.079	4.467	5.623	3.548	3.981	3.548	3.981	3.162	3.548
sub3	2013-06-07	47	1.5	0.48	126	4.007	3.981	6.31	4.467	5.012	3.981	4.467	3.981	4.467	3.162	3.981
sub3	2013-06-07	47	1.5	0.48	126	3.466	3.981	5.012	3.548	4.467	3.162	4.467	2.818	3.548	2.818	3.981
sub3	2013-06-07	47	1.5	0.48	126	2.574	2.512	3.548	2.512	3.162	2.239	2.818	2.512	2.818	2.239	2.818
sub3	2013-06-13	47	1.5	0.48	126	4.862	3.981	6.31	4.467	6.31	3.981	5.623	4.467	5.012	4.467	5.623
sub3	2013-06-13	47	1.5	0.48	126	2.695	5.012	6.31	5.623	6.31	3.162	3.548	1.585	2.818	2.239	2.818
sub3	2013-06-13	47	1.5	0.48	126	2.762	3.981	5.012	2.512	2.818	2.512	2.818	1.995	2.239	1.995	5.012
sub3	2013-06-13	47	1.5	0.48	126	3.125	1.995	2.818	2.512	3.548	3.162	3.548	3.162	3.548	2.512	2.818
sub3	2013-06-13	47	1.5	0.48	126	4.272	2.512	3.548	3.162	5.623	4.467	5.623	3.548	4.467	3.548	3.981
sub4	2013-06-08	47	1.5	0.48	126	3.75	5.012	6.31	3.548	4.467	3.981	5.012	3.162	3.548	2.818	3.981
sub4	2013-06-08	47	1.5	0.48	126	2.973	3.981	5.012	4.467	5.012	2.818	3.981	2.818	3.162	2.239	2.818
sub4	2013-06-08	47	1.5	0.48	126	4.243	3.162	3.981	3.548	4.467	3.548	4.467	3.981	4.467	3.981	5.012
sub4	2013-06-08	47	1.5	0.48	126	1.519	1.585	1.995	1.259	1.585	1.413	1.995	1.122	1.585	1.413	1.585
sub4	2013-06-08	47	1.5	0.48	126	2.011	2.512	3.162	2.239	3.548	2.239	2.818	2.239	2.512	1	1.259
sub4	2013-06-08	47	1.5	0.48	126	1.863	2.512	3.162	1.778	2.239	1.995	2.239	1.585	1.995	1.585	1.778
sub4	2013-06-15	47	1.5	0.48	126	1.418	5.012	6.31	2.818	3.548	1.585	1.778	1.413	1.585	0.891	1.259
sub4	2013-06-15	47	1.5	0.48	126	2.579	1.995	3.162	2.818	3.162	2.512	2.818	1.995	2.818	2.512	2.818
sub4	2013-06-15	47	1.5	0.48	126	1.788	3.981	5.012	2.512	2.818	1.995	2.239	1.995	2.239	1	1.259
sub4	2013-06-15	47	1.5	0.48	126	0.986	1.259	1.585	1	1.122	0.891	1	0.891	1.122	0.891	1.122
sub4	2013-06-15	47	1.5	0.48	126	1.542	2.512	3.162	1.995	2.512	1.259	1.585	1.413	1.585	1.413	1.995
sub5	2013-06-08	47	1.5	0.48	36	2.276	7.943	5.623	6.31	3.162	3.548	2.239	2.512	1.778	1.995	1.585
sub5	2013-06-08	47	1.5	0.48	36	3.004	3.981	5.012	2.512	3.548	3.162	3.548	2.818	3.162	2.512	2.818
sub5	2013-06-08	47	1.5	0.48	36	4.932	1.995	5.012	3.548	5.623	5.012	5.623	4.467	5.012	4.467	5.012
sub5	2013-06-08	47	1.5	0.48	36	4.943	7.943	5.012	6.31	5.012	5.623	4.467	5.012	4.467	5.623	4.467
sub5	2013-06-08	47	1.5	0.48	36	3.764	3.981	5.012	4.467	5.012	3.162	7.079	3.548	3.981	1.995	2.818
sub5	2013-06-08	47	1.5	0.48	36	2.631	3.162	3.981	3.162	3.548	2.818	3.162	2.239	2.818	2.239	2.512
sub5	2013-06-14	47	1.5	0.48	36	4.568	5.012	6.31	5.623	6.31	4.467	5.012	4.467	5.012	3.981	4.467
sub5	2013-06-14	47	1.5	0.48	36	4.862	5.012	6.31	5.623	7.079	5.012	5.623	4.467	5.623	3.981	4.467
sub5	2013-06-14	47	1.5	0.48	36	3.7	5.012	6.31	5.012	5.623	3.548	3.981	3.548	3.981	3.162	3.981
sub5	2013-06-14	47	1.5	0.48	36	3.112	5.012	6.31	3.981	4.467	3.162	3.548	2.818	3.162	2.818	3.162
sub5	2013-06-14	47	1.5	0.48	36	1.895	1.585	1.995	1.585	1.995	1.585	2.239	1.778	1.995	1.778	1.995
sub6	2016-04-15	47	1.5	0.48	36	4.098	3.162	3.981	3.548	5.012	3.548	4.467	3.548	5.012	3.548	4.467
sub6	2016-04-15	47	1.5	0.48	36	5.993	5.012	6.31	5.623	7.079	6.31	7.079	5.623	6.31	5.012	5.623
sub6	2016-04-15	47	1.5	0.48	36	4.487	5.012	6.31	3.981	4.467	3.981	4.467	3.981	5.012	4.467	5.012
sub6	2016-04-15	47	1.5	0.48	36	5.277	12.589	7.943	8.913	4.467	5.623	5.012	7.079	4.467	5.012	4.467
sub6	2016-04-15	47	1.5	0.48	36	2.99	2.512	3.162	2.512	3.162	2.818	3.162	2.818	3.162	2.818	3.162
sub6	2016-04-15	47	1.5	0.48	36	4.169	3.162	3.981	3.548	3.981	3.548	4.467	3.548	6.31	3.162	3.981
sub6	2016-04-20	47	1.5	0.48	36	4.658	3.981	5.623	5.012	5.623	3.981	5.012	4.467	5.012	4.467	5.012
sub6	2016-04-20	47	1.5	0.48	36	3.936	7.943	5.012	5.623	3.548	3.981	3.548	5.012	3.548	3.981	3.548
sub6	2016-04-20	47	1.5	0.48	36	2.179	3.981	5.623	2.512	3.162	1.259	1.413	1.259	3.162	2.818	3.162
sub6	2016-04-20	47	1.5	0.48	36	1.786	1.995	2.818	1.995	2.239	1.778	1.995	1.585	1.995	1.585	1.778
sub6	2016-04-20	47	1.5	0.48	36	5.891	3.981	5.012	4.467	7.079	6.31	7.079	5.012	5.623	5.012	6.31
sub7	2016-04-20	47	1.5	0.48	126	3.536	5.012	6.31	3.981	5.012	3.548	4.467	3.162	3.548	2.512	3.981
sub7	2016-04-20	47	1.5	0.48	126	3.922	3.981	5.012	3.981	4.467	3.548	5.012	3.981	5.012	2.818	3.162
sub7	2016-04-20	47	1.5	0.48	126	3.595	5.012	6.31	4.467	5.012	2.818	3.981	3.162	4.467	3.162	3.981
sub7	2016-04-20	47	1.5	0.48	126	3.039	5.012	6.31	5.623	6.31	1.995	3.162	2.818	3.548	3.162	3.548
sub7	2016-04-20	47	1.5	0.48	126	2.931	0.794	1.122	1	2.239	1.995	2.818	2.512	3.548	3.162	3.548
sub7	2016-04-20	47	1.5	0.48	126	2.009	1.585	2.239	1.995	2.512	1.995	2.512	1.778	1.995	1.778	1.995
sub7	2016-04-26	47	1.5	0.48	126	3.241	3.981	5.012	2.818	3.162	2.818	3.548	2.818	3.548	3.162	3.548
sub7	2016-04-26	47	1.5	0.48	126	2.426	5.012	7.079	3.981	4.467	2.239	2.818	2.239	2.512	2.239	2.512
sub7	2016-04-26	47	1.5	0.48	126	3.152	2.512	3.162	2.818	3.981	3.162	3.981	2.239	3.162	2.818	3.548
sub7	2016-04-26	47	1.5	0.48	126	3.579	3.981	5.012	3.981	5.012	2.818	3.981	3.548	3.981	3.162	3.981
sub7	2016-04-26	47	1.5	0.48	126	2.947	10	3.981	4.467	3.548	4.467	3.162	3.548	1.995	2.512	1.995
sub8	2016-04-20	47	1.5	0.48	36	3.234	5.012	6.31	3.162	3.981	3.162	3.548	3.162	3.548	2.818	3.162
sub8	2016-04-20	47	1.5	0.48	36	3.313	2.512	3.162	2.512	3.162	2.818	3.548	2.818	3.981	3.162	3.548
sub8	2016-04-20	47	1.5	0.48	36	3.741	5.012	6.31	3.548	3.981	3.162	3.548	2.818	4.467	3.981	4.467
sub8	2016-04-20	47	1.5	0.48	36	2.625	1.585	1.995	1.585	1.778	1.585	2.818	2.512	3.162	2.512	3.162
sub8	2016-04-20	47	1.5	0.48	36	2.454	1.585	2.239	1.995	2.512	1.995	2.239	1.995	3.162	2.512	2.818
sub8	2016-04-20	47	1.5	0.48	36	2.946	2.512	3.981	3.548	5.012	2.818	3.548	2.818	3.162	2.512	2.818
sub8	2016-04-27	47	1.5	0.48	36	3.243	7.943	3.981	4.467	3.981	5.012	3.548	3.981	2.512	2.818	1.585
sub8	2016-04-27	47	1.5	0.48	36	2.375	2.512	3.162	2.239	2.512	2.239	2.512	2.239	2.512	2.239	2.512
sub8	2016-04-27	47	1.5	0.48	36	2.308	7.943	2.818	3.548	2.818	3.548	1.778	1.995	1.778	2.512	2.239
sub8	2016-04-27	47	1.5	0.48	36	3.124	1.995	2.512	2.239	3.162	2.818	4.467	3.162	3.548	2.239	2.512
sub8	2016-04-27	47	1.5	0.48	36	2.212	1.995	2.512	1.995	2.239	1.995	2.512	2.239	2.512	1.778	2.239
