# Supplementary material for: Bottom-up and top-down influences at untrained conditions determine perceptual learning specificity and transfer
Source: eLife. 2016 Jul 5;5:e14614. doi: 10.7554/eLife.14614 (PMC4965262; doi:10.7554/eLife.14614)
Supplement: Figure 4—source data 1. — The other data sheets contain raw staircase data for 4b, 4c, and 4d. DOI: http://dx.doi.org/10.7554/eLife.14614.010 [file elife-14614-fig4-data1.xlsx]

## Sheet: Summary_Fig4
Figure 4b
Average(N = 8)
Session	Trained	error	Transfer	error
day1	6.82517	0.849723	6.48994	0.630219
day2	5.44053	0.684282
day3	4.93405	0.481697
day4	4.73784	0.402365
day5	4.09635	0.29396
day6	4.28382	0.548394
day7	4.56564	0.54392	4.24332	0.70189
IMP	0.323616	0.0429331	0.352776	0.0638461
TI			1.13458	0.173571
Individuals
SUB1	Trained	error	Transfer	error		SUB2	Trained	error	Transfer	error		SUB3	Trained	error	Transfer	error
day1	12.0678	0.450888	10.7186	1.24378		day1	5.77676	1.01975	6.60946	0.440824		day1	4.78706	0.422192	5.77522	0.797931
day2	9.74595	0.634443				day2	4.14022	0.421046				day2	4.69605	0.320531
day3	7.22161	0.477658				day3	3.16569	0.240302				day3	3.95602	0.221737
day4	6.09957	0.408488				day4	3.06387	0.185627				day4	4.18499	0.245462
day5	4.44913	0.35544				day5	3.17223	0.203795				day5	3.30535	0.146393
day6	6.55394	0.362046				day6	2.55972	0.210953				day6	3.65995	0.207834
day7	7.02749	0.792115	8.71105	0.995728		day7	3.67607	0.41141	2.57204	0.289603		day7	3.37573	0.490037	3.87769	0.343817
IMP	0.417665		0.187295			IMP	0.363645		0.610855			IMP	0.294821		0.328564
TI			0.448433			TI			1.67981			TI			1.11445
SUB4	Trained	error	Transfer	error		SUB5	Trained	error	Transfer	error		SUB6	Trained	error	Transfer	error
day1	7.70193	0.705532	5.75451	0.474906		day1	5.79975	0.521389	6.53234	0.531182		day1	4.99349	0.716145	5.16959	0.270007
day2	5.69492	0.382851				day2	3.86719	0.222629				day2	3.9134	0.292623
day3	6.03286	0.448696				day3	3.89897	0.188215				day3	4.91339	0.253453
day4	6.02722	0.409266				day4	3.89448	0.331066				day4	3.84398	0.19314
day5	5.4546	0.314164				day5	3.30343	0.362632				day5	4.0808	0.270583
day6	5.4946	0.389039				day6	2.19113	0.319885				day6	3.7836	0.154085
day7	6.23717	0.241259	3.69965	0.429523		day7	2.56083	0.398477	2.40739	0.370643		day7	3.74228	0.384044	3.43967	0.496615
IMP	0.190181		0.357088			IMP	0.558458		0.631465			IMP	0.250569		0.334633
TI			1.87762			TI			1.13073			TI			1.33549
SUB7	Trained	error	Transfer	error		SUB8	Trained	error	Transfer	error
day1	5.61814	0.500576	5.33563	0.563519		day1	7.85644	0.548886	6.02423	0.496555
day2	6.17832	0.529778				day2	5.28821	0.416486
day3	4.33209	0.251307				day3	5.95173	0.381824
day4	5.58073	0.397645				day4	5.20786	0.28142
day5	4.03837	0.234758				day5	4.96689	0.384686
day6	4.25069	0.294113				day6	5.77694	0.292182
day7	4.44847	0.252618	4.38964	0.546769		day7	5.4571	0.254869	4.84945	0.675334
IMP	0.208194		0.177296			IMP	0.305398		0.19501
TI			0.851591			TI			0.638543
Figure 4c
Average(N = 8)
Session	Trained	error
day1	5.5078	0.400232
day2
day3
day4
day5
day6
day7	5.22195	0.501821
IMP	0.0412079	0.0913356
Individuals
SUB1	Exposed	error		SUB2	Exposed	error		SUB3	Exposed	error
day1	5.37174	0.398554		day1	6.59094	0.324237		day1	4.29411	0.415663
day2				day2				day2
day3				day3				day3
day4				day4				day4
day5				day5				day5
day6				day6				day6
day7	7.6134	0.601486		day7	5.50995	0.703343		day7	4.31604	0.452345
IMP	-0.417306			IMP	0.164012			IMP	-0.00510766
SUB4	Exposed	error		SUB5	Exposed	error		SUB6	Exposed	error
day1	7.11588	0.868239		day1	5.94491	0.758474		day1	6.199	0.858074
day2				day2				day2
day3				day3				day3
day4				day4				day4
day5				day5				day5
day6				day6				day6
day7	5.5591	0.248314		day7	5.57961	1.03834		day7	5.41096	0.355604
IMP	0.218776			IMP	0.0614468			IMP	0.127124
SUB7	Exposed	error		SUB8	Exposed	error
day1	4.29353	0.380462		day1	4.25224	0.413759
day2				day2
day3				day3
day4				day4
day5				day5
day6				day6
day7	5.24811	0.777492		day7	2.53839	0.448426
IMP	-0.22233			IMP	0.403047
Figure 4d
Average(N = 8)
Session	Trained	error	Transfer	error
day1	6.22044	0.429834	5.98793	0.533531
day2	5.22848	0.386363
day3	5.09202	0.37284
day4	4.62574	0.4184
day5	4.22492	0.264362
day6	4.03574	0.239011
day7	4.1621	0.272072	5.58096	0.505683
IMP	0.323354	0.0343287	0.0595817	0.0426894
TI			0.130552	0.11248
Individuals
SUB1	Trained	error	Transfer	error		SUB2	Trained	error	Transfer	error		SUB3	Trained	error	Transfer	error
DAY1	7.80669	1.00728	9.08348	0.783735		DAY1	7.58587	0.602255	7.11375	0.653742		DAY1	5.40389	0.533521	4.51813	0.602337
DAY2	6.82606	0.331346				DAY2	6.08435	0.423629				DAY2	4.37937	0.311749
DAY3	7.25404	0.502921				DAY3	5.0034	0.303658				DAY3	3.8674	0.253316
DAY4	6.7212	0.373935				DAY4	5.2057	0.308635				DAY4	3.97784	0.370504
DAY5	5.48717	0.407494				DAY5	4.71353	0.268531				DAY5	3.41694	0.231851
DAY6	5.3209	0.362222				DAY6	4.57444	0.312193				DAY6	3.65712	0.238536
DAY7	5.53808	0.819228	8.81357	1.47985		DAY7	4.13879	0.280025	5.05245	0.541374		DAY7	3.92082	0.433705	4.99323	0.625247
IMP	0.290599		0.0297143			IMP	0.454408		0.289763			IMP	0.274444		-0.105153
TI			0.102252			TI			0.637672			TI			-0.383148
SUB4	Trained	error	Transfer	error		SUB5	Trained	error	Transfer	error		SUB6	Trained	error	Transfer	error
DAY1	5.56552	0.886673	6.4232	0.328134		DAY1	4.62233	0.507498	4.89931	0.294832		DAY1	5.10408	0.433408	5.20032	0.569286
DAY2	4.78035	0.27891				DAY2	4.67764	0.305881				DAY2	3.54568	0.237618
DAY3	4.70717	0.460162				DAY3	4.96076	0.319636				DAY3	4.36588	0.337373
DAY4	3.80202	0.235886				DAY4	3.97704	0.293599				DAY4	3.34139	0.219933
DAY5	4.50741	0.339206				DAY5	3.35775	0.287946				DAY5	3.65498	0.315511
DAY6	4.44801	0.348717				DAY6	3.74798	0.305804				DAY6	3.67399	0.305743
DAY7	4.77294	0.653608	6.50465	1.11358		DAY7	3.1761	0.373328	4.89753	0.409175		DAY7	3.47854	0.380334	4.73333	0.577465
IMP	0.142409		-0.0126819			IMP	0.312879		0.000363865			IMP	0.31848		0.0898007
TI			-0.0890526			TI			0.00116296			TI			0.281967
SUB7	Trained	error	Transfer	error		SUB8	Trained	error	Transfer	error
DAY1	6.44495	0.529811	5.13671	0.341936		DAY1	7.23015	#REF!	5.52854	0.435033
DAY2	6.23476	0.916523				DAY2	5.29958	0.37101
DAY3	5.93399	0.412464				DAY3	4.64353	0.270434
DAY4	5.8963	0.552439				DAY4	4.08445	0.300242
DAY5	4.68424	0.376391				DAY5	3.97738	0.215596
DAY6	3.44977	0.424215				DAY6	3.41374	0.225904
DAY7	3.7003	0.50749	5.01113	0.971257		DAY7	4.57122	0.465311	4.64177	0.311005
IMP	0.425861		0.0244476			IMP	0.367756		0.160399
TI			0.0574075			TI			0.436155
Figure 4e
Improvement
	Trained	error	Transfer	error
Fig 4b	0.323616	0.0429331	0.352776	0.0638461
			Exposed	error
Fig 4c			0.0412079	0.0913356
	Trained	error	Transfer	error
Fig 4d	0.323354	0.0343287	0.0595817	0.0426894
Figure 4f
Transfer index
	TI	err
Fig 4b	1.13458	0.173571
Fig 4d	0.130552	0.11248

## Sheet: Raw_Fig4b
ID	date	contrast	spatial frequency (c/d)	standard deviation (deg)	orientation (deg)	Location	threshold	preliminary reversals				experimental reversals
Sub1	2015-01-17	47	3	0.29	90	dr	13.75	13.4898	10.7154	15.1358	13.4898	15.1358	13.4898	16.9827	12.0228	13.4898	12.0228
Sub1	2015-01-17	47	3	0.29	90	dr	11.57	16.9827	10.7154	13.4898	10.7154	13.4898	10.7154	12.0228	10.7154	12.0228	10.7154
Sub1	2015-01-17	47	3	0.29	90	dr	11.79	16.9827	6.7609	13.4898	10.7154	12.0228	10.7154	15.1358	10.7154	12.0228	10.7154
Sub1	2015-01-17	47	3	0.29	90	dr	11.13	10.7154	16.9827	9.5501	12.0228	7.5859	9.5501	8.5115	15.1358	13.4898	15.1358
Sub1	2015-01-17	47	3	0.29	90	dr	12.26	6.7609	10.7154	7.5859	9.5501	8.5115	10.7154	9.5501	19.0549	13.4898	15.1358
Sub1	2015-01-17	47	3	0.29	90	ul	10.72	8.5115	10.7154	8.5115	9.5501	8.5115	10.7154	9.5501	12.0228	10.7154	13.4898
Sub1	2015-01-17	47	3	0.29	90	ul	15.14	26.9158	13.4898	19.0549	12.0228	21.38	16.9827	19.0549	10.7154	13.4898	12.0228
Sub1	2015-01-17	47	3	0.29	90	ul	9.02	8.5115	16.9827	12.0228	13.4898	7.5859	8.5115	7.5859	10.7154	9.5501	10.7154
Sub1	2015-01-17	47	3	0.29	90	ul	8.04	10.7154	13.4898	9.5501	10.7154	7.5859	8.5115	6.7609	9.5501	7.5859	8.5115
Sub1	2015-01-17	47	3	0.29	90	ul	12.02	16.9827	5.3704	6.7609	6.0257	10.7154	9.5501	15.1358	12.0228	13.4898	12.0228
Sub1	2015-01-18	47	3	0.29	90	dr	11.57	21.38	16.9827	23.9887	21.38	23.9887	10.7154	16.9827	7.5859	10.7154	6.7609
Sub1	2015-01-18	47	3	0.29	90	dr	9.55	8.5115	10.7154	7.5859	10.7154	7.5859	9.5501	8.5115	9.5501	8.5115	15.1358
Sub1	2015-01-18	47	3	0.29	90	dr	10.51	10.7154	13.4898	6.0257	9.5501	6.7609	10.7154	7.5859	13.4898	12.0228	15.1358
Sub1	2015-01-18	47	3	0.29	90	dr	15.14	8.5115	16.9827	12.0228	15.1358	10.7154	16.9827	15.1358	21.38	13.4898	15.1358
Sub1	2015-01-18	47	3	0.29	90	dr	9.74	8.5115	13.4898	7.5859	10.7154	8.5115	12.0228	10.7154	12.0228	7.5859	8.5115
Sub1	2015-01-18	47	3	0.29	90	dr	8.35	6.7609	8.5115	6.0257	7.5859	6.7609	8.5115	7.5859	9.5501	8.5115	9.5501
Sub1	2015-01-18	47	3	0.29	90	dr	5.8	8.5115	10.7154	7.5859	9.5501	6.7609	7.5859	4.7864	6.0257	4.7864	5.3704
Sub1	2015-01-18	47	3	0.29	90	dr	6.76	4.2659	6.7609	4.7864	5.3704	4.2659	7.5859	6.7609	8.5115	6.7609	7.5859
Sub1	2015-01-18	47	3	0.29	90	dr	8.84	10.7154	13.4898	8.5115	10.7154	8.5115	9.5501	7.5859	8.5115	7.5859	12.0228
Sub1	2015-01-18	47	3	0.29	90	dr	8.84	8.5115	13.4898	8.5115	10.7154	7.5859	8.5115	7.5859	9.5501	8.5115	12.0228
Sub1	2015-01-18	47	3	0.29	90	dr	11.13	10.7154	16.9827	10.7154	12.0228	9.5501	12.0228	10.7154	12.0228	10.7154	12.0228
Sub1	2015-01-18	47	3	0.29	90	dr	8.84	8.5115	13.4898	10.7154	13.4898	9.5501	10.7154	7.5859	8.5115	7.5859	9.5501
Sub1	2015-01-18	47	3	0.29	90	dr	11.79	10.7154	13.4898	9.5501	12.0228	10.7154	12.0228	10.7154	12.0228	10.7154	15.1358
Sub1	2015-01-18	47	3	0.29	90	dr	15.14	8.5115	13.4898	8.5115	13.4898	12.0228	15.1358	13.4898	19.0549	15.1358	16.9827
Sub1	2015-01-18	47	3	0.29	90	dr	8.84	16.9827	8.5115	10.7154	8.5115	10.7154	8.5115	12.0228	7.5859	8.5115	6.7609
Sub1	2015-01-18	47	3	0.29	90	dr	9.74	16.9827	6.7609	10.7154	9.5501	10.7154	8.5115	10.7154	9.5501	10.7154	8.5115
Sub1	2015-01-19	47	3	0.29	90	dr	9.92	10.7154	13.4898	8.5115	10.7154	9.5501	12.0228	9.5501	10.7154	8.5115	9.5501
Sub1	2015-01-19	47	3	0.29	90	dr	10.92	16.9827	13.4898	16.9827	13.4898	15.1358	12.0228	13.4898	8.5115	9.5501	8.5115
Sub1	2015-01-19	47	3	0.29	90	dr	6.38	8.5115	13.4898	9.5501	10.7154	7.5859	8.5115	6.7609	7.5859	4.2659	4.7864
Sub1	2015-01-19	47	3	0.29	90	dr	7.44	8.5115	13.4898	6.7609	7.5859	6.0257	10.7154	7.5859	8.5115	6.0257	6.7609
Sub1	2015-01-19	47	3	0.29	90	dr	7.16	16.9827	13.4898	16.9827	7.5859	9.5501	6.7609	7.5859	6.7609	7.5859	5.3704
Sub1	2015-01-19	47	3	0.29	90	dr	5.07	5.3704	6.7609	5.3704	6.0257	4.2659	5.3704	4.2659	5.3704	4.7864	6.7609
Sub1	2015-01-19	47	3	0.29	90	dr	6.14	6.7609	8.5115	5.3704	6.7609	5.3704	6.7609	6.0257	7.5859	5.3704	6.0257
Sub1	2015-01-19	47	3	0.29	90	dr	6.14	6.7609	8.5115	4.7864	5.3704	4.7864	7.5859	6.0257	6.7609	5.3704	6.7609
Sub1	2015-01-19	47	3	0.29	90	dr	5.8	4.2659	8.5115	6.7609	7.5859	6.7609	7.5859	4.7864	5.3704	4.7864	6.0257
Sub1	2015-01-19	47	3	0.29	90	dr	4.88	3.3885	4.2659	3.3885	5.3704	4.2659	4.7864	4.2659	6.0257	4.7864	5.3704
Sub1	2015-01-19	47	3	0.29	90	dr	7.59	8.5115	10.7154	8.5115	9.5501	8.5115	9.5501	6.0257	7.5859	6.7609	7.5859
Sub1	2015-01-19	47	3	0.29	90	dr	7.16	6.7609	8.5115	6.7609	7.5859	6.7609	7.5859	6.7609	7.5859	6.7609	7.5859
Sub1	2015-01-19	47	3	0.29	90	dr	10.72	16.9827	13.4898	16.9827	10.7154	12.0228	9.5501	13.4898	10.7154	13.4898	6.7609
Sub1	2015-01-19	47	3	0.29	90	dr	8.51	5.3704	8.5115	5.3704	9.5501	6.7609	7.5859	6.7609	10.7154	9.5501	10.7154
Sub1	2015-01-19	47	3	0.29	90	dr	6.03	5.3704	8.5115	6.7609	7.5859	6.7609	7.5859	5.3704	6.0257	4.7864	6.0257
Sub1	2015-01-19	47	3	0.29	90	dr	9.19	10.7154	13.4898	8.5115	9.5501	8.5115	10.7154	9.5501	10.7154	7.5859	8.5115
Sub1	2015-01-20	47	3	0.29	90	dr	9.02	6.7609	16.9827	12.0228	13.4898	8.5115	9.5501	8.5115	12.0228	7.5859	8.5115
Sub1	2015-01-20	47	3	0.29	90	dr	8.51	10.7154	13.4898	8.5115	9.5501	6.7609	9.5501	8.5115	9.5501	7.5859	9.5501
Sub1	2015-01-20	47	3	0.29	90	dr	6.89	10.7154	13.4898	9.5501	10.7154	8.5115	9.5501	6.0257	6.7609	5.3704	6.0257
Sub1	2015-01-20	47	3	0.29	90	dr	4.11	4.2659	5.3704	4.2659	4.7864	4.2659	4.7864	4.2659	6.7609	2.6916	3.02
Sub1	2015-01-20	47	3	0.29	90	dr	6.89	8.5115	13.4898	6.0257	7.5859	6.0257	7.5859	6.7609	7.5859	6.0257	7.5859
Sub1	2015-01-20	47	3	0.29	90	dr	6.63	10.7154	13.4898	6.7609	7.5859	6.7609	7.5859	6.7609	7.5859	5.3704	6.0257
Sub1	2015-01-20	47	3	0.29	90	dr	8.04	8.5115	16.9827	10.7154	13.4898	12.0228	13.4898	6.0257	6.7609	6.0257	6.7609
Sub1	2015-01-20	47	3	0.29	90	dr	8.04	10.7154	13.4898	7.5859	9.5501	8.5115	9.5501	7.5859	8.5115	6.7609	7.5859
Sub1	2015-01-20	47	3	0.29	90	dr	3.73	3.3885	4.2659	3.02	4.2659	3.3885	3.802	3.3885	3.802	3.3885	4.7864
Sub1	2015-01-20	47	3	0.29	90	dr	4.61	5.3704	6.7609	5.3704	6.7609	3.802	6.0257	4.2659	4.7864	4.2659	4.7864
Sub1	2015-01-20	47	3	0.29	90	dr	6.03	8.5115	10.7154	6.7609	7.5859	5.3704	6.0257	5.3704	6.7609	6.0257	6.7609
Sub1	2015-01-20	47	3	0.29	90	dr	6.26	16.9827	6.7609	13.4898	5.3704	7.5859	4.2659	6.7609	6.0257	7.5859	6.0257
Sub1	2015-01-20	47	3	0.29	90	dr	5.58	8.5115	10.7154	5.3704	6.7609	5.3704	6.0257	5.3704	6.7609	4.7864	5.3704
Sub1	2015-01-20	47	3	0.29	90	dr	7.16	10.7154	13.4898	6.7609	7.5859	6.7609	7.5859	6.7609	7.5859	5.3704	9.5501
Sub1	2015-01-20	47	3	0.29	90	dr	4.35	5.3704	6.7609	5.3704	6.0257	4.2659	4.7864	4.2659	5.3704	3.3885	4.2659
Sub1	2015-01-20	47	3	0.29	90	dr	5.07	8.5115	10.7154	6.7609	7.5859	6.7609	7.5859	3.3885	4.7864	4.2659	4.7864
Sub1	2015-01-21	47	3	0.29	90	dr	7.44	16.9827	8.5115	10.7154	7.5859	9.5501	7.5859	9.5501	6.0257	6.7609	6.0257
Sub1	2015-01-21	47	3	0.29	90	dr	8.19	8.5115	10.7154	8.5115	10.7154	7.5859	8.5115	7.5859	9.5501	7.5859	8.5115
Sub1	2015-01-21	47	3	0.29	90	dr	4.61	6.7609	8.5115	4.7864	5.3704	4.2659	4.7864	4.2659	5.3704	4.2659	4.7864
Sub1	2015-01-21	47	3	0.29	90	dr	5.58	5.3704	6.7609	5.3704	6.0257	4.7864	6.0257	5.3704	6.0257	5.3704	6.0257
Sub1	2015-01-21	47	3	0.29	90	dr	3.59	8.5115	10.7154	4.2659	4.7864	3.3885	3.802	3.3885	4.7864	2.6916	3.802
Sub1	2015-01-21	47	3	0.29	90	dr	4.52	3.3885	4.2659	3.3885	4.7864	4.2659	4.7864	4.2659	4.7864	4.2659	4.7864
Sub1	2015-01-21	47	3	0.29	90	dr	3.52	3.3885	8.5115	4.2659	5.3704	3.3885	4.2659	3.02	3.3885	3.02	4.2659
Sub1	2015-01-21	47	3	0.29	90	dr	4.27	3.3885	5.3704	3.802	4.7864	3.802	4.2659	3.802	4.7864	3.802	5.3704
Sub1	2015-01-21	47	3	0.29	90	dr	3.2	3.3885	4.2659	3.02	3.3885	3.02	3.3885	3.02	3.3885	3.02	3.3885
Sub1	2015-01-21	47	3	0.29	90	dr	3.59	2.6916	3.3885	2.6916	3.3885	3.02	4.2659	3.3885	3.802	3.3885	3.802
Sub1	2015-01-21	47	3	0.29	90	dr	3.88	6.7609	8.5115	4.2659	5.3704	4.2659	4.7864	3.802	4.2659	3.02	3.3885
Sub1	2015-01-21	47	3	0.29	90	dr	4.18	3.3885	4.2659	3.3885	3.802	3.3885	6.0257	4.2659	4.7864	3.3885	3.802
Sub1	2015-01-21	47	3	0.29	90	dr	5.07	4.2659	6.7609	4.7864	6.7609	5.3704	6.0257	5.3704	6.0257	3.802	4.2659
Sub1	2015-01-21	47	3	0.29	90	dr	3.2	3.3885	5.3704	3.02	3.3885	3.02	3.3885	3.02	3.802	2.6916	3.3885
Sub1	2015-01-21	47	3	0.29	90	dr	4.88	8.5115	10.7154	8.5115	9.5501	4.2659	6.0257	4.7864	5.3704	4.2659	4.7864
Sub1	2015-01-21	47	3	0.29	90	dr	4.18	8.5115	10.7154	6.0257	6.7609	4.2659	4.7864	3.802	4.2659	3.3885	4.7864
Sub1	2015-01-22	47	3	0.29	90	dr	7.3	8.5115	10.7154	6.7609	9.5501	7.5859	8.5115	6.0257	7.5859	6.7609	7.5859
Sub1	2015-01-22	47	3	0.29	90	dr	8.04	6.7609	8.5115	6.7609	8.5115	7.5859	8.5115	7.5859	8.5115	7.5859	8.5115
Sub1	2015-01-22	47	3	0.29	90	dr	6.14	4.2659	6.7609	5.3704	6.7609	6.0257	6.7609	5.3704	7.5859	5.3704	6.0257
Sub1	2015-01-22	47	3	0.29	90	dr	6.38	8.5115	10.7154	8.5115	9.5501	7.5859	8.5115	5.3704	6.0257	5.3704	6.0257
Sub1	2015-01-22	47	3	0.29	90	dr	7.59	6.7609	8.5115	6.7609	7.5859	6.7609	8.5115	6.7609	7.5859	6.7609	9.5501
Sub1	2015-01-22	47	3	0.29	90	dr	5.17	4.2659	8.5115	6.0257	6.7609	5.3704	6.7609	4.2659	4.7864	4.2659	6.0257
Sub1	2015-01-22	47	3	0.29	90	dr	5.07	4.2659	5.3704	4.2659	6.0257	4.7864	5.3704	4.7864	5.3704	4.7864	5.3704
Sub1	2015-01-22	47	3	0.29	90	dr	4.88	5.3704	8.5115	6.7609	7.5859	5.3704	6.0257	5.3704	6.0257	3.3885	3.802
Sub1	2015-01-22	47	3	0.29	90	dr	9.02	10.7154	13.4898	9.5501	10.7154	9.5501	10.7154	8.5115	9.5501	7.5859	8.5115
Sub1	2015-01-22	47	3	0.29	90	dr	7.73	8.5115	10.7154	7.5859	8.5115	7.5859	9.5501	7.5859	8.5115	4.7864	9.5501
Sub1	2015-01-22	47	3	0.29	90	dr	6.63	16.9827	5.3704	6.7609	6.0257	6.7609	6.0257	6.7609	6.0257	7.5859	6.7609
Sub1	2015-01-22	47	3	0.29	90	dr	7.16	8.5115	10.7154	7.5859	8.5115	6.7609	7.5859	6.0257	8.5115	6.7609	7.5859
Sub1	2015-01-22	47	3	0.29	90	dr	8.35	10.7154	16.9827	13.4898	15.1358	8.5115	9.5501	7.5859	8.5115	7.5859	8.5115
Sub1	2015-01-22	47	3	0.29	90	dr	4.61	5.3704	8.5115	4.7864	7.5859	6.0257	6.7609	3.3885	4.7864	3.3885	4.2659
Sub1	2015-01-22	47	3	0.29	90	dr	8.35	16.9827	8.5115	13.4898	7.5859	9.5501	8.5115	9.5501	7.5859	8.5115	6.7609
Sub1	2015-01-22	47	3	0.29	90	dr	4.88	4.2659	6.7609	4.7864	6.0257	4.7864	5.3704	4.7864	5.3704	4.2659	4.7864
Sub1	2015-01-23	47	3	0.29	90	dr	7.16	8.5115	10.7154	6.0257	9.5501	7.5859	8.5115	6.7609	7.5859	6.0257	6.7609
Sub1	2015-01-23	47	3	0.29	90	dr	7.03	8.5115	13.4898	10.7154	12.0228	6.7609	7.5859	6.0257	7.5859	6.7609	7.5859
Sub1	2015-01-23	47	3	0.29	90	dr	10.12	8.5115	13.4898	8.5115	10.7154	9.5501	10.7154	9.5501	10.7154	9.5501	10.7154
Sub1	2015-01-23	47	3	0.29	90	dr	5.58	8.5115	10.7154	6.7609	7.5859	5.3704	6.0257	5.3704	6.7609	4.7864	5.3704
Sub1	2015-01-23	47	3	0.29	90	dr	6.03	5.3704	6.7609	3.3885	6.0257	4.7864	6.0257	5.3704	6.7609	6.0257	7.5859
Sub1	2015-01-23	47	3	0.29	90	ul	10.12	10.7154	13.4898	10.7154	12.0228	9.5501	10.7154	9.5501	10.7154	9.5501	10.7154
Sub1	2015-01-23	47	3	0.29	90	ul	9.74	10.7154	13.4898	8.5115	10.7154	9.5501	12.0228	8.5115	10.7154	8.5115	9.5501
Sub1	2015-01-23	47	3	0.29	90	ul	10.51	10.7154	16.9827	9.5501	10.7154	9.5501	10.7154	9.5501	13.4898	9.5501	10.7154
Sub1	2015-01-23	47	3	0.29	90	ul	5.07	5.3704	6.7609	5.3704	6.0257	4.7864	5.3704	4.7864	5.3704	4.7864	5.3704
Sub1	2015-01-23	47	3	0.29	90	ul	9.55	6.7609	13.4898	9.5501	10.7154	9.5501	10.7154	8.5115	10.7154	8.5115	9.5501
Sub2	2015-01-17	47	3	0.29	90	ul	7.44	6.0257	9.5501	7.5859	8.5115	6.7609	7.5859	6.7609	7.5859	6.7609	9.5501
Sub2	2015-01-17	47	3	0.29	90	ul	7.16	7.5859	12.0228	4.7864	6.7609	6.0257	8.5115	6.7609	7.5859	6.7609	7.5859
Sub2	2015-01-17	47	3	0.29	90	ul	8.68	15.1358	12.0228	15.1358	13.4898	15.1358	12.0228	13.4898	6.0257	6.7609	4.2659
Sub2	2015-01-17	47	3	0.29	90	ul	3.73	4.7864	9.5501	4.7864	6.0257	3.802	4.2659	3.802	4.2659	3.02	3.3885
Sub2	2015-01-17	47	3	0.29	90	ul	3.73	3.02	4.7864	3.802	4.2659	3.3885	3.802	3.3885	4.2659	3.3885	4.2659
Sub2	2015-01-17	47	3	0.29	90	dr	7.88	12.0228	6.0257	8.5115	6.7609	7.5859	6.7609	8.5115	7.5859	9.5501	7.5859
Sub2	2015-01-17	47	3	0.29	90	dr	7.59	7.5859	12.0228	8.5115	9.5501	7.5859	9.5501	7.5859	8.5115	6.0257	6.7609
Sub2	2015-01-17	47	3	0.29	90	dr	6.03	4.7864	6.0257	4.2659	6.0257	5.3704	6.0257	5.3704	6.7609	6.0257	6.7609
Sub2	2015-01-17	47	3	0.29	90	dr	6.03	6.0257	7.5859	6.0257	6.7609	5.3704	6.0257	5.3704	6.7609	5.3704	7.5859
Sub2	2015-01-17	47	3	0.29	90	dr	5.8	6.0257	7.5859	6.0257	6.7609	6.0257	6.7609	5.3704	6.0257	4.7864	6.0257
Sub2	2015-01-18	47	3	0.29	90	ul	5.27	12.0228	6.0257	7.5859	4.7864	5.3704	4.7864	5.3704	4.7864	6.0257	5.3704
Sub2	2015-01-18	47	3	0.29	90	ul	8.68	6.0257	12.0228	8.5115	12.0228	8.5115	9.5501	8.5115	9.5501	6.7609	9.5501
Sub2	2015-01-18	47	3	0.29	90	ul	5.91	6.0257	9.5501	6.0257	8.5115	6.0257	6.7609	6.0257	6.7609	4.7864	5.3704
Sub2	2015-01-18	47	3	0.29	90	ul	6.63	4.7864	6.0257	3.802	6.7609	5.3704	7.5859	6.7609	7.5859	5.3704	7.5859
Sub2	2015-01-18	47	3	0.29	90	ul	3.59	9.5501	6.0257	7.5859	4.2659	4.7864	4.2659	4.7864	2.6916	3.02	2.6916
Sub2	2015-01-18	47	3	0.29	90	ul	5.37	3.802	7.5859	5.3704	6.0257	4.7864	5.3704	4.7864	6.0257	5.3704	6.0257
Sub2	2015-01-18	47	3	0.29	90	ul	2.49	6.0257	7.5859	2.6916	3.3885	2.6916	3.02	2.138	2.6916	2.138	2.3989
Sub2	2015-01-18	47	3	0.29	90	ul	3.8	4.7864	6.0257	3.802	4.2659	3.802	4.7864	2.6916	3.802	3.3885	4.7864
Sub2	2015-01-18	47	3	0.29	90	ul	4.27	3.802	7.5859	4.7864	5.3704	4.7864	5.3704	3.3885	4.7864	3.3885	4.2659
Sub2	2015-01-18	47	3	0.29	90	ul	3.02	3.02	4.7864	2.6916	3.3885	2.6916	4.7864	2.3989	3.02	2.3989	3.3885
Sub2	2015-01-18	47	3	0.29	90	ul	3.88	3.802	4.7864	3.02	3.3885	2.6916	4.2659	3.802	4.2659	3.802	4.7864
Sub2	2015-01-18	47	3	0.29	90	ul	3.14	4.7864	6.0257	4.2659	4.7864	2.138	3.3885	3.02	3.802	3.02	3.802
Sub2	2015-01-18	47	3	0.29	90	ul	3.08	3.02	3.802	3.02	3.3885	2.3989	2.6916	2.3989	3.802	3.3885	4.2659
Sub2	2015-01-18	47	3	0.29	90	ul	4.97	6.0257	9.5501	7.5859	8.5115	5.3704	6.0257	4.7864	5.3704	3.3885	5.3704
Sub2	2015-01-18	47	3	0.29	90	ul	2.22	3.802	4.7864	3.802	4.7864	3.02	3.3885	1.6983	1.9055	1.6983	2.138
Sub2	2015-01-18	47	3	0.29	90	ul	4.27	4.7864	6.0257	4.2659	4.7864	4.2659	5.3704	3.802	4.2659	3.802	4.2659
Sub2	2015-01-19	47	3	0.29	90	ul	4.35	6.0257	7.5859	4.7864	5.3704	4.2659	4.7864	4.2659	4.7864	3.802	4.2659
Sub2	2015-01-19	47	3	0.29	90	ul	3.66	9.5501	3.02	5.3704	4.7864	6.0257	3.802	4.2659	2.3989	3.3885	3.02
Sub2	2015-01-19	47	3	0.29	90	ul	4.52	4.7864	6.0257	4.7864	6.0257	4.2659	4.7864	4.2659	6.0257	3.802	4.2659
Sub2	2015-01-19	47	3	0.29	90	ul	4.97	3.802	4.7864	3.802	7.5859	6.0257	6.7609	5.3704	6.0257	3.02	3.802
Sub2	2015-01-19	47	3	0.29	90	ul	1.3	0.955	1.2023	0.955	1.2023	1.0715	1.2023	1.0715	1.5136	1.0715	2.138
Sub2	2015-01-19	47	3	0.29	90	ul	2.8	2.3989	4.7864	1.9055	2.6916	1.9055	3.3885	3.02	3.802	2.3989	2.6916
Sub2	2015-01-19	47	3	0.29	90	ul	3.73	9.5501	6.0257	7.5859	4.7864	5.3704	3.02	3.802	3.3885	3.802	3.3885
Sub2	2015-01-19	47	3	0.29	90	ul	3.59	6.0257	7.5859	5.3704	6.0257	4.2659	4.7864	3.3885	3.802	2.3989	3.3885
Sub2	2015-01-19	47	3	0.29	90	ul	3.59	3.02	4.7864	3.02	3.802	3.3885	3.802	3.3885	3.802	3.3885	3.802
Sub2	2015-01-19	47	3	0.29	90	ul	2.91	3.02	3.802	2.6916	3.02	2.6916	3.3885	2.6916	3.02	2.6916	3.02
Sub2	2015-01-19	47	3	0.29	90	ul	4.27	2.3989	3.802	3.02	3.3885	2.3989	3.802	3.3885	6.0257	5.3704	6.0257
Sub2	2015-01-19	47	3	0.29	90	ul	2.64	3.02	3.802	2.138	3.02	2.6916	3.02	2.3989	3.02	2.138	2.6916
Sub2	2015-01-19	47	3	0.29	90	ul	2.69	3.802	4.7864	3.02	3.3885	3.02	3.802	3.02	3.3885	1.6983	1.9055
Sub2	2015-01-19	47	3	0.29	90	ul	2.02	3.02	4.7864	2.138	2.6916	2.138	2.3989	1.9055	2.138	1.6983	1.9055
Sub2	2015-01-19	47	3	0.29	90	ul	2.85	4.7864	6.0257	3.02	3.3885	2.6916	3.02	2.6916	3.02	2.6916	3.02
Sub2	2015-01-19	47	3	0.29	90	ul	3.2	1.9055	3.802	2.6916	3.02	2.6916	3.802	3.3885	3.802	2.6916	3.02
Sub2	2015-01-20	47	3	0.29	90	ul	3.88	4.7864	7.5859	2.6916	4.2659	2.6916	4.2659	3.802	4.7864	3.802	4.2659
Sub2	2015-01-20	47	3	0.29	90	ul	3.66	9.5501	4.7864	6.0257	3.3885	3.802	3.3885	3.802	3.3885	4.2659	3.3885
Sub2	2015-01-20	47	3	0.29	90	ul	3.2	3.802	4.7864	3.802	5.3704	3.802	4.2659	2.6916	3.02	2.6916	3.02
Sub2	2015-01-20	47	3	0.29	90	ul	3.95	3.802	4.7864	3.802	5.3704	3.3885	4.2659	3.802	4.2659	3.802	4.2659
Sub2	2015-01-20	47	3	0.29	90	ul	2.96	4.7864	6.0257	2.6916	3.3885	3.02	3.3885	2.6916	3.02	2.6916	3.02
Sub2	2015-01-20	47	3	0.29	90	ul	2.85	4.7864	6.0257	4.2659	4.7864	2.6916	3.02	2.6916	3.02	2.6916	3.02
Sub2	2015-01-20	47	3	0.29	90	ul	1.94	3.02	4.7864	3.802	5.3704	2.138	2.3989	1.6983	1.9055	1.6983	1.9055
Sub2	2015-01-20	47	3	0.29	90	ul	3.45	4.7864	6.0257	3.3885	3.802	3.3885	5.3704	2.6916	3.3885	2.6916	3.802
Sub2	2015-01-20	47	3	0.29	90	ul	4.11	3.802	6.0257	4.2659	4.7864	3.802	4.2659	3.802	4.2659	3.802	4.7864
Sub2	2015-01-20	47	3	0.29	90	ul	3.08	2.3989	3.802	2.6916	3.3885	3.02	3.3885	3.02	3.3885	2.6916	3.02
Sub2	2015-01-20	47	3	0.29	90	ul	3.45	3.802	6.0257	4.7864	5.3704	4.2659	5.3704	3.02	3.3885	2.3989	3.02
Sub2	2015-01-20	47	3	0.29	90	ul	2.02	2.3989	3.02	1.9055	3.02	1.9055	2.138	1.9055	2.138	1.9055	2.138
Sub2	2015-01-20	47	3	0.29	90	ul	3.95	4.7864	7.5859	5.3704	6.0257	4.2659	4.7864	3.3885	3.802	3.3885	4.2659
Sub2	2015-01-20	47	3	0.29	90	ul	2.14	6.0257	9.5501	7.5859	9.5501	2.138	2.3989	2.138	2.3989	1.349	2.6916
Sub2	2015-01-20	47	3	0.29	90	ul	2.18	3.802	4.7864	3.02	3.3885	1.9055	2.3989	2.138	3.02	1.6983	2.138
Sub2	2015-01-20	47	3	0.29	90	ul	3.66	3.802	4.7864	3.802	4.7864	3.02	3.802	3.02	4.2659	3.802	4.2659
Sub2	2015-01-21	47	3	0.29	90	ul	4.03	3.802	4.7864	3.802	4.2659	3.802	4.2659	3.802	4.2659	3.802	4.2659
Sub2	2015-01-21	47	3	0.29	90	ul	2.14	2.3989	3.02	1.6983	1.9055	1.6983	2.6916	2.138	2.3989	1.9055	2.138
Sub2	2015-01-21	47	3	0.29	90	ul	3.45	6.0257	7.5859	3.02	4.2659	3.02	3.802	3.02	3.802	3.3885	3.802
Sub2	2015-01-21	47	3	0.29	90	ul	3.59	4.7864	6.0257	4.2659	6.7609	3.3885	3.802	3.3885	3.802	3.3885	3.802
Sub2	2015-01-21	47	3	0.29	90	ul	3.88	4.7864	6.0257	4.2659	4.7864	4.2659	4.7864	3.3885	3.802	3.3885	3.802
Sub2	2015-01-21	47	3	0.29	90	ul	3.59	4.7864	6.0257	3.02	3.3885	2.3989	3.02	2.6916	4.7864	4.2659	5.3704
Sub2	2015-01-21	47	3	0.29	90	ul	4.11	3.02	3.802	3.02	4.2659	3.802	4.7864	3.3885	4.7864	3.802	4.2659
Sub2	2015-01-21	47	3	0.29	90	ul	2.1	3.02	3.802	2.3989	2.6916	2.138	2.3989	1.9055	3.02	1.5136	1.9055
Sub2	2015-01-21	47	3	0.29	90	ul	4.18	6.0257	7.5859	6.0257	6.7609	4.2659	4.7864	4.2659	4.7864	3.3885	3.802
Sub2	2015-01-21	47	3	0.29	90	ul	3.59	3.802	4.7864	3.802	4.2659	3.802	4.2659	3.802	5.3704	2.138	3.02
Sub2	2015-01-21	47	3	0.29	90	ul	3.26	3.802	4.7864	3.802	4.2659	3.802	4.2659	3.02	3.3885	2.3989	3.02
Sub2	2015-01-21	47	3	0.29	90	ul	4.35	3.802	6.0257	3.802	4.7864	3.3885	4.7864	4.2659	6.0257	3.802	4.2659
Sub2	2015-01-21	47	3	0.29	90	ul	2.54	3.802	4.7864	3.802	4.2659	2.6916	3.3885	2.138	2.3989	2.138	2.6916
Sub2	2015-01-21	47	3	0.29	90	ul	3.14	3.802	4.7864	3.802	4.2659	3.3885	4.2659	2.3989	3.02	2.6916	3.3885
Sub2	2015-01-21	47	3	0.29	90	ul	2.96	6.0257	7.5859	2.6916	3.02	2.6916	3.02	2.6916	4.7864	2.3989	2.6916
Sub2	2015-01-21	47	3	0.29	90	ul	1.63	1.9055	2.3989	1.5136	1.6983	1.0715	1.5136	1.349	2.138	1.9055	2.138
Sub2	2015-01-22	47	3	0.29	90	ul	1.94	3.802	4.7864	1.9055	2.138	1.9055	2.138	1.9055	2.138	1.6983	1.9055
Sub2	2015-01-22	47	3	0.29	90	ul	2.85	3.02	3.802	2.6916	3.02	2.6916	3.02	2.6916	3.02	2.6916	3.02
Sub2	2015-01-22	47	3	0.29	90	ul	2.74	4.7864	6.0257	2.6916	3.802	3.02	3.3885	2.6916	3.02	2.138	2.3989
Sub2	2015-01-22	47	3	0.29	90	ul	2.14	1.5136	1.9055	1.5136	2.3989	2.138	2.6916	2.3989	2.6916	1.5136	1.6983
Sub2	2015-01-22	47	3	0.29	90	ul	2.54	9.5501	3.02	3.802	1.9055	2.6916	2.3989	3.02	2.3989	3.02	1.9055
Sub2	2015-01-22	47	3	0.29	90	ul	1.67	1.5136	1.9055	1.5136	1.9055	1.5136	1.6983	1.5136	1.6983	1.5136	2.138
Sub2	2015-01-22	47	3	0.29	90	ul	2.35	1.5136	3.802	1.5136	2.3989	1.9055	2.6916	2.3989	2.6916	2.138	2.3989
Sub2	2015-01-22	47	3	0.29	90	ul	2.91	4.7864	6.0257	3.3885	3.802	3.3885	3.802	2.138	2.6916	2.3989	3.3885
Sub2	2015-01-22	47	3	0.29	90	ul	2.91	2.3989	3.02	2.3989	4.2659	2.6916	3.02	2.6916	3.02	2.6916	3.3885
Sub2	2015-01-22	47	3	0.29	90	ul	2.45	3.02	3.802	3.02	3.802	2.138	2.3989	2.138	2.6916	2.138	3.3885
Sub2	2015-01-22	47	3	0.29	90	ul	4.35	3.802	4.7864	3.802	4.7864	4.2659	5.3704	4.2659	4.7864	3.3885	4.2659
Sub2	2015-01-22	47	3	0.29	90	ul	4.35	4.7864	6.0257	3.3885	3.802	3.3885	3.802	3.3885	6.0257	4.7864	5.3704
Sub2	2015-01-22	47	3	0.29	90	ul	1.57	3.802	4.7864	3.3885	3.802	2.138	2.3989	1.2023	1.349	1.0715	1.6983
Sub2	2015-01-22	47	3	0.29	90	ul	3.45	2.3989	3.802	3.02	3.3885	3.02	4.2659	3.802	4.2659	2.6916	3.02
Sub2	2015-01-22	47	3	0.29	90	ul	2.96	6.0257	7.5859	3.802	4.7864	3.02	3.3885	3.02	3.3885	2.3989	2.6916
Sub2	2015-01-22	47	3	0.29	90	ul	1.67	3.802	4.7864	3.02	3.3885	1.6983	1.9055	1.5136	1.6983	1.2023	2.138
Sub2	2015-01-23	47	3	0.29	90	ul	3.73	6.0257	9.5501	6.0257	6.7609	3.802	4.2659	3.3885	3.802	3.3885	3.802
Sub2	2015-01-23	47	3	0.29	90	ul	2.49	3.802	4.7864	2.3989	2.6916	2.3989	2.6916	2.3989	2.6916	2.138	2.6916
Sub2	2015-01-23	47	3	0.29	90	ul	4.35	7.5859	9.5501	4.2659	4.7864	3.3885	4.2659	3.3885	5.3704	4.7864	5.3704
Sub2	2015-01-23	47	3	0.29	90	ul	4.52	6.0257	7.5859	6.0257	8.5115	7.5859	8.5115	3.02	3.802	3.02	3.802
Sub2	2015-01-23	47	3	0.29	90	dr	3.2	3.02	3.802	3.02	3.3885	3.02	3.3885	3.02	3.3885	3.02	3.3885
Sub2	2015-01-23	47	3	0.29	90	dr	2.02	7.5859	9.5501	2.6916	3.3885	2.138	2.3989	1.9055	2.138	1.6983	1.9055
Sub2	2015-01-23	47	3	0.29	90	dr	3.2	4.7864	6.0257	3.802	4.2659	3.02	3.3885	3.02	3.3885	3.02	3.3885
Sub2	2015-01-23	47	3	0.29	90	dr	2.91	4.7864	6.0257	2.6916	3.802	3.3885	3.802	1.9055	3.02	2.6916	3.02
Sub2	2015-01-23	47	3	0.29	90	dr	1.87	1.9055	2.3989	1.9055	2.6916	2.138	2.3989	1.5136	1.6983	1.5136	2.138
Sub3	2015-01-18	47	3	0.29	90	dl	4.27	3.3885	5.3704	3.802	4.7864	4.2659	4.7864	3.802	4.2659	3.802	4.7864
Sub3	2015-01-18	47	3	0.29	90	dl	5.17	4.2659	5.3704	3.802	5.3704	4.2659	6.0257	5.3704	6.0257	4.2659	5.3704
Sub3	2015-01-18	47	3	0.29	90	dl	4.27	4.2659	5.3704	4.2659	4.7864	4.2659	4.7864	3.802	4.2659	3.3885	5.3704
Sub3	2015-01-18	47	3	0.29	90	dl	4.18	3.3885	4.2659	3.3885	3.802	3.3885	4.7864	4.2659	4.7864	3.802	4.2659
Sub3	2015-01-18	47	3	0.29	90	dl	6.38	8.5115	5.3704	7.5859	6.7609	8.5115	7.5859	8.5115	4.7864	6.0257	4.2659
Sub3	2015-01-18	47	3	0.29	90	ur	7.59	6.7609	5.3704	6.7609	6.0257	7.5859	5.3704	8.5115	7.5859	9.5501	7.5859
Sub3	2015-01-18	47	3	0.29	90	ur	3.95	2.138	2.6916	1.9055	2.138	1.9055	4.2659	3.802	4.7864	4.2659	6.0257
Sub3	2015-01-18	47	3	0.29	90	ur	7.16	6.7609	5.3704	6.7609	5.3704	6.7609	5.3704	8.5115	7.5859	8.5115	6.7609
Sub3	2015-01-18	47	3	0.29	90	ur	4.18	4.2659	5.3704	4.2659	5.3704	3.802	4.7864	3.802	4.2659	3.802	4.7864
Sub3	2015-01-18	47	3	0.29	90	ur	7.16	6.7609	5.3704	6.7609	6.0257	6.7609	5.3704	8.5115	7.5859	8.5115	6.7609
Sub3	2015-01-19	47	3	0.29	90	dl	6.51	6.0257	9.5501	6.0257	7.5859	6.0257	6.7609	6.0257	7.5859	6.0257	6.7609
Sub3	2015-01-19	47	3	0.29	90	dl	4.35	3.802	7.5859	5.3704	6.0257	3.802	5.3704	4.2659	4.7864	3.802	4.2659
Sub3	2015-01-19	47	3	0.29	90	dl	5.91	6.0257	7.5859	5.3704	6.0257	5.3704	6.0257	3.802	6.7609	6.0257	8.5115
Sub3	2015-01-19	47	3	0.29	90	dl	3.73	3.02	4.7864	3.802	4.2659	3.3885	4.2659	3.3885	3.802	3.3885	4.2659
Sub3	2015-01-19	47	3	0.29	90	dl	4.43	3.802	4.7864	3.802	6.0257	4.2659	4.7864	3.802	4.7864	4.2659	4.7864
Sub3	2015-01-19	47	3	0.29	90	dl	4.03	3.802	6.0257	4.7864	6.0257	3.802	4.2659	3.802	4.2659	3.802	4.2659
Sub3	2015-01-19	47	3	0.29	90	dl	5.47	4.7864	6.0257	4.7864	6.0257	5.3704	6.7609	4.7864	5.3704	4.2659	6.7609
Sub3	2015-01-19	47	3	0.29	90	dl	7.3	9.5501	6.0257	7.5859	6.7609	7.5859	6.7609	7.5859	6.7609	8.5115	6.7609
Sub3	2015-01-19	47	3	0.29	90	dl	4.27	6.0257	7.5859	3.802	4.2659	3.802	4.2659	3.802	4.7864	3.802	5.3704
Sub3	2015-01-19	47	3	0.29	90	dl	4.35	9.5501	4.7864	6.0257	4.2659	4.7864	4.2659	4.7864	3.3885	4.7864	4.2659
Sub3	2015-01-19	47	3	0.29	90	dl	6.51	6.0257	7.5859	4.7864	6.7609	5.3704	6.7609	6.0257	6.7609	6.0257	8.5115
Sub3	2015-01-19	47	3	0.29	90	dl	5.07	4.7864	6.0257	4.2659	5.3704	4.7864	5.3704	4.7864	6.0257	4.2659	5.3704
Sub3	2015-01-19	47	3	0.29	90	dl	5.07	3.802	4.7864	3.802	4.2659	3.802	4.7864	4.2659	6.7609	5.3704	6.0257
Sub3	2015-01-19	47	3	0.29	90	dl	2.06	1.5136	1.9055	1.5136	1.9055	1.6983	1.9055	1.6983	1.9055	1.6983	4.2659
Sub3	2015-01-19	47	3	0.29	90	dl	3.95	3.802	6.0257	4.2659	4.7864	3.802	4.2659	3.3885	4.2659	3.802	4.2659
Sub3	2015-01-19	47	3	0.29	90	dl	4.97	6.0257	7.5859	4.2659	4.7864	4.2659	5.3704	4.7864	5.3704	4.7864	5.3704
Sub3	2015-01-20	47	3	0.29	90	dl	5.17	4.7864	7.5859	4.7864	5.3704	4.7864	5.3704	4.7864	6.0257	4.7864	5.3704
Sub3	2015-01-20	47	3	0.29	90	dl	3.8	3.02	3.802	2.6916	3.802	2.6916	3.802	3.02	4.7864	3.802	5.3704
Sub3	2015-01-20	47	3	0.29	90	dl	4.97	3.802	4.7864	3.802	4.7864	3.802	5.3704	4.7864	5.3704	4.7864	6.0257
Sub3	2015-01-20	47	3	0.29	90	dl	2.49	2.3989	3.02	2.3989	3.02	2.6916	3.02	2.138	2.3989	2.138	2.6916
Sub3	2015-01-20	47	3	0.29	90	dl	3.52	3.02	3.802	2.3989	2.6916	2.138	3.802	3.02	4.2659	3.802	4.7864
Sub3	2015-01-20	47	3	0.29	90	dl	4.61	3.02	6.0257	4.7864	6.7609	5.3704	6.0257	4.2659	5.3704	3.3885	3.802
Sub3	2015-01-20	47	3	0.29	90	dl	3.88	4.7864	9.5501	6.0257	6.7609	3.802	4.7864	3.3885	3.802	3.3885	4.2659
Sub3	2015-01-20	47	3	0.29	90	dl	3.45	4.7864	6.0257	4.7864	5.3704	3.802	4.2659	3.02	3.3885	3.02	3.3885
Sub3	2015-01-20	47	3	0.29	90	dl	4.11	6.0257	7.5859	3.802	4.2659	3.802	4.2659	3.802	4.2659	3.802	4.7864
Sub3	2015-01-20	47	3	0.29	90	dl	5.69	1.9055	2.3989	1.9055	3.802	3.3885	4.2659	3.802	8.5115	7.5859	9.5501
Sub3	2015-01-20	47	3	0.29	90	dl	2.91	4.7864	6.0257	3.02	3.3885	2.6916	3.02	2.6916	3.02	2.6916	3.3885
Sub3	2015-01-20	47	3	0.29	90	dl	3.26	6.0257	7.5859	4.7864	6.0257	2.3989	3.3885	2.138	4.2659	3.802	4.2659
Sub3	2015-01-20	47	3	0.29	90	dl	4.7	3.802	4.7864	3.3885	3.802	3.3885	4.7864	4.2659	6.0257	4.2659	6.0257
Sub3	2015-01-20	47	3	0.29	90	dl	3.2	3.802	4.7864	2.6916	3.802	3.3885	3.802	3.02	3.3885	2.6916	3.02
Sub3	2015-01-20	47	3	0.29	90	dl	4.61	4.7864	6.0257	4.7864	5.3704	4.7864	5.3704	4.2659	5.3704	3.802	4.2659
Sub3	2015-01-20	47	3	0.29	90	dl	4.43	4.7864	6.0257	4.2659	4.7864	4.2659	4.7864	3.802	4.2659	3.802	6.0257
Sub3	2015-01-21	47	3	0.29	90	dl	5.69	4.7864	7.5859	6.0257	6.7609	4.2659	4.7864	4.2659	7.5859	6.7609	7.5859
Sub3	2015-01-21	47	3	0.29	90	dl	6.03	4.7864	6.0257	4.7864	5.3704	4.7864	6.7609	6.0257	6.7609	5.3704	6.7609
Sub3	2015-01-21	47	3	0.29	90	dl	3.88	4.7864	6.0257	2.6916	3.3885	3.02	3.802	3.3885	4.7864	3.802	4.7864
Sub3	2015-01-21	47	3	0.29	90	dl	3.32	2.3989	3.02	2.138	3.02	2.6916	3.3885	3.02	3.802	3.3885	3.802
Sub3	2015-01-21	47	3	0.29	90	dl	3.26	3.802	4.7864	3.3885	3.802	3.02	3.3885	3.02	3.3885	3.02	3.802
Sub3	2015-01-21	47	3	0.29	90	dl	3.08	3.02	4.7864	3.02	3.3885	2.6916	3.02	2.138	4.2659	3.02	3.802
Sub3	2015-01-21	47	3	0.29	90	dl	3.02	3.802	4.7864	3.3885	3.802	3.3885	4.2659	2.6916	3.3885	2.138	2.6916
Sub3	2015-01-21	47	3	0.29	90	dl	3.8	3.02	4.7864	3.02	3.3885	2.6916	3.802	3.3885	4.2659	3.802	5.3704
Sub3	2015-01-21	47	3	0.29	90	dl	5.07	9.5501	3.802	4.7864	3.802	4.2659	3.802	6.7609	3.802	6.7609	6.0257
Sub3	2015-01-21	47	3	0.29	90	dl	4.18	6.0257	7.5859	4.2659	4.7864	4.2659	4.7864	3.3885	4.2659	3.3885	5.3704
Sub3	2015-01-21	47	3	0.29	90	dl	5.07	4.7864	6.0257	3.802	5.3704	4.7864	5.3704	4.7864	6.0257	4.2659	5.3704
Sub3	2015-01-21	47	3	0.29	90	dl	4.43	4.7864	6.0257	3.3885	5.3704	4.7864	5.3704	4.7864	6.0257	3.02	3.3885
Sub3	2015-01-21	47	3	0.29	90	dl	5.17	4.7864	6.0257	4.7864	5.3704	3.802	4.7864	4.2659	6.0257	5.3704	7.5859
Sub3	2015-01-21	47	3	0.29	90	dl	5.17	4.7864	6.0257	4.2659	4.7864	4.2659	5.3704	4.7864	6.0257	4.7864	6.0257
Sub3	2015-01-21	47	3	0.29	90	dl	3.2	4.7864	6.0257	4.2659	5.3704	3.3885	3.802	3.02	3.3885	2.6916	3.02
Sub3	2015-01-21	47	3	0.29	90	dl	4.27	4.7864	6.0257	4.2659	4.7864	4.2659	4.7864	3.802	4.2659	3.802	4.7864
Sub3	2015-01-22	47	3	0.29	90	dl	2.69	4.7864	6.0257	4.7864	6.0257	2.3989	2.6916	2.3989	3.02	2.6916	3.02
Sub3	2015-01-22	47	3	0.29	90	dl	4.35	1.5136	4.7864	3.802	4.7864	4.2659	4.7864	4.2659	4.7864	3.802	4.2659
Sub3	2015-01-22	47	3	0.29	90	dl	3.39	2.3989	3.802	3.02	3.802	3.3885	4.2659	3.02	3.3885	3.02	3.3885
Sub3	2015-01-22	47	3	0.29	90	dl	2.54	9.5501	3.02	3.802	2.6916	3.02	2.3989	3.02	1.9055	2.6916	2.3989
Sub3	2015-01-22	47	3	0.29	90	dl	3.2	3.802	4.7864	3.802	4.2659	2.6916	3.3885	3.02	3.802	3.02	3.3885
Sub3	2015-01-22	47	3	0.29	90	dl	3.26	4.7864	6.0257	3.802	4.2659	3.02	3.3885	3.02	3.3885	3.02	3.802
Sub3	2015-01-22	47	3	0.29	90	dl	2.8	3.802	4.7864	3.02	3.3885	2.3989	3.02	2.6916	3.02	2.6916	3.02
Sub3	2015-01-22	47	3	0.29	90	dl	3.39	1.9055	2.3989	1.9055	3.02	2.6916	3.02	2.3989	4.2659	3.802	4.7864
Sub3	2015-01-22	47	3	0.29	90	dl	3.59	2.3989	3.802	3.02	3.802	3.3885	3.802	3.3885	3.802	2.6916	4.7864
Sub3	2015-01-22	47	3	0.29	90	dl	2.64	1.9055	2.3989	1.9055	2.3989	2.138	2.6916	2.3989	3.3885	2.138	3.3885
Sub3	2015-01-22	47	3	0.29	90	dl	4.52	2.3989	3.802	3.02	4.2659	3.802	4.7864	4.2659	4.7864	4.2659	5.3704
Sub3	2015-01-22	47	3	0.29	90	dl	3.88	4.7864	6.0257	3.802	4.7864	3.3885	3.802	3.02	6.0257	3.3885	4.2659
Sub3	2015-01-22	47	3	0.29	90	dl	3.02	1.2023	3.02	2.138	2.6916	2.3989	2.6916	2.3989	3.802	3.3885	3.802
Sub3	2015-01-22	47	3	0.29	90	dl	3.39	1.5136	7.5859	3.02	3.3885	2.138	3.3885	3.02	4.2659	3.802	4.2659
Sub3	2015-01-22	47	3	0.29	90	dl	3.14	2.3989	3.02	2.3989	2.6916	2.3989	3.02	2.6916	4.2659	3.02	3.802
Sub3	2015-01-22	47	3	0.29	90	dl	2.64	1.9055	3.02	2.3989	3.02	2.3989	3.02	2.3989	2.6916	2.3989	3.02
Sub3	2015-01-22	47	3	0.29	90	dl	3.88	4.7864	6.0257	3.3885	3.802	3.3885	4.2659	3.802	4.7864	3.3885	3.802
Sub3	2015-01-24	47	3	0.29	90	dl	3.32	4.7864	6.0257	4.7864	6.0257	3.3885	3.802	2.6916	3.802	3.02	3.3885
Sub3	2015-01-24	47	3	0.29	90	dl	5.17	4.7864	6.0257	3.02	5.3704	4.7864	5.3704	4.7864	5.3704	4.2659	6.7609
Sub3	2015-01-24	47	3	0.29	90	dl	4.11	3.02	3.802	2.3989	4.2659	3.802	4.2659	3.802	4.2659	3.802	4.7864
Sub3	2015-01-24	47	3	0.29	90	dl	3.08	2.3989	3.802	3.02	3.3885	3.02	3.3885	2.6916	3.02	2.3989	4.2659
Sub3	2015-01-24	47	3	0.29	90	dl	2.31	1.9055	2.3989	1.9055	2.138	1.6983	2.3989	2.138	2.6916	2.3989	2.6916
Sub3	2015-01-24	47	3	0.29	90	dl	4.43	4.7864	6.0257	4.2659	4.7864	4.2659	4.7864	4.2659	5.3704	3.802	4.2659
Sub3	2015-01-24	47	3	0.29	90	dl	2.85	1.2023	3.02	2.3989	2.6916	2.3989	3.3885	2.6916	3.02	2.6916	3.02
Sub3	2015-01-24	47	3	0.29	90	dl	4.52	3.02	4.7864	3.802	4.7864	3.802	6.0257	5.3704	6.0257	3.02	3.802
Sub3	2015-01-24	47	3	0.29	90	dl	3.02	3.02	4.7864	2.3989	2.6916	2.3989	3.3885	3.02	3.802	2.6916	3.02
Sub3	2015-01-24	47	3	0.29	90	dl	3.14	3.802	4.7864	3.02	3.3885	2.6916	3.02	2.6916	3.802	3.02	3.802
Sub3	2015-01-24	47	3	0.29	90	dl	4.03	3.02	3.802	3.02	3.3885	3.02	3.3885	3.02	5.3704	4.7864	5.3704
Sub3	2015-01-24	47	3	0.29	90	dl	3.39	4.7864	6.0257	4.7864	6.0257	2.6916	3.02	2.6916	4.2659	3.802	4.2659
Sub3	2015-01-24	47	3	0.29	90	dl	3.39	3.02	3.802	3.02	3.3885	3.02	3.3885	2.6916	3.3885	3.02	5.3704
Sub3	2015-01-24	47	3	0.29	90	dl	5.27	4.7864	6.0257	4.2659	6.0257	4.7864	5.3704	4.2659	6.0257	5.3704	6.0257
Sub3	2015-01-24	47	3	0.29	90	dl	4.03	9.5501	3.02	4.2659	3.802	4.2659	3.802	4.2659	3.802	4.7864	3.3885
Sub3	2015-01-24	47	3	0.29	90	dl	3.88	2.3989	3.02	2.3989	3.02	2.3989	3.802	3.02	6.0257	3.802	5.3704
Sub3	2015-01-25	47	3	0.29	90	dl	3.02	6.0257	7.5859	2.6916	3.3885	3.02	3.3885	3.02	3.802	2.3989	2.6916
Sub3	2015-01-25	47	3	0.29	90	dl	3.02	2.3989	3.02	2.3989	2.6916	2.3989	2.6916	2.3989	3.802	3.3885	3.802
Sub3	2015-01-25	47	3	0.29	90	dl	4.79	4.7864	6.0257	4.7864	6.7609	4.7864	5.3704	4.2659	5.3704	3.802	5.3704
Sub3	2015-01-25	47	3	0.29	90	dl	4.52	6.0257	7.5859	4.2659	6.0257	3.802	4.2659	3.802	6.7609	4.2659	4.7864
Sub3	2015-01-25	47	3	0.29	90	dl	2.22	1.5136	1.9055	1.5136	1.9055	1.6983	1.9055	1.6983	2.6916	2.3989	3.3885
Sub3	2015-01-25	47	3	0.29	90	ur	4.7	4.7864	6.0257	4.2659	5.3704	4.7864	5.3704	4.2659	4.7864	4.2659	4.7864
Sub3	2015-01-25	47	3	0.29	90	ur	4.61	3.802	4.7864	3.802	5.3704	4.2659	4.7864	3.802	5.3704	4.2659	5.3704
Sub3	2015-01-25	47	3	0.29	90	ur	3.02	3.802	4.7864	3.02	4.2659	3.02	3.3885	2.138	3.02	2.6916	4.2659
Sub3	2015-01-25	47	3	0.29	90	ur	4.11	3.02	4.7864	3.802	6.7609	4.2659	4.7864	3.802	4.2659	3.3885	4.2659
Sub3	2015-01-25	47	3	0.29	90	ur	3.26	3.02	3.802	2.6916	3.02	2.3989	3.3885	3.02	3.802	3.3885	3.802
Sub4	2015-01-19	47	3	0.29	90	ur	9.02	6.0257	7.5859	6.0257	9.5501	8.5115	9.5501	7.5859	9.5501	8.5115	10.7154
Sub4	2015-01-19	47	3	0.29	90	ur	5.37	3.02	3.802	3.02	3.802	3.3885	7.5859	5.3704	6.0257	4.7864	6.0257
Sub4	2015-01-19	47	3	0.29	90	ur	7.16	9.5501	7.5859	9.5501	7.5859	8.5115	6.0257	7.5859	6.7609	7.5859	6.7609
Sub4	2015-01-19	47	3	0.29	90	ur	8.84	9.5501	7.5859	9.5501	8.5115	9.5501	7.5859	9.5501	8.5115	9.5501	8.5115
Sub4	2015-01-19	47	3	0.29	90	ur	8.84	15.1358	7.5859	9.5501	8.5115	9.5501	8.5115	9.5501	8.5115	10.7154	6.7609
Sub4	2015-01-19	47	3	0.29	90	dl	7.3	3.802	6.0257	4.7864	6.7609	5.3704	8.5115	7.5859	8.5115	6.0257	8.5115
Sub4	2015-01-19	47	3	0.29	90	dl	6.14	6.0257	7.5859	5.3704	6.0257	5.3704	6.0257	5.3704	7.5859	6.0257	6.7609
Sub4	2015-01-19	47	3	0.29	90	dl	5.58	9.5501	6.0257	8.5115	6.7609	7.5859	6.0257	6.7609	4.7864	5.3704	3.802
Sub4	2015-01-19	47	3	0.29	90	dl	4.35	3.02	3.802	3.02	5.3704	4.7864	5.3704	3.3885	3.802	3.02	6.7609
Sub4	2015-01-19	47	3	0.29	90	dl	5.8	6.0257	7.5859	5.3704	6.0257	4.7864	6.7609	6.0257	6.7609	4.7864	6.0257
Sub4	2015-01-20	47	3	0.29	90	ur	9.37	9.5501	7.5859	12.0228	9.5501	10.7154	9.5501	10.7154	8.5115	9.5501	7.5859
Sub4	2015-01-20	47	3	0.29	90	ur	5.47	4.7864	6.0257	4.7864	5.3704	4.2659	5.3704	4.7864	6.0257	5.3704	7.5859
Sub4	2015-01-20	47	3	0.29	90	ur	6.38	6.0257	7.5859	6.0257	7.5859	6.7609	7.5859	5.3704	7.5859	5.3704	6.0257
Sub4	2015-01-20	47	3	0.29	90	ur	4.79	6.0257	7.5859	5.3704	6.7609	4.7864	5.3704	4.7864	5.3704	3.802	4.7864
Sub4	2015-01-20	47	3	0.29	90	ur	7.88	4.7864	7.5859	6.0257	6.7609	6.0257	8.5115	7.5859	8.5115	7.5859	9.5501
Sub4	2015-01-20	47	3	0.29	90	ur	4.27	6.0257	7.5859	4.2659	5.3704	4.7864	5.3704	3.802	4.2659	3.3885	4.2659
Sub4	2015-01-20	47	3	0.29	90	ur	4.97	9.5501	4.7864	6.7609	5.3704	6.0257	4.2659	5.3704	4.2659	5.3704	4.7864
Sub4	2015-01-20	47	3	0.29	90	ur	6.38	4.7864	7.5859	6.0257	6.7609	6.0257	6.7609	6.0257	6.7609	6.0257	6.7609
Sub4	2015-01-20	47	3	0.29	90	ur	6.76	4.7864	6.0257	4.2659	6.7609	6.0257	7.5859	6.7609	7.5859	6.0257	6.7609
Sub4	2015-01-20	47	3	0.29	90	ur	7.73	4.7864	6.0257	4.2659	6.7609	6.0257	6.7609	6.0257	10.7154	8.5115	9.5501
Sub4	2015-01-20	47	3	0.29	90	ur	5.07	6.0257	7.5859	4.7864	5.3704	4.7864	5.3704	4.2659	5.3704	4.2659	6.7609
Sub4	2015-01-20	47	3	0.29	90	ur	3.95	6.0257	7.5859	4.2659	4.7864	3.02	3.3885	3.02	5.3704	4.2659	5.3704
Sub4	2015-01-20	47	3	0.29	90	ur	4.43	2.3989	4.7864	3.802	4.2659	3.802	5.3704	4.7864	5.3704	3.3885	4.2659
Sub4	2015-01-20	47	3	0.29	90	ur	5.07	4.7864	6.0257	4.2659	4.7864	4.2659	5.3704	4.7864	5.3704	4.2659	6.7609
Sub4	2015-01-20	47	3	0.29	90	ur	4.61	6.0257	7.5859	5.3704	6.0257	5.3704	6.0257	3.802	4.7864	3.802	4.2659
Sub4	2015-01-20	47	3	0.29	90	ur	6.76	9.5501	7.5859	12.0228	6.0257	8.5115	4.7864	7.5859	6.7609	7.5859	6.0257
Sub4	2015-01-21	47	3	0.29	90	ur	9.19	6.0257	15.1358	10.7154	12.0228	10.7154	12.0228	7.5859	8.5115	7.5859	9.5501
Sub4	2015-01-21	47	3	0.29	90	ur	7.03	9.5501	7.5859	9.5501	6.7609	7.5859	6.7609	7.5859	6.7609	7.5859	6.0257
Sub4	2015-01-21	47	3	0.29	90	ur	5.47	12.0228	4.7864	6.0257	5.3704	6.0257	4.7864	6.0257	5.3704	6.0257	4.7864
Sub4	2015-01-21	47	3	0.29	90	ur	7.88	12.0228	9.5501	12.0228	10.7154	12.0228	9.5501	10.7154	5.3704	6.7609	5.3704
Sub4	2015-01-21	47	3	0.29	90	ur	9.37	9.5501	6.0257	10.7154	8.5115	10.7154	8.5115	10.7154	8.5115	10.7154	7.5859
Sub4	2015-01-21	47	3	0.29	90	ur	5.8	4.7864	7.5859	6.0257	7.5859	5.3704	6.0257	5.3704	6.0257	5.3704	6.7609
Sub4	2015-01-21	47	3	0.29	90	ur	5.47	6.0257	9.5501	5.3704	6.0257	4.7864	5.3704	4.2659	6.0257	5.3704	7.5859
Sub4	2015-01-21	47	3	0.29	90	ur	3.59	3.802	4.7864	3.802	4.2659	3.802	4.2659	3.02	4.2659	2.6916	3.802
Sub4	2015-01-21	47	3	0.29	90	ur	4.52	6.0257	7.5859	4.7864	5.3704	4.2659	5.3704	3.802	4.7864	4.2659	4.7864
Sub4	2015-01-21	47	3	0.29	90	ur	6.76	6.0257	9.5501	6.0257	6.7609	6.0257	7.5859	6.7609	7.5859	5.3704	7.5859
Sub4	2015-01-21	47	3	0.29	90	ur	4.43	4.7864	9.5501	6.0257	6.7609	3.02	4.7864	4.2659	4.7864	4.2659	6.0257
Sub4	2015-01-21	47	3	0.29	90	ur	5.58	6.0257	9.5501	7.5859	8.5115	6.7609	7.5859	4.2659	5.3704	4.2659	6.0257
Sub4	2015-01-21	47	3	0.29	90	ur	7.88	9.5501	6.0257	7.5859	6.7609	8.5115	7.5859	8.5115	6.7609	8.5115	7.5859
Sub4	2015-01-21	47	3	0.29	90	ur	8.04	6.0257	7.5859	4.7864	7.5859	6.7609	8.5115	7.5859	9.5501	7.5859	8.5115
Sub4	2015-01-21	47	3	0.29	90	ur	4.27	12.0228	7.5859	9.5501	4.7864	5.3704	3.3885	4.7864	3.802	4.7864	3.802
Sub4	2015-01-21	47	3	0.29	90	ur	5.07	4.7864	6.0257	4.2659	7.5859	4.7864	6.7609	4.7864	5.3704	4.2659	4.7864
Sub4	2015-01-22	47	3	0.29	90	ur	6.51	6.0257	9.5501	6.0257	6.7609	6.0257	7.5859	5.3704	7.5859	6.0257	6.7609
Sub4	2015-01-22	47	3	0.29	90	ur	7.03	12.0228	7.5859	12.0228	6.7609	8.5115	7.5859	8.5115	6.0257	6.7609	5.3704
Sub4	2015-01-22	47	3	0.29	90	ur	5.17	6.0257	7.5859	5.3704	6.0257	5.3704	6.0257	4.7864	5.3704	4.2659	5.3704
Sub4	2015-01-22	47	3	0.29	90	ur	6.26	6.0257	12.0228	8.5115	12.0228	8.5115	10.7154	4.7864	5.3704	4.7864	5.3704
Sub4	2015-01-22	47	3	0.29	90	ur	4.79	3.02	6.0257	4.2659	5.3704	4.2659	4.7864	4.2659	5.3704	4.7864	5.3704
Sub4	2015-01-22	47	3	0.29	90	ur	8.04	9.5501	7.5859	9.5501	8.5115	9.5501	8.5115	9.5501	6.7609	7.5859	6.7609
Sub4	2015-01-22	47	3	0.29	90	ur	6.03	6.0257	9.5501	4.2659	4.7864	4.2659	7.5859	5.3704	6.7609	5.3704	7.5859
Sub4	2015-01-22	47	3	0.29	90	ur	4.52	2.3989	4.7864	3.3885	4.2659	3.802	4.7864	3.802	5.3704	4.2659	5.3704
Sub4	2015-01-22	47	3	0.29	90	ur	8.84	3.802	9.5501	6.0257	7.5859	6.7609	8.5115	6.7609	10.7154	9.5501	12.0228
Sub4	2015-01-22	47	3	0.29	90	ur	4.52	3.02	6.0257	4.2659	4.7864	4.2659	4.7864	4.2659	4.7864	4.2659	4.7864
Sub4	2015-01-22	47	3	0.29	90	ur	6.26	4.7864	7.5859	4.2659	6.7609	5.3704	6.0257	5.3704	6.7609	6.0257	8.5115
Sub4	2015-01-22	47	3	0.29	90	ur	5.91	4.7864	7.5859	5.3704	6.7609	6.0257	8.5115	5.3704	6.7609	3.802	6.0257
Sub4	2015-01-23	47	3	0.29	90	ur	9.02	4.7864	7.5859	6.0257	8.5115	7.5859	10.7154	6.7609	10.7154	8.5115	10.7154
Sub4	2015-01-23	47	3	0.29	90	ur	6.38	6.0257	7.5859	5.3704	6.0257	5.3704	6.7609	6.0257	6.7609	6.0257	7.5859
Sub4	2015-01-23	47	3	0.29	90	ur	3.88	3.802	4.7864	3.3885	3.802	3.3885	3.802	3.3885	3.802	3.3885	6.0257
Sub4	2015-01-23	47	3	0.29	90	ur	5.47	4.7864	7.5859	5.3704	6.0257	4.2659	6.0257	5.3704	6.0257	5.3704	6.0257
Sub4	2015-01-23	47	3	0.29	90	ur	6.14	4.7864	9.5501	6.0257	7.5859	6.0257	6.7609	6.0257	6.7609	5.3704	6.0257
Sub4	2015-01-23	47	3	0.29	90	ur	4.43	4.7864	6.0257	3.802	4.2659	3.3885	4.2659	3.802	5.3704	4.7864	5.3704
Sub4	2015-01-23	47	3	0.29	90	ur	4.35	2.3989	6.0257	3.3885	4.2659	3.802	4.7864	4.2659	4.7864	3.802	4.7864
Sub4	2015-01-23	47	3	0.29	90	ur	5.8	3.802	4.7864	3.3885	6.0257	4.7864	6.0257	5.3704	6.0257	5.3704	7.5859
Sub4	2015-01-23	47	3	0.29	90	ur	5.91	1.9055	7.5859	4.2659	5.3704	4.7864	6.0257	5.3704	6.7609	6.0257	6.7609
Sub4	2015-01-23	47	3	0.29	90	ur	6.26	3.02	4.7864	3.802	8.5115	6.0257	6.7609	5.3704	6.0257	5.3704	8.5115
Sub4	2015-01-23	47	3	0.29	90	ur	4.43	4.7864	6.0257	4.2659	4.7864	4.2659	4.7864	4.2659	4.7864	3.3885	5.3704
Sub4	2015-01-23	47	3	0.29	90	ur	4.79	4.7864	6.0257	3.802	5.3704	4.7864	5.3704	4.7864	6.0257	3.3885	4.7864
Sub4	2015-01-23	47	3	0.29	90	ur	6.14	9.5501	6.0257	8.5115	6.7609	8.5115	5.3704	6.0257	4.7864	6.7609	6.0257
Sub4	2015-01-23	47	3	0.29	90	ur	6.51	4.7864	9.5501	6.0257	7.5859	6.7609	7.5859	6.0257	6.7609	5.3704	6.7609
Sub4	2015-01-23	47	3	0.29	90	ur	5.27	2.3989	4.7864	3.802	4.7864	4.2659	6.0257	5.3704	6.0257	4.7864	5.3704
Sub4	2015-01-23	47	3	0.29	90	ur	4.43	6.0257	9.5501	3.802	4.2659	3.802	4.7864	3.802	5.3704	4.2659	4.7864
Sub4	2015-01-24	47	3	0.29	90	ur	6.14	4.7864	6.0257	4.7864	6.7609	6.0257	6.7609	6.0257	6.7609	5.3704	6.0257
Sub4	2015-01-24	47	3	0.29	90	ur	4.88	4.7864	6.0257	4.7864	6.0257	3.802	4.7864	4.2659	6.0257	4.7864	6.0257
Sub4	2015-01-24	47	3	0.29	90	ur	6.89	3.02	3.802	3.02	3.802	3.02	8.5115	7.5859	8.5115	7.5859	8.5115
Sub4	2015-01-24	47	3	0.29	90	ur	4.11	3.802	7.5859	4.7864	6.0257	3.802	4.7864	4.2659	4.7864	3.02	4.2659
Sub4	2015-01-24	47	3	0.29	90	ur	6.89	4.7864	7.5859	5.3704	8.5115	6.0257	7.5859	6.0257	7.5859	6.7609	7.5859
Sub4	2015-01-24	47	3	0.29	90	ur	4.79	3.802	4.7864	3.802	4.2659	3.802	4.2659	3.802	6.0257	5.3704	6.0257
Sub4	2015-01-24	47	3	0.29	90	ur	3.32	9.5501	4.7864	6.0257	3.3885	3.802	3.3885	3.802	3.02	3.3885	2.6916
Sub4	2015-01-24	47	3	0.29	90	ur	4.79	4.7864	6.0257	3.802	6.0257	4.2659	4.7864	4.2659	5.3704	4.7864	5.3704
Sub4	2015-01-24	47	3	0.29	90	ur	7.16	9.5501	7.5859	9.5501	6.0257	6.7609	6.0257	7.5859	6.7609	9.5501	6.7609
Sub4	2015-01-24	47	3	0.29	90	ur	7.88	6.0257	7.5859	6.0257	8.5115	7.5859	10.7154	7.5859	8.5115	6.0257	7.5859
Sub4	2015-01-24	47	3	0.29	90	ur	4.35	3.802	4.7864	3.3885	4.7864	4.2659	4.7864	4.2659	4.7864	3.802	4.2659
Sub4	2015-01-24	47	3	0.29	90	ur	4.7	3.802	7.5859	3.802	4.2659	3.802	4.7864	4.2659	5.3704	4.7864	5.3704
Sub4	2015-01-24	47	3	0.29	90	ur	4.79	6.0257	7.5859	5.3704	6.7609	4.7864	5.3704	4.2659	4.7864	4.2659	5.3704
Sub4	2015-01-24	47	3	0.29	90	ur	5.47	4.7864	9.5501	6.0257	6.7609	4.2659	4.7864	4.2659	7.5859	5.3704	7.5859
Sub4	2015-01-24	47	3	0.29	90	ur	5.58	4.7864	7.5859	6.0257	6.7609	6.0257	6.7609	6.0257	6.7609	3.802	4.7864
Sub4	2015-01-24	47	3	0.29	90	ur	9.19	3.02	6.0257	4.2659	5.3704	4.7864	10.7154	9.5501	10.7154	9.5501	12.0228
Sub4	2015-01-25	47	3	0.29	90	ur	6.38	13.4898	6.7609	8.5115	6.7609	9.5501	6.0257	6.7609	5.3704	6.0257	5.3704
Sub4	2015-01-25	47	3	0.29	90	ur	5.69	4.2659	5.3704	3.802	5.3704	4.7864	6.0257	5.3704	6.7609	5.3704	6.0257
Sub4	2015-01-25	47	3	0.29	90	ur	6.76	5.3704	8.5115	6.7609	7.5859	6.7609	7.5859	6.7609	7.5859	5.3704	6.7609
Sub4	2015-01-25	47	3	0.29	90	ur	6.76	5.3704	8.5115	5.3704	6.7609	6.0257	7.5859	6.7609	7.5859	6.0257	6.7609
Sub4	2015-01-25	47	3	0.29	90	ur	5.69	3.3885	5.3704	4.2659	6.0257	5.3704	6.0257	4.7864	6.0257	4.7864	7.5859
Sub4	2015-01-25	47	3	0.29	90	dl	5.27	6.7609	8.5115	4.7864	6.7609	4.2659	5.3704	3.3885	6.7609	6.0257	6.7609
Sub4	2015-01-25	47	3	0.29	90	dl	2.85	1.349	2.138	1.6983	2.3989	2.138	2.6916	2.138	3.3885	3.02	4.2659
Sub4	2015-01-25	47	3	0.29	90	dl	3.2	4.2659	5.3704	2.6916	3.3885	3.02	3.3885	3.02	3.3885	3.02	3.3885
Sub4	2015-01-25	47	3	0.29	90	dl	3.45	4.2659	5.3704	3.802	4.2659	2.6916	3.802	3.3885	3.802	2.6916	4.7864
Sub4	2015-01-25	47	3	0.29	90	dl	4.18	5.3704	6.7609	4.7864	5.3704	3.802	4.2659	3.802	4.2659	3.802	5.3704
Sub5	2015-03-06	47	3	0.29	90	dr	5.37	6.0257	7.5859	6.0257	6.7609	5.3704	6.0257	4.7864	6.0257	4.7864	5.3704
Sub5	2015-03-06	47	3	0.29	90	dr	6.51	12.0228	6.0257	8.5115	5.3704	7.5859	6.0257	6.7609	6.0257	6.7609	6.0257
Sub5	2015-03-06	47	3	0.29	90	dr	5.8	6.0257	7.5859	6.0257	6.7609	6.0257	6.7609	5.3704	6.0257	4.7864	6.0257
Sub5	2015-03-06	47	3	0.29	90	dr	7.44	12.0228	9.5501	12.0228	10.7154	12.0228	8.5115	9.5501	5.3704	6.0257	5.3704
Sub5	2015-03-06	47	3	0.29	90	dr	4.35	3.802	4.7864	3.02	4.7864	4.2659	4.7864	4.2659	4.7864	3.802	4.2659
Sub5	2015-03-06	47	3	0.29	90	ul	8.68	12.0228	9.5501	13.4898	12.0228	13.4898	7.5859	9.5501	8.5115	10.7154	4.7864
Sub5	2015-03-06	47	3	0.29	90	ul	6.26	3.02	6.0257	4.7864	5.3704	4.2659	6.0257	4.7864	7.5859	6.7609	9.5501
Sub5	2015-03-06	47	3	0.29	90	ul	5.69	4.7864	6.0257	4.7864	5.3704	4.7864	6.7609	5.3704	6.0257	5.3704	6.0257
Sub5	2015-03-06	47	3	0.29	90	ul	6.38	12.0228	9.5501	12.0228	7.5859	8.5115	6.0257	6.7609	4.7864	8.5115	4.7864
Sub5	2015-03-06	47	3	0.29	90	ul	6.03	15.1358	12.0228	15.1358	6.0257	6.7609	5.3704	6.0257	5.3704	6.7609	6.0257
Sub5	2015-03-07	47	3	0.29	90	dr	2.14	1.9055	3.02	1.6983	1.9055	1.349	1.6983	1.5136	3.02	2.3989	3.802
Sub5	2015-03-07	47	3	0.29	90	dr	4.88	4.7864	6.0257	4.7864	6.0257	5.3704	6.7609	3.802	4.7864	4.2659	4.7864
Sub5	2015-03-07	47	3	0.29	90	dr	3.14	4.7864	6.0257	4.2659	4.7864	2.138	3.02	2.6916	3.802	3.02	4.7864
Sub5	2015-03-07	47	3	0.29	90	dr	2.54	1.9055	2.3989	1.9055	2.138	1.6983	2.3989	2.138	3.02	2.6916	3.802
Sub5	2015-03-07	47	3	0.29	90	dr	4.35	4.7864	7.5859	6.0257	7.5859	4.2659	6.0257	4.7864	5.3704	3.02	3.3885
Sub5	2015-03-07	47	3	0.29	90	dr	3.32	3.802	6.0257	3.3885	3.802	3.3885	3.802	3.02	3.3885	2.6916	3.802
Sub5	2015-03-07	47	3	0.29	90	dr	3.39	6.0257	7.5859	4.2659	4.7864	3.3885	3.802	3.02	3.3885	2.6916	4.2659
Sub5	2015-03-07	47	3	0.29	90	dr	4.27	9.5501	4.7864	6.0257	5.3704	6.0257	3.802	4.7864	3.3885	4.2659	3.802
Sub5	2015-03-07	47	3	0.29	90	dr	4.35	4.7864	7.5859	6.0257	6.7609	4.7864	5.3704	3.802	4.2659	3.802	4.2659
Sub5	2015-03-07	47	3	0.29	90	dr	5.58	9.5501	6.0257	7.5859	6.0257	6.7609	5.3704	6.0257	4.7864	6.0257	4.7864
Sub5	2015-03-07	47	3	0.29	90	dr	4.11	6.0257	9.5501	6.7609	7.5859	4.2659	4.7864	3.802	4.2659	3.3885	4.2659
Sub5	2015-03-07	47	3	0.29	90	dr	4.43	3.802	4.7864	3.02	3.802	3.3885	4.7864	4.2659	4.7864	4.2659	5.3704
Sub5	2015-03-07	47	3	0.29	90	dr	3.95	3.802	6.0257	4.2659	6.7609	4.7864	5.3704	3.02	3.802	3.3885	3.802
Sub5	2015-03-07	47	3	0.29	90	dr	4.11	6.0257	7.5859	6.0257	6.7609	3.3885	4.7864	3.802	4.2659	3.802	4.7864
Sub5	2015-03-07	47	3	0.29	90	dr	4.97	6.0257	7.5859	4.2659	4.7864	3.802	4.2659	3.802	6.7609	5.3704	6.7609
Sub5	2015-03-07	47	3	0.29	90	dr	4.03	12.0228	4.7864	6.7609	4.7864	5.3704	3.802	4.2659	3.02	4.7864	3.3885
Sub5	2015-03-08	47	3	0.29	90	dr	4.61	4.7864	6.0257	4.7864	5.3704	4.2659	4.7864	4.2659	4.7864	4.2659	5.3704
Sub5	2015-03-08	47	3	0.29	90	dr	4.97	4.7864	6.0257	4.7864	6.0257	4.2659	5.3704	4.7864	5.3704	4.7864	5.3704
Sub5	2015-03-08	47	3	0.29	90	dr	3.66	4.7864	6.0257	3.802	5.3704	4.7864	5.3704	2.6916	3.802	2.3989	3.802
Sub5	2015-03-08	47	3	0.29	90	dr	4.52	3.02	3.802	2.6916	5.3704	3.802	6.0257	4.7864	5.3704	3.3885	4.2659
Sub5	2015-03-08	47	3	0.29	90	dr	3.8	3.802	4.7864	2.6916	3.3885	3.02	4.2659	3.802	4.7864	3.3885	3.802
Sub5	2015-03-08	47	3	0.29	90	dr	3.2	9.5501	3.802	4.7864	2.6916	3.3885	3.02	3.3885	3.02	3.3885	3.02
Sub5	2015-03-08	47	3	0.29	90	dr	4.18	3.802	6.0257	4.7864	6.0257	5.3704	6.0257	3.802	4.2659	2.6916	3.802
Sub5	2015-03-08	47	3	0.29	90	dr	5.69	3.802	7.5859	6.0257	6.7609	5.3704	6.7609	5.3704	6.0257	4.7864	6.0257
Sub5	2015-03-08	47	3	0.29	90	dr	3.59	3.802	4.7864	3.3885	3.802	3.3885	3.802	3.3885	3.802	3.3885	3.802
Sub5	2015-03-08	47	3	0.29	90	dr	4.11	3.802	4.7864	3.802	4.2659	3.802	4.2659	3.802	4.2659	3.802	4.7864
Sub5	2015-03-08	47	3	0.29	90	dr	4.11	2.3989	4.7864	3.802	4.7864	3.802	4.7864	3.802	4.2659	3.802	4.2659
Sub5	2015-03-08	47	3	0.29	90	dr	2.74	2.3989	3.02	2.138	2.6916	2.3989	3.3885	3.02	3.3885	2.138	2.3989
Sub5	2015-03-08	47	3	0.29	90	dr	3.32	9.5501	7.5859	10.7154	3.802	4.2659	3.02	3.802	3.02	3.3885	2.6916
Sub5	2015-03-08	47	3	0.29	90	dr	3.8	3.02	4.7864	3.802	4.2659	3.802	4.2659	3.3885	4.2659	3.3885	3.802
Sub5	2015-03-08	47	3	0.29	90	dr	4.11	12.0228	6.0257	7.5859	6.7609	7.5859	4.2659	4.7864	3.02	3.3885	3.02
Sub5	2015-03-08	47	3	0.29	90	dr	3.02	3.02	3.802	3.02	3.3885	3.02	3.3885	2.6916	3.02	2.6916	3.3885
Sub5	2015-03-09	47	3	0.29	90	dr	3.39	4.7864	6.0257	3.3885	3.802	3.02	4.7864	3.3885	3.802	2.6916	3.02
Sub5	2015-03-09	47	3	0.29	90	dr	6.26	4.7864	9.5501	7.5859	8.5115	6.0257	6.7609	6.0257	7.5859	5.3704	6.0257
Sub5	2015-03-09	47	3	0.29	90	dr	3.66	6.0257	7.5859	6.0257	6.7609	3.3885	3.802	3.02	4.2659	3.3885	4.2659
Sub5	2015-03-09	47	3	0.29	90	dr	4.03	12.0228	6.0257	12.0228	3.3885	4.2659	3.802	5.3704	3.3885	4.2659	3.3885
Sub5	2015-03-09	47	3	0.29	90	dr	5.91	6.0257	7.5859	6.0257	7.5859	5.3704	6.7609	5.3704	6.0257	5.3704	6.7609
Sub5	2015-03-09	47	3	0.29	90	dr	2.02	4.7864	7.5859	2.3989	2.6916	1.5136	2.3989	1.5136	2.3989	2.138	2.3989
Sub5	2015-03-09	47	3	0.29	90	dr	5.17	6.0257	7.5859	6.0257	6.7609	6.0257	6.7609	4.7864	5.3704	3.802	4.7864
Sub5	2015-03-09	47	3	0.29	90	dr	2.54	9.5501	3.02	3.802	2.138	2.6916	2.3989	2.6916	2.3989	2.6916	2.3989
Sub5	2015-03-09	47	3	0.29	90	dr	4.03	6.0257	7.5859	4.2659	4.7864	4.2659	4.7864	4.2659	4.7864	3.02	3.3885
Sub5	2015-03-09	47	3	0.29	90	dr	5.69	4.7864	7.5859	6.0257	6.7609	6.0257	6.7609	6.0257	6.7609	4.2659	4.7864
Sub5	2015-03-09	47	3	0.29	90	dr	3.73	6.0257	12.0228	4.7864	5.3704	3.802	4.2659	3.3885	3.802	3.02	4.2659
Sub5	2015-03-09	47	3	0.29	90	dr	5.69	6.0257	9.5501	7.5859	8.5115	4.7864	6.7609	4.7864	6.0257	5.3704	6.7609
Sub5	2015-03-09	47	3	0.29	90	dr	4.18	4.7864	7.5859	3.802	4.7864	4.2659	4.7864	4.2659	4.7864	3.3885	3.802
Sub5	2015-03-09	47	3	0.29	90	dr	3.02	3.02	4.7864	3.02	3.3885	2.6916	3.02	2.3989	3.3885	3.02	3.802
Sub5	2015-03-09	47	3	0.29	90	dr	2.26	4.7864	6.0257	1.6983	2.6916	2.138	2.3989	1.9055	3.3885	1.6983	2.3989
Sub5	2015-03-09	47	3	0.29	90	dr	4.11	4.7864	6.0257	4.7864	6.7609	3.802	4.7864	3.802	4.2659	3.802	4.2659
Sub5	2015-03-10	47	3	0.29	90	dr	4.52	3.02	6.0257	4.2659	4.7864	4.2659	5.3704	4.2659	4.7864	3.802	4.7864
Sub5	2015-03-10	47	3	0.29	90	dr	3.32	19.0549	4.7864	6.0257	4.7864	5.3704	3.02	3.3885	3.02	3.3885	2.3989
Sub5	2015-03-10	47	3	0.29	90	dr	2.85	3.802	4.7864	3.802	5.3704	2.138	3.3885	2.6916	3.02	2.6916	3.3885
Sub5	2015-03-10	47	3	0.29	90	dr	2.54	9.5501	1.9055	2.3989	2.138	2.6916	2.3989	2.6916	2.3989	2.6916	2.3989
Sub5	2015-03-10	47	3	0.29	90	dr	2.8	6.0257	9.5501	4.7864	5.3704	2.6916	3.02	2.3989	2.6916	2.3989	3.802
Sub5	2015-03-10	47	3	0.29	90	dr	2.59	3.802	4.7864	1.9055	2.138	1.9055	2.6916	2.3989	2.6916	2.3989	3.802
Sub5	2015-03-10	47	3	0.29	90	dr	2.26	1.2023	1.9055	1.5136	1.9055	1.6983	1.9055	1.6983	2.6916	2.3989	3.802
Sub5	2015-03-10	47	3	0.29	90	dr	4.43	3.802	4.7864	3.802	6.0257	4.7864	6.0257	4.2659	4.7864	3.3885	3.802
Sub5	2015-03-10	47	3	0.29	90	dr	2.26	4.7864	7.5859	5.3704	6.0257	3.3885	3.802	1.6983	1.9055	1.6983	1.9055
Sub5	2015-03-10	47	3	0.29	90	dr	1.8	9.5501	1.9055	2.3989	1.5136	1.9055	1.5136	2.3989	1.6983	2.3989	1.2023
Sub5	2015-03-10	47	3	0.29	90	dr	4.43	4.7864	6.0257	4.2659	4.7864	3.802	4.7864	4.2659	4.7864	4.2659	4.7864
Sub5	2015-03-10	47	3	0.29	90	dr	6.51	4.7864	12.0228	8.5115	9.5501	7.5859	9.5501	7.5859	8.5115	3.02	5.3704
Sub5	2015-03-10	47	3	0.29	90	dr	6.26	3.02	7.5859	6.0257	12.0228	5.3704	6.7609	6.0257	9.5501	4.7864	6.0257
Sub5	2015-03-10	47	3	0.29	90	dr	4.88	3.02	3.802	2.3989	3.02	2.6916	3.02	2.6916	8.5115	7.5859	9.5501
Sub5	2015-03-10	47	3	0.29	90	dr	3.08	1.9055	4.7864	2.6916	3.802	3.02	3.3885	3.02	3.3885	2.6916	3.02
Sub5	2015-03-10	47	3	0.29	90	dr	2.31	3.802	4.7864	2.6916	3.02	2.6916	3.02	1.9055	2.138	1.9055	2.3989
Sub5	2015-03-11	47	3	0.29	90	dr	2.31	3.02	4.7864	2.3989	2.6916	1.9055	2.6916	2.3989	3.02	1.9055	2.138
Sub5	2015-03-11	47	3	0.29	90	dr	2.26	2.3989	3.02	2.138	2.3989	1.9055	2.3989	2.138	2.6916	2.138	2.3989
Sub5	2015-03-11	47	3	0.29	90	dr	2.45	3.802	4.7864	3.3885	3.802	3.3885	3.802	2.138	2.3989	1.6983	1.9055
Sub5	2015-03-11	47	3	0.29	90	dr	1.87	1.9055	2.3989	1.9055	2.138	1.349	1.9055	1.6983	1.9055	1.6983	3.02
Sub5	2015-03-11	47	3	0.29	90	dr	1.48	2.3989	3.802	2.6916	3.02	1.349	1.6983	1.349	1.5136	1.349	1.6983
Sub5	2015-03-11	47	3	0.29	90	dr	2.64	2.3989	3.802	1.9055	2.3989	2.138	2.3989	1.9055	3.3885	3.02	3.3885
Sub5	2015-03-11	47	3	0.29	90	dr	1.57	1.5136	2.3989	1.5136	2.138	1.6983	2.138	1.349	1.5136	1.349	1.5136
Sub5	2015-03-11	47	3	0.29	90	dr	2.8	2.3989	3.02	1.9055	2.6916	2.3989	3.02	2.6916	3.02	2.6916	3.02
Sub5	2015-03-11	47	3	0.29	90	dr	1.18	2.3989	3.02	1.349	1.9055	1.0715	1.2023	1.0715	1.349	1.0715	1.349
Sub5	2015-03-11	47	3	0.29	90	dr	2.54	1.9055	2.3989	1.9055	2.138	1.6983	1.9055	1.6983	3.802	3.3885	3.802
Sub5	2015-03-11	47	3	0.29	90	dr	3.26	19.0549	3.02	4.7864	2.3989	4.2659	3.3885	4.2659	3.3885	3.802	1.5136
Sub5	2015-03-11	47	3	0.29	90	dr	6.63	6.0257	7.5859	6.0257	6.7609	5.3704	6.0257	5.3704	9.5501	6.7609	7.5859
Sub5	2015-03-11	47	3	0.29	90	dr	1.63	2.3989	3.02	1.9055	2.138	1.5136	1.9055	1.5136	1.6983	1.5136	1.6983
Sub5	2015-03-11	47	3	0.29	90	dr	1.27	1.5136	1.9055	1.349	1.5136	1.349	1.5136	1.349	1.5136	0.955	1.0715
Sub5	2015-03-11	47	3	0.29	90	dr	1.83	1.9055	2.3989	1.5136	1.9055	1.6983	1.9055	1.6983	1.9055	1.6983	2.138
Sub5	2015-03-11	47	3	0.29	90	dr	2.8	2.3989	3.02	2.3989	3.02	2.6916	3.02	2.3989	3.3885	2.3989	3.02
Sub5	2015-03-12	47	3	0.29	90	dr	3.8	6.0257	12.0228	6.0257	6.7609	4.2659	4.7864	3.802	4.7864	2.6916	3.02
Sub5	2015-03-12	47	3	0.29	90	dr	1.98	1.5136	3.02	2.3989	2.6916	2.138	2.3989	2.138	2.3989	1.349	1.6983
Sub5	2015-03-12	47	3	0.29	90	dr	1.67	4.7864	7.5859	1.9055	2.138	1.349	1.9055	1.6983	1.9055	1.5136	1.6983
Sub5	2015-03-12	47	3	0.29	90	dr	2.64	6.0257	7.5859	5.3704	6.0257	3.3885	4.2659	3.02	3.3885	1.349	1.6983
Sub5	2015-03-12	47	3	0.29	90	dr	3.32	7.5859	9.5501	4.7864	6.0257	4.2659	4.7864	3.02	3.3885	2.3989	2.6916
Sub5	2015-03-12	47	3	0.29	90	ul	1.83	3.802	4.7864	2.6916	3.02	1.9055	2.138	1.9055	2.138	1.349	1.6983
Sub5	2015-03-12	47	3	0.29	90	ul	1.67	2.3989	3.802	1.5136	1.9055	1.6983	1.9055	1.2023	1.6983	1.5136	2.138
Sub5	2015-03-12	47	3	0.29	90	ul	3.32	4.7864	7.5859	4.2659	4.7864	4.2659	6.0257	3.3885	3.802	1.9055	2.138
Sub5	2015-03-12	47	3	0.29	90	ul	2.31	15.1358	1.9055	2.6916	2.3989	2.6916	2.3989	2.6916	2.138	2.3989	1.6983
Sub5	2015-03-12	47	3	0.29	90	ul	3.45	4.7864	6.0257	4.2659	4.7864	3.802	4.2659	3.02	3.3885	3.02	3.3885
Sub6	2015-03-06	47	3	0.29	90	ul	4.03	3.802	4.7864	3.802	4.2659	3.802	4.2659	3.802	4.2659	3.802	4.2659
Sub6	2015-03-06	47	3	0.29	90	ul	6.51	3.02	7.5859	5.3704	6.7609	6.0257	6.7609	6.0257	6.7609	6.0257	7.5859
Sub6	2015-03-06	47	3	0.29	90	ul	6.89	6.0257	9.5501	7.5859	9.5501	6.7609	7.5859	6.7609	8.5115	5.3704	6.7609
Sub6	2015-03-06	47	3	0.29	90	ul	3.14	3.02	4.7864	3.802	4.2659	3.02	3.802	3.02	3.3885	2.6916	3.02
Sub6	2015-03-06	47	3	0.29	90	ul	5.47	4.7864	6.0257	4.7864	6.0257	5.3704	6.0257	5.3704	6.0257	4.7864	5.3704
Sub6	2015-03-06	47	3	0.29	90	dr	5.17	3.802	4.7864	3.802	4.7864	3.802	6.0257	5.3704	6.0257	4.7864	5.3704
Sub6	2015-03-06	47	3	0.29	90	dr	5.07	6.0257	7.5859	6.0257	7.5859	6.7609	7.5859	3.02	4.7864	4.2659	5.3704
Sub6	2015-03-06	47	3	0.29	90	dr	6.03	6.0257	9.5501	7.5859	8.5115	6.7609	7.5859	5.3704	6.7609	4.2659	6.0257
Sub6	2015-03-06	47	3	0.29	90	dr	5.37	4.7864	6.0257	3.02	5.3704	4.2659	5.3704	4.7864	6.0257	5.3704	6.7609
Sub6	2015-03-06	47	3	0.29	90	dr	4.35	3.02	4.7864	3.802	5.3704	4.2659	4.7864	3.802	4.2659	3.802	5.3704
Sub6	2015-03-08	47	3	0.29	90	ul	6.38	4.7864	9.5501	6.7609	8.5115	7.5859	8.5115	5.3704	6.0257	5.3704	6.0257
Sub6	2015-03-08	47	3	0.29	90	ul	6.14	6.0257	12.0228	6.0257	6.7609	6.0257	7.5859	6.0257	6.7609	4.2659	6.7609
Sub6	2015-03-08	47	3	0.29	90	ul	4.7	4.7864	6.0257	4.7864	5.3704	4.2659	4.7864	4.2659	6.0257	4.2659	4.7864
Sub6	2015-03-08	47	3	0.29	90	ul	4.7	9.5501	6.0257	7.5859	6.0257	7.5859	5.3704	6.0257	3.3885	3.802	3.3885
Sub6	2015-03-08	47	3	0.29	90	ul	4.11	4.7864	6.0257	4.7864	6.0257	4.2659	4.7864	3.802	4.2659	3.3885	4.2659
Sub6	2015-03-08	47	3	0.29	90	ul	3.59	4.7864	6.0257	3.802	4.7864	3.802	4.2659	3.02	3.3885	3.02	4.2659
Sub6	2015-03-08	47	3	0.29	90	ul	4.97	3.802	4.7864	3.802	4.2659	3.802	6.0257	5.3704	6.0257	4.2659	4.7864
Sub6	2015-03-08	47	3	0.29	90	ul	4.27	4.7864	7.5859	4.2659	4.7864	4.2659	5.3704	3.3885	4.7864	3.3885	4.7864
Sub6	2015-03-08	47	3	0.29	90	ul	4.88	4.7864	6.0257	3.802	4.2659	3.802	4.7864	3.802	6.7609	4.7864	6.0257
Sub6	2015-03-08	47	3	0.29	90	ul	2.74	2.3989	3.02	1.9055	2.3989	2.138	2.3989	2.138	3.3885	3.02	3.802
Sub6	2015-03-08	47	3	0.29	90	ul	3.26	6.0257	7.5859	6.0257	6.7609	3.802	4.2659	2.6916	3.02	2.6916	3.3885
Sub6	2015-03-08	47	3	0.29	90	ul	3.59	6.0257	7.5859	2.3989	3.802	3.3885	4.2659	3.802	4.7864	2.6916	3.02
Sub6	2015-03-08	47	3	0.29	90	ul	3.52	4.7864	6.0257	4.7864	5.3704	4.7864	5.3704	2.3989	3.3885	2.6916	3.3885
Sub6	2015-03-08	47	3	0.29	90	ul	2.69	1.9055	2.3989	1.9055	2.3989	1.9055	3.02	2.6916	3.02	2.6916	3.02
Sub6	2015-03-08	47	3	0.29	90	ul	2.59	4.7864	6.0257	2.3989	2.6916	2.3989	3.02	2.6916	3.02	2.138	2.3989
Sub6	2015-03-08	47	3	0.29	90	ul	2.91	2.3989	3.802	2.3989	2.6916	2.138	3.02	2.6916	3.3885	3.02	3.3885
Sub6	2015-03-10	47	3	0.29	90	ul	5.07	4.7864	6.0257	4.7864	5.3704	4.7864	5.3704	4.2659	5.3704	4.7864	6.0257
Sub6	2015-03-10	47	3	0.29	90	ul	5.69	9.5501	4.7864	6.7609	6.0257	7.5859	5.3704	6.7609	4.7864	5.3704	4.7864
Sub6	2015-03-10	47	3	0.29	90	ul	6.38	6.0257	9.5501	5.3704	7.5859	6.7609	7.5859	6.7609	7.5859	4.7864	5.3704
Sub6	2015-03-10	47	3	0.29	90	ul	5.8	4.7864	12.0228	4.2659	6.0257	5.3704	6.7609	5.3704	6.0257	5.3704	6.0257
Sub6	2015-03-10	47	3	0.29	90	ul	3.32	4.7864	6.0257	3.3885	3.802	3.02	3.3885	2.6916	3.3885	3.02	4.7864
Sub6	2015-03-10	47	3	0.29	90	ul	6.14	3.02	6.0257	4.7864	6.7609	5.3704	6.0257	5.3704	7.5859	6.0257	6.7609
Sub6	2015-03-10	47	3	0.29	90	ul	3.32	3.02	3.802	2.6916	3.02	2.6916	3.802	2.6916	3.3885	3.02	4.7864
Sub6	2015-03-10	47	3	0.29	90	ul	4.18	3.802	6.0257	4.7864	5.3704	3.802	4.2659	3.3885	4.7864	4.2659	4.7864
Sub6	2015-03-10	47	3	0.29	90	ul	5.17	4.7864	6.0257	4.2659	6.7609	6.0257	7.5859	4.2659	4.7864	4.2659	4.7864
Sub6	2015-03-10	47	3	0.29	90	ul	5.17	2.3989	4.7864	3.02	3.3885	2.6916	5.3704	4.7864	8.5115	5.3704	6.0257
Sub6	2015-03-10	47	3	0.29	90	ul	5.37	6.0257	7.5859	4.2659	4.7864	4.2659	5.3704	4.7864	6.0257	5.3704	6.7609
Sub6	2015-03-10	47	3	0.29	90	ul	3.95	3.02	3.802	2.6916	3.802	3.3885	4.7864	3.802	4.2659	3.3885	4.2659
Sub6	2015-03-10	47	3	0.29	90	ul	4.03	3.802	6.0257	3.802	4.7864	3.802	4.2659	3.802	4.2659	3.802	4.2659
Sub6	2015-03-10	47	3	0.29	90	ul	5.47	6.0257	7.5859	6.0257	6.7609	5.3704	6.7609	6.0257	6.7609	3.802	4.7864
Sub6	2015-03-10	47	3	0.29	90	ul	4.97	9.5501	6.0257	9.5501	3.802	5.3704	4.2659	6.0257	4.2659	5.3704	4.7864
Sub6	2015-03-10	47	3	0.29	90	ul	6.51	3.802	7.5859	6.0257	6.7609	6.0257	7.5859	6.0257	6.7609	6.0257	6.7609
Sub6	2015-03-10	47	3	0.29	90	ul	4.79	4.7864	7.5859	4.2659	4.7864	3.802	4.2659	3.802	7.5859	4.7864	5.3704
Sub6	2015-03-11	47	3	0.29	90	ul	4.18	4.7864	6.0257	4.7864	5.3704	4.7864	5.3704	4.2659	4.7864	3.02	3.3885
Sub6	2015-03-11	47	3	0.29	90	ul	5.58	9.5501	4.7864	6.0257	5.3704	6.0257	5.3704	6.0257	5.3704	6.0257	4.7864
Sub6	2015-03-11	47	3	0.29	90	ul	3.8	4.7864	6.0257	3.802	4.2659	3.802	4.7864	3.802	4.2659	3.02	3.3885
Sub6	2015-03-11	47	3	0.29	90	ul	3.73	4.7864	6.0257	4.2659	4.7864	4.2659	4.7864	2.6916	3.802	3.02	4.2659
Sub6	2015-03-11	47	3	0.29	90	ul	4.52	4.7864	6.0257	4.7864	5.3704	4.2659	5.3704	4.2659	4.7864	3.802	4.7864
Sub6	2015-03-11	47	3	0.29	90	ul	4.11	3.802	6.0257	3.3885	4.2659	3.802	4.2659	3.802	4.2659	3.802	4.7864
Sub6	2015-03-11	47	3	0.29	90	ul	2.45	2.3989	3.02	1.6983	2.3989	2.138	2.6916	2.138	3.3885	2.138	2.3989
Sub6	2015-03-11	47	3	0.29	90	ul	4.97	6.0257	7.5859	6.0257	6.7609	5.3704	6.0257	4.7864	6.0257	3.802	4.2659
Sub6	2015-03-11	47	3	0.29	90	ul	3.8	3.02	4.7864	3.802	5.3704	4.7864	5.3704	3.3885	3.802	2.6916	3.3885
Sub6	2015-03-11	47	3	0.29	90	ul	3.2	9.5501	3.02	3.802	3.3885	3.802	3.02	3.3885	3.02	3.3885	2.6916
Sub6	2015-03-11	47	3	0.29	90	ul	3.2	1.9055	3.02	2.3989	3.02	2.6916	3.3885	3.02	3.3885	3.02	3.802
Sub6	2015-03-11	47	3	0.29	90	ul	4.35	6.0257	9.5501	4.7864	7.5859	4.7864	5.3704	4.2659	4.7864	3.3885	3.802
Sub6	2015-03-11	47	3	0.29	90	ul	3.95	6.0257	7.5859	5.3704	6.0257	4.7864	6.0257	3.802	4.2659	2.6916	3.02
Sub6	2015-03-11	47	3	0.29	90	ul	3.88	3.02	3.802	3.02	3.802	3.3885	4.2659	3.802	4.2659	3.3885	4.2659
Sub6	2015-03-11	47	3	0.29	90	ul	4.11	6.0257	7.5859	3.3885	4.2659	3.802	4.2659	3.802	4.7864	3.802	4.2659
Sub6	2015-03-11	47	3	0.29	90	ul	2.85	4.7864	6.0257	3.02	3.802	3.3885	3.802	2.3989	2.6916	2.3989	2.6916
Sub6	2015-03-12	47	3	0.29	90	ul	3.73	3.802	4.7864	3.802	4.2659	3.802	4.2659	3.3885	4.7864	3.02	3.3885
Sub6	2015-03-12	47	3	0.29	90	ul	5.8	9.5501	7.5859	9.5501	6.7609	7.5859	5.3704	6.7609	5.3704	6.0257	4.2659
Sub6	2015-03-12	47	3	0.29	90	ul	6.76	9.5501	6.0257	7.5859	6.7609	7.5859	6.7609	7.5859	6.0257	6.7609	6.0257
Sub6	2015-03-12	47	3	0.29	90	ul	4.7	6.0257	7.5859	4.7864	6.0257	4.7864	5.3704	4.2659	6.0257	3.802	4.2659
Sub6	2015-03-12	47	3	0.29	90	ul	2.96	3.802	4.7864	3.3885	3.802	3.02	3.3885	2.6916	3.02	2.6916	3.02
Sub6	2015-03-12	47	3	0.29	90	ul	4.27	9.5501	4.7864	6.0257	5.3704	6.0257	5.3704	6.0257	3.02	3.3885	3.02
Sub6	2015-03-12	47	3	0.29	90	ul	3.66	3.02	4.7864	3.802	4.7864	3.02	4.2659	3.802	4.7864	2.6916	3.802
Sub6	2015-03-12	47	3	0.29	90	ul	3.52	3.802	4.7864	3.02	3.3885	3.02	3.802	3.3885	3.802	3.3885	3.802
Sub6	2015-03-12	47	3	0.29	90	ul	5.17	4.7864	6.0257	4.7864	5.3704	4.7864	6.0257	5.3704	6.0257	4.2659	4.7864
Sub6	2015-03-12	47	3	0.29	90	ul	4.35	4.7864	6.0257	4.7864	5.3704	3.02	4.7864	4.2659	5.3704	4.2659	4.7864
Sub6	2015-03-12	47	3	0.29	90	ul	2.91	2.3989	3.802	3.02	3.3885	3.02	3.3885	2.3989	3.02	2.6916	3.02
Sub6	2015-03-12	47	3	0.29	90	ul	3.52	3.802	4.7864	3.02	3.3885	3.02	3.802	3.3885	3.802	3.3885	3.802
Sub6	2015-03-12	47	3	0.29	90	ul	4.43	9.5501	6.0257	7.5859	5.3704	6.0257	4.2659	5.3704	3.3885	4.2659	3.802
Sub6	2015-03-12	47	3	0.29	90	ul	3.45	3.802	4.7864	3.802	4.2659	3.3885	3.802	3.3885	3.802	3.02	3.3885
Sub6	2015-03-12	47	3	0.29	90	ul	4.97	4.7864	6.0257	4.7864	5.3704	4.7864	6.0257	5.3704	6.0257	3.802	4.2659
Sub6	2015-03-12	47	3	0.29	90	ul	3.02	9.5501	2.3989	3.02	2.3989	3.02	2.6916	3.3885	2.3989	4.2659	2.6916
Sub6	2015-03-13	47	3	0.29	90	ul	3.52	9.5501	4.7864	6.7609	3.02	3.802	3.02	3.3885	3.02	4.2659	3.802
Sub6	2015-03-13	47	3	0.29	90	ul	4.43	3.802	4.7864	3.802	4.2659	3.802	4.7864	4.2659	5.3704	3.802	4.7864
Sub6	2015-03-13	47	3	0.29	90	ul	3.52	3.802	4.7864	3.802	4.7864	3.802	4.2659	3.3885	4.2659	2.6916	3.02
Sub6	2015-03-13	47	3	0.29	90	ul	4.79	9.5501	4.7864	6.0257	5.3704	6.0257	4.7864	5.3704	4.2659	4.7864	3.802
Sub6	2015-03-13	47	3	0.29	90	ul	4.35	4.7864	6.0257	4.7864	5.3704	4.7864	5.3704	4.7864	5.3704	3.02	3.3885
Sub6	2015-03-13	47	3	0.29	90	ul	4.11	3.02	3.802	3.02	4.2659	3.802	4.7864	4.2659	5.3704	3.02	3.802
Sub6	2015-03-13	47	3	0.29	90	ul	3.66	6.0257	7.5859	3.3885	3.802	3.3885	3.802	3.3885	3.802	3.3885	4.2659
Sub6	2015-03-13	47	3	0.29	90	ul	3.32	4.7864	6.0257	4.7864	5.3704	2.6916	4.2659	3.3885	3.802	2.6916	3.3885
Sub6	2015-03-13	47	3	0.29	90	ul	4.79	4.7864	6.0257	4.2659	4.7864	4.2659	6.0257	5.3704	6.7609	3.3885	3.802
Sub6	2015-03-13	47	3	0.29	90	ul	2.85	1.9055	3.802	2.6916	3.02	2.6916	3.02	2.6916	3.02	2.6916	3.02
Sub6	2015-03-13	47	3	0.29	90	ul	3.45	3.02	4.7864	3.02	3.802	3.02	3.3885	3.02	4.2659	3.3885	3.802
Sub6	2015-03-13	47	3	0.29	90	ul	3.95	4.7864	6.0257	4.7864	5.3704	3.802	4.2659	3.3885	3.802	3.3885	5.3704
Sub6	2015-03-13	47	3	0.29	90	ul	3.95	4.7864	7.5859	4.2659	4.7864	4.2659	5.3704	2.3989	4.2659	3.802	4.2659
Sub6	2015-03-13	47	3	0.29	90	ul	2.91	3.02	3.802	2.6916	3.3885	3.02	3.3885	2.6916	3.02	2.3989	3.02
Sub6	2015-03-13	47	3	0.29	90	ul	4.43	6.0257	7.5859	4.7864	5.3704	4.7864	5.3704	4.7864	5.3704	2.6916	4.2659
Sub6	2015-03-13	47	3	0.29	90	ul	3.26	1.9055	4.7864	3.02	3.3885	2.3989	3.3885	3.02	4.2659	3.02	3.802
Sub6	2015-03-14	47	3	0.29	90	ul	4.97	4.7864	6.0257	3.802	4.7864	3.802	5.3704	4.7864	6.0257	4.7864	5.3704
Sub6	2015-03-14	47	3	0.29	90	ul	3.52	3.802	4.7864	3.02	4.2659	2.6916	4.2659	3.02	3.802	3.3885	4.2659
Sub6	2015-03-14	47	3	0.29	90	ul	2.74	3.802	6.0257	2.6916	3.3885	3.02	3.3885	2.3989	2.6916	2.3989	2.6916
Sub6	2015-03-14	47	3	0.29	90	ul	4.35	6.0257	7.5859	3.802	4.2659	3.802	5.3704	4.2659	4.7864	3.802	4.2659
Sub6	2015-03-14	47	3	0.29	90	ul	3.52	3.802	6.0257	3.3885	3.802	3.02	3.802	3.3885	3.802	3.3885	3.802
Sub6	2015-03-14	47	3	0.29	90	dr	5.17	6.0257	7.5859	6.0257	6.7609	6.0257	6.7609	5.3704	7.5859	3.02	3.802
Sub6	2015-03-14	47	3	0.29	90	dr	4.11	9.5501	4.7864	6.7609	3.3885	4.2659	3.802	4.7864	3.802	4.2659	3.802
Sub6	2015-03-14	47	3	0.29	90	dr	2.26	9.5501	3.802	4.7864	2.6916	3.02	2.3989	2.6916	1.6983	2.138	1.9055
Sub6	2015-03-14	47	3	0.29	90	dr	3.32	9.5501	3.02	3.802	3.3885	4.2659	3.02	3.3885	3.02	3.3885	3.02
Sub6	2015-03-14	47	3	0.29	90	dr	3.02	3.802	4.7864	2.3989	3.3885	3.02	3.3885	2.6916	3.3885	2.6916	3.02
Sub7	2016-04-17	47	3	0.29	90	ul	6.03	6.7609	8.5115	5.3704	6.7609	6.0257	6.7609	5.3704	6.0257	5.3704	6.7609
Sub7	2016-04-17	47	3	0.29	90	ul	6.03	6.7609	8.5115	5.3704	7.5859	6.7609	7.5859	5.3704	6.0257	4.7864	6.0257
Sub7	2016-04-17	47	3	0.29	90	ul	4.61	13.4898	4.2659	5.3704	4.7864	5.3704	4.2659	4.7864	4.2659	4.7864	4.2659
Sub7	2016-04-17	47	3	0.29	90	ul	4.97	2.6916	4.2659	3.3885	5.3704	4.7864	5.3704	4.2659	5.3704	4.7864	5.3704
Sub7	2016-04-17	47	3	0.29	90	ul	4.79	4.2659	5.3704	4.2659	5.3704	4.2659	4.7864	3.802	5.3704	4.7864	6.0257
Sub7	2016-04-17	47	3	0.29	90	ul	7.88	5.3704	8.5115	6.0257	6.7609	6.0257	8.5115	7.5859	8.5115	7.5859	9.5501
Sub7	2016-04-17	47	3	0.29	90	dr	6.76	13.4898	8.5115	10.7154	6.0257	6.7609	5.3704	7.5859	6.7609	7.5859	6.7609
Sub7	2016-04-17	47	3	0.29	90	dr	5.07	6.7609	8.5115	6.7609	7.5859	3.802	4.7864	4.2659	6.0257	5.3704	6.7609
Sub7	2016-04-17	47	3	0.29	90	dr	4.18	4.2659	5.3704	4.2659	4.7864	4.2659	4.7864	4.2659	4.7864	3.3885	3.802
Sub7	2016-04-17	47	3	0.29	90	dr	4.79	13.4898	3.3885	5.3704	4.7864	5.3704	3.802	4.7864	4.2659	6.0257	4.7864
Sub7	2016-04-17	47	3	0.29	90	dr	7.59	6.7609	10.7154	6.7609	7.5859	6.7609	7.5859	6.7609	8.5115	7.5859	8.5115
Sub7	2016-04-17	47	3	0.29	90	dr	4.43	6.7609	8.5115	4.7864	5.3704	3.802	4.2659	3.802	5.3704	4.2659	5.3704
Sub7	2016-04-17	47	3	0.29	90	ul	5.27	9.5501	4.7864	8.5115	6.0257	7.5859	4.7864	5.3704	4.2659	5.3704	4.7864
Sub7	2016-04-17	47	3	0.29	90	ul	5.17	3.802	4.7864	3.3885	6.0257	5.3704	6.0257	4.2659	5.3704	4.2659	6.0257
Sub7	2016-04-17	47	3	0.29	90	ul	6.76	6.0257	9.5501	5.3704	6.0257	5.3704	6.7609	6.0257	8.5115	6.7609	7.5859
Sub7	2016-04-17	47	3	0.29	90	ul	5.37	3.802	6.0257	4.7864	5.3704	4.7864	5.3704	4.7864	5.3704	4.7864	7.5859
Sub7	2016-04-17	47	3	0.29	90	ul	4.27	4.7864	6.0257	4.7864	5.3704	3.802	4.7864	3.802	4.2659	3.802	5.3704
Sub7	2016-04-17	47	3	0.29	90	ul	8.35	6.0257	9.5501	7.5859	9.5501	6.7609	8.5115	5.3704	10.7154	9.5501	10.7154
Sub7	2016-04-17	47	3	0.29	90	ul	9.37	12.0228	9.5501	13.4898	12.0228	15.1358	9.5501	10.7154	7.5859	8.5115	6.7609
Sub7	2016-04-17	47	3	0.29	90	ul	8.35	3.802	12.0228	6.7609	8.5115	6.7609	8.5115	7.5859	9.5501	7.5859	10.7154
Sub7	2016-04-17	47	3	0.29	90	ul	5.91	3.802	4.7864	3.3885	3.802	3.3885	4.7864	4.2659	9.5501	7.5859	8.5115
Sub7	2016-04-17	47	3	0.29	90	ul	4.97	3.802	6.0257	4.7864	5.3704	4.2659	4.7864	4.2659	6.0257	4.7864	6.0257
Sub7	2016-04-18	47	3	0.29	90	ul	4.52	9.5501	7.5859	9.5501	4.7864	6.0257	4.7864	5.3704	3.802	4.2659	3.3885
Sub7	2016-04-18	47	3	0.29	90	ul	6.14	3.802	6.0257	3.02	3.3885	3.02	7.5859	6.0257	8.5115	6.0257	7.5859
Sub7	2016-04-18	47	3	0.29	90	ul	4.18	6.0257	7.5859	4.7864	5.3704	4.2659	4.7864	4.2659	4.7864	3.02	4.2659
Sub7	2016-04-18	47	3	0.29	90	ul	4.52	3.802	4.7864	3.802	4.2659	3.802	5.3704	4.2659	4.7864	4.2659	4.7864
Sub7	2016-04-18	47	3	0.29	90	ul	3.66	2.3989	6.0257	3.802	5.3704	2.6916	4.2659	3.3885	4.2659	3.3885	4.2659
Sub7	2016-04-18	47	3	0.29	90	ul	5.27	2.3989	4.7864	3.802	4.7864	4.2659	5.3704	4.2659	6.7609	5.3704	6.0257
Sub7	2016-04-18	47	3	0.29	90	ul	4.79	9.5501	3.02	4.7864	4.2659	4.7864	3.802	5.3704	4.7864	6.0257	4.2659
Sub7	2016-04-18	47	3	0.29	90	ul	5.58	4.7864	7.5859	5.3704	6.0257	5.3704	6.0257	4.7864	5.3704	4.7864	7.5859
Sub7	2016-04-18	47	3	0.29	90	ul	3.2	3.02	4.7864	2.6916	3.02	2.6916	3.02	2.6916	3.802	3.3885	3.802
Sub7	2016-04-18	47	3	0.29	90	ul	4.7	9.5501	7.5859	9.5501	4.7864	5.3704	4.2659	5.3704	4.2659	4.7864	4.2659
Sub7	2016-04-18	47	3	0.29	90	ul	3.45	6.0257	7.5859	4.2659	4.7864	3.3885	3.802	3.3885	3.802	3.02	3.3885
Sub7	2016-04-18	47	3	0.29	90	ul	4.88	6.0257	7.5859	6.0257	6.7609	4.7864	5.3704	4.7864	5.3704	4.2659	4.7864
Sub7	2016-04-18	47	3	0.29	90	ul	2.91	6.0257	7.5859	5.3704	6.7609	2.138	2.3989	2.138	3.802	3.3885	4.2659
Sub7	2016-04-18	47	3	0.29	90	ul	5.47	6.0257	7.5859	6.0257	7.5859	6.0257	6.7609	4.7864	6.7609	4.2659	4.7864
Sub7	2016-04-18	47	3	0.29	90	ul	3.26	2.3989	3.02	2.3989	2.6916	2.3989	3.02	2.6916	3.802	3.3885	4.7864
Sub7	2016-04-20	47	3	0.29	90	ul	6.63	6.0257	9.5501	6.0257	8.5115	7.5859	8.5115	6.7609	7.5859	4.7864	5.3704
Sub7	2016-04-20	47	3	0.29	90	ul	8.35	9.5501	6.0257	7.5859	6.0257	9.5501	6.7609	8.5115	6.7609	12.0228	7.5859
Sub7	2016-04-20	47	3	0.29	90	ul	7.03	9.5501	7.5859	9.5501	8.5115	9.5501	6.7609	7.5859	6.7609	7.5859	4.7864
Sub7	2016-04-20	47	3	0.29	90	ul	8.84	15.1358	12.0228	15.1358	9.5501	10.7154	9.5501	10.7154	6.7609	8.5115	7.5859
Sub7	2016-04-20	47	3	0.29	90	ul	5.69	4.7864	6.0257	4.2659	6.0257	5.3704	6.7609	4.7864	6.0257	5.3704	6.0257
Sub7	2016-04-20	47	3	0.29	90	ul	5.27	6.0257	7.5859	4.7864	5.3704	4.7864	8.5115	5.3704	6.0257	3.802	4.2659
Sub7	2016-04-20	47	3	0.29	90	ul	4.18	2.3989	7.5859	4.7864	5.3704	4.2659	4.7864	3.3885	3.802	3.3885	6.0257
Sub7	2016-04-20	47	3	0.29	90	ul	7.03	4.7864	7.5859	6.0257	7.5859	6.7609	8.5115	6.7609	7.5859	5.3704	7.5859
Sub7	2016-04-20	47	3	0.29	90	ul	3.73	3.02	4.7864	3.802	4.2659	3.802	4.2659	3.3885	3.802	3.3885	3.802
Sub7	2016-04-20	47	3	0.29	90	ul	5.27	3.02	3.802	3.02	3.3885	3.02	6.0257	5.3704	6.7609	5.3704	6.0257
Sub7	2016-04-20	47	3	0.29	90	ul	4.27	9.5501	7.5859	9.5501	5.3704	6.0257	3.802	4.2659	3.802	4.2659	3.802
Sub7	2016-04-20	47	3	0.29	90	ul	5.47	9.5501	3.802	5.3704	4.2659	6.0257	5.3704	6.0257	5.3704	6.0257	4.2659
Sub7	2016-04-20	47	3	0.29	90	ul	5.69	4.7864	6.0257	4.7864	6.0257	4.7864	5.3704	4.2659	7.5859	6.0257	6.7609
Sub7	2016-04-20	47	3	0.29	90	ul	4.03	3.02	3.802	3.02	3.3885	3.02	3.802	3.3885	4.2659	3.802	6.7609
Sub7	2016-04-20	47	3	0.29	90	ul	4.97	6.0257	9.5501	6.0257	6.7609	6.0257	6.7609	4.2659	5.3704	3.3885	4.7864
Sub7	2016-04-21	47	3	0.29	90	ul	3.2	6.0257	7.5859	3.802	4.2659	3.02	3.3885	3.02	3.3885	3.02	3.3885
Sub7	2016-04-21	47	3	0.29	90	ul	5.8	3.802	4.7864	3.802	5.3704	4.7864	6.7609	6.0257	7.5859	4.7864	5.3704
Sub7	2016-04-21	47	3	0.29	90	ul	5.07	9.5501	6.0257	7.5859	5.3704	6.7609	5.3704	7.5859	3.3885	4.7864	3.802
Sub7	2016-04-21	47	3	0.29	90	ul	4.43	3.802	6.0257	4.7864	5.3704	4.7864	5.3704	3.802	4.7864	3.802	4.2659
Sub7	2016-04-21	47	3	0.29	90	ul	3.95	6.0257	7.5859	3.802	4.7864	4.2659	4.7864	3.3885	4.2659	3.3885	3.802
Sub7	2016-04-21	47	3	0.29	90	ul	2.91	4.7864	6.0257	2.6916	3.02	2.6916	3.02	2.6916	3.02	2.6916	3.3885
Sub7	2016-04-21	47	3	0.29	90	ul	4.43	3.802	4.7864	2.6916	4.2659	3.802	4.7864	4.2659	7.5859	3.3885	3.802
Sub7	2016-04-21	47	3	0.29	90	ul	5.07	6.0257	7.5859	5.3704	6.0257	4.7864	6.7609	4.2659	5.3704	4.2659	5.3704
Sub7	2016-04-21	47	3	0.29	90	ul	3.08	3.802	4.7864	3.02	3.3885	3.02	3.3885	2.6916	3.02	2.3989	4.2659
Sub7	2016-04-21	47	3	0.29	90	ul	4.11	2.3989	4.7864	3.802	4.7864	4.2659	4.7864	3.802	4.2659	3.3885	4.2659
Sub7	2016-04-21	47	3	0.29	90	ul	3.73	6.0257	7.5859	4.7864	5.3704	3.802	4.2659	3.3885	3.802	3.3885	3.802
Sub7	2016-04-21	47	3	0.29	90	ul	3.14	4.7864	6.0257	3.802	4.2659	3.02	3.802	2.3989	3.02	2.6916	4.2659
Sub7	2016-04-21	47	3	0.29	90	ul	5.27	9.5501	4.7864	7.5859	6.7609	7.5859	4.7864	5.3704	4.2659	5.3704	4.7864
Sub7	2016-04-21	47	3	0.29	90	ul	4.52	4.7864	6.0257	4.2659	5.3704	4.2659	5.3704	3.802	4.7864	4.2659	4.7864
Sub7	2016-04-21	47	3	0.29	90	ul	3.26	2.3989	3.802	3.02	3.802	3.02	3.3885	3.02	3.3885	3.02	3.802
Sub7	2016-04-22	47	3	0.29	90	ul	6.26	6.0257	7.5859	6.0257	6.7609	4.7864	6.7609	4.7864	8.5115	6.0257	7.5859
Sub7	2016-04-22	47	3	0.29	90	ul	5.69	12.0228	4.7864	6.7609	4.2659	5.3704	4.7864	5.3704	4.2659	8.5115	6.7609
Sub7	2016-04-22	47	3	0.29	90	ul	4.03	4.7864	7.5859	4.2659	4.7864	4.2659	4.7864	3.802	4.2659	3.3885	3.802
Sub7	2016-04-22	47	3	0.29	90	ul	3.32	6.0257	7.5859	4.7864	5.3704	3.3885	3.802	3.02	3.3885	3.02	3.3885
Sub7	2016-04-22	47	3	0.29	90	ul	4.35	4.7864	6.0257	3.3885	4.2659	3.02	4.7864	4.2659	4.7864	3.802	6.0257
Sub7	2016-04-22	47	3	0.29	90	ul	6.03	3.02	6.0257	4.2659	6.0257	5.3704	6.0257	5.3704	6.7609	6.0257	6.7609
Sub7	2016-04-22	47	3	0.29	90	ul	5.17	6.0257	7.5859	3.3885	4.7864	4.2659	6.7609	4.7864	5.3704	4.7864	5.3704
Sub7	2016-04-22	47	3	0.29	90	ul	5.27	4.7864	6.0257	4.7864	5.3704	4.2659	5.3704	4.7864	6.0257	5.3704	6.0257
Sub7	2016-04-22	47	3	0.29	90	ul	4.35	9.5501	3.02	3.802	3.3885	4.2659	3.802	4.7864	4.2659	4.7864	4.2659
Sub7	2016-04-22	47	3	0.29	90	ul	2.91	3.802	4.7864	3.02	3.3885	2.6916	3.02	2.6916	3.02	2.6916	3.3885
Sub7	2016-04-22	47	3	0.29	90	ul	4.61	4.7864	6.0257	4.2659	4.7864	3.802	4.2659	3.802	6.0257	4.7864	5.3704
Sub7	2016-04-22	47	3	0.29	90	ul	2.45	9.5501	1.9055	2.6916	2.3989	2.6916	2.3989	2.6916	2.3989	2.6916	1.9055
Sub7	2016-04-22	47	3	0.29	90	ul	3.8	4.7864	6.0257	4.7864	5.3704	3.802	4.2659	3.3885	3.802	3.3885	4.2659
Sub7	2016-04-22	47	3	0.29	90	ul	3.26	3.802	4.7864	3.802	4.2659	2.6916	3.3885	2.6916	3.802	3.3885	3.802
Sub7	2016-04-22	47	3	0.29	90	ul	4.43	3.802	6.0257	4.2659	6.0257	4.7864	6.7609	3.3885	4.2659	3.802	4.2659
Sub7	2016-04-23	47	3	0.29	90	ul	4.43	2.6916	3.3885	2.3989	4.2659	3.802	4.7864	4.2659	4.7864	4.2659	4.7864
Sub7	2016-04-23	47	3	0.29	90	ul	4.43	5.3704	6.7609	5.3704	6.0257	3.3885	4.7864	4.2659	4.7864	4.2659	5.3704
Sub7	2016-04-23	47	3	0.29	90	ul	5.37	13.4898	1.6983	3.802	3.3885	6.7609	4.2659	5.3704	4.7864	6.0257	5.3704
Sub7	2016-04-23	47	3	0.29	90	ul	3.8	2.6916	3.3885	2.6916	3.3885	3.02	4.2659	3.3885	4.2659	3.3885	4.7864
Sub7	2016-04-23	47	3	0.29	90	ul	4.35	4.2659	5.3704	3.3885	3.802	3.3885	4.7864	3.802	5.3704	4.2659	4.7864
Sub7	2016-04-23	47	3	0.29	90	dr	3.95	8.5115	10.7154	5.3704	6.7609	4.7864	5.3704	3.802	4.7864	2.6916	3.02
Sub7	2016-04-23	47	3	0.29	90	dr	3.32	3.3885	5.3704	3.802	4.7864	3.02	3.3885	3.02	3.3885	3.02	4.2659
Sub7	2016-04-23	47	3	0.29	90	dr	4.88	5.3704	6.7609	5.3704	6.0257	4.7864	5.3704	4.2659	5.3704	3.802	6.0257
Sub7	2016-04-23	47	3	0.29	90	dr	5.37	6.7609	8.5115	6.0257	6.7609	5.3704	6.0257	4.7864	6.0257	4.7864	5.3704
Sub7	2016-04-23	47	3	0.29	90	dr	3.14	3.3885	4.2659	2.6916	3.802	3.02	4.2659	2.6916	3.02	2.6916	3.3885
Sub7	2016-04-23	47	3	0.29	90	dr	6.63	5.3704	6.7609	5.3704	7.5859	6.7609	7.5859	6.7609	7.5859	5.3704	6.0257
Sub8	2016-04-16	47	3	0.29	90	ul	9.92	6.7609	10.7154	8.5115	10.7154	9.5501	12.0228	9.5501	10.7154	8.5115	9.5501
Sub8	2016-04-16	47	3	0.29	90	ul	7.73	6.7609	10.7154	7.5859	9.5501	7.5859	8.5115	7.5859	8.5115	6.7609	7.5859
Sub8	2016-04-16	47	3	0.29	90	ul	7.44	4.2659	8.5115	6.7609	9.5501	8.5115	9.5501	6.0257	6.7609	6.0257	8.5115
Sub8	2016-04-16	47	3	0.29	90	ul	6.38	13.4898	6.7609	9.5501	6.0257	6.7609	6.0257	6.7609	6.0257	6.7609	6.0257
Sub8	2016-04-16	47	3	0.29	90	ul	9.19	16.9827	8.5115	10.7154	9.5501	10.7154	8.5115	9.5501	8.5115	9.5501	8.5115
Sub8	2016-04-16	47	3	0.29	90	ul	7.03	6.7609	8.5115	6.7609	7.5859	6.7609	8.5115	7.5859	8.5115	4.7864	6.7609
Sub8	2016-04-16	47	3	0.29	90	dr	7.3	4.2659	8.5115	6.7609	7.5859	6.7609	7.5859	6.7609	7.5859	6.7609	8.5115
Sub8	2016-04-16	47	3	0.29	90	dr	7.44	6.7609	8.5115	6.7609	8.5115	7.5859	9.5501	6.7609	7.5859	6.0257	7.5859
Sub8	2016-04-16	47	3	0.29	90	dr	6.63	8.5115	10.7154	6.7609	7.5859	6.0257	7.5859	6.7609	7.5859	5.3704	6.7609
Sub8	2016-04-16	47	3	0.29	90	dr	5.91	5.3704	8.5115	5.3704	7.5859	6.7609	7.5859	4.7864	5.3704	4.7864	6.7609
Sub8	2016-04-16	47	3	0.29	90	dr	4.43	2.6916	4.2659	3.3885	4.2659	3.3885	3.802	3.3885	6.0257	4.7864	6.0257
Sub8	2016-04-16	47	3	0.29	90	dr	5.07	6.7609	8.5115	6.0257	6.7609	6.0257	6.7609	4.7864	5.3704	3.802	4.2659
Sub8	2016-04-17	47	3	0.29	90	ul	4.43	5.3704	8.5115	5.3704	6.0257	5.3704	6.7609	3.802	4.2659	3.3885	3.802
Sub8	2016-04-17	47	3	0.29	90	ul	4.43	3.3885	5.3704	4.2659	4.7864	4.2659	5.3704	4.2659	4.7864	3.802	4.2659
Sub8	2016-04-17	47	3	0.29	90	ul	9.55	6.7609	10.7154	7.5859	10.7154	9.5501	12.0228	8.5115	10.7154	7.5859	9.5501
Sub8	2016-04-17	47	3	0.29	90	ul	6.38	8.5115	10.7154	8.5115	9.5501	8.5115	9.5501	6.0257	6.7609	4.2659	4.7864
Sub8	2016-04-17	47	3	0.29	90	ul	4.88	5.3704	6.7609	3.802	4.7864	4.2659	4.7864	4.2659	6.0257	4.7864	5.3704
Sub8	2016-04-17	47	3	0.29	90	ul	7.44	8.5115	10.7154	6.0257	7.5859	6.0257	7.5859	6.7609	8.5115	7.5859	8.5115
Sub8	2016-04-17	47	3	0.29	90	ul	4.43	2.6916	3.3885	2.138	3.802	3.3885	5.3704	4.2659	4.7864	3.802	5.3704
Sub8	2016-04-17	47	3	0.29	90	ul	3.73	4.2659	5.3704	3.802	4.7864	3.802	4.7864	3.02	3.802	3.3885	3.802
Sub8	2016-04-17	47	3	0.29	90	ul	5.91	6.7609	8.5115	6.7609	7.5859	5.3704	6.7609	6.0257	7.5859	4.2659	6.0257
Sub8	2016-04-17	47	3	0.29	90	ul	4.43	5.3704	6.7609	4.2659	4.7864	3.802	4.7864	4.2659	4.7864	3.802	5.3704
Sub8	2016-04-17	47	3	0.29	90	ul	5.07	6.7609	8.5115	5.3704	6.0257	5.3704	6.0257	4.2659	4.7864	4.2659	6.0257
Sub8	2016-04-17	47	3	0.29	90	ul	6.38	3.3885	5.3704	4.2659	7.5859	6.0257	6.7609	6.0257	6.7609	6.0257	6.7609
Sub8	2016-04-17	47	3	0.29	90	ul	4.43	2.138	2.6916	2.138	6.0257	3.802	4.2659	3.802	4.7864	4.2659	6.0257
Sub8	2016-04-17	47	3	0.29	90	ul	4.97	3.3885	4.2659	3.02	4.2659	3.802	6.0257	5.3704	6.0257	4.2659	4.7864
Sub8	2016-04-18	47	3	0.29	90	ul	11.57	8.5115	13.4898	7.5859	8.5115	7.5859	15.1358	12.0228	13.4898	10.7154	12.0228
Sub8	2016-04-18	47	3	0.29	90	ul	6.26	8.5115	10.7154	5.3704	6.7609	5.3704	6.7609	6.0257	6.7609	5.3704	7.5859
Sub8	2016-04-18	47	3	0.29	90	ul	4.27	6.7609	8.5115	5.3704	6.0257	3.3885	4.2659	3.802	4.7864	4.2659	5.3704
Sub8	2016-04-18	47	3	0.29	90	ul	6.14	6.7609	8.5115	6.7609	7.5859	6.0257	6.7609	6.0257	6.7609	4.7864	6.7609
Sub8	2016-04-18	47	3	0.29	90	ul	4.18	2.138	2.6916	2.138	3.802	3.3885	4.7864	3.02	4.2659	3.802	6.7609
Sub8	2016-04-18	47	3	0.29	90	ul	6.89	16.9827	4.2659	6.0257	3.802	5.3704	4.7864	7.5859	6.7609	10.7154	7.5859
Sub8	2016-04-18	47	3	0.29	90	ul	7.16	8.5115	10.7154	6.7609	7.5859	6.7609	7.5859	6.7609	7.5859	6.7609	7.5859
Sub8	2016-04-18	47	3	0.29	90	ul	4.7	6.7609	8.5115	4.7864	5.3704	4.7864	6.0257	3.02	4.7864	4.2659	6.0257
Sub8	2016-04-18	47	3	0.29	90	ul	7.88	8.5115	10.7154	7.5859	8.5115	7.5859	9.5501	7.5859	8.5115	6.7609	7.5859
Sub8	2016-04-18	47	3	0.29	90	ul	5.27	13.4898	5.3704	7.5859	5.3704	6.7609	4.7864	5.3704	4.7864	5.3704	4.7864
Sub8	2016-04-18	47	3	0.29	90	ul	4.88	8.5115	10.7154	7.5859	8.5115	5.3704	6.0257	4.2659	6.0257	3.802	4.2659
Sub8	2016-04-18	47	3	0.29	90	ul	8.84	8.5115	10.7154	8.5115	10.7154	7.5859	9.5501	8.5115	9.5501	8.5115	9.5501
Sub8	2016-04-18	47	3	0.29	90	ul	6.14	4.2659	6.7609	4.7864	7.5859	5.3704	6.0257	5.3704	7.5859	4.7864	8.5115
Sub8	2016-04-18	47	3	0.29	90	ul	7.59	5.3704	8.5115	3.802	6.0257	5.3704	8.5115	7.5859	8.5115	6.7609	9.5501
Sub8	2016-04-18	47	3	0.29	90	ul	5.27	8.5115	10.7154	6.7609	7.5859	4.7864	6.7609	4.7864	5.3704	4.7864	5.3704
Sub8	2016-04-20	47	3	0.29	90	ul	5.8	8.5115	10.7154	7.5859	8.5115	6.0257	6.7609	5.3704	6.7609	4.7864	5.3704
Sub8	2016-04-20	47	3	0.29	90	ul	6.89	8.5115	10.7154	6.7609	7.5859	6.7609	7.5859	6.7609	7.5859	5.3704	7.5859
Sub8	2016-04-20	47	3	0.29	90	ul	4.7	8.5115	10.7154	5.3704	7.5859	6.0257	6.7609	4.7864	5.3704	3.02	3.3885
Sub8	2016-04-20	47	3	0.29	90	ul	4.18	8.5115	10.7154	4.7864	6.0257	4.7864	5.3704	3.02	4.7864	3.3885	4.2659
Sub8	2016-04-20	47	3	0.29	90	ul	3.73	8.5115	10.7154	6.0257	6.7609	3.3885	4.2659	3.3885	3.802	3.3885	4.2659
Sub8	2016-04-20	47	3	0.29	90	ul	6.51	5.3704	8.5115	6.7609	7.5859	6.7609	7.5859	6.7609	8.5115	4.7864	5.3704
Sub8	2016-04-20	47	3	0.29	90	ul	5.91	6.7609	8.5115	6.0257	6.7609	6.0257	6.7609	5.3704	6.0257	5.3704	6.0257
Sub8	2016-04-20	47	3	0.29	90	ul	5.58	13.4898	8.5115	10.7154	5.3704	6.0257	5.3704	6.0257	5.3704	6.0257	4.7864
Sub8	2016-04-20	47	3	0.29	90	ul	6.26	5.3704	6.7609	5.3704	6.0257	5.3704	6.0257	4.7864	7.5859	6.7609	7.5859
Sub8	2016-04-20	47	3	0.29	90	ul	5.58	5.3704	8.5115	3.802	6.0257	5.3704	6.0257	5.3704	6.0257	4.7864	6.0257
Sub8	2016-04-20	47	3	0.29	90	ul	4.03	5.3704	8.5115	4.7864	5.3704	4.2659	4.7864	3.802	4.2659	3.3885	3.802
Sub8	2016-04-20	47	3	0.29	90	ul	4.52	3.3885	8.5115	6.7609	7.5859	5.3704	6.0257	3.802	4.2659	3.802	4.2659
Sub8	2016-04-20	47	3	0.29	90	ul	6.38	8.5115	10.7154	8.5115	9.5501	7.5859	8.5115	6.0257	6.7609	4.2659	6.0257
Sub8	2016-04-20	47	3	0.29	90	ul	4.18	6.7609	8.5115	6.0257	7.5859	4.7864	5.3704	3.3885	3.802	3.02	5.3704
Sub8	2016-04-21	47	3	0.29	90	ul	3.59	3.3885	5.3704	3.3885	5.3704	3.3885	3.802	3.3885	3.802	3.3885	3.802
Sub8	2016-04-21	47	3	0.29	90	ul	7.88	13.4898	6.7609	8.5115	7.5859	8.5115	7.5859	8.5115	7.5859	8.5115	6.7609
Sub8	2016-04-21	47	3	0.29	90	ul	4.18	8.5115	10.7154	4.7864	5.3704	3.3885	4.2659	3.802	4.7864	3.802	5.3704
Sub8	2016-04-21	47	3	0.29	90	ul	3.32	3.3885	5.3704	4.2659	5.3704	3.3885	3.802	3.02	3.3885	3.02	3.3885
Sub8	2016-04-21	47	3	0.29	90	ul	5.69	8.5115	10.7154	6.0257	6.7609	4.2659	5.3704	3.802	7.5859	6.7609	7.5859
Sub8	2016-04-21	47	3	0.29	90	ul	2.91	8.5115	10.7154	3.02	3.802	3.3885	4.2659	2.3989	2.6916	2.3989	2.6916
Sub8	2016-04-21	47	3	0.29	90	ul	4.35	5.3704	6.7609	4.7864	5.3704	4.7864	5.3704	3.802	4.7864	3.3885	4.2659
Sub8	2016-04-21	47	3	0.29	90	ul	4.79	4.2659	8.5115	4.7864	5.3704	4.7864	6.0257	3.802	4.7864	4.2659	5.3704
Sub8	2016-04-21	47	3	0.29	90	ul	3.95	6.7609	8.5115	3.802	4.2659	3.802	4.2659	3.3885	3.802	3.3885	5.3704
Sub8	2016-04-21	47	3	0.29	90	ul	6.26	6.7609	8.5115	4.7864	6.7609	6.0257	7.5859	6.0257	6.7609	5.3704	6.0257
Sub8	2016-04-21	47	3	0.29	90	ul	6.89	5.3704	6.7609	5.3704	8.5115	7.5859	8.5115	6.0257	6.7609	6.0257	6.7609
Sub8	2016-04-21	47	3	0.29	90	ul	7.03	4.2659	6.7609	5.3704	6.7609	6.0257	7.5859	6.7609	7.5859	6.7609	7.5859
Sub8	2016-04-21	47	3	0.29	90	ul	5.37	5.3704	6.7609	5.3704	6.0257	4.7864	5.3704	4.7864	6.0257	5.3704	6.0257
Sub8	2016-04-21	47	3	0.29	90	ul	6.38	8.5115	10.7154	5.3704	6.7609	6.0257	6.7609	6.0257	7.5859	5.3704	6.7609
Sub8	2016-04-21	47	3	0.29	90	ul	4.97	8.5115	13.4898	8.5115	9.5501	4.2659	4.7864	3.3885	6.0257	5.3704	6.7609
Sub8	2016-04-22	47	3	0.29	90	ul	6.76	5.3704	6.7609	5.3704	6.7609	5.3704	7.5859	6.7609	7.5859	6.0257	7.5859
Sub8	2016-04-22	47	3	0.29	90	ul	6.38	6.7609	8.5115	6.0257	7.5859	6.7609	7.5859	5.3704	6.0257	5.3704	7.5859
Sub8	2016-04-22	47	3	0.29	90	ul	6.38	8.5115	10.7154	6.0257	6.7609	6.0257	6.7609	6.0257	6.7609	6.0257	6.7609
Sub8	2016-04-22	47	3	0.29	90	ul	4.79	8.5115	10.7154	5.3704	6.7609	3.802	4.7864	4.2659	6.0257	4.7864	5.3704
Sub8	2016-04-22	47	3	0.29	90	ul	6.63	3.3885	5.3704	4.2659	6.0257	5.3704	6.7609	6.0257	7.5859	6.0257	8.5115
Sub8	2016-04-22	47	3	0.29	90	ul	4.7	6.7609	8.5115	5.3704	6.7609	6.0257	6.7609	2.6916	4.7864	4.2659	4.7864
Sub8	2016-04-22	47	3	0.29	90	ul	5.17	8.5115	13.4898	4.2659	4.7864	4.2659	4.7864	4.2659	6.0257	5.3704	6.7609
Sub8	2016-04-22	47	3	0.29	90	ul	3.88	13.4898	4.2659	6.0257	5.3704	6.0257	3.02	4.2659	3.3885	3.802	3.3885
Sub8	2016-04-22	47	3	0.29	90	ul	6.26	6.7609	8.5115	6.7609	7.5859	6.0257	6.7609	5.3704	6.0257	5.3704	8.5115
Sub8	2016-04-22	47	3	0.29	90	ul	7.73	6.7609	8.5115	6.0257	7.5859	6.0257	10.7154	7.5859	8.5115	6.0257	8.5115
Sub8	2016-04-22	47	3	0.29	90	ul	7.16	16.9827	4.2659	5.3704	4.7864	6.7609	6.0257	6.7609	6.0257	12.0228	6.7609
Sub8	2016-04-22	47	3	0.29	90	ul	6.89	8.5115	10.7154	5.3704	6.0257	4.7864	6.7609	6.0257	8.5115	7.5859	8.5115
Sub8	2016-04-22	47	3	0.29	90	ul	4.43	4.2659	5.3704	3.802	4.7864	3.802	4.7864	4.2659	4.7864	4.2659	4.7864
Sub8	2016-04-22	47	3	0.29	90	ul	6.03	6.7609	8.5115	5.3704	6.0257	4.7864	6.0257	5.3704	6.7609	6.0257	7.5859
Sub8	2016-04-22	47	3	0.29	90	ul	5.07	8.5115	10.7154	6.0257	6.7609	6.0257	6.7609	4.7864	5.3704	3.02	5.3704
Sub8	2016-04-23	47	3	0.29	90	ul	5.27	4.2659	5.3704	4.2659	6.0257	3.802	4.7864	4.2659	6.7609	6.0257	6.7609
Sub8	2016-04-23	47	3	0.29	90	ul	5.58	8.5115	10.7154	6.0257	6.7609	4.2659	6.0257	5.3704	6.7609	5.3704	6.0257
Sub8	2016-04-23	47	3	0.29	90	ul	5.17	13.4898	6.7609	8.5115	5.3704	6.0257	4.7864	5.3704	4.7864	5.3704	4.7864
Sub8	2016-04-23	47	3	0.29	90	ul	4.79	2.6916	5.3704	4.2659	5.3704	3.802	4.7864	4.2659	4.7864	4.2659	7.5859
Sub8	2016-04-23	47	3	0.29	90	ul	5.47	4.2659	6.7609	3.802	5.3704	4.7864	5.3704	4.7864	6.0257	5.3704	6.7609
Sub8	2016-04-23	47	3	0.29	90	ul	6.63	5.3704	6.7609	4.7864	7.5859	6.7609	7.5859	6.0257	6.7609	6.0257	6.7609
Sub8	2016-04-23	47	3	0.29	90	dr	6.38	5.3704	8.5115	5.3704	6.7609	6.0257	6.7609	6.0257	6.7609	5.3704	7.5859
Sub8	2016-04-23	47	3	0.29	90	dr	7.16	13.4898	5.3704	6.7609	6.0257	7.5859	6.7609	7.5859	6.7609	7.5859	6.7609
Sub8	2016-04-23	47	3	0.29	90	dr	3.08	2.6916	3.3885	2.6916	3.02	2.6916	3.3885	2.6916	3.02	2.6916	4.2659
Sub8	2016-04-23	47	3	0.29	90	dr	4.11	4.2659	5.3704	4.2659	4.7864	4.2659	4.7864	3.802	4.2659	3.3885	4.2659
Sub8	2016-04-23	47	3	0.29	90	dr	6.03	4.2659	5.3704	4.2659	6.0257	5.3704	6.7609	6.0257	6.7609	5.3704	6.0257
Sub8	2016-04-23	47	3	0.29	90	dr	3.73	2.138	4.2659	2.3989	3.3885	3.02	3.802	3.02	3.802	3.3885	6.0257

## Sheet: Raw_Fig4c
ID	date	contrast	spatial frequency (c/d)	standard deviation (deg)	orientation (deg)	Location	threshold	preliminary reversals				experimental reversals
Sub1	2016-04-14	47	3	0.29	90	ul	5.17	8.5115	10.7154	6.7609	7.5859	4.2659	6.0257	5.3704	6.0257	4.2659	5.3704
Sub1	2016-04-14	47	3	0.29	90	ul	6.76	8.5115	10.7154	8.5115	9.5501	7.5859	8.5115	6.7609	7.5859	4.7864	6.0257
Sub1	2016-04-14	47	3	0.29	90	ul	5.69	6.7609	8.5115	6.7609	7.5859	4.7864	5.3704	4.7864	6.7609	6.0257	6.7609
Sub1	2016-04-14	47	3	0.29	90	ul	4.27	6.7609	8.5115	6.0257	6.7609	5.3704	6.7609	3.3885	3.802	3.3885	3.802
Sub1	2016-04-14	47	3	0.29	90	ul	6.26	13.4898	6.7609	8.5115	6.0257	6.7609	4.7864	7.5859	6.0257	6.7609	6.0257
Sub1	2016-04-14	47	3	0.29	90	ul	4.52	13.4898	3.3885	4.7864	4.2659	4.7864	4.2659	4.7864	4.2659	4.7864	4.2659
Sub1	2016-04-20	47	3	0.29	90	ul	9.55	13.4898	5.3704	8.5115	7.5859	9.5501	8.5115	12.0228	8.5115	10.7154	8.5115
Sub1	2016-04-20	47	3	0.29	90	ul	6.89	6.7609	13.4898	8.5115	10.7154	7.5859	8.5115	6.7609	7.5859	5.3704	6.0257
Sub1	2016-04-20	47	3	0.29	90	ul	6.14	6.7609	8.5115	6.0257	9.5501	6.7609	7.5859	5.3704	6.7609	4.7864	6.0257
Sub1	2016-04-20	47	3	0.29	90	ul	7.44	6.7609	10.7154	6.7609	8.5115	6.7609	7.5859	5.3704	9.5501	7.5859	8.5115
Sub1	2016-04-20	47	3	0.29	90	ul	8.51	16.9827	10.7154	15.1358	12.0228	13.4898	7.5859	9.5501	7.5859	8.5115	6.0257
Sub2	2016-04-14	47	3	0.29	90	dr	7.59	8.5115	10.7154	5.3704	6.0257	5.3704	8.5115	7.5859	8.5115	7.5859	8.5115
Sub2	2016-04-14	47	3	0.29	90	dr	7.03	5.3704	6.7609	5.3704	7.5859	6.7609	7.5859	6.7609	7.5859	6.0257	7.5859
Sub2	2016-04-14	47	3	0.29	90	dr	6.63	5.3704	10.7154	7.5859	8.5115	6.0257	7.5859	6.0257	6.7609	6.0257	7.5859
Sub2	2016-04-14	47	3	0.29	90	dr	7.16	6.7609	8.5115	6.0257	6.7609	6.0257	7.5859	6.7609	8.5115	6.7609	7.5859
Sub2	2016-04-14	47	3	0.29	90	dr	5.58	3.3885	6.7609	5.3704	6.0257	4.7864	6.0257	5.3704	6.0257	5.3704	6.0257
Sub2	2016-04-14	47	3	0.29	90	dr	5.8	6.7609	8.5115	6.7609	8.5115	7.5859	8.5115	4.2659	5.3704	4.2659	6.0257
Sub2	2016-04-19	47	3	0.29	90	dr	7.73	6.7609	8.5115	5.3704	6.0257	5.3704	8.5115	7.5859	9.5501	7.5859	8.5115
Sub2	2016-04-19	47	3	0.29	90	dr	7.73	6.7609	8.5115	6.7609	7.5859	6.7609	7.5859	6.7609	8.5115	7.5859	9.5501
Sub2	2016-04-19	47	3	0.29	90	dr	6.03	8.5115	10.7154	6.7609	7.5859	6.0257	6.7609	5.3704	6.0257	5.3704	6.7609
Sub2	2016-04-19	47	3	0.29	90	dr	4.7	3.3885	5.3704	3.802	4.2659	3.802	6.7609	5.3704	6.7609	3.02	3.802
Sub2	2016-04-19	47	3	0.29	90	dr	3.73	13.4898	1.6983	4.2659	3.802	4.7864	3.802	4.2659	3.3885	3.802	2.6916
Sub2	2016-04-19	47	3	0.29	90	dr	4.43	6.7609	8.5115	6.0257	6.7609	3.802	4.7864	4.2659	6.0257	3.802	4.2659
Sub3	2016-04-14	47	3	0.29	90	dr	5.69	6.7609	8.5115	6.7609	7.5859	4.7864	5.3704	4.7864	6.7609	6.0257	6.7609
Sub3	2016-04-14	47	3	0.29	90	dr	5.58	4.2659	6.7609	5.3704	6.0257	5.3704	6.0257	5.3704	6.0257	4.7864	6.0257
Sub3	2016-04-14	47	3	0.29	90	dr	3.59	13.4898	3.3885	4.7864	2.6916	3.02	2.6916	3.802	3.3885	4.7864	4.2659
Sub3	2016-04-14	47	3	0.29	90	dr	3.73	3.3885	4.2659	3.3885	3.802	3.02	3.802	3.3885	4.2659	3.802	4.2659
Sub3	2016-04-14	47	3	0.29	90	dr	3.39	2.6916	4.2659	2.6916	3.802	3.3885	4.2659	3.02	3.3885	3.02	3.3885
Sub3	2016-04-14	47	3	0.29	90	dr	4.35	4.2659	6.7609	4.2659	4.7864	4.2659	5.3704	3.802	4.7864	3.802	4.2659
Sub3	2016-04-19	47	3	0.29	90	dr	5.69	5.3704	8.5115	6.7609	7.5859	6.7609	7.5859	6.0257	6.7609	3.802	4.2659
Sub3	2016-04-19	47	3	0.29	90	dr	3.73	3.3885	4.2659	3.3885	3.802	3.3885	3.802	3.3885	4.2659	3.3885	4.2659
Sub3	2016-04-19	47	3	0.29	90	dr	5.27	8.5115	10.7154	8.5115	9.5501	5.3704	6.0257	4.7864	5.3704	4.7864	5.3704
Sub3	2016-04-19	47	3	0.29	90	dr	3.95	3.3885	5.3704	4.2659	4.7864	3.802	4.7864	3.802	4.2659	3.3885	3.802
Sub3	2016-04-19	47	3	0.29	90	dr	3.39	3.3885	5.3704	3.02	3.802	3.02	3.3885	3.02	3.802	3.3885	3.802
Sub4	2016-04-14	47	3	0.29	90	dr	9.37	8.5115	10.7154	8.5115	9.5501	7.5859	8.5115	7.5859	10.7154	9.5501	13.4898
Sub4	2016-04-14	47	3	0.29	90	dr	10.12	8.5115	13.4898	8.5115	10.7154	7.5859	9.5501	8.5115	12.0228	10.7154	13.4898
Sub4	2016-04-14	47	3	0.29	90	dr	7.59	8.5115	13.4898	7.5859	8.5115	7.5859	8.5115	6.7609	7.5859	6.7609	8.5115
Sub4	2016-04-14	47	3	0.29	90	dr	5.91	16.9827	6.7609	8.5115	6.7609	7.5859	4.7864	6.0257	4.7864	6.7609	6.0257
Sub4	2016-04-14	47	3	0.29	90	dr	6.89	8.5115	10.7154	7.5859	8.5115	7.5859	8.5115	7.5859	9.5501	4.2659	5.3704
Sub4	2016-04-14	47	3	0.29	90	dr	4.43	2.6916	3.3885	2.6916	3.02	2.6916	5.3704	4.2659	6.7609	3.802	4.7864
Sub4	2016-04-19	47	3	0.29	90	dr	5.47	3.3885	4.2659	3.3885	4.7864	3.802	5.3704	4.7864	6.7609	6.0257	6.7609
Sub4	2016-04-19	47	3	0.29	90	dr	6.51	4.2659	10.7154	6.7609	7.5859	6.7609	7.5859	6.0257	6.7609	5.3704	6.7609
Sub4	2016-04-19	47	3	0.29	90	dr	5.27	13.4898	4.2659	5.3704	4.7864	6.7609	4.7864	5.3704	4.7864	5.3704	4.7864
Sub4	2016-04-19	47	3	0.29	90	dr	5.58	4.2659	5.3704	3.802	6.7609	5.3704	6.0257	4.7864	6.0257	4.7864	6.7609
Sub4	2016-04-19	47	3	0.29	90	dr	5.07	2.138	4.2659	3.3885	5.3704	3.802	6.0257	4.2659	6.7609	4.7864	5.3704
Sub5	2016-04-14	47	3	0.29	90	dr	3.66	8.5115	13.4898	3.3885	3.802	3.02	3.802	3.02	4.2659	3.802	4.2659
Sub5	2016-04-14	47	3	0.29	90	dr	7.73	5.3704	6.7609	5.3704	8.5115	7.5859	8.5115	6.7609	8.5115	6.7609	8.5115
Sub5	2016-04-14	47	3	0.29	90	dr	5.91	13.4898	10.7154	13.4898	6.0257	6.7609	6.0257	6.7609	4.7864	6.0257	5.3704
Sub5	2016-04-14	47	3	0.29	90	dr	9.02	8.5115	10.7154	8.5115	12.0228	10.7154	12.0228	8.5115	9.5501	6.7609	7.5859
Sub5	2016-04-14	47	3	0.29	90	dr	7.88	6.7609	8.5115	6.7609	8.5115	6.7609	7.5859	6.7609	10.7154	7.5859	8.5115
Sub5	2016-04-14	47	3	0.29	90	dr	4.79	8.5115	10.7154	4.7864	5.3704	4.2659	6.0257	3.802	4.7864	4.2659	6.0257
Sub5	2016-04-14	47	3	0.29	90	dr	4.61	5.3704	6.7609	5.3704	6.0257	5.3704	6.0257	3.802	4.2659	3.802	4.7864
Sub5	2016-04-19	47	3	0.29	90	dr	7.44	8.5115	10.7154	8.5115	9.5501	7.5859	8.5115	6.7609	7.5859	6.7609	7.5859
Sub5	2016-04-19	47	3	0.29	90	dr	7.73	8.5115	16.9827	10.7154	12.0228	7.5859	8.5115	7.5859	8.5115	6.7609	7.5859
Sub5	2016-04-19	47	3	0.29	90	dr	3.52	6.7609	8.5115	3.802	6.7609	4.2659	4.7864	2.138	3.802	3.02	3.802
Sub5	2016-04-19	47	3	0.29	90	dr	7.88	8.5115	13.4898	8.5115	10.7154	8.5115	9.5501	7.5859	8.5115	6.0257	7.5859
Sub5	2016-04-19	47	3	0.29	90	dr	3.39	6.7609	8.5115	3.02	3.3885	3.02	3.3885	2.6916	4.2659	3.3885	3.802
Sub6	2016-04-15	47	3	0.29	90	dr	9.19	13.4898	10.7154	13.4898	9.5501	12.0228	9.5501	10.7154	7.5859	8.5115	7.5859
Sub6	2016-04-15	47	3	0.29	90	dr	6.89	6.7609	10.7154	7.5859	8.5115	7.5859	8.5115	6.0257	6.7609	6.0257	6.7609
Sub6	2016-04-15	47	3	0.29	90	dr	6.89	8.5115	16.9827	10.7154	12.0228	8.5115	9.5501	6.0257	6.7609	5.3704	6.0257
Sub6	2016-04-15	47	3	0.29	90	dr	6.63	16.9827	10.7154	13.4898	7.5859	8.5115	6.0257	6.7609	6.0257	6.7609	6.0257
Sub6	2016-04-15	47	3	0.29	90	dr	2.74	2.6916	3.3885	2.138	3.802	3.02	4.2659	2.3989	2.6916	2.138	2.3989
Sub6	2016-04-15	47	3	0.29	90	dr	7.16	13.4898	8.5115	10.7154	9.5501	10.7154	6.0257	8.5115	6.7609	7.5859	4.7864
Sub6	2016-04-20	47	3	0.29	90	dr	6.26	2.6916	8.5115	6.0257	7.5859	6.0257	6.7609	6.0257	6.7609	5.3704	6.7609
Sub6	2016-04-20	47	3	0.29	90	dr	5.07	8.5115	10.7154	7.5859	8.5115	4.7864	5.3704	4.2659	5.3704	4.7864	6.0257
Sub6	2016-04-20	47	3	0.29	90	dr	6.26	8.5115	10.7154	7.5859	8.5115	4.7864	6.7609	6.0257	7.5859	6.0257	6.7609
Sub6	2016-04-20	47	3	0.29	90	dr	5.27	6.7609	8.5115	6.0257	6.7609	6.0257	6.7609	4.2659	4.7864	4.2659	6.0257
Sub6	2016-04-20	47	3	0.29	90	dr	4.43	4.2659	5.3704	4.2659	5.3704	4.2659	4.7864	3.3885	4.2659	3.802	6.7609
Sub7	2016-04-19	47	3	0.29	90	ul	4.52	4.7864	6.0257	4.7864	6.0257	4.2659	6.0257	4.7864	5.3704	3.3885	3.802
Sub7	2016-04-19	47	3	0.29	90	ul	3.02	3.802	4.7864	3.3885	3.802	2.6916	3.802	3.02	3.802	2.3989	2.6916
Sub7	2016-04-19	47	3	0.29	90	ul	4.11	3.02	3.802	2.6916	4.2659	3.3885	4.2659	2.3989	6.0257	4.2659	5.3704
Sub7	2016-04-19	47	3	0.29	90	ul	5.91	4.7864	7.5859	5.3704	6.0257	5.3704	6.7609	4.2659	6.7609	6.0257	6.7609
Sub7	2016-04-19	47	3	0.29	90	ul	4.18	4.7864	6.0257	4.7864	5.3704	4.2659	4.7864	3.802	4.2659	3.802	4.2659
Sub7	2016-04-19	47	3	0.29	90	ul	4.52	4.7864	9.5501	3.802	4.2659	3.3885	5.3704	4.2659	5.3704	3.802	5.3704
Sub7	2016-04-25	47	3	0.29	90	ul	6.63	9.5501	7.5859	9.5501	8.5115	9.5501	5.3704	6.7609	6.0257	6.7609	6.0257
Sub7	2016-04-25	47	3	0.29	90	ul	4.7	3.802	6.0257	3.802	5.3704	4.7864	5.3704	4.2659	4.7864	4.2659	4.7864
Sub7	2016-04-25	47	3	0.29	90	ul	5.07	9.5501	4.7864	6.7609	5.3704	6.0257	4.2659	6.0257	4.2659	5.3704	4.7864
Sub7	2016-04-25	47	3	0.29	90	ul	7.73	15.1358	7.5859	9.5501	6.7609	8.5115	6.7609	8.5115	6.7609	9.5501	6.7609
Sub7	2016-04-25	47	3	0.29	90	ul	3.26	3.802	4.7864	3.802	4.2659	3.02	3.802	3.02	3.3885	3.02	3.3885
Sub8	2016-04-20	47	3	0.29	90	ul	4.97	12.0228	6.0257	7.5859	6.0257	6.7609	4.7864	5.3704	4.7864	5.3704	3.3885
Sub8	2016-04-20	47	3	0.29	90	ul	5.27	7.5859	9.5501	5.3704	7.5859	5.3704	6.0257	4.7864	5.3704	4.7864	5.3704
Sub8	2016-04-20	47	3	0.29	90	ul	4.7	7.5859	9.5501	6.7609	7.5859	6.7609	7.5859	6.0257	6.7609	2.138	2.3989
Sub8	2016-04-20	47	3	0.29	90	ul	3.66	6.0257	7.5859	6.0257	6.7609	4.2659	4.7864	3.02	3.3885	3.02	3.802
Sub8	2016-04-20	47	3	0.29	90	ul	4.97	7.5859	9.5501	7.5859	8.5115	6.7609	7.5859	4.2659	4.7864	3.3885	4.2659
Sub8	2016-04-20	47	3	0.29	90	ul	2.64	4.7864	6.0257	2.6916	3.02	2.3989	2.6916	2.3989	2.6916	1.9055	4.2659
Sub8	2016-04-26	47	3	0.29	90	ul	2.85	4.7864	6.0257	3.802	4.7864	3.3885	3.802	2.3989	2.6916	2.3989	2.6916
Sub8	2016-04-26	47	3	0.29	90	ul	2.85	6.0257	7.5859	3.3885	3.802	3.02	3.3885	2.6916	3.02	2.3989	2.6916
Sub8	2016-04-26	47	3	0.29	90	ul	1.6	1.2023	1.9055	1.5136	1.6983	1.2023	1.9055	1.349	1.9055	1.5136	1.9055
Sub8	2016-04-26	47	3	0.29	90	ul	1.94	2.3989	3.02	1.6983	1.9055	1.6983	2.138	1.5136	2.138	1.9055	2.3989
Sub8	2016-04-26	47	3	0.29	90	ul	4.18	4.7864	6.0257	4.2659	4.7864	4.2659	4.7864	3.802	4.2659	3.802	4.2659

## Sheet: Raw_Fig4d
ID	date	contrast	spatial frequency (c/d)	standard deviation (deg)	orientation (deg)	Location	threshold	preliminary reversals				experimental reversals
Sub1	2014-07-30	47	3	0.29	90	dr	5.91	5.3704	6.7609	5.3704	6.0257	4.7864	6.0257	5.3704	6.7609	6.0257	6.7609
Sub1	2014-07-30	47	3	0.29	90	dr	11.13	6.7609	13.4898	8.5115	10.7154	9.5501	12.0228	10.7154	12.0228	10.7154	12.0228
Sub1	2014-07-30	47	3	0.29	90	dr	6.38	13.4898	6.7609	8.5115	6.7609	7.5859	5.3704	6.7609	6.0257	6.7609	6.0257
Sub1	2014-07-30	47	3	0.29	90	dr	11.35	6.7609	8.5115	4.7864	6.7609	4.7864	8.5115	7.5859	21.38	16.9827	19.0549
Sub1	2014-07-30	47	3	0.29	90	dr	6.76	5.3704	6.7609	3.3885	4.7864	4.2659	4.7864	4.2659	10.7154	9.5501	10.7154
Sub1	2014-07-30	47	3	0.29	90	dr	7.03	4.2659	5.3704	4.2659	6.0257	5.3704	8.5115	7.5859	8.5115	6.0257	6.7609
Sub1	2014-07-30	47	3	0.29	90	ul	6.63	21.38	8.5115	13.4898	9.5501	12.0228	5.3704	6.0257	5.3704	6.7609	6.0257
Sub1	2014-07-30	47	3	0.29	90	ul	10.31	8.5115	10.7154	6.0257	10.7154	8.5115	9.5501	8.5115	12.0228	10.7154	13.4898
Sub1	2014-07-30	47	3	0.29	90	ul	8.19	16.9827	6.7609	8.5115	6.7609	8.5115	7.5859	9.5501	7.5859	8.5115	7.5859
Sub1	2014-07-30	47	3	0.29	90	ul	10.51	8.5115	10.7154	8.5115	12.0228	9.5501	13.4898	9.5501	10.7154	9.5501	10.7154
Sub1	2014-07-30	47	3	0.29	90	ul	10.51	6.7609	13.4898	10.7154	13.4898	9.5501	15.1358	7.5859	12.0228	9.5501	10.7154
Sub1	2014-07-31	47	3	0.29	90	dr	7.59	16.9827	8.5115	10.7154	7.5859	9.5501	6.7609	7.5859	6.7609	8.5115	6.7609
Sub1	2014-07-31	47	3	0.29	90	dr	8.19	8.5115	10.7154	6.7609	8.5115	6.7609	8.5115	6.7609	9.5501	8.5115	9.5501
Sub1	2014-07-31	47	3	0.29	90	dr	7.16	5.3704	10.7154	6.7609	8.5115	6.0257	6.7609	6.0257	8.5115	7.5859	8.5115
Sub1	2014-07-31	47	3	0.29	90	dr	7.73	6.7609	10.7154	6.0257	6.7609	5.3704	7.5859	6.7609	8.5115	7.5859	12.0228
Sub1	2014-07-31	47	3	0.29	90	dr	6.26	4.2659	5.3704	4.2659	6.0257	5.3704	6.0257	5.3704	8.5115	6.0257	6.7609
Sub1	2014-07-31	47	3	0.29	90	dr	6.26	6.7609	8.5115	6.0257	6.7609	6.0257	6.7609	6.0257	6.7609	5.3704	6.7609
Sub1	2014-07-31	47	3	0.29	90	dr	6.51	6.7609	10.7154	6.7609	8.5115	6.0257	7.5859	6.0257	6.7609	5.3704	7.5859
Sub1	2014-07-31	47	3	0.29	90	dr	7.73	5.3704	6.7609	5.3704	10.7154	8.5115	9.5501	6.7609	7.5859	6.7609	7.5859
Sub1	2014-07-31	47	3	0.29	90	dr	5.07	8.5115	10.7154	4.2659	5.3704	4.7864	6.0257	4.2659	5.3704	4.2659	6.0257
Sub1	2014-07-31	47	3	0.29	90	dr	5.17	5.3704	6.7609	4.7864	6.7609	5.3704	6.0257	4.2659	5.3704	4.7864	5.3704
Sub1	2014-07-31	47	3	0.29	90	dr	6.51	5.3704	6.7609	4.7864	6.0257	5.3704	6.0257	4.7864	7.5859	6.7609	9.5501
Sub1	2014-07-31	47	3	0.29	90	dr	6.26	6.7609	8.5115	4.2659	6.0257	5.3704	6.7609	6.0257	8.5115	5.3704	6.0257
Sub1	2014-07-31	47	3	0.29	90	dr	10.31	5.3704	8.5115	6.7609	9.5501	8.5115	12.0228	9.5501	12.0228	8.5115	12.0228
Sub1	2014-07-31	47	3	0.29	90	dr	5.8	8.5115	10.7154	7.5859	8.5115	4.7864	5.3704	4.7864	6.0257	5.3704	9.5501
Sub1	2014-07-31	47	3	0.29	90	dr	8.19	5.3704	13.4898	10.7154	12.0228	7.5859	8.5115	7.5859	8.5115	7.5859	9.5501
Sub1	2014-07-31	47	3	0.29	90	dr	6.26	8.5115	10.7154	7.5859	8.5115	6.7609	7.5859	6.7609	7.5859	4.2659	5.3704
Sub1	2014-08-01	47	3	0.29	90	dr	10.51	6.7609	8.5115	6.7609	8.5115	6.7609	15.1358	10.7154	12.0228	9.5501	10.7154
Sub1	2014-08-01	47	3	0.29	90	dr	9.37	13.4898	6.7609	8.5115	6.7609	10.7154	9.5501	10.7154	8.5115	9.5501	7.5859
Sub1	2014-08-01	47	3	0.29	90	dr	10.51	13.4898	10.7154	13.4898	10.7154	12.0228	10.7154	13.4898	9.5501	10.7154	7.5859
Sub1	2014-08-01	47	3	0.29	90	dr	5.58	6.7609	8.5115	6.7609	7.5859	5.3704	6.7609	6.0257	6.7609	4.2659	4.7864
Sub1	2014-08-01	47	3	0.29	90	dr	8.51	5.3704	10.7154	7.5859	9.5501	7.5859	8.5115	7.5859	9.5501	8.5115	9.5501
Sub1	2014-08-01	47	3	0.29	90	dr	6.76	4.2659	8.5115	4.2659	6.7609	6.0257	7.5859	5.3704	9.5501	6.0257	6.7609
Sub1	2014-08-01	47	3	0.29	90	dr	8.51	6.7609	10.7154	8.5115	9.5501	8.5115	9.5501	7.5859	8.5115	7.5859	9.5501
Sub1	2014-08-01	47	3	0.29	90	dr	4.88	5.3704	6.7609	4.7864	6.0257	4.2659	4.7864	4.2659	4.7864	4.2659	7.5859
Sub1	2014-08-01	47	3	0.29	90	dr	7.03	6.7609	10.7154	8.5115	23.9887	6.7609	9.5501	4.7864	7.5859	6.0257	8.5115
Sub1	2014-08-01	47	3	0.29	90	dr	5.8	6.7609	8.5115	5.3704	9.5501	6.0257	6.7609	6.0257	7.5859	4.2659	4.7864
Sub1	2014-08-01	47	3	0.29	90	dr	5.07	4.2659	8.5115	3.802	4.2659	3.3885	7.5859	4.2659	5.3704	4.7864	6.0257
Sub1	2014-08-01	47	3	0.29	90	dr	8.19	13.4898	8.5115	10.7154	8.5115	12.0228	7.5859	9.5501	6.7609	7.5859	6.7609
Sub1	2014-08-01	47	3	0.29	90	dr	5.58	4.2659	5.3704	3.02	5.3704	4.7864	6.0257	5.3704	6.7609	4.7864	6.0257
Sub1	2014-08-01	47	3	0.29	90	dr	6.51	5.3704	6.7609	4.2659	6.0257	5.3704	6.7609	6.0257	6.7609	6.0257	8.5115
Sub1	2014-08-01	47	3	0.29	90	dr	9.55	13.4898	5.3704	8.5115	6.7609	12.0228	9.5501	10.7154	7.5859	10.7154	7.5859
Sub1	2014-08-02	47	3	0.29	90	dr	9.37	6.7609	8.5115	4.7864	6.7609	6.0257	7.5859	6.7609	13.4898	12.0228	13.4898
Sub1	2014-08-02	47	3	0.29	90	dr	5.8	5.3704	10.7154	8.5115	9.5501	6.0257	7.5859	6.0257	6.7609	4.2659	4.7864
Sub1	2014-08-02	47	3	0.29	90	dr	5.17	4.2659	5.3704	4.2659	4.7864	4.2659	6.7609	4.7864	5.3704	4.7864	5.3704
Sub1	2014-08-02	47	3	0.29	90	dr	5.8	5.3704	8.5115	6.0257	8.5115	4.7864	6.7609	6.0257	6.7609	4.7864	6.0257
Sub1	2014-08-02	47	3	0.29	90	dr	7.16	4.2659	6.7609	5.3704	6.0257	5.3704	8.5115	7.5859	9.5501	6.0257	6.7609
Sub1	2014-08-02	47	3	0.29	90	dr	6.63	6.7609	8.5115	5.3704	6.7609	6.0257	6.7609	6.0257	7.5859	6.0257	7.5859
Sub1	2014-08-02	47	3	0.29	90	dr	7.59	8.5115	10.7154	6.0257	7.5859	6.0257	7.5859	6.7609	7.5859	6.7609	12.0228
Sub1	2014-08-02	47	3	0.29	90	dr	5.69	5.3704	8.5115	6.0257	6.7609	5.3704	6.0257	5.3704	6.0257	5.3704	6.0257
Sub1	2014-08-02	47	3	0.29	90	dr	4.88	13.4898	8.5115	10.7154	3.802	4.2659	3.802	6.0257	4.7864	6.0257	4.7864
Sub1	2014-08-02	47	3	0.29	90	dr	6.76	6.7609	8.5115	6.0257	6.7609	5.3704	6.7609	6.0257	7.5859	6.7609	8.5115
Sub1	2014-08-02	47	3	0.29	90	dr	8.35	8.5115	10.7154	8.5115	9.5501	8.5115	9.5501	8.5115	9.5501	6.7609	7.5859
Sub1	2014-08-02	47	3	0.29	90	dr	6.14	5.3704	6.7609	4.2659	6.7609	6.0257	6.7609	3.802	8.5115	5.3704	7.5859
Sub1	2014-08-02	47	3	0.29	90	dr	6.63	6.7609	10.7154	8.5115	9.5501	6.7609	7.5859	6.0257	6.7609	6.0257	6.7609
Sub1	2014-08-02	47	3	0.29	90	dr	5.69	8.5115	13.4898	9.5501	10.7154	6.0257	6.7609	4.7864	6.0257	4.7864	6.0257
Sub1	2014-08-02	47	3	0.29	90	dr	10.12	4.2659	13.4898	10.7154	13.4898	9.5501	10.7154	9.5501	10.7154	9.5501	10.7154
Sub1	2014-08-02	47	3	0.29	90	dr	8.04	8.5115	13.4898	6.0257	6.7609	5.3704	9.5501	6.7609	9.5501	8.5115	9.5501
Sub1	2014-08-03	47	3	0.29	90	dr	8.84	8.5115	10.7154	8.5115	12.0228	10.7154	16.9827	6.0257	7.5859	6.7609	8.5115
Sub1	2014-08-03	47	3	0.29	90	dr	5.69	8.5115	10.7154	6.0257	9.5501	8.5115	9.5501	3.802	4.7864	4.2659	5.3704
Sub1	2014-08-03	47	3	0.29	90	dr	6.76	6.7609	8.5115	6.0257	8.5115	6.0257	6.7609	6.0257	7.5859	6.7609	7.5859
Sub1	2014-08-03	47	3	0.29	90	dr	3.88	2.6916	4.2659	3.3885	3.802	3.02	4.2659	3.802	4.2659	3.802	4.2659
Sub1	2014-08-03	47	3	0.29	90	dr	5.8	13.4898	6.7609	8.5115	7.5859	8.5115	6.0257	7.5859	4.2659	5.3704	4.2659
Sub1	2014-08-03	47	3	0.29	90	dr	7.44	8.5115	10.7154	8.5115	13.4898	9.5501	10.7154	6.0257	6.7609	6.0257	6.7609
Sub1	2014-08-03	47	3	0.29	90	dr	6.14	8.5115	10.7154	7.5859	9.5501	6.0257	8.5115	6.7609	7.5859	4.2659	4.7864
Sub1	2014-08-03	47	3	0.29	90	dr	6.38	5.3704	6.7609	5.3704	6.0257	5.3704	6.7609	6.0257	8.5115	4.7864	7.5859
Sub1	2014-08-03	47	3	0.29	90	dr	5.58	6.7609	8.5115	5.3704	6.0257	5.3704	6.0257	4.7864	6.0257	5.3704	6.0257
Sub1	2014-08-03	47	3	0.29	90	dr	3.02	1.6983	2.6916	1.9055	2.138	1.9055	2.138	1.9055	5.3704	3.802	4.7864
Sub1	2014-08-03	47	3	0.29	90	dr	5.58	6.7609	8.5115	6.7609	9.5501	6.0257	6.7609	5.3704	6.7609	4.2659	4.7864
Sub1	2014-08-03	47	3	0.29	90	dr	7.59	6.7609	10.7154	8.5115	9.5501	7.5859	8.5115	6.7609	7.5859	6.7609	8.5115
Sub1	2014-08-03	47	3	0.29	90	dr	3.59	5.3704	6.7609	5.3704	6.0257	3.802	4.2659	3.02	3.3885	3.02	4.2659
Sub1	2014-08-03	47	3	0.29	90	dr	3.32	6.7609	10.7154	4.2659	4.7864	3.802	4.2659	3.02	3.3885	2.6916	3.02
Sub1	2014-08-03	47	3	0.29	90	dr	5.37	8.5115	10.7154	6.0257	6.7609	4.2659	5.3704	4.7864	6.7609	5.3704	6.0257
Sub1	2014-08-03	47	3	0.29	90	dr	6.63	8.5115	10.7154	8.5115	9.5501	7.5859	8.5115	7.5859	8.5115	3.802	5.3704
Sub1	2014-08-04	47	3	0.29	90	dr	3.59	2.6916	3.3885	2.6916	3.02	2.6916	3.02	2.6916	4.2659	3.802	6.0257
Sub1	2014-08-04	47	3	0.29	90	dr	5.58	6.7609	8.5115	3.802	5.3704	4.2659	6.0257	5.3704	6.0257	5.3704	6.7609
Sub1	2014-08-04	47	3	0.29	90	dr	4.11	4.2659	5.3704	3.3885	4.7864	4.2659	4.7864	3.802	4.7864	3.02	4.2659
Sub1	2014-08-04	47	3	0.29	90	dr	5.47	6.7609	8.5115	6.7609	7.5859	5.3704	6.7609	5.3704	6.0257	4.2659	5.3704
Sub1	2014-08-04	47	3	0.29	90	dr	4.79	6.7609	8.5115	5.3704	6.0257	4.2659	4.7864	4.2659	5.3704	3.802	6.7609
Sub1	2014-08-04	47	3	0.29	90	dr	7.3	6.7609	8.5115	6.7609	8.5115	6.7609	7.5859	6.7609	7.5859	6.7609	8.5115
Sub1	2014-08-04	47	3	0.29	90	dr	2.91	2.6916	3.3885	2.6916	3.02	2.6916	3.3885	2.6916	3.02	2.6916	3.02
Sub1	2014-08-04	47	3	0.29	90	dr	4.27	3.3885	4.2659	3.3885	4.2659	3.802	4.7864	3.802	4.7864	3.802	4.7864
Sub1	2014-08-04	47	3	0.29	90	dr	7.03	13.4898	8.5115	12.0228	10.7154	12.0228	7.5859	8.5115	6.0257	6.7609	3.802
Sub1	2014-08-04	47	3	0.29	90	dr	5.37	6.7609	8.5115	6.7609	7.5859	5.3704	6.0257	5.3704	6.0257	4.2659	5.3704
Sub1	2014-08-04	47	3	0.29	90	dr	5.58	8.5115	10.7154	5.3704	6.0257	5.3704	6.0257	5.3704	6.7609	4.7864	5.3704
Sub1	2014-08-04	47	3	0.29	90	dr	7.88	3.3885	5.3704	4.2659	5.3704	4.2659	7.5859	6.0257	12.0228	9.5501	10.7154
Sub1	2014-08-04	47	3	0.29	90	dr	4.79	6.7609	10.7154	8.5115	9.5501	4.2659	4.7864	4.2659	5.3704	4.7864	5.3704
Sub1	2014-08-04	47	3	0.29	90	dr	5.37	5.3704	8.5115	6.7609	7.5859	6.0257	6.7609	3.802	5.3704	4.7864	6.0257
Sub1	2014-08-04	47	3	0.29	90	dr	7.59	8.5115	13.4898	6.7609	7.5859	6.7609	8.5115	7.5859	8.5115	6.7609	7.5859
Sub1	2014-08-04	47	3	0.29	90	dr	6.51	5.3704	10.7154	6.0257	6.7609	5.3704	8.5115	6.7609	7.5859	5.3704	6.0257
Sub1	2014-08-05	47	3	0.29	90	dr	5.58	8.5115	10.7154	7.5859	8.5115	4.7864	6.0257	5.3704	6.0257	5.3704	6.0257
Sub1	2014-08-05	47	3	0.29	90	dr	6.38	8.5115	10.7154	5.3704	6.0257	4.7864	6.0257	5.3704	6.7609	6.0257	10.7154
Sub1	2014-08-05	47	3	0.29	90	dr	3.73	3.3885	5.3704	4.2659	4.7864	3.802	4.2659	3.3885	3.802	2.6916	4.7864
Sub1	2014-08-05	47	3	0.29	90	dr	8.51	8.5115	10.7154	8.5115	9.5501	8.5115	9.5501	8.5115	10.7154	6.7609	7.5859
Sub1	2014-08-05	47	3	0.29	90	dr	4.61	5.3704	6.7609	4.2659	6.7609	4.2659	4.7864	3.3885	5.3704	4.7864	5.3704
Sub1	2014-08-05	47	3	0.29	90	ul	14.57	16.9827	8.5115	10.7154	9.5501	15.1358	13.4898	16.9827	13.4898	15.1358	13.4898
Sub1	2014-08-05	47	3	0.29	90	ul	9.37	6.7609	10.7154	8.5115	9.5501	7.5859	9.5501	8.5115	10.7154	9.5501	10.7154
Sub1	2014-08-05	47	3	0.29	90	ul	9.02	8.5115	10.7154	8.5115	9.5501	7.5859	13.4898	8.5115	9.5501	6.7609	9.5501
Sub1	2014-08-05	47	3	0.29	90	ul	7.59	5.3704	10.7154	8.5115	9.5501	7.5859	12.0228	6.7609	7.5859	6.0257	6.7609
Sub1	2014-08-05	47	3	0.29	90	ul	5.69	8.5115	10.7154	7.5859	8.5115	5.3704	6.0257	4.7864	6.0257	4.7864	7.5859
Sub2	2014-07-30	47	3	0.29	90	dr	9.02	5.3704	6.7609	4.7864	6.7609	6.0257	9.5501	8.5115	9.5501	8.5115	13.4898
Sub2	2014-07-30	47	3	0.29	90	dr	9.55	8.5115	13.4898	10.7154	12.0228	7.5859	8.5115	7.5859	12.0228	10.7154	12.0228
Sub2	2014-07-30	47	3	0.29	90	dr	8.19	8.5115	10.7154	6.7609	7.5859	6.0257	8.5115	7.5859	9.5501	8.5115	9.5501
Sub2	2014-07-30	47	3	0.29	90	dr	7.16	8.5115	10.7154	8.5115	9.5501	6.7609	7.5859	6.7609	7.5859	6.7609	7.5859
Sub2	2014-07-30	47	3	0.29	90	dr	5.69	6.7609	8.5115	6.0257	7.5859	4.7864	6.0257	4.7864	7.5859	5.3704	6.0257
Sub2	2014-07-30	47	3	0.29	90	dr	6.63	5.3704	8.5115	6.0257	7.5859	6.7609	7.5859	6.7609	7.5859	5.3704	6.0257
Sub2	2014-07-30	47	3	0.29	90	ul	7.88	13.4898	5.3704	7.5859	6.7609	7.5859	6.7609	7.5859	6.7609	12.0228	7.5859
Sub2	2014-07-30	47	3	0.29	90	ul	7.88	6.7609	8.5115	6.7609	7.5859	6.0257	8.5115	7.5859	8.5115	7.5859	9.5501
Sub2	2014-07-30	47	3	0.29	90	ul	9.55	13.4898	8.5115	12.0228	8.5115	10.7154	8.5115	12.0228	8.5115	9.5501	8.5115
Sub2	2014-07-30	47	3	0.29	90	ul	7.44	8.5115	10.7154	7.5859	8.5115	7.5859	8.5115	6.7609	10.7154	4.7864	7.5859
Sub2	2014-07-30	47	3	0.29	90	ul	5.37	13.4898	10.7154	13.4898	7.5859	8.5115	5.3704	6.7609	4.2659	4.7864	3.802
Sub2	2014-07-30	47	3	0.29	90	ul	5.47	4.2659	6.7609	5.3704	6.7609	5.3704	6.0257	4.7864	6.0257	4.7864	6.0257
Sub2	2014-07-31	47	3	0.29	90	dr	9.92	5.3704	13.4898	10.7154	12.0228	9.5501	10.7154	8.5115	10.7154	9.5501	10.7154
Sub2	2014-07-31	47	3	0.29	90	dr	7.03	6.7609	10.7154	6.7609	7.5859	6.7609	7.5859	6.7609	7.5859	6.0257	7.5859
Sub2	2014-07-31	47	3	0.29	90	dr	4.35	4.2659	5.3704	3.3885	4.2659	3.3885	4.7864	4.2659	4.7864	4.2659	4.7864
Sub2	2014-07-31	47	3	0.29	90	dr	6.26	6.7609	10.7154	6.7609	7.5859	6.7609	8.5115	5.3704	6.0257	5.3704	6.0257
Sub2	2014-07-31	47	3	0.29	90	dr	8.04	8.5115	10.7154	8.5115	9.5501	7.5859	8.5115	7.5859	8.5115	7.5859	8.5115
Sub2	2014-07-31	47	3	0.29	90	dr	4.52	5.3704	6.7609	4.2659	5.3704	4.7864	6.0257	3.802	4.2659	3.802	4.7864
Sub2	2014-07-31	47	3	0.29	90	dr	6.26	5.3704	6.7609	5.3704	6.0257	5.3704	6.7609	6.0257	8.5115	5.3704	6.0257
Sub2	2014-07-31	47	3	0.29	90	dr	4.88	4.2659	5.3704	4.2659	4.7864	4.2659	5.3704	4.2659	5.3704	4.7864	5.3704
Sub2	2014-07-31	47	3	0.29	90	dr	5.69	13.4898	6.7609	8.5115	5.3704	6.0257	5.3704	6.0257	5.3704	6.0257	5.3704
Sub2	2014-07-31	47	3	0.29	90	dr	4.35	8.5115	10.7154	7.5859	8.5115	4.2659	4.7864	3.802	4.2659	3.802	5.3704
Sub2	2014-07-31	47	3	0.29	90	dr	5.8	3.3885	8.5115	6.0257	6.7609	6.0257	8.5115	3.802	6.0257	5.3704	6.0257
Sub2	2014-07-31	47	3	0.29	90	dr	6.14	16.9827	5.3704	6.7609	4.7864	6.0257	5.3704	6.7609	6.0257	6.7609	6.0257
Sub2	2014-07-31	47	3	0.29	90	dr	5.07	5.3704	6.7609	4.2659	4.7864	3.802	6.0257	5.3704	6.0257	4.2659	5.3704
Sub2	2014-07-31	47	3	0.29	90	dr	7.73	13.4898	5.3704	8.5115	5.3704	8.5115	6.7609	8.5115	6.7609	8.5115	7.5859
Sub2	2014-07-31	47	3	0.29	90	dr	5.27	5.3704	6.7609	3.02	3.802	3.3885	3.802	3.3885	9.5501	6.0257	8.5115
Sub2	2014-07-31	47	3	0.29	90	dr	9.19	6.7609	8.5115	5.3704	10.7154	9.5501	10.7154	7.5859	9.5501	8.5115	9.5501
Sub2	2014-08-01	47	3	0.29	90	dr	6.63	6.7609	8.5115	6.7609	7.5859	6.7609	7.5859	6.0257	6.7609	6.0257	6.7609
Sub2	2014-08-01	47	3	0.29	90	dr	5.07	8.5115	10.7154	7.5859	8.5115	4.7864	5.3704	4.7864	6.7609	4.2659	4.7864
Sub2	2014-08-01	47	3	0.29	90	dr	3.2	2.6916	3.3885	2.6916	3.3885	3.02	3.3885	3.02	3.3885	3.02	3.3885
Sub2	2014-08-01	47	3	0.29	90	dr	5.47	6.7609	8.5115	5.3704	6.7609	6.0257	6.7609	5.3704	6.0257	4.2659	4.7864
Sub2	2014-08-01	47	3	0.29	90	dr	3.73	5.3704	6.7609	5.3704	6.0257	3.802	4.2659	3.02	3.802	3.3885	4.2659
Sub2	2014-08-01	47	3	0.29	90	dr	5.37	5.3704	8.5115	6.7609	8.5115	4.7864	5.3704	4.7864	6.0257	5.3704	6.0257
Sub2	2014-08-01	47	3	0.29	90	dr	6.51	5.3704	6.7609	4.7864	6.0257	5.3704	6.0257	5.3704	8.5115	6.7609	7.5859
Sub2	2014-08-01	47	3	0.29	90	dr	5.8	5.3704	6.7609	4.7864	6.0257	5.3704	6.7609	5.3704	6.0257	5.3704	6.0257
Sub2	2014-08-01	47	3	0.29	90	dr	3.95	4.2659	5.3704	3.3885	4.2659	3.3885	4.2659	3.802	4.2659	3.802	4.2659
Sub2	2014-08-01	47	3	0.29	90	dr	4.03	2.138	5.3704	4.2659	4.7864	3.802	4.2659	3.802	4.2659	3.802	4.2659
Sub2	2014-08-01	47	3	0.29	90	dr	7.44	13.4898	6.7609	8.5115	7.5859	8.5115	6.7609	8.5115	6.7609	7.5859	6.7609
Sub2	2014-08-01	47	3	0.29	90	dr	5.47	4.2659	6.7609	3.3885	5.3704	3.802	5.3704	4.7864	6.0257	5.3704	8.5115
Sub2	2014-08-01	47	3	0.29	90	dr	5.07	4.2659	6.7609	4.2659	4.7864	3.802	5.3704	4.7864	5.3704	4.7864	6.7609
Sub2	2014-08-01	47	3	0.29	90	dr	4.52	3.3885	4.2659	3.3885	3.802	3.3885	4.2659	3.802	5.3704	4.7864	6.0257
Sub2	2014-08-01	47	3	0.29	90	dr	3.73	4.2659	5.3704	3.802	4.2659	3.3885	4.2659	3.802	4.7864	3.02	3.3885
Sub2	2014-08-01	47	3	0.29	90	dr	6.26	6.7609	8.5115	6.7609	7.5859	6.0257	6.7609	4.7864	6.7609	5.3704	8.5115
Sub2	2014-08-03	47	3	0.29	90	dr	7.3	5.3704	10.7154	6.7609	7.5859	6.7609	7.5859	6.7609	7.5859	6.7609	8.5115
Sub2	2014-08-03	47	3	0.29	90	dr	6.03	8.5115	10.7154	4.7864	6.7609	5.3704	6.0257	5.3704	6.7609	6.0257	6.7609
Sub2	2014-08-03	47	3	0.29	90	dr	4.11	4.2659	5.3704	4.2659	4.7864	4.2659	4.7864	3.3885	4.7864	3.3885	4.2659
Sub2	2014-08-03	47	3	0.29	90	dr	6.03	6.7609	10.7154	6.7609	7.5859	6.7609	7.5859	5.3704	6.7609	4.7864	5.3704
Sub2	2014-08-03	47	3	0.29	90	dr	5.27	6.7609	8.5115	6.7609	7.5859	4.7864	6.0257	5.3704	6.7609	4.2659	4.7864
Sub2	2014-08-03	47	3	0.29	90	dr	6.63	8.5115	10.7154	7.5859	8.5115	6.7609	7.5859	6.0257	6.7609	6.0257	6.7609
Sub2	2014-08-03	47	3	0.29	90	dr	4.18	8.5115	10.7154	6.0257	6.7609	3.802	4.7864	3.3885	4.7864	3.802	4.7864
Sub2	2014-08-03	47	3	0.29	90	dr	6.14	6.7609	8.5115	4.7864	6.0257	5.3704	6.7609	6.0257	6.7609	5.3704	6.7609
Sub2	2014-08-03	47	3	0.29	90	dr	5.27	6.7609	8.5115	4.2659	5.3704	4.7864	6.7609	6.0257	6.7609	3.802	4.2659
Sub2	2014-08-03	47	3	0.29	90	dr	5.8	6.7609	8.5115	5.3704	6.7609	6.0257	6.7609	6.0257	8.5115	3.802	4.7864
Sub2	2014-08-03	47	3	0.29	90	dr	4.18	13.4898	3.3885	5.3704	4.7864	5.3704	3.802	4.2659	3.802	4.2659	3.802
Sub2	2014-08-03	47	3	0.29	90	dr	3.45	4.2659	5.3704	4.2659	4.7864	4.2659	5.3704	2.6916	3.3885	2.6916	3.02
Sub2	2014-08-03	47	3	0.29	90	dr	3.95	5.3704	6.7609	4.7864	5.3704	4.2659	5.3704	3.02	3.802	3.02	4.7864
Sub2	2014-08-03	47	3	0.29	90	dr	3.88	3.3885	5.3704	4.2659	4.7864	3.3885	4.2659	3.802	4.2659	3.3885	4.2659
Sub2	2014-08-03	47	3	0.29	90	dr	7.03	5.3704	6.7609	5.3704	6.7609	6.0257	6.7609	6.0257	8.5115	6.7609	8.5115
Sub2	2014-08-03	47	3	0.29	90	dr	6.26	6.7609	8.5115	5.3704	6.0257	5.3704	6.7609	6.0257	6.7609	6.0257	6.7609
Sub2	2014-08-04	47	3	0.29	90	dr	4.88	3.3885	5.3704	4.2659	4.7864	4.2659	6.0257	4.7864	5.3704	4.2659	4.7864
Sub2	2014-08-04	47	3	0.29	90	dr	4.52	4.2659	6.7609	4.2659	4.7864	4.2659	4.7864	4.2659	4.7864	4.2659	4.7864
Sub2	2014-08-04	47	3	0.29	90	dr	3.2	2.138	3.3885	2.6916	3.3885	3.02	3.3885	3.02	3.3885	3.02	3.3885
Sub2	2014-08-04	47	3	0.29	90	dr	5.8	3.3885	4.2659	3.3885	4.2659	3.802	6.0257	5.3704	6.7609	6.0257	7.5859
Sub2	2014-08-04	47	3	0.29	90	dr	3.2	3.3885	5.3704	3.802	4.2659	3.02	3.802	2.6916	3.3885	3.02	3.3885
Sub2	2014-08-04	47	3	0.29	90	dr	4.61	6.7609	10.7154	4.7864	5.3704	4.7864	5.3704	3.802	4.7864	3.802	5.3704
Sub2	2014-08-04	47	3	0.29	90	dr	6.03	6.7609	8.5115	6.7609	7.5859	5.3704	6.0257	4.7864	6.7609	6.0257	7.5859
Sub2	2014-08-04	47	3	0.29	90	dr	5.27	2.6916	6.7609	5.3704	6.0257	4.7864	6.0257	4.7864	6.0257	4.7864	5.3704
Sub2	2014-08-04	47	3	0.29	90	dr	4.97	5.3704	6.7609	4.7864	5.3704	4.7864	6.7609	4.7864	6.0257	3.802	4.2659
Sub2	2014-08-04	47	3	0.29	90	dr	4.97	4.2659	5.3704	3.3885	5.3704	4.2659	5.3704	4.2659	5.3704	4.7864	6.0257
Sub2	2014-08-04	47	3	0.29	90	dr	3.66	3.3885	4.2659	3.02	5.3704	4.7864	5.3704	2.6916	3.02	2.3989	4.7864
Sub2	2014-08-04	47	3	0.29	90	dr	3.73	4.2659	6.7609	2.6916	3.3885	3.02	3.802	3.3885	3.802	3.3885	5.3704
Sub2	2014-08-04	47	3	0.29	90	dr	7.03	4.2659	6.7609	5.3704	6.0257	5.3704	8.5115	6.7609	7.5859	6.7609	7.5859
Sub2	2014-08-04	47	3	0.29	90	dr	4.61	6.7609	8.5115	6.0257	7.5859	4.7864	5.3704	3.802	4.7864	4.2659	4.7864
Sub2	2014-08-04	47	3	0.29	90	dr	4.61	5.3704	6.7609	4.2659	5.3704	4.7864	6.0257	4.2659	5.3704	3.3885	4.2659
Sub2	2014-08-04	47	3	0.29	90	dr	6.14	6.7609	8.5115	6.7609	7.5859	6.7609	8.5115	5.3704	6.0257	4.7864	6.0257
Sub2	2014-08-05	47	3	0.29	90	dr	7.03	6.7609	8.5115	6.7609	8.5115	6.0257	10.7154	6.7609	7.5859	5.3704	6.7609
Sub2	2014-08-05	47	3	0.29	90	dr	4.7	5.3704	6.7609	5.3704	6.0257	3.802	4.7864	3.802	6.0257	4.7864	5.3704
Sub2	2014-08-05	47	3	0.29	90	dr	4.61	3.3885	4.2659	3.3885	4.2659	3.802	4.2659	3.802	5.3704	4.7864	6.0257
Sub2	2014-08-05	47	3	0.29	90	dr	4.18	2.6916	3.3885	2.6916	3.3885	3.02	4.7864	4.2659	5.3704	3.802	4.2659
Sub2	2014-08-05	47	3	0.29	90	dr	5.17	6.7609	8.5115	4.2659	6.7609	6.0257	7.5859	3.3885	4.7864	4.2659	6.0257
Sub2	2014-08-05	47	3	0.29	90	dr	4.11	6.7609	8.5115	6.0257	6.7609	4.2659	5.3704	3.802	6.0257	2.6916	3.3885
Sub2	2014-08-05	47	3	0.29	90	dr	5.07	8.5115	10.7154	6.0257	8.5115	5.3704	6.0257	4.7864	5.3704	4.2659	4.7864
Sub2	2014-08-05	47	3	0.29	90	dr	4.97	5.3704	6.7609	5.3704	6.0257	3.802	6.0257	5.3704	6.0257	4.2659	4.7864
Sub2	2014-08-05	47	3	0.29	90	dr	5.27	6.7609	8.5115	6.7609	7.5859	5.3704	6.0257	4.2659	6.0257	4.7864	5.3704
Sub2	2014-08-05	47	3	0.29	90	dr	7.59	2.6916	6.7609	4.7864	6.7609	5.3704	8.5115	7.5859	8.5115	7.5859	8.5115
Sub2	2014-08-05	47	3	0.29	90	dr	4.88	13.4898	6.7609	8.5115	3.802	4.7864	4.2659	5.3704	4.7864	5.3704	4.7864
Sub2	2014-08-05	47	3	0.29	90	dr	2.69	3.3885	4.2659	3.3885	4.2659	2.6916	3.02	2.3989	2.6916	2.138	3.3885
Sub2	2014-08-05	47	3	0.29	90	dr	4.27	5.3704	6.7609	5.3704	6.0257	4.7864	6.0257	3.802	4.2659	3.3885	3.802
Sub2	2014-08-05	47	3	0.29	90	dr	4.35	6.7609	8.5115	6.0257	8.5115	4.7864	6.0257	3.3885	4.7864	3.3885	4.2659
Sub2	2014-08-05	47	3	0.29	90	dr	3.08	5.3704	6.7609	4.2659	4.7864	3.3885	3.802	3.02	3.3885	2.3989	2.6916
Sub2	2014-08-05	47	3	0.29	90	dr	3.59	3.3885	5.3704	4.2659	5.3704	3.802	4.2659	3.3885	3.802	2.6916	3.802
Sub2	2014-08-06	47	3	0.29	90	dr	4.35	5.3704	6.7609	5.3704	6.7609	5.3704	6.0257	4.7864	5.3704	2.6916	3.02
Sub2	2014-08-06	47	3	0.29	90	dr	4.61	2.6916	4.2659	3.3885	4.7864	3.802	5.3704	4.7864	5.3704	3.802	4.7864
Sub2	2014-08-06	47	3	0.29	90	dr	3.08	1.6983	2.138	1.6983	3.3885	2.138	3.02	2.6916	3.802	3.3885	3.802
Sub2	2014-08-06	47	3	0.29	90	dr	4.52	4.2659	5.3704	4.2659	4.7864	4.2659	4.7864	4.2659	4.7864	4.2659	4.7864
Sub2	2014-08-06	47	3	0.29	90	dr	4.35	5.3704	6.7609	5.3704	6.0257	5.3704	6.0257	3.3885	3.802	3.3885	4.7864
Sub2	2014-08-06	47	3	0.29	90	ul	4.88	4.2659	5.3704	4.2659	4.7864	3.3885	3.802	3.3885	6.7609	6.0257	7.5859
Sub2	2014-08-06	47	3	0.29	90	ul	3.88	4.2659	5.3704	4.2659	5.3704	3.3885	4.7864	3.802	4.2659	3.3885	3.802
Sub2	2014-08-06	47	3	0.29	90	ul	4.79	6.7609	8.5115	4.2659	4.7864	4.2659	4.7864	4.2659	5.3704	4.7864	5.3704
Sub2	2014-08-06	47	3	0.29	90	ul	5.07	3.3885	6.7609	4.7864	6.7609	5.3704	6.0257	5.3704	6.0257	3.3885	4.7864
Sub2	2014-08-06	47	3	0.29	90	ul	7.16	8.5115	10.7154	7.5859	9.5501	6.0257	8.5115	7.5859	8.5115	6.0257	6.7609
Sub3	2014-07-30	47	3	0.29	90	ul	5.47	6.7609	8.5115	6.7609	8.5115	5.3704	6.0257	5.3704	6.0257	4.7864	5.3704
Sub3	2014-07-30	47	3	0.29	90	ul	7.03	8.5115	10.7154	5.3704	6.7609	6.0257	7.5859	6.7609	7.5859	6.7609	7.5859
Sub3	2014-07-30	47	3	0.29	90	ul	5.69	6.7609	8.5115	6.0257	6.7609	5.3704	6.0257	4.7864	6.0257	5.3704	6.7609
Sub3	2014-07-30	47	3	0.29	90	ul	6.76	6.7609	13.4898	8.5115	9.5501	5.3704	7.5859	6.7609	7.5859	6.0257	7.5859
Sub3	2014-07-30	47	3	0.29	90	ul	3.45	3.3885	4.2659	3.3885	3.802	3.3885	3.802	3.3885	3.802	2.6916	3.802
Sub3	2014-07-30	47	3	0.29	90	ul	4.88	5.3704	6.7609	4.2659	5.3704	4.2659	6.0257	3.802	4.7864	4.2659	6.7609
Sub3	2014-07-30	47	3	0.29	90	dr	7.3	13.4898	5.3704	6.7609	6.0257	7.5859	6.7609	7.5859	6.7609	8.5115	6.7609
Sub3	2014-07-30	47	3	0.29	90	dr	5.07	6.7609	8.5115	5.3704	6.7609	4.7864	5.3704	4.2659	6.0257	4.7864	5.3704
Sub3	2014-07-30	47	3	0.29	90	dr	3.26	5.3704	8.5115	3.3885	3.802	3.02	4.2659	2.3989	3.3885	2.6916	4.2659
Sub3	2014-07-30	47	3	0.29	90	dr	3.52	3.3885	4.2659	3.02	3.802	3.3885	3.802	3.3885	4.2659	3.02	3.3885
Sub3	2014-07-30	47	3	0.29	90	dr	4.97	6.7609	8.5115	6.0257	6.7609	6.0257	6.7609	3.802	4.7864	4.2659	4.7864
Sub3	2014-07-30	47	3	0.29	90	dr	4.03	4.2659	6.7609	3.3885	4.2659	3.802	5.3704	3.3885	3.802	3.3885	4.7864
Sub3	2014-07-31	47	3	0.29	90	ul	2.54	3.3885	5.3704	3.3885	3.802	2.6916	3.02	2.6916	3.02	1.9055	2.138
Sub3	2014-07-31	47	3	0.29	90	ul	4.35	9.5501	6.0257	7.5859	4.7864	5.3704	4.7864	5.3704	3.02	4.2659	3.802
Sub3	2014-07-31	47	3	0.29	90	ul	3.8	6.0257	7.5859	3.3885	4.2659	3.802	4.2659	3.3885	3.802	3.3885	4.2659
Sub3	2014-07-31	47	3	0.29	90	ul	5.91	6.0257	7.5859	6.0257	6.7609	6.0257	6.7609	5.3704	6.0257	4.7864	6.7609
Sub3	2014-07-31	47	3	0.29	90	ul	2.59	2.3989	3.02	1.9055	3.3885	2.3989	2.6916	2.3989	3.02	2.3989	2.6916
Sub3	2014-07-31	47	3	0.29	90	ul	4.52	4.7864	6.0257	4.7864	5.3704	4.7864	5.3704	4.7864	5.3704	3.3885	3.802
Sub3	2014-07-31	47	3	0.29	90	ul	5.47	3.802	4.7864	3.802	4.7864	3.3885	6.7609	5.3704	6.0257	5.3704	6.7609
Sub3	2014-07-31	47	3	0.29	90	ul	7.3	9.5501	3.802	4.7864	4.2659	7.5859	6.0257	8.5115	7.5859	8.5115	6.0257
Sub3	2014-07-31	47	3	0.29	90	ul	4.03	3.802	6.0257	3.802	4.7864	4.2659	4.7864	3.802	4.2659	3.3885	3.802
Sub3	2014-07-31	47	3	0.29	90	ul	4.03	9.5501	3.802	5.3704	3.802	4.7864	3.802	4.2659	3.3885	4.7864	3.3885
Sub3	2014-07-31	47	3	0.29	90	ul	4.43	9.5501	6.0257	7.5859	5.3704	6.0257	5.3704	6.0257	3.3885	3.802	3.02
Sub3	2014-07-31	47	3	0.29	90	ul	3.39	3.02	6.0257	4.2659	4.7864	4.2659	4.7864	3.3885	3.802	2.138	2.6916
Sub3	2014-07-31	47	3	0.29	90	ul	5.91	6.0257	9.5501	6.0257	6.7609	4.7864	6.7609	5.3704	7.5859	5.3704	6.0257
Sub3	2014-07-31	47	3	0.29	90	ul	5.27	4.7864	9.5501	7.5859	8.5115	4.7864	6.7609	4.2659	4.7864	4.2659	7.5859
Sub3	2014-07-31	47	3	0.29	90	ul	4.97	6.0257	7.5859	3.802	6.0257	4.7864	5.3704	4.2659	5.3704	4.2659	6.0257
Sub3	2014-07-31	47	3	0.29	90	ul	4.18	4.7864	7.5859	4.2659	5.3704	3.3885	4.2659	3.802	4.7864	4.2659	4.7864
Sub3	2014-08-01	47	3	0.29	90	ul	2.59	3.02	3.802	2.6916	3.02	2.6916	3.02	1.9055	2.3989	2.138	3.802
Sub3	2014-08-01	47	3	0.29	90	ul	3.2	3.02	7.5859	4.2659	5.3704	3.02	3.3885	2.6916	3.802	3.02	3.3885
Sub3	2014-08-01	47	3	0.29	90	ul	3.88	9.5501	6.0257	7.5859	3.02	3.802	2.3989	4.7864	4.2659	4.7864	3.802
Sub3	2014-08-01	47	3	0.29	90	ul	5.47	3.02	7.5859	4.2659	4.7864	4.2659	6.7609	4.2659	6.0257	5.3704	6.7609
Sub3	2014-08-01	47	3	0.29	90	ul	3.02	9.5501	2.3989	3.802	2.6916	3.02	2.6916	3.02	2.3989	3.802	3.3885
Sub3	2014-08-01	47	3	0.29	90	ul	3.26	4.7864	6.0257	4.7864	5.3704	3.02	3.3885	3.02	3.3885	3.02	3.802
Sub3	2014-08-01	47	3	0.29	90	ul	3.39	9.5501	3.02	3.802	3.3885	4.2659	3.802	4.2659	2.6916	3.02	2.6916
Sub3	2014-08-01	47	3	0.29	90	ul	5.07	3.802	4.7864	3.802	5.3704	4.7864	6.0257	3.802	6.0257	4.7864	5.3704
Sub3	2014-08-01	47	3	0.29	90	ul	4.52	4.7864	6.0257	4.2659	6.0257	4.2659	4.7864	3.802	5.3704	3.802	5.3704
Sub3	2014-08-01	47	3	0.29	90	ul	2.45	2.3989	3.02	2.3989	2.6916	1.6983	2.6916	2.3989	2.6916	2.3989	3.02
Sub3	2014-08-01	47	3	0.29	90	ul	4.03	3.802	4.7864	3.802	6.0257	3.802	5.3704	4.7864	5.3704	2.6916	3.02
Sub3	2014-08-01	47	3	0.29	90	ul	5.37	6.0257	7.5859	5.3704	6.7609	4.7864	6.0257	5.3704	6.0257	4.2659	6.0257
Sub3	2014-08-01	47	3	0.29	90	ul	5.17	6.0257	7.5859	6.0257	6.7609	5.3704	6.0257	4.2659	4.7864	4.2659	6.7609
Sub3	2014-08-01	47	3	0.29	90	ul	4.97	3.802	6.0257	4.2659	5.3704	4.7864	5.3704	4.7864	6.0257	4.2659	4.7864
Sub3	2014-08-01	47	3	0.29	90	ul	3.2	2.3989	3.02	2.3989	2.6916	2.138	2.3989	2.138	4.7864	4.2659	4.7864
Sub3	2014-08-01	47	3	0.29	90	ul	4.27	3.02	6.0257	4.2659	4.7864	3.3885	3.802	3.3885	5.3704	4.7864	5.3704
Sub3	2014-08-02	47	3	0.29	90	ul	4.03	6.0257	7.5859	4.7864	5.3704	4.2659	4.7864	3.802	4.2659	3.3885	3.802
Sub3	2014-08-02	47	3	0.29	90	ul	6.38	6.0257	9.5501	6.0257	7.5859	6.0257	6.7609	6.0257	6.7609	6.0257	6.7609
Sub3	2014-08-02	47	3	0.29	90	ul	4.88	6.0257	7.5859	5.3704	6.0257	5.3704	6.0257	4.2659	5.3704	3.802	4.7864
Sub3	2014-08-02	47	3	0.29	90	ul	6.03	3.802	6.0257	4.7864	6.0257	5.3704	6.7609	4.2659	6.7609	6.0257	7.5859
Sub3	2014-08-02	47	3	0.29	90	ul	5.69	9.5501	7.5859	9.5501	6.0257	6.7609	6.0257	6.7609	4.7864	5.3704	4.7864
Sub3	2014-08-02	47	3	0.29	90	ul	1.94	1.5136	2.3989	1.9055	2.138	1.9055	2.138	1.6983	1.9055	1.6983	2.3989
Sub3	2014-08-02	47	3	0.29	90	ul	6.03	3.02	6.0257	4.7864	6.0257	5.3704	6.0257	5.3704	6.0257	4.7864	9.5501
Sub3	2014-08-02	47	3	0.29	90	ul	3.2	9.5501	3.802	4.7864	3.802	4.2659	2.6916	3.02	2.6916	3.802	3.02
Sub3	2014-08-02	47	3	0.29	90	ul	3.26	2.3989	3.802	3.02	3.802	3.3885	3.802	2.6916	3.3885	3.02	3.3885
Sub3	2014-08-02	47	3	0.29	90	ul	3.52	4.7864	6.0257	3.802	4.2659	3.802	4.7864	3.3885	3.802	2.6916	3.02
Sub3	2014-08-02	47	3	0.29	90	ul	3.08	2.3989	3.02	2.3989	2.6916	2.138	2.6916	2.3989	3.802	3.3885	4.7864
Sub3	2014-08-02	47	3	0.29	90	ul	3.66	3.02	6.0257	4.2659	4.7864	3.802	4.2659	3.02	3.802	3.3885	3.802
Sub3	2014-08-02	47	3	0.29	90	ul	4.18	1.5136	7.5859	4.7864	5.3704	4.7864	5.3704	3.802	4.2659	3.3885	3.802
Sub3	2014-08-02	47	3	0.29	90	ul	2.85	9.5501	3.02	3.802	2.3989	3.02	2.6916	3.3885	2.3989	3.02	2.6916
Sub3	2014-08-03	47	3	0.29	90	ul	4.61	9.5501	3.802	4.7864	3.802	5.3704	4.2659	4.7864	4.2659	4.7864	4.2659
Sub3	2014-08-03	47	3	0.29	90	ul	4.7	4.7864	6.0257	4.7864	6.0257	4.7864	5.3704	4.7864	6.0257	3.3885	4.2659
Sub3	2014-08-03	47	3	0.29	90	ul	3.8	4.7864	6.0257	4.7864	5.3704	3.3885	3.802	3.3885	3.802	3.3885	5.3704
Sub3	2014-08-03	47	3	0.29	90	ul	2.85	1.9055	3.802	3.02	3.3885	2.3989	3.02	2.6916	3.3885	2.6916	3.02
Sub3	2014-08-03	47	3	0.29	90	ul	2.85	1.9055	3.802	3.02	3.3885	2.6916	3.02	2.6916	3.02	2.6916	3.02
Sub3	2014-08-03	47	3	0.29	90	ul	2.96	4.7864	6.0257	3.3885	3.802	3.3885	3.802	3.3885	3.802	1.9055	2.138
Sub3	2014-08-03	47	3	0.29	90	ul	3.32	3.02	4.7864	2.3989	3.02	1.9055	4.2659	3.802	5.3704	2.6916	3.02
Sub3	2014-08-03	47	3	0.29	90	ul	3.73	4.7864	6.0257	3.3885	3.802	3.3885	3.802	2.6916	4.7864	3.802	4.2659
Sub3	2014-08-03	47	3	0.29	90	ul	3.52	2.3989	3.802	3.02	3.3885	3.02	3.3885	3.02	4.7864	3.3885	3.802
Sub3	2014-08-03	47	3	0.29	90	ul	4.79	9.5501	3.802	4.7864	4.2659	6.0257	5.3704	6.0257	3.802	4.2659	3.802
Sub3	2014-08-03	47	3	0.29	90	ul	2.1	9.5501	2.3989	3.02	2.138	2.6916	1.9055	2.3989	1.6983	2.138	1.9055
Sub3	2014-08-03	47	3	0.29	90	ul	4.52	4.7864	7.5859	4.7864	5.3704	4.2659	6.0257	4.2659	4.7864	3.802	4.2659
Sub3	2014-08-03	47	3	0.29	90	ul	2.49	3.802	4.7864	3.3885	3.802	1.9055	2.138	1.9055	3.3885	2.6916	3.3885
Sub3	2014-08-03	47	3	0.29	90	ul	3.95	4.7864	6.0257	3.3885	4.2659	3.02	4.2659	3.802	4.2659	3.802	4.7864
Sub3	2014-08-03	47	3	0.29	90	ul	2.02	1.9055	2.3989	1.6983	2.3989	1.9055	2.138	1.9055	2.138	1.9055	2.138
Sub3	2014-08-03	47	3	0.29	90	ul	4.43	9.5501	4.7864	6.0257	4.2659	4.7864	4.2659	4.7864	4.2659	5.3704	3.3885
Sub3	2014-08-04	47	3	0.29	90	ul	3.45	2.3989	3.802	2.3989	2.6916	2.3989	3.3885	3.02	3.802	3.3885	5.3704
Sub3	2014-08-04	47	3	0.29	90	ul	3.59	9.5501	4.7864	6.7609	2.6916	3.3885	3.02	4.7864	3.802	4.2659	2.6916
Sub3	2014-08-04	47	3	0.29	90	ul	2.96	4.7864	6.0257	3.802	4.2659	2.138	3.3885	2.6916	3.3885	3.02	3.3885
Sub3	2014-08-04	47	3	0.29	90	ul	4.18	4.7864	6.0257	4.2659	4.7864	4.2659	4.7864	3.802	5.3704	3.3885	3.802
Sub3	2014-08-04	47	3	0.29	90	ul	3.8	6.0257	7.5859	4.7864	5.3704	3.3885	4.2659	2.6916	3.802	3.3885	6.0257
Sub3	2014-08-04	47	3	0.29	90	ul	2.26	2.3989	3.02	2.3989	3.802	2.138	2.3989	2.138	2.3989	2.138	2.3989
Sub3	2014-08-04	47	3	0.29	90	ul	3.2	3.802	4.7864	3.02	3.3885	3.02	3.802	3.02	3.802	2.6916	3.02
Sub3	2014-08-04	47	3	0.29	90	ul	2.31	3.02	3.802	3.02	3.3885	2.3989	2.6916	2.138	2.3989	1.9055	2.3989
Sub3	2014-08-04	47	3	0.29	90	ul	4.35	6.0257	7.5859	6.0257	7.5859	4.2659	4.7864	3.3885	4.7864	4.2659	4.7864
Sub3	2014-08-04	47	3	0.29	90	ul	2.49	1.9055	3.802	2.6916	3.02	2.138	2.6916	2.3989	2.6916	2.3989	2.6916
Sub3	2014-08-04	47	3	0.29	90	ul	4.88	6.0257	7.5859	4.7864	5.3704	4.2659	4.7864	4.2659	6.0257	4.7864	5.3704
Sub3	2014-08-04	47	3	0.29	90	ul	4.18	3.802	6.0257	4.7864	5.3704	4.2659	4.7864	4.2659	4.7864	3.3885	3.802
Sub3	2014-08-04	47	3	0.29	90	ul	4.61	4.7864	6.0257	4.2659	4.7864	4.2659	6.0257	4.7864	5.3704	3.3885	4.2659
Sub3	2014-08-04	47	3	0.29	90	ul	4.18	4.7864	6.0257	4.2659	5.3704	4.2659	4.7864	4.2659	4.7864	3.02	4.2659
Sub3	2014-08-04	47	3	0.29	90	ul	4.43	12.0228	4.7864	6.0257	4.7864	5.3704	3.3885	4.7864	4.2659	4.7864	4.2659
Sub3	2014-08-04	47	3	0.29	90	ul	5.58	3.02	4.7864	3.802	6.7609	6.0257	6.7609	4.7864	6.0257	4.7864	5.3704
Sub3	2014-08-05	47	3	0.29	90	ul	4.61	9.5501	4.7864	6.0257	5.3704	6.0257	4.2659	6.0257	3.802	4.2659	3.802
Sub3	2014-08-05	47	3	0.29	90	ul	3.14	3.802	4.7864	3.3885	3.802	3.3885	3.802	2.6916	3.02	2.6916	3.3885
Sub3	2014-08-05	47	3	0.29	90	ul	5.07	3.802	6.0257	4.2659	4.7864	3.02	6.7609	6.0257	6.7609	4.2659	4.7864
Sub3	2014-08-05	47	3	0.29	90	ul	2.85	4.7864	6.0257	3.3885	3.802	2.6916	3.3885	2.6916	3.02	2.3989	3.02
Sub3	2014-08-05	47	3	0.29	90	ul	4.43	3.02	3.802	3.02	5.3704	4.2659	5.3704	4.2659	4.7864	3.802	4.2659
Sub3	2014-08-05	47	3	0.29	90	dr	5.91	6.0257	12.0228	6.0257	9.5501	6.7609	8.5115	7.5859	9.5501	3.02	3.3885
Sub3	2014-08-05	47	3	0.29	90	dr	6.89	9.5501	7.5859	10.7154	7.5859	8.5115	6.0257	6.7609	6.0257	7.5859	6.7609
Sub3	2014-08-05	47	3	0.29	90	dr	5.27	6.0257	7.5859	5.3704	6.0257	5.3704	6.0257	4.7864	5.3704	4.7864	5.3704
Sub3	2014-08-05	47	3	0.29	90	dr	3.2	3.02	3.802	3.02	3.802	3.02	3.3885	1.9055	4.2659	3.02	4.2659
Sub3	2014-08-05	47	3	0.29	90	dr	4.52	9.5501	4.7864	6.7609	3.802	4.7864	4.2659	4.7864	4.2659	4.7864	4.2659
Sub4	2014-08-01	47	3	0.29	90	dr	9.55	13.4898	10.7154	13.4898	7.5859	9.5501	8.5115	10.7154	9.5501	10.7154	8.5115
Sub4	2014-08-01	47	3	0.29	90	dr	6.03	6.7609	13.4898	10.7154	12.0228	6.0257	7.5859	6.0257	7.5859	4.2659	5.3704
Sub4	2014-08-01	47	3	0.29	90	dr	6.14	8.5115	10.7154	7.5859	8.5115	6.0257	6.7609	4.7864	6.7609	6.0257	6.7609
Sub4	2014-08-01	47	3	0.29	90	dr	2.91	2.6916	3.3885	2.6916	3.02	2.6916	3.02	2.3989	3.02	2.3989	4.2659
Sub4	2014-08-01	47	3	0.29	90	dr	4.79	3.3885	4.2659	3.3885	4.2659	3.802	4.2659	3.3885	6.0257	5.3704	6.7609
Sub4	2014-08-01	47	3	0.29	90	dr	6.03	6.7609	8.5115	6.7609	7.5859	6.7609	7.5859	4.7864	6.0257	5.3704	6.0257
Sub4	2014-08-01	47	3	0.29	90	ul	6.51	6.7609	13.4898	9.5501	10.7154	8.5115	13.4898	4.2659	5.3704	4.7864	6.0257
Sub4	2014-08-01	47	3	0.29	90	ul	6.14	6.7609	8.5115	6.0257	6.7609	5.3704	6.0257	5.3704	7.5859	4.7864	8.5115
Sub4	2014-08-01	47	3	0.29	90	ul	5.27	5.3704	8.5115	4.7864	5.3704	4.7864	7.5859	4.7864	6.0257	4.2659	4.7864
Sub4	2014-08-01	47	3	0.29	90	ul	6.76	8.5115	10.7154	8.5115	9.5501	6.7609	7.5859	6.7609	7.5859	5.3704	6.7609
Sub4	2014-08-01	47	3	0.29	90	ul	6.38	13.4898	6.7609	8.5115	7.5859	10.7154	7.5859	9.5501	4.2659	4.7864	4.2659
Sub4	2014-08-01	47	3	0.29	90	ul	7.73	6.7609	10.7154	6.0257	8.5115	7.5859	9.5501	7.5859	9.5501	6.0257	6.7609
Sub4	2014-08-03	47	3	0.29	90	dr	6.03	7.5859	9.5501	7.5859	8.5115	5.3704	6.7609	6.0257	6.7609	5.3704	6.0257
Sub4	2014-08-03	47	3	0.29	90	dr	4.43	2.3989	3.02	2.3989	4.2659	3.802	4.7864	3.802	5.3704	4.2659	4.7864
Sub4	2014-08-03	47	3	0.29	90	dr	4.7	4.7864	6.0257	4.2659	6.0257	4.2659	4.7864	4.2659	4.7864	4.2659	6.0257
Sub4	2014-08-03	47	3	0.29	90	dr	4.88	3.02	3.802	3.02	4.2659	3.802	6.0257	5.3704	6.0257	3.802	4.7864
Sub4	2014-08-03	47	3	0.29	90	dr	6.76	12.0228	4.7864	6.0257	5.3704	8.5115	6.7609	10.7154	4.7864	6.0257	5.3704
Sub4	2014-08-03	47	3	0.29	90	dr	5.69	3.802	4.7864	3.802	5.3704	4.7864	6.0257	5.3704	6.0257	5.3704	6.7609
Sub4	2014-08-03	47	3	0.29	90	dr	4.43	7.5859	9.5501	6.7609	7.5859	3.3885	4.7864	4.2659	4.7864	4.2659	5.3704
Sub4	2014-08-03	47	3	0.29	90	dr	5.27	7.5859	9.5501	6.7609	7.5859	6.0257	6.7609	3.3885	6.0257	4.7864	5.3704
Sub4	2014-08-03	47	3	0.29	90	dr	4.88	7.5859	9.5501	6.0257	6.7609	5.3704	6.0257	4.7864	6.0257	3.3885	4.2659
Sub4	2014-08-03	47	3	0.29	90	dr	6.89	7.5859	12.0228	8.5115	9.5501	7.5859	8.5115	7.5859	8.5115	4.7864	5.3704
Sub4	2014-08-03	47	3	0.29	90	dr	5.69	6.0257	7.5859	6.0257	6.7609	4.7864	6.0257	5.3704	6.0257	5.3704	6.7609
Sub4	2014-08-03	47	3	0.29	90	dr	4.43	4.7864	6.0257	3.802	4.7864	4.2659	5.3704	4.2659	4.7864	3.802	4.2659
Sub4	2014-08-03	47	3	0.29	90	dr	2.96	3.802	6.0257	3.802	4.2659	2.6916	3.02	2.3989	3.02	2.6916	4.2659
Sub4	2014-08-03	47	3	0.29	90	dr	4.35	6.0257	9.5501	4.2659	4.7864	3.3885	5.3704	4.7864	5.3704	3.3885	4.2659
Sub4	2014-08-03	47	3	0.29	90	dr	3.45	4.7864	6.0257	3.02	4.2659	3.3885	3.802	3.3885	3.802	3.02	3.3885
Sub4	2014-08-03	47	3	0.29	90	dr	3.59	3.02	4.7864	3.02	3.3885	2.6916	3.3885	3.02	4.2659	3.3885	5.3704
Sub4	2014-08-04	47	3	0.29	90	dr	8.84	7.5859	12.0228	8.5115	9.5501	8.5115	9.5501	7.5859	9.5501	7.5859	10.7154
Sub4	2014-08-04	47	3	0.29	90	dr	5.47	7.5859	9.5501	6.0257	6.7609	6.0257	6.7609	5.3704	6.0257	4.2659	4.7864
Sub4	2014-08-04	47	3	0.29	90	dr	7.44	4.7864	6.0257	4.7864	6.7609	6.0257	7.5859	6.7609	8.5115	7.5859	8.5115
Sub4	2014-08-04	47	3	0.29	90	dr	4.43	3.802	6.0257	3.802	4.7864	3.802	4.7864	4.2659	4.7864	4.2659	4.7864
Sub4	2014-08-04	47	3	0.29	90	dr	5.8	6.0257	7.5859	5.3704	6.0257	5.3704	6.0257	5.3704	6.0257	5.3704	6.7609
Sub4	2014-08-04	47	3	0.29	90	dr	5.69	7.5859	12.0228	6.7609	7.5859	6.7609	7.5859	5.3704	6.0257	3.02	6.7609
Sub4	2014-08-04	47	3	0.29	90	dr	4.88	6.0257	9.5501	7.5859	8.5115	6.7609	7.5859	3.802	4.2659	3.802	4.2659
Sub4	2014-08-04	47	3	0.29	90	dr	7.3	12.0228	6.0257	7.5859	6.7609	7.5859	6.7609	8.5115	7.5859	8.5115	5.3704
Sub4	2014-08-04	47	3	0.29	90	dr	2.4	2.3989	3.02	2.138	2.3989	1.9055	2.3989	2.138	2.6916	2.3989	3.02
Sub4	2014-08-04	47	3	0.29	90	dr	4.18	3.802	6.0257	4.7864	5.3704	3.802	6.0257	3.3885	4.2659	3.802	4.2659
Sub4	2014-08-04	47	3	0.29	90	dr	4.27	6.0257	9.5501	3.3885	4.2659	3.802	4.7864	4.2659	4.7864	3.802	4.2659
Sub4	2014-08-04	47	3	0.29	90	dr	3.52	7.5859	9.5501	4.7864	5.3704	3.802	4.2659	3.3885	3.802	2.6916	3.3885
Sub4	2014-08-04	47	3	0.29	90	dr	3.2	3.02	6.0257	3.02	3.3885	2.6916	3.3885	3.02	3.3885	3.02	3.802
Sub4	2014-08-04	47	3	0.29	90	dr	3.73	7.5859	9.5501	4.7864	6.7609	3.3885	3.802	3.3885	4.7864	3.02	4.2659
Sub4	2014-08-04	47	3	0.29	90	dr	3.66	4.7864	9.5501	7.5859	8.5115	3.3885	3.802	3.3885	4.2659	3.3885	3.802
Sub4	2014-08-05	47	3	0.29	90	dr	5.8	6.0257	9.5501	6.0257	6.7609	4.2659	6.7609	6.0257	6.7609	5.3704	6.0257
Sub4	2014-08-05	47	3	0.29	90	dr	6.26	7.5859	9.5501	6.0257	8.5115	7.5859	8.5115	5.3704	6.0257	4.2659	6.7609
Sub4	2014-08-05	47	3	0.29	90	dr	4.18	4.7864	6.0257	4.7864	6.0257	4.2659	6.0257	3.02	4.2659	3.802	4.2659
Sub4	2014-08-05	47	3	0.29	90	dr	3.2	7.5859	9.5501	4.7864	6.0257	3.02	3.3885	3.02	3.3885	2.6916	3.802
Sub4	2014-08-05	47	3	0.29	90	dr	3.88	7.5859	9.5501	5.3704	6.7609	3.3885	4.7864	3.802	4.2659	3.3885	3.802
Sub4	2014-08-05	47	3	0.29	90	dr	4.35	6.0257	7.5859	5.3704	6.0257	5.3704	6.0257	2.6916	4.2659	3.802	4.7864
Sub4	2014-08-05	47	3	0.29	90	dr	3.39	4.7864	9.5501	2.6916	3.02	2.3989	3.3885	3.02	3.802	3.3885	4.7864
Sub4	2014-08-05	47	3	0.29	90	dr	3.45	3.802	4.7864	3.802	4.2659	3.802	4.2659	3.02	3.3885	3.02	3.3885
Sub4	2014-08-05	47	3	0.29	90	dr	3.66	7.5859	9.5501	3.3885	4.2659	3.02	4.2659	3.802	4.2659	3.02	3.802
Sub4	2014-08-05	47	3	0.29	90	dr	3.88	4.7864	6.0257	4.2659	4.7864	4.2659	5.3704	3.3885	4.2659	3.02	3.3885
Sub4	2014-08-05	47	3	0.29	90	dr	2.74	3.02	4.7864	3.802	4.2659	2.6916	3.02	2.6916	3.02	2.3989	2.6916
Sub4	2014-08-05	47	3	0.29	90	dr	3.32	4.7864	6.0257	4.7864	5.3704	3.3885	3.802	3.02	3.3885	3.02	3.3885
Sub4	2014-08-05	47	3	0.29	90	dr	3.88	7.5859	9.5501	4.7864	6.0257	5.3704	6.0257	2.6916	3.3885	3.02	3.802
Sub4	2014-08-05	47	3	0.29	90	dr	3.26	3.02	6.0257	3.3885	3.802	3.02	3.3885	3.02	3.802	3.02	3.3885
Sub4	2014-08-05	47	3	0.29	90	dr	3.02	3.802	4.7864	3.02	3.3885	2.3989	3.02	2.6916	3.802	3.02	3.3885
Sub4	2014-08-05	47	3	0.29	90	dr	4.03	3.802	4.7864	3.02	3.802	3.3885	4.2659	3.802	4.2659	3.802	4.7864
Sub4	2014-08-06	47	3	0.29	90	dr	7.03	7.5859	12.0228	6.7609	7.5859	6.0257	7.5859	6.7609	7.5859	6.7609	7.5859
Sub4	2014-08-06	47	3	0.29	90	dr	5.58	6.0257	7.5859	6.0257	6.7609	5.3704	6.7609	4.7864	6.0257	4.7864	6.0257
Sub4	2014-08-06	47	3	0.29	90	dr	5.27	3.02	9.5501	5.3704	6.7609	6.0257	6.7609	5.3704	6.0257	3.802	4.2659
Sub4	2014-08-06	47	3	0.29	90	dr	3.26	3.802	4.7864	3.3885	3.802	3.3885	3.802	2.138	3.802	3.02	3.802
Sub4	2014-08-06	47	3	0.29	90	dr	3.59	4.7864	6.0257	3.802	4.2659	3.3885	4.7864	3.802	4.2659	2.3989	3.3885
Sub4	2014-08-06	47	3	0.29	90	dr	6.26	7.5859	9.5501	6.7609	7.5859	6.0257	6.7609	6.0257	6.7609	5.3704	6.7609
Sub4	2014-08-06	47	3	0.29	90	dr	3.59	2.3989	3.802	3.02	3.802	3.02	4.2659	3.3885	3.802	3.3885	3.802
Sub4	2014-08-06	47	3	0.29	90	dr	4.88	7.5859	9.5501	4.7864	5.3704	4.7864	5.3704	4.7864	5.3704	4.2659	4.7864
Sub4	2014-08-06	47	3	0.29	90	dr	7.3	4.7864	9.5501	6.7609	7.5859	6.7609	8.5115	6.0257	8.5115	6.7609	7.5859
Sub4	2014-08-06	47	3	0.29	90	dr	5.07	4.7864	6.0257	4.7864	5.3704	4.7864	6.0257	5.3704	6.0257	3.802	4.7864
Sub4	2014-08-06	47	3	0.29	90	dr	3.45	3.802	4.7864	3.802	4.7864	3.3885	3.802	3.3885	3.802	3.02	3.3885
Sub4	2014-08-06	47	3	0.29	90	dr	3.08	4.7864	6.0257	4.2659	5.3704	2.3989	2.6916	2.3989	3.802	3.3885	4.2659
Sub4	2014-08-06	47	3	0.29	90	dr	5.07	3.802	4.7864	3.802	5.3704	4.2659	6.0257	4.7864	5.3704	4.7864	5.3704
Sub4	2014-08-06	47	3	0.29	90	dr	4.43	2.3989	6.0257	4.7864	6.7609	3.3885	4.2659	3.802	5.3704	4.7864	5.3704
Sub4	2014-08-06	47	3	0.29	90	dr	3.59	3.802	4.7864	3.3885	3.802	2.6916	3.3885	3.02	4.2659	3.802	4.7864
Sub4	2014-08-06	47	3	0.29	90	dr	3.45	6.0257	7.5859	5.3704	6.0257	5.3704	6.0257	2.3989	2.6916	2.3989	3.3885
Sub4	2014-08-07	47	3	0.29	90	dr	7.03	7.5859	12.0228	8.5115	9.5501	6.7609	8.5115	7.5859	8.5115	5.3704	6.0257
Sub4	2014-08-07	47	3	0.29	90	dr	3.26	6.0257	7.5859	4.2659	5.3704	4.2659	6.0257	2.3989	3.02	2.3989	2.6916
Sub4	2014-08-07	47	3	0.29	90	dr	4.35	7.5859	9.5501	7.5859	8.5115	5.3704	6.7609	3.3885	4.2659	3.3885	3.802
Sub4	2014-08-07	47	3	0.29	90	dr	3.45	3.02	3.802	3.02	3.3885	2.3989	3.802	3.3885	4.2659	3.3885	3.802
Sub4	2014-08-07	47	3	0.29	90	dr	4.79	6.0257	7.5859	4.7864	5.3704	4.2659	4.7864	4.2659	5.3704	4.7864	5.3704
Sub4	2014-08-07	47	3	0.29	90	dr	3.59	7.5859	9.5501	6.0257	6.7609	3.02	3.802	3.3885	3.802	3.3885	4.2659
Sub4	2014-08-07	47	3	0.29	90	dr	3.26	3.02	3.802	3.02	3.3885	3.02	3.802	3.02	3.3885	2.6916	3.802
Sub4	2014-08-07	47	3	0.29	90	dr	3.8	4.7864	6.0257	4.7864	5.3704	2.6916	4.7864	3.802	4.2659	3.3885	4.2659
Sub4	2014-08-07	47	3	0.29	90	dr	6.14	7.5859	12.0228	5.3704	6.0257	5.3704	6.7609	5.3704	6.7609	6.0257	6.7609
Sub4	2014-08-07	47	3	0.29	90	dr	6.63	6.0257	7.5859	5.3704	6.0257	5.3704	6.7609	6.0257	7.5859	6.0257	8.5115
Sub4	2014-08-07	47	3	0.29	90	dr	5.8	12.0228	6.0257	8.5115	6.0257	6.7609	5.3704	6.0257	5.3704	6.0257	5.3704
Sub4	2014-08-07	47	3	0.29	90	dr	4.79	12.0228	7.5859	9.5501	6.0257	6.7609	4.2659	4.7864	3.802	5.3704	4.2659
Sub4	2014-08-07	47	3	0.29	90	dr	3.45	3.02	4.7864	3.02	3.3885	3.02	3.802	3.3885	3.802	2.3989	4.7864
Sub4	2014-08-07	47	3	0.29	90	dr	4.97	6.0257	7.5859	6.0257	6.7609	4.7864	5.3704	4.7864	6.0257	4.2659	4.7864
Sub4	2014-08-07	47	3	0.29	90	dr	6.38	7.5859	9.5501	5.3704	6.0257	5.3704	6.0257	5.3704	7.5859	6.7609	7.5859
Sub4	2014-08-07	47	3	0.29	90	dr	2.59	6.0257	7.5859	3.802	4.2659	2.3989	3.02	2.3989	2.6916	2.3989	2.6916
Sub4	2014-08-08	47	3	0.29	90	dr	5.47	3.802	4.7864	3.802	6.0257	5.3704	6.0257	5.3704	6.0257	4.7864	5.3704
Sub4	2014-08-08	47	3	0.29	90	dr	5.17	6.0257	7.5859	4.7864	6.0257	5.3704	6.0257	5.3704	6.7609	3.802	4.2659
Sub4	2014-08-08	47	3	0.29	90	dr	2.22	2.3989	3.02	2.138	2.3989	1.9055	2.6916	1.9055	2.3989	2.138	2.3989
Sub4	2014-08-08	47	3	0.29	90	dr	7.73	7.5859	9.5501	7.5859	9.5501	7.5859	8.5115	7.5859	8.5115	6.7609	7.5859
Sub4	2014-08-08	47	3	0.29	90	dr	6.26	4.7864	6.0257	4.7864	7.5859	6.7609	7.5859	5.3704	6.0257	5.3704	6.7609
Sub4	2014-08-08	47	3	0.29	90	dr	4.27	3.802	4.7864	3.802	4.2659	3.802	4.2659	3.802	4.7864	4.2659	4.7864
Sub4	2014-08-08	47	3	0.29	90	dr	4.35	6.0257	7.5859	4.2659	4.7864	3.802	4.2659	3.802	4.7864	4.2659	5.3704
Sub4	2014-08-08	47	3	0.29	90	ul	11.79	7.5859	15.1358	12.0228	13.4898	12.0228	13.4898	10.7154	12.0228	10.7154	12.0228
Sub4	2014-08-08	47	3	0.29	90	ul	5.91	7.5859	9.5501	6.7609	7.5859	4.2659	6.0257	5.3704	7.5859	5.3704	7.5859
Sub4	2014-08-08	47	3	0.29	90	ul	5.37	12.0228	4.7864	6.0257	5.3704	6.0257	4.2659	6.0257	5.3704	6.0257	4.7864
Sub4	2014-08-08	47	3	0.29	90	ul	7.44	7.5859	15.1358	8.5115	9.5501	6.7609	7.5859	6.7609	9.5501	6.7609	7.5859
Sub4	2014-08-08	47	3	0.29	90	ul	7.16	12.0228	6.0257	7.5859	6.7609	8.5115	6.7609	7.5859	6.0257	7.5859	6.7609
Sub4	2014-08-08	47	3	0.29	90	ul	3.8	6.0257	9.5501	4.2659	4.7864	3.3885	4.2659	3.802	4.2659	3.3885	3.802
Sub5	2015-01-04	47	3	0.29	90	dl	3.95	9.5501	3.02	4.2659	3.802	4.2659	3.802	4.7864	3.802	4.2659	3.02
Sub5	2015-01-04	47	3	0.29	90	dl	4.88	4.7864	6.0257	4.7864	5.3704	4.2659	4.7864	4.2659	5.3704	4.7864	6.0257
Sub5	2015-01-04	47	3	0.29	90	dl	4.18	3.802	4.7864	3.802	4.7864	3.3885	4.2659	3.3885	4.7864	4.2659	5.3704
Sub5	2015-01-04	47	3	0.29	90	dl	3.95	6.0257	7.5859	4.2659	4.7864	3.3885	4.2659	3.3885	3.802	3.3885	6.0257
Sub5	2015-01-04	47	3	0.29	90	dl	6.63	3.802	7.5859	6.0257	7.5859	6.7609	7.5859	6.7609	7.5859	5.3704	6.0257
Sub5	2015-01-04	47	3	0.29	90	ur	4.43	3.802	4.7864	3.802	4.2659	3.802	4.7864	3.802	5.3704	4.2659	4.7864
Sub5	2015-01-04	47	3	0.29	90	ur	5.58	3.802	4.7864	3.3885	6.0257	4.7864	5.3704	4.7864	6.0257	5.3704	7.5859
Sub5	2015-01-04	47	3	0.29	90	ur	4.7	4.7864	6.0257	4.7864	5.3704	4.2659	4.7864	4.2659	4.7864	4.2659	6.0257
Sub5	2015-01-04	47	3	0.29	90	ur	4.27	3.802	4.7864	3.802	4.7864	4.2659	4.7864	3.3885	4.2659	3.802	5.3704
Sub5	2015-01-04	47	3	0.29	90	ur	5.69	4.7864	6.0257	4.7864	5.3704	4.7864	6.7609	4.2659	7.5859	5.3704	6.0257
Sub5	2015-01-05	47	3	0.29	90	dl	6.38	9.5501	7.5859	10.7154	9.5501	10.7154	4.2659	6.7609	6.0257	6.7609	5.3704
Sub5	2015-01-05	47	3	0.29	90	dl	7.16	6.0257	7.5859	6.0257	7.5859	6.7609	7.5859	6.7609	7.5859	6.7609	7.5859
Sub5	2015-01-05	47	3	0.29	90	dl	5.91	6.0257	7.5859	6.0257	6.7609	4.7864	6.7609	6.0257	6.7609	5.3704	6.0257
Sub5	2015-01-05	47	3	0.29	90	dl	2.85	4.7864	6.0257	3.802	6.0257	2.6916	3.3885	2.3989	3.02	2.6916	3.02
Sub5	2015-01-05	47	3	0.29	90	dl	5.27	3.802	7.5859	6.0257	6.7609	5.3704	6.7609	5.3704	6.0257	3.802	4.7864
Sub5	2015-01-05	47	3	0.29	90	dl	6.14	12.0228	9.5501	12.0228	8.5115	9.5501	6.7609	7.5859	4.7864	6.0257	3.802
Sub5	2015-01-05	47	3	0.29	90	dl	4.7	4.7864	6.0257	4.7864	6.7609	4.7864	5.3704	3.3885	4.7864	4.2659	6.0257
Sub5	2015-01-05	47	3	0.29	90	dl	3.59	4.7864	6.0257	3.3885	4.2659	3.802	4.2659	3.802	4.2659	2.6916	3.02
Sub5	2015-01-05	47	3	0.29	90	dl	3.8	9.5501	3.02	3.802	3.3885	3.802	3.3885	4.7864	3.3885	4.2659	3.3885
Sub5	2015-01-05	47	3	0.29	90	dl	4.18	3.802	4.7864	3.802	4.2659	3.802	4.7864	3.802	4.7864	3.802	4.2659
Sub5	2015-01-05	47	3	0.29	90	dl	4.35	4.7864	6.0257	4.7864	5.3704	3.802	4.7864	3.802	4.7864	4.2659	4.7864
Sub5	2015-01-05	47	3	0.29	90	dl	4.35	9.5501	6.0257	7.5859	6.7609	7.5859	4.7864	5.3704	3.02	4.2659	2.6916
Sub5	2015-01-05	47	3	0.29	90	dl	4.35	3.802	4.7864	3.02	4.2659	3.802	4.2659	3.802	5.3704	4.2659	4.7864
Sub5	2015-01-05	47	3	0.29	90	dl	3.88	6.0257	9.5501	5.3704	6.0257	4.7864	5.3704	3.3885	3.802	3.02	3.3885
Sub5	2015-01-05	47	3	0.29	90	dl	5.27	3.02	3.802	3.02	5.3704	4.7864	5.3704	4.7864	6.7609	4.7864	5.3704
Sub5	2015-01-06	47	3	0.29	90	dl	5.17	4.7864	7.5859	6.0257	6.7609	5.3704	6.0257	4.7864	6.7609	3.802	4.7864
Sub5	2015-01-06	47	3	0.29	90	dl	5.27	4.7864	6.0257	4.7864	6.7609	3.802	6.7609	6.0257	6.7609	4.2659	4.7864
Sub5	2015-01-06	47	3	0.29	90	dl	5.07	6.0257	9.5501	7.5859	8.5115	5.3704	7.5859	4.2659	4.7864	4.2659	4.7864
Sub5	2015-01-06	47	3	0.29	90	dl	6.76	9.5501	6.0257	7.5859	5.3704	7.5859	6.7609	7.5859	6.0257	6.7609	6.0257
Sub5	2015-01-06	47	3	0.29	90	dl	6.03	6.0257	7.5859	6.0257	6.7609	6.0257	6.7609	5.3704	6.0257	5.3704	6.7609
Sub5	2015-01-06	47	3	0.29	90	dl	3.45	9.5501	3.02	4.2659	3.3885	3.802	3.3885	3.802	3.02	3.802	3.02
Sub5	2015-01-06	47	3	0.29	90	dl	3.95	6.0257	7.5859	4.2659	4.7864	4.2659	4.7864	3.3885	3.802	3.3885	4.2659
Sub5	2015-01-06	47	3	0.29	90	dl	3.32	3.02	3.802	2.6916	4.2659	3.802	4.7864	2.6916	3.3885	2.6916	3.02
Sub5	2015-01-06	47	3	0.29	90	dl	6.38	6.0257	7.5859	6.0257	8.5115	6.0257	6.7609	6.0257	6.7609	6.0257	6.7609
Sub5	2015-01-06	47	3	0.29	90	dl	4.11	6.0257	7.5859	5.3704	6.7609	4.7864	5.3704	3.3885	3.802	3.3885	4.2659
Sub5	2015-01-06	47	3	0.29	90	dl	4.35	3.802	4.7864	3.802	4.7864	4.2659	4.7864	4.2659	4.7864	3.802	4.2659
Sub5	2015-01-06	47	3	0.29	90	dl	5.8	9.5501	6.0257	7.5859	5.3704	7.5859	4.7864	6.0257	5.3704	6.7609	4.7864
Sub5	2015-01-06	47	3	0.29	90	dl	6.89	4.7864	9.5501	7.5859	9.5501	6.7609	8.5115	6.7609	8.5115	5.3704	6.0257
Sub5	2015-01-06	47	3	0.29	90	dl	6.38	6.0257	7.5859	6.0257	7.5859	6.0257	6.7609	6.0257	6.7609	6.0257	6.7609
Sub5	2015-01-06	47	3	0.29	90	dl	3.66	3.02	4.7864	3.3885	3.802	3.3885	3.802	3.3885	3.802	3.02	4.7864
Sub5	2015-01-07	47	3	0.29	90	dl	3.02	9.5501	3.02	4.2659	3.802	4.2659	3.02	3.3885	2.3989	3.02	2.3989
Sub5	2015-01-07	47	3	0.29	90	dl	5.17	6.0257	7.5859	4.2659	4.7864	4.2659	6.7609	4.7864	6.7609	4.2659	4.7864
Sub5	2015-01-07	47	3	0.29	90	dl	3.88	3.802	6.0257	4.2659	4.7864	3.3885	3.802	3.02	4.7864	3.802	4.7864
Sub5	2015-01-07	47	3	0.29	90	dl	4.61	9.5501	4.7864	6.0257	4.7864	5.3704	4.2659	5.3704	3.802	4.7864	4.2659
Sub5	2015-01-07	47	3	0.29	90	dl	3.2	6.0257	7.5859	4.2659	4.7864	3.802	4.2659	2.6916	3.02	2.6916	3.02
Sub5	2015-01-07	47	3	0.29	90	dl	4.43	9.5501	3.802	4.7864	4.2659	4.7864	3.802	4.7864	4.2659	4.7864	4.2659
Sub5	2015-01-07	47	3	0.29	90	dl	4.27	4.7864	6.0257	4.2659	4.7864	4.2659	5.3704	3.802	4.2659	3.802	4.2659
Sub5	2015-01-07	47	3	0.29	90	dl	4.18	9.5501	6.0257	7.5859	4.2659	4.7864	3.802	4.7864	3.802	4.2659	3.802
Sub5	2015-01-07	47	3	0.29	90	dl	2.59	4.7864	7.5859	2.6916	3.3885	2.6916	3.02	2.138	2.6916	2.3989	2.6916
Sub5	2015-01-07	47	3	0.29	90	dl	6.03	9.5501	6.0257	7.5859	6.7609	7.5859	6.0257	6.7609	5.3704	6.0257	4.7864
Sub5	2015-01-07	47	3	0.29	90	dl	6.26	4.7864	9.5501	6.0257	6.7609	5.3704	6.7609	6.0257	6.7609	6.0257	6.7609
Sub5	2015-01-07	47	3	0.29	90	dl	2.91	4.7864	6.0257	3.02	3.3885	3.02	3.3885	2.3989	3.02	2.6916	3.02
Sub5	2015-01-07	47	3	0.29	90	dl	4.88	4.7864	7.5859	5.3704	6.0257	5.3704	6.0257	3.802	5.3704	4.2659	4.7864
Sub5	2015-01-07	47	3	0.29	90	dl	3.45	2.3989	3.802	3.02	3.802	3.3885	4.2659	3.3885	3.802	2.6916	3.3885
Sub5	2015-01-07	47	3	0.29	90	dl	2.91	3.802	4.7864	3.802	4.7864	2.138	3.02	2.6916	3.3885	3.02	3.3885
Sub5	2015-01-08	47	3	0.29	90	dl	3.73	4.7864	6.0257	3.802	4.2659	3.802	4.2659	3.3885	3.802	3.3885	3.802
Sub5	2015-01-08	47	3	0.29	90	dl	3.45	4.7864	7.5859	4.2659	4.7864	4.2659	5.3704	2.6916	3.02	2.6916	3.3885
Sub5	2015-01-08	47	3	0.29	90	dl	2.85	4.7864	6.0257	3.802	5.3704	3.802	4.2659	2.3989	2.6916	1.9055	2.6916
Sub5	2015-01-08	47	3	0.29	90	dl	3.95	9.5501	6.0257	7.5859	6.0257	6.7609	3.802	4.7864	3.02	3.802	2.6916
Sub5	2015-01-08	47	3	0.29	90	dl	6.76	6.0257	12.0228	8.5115	9.5501	7.5859	8.5115	5.3704	6.7609	6.0257	6.7609
Sub5	2015-01-08	47	3	0.29	90	dl	3.88	3.802	6.0257	4.2659	5.3704	4.2659	4.7864	3.3885	3.802	3.3885	3.802
Sub5	2015-01-08	47	3	0.29	90	dl	3.59	3.802	4.7864	3.02	4.7864	4.2659	4.7864	3.02	3.3885	3.02	3.3885
Sub5	2015-01-08	47	3	0.29	90	dl	4.11	4.7864	6.0257	4.7864	6.0257	5.3704	7.5859	3.02	3.3885	3.02	3.802
Sub5	2015-01-08	47	3	0.29	90	dl	2.02	1.9055	3.02	2.138	2.3989	2.138	2.3989	1.6983	2.3989	1.6983	1.9055
Sub5	2015-01-08	47	3	0.29	90	dl	2.26	2.3989	3.02	2.3989	2.6916	2.138	2.3989	2.138	2.3989	2.138	2.3989
Sub5	2015-01-08	47	3	0.29	90	dl	3.73	4.7864	6.0257	4.7864	5.3704	3.802	4.2659	3.3885	3.802	3.3885	3.802
Sub5	2015-01-08	47	3	0.29	90	dl	2.74	6.0257	7.5859	3.802	4.2659	3.3885	3.802	2.3989	2.6916	2.138	2.3989
Sub5	2015-01-08	47	3	0.29	90	dl	3.59	3.802	4.7864	3.802	4.2659	3.3885	3.802	3.02	4.2659	3.3885	3.802
Sub5	2015-01-08	47	3	0.29	90	dl	3.45	3.802	4.7864	3.802	4.2659	3.802	4.2659	3.02	3.3885	3.02	3.3885
Sub5	2015-01-08	47	3	0.29	90	dl	2.4	3.02	3.802	3.02	3.3885	2.138	2.3989	2.138	2.6916	2.3989	2.6916
Sub5	2015-01-09	47	3	0.29	90	dl	3.95	6.0257	7.5859	6.0257	6.7609	3.802	4.2659	3.02	4.2659	3.802	4.7864
Sub5	2015-01-09	47	3	0.29	90	dl	3.39	4.7864	6.0257	3.3885	3.802	3.02	3.802	3.3885	3.802	2.6916	3.802
Sub5	2015-01-09	47	3	0.29	90	dl	4.43	9.5501	6.0257	7.5859	5.3704	6.0257	4.2659	4.7864	3.802	4.2659	3.802
Sub5	2015-01-09	47	3	0.29	90	dl	5.91	6.0257	9.5501	6.0257	6.7609	6.0257	6.7609	6.0257	7.5859	4.2659	5.3704
Sub5	2015-01-09	47	3	0.29	90	dl	3.8	6.0257	9.5501	6.7609	7.5859	4.2659	5.3704	3.3885	3.802	3.02	3.3885
Sub5	2015-01-09	47	3	0.29	90	dl	5.27	9.5501	6.0257	7.5859	4.7864	5.3704	4.7864	6.0257	4.2659	6.0257	5.3704
Sub5	2015-01-09	47	3	0.29	90	dl	4.43	4.7864	6.0257	4.2659	6.0257	3.802	4.7864	4.2659	4.7864	4.2659	4.7864
Sub5	2015-01-09	47	3	0.29	90	dl	2.64	3.02	3.802	3.02	3.3885	3.02	3.3885	2.6916	3.02	1.9055	2.138
Sub5	2015-01-09	47	3	0.29	90	dl	2.96	2.3989	3.02	2.3989	2.6916	2.3989	3.02	2.6916	3.3885	3.02	3.3885
Sub5	2015-01-09	47	3	0.29	90	dl	6.38	9.5501	6.0257	8.5115	6.7609	8.5115	5.3704	6.7609	6.0257	6.7609	5.3704
Sub5	2015-01-09	47	3	0.29	90	dl	3.73	3.802	4.7864	3.802	4.7864	3.802	4.2659	3.802	4.2659	3.02	3.3885
Sub5	2015-01-09	47	3	0.29	90	dl	2.8	3.02	4.7864	3.3885	3.802	3.02	3.3885	2.3989	2.6916	2.3989	3.02
Sub5	2015-01-09	47	3	0.29	90	dl	2.64	3.02	3.802	2.3989	3.02	2.138	3.3885	2.138	2.6916	2.3989	3.3885
Sub5	2015-01-09	47	3	0.29	90	dl	3.32	6.0257	7.5859	3.3885	3.802	3.3885	3.802	3.02	3.3885	3.02	3.3885
Sub5	2015-01-09	47	3	0.29	90	dl	2.85	3.02	6.0257	3.802	4.7864	2.6916	3.02	2.6916	3.02	2.6916	3.02
Sub5	2015-01-10	47	3	0.29	90	dl	2.06	1.2023	1.9055	1.5136	3.3885	1.9055	2.138	1.9055	2.138	1.9055	2.3989
Sub5	2015-01-10	47	3	0.29	90	dl	3.95	6.0257	7.5859	3.3885	3.802	3.3885	3.802	3.02	4.7864	4.2659	4.7864
Sub5	2015-01-10	47	3	0.29	90	dl	4.03	3.802	4.7864	3.802	4.2659	3.802	4.7864	3.3885	4.2659	3.802	4.2659
Sub5	2015-01-10	47	3	0.29	90	dl	2.8	4.7864	6.0257	4.7864	5.3704	3.02	3.3885	2.138	3.3885	2.138	3.02
Sub5	2015-01-10	47	3	0.29	90	dl	3.52	3.802	4.7864	3.802	4.2659	3.02	3.802	3.3885	3.802	3.3885	3.802
Sub5	2015-01-10	47	3	0.29	90	ur	4.43	4.7864	7.5859	3.3885	3.802	2.6916	4.7864	4.2659	4.7864	3.3885	8.5115
Sub5	2015-01-10	47	3	0.29	90	ur	4.35	9.5501	4.7864	6.0257	4.2659	4.7864	4.2659	5.3704	4.2659	4.7864	3.02
Sub5	2015-01-10	47	3	0.29	90	ur	6.51	4.7864	7.5859	6.0257	6.7609	6.0257	6.7609	6.0257	7.5859	6.0257	6.7609
Sub5	2015-01-10	47	3	0.29	90	ur	5.07	3.02	4.7864	3.802	4.7864	4.2659	5.3704	4.7864	5.3704	4.2659	6.7609
Sub5	2015-01-10	47	3	0.29	90	ur	4.43	12.0228	6.0257	7.5859	6.0257	6.7609	4.2659	6.0257	3.3885	3.802	3.3885
			3
Sub6	2016-04-14	47	3	0.29	90	dr	3.73	21.38	8.5115	10.7154	4.7864	6.0257	3.3885	4.7864	3.02	3.3885	2.6916
Sub6	2016-04-14	47	3	0.29	90	dr	6.14	6.7609	8.5115	5.3704	6.7609	6.0257	6.7609	6.0257	6.7609	5.3704	6.0257
Sub6	2016-04-14	47	3	0.29	90	dr	6.51	5.3704	8.5115	6.0257	6.7609	6.0257	7.5859	6.0257	6.7609	6.0257	6.7609
Sub6	2016-04-14	47	3	0.29	90	dr	4.27	6.7609	8.5115	5.3704	6.0257	5.3704	6.0257	3.3885	3.802	3.02	4.7864
Sub6	2016-04-14	47	3	0.29	90	dr	5.27	5.3704	6.7609	5.3704	6.0257	5.3704	6.7609	4.7864	5.3704	4.2659	5.3704
Sub6	2016-04-14	47	3	0.29	90	dr	5.27	4.2659	6.7609	4.2659	5.3704	4.2659	6.0257	5.3704	6.0257	4.7864	5.3704
Sub6	2016-04-14	47	3	0.29	90	ul	6.38	12.0228	15.1358	9.5501	10.7154	6.7609	7.5859	6.0257	6.7609	5.3704	6.0257
Sub6	2016-04-14	47	3	0.29	90	ul	3.32	2.6916	3.3885	2.3989	2.6916	2.3989	3.3885	3.02	4.2659	3.3885	3.802
Sub6	2016-04-14	47	3	0.29	90	ul	5.69	6.7609	8.5115	6.0257	7.5859	6.0257	6.7609	6.0257	6.7609	4.2659	4.7864
Sub6	2016-04-14	47	3	0.29	90	ul	5.91	13.4898	6.7609	8.5115	6.7609	7.5859	5.3704	6.0257	5.3704	6.0257	5.3704
Sub6	2016-04-14	47	3	0.29	90	ul	6.89	8.5115	10.7154	7.5859	8.5115	6.7609	7.5859	6.7609	7.5859	6.0257	6.7609
Sub6	2016-04-14	47	3	0.29	90	ul	4.03	6.7609	8.5115	4.7864	5.3704	4.2659	4.7864	3.802	4.2659	3.3885	3.802
Sub6	2016-04-15	47	3	0.29	90	dr	5.47	3.02	4.7864	3.802	4.7864	4.2659	5.3704	4.7864	6.0257	5.3704	7.5859
Sub6	2016-04-15	47	3	0.29	90	dr	2.74	1.9055	3.802	3.02	3.802	2.3989	2.6916	2.3989	3.3885	2.6916	3.02
Sub6	2016-04-15	47	3	0.29	90	dr	4.79	4.7864	6.0257	3.802	4.2659	3.802	6.0257	4.7864	5.3704	4.2659	4.7864
Sub6	2016-04-15	47	3	0.29	90	dr	4.35	9.5501	4.7864	6.0257	5.3704	6.7609	5.3704	6.0257	3.02	3.3885	3.02
Sub6	2016-04-15	47	3	0.29	90	dr	3.08	3.02	3.802	1.9055	3.802	2.6916	3.3885	3.02	3.3885	2.6916	3.3885
Sub6	2016-04-15	47	3	0.29	90	dr	3.39	2.3989	3.02	2.138	3.802	2.6916	3.802	3.02	3.802	3.3885	3.802
Sub6	2016-04-15	47	3	0.29	90	dr	2.91	4.7864	6.0257	4.2659	4.7864	3.02	3.802	2.6916	3.02	2.138	3.02
Sub6	2016-04-15	47	3	0.29	90	dr	4.03	3.02	3.802	3.02	4.2659	3.3885	3.802	3.3885	4.7864	4.2659	4.7864
Sub6	2016-04-15	47	3	0.29	90	dr	4.03	9.5501	3.802	4.7864	3.3885	4.2659	3.3885	4.2659	3.802	4.7864	3.802
Sub6	2016-04-15	47	3	0.29	90	dr	2.31	9.5501	4.7864	6.0257	3.02	3.3885	2.3989	2.6916	1.9055	2.138	1.6983
Sub6	2016-04-15	47	3	0.29	90	dr	4.35	9.5501	4.7864	6.0257	4.7864	6.0257	2.6916	4.7864	4.2659	4.7864	4.2659
Sub6	2016-04-15	47	3	0.29	90	dr	3.45	3.802	4.7864	3.3885	3.802	3.3885	3.802	3.3885	3.802	3.02	3.3885
Sub6	2016-04-15	47	3	0.29	90	dr	3.26	1.5136	3.802	3.02	3.3885	2.3989	3.3885	3.02	3.802	3.3885	3.802
Sub6	2016-04-15	47	3	0.29	90	dr	2.85	3.802	4.7864	3.802	4.7864	3.3885	3.802	3.02	4.2659	1.349	2.3989
Sub6	2016-04-16	47	3	0.29	90	dr	3.8	9.5501	7.5859	9.5501	5.3704	6.0257	3.802	4.2659	2.6916	3.802	3.02
Sub6	2016-04-16	47	3	0.29	90	dr	4.97	3.802	4.7864	3.802	4.2659	3.802	5.3704	4.7864	6.0257	4.7864	5.3704
Sub6	2016-04-16	47	3	0.29	90	dr	4.11	4.7864	6.0257	4.7864	5.3704	4.2659	6.7609	3.02	3.802	3.3885	4.2659
Sub6	2016-04-16	47	3	0.29	90	dr	4.03	4.7864	6.0257	4.7864	5.3704	3.802	6.0257	2.6916	5.3704	3.3885	3.802
Sub6	2016-04-16	47	3	0.29	90	dr	4.18	4.7864	6.0257	4.7864	5.3704	4.7864	5.3704	3.3885	4.7864	3.3885	3.802
Sub6	2016-04-16	47	3	0.29	90	dr	4.27	6.0257	7.5859	6.0257	6.7609	4.2659	4.7864	3.802	4.2659	3.802	4.7864
Sub6	2016-04-16	47	3	0.29	90	dr	3.59	12.0228	3.802	4.7864	3.802	4.2659	3.802	4.2659	3.02	3.3885	3.02
Sub6	2016-04-16	47	3	0.29	90	dr	2.1	9.5501	2.3989	3.02	1.9055	2.3989	2.138	2.3989	1.5136	2.3989	1.9055
Sub6	2016-04-16	47	3	0.29	90	dr	3.59	3.802	6.0257	4.2659	4.7864	3.3885	3.802	3.3885	3.802	3.3885	3.802
Sub6	2016-04-16	47	3	0.29	90	dr	3.59	9.5501	3.802	4.7864	2.3989	3.02	2.6916	3.802	3.3885	4.7864	4.2659
Sub6	2016-04-16	47	3	0.29	90	dr	6.38	6.0257	9.5501	4.7864	6.7609	4.2659	6.7609	6.0257	6.7609	6.0257	9.5501
Sub6	2016-04-16	47	3	0.29	90	dr	6.38	3.802	6.0257	4.7864	6.0257	5.3704	6.7609	5.3704	7.5859	6.0257	7.5859
Sub6	2016-04-16	47	3	0.29	90	dr	4.7	4.7864	6.0257	4.2659	4.7864	4.2659	4.7864	4.2659	5.3704	4.2659	5.3704
Sub6	2016-04-16	47	3	0.29	90	dr	5.47	3.802	4.7864	3.3885	4.7864	4.2659	5.3704	4.7864	6.0257	5.3704	7.5859
Sub6	2016-04-16	47	3	0.29	90	dr	7.03	4.7864	6.0257	4.7864	6.7609	5.3704	8.5115	6.7609	7.5859	6.7609	7.5859
Sub6	2016-04-17	47	3	0.29	90	dr	4.03	3.802	4.7864	3.02	5.3704	4.2659	5.3704	3.3885	3.802	3.3885	4.2659
Sub6	2016-04-17	47	3	0.29	90	dr	3.32	3.802	4.7864	3.3885	3.802	3.02	3.3885	3.02	3.3885	3.02	4.2659
Sub6	2016-04-17	47	3	0.29	90	dr	2.74	1.5136	2.3989	1.5136	2.6916	2.3989	3.02	2.3989	3.02	2.3989	3.3885
Sub6	2016-04-17	47	3	0.29	90	dr	3.52	1.9055	3.802	2.6916	4.2659	3.3885	3.802	2.6916	3.3885	3.02	5.3704
Sub6	2016-04-17	47	3	0.29	90	dr	3.32	3.802	4.7864	3.02	3.802	3.3885	3.802	3.3885	3.802	2.6916	3.02
Sub6	2016-04-17	47	3	0.29	90	dr	2.49	4.7864	7.5859	2.6916	3.02	2.6916	3.02	2.138	2.6916	2.138	2.3989
Sub6	2016-04-17	47	3	0.29	90	dr	3.2	6.0257	7.5859	3.3885	3.802	3.02	3.802	2.6916	3.02	2.6916	4.2659
Sub6	2016-04-17	47	3	0.29	90	dr	4.52	3.802	4.7864	3.802	5.3704	4.2659	4.7864	4.2659	4.7864	4.2659	4.7864
Sub6	2016-04-17	47	3	0.29	90	dr	2.54	0.955	1.9055	1.2023	1.9055	1.6983	2.6916	2.3989	3.02	2.6916	3.02
Sub6	2016-04-17	47	3	0.29	90	dr	4.35	4.7864	6.0257	4.2659	4.7864	3.802	4.7864	3.3885	5.3704	4.2659	4.7864
Sub6	2016-04-17	47	3	0.29	90	dr	2.8	3.02	3.802	3.02	3.802	2.3989	3.02	2.6916	3.02	2.6916	3.02
Sub6	2016-04-17	47	3	0.29	90	dr	4.03	3.02	3.802	3.02	4.7864	3.802	4.2659	3.802	4.2659	3.802	4.2659
Sub6	2016-04-17	47	3	0.29	90	dr	4.88	3.802	4.7864	3.802	6.0257	5.3704	6.0257	4.7864	5.3704	3.802	4.2659
Sub6	2016-04-17	47	3	0.29	90	dr	1.91	3.802	4.7864	3.3885	3.802	1.6983	1.9055	1.6983	2.138	1.6983	2.3989
Sub6	2016-04-17	47	3	0.29	90	dr	4.03	2.3989	3.02	1.9055	3.802	3.3885	4.2659	3.802	4.7864	3.802	4.2659
Sub6	2016-04-18	47	3	0.29	90	dr	3.88	4.7864	6.0257	4.7864	5.3704	3.802	4.2659	3.3885	4.2659	3.3885	4.2659
Sub6	2016-04-18	47	3	0.29	90	dr	4.61	6.0257	7.5859	4.7864	5.3704	4.7864	5.3704	3.802	4.7864	4.2659	4.7864
Sub6	2016-04-18	47	3	0.29	90	dr	3.02	4.7864	6.0257	3.02	3.3885	3.02	3.3885	2.6916	3.3885	2.6916	3.02
Sub6	2016-04-18	47	3	0.29	90	dr	2.96	2.3989	3.802	3.02	3.3885	3.02	3.3885	3.02	3.3885	2.3989	2.6916
Sub6	2016-04-18	47	3	0.29	90	dr	2.96	3.802	4.7864	3.802	4.7864	3.3885	3.802	2.3989	3.3885	2.3989	2.6916
Sub6	2016-04-18	47	3	0.29	90	dr	3.52	6.0257	7.5859	3.802	4.7864	3.3885	3.802	3.3885	4.2659	3.02	3.3885
Sub6	2016-04-18	47	3	0.29	90	dr	3.14	3.02	3.802	2.6916	3.3885	3.02	3.3885	3.02	3.802	2.6916	3.02
Sub6	2016-04-18	47	3	0.29	90	dr	2.8	1.9055	3.802	3.02	3.3885	2.3989	3.02	2.3989	3.3885	2.6916	3.02
Sub6	2016-04-18	47	3	0.29	90	dr	4.61	4.7864	6.0257	4.2659	4.7864	4.2659	4.7864	4.2659	4.7864	4.2659	5.3704
Sub6	2016-04-18	47	3	0.29	90	dr	4.11	3.802	4.7864	3.802	4.2659	3.3885	4.7864	4.2659	4.7864	3.02	4.7864
Sub6	2016-04-18	47	3	0.29	90	dr	7.59	4.7864	9.5501	7.5859	8.5115	6.7609	8.5115	6.0257	8.5115	7.5859	8.5115
Sub6	2016-04-18	47	3	0.29	90	dr	3.8	2.3989	3.802	3.02	4.2659	3.802	4.2659	3.802	4.7864	3.02	3.3885
Sub6	2016-04-18	47	3	0.29	90	dr	3.45	4.7864	6.0257	3.02	3.802	3.02	3.802	3.02	3.802	3.3885	3.802
Sub6	2016-04-18	47	3	0.29	90	dr	3.88	3.802	6.0257	4.2659	4.7864	3.802	4.2659	3.802	4.2659	3.3885	3.802
Sub6	2016-04-18	47	3	0.29	90	dr	2.59	2.3989	3.802	3.02	3.802	2.3989	3.02	2.3989	2.6916	2.3989	2.6916
Sub6	2016-04-19	47	3	0.29	90	dr	5.07	13.4898	6.7609	8.5115	3.802	4.7864	3.802	6.0257	5.3704	6.0257	4.7864
Sub6	2016-04-19	47	3	0.29	90	dr	6.38	8.5115	10.7154	8.5115	9.5501	8.5115	9.5501	6.0257	6.7609	4.2659	4.7864
Sub6	2016-04-19	47	3	0.29	90	dr	5.8	13.4898	10.7154	13.4898	6.7609	8.5115	6.7609	7.5859	4.7864	6.0257	3.02
Sub6	2016-04-19	47	3	0.29	90	dr	2.8	2.6916	4.2659	3.3885	4.2659	3.802	4.7864	2.138	2.3989	2.138	2.3989
Sub6	2016-04-19	47	3	0.29	90	dr	4.97	8.5115	10.7154	5.3704	6.0257	4.2659	4.7864	3.802	6.0257	5.3704	6.0257
Sub6	2016-04-19	47	3	0.29	90	dr	3.88	5.3704	6.7609	3.802	4.2659	3.3885	3.802	3.3885	4.2659	3.802	4.7864
Sub6	2016-04-19	47	3	0.29	90	dr	2.31	3.02	3.802	3.02	3.3885	2.6916	3.02	1.9055	2.138	1.9055	2.3989
Sub6	2016-04-19	47	3	0.29	90	dr	3.2	3.802	6.0257	4.2659	4.7864	3.802	4.2659	2.3989	3.3885	2.6916	3.02
Sub6	2016-04-19	47	3	0.29	90	dr	2.91	3.802	4.7864	3.3885	3.802	3.3885	3.802	2.3989	2.6916	2.138	3.3885
Sub6	2016-04-19	47	3	0.29	90	dr	2.96	3.02	3.802	2.3989	2.6916	2.3989	2.6916	2.3989	3.3885	3.02	4.2659
Sub6	2016-04-19	47	3	0.29	90	dr	3.39	9.5501	3.02	3.802	3.02	3.802	3.3885	3.802	3.02	3.3885	3.02
Sub6	2016-04-19	47	3	0.29	90	dr	3.39	3.802	7.5859	2.6916	3.3885	3.02	3.3885	3.02	3.802	3.3885	3.802
Sub6	2016-04-19	47	3	0.29	90	dr	3.08	4.7864	6.0257	4.2659	4.7864	2.6916	3.02	2.6916	3.802	3.02	3.3885
Sub6	2016-04-19	47	3	0.29	90	dr	3.66	6.0257	7.5859	6.0257	6.7609	4.7864	5.3704	2.6916	3.3885	3.02	3.3885
Sub6	2016-04-19	47	3	0.29	90	dr	3.59	6.0257	7.5859	4.7864	5.3704	3.802	4.7864	3.3885	3.802	2.6916	3.3885
Sub6	2016-04-20	47	3	0.29	90	dr	3.8	3.02	4.7864	3.3885	3.802	3.3885	3.802	3.3885	4.2659	3.802	4.2659
Sub6	2016-04-20	47	3	0.29	90	dr	2.35	2.3989	3.02	2.3989	2.6916	2.138	2.6916	2.138	2.3989	1.9055	3.02
Sub6	2016-04-20	47	3	0.29	90	dr	3.08	2.3989	4.7864	3.3885	4.2659	3.02	3.3885	3.02	3.802	2.3989	3.02
Sub6	2016-04-20	47	3	0.29	90	dr	4.18	3.802	4.7864	3.3885	4.2659	3.802	4.7864	3.802	4.7864	3.802	4.2659
Sub6	2016-04-20	47	3	0.29	90	dr	4.43	4.7864	6.0257	3.02	4.2659	3.802	4.7864	4.2659	4.7864	4.2659	4.7864
Sub6	2016-04-20	47	3	0.29	90	ul	7.03	5.3704	6.7609	5.3704	6.7609	6.0257	8.5115	6.0257	7.5859	6.7609	7.5859
Sub6	2016-04-20	47	3	0.29	90	ul	4.35	2.6916	3.3885	2.6916	4.2659	3.3885	4.7864	4.2659	4.7864	4.2659	4.7864
Sub6	2016-04-20	47	3	0.29	90	ul	4.35	2.6916	5.3704	4.2659	4.7864	3.802	4.7864	3.802	4.7864	4.2659	4.7864
Sub6	2016-04-20	47	3	0.29	90	ul	3.66	5.3704	6.7609	3.3885	3.802	3.02	3.802	3.02	3.802	3.3885	5.3704
Sub6	2016-04-20	47	3	0.29	90	ul	4.88	5.3704	8.5115	6.0257	6.7609	5.3704	6.0257	4.2659	4.7864	3.802	5.3704
Sub7	2016-04-15	47	3	0.29	90	dr	6.26	8.5115	10.7154	8.5115	9.5501	6.0257	7.5859	5.3704	6.0257	4.7864	8.5115
Sub7	2016-04-15	47	3	0.29	90	dr	4.61	3.3885	5.3704	3.802	4.7864	4.2659	5.3704	4.2659	5.3704	3.802	4.7864
Sub7	2016-04-15	47	3	0.29	90	dr	4.61	5.3704	6.7609	5.3704	6.7609	3.802	4.7864	4.2659	5.3704	4.2659	5.3704
Sub7	2016-04-15	47	3	0.29	90	dr	4.52	8.5115	10.7154	6.7609	7.5859	3.802	6.0257	3.802	4.7864	4.2659	4.7864
Sub7	2016-04-15	47	3	0.29	90	dr	6.26	5.3704	10.7154	7.5859	8.5115	6.7609	7.5859	5.3704	6.0257	5.3704	6.7609
Sub7	2016-04-15	47	3	0.29	90	dr	4.88	6.7609	8.5115	6.7609	7.5859	6.0257	6.7609	3.802	4.2659	3.802	5.3704
Sub7	2016-04-15	47	3	0.29	90	ul	8.51	8.5115	10.7154	7.5859	8.5115	7.5859	8.5115	7.5859	9.5501	8.5115	9.5501
Sub7	2016-04-15	47	3	0.29	90	ul	6.03	4.2659	8.5115	4.2659	4.7864	4.2659	5.3704	3.802	7.5859	6.7609	10.7154
Sub7	2016-04-15	47	3	0.29	90	ul	6.38	6.7609	8.5115	6.0257	6.7609	5.3704	6.0257	5.3704	7.5859	6.7609	7.5859
Sub7	2016-04-15	47	3	0.29	90	ul	5.91	4.2659	6.7609	5.3704	6.7609	6.0257	6.7609	5.3704	6.7609	4.7864	6.0257
Sub7	2016-04-15	47	3	0.29	90	ul	4.88	2.138	3.3885	2.138	3.02	2.6916	4.2659	3.3885	6.7609	6.0257	8.5115
Sub7	2016-04-15	47	3	0.29	90	ul	7.59	6.7609	8.5115	5.3704	6.0257	4.7864	9.5501	7.5859	8.5115	7.5859	8.5115
Sub7	2016-04-16	47	3	0.29	90	ul	5.69	9.5501	3.802	5.3704	4.7864	6.7609	4.7864	6.0257	5.3704	6.0257	5.3704
Sub7	2016-04-16	47	3	0.29	90	ul	5.17	3.802	4.7864	3.802	4.2659	3.802	4.2659	3.02	7.5859	6.7609	7.5859
Sub7	2016-04-16	47	3	0.29	90	ul	4.11	6.0257	7.5859	3.802	5.3704	3.802	4.2659	3.802	4.7864	3.02	5.3704
Sub7	2016-04-16	47	3	0.29	90	ul	4.11	3.02	3.802	3.02	4.2659	3.802	5.3704	3.802	4.2659	3.3885	4.2659
Sub7	2016-04-16	47	3	0.29	90	ul	6.03	6.0257	9.5501	6.7609	7.5859	6.0257	6.7609	5.3704	6.0257	5.3704	6.7609
Sub7	2016-04-16	47	3	0.29	90	ul	11.35	4.7864	7.5859	6.0257	10.7154	9.5501	10.7154	9.5501	13.4898	12.0228	13.4898
Sub7	2016-04-16	47	3	0.29	90	ul	7.03	9.5501	7.5859	9.5501	6.7609	7.5859	6.0257	7.5859	6.7609	7.5859	6.7609
Sub7	2016-04-16	47	3	0.29	90	ul	9.55	6.0257	9.5501	6.0257	7.5859	6.7609	10.7154	9.5501	10.7154	9.5501	10.7154
Sub7	2016-04-17	47	3	0.29	90	ul	4.88	4.7864	7.5859	6.0257	6.7609	4.7864	5.3704	4.7864	5.3704	4.2659	4.7864
Sub7	2016-04-17	47	3	0.29	90	ul	4.88	4.7864	6.0257	3.802	4.7864	3.802	4.2659	3.802	6.0257	5.3704	6.7609
Sub7	2016-04-17	47	3	0.29	90	ul	5.69	3.802	4.7864	3.802	4.2659	3.802	6.0257	5.3704	6.0257	5.3704	8.5115
Sub7	2016-04-17	47	3	0.29	90	ul	4.18	4.7864	6.0257	4.2659	4.7864	3.802	4.2659	3.802	4.2659	3.802	5.3704
Sub7	2016-04-17	47	3	0.29	90	ul	8.84	6.0257	7.5859	4.7864	6.7609	6.0257	9.5501	8.5115	10.7154	8.5115	10.7154
Sub7	2016-04-17	47	3	0.29	90	ul	5.58	4.7864	6.0257	4.7864	6.0257	5.3704	6.0257	5.3704	6.0257	4.7864	6.0257
Sub7	2016-04-17	47	3	0.29	90	ul	7.03	9.5501	7.5859	9.5501	6.7609	7.5859	6.7609	7.5859	6.7609	7.5859	6.0257
Sub7	2016-04-17	47	3	0.29	90	ul	7.73	4.7864	7.5859	4.7864	6.7609	6.0257	6.7609	6.0257	9.5501	8.5115	10.7154
Sub7	2016-04-17	47	3	0.29	90	ul	4.35	3.802	4.7864	3.3885	4.2659	3.02	4.7864	4.2659	4.7864	4.2659	5.3704
Sub7	2016-04-17	47	3	0.29	90	ul	6.03	9.5501	4.7864	6.0257	5.3704	6.0257	5.3704	6.0257	4.7864	7.5859	6.7609
Sub7	2016-04-17	47	3	0.29	90	ul	5.27	4.7864	6.0257	4.7864	5.3704	4.7864	6.0257	4.2659	5.3704	4.7864	6.7609
Sub7	2016-04-17	47	3	0.29	90	ul	9.74	6.0257	7.5859	6.0257	8.5115	6.7609	10.7154	9.5501	12.0228	9.5501	10.7154
Sub7	2016-04-17	47	3	0.29	90	ul	6.26	4.7864	7.5859	4.7864	6.0257	5.3704	6.0257	4.7864	7.5859	6.7609	7.5859
Sub7	2016-04-17	47	3	0.29	90	ul	5.69	3.02	3.802	3.02	3.802	3.3885	5.3704	4.7864	7.5859	6.7609	7.5859
Sub7	2016-04-17	47	3	0.29	90	ul	5.47	3.802	6.0257	3.3885	4.2659	3.802	5.3704	4.7864	6.7609	6.0257	6.7609
Sub7	2016-04-18	47	3	0.29	90	ul	6.14	3.802	4.7864	3.802	4.2659	3.802	6.0257	5.3704	7.5859	6.7609	8.5115
Sub7	2016-04-18	47	3	0.29	90	ul	5.69	6.0257	9.5501	6.7609	7.5859	5.3704	6.0257	4.7864	5.3704	4.7864	8.5115
Sub7	2016-04-18	47	3	0.29	90	ul	5.69	6.0257	7.5859	6.0257	7.5859	5.3704	6.0257	4.7864	6.0257	5.3704	6.7609
Sub7	2016-04-18	47	3	0.29	90	ul	3.8	3.02	3.802	2.6916	3.3885	3.02	3.3885	3.02	4.7864	3.802	5.3704
Sub7	2016-04-18	47	3	0.29	90	ul	12.02	12.0228	7.5859	9.5501	6.7609	16.9827	15.1358	16.9827	8.5115	9.5501	8.5115
Sub7	2016-04-18	47	3	0.29	90	ul	7.16	9.5501	4.7864	6.7609	5.3704	6.0257	5.3704	8.5115	7.5859	8.5115	7.5859
Sub7	2016-04-18	47	3	0.29	90	ul	6.03	9.5501	4.7864	6.0257	5.3704	7.5859	5.3704	6.0257	4.7864	6.7609	6.0257
Sub7	2016-04-18	47	3	0.29	90	ul	7.44	4.7864	6.0257	4.7864	6.0257	5.3704	7.5859	6.7609	9.5501	7.5859	8.5115
Sub7	2016-04-18	47	3	0.29	90	ul	4.52	4.7864	6.0257	2.6916	3.3885	2.6916	5.3704	4.7864	5.3704	4.2659	5.3704
Sub7	2016-04-18	47	3	0.29	90	ul	6.03	12.0228	3.802	4.7864	3.802	6.7609	4.2659	6.7609	6.0257	6.7609	6.0257
Sub7	2016-04-18	47	3	0.29	90	ul	8.68	6.0257	15.1358	12.0228	13.4898	8.5115	13.4898	8.5115	9.5501	5.3704	8.5115
Sub7	2016-04-18	47	3	0.29	90	ul	6.63	6.0257	7.5859	4.7864	7.5859	6.0257	6.7609	6.0257	6.7609	6.0257	8.5115
Sub7	2016-04-18	47	3	0.29	90	ul	3.59	3.802	4.7864	3.02	3.802	3.3885	4.2659	3.02	3.802	3.3885	3.802
Sub7	2016-04-18	47	3	0.29	90	ul	5.58	6.0257	7.5859	6.0257	7.5859	6.0257	6.7609	5.3704	6.7609	4.2659	4.7864
Sub7	2016-04-18	47	3	0.29	90	ul	3.95	3.802	6.0257	4.7864	5.3704	3.802	4.2659	3.02	4.2659	3.3885	5.3704
Sub7	2016-04-19	47	3	0.29	90	ul	6.38	9.5501	3.802	5.3704	4.2659	6.7609	6.0257	6.7609	6.0257	6.7609	6.0257
Sub7	2016-04-19	47	3	0.29	90	ul	4.35	2.3989	3.802	3.02	3.3885	3.02	4.2659	3.802	4.2659	3.802	8.5115
Sub7	2016-04-19	47	3	0.29	90	ul	4.79	6.0257	7.5859	5.3704	6.7609	5.3704	6.7609	3.802	4.2659	3.802	5.3704
Sub7	2016-04-19	47	3	0.29	90	ul	4.18	4.7864	7.5859	6.0257	6.7609	4.2659	4.7864	3.802	4.2659	3.802	4.2659
Sub7	2016-04-19	47	3	0.29	90	ul	3.26	3.02	3.802	3.02	3.3885	3.02	3.3885	3.02	4.2659	2.6916	3.3885
Sub7	2016-04-19	47	3	0.29	90	ul	3.14	3.02	3.802	2.6916	3.02	2.6916	3.3885	3.02	3.3885	3.02	3.3885
Sub7	2016-04-19	47	3	0.29	90	ul	7.59	6.0257	7.5859	6.0257	8.5115	6.7609	7.5859	6.7609	8.5115	7.5859	8.5115
Sub7	2016-04-19	47	3	0.29	90	ul	5.58	4.7864	6.0257	4.2659	6.0257	5.3704	6.0257	4.7864	6.0257	5.3704	6.0257
Sub7	2016-04-19	47	3	0.29	90	ul	4.11	3.802	4.7864	3.802	4.2659	3.802	4.2659	3.802	4.2659	3.802	4.7864
Sub7	2016-04-19	47	3	0.29	90	ul	4.7	9.5501	4.7864	7.5859	6.0257	6.7609	5.3704	6.0257	3.802	4.2659	3.02
Sub7	2016-04-19	47	3	0.29	90	ul	3.52	4.7864	6.0257	4.7864	5.3704	3.3885	3.802	3.02	3.802	3.3885	3.802
Sub7	2016-04-19	47	3	0.29	90	ul	4.79	3.802	7.5859	5.3704	6.0257	4.7864	5.3704	4.2659	4.7864	4.2659	5.3704
Sub7	2016-04-19	47	3	0.29	90	ul	4.35	6.0257	7.5859	3.3885	4.2659	3.802	4.2659	3.802	4.7864	4.2659	5.3704
Sub7	2016-04-19	47	3	0.29	90	ul	8.04	12.0228	7.5859	9.5501	8.5115	9.5501	7.5859	8.5115	6.7609	8.5115	7.5859
Sub7	2016-04-19	47	3	0.29	90	ul	4.18	9.5501	6.0257	7.5859	5.3704	6.0257	3.3885	3.802	3.3885	4.7864	4.2659
Sub7	2016-04-20	47	3	0.29	90	ul	3.59	3.02	3.802	3.02	3.802	3.02	4.2659	3.3885	3.802	3.3885	3.802
Sub7	2016-04-20	47	3	0.29	90	ul	2.54	3.802	6.0257	4.2659	5.3704	2.6916	3.3885	2.138	2.3989	2.138	2.6916
Sub7	2016-04-20	47	3	0.29	90	ul	2.06	1.5136	1.9055	1.349	2.3989	2.138	3.3885	1.6983	1.9055	1.6983	1.9055
Sub7	2016-04-20	47	3	0.29	90	ul	2.1	2.3989	3.02	2.138	2.3989	2.138	2.3989	1.9055	2.138	1.9055	2.138
Sub7	2016-04-20	47	3	0.29	90	ul	2.54	2.3989	3.02	2.138	3.02	2.3989	3.02	2.3989	3.02	2.138	2.3989
Sub7	2016-04-20	47	3	0.29	90	ul	2.4	3.02	3.802	2.138	2.3989	2.138	2.3989	2.138	3.02	2.138	2.6916
Sub7	2016-04-20	47	3	0.29	90	ul	3.45	3.802	6.0257	3.802	4.2659	3.3885	3.802	3.3885	3.802	3.02	3.3885
Sub7	2016-04-20	47	3	0.29	90	ul	2.85	3.02	3.802	1.9055	2.3989	1.9055	2.138	1.9055	4.2659	3.802	4.2659
Sub7	2016-04-20	47	3	0.29	90	ul	3.26	4.7864	6.0257	3.3885	3.802	3.3885	3.802	3.3885	3.802	2.3989	3.02
Sub7	2016-04-20	47	3	0.29	90	ul	3.45	3.02	3.802	2.6916	3.3885	2.6916	3.802	3.3885	3.802	3.3885	3.802
Sub7	2016-04-20	47	3	0.29	90	ul	3.08	6.7609	8.5115	3.802	4.2659	3.02	3.3885	2.6916	3.02	2.6916	3.802
Sub7	2016-04-20	47	3	0.29	90	ul	7.16	8.5115	10.7154	6.0257	6.7609	6.0257	7.5859	6.0257	7.5859	6.0257	10.7154
Sub7	2016-04-20	47	3	0.29	90	ul	5.17	6.7609	8.5115	6.7609	7.5859	6.0257	6.7609	3.802	4.7864	4.2659	6.0257
Sub7	2016-04-20	47	3	0.29	90	ul	6.38	6.7609	8.5115	6.7609	8.5115	6.7609	8.5115	6.7609	7.5859	4.2659	5.3704
Sub7	2016-04-20	47	3	0.29	90	ul	6.03	8.5115	10.7154	7.5859	9.5501	5.3704	6.7609	6.0257	6.7609	5.3704	6.0257
Sub7	2016-04-21	47	3	0.29	90	dr	5.58	6.7609	8.5115	5.3704	6.0257	5.3704	6.0257	5.3704	6.7609	4.7864	5.3704
Sub7	2016-04-21	47	3	0.29	90	dr	2.96	6.7609	8.5115	3.802	4.2659	2.6916	3.02	2.6916	3.02	2.6916	3.802
Sub7	2016-04-21	47	3	0.29	90	dr	8.68	13.4898	8.5115	10.7154	6.7609	8.5115	6.7609	10.7154	8.5115	10.7154	7.5859
Sub7	2016-04-21	47	3	0.29	90	dr	5.58	6.7609	8.5115	4.2659	6.0257	5.3704	6.0257	3.802	7.5859	5.3704	6.0257
Sub7	2016-04-21	47	3	0.29	90	dr	3.95	5.3704	6.7609	5.3704	6.0257	4.2659	4.7864	3.802	4.2659	3.02	3.802
Sub7	2016-04-21	47	3	0.29	90	ul	4.27	3.02	4.7864	3.3885	4.7864	3.802	4.7864	4.2659	4.7864	3.3885	4.7864
Sub7	2016-04-21	47	3	0.29	90	ul	3.45	3.02	7.5859	4.7864	5.3704	3.802	4.2659	3.3885	3.802	2.6916	3.02
Sub7	2016-04-21	47	3	0.29	90	ul	5.58	4.7864	6.0257	4.7864	6.0257	4.2659	6.0257	5.3704	6.0257	5.3704	6.7609
Sub7	2016-04-21	47	3	0.29	90	ul	2.74	3.02	3.802	2.3989	2.6916	2.138	2.3989	2.138	3.3885	3.02	3.802
Sub7	2016-04-21	47	3	0.29	90	ul	3.08	3.802	4.7864	3.802	4.7864	4.2659	4.7864	2.138	2.6916	2.3989	3.02
Sub8	2016-04-16	47	3	0.29	90	dr	5.37	2.6916	6.7609	5.3704	7.5859	4.7864	6.0257	5.3704	6.0257	4.7864	5.3704
Sub8	2016-04-16	47	3	0.29	90	dr	8.35	8.5115	10.7154	6.7609	7.5859	6.0257	12.0228	8.5115	9.5501	6.7609	8.5115
Sub8	2016-04-16	47	3	0.29	90	dr	8.51	8.5115	10.7154	8.5115	10.7154	8.5115	9.5501	8.5115	9.5501	6.7609	8.5115
Sub8	2016-04-16	47	3	0.29	90	dr	8.35	4.2659	10.7154	6.0257	6.7609	5.3704	8.5115	6.7609	10.7154	9.5501	10.7154
Sub8	2016-04-16	47	3	0.29	90	dr	7.73	6.7609	10.7154	8.5115	9.5501	7.5859	9.5501	7.5859	9.5501	5.3704	7.5859
Sub8	2016-04-16	47	3	0.29	90	dr	5.8	5.3704	6.7609	4.7864	5.3704	4.2659	5.3704	4.7864	8.5115	6.0257	6.7609
Sub8	2016-04-16	47	3	0.29	90	ul	7.03	6.7609	8.5115	6.7609	7.5859	6.7609	7.5859	6.7609	7.5859	6.0257	7.5859
Sub8	2016-04-16	47	3	0.29	90	ul	5.69	5.3704	6.7609	4.2659	4.7864	4.2659	6.7609	6.0257	6.7609	4.7864	6.0257
Sub8	2016-04-16	47	3	0.29	90	ul	5.91	13.4898	3.3885	5.3704	4.7864	5.3704	4.7864	6.7609	6.0257	6.7609	6.0257
Sub8	2016-04-16	47	3	0.29	90	ul	6.14	8.5115	10.7154	6.7609	7.5859	6.0257	6.7609	5.3704	6.0257	5.3704	7.5859
Sub8	2016-04-16	47	3	0.29	90	ul	5.07	4.2659	8.5115	6.7609	7.5859	4.7864	5.3704	4.7864	6.7609	4.2659	4.7864
Sub8	2016-04-16	47	3	0.29	90	ul	3.88	5.3704	8.5115	4.2659	4.7864	3.802	4.2659	3.802	4.2659	3.02	4.2659
Sub8	2016-04-17	47	3	0.29	90	dr	4.52	6.0257	7.5859	5.3704	6.0257	5.3704	6.0257	3.02	4.2659	3.3885	6.0257
Sub8	2016-04-17	47	3	0.29	90	dr	7.59	6.0257	9.5501	5.3704	8.5115	7.5859	8.5115	6.7609	7.5859	6.7609	8.5115
Sub8	2016-04-17	47	3	0.29	90	dr	6.26	3.02	7.5859	6.0257	6.7609	5.3704	6.7609	6.0257	7.5859	5.3704	6.7609
Sub8	2016-04-17	47	3	0.29	90	dr	5.27	3.802	4.7864	3.802	4.7864	4.2659	5.3704	4.7864	6.0257	5.3704	6.0257
Sub8	2016-04-17	47	3	0.29	90	dr	5.37	4.7864	7.5859	6.0257	6.7609	6.0257	6.7609	4.7864	6.0257	4.2659	4.7864
Sub8	2016-04-17	47	3	0.29	90	dr	6.76	4.7864	7.5859	6.0257	7.5859	4.2659	6.7609	6.0257	8.5115	7.5859	8.5115
Sub8	2016-04-17	47	3	0.29	90	dr	5.17	3.802	4.7864	3.3885	4.2659	3.02	3.3885	3.02	9.5501	7.5859	8.5115
Sub8	2016-04-17	47	3	0.29	90	dr	4.52	4.7864	6.0257	4.2659	4.7864	3.802	4.2659	3.802	6.0257	4.2659	5.3704
Sub8	2016-04-17	47	3	0.29	90	dr	3.59	6.0257	7.5859	4.2659	4.7864	3.802	4.2659	3.02	4.2659	3.02	3.3885
Sub8	2016-04-17	47	3	0.29	90	dr	5.07	2.3989	4.7864	3.3885	3.802	3.3885	5.3704	4.2659	5.3704	4.7864	8.5115
Sub8	2016-04-18	47	3	0.29	90	dr	4.03	3.802	4.7864	3.802	4.2659	3.802	4.7864	4.2659	5.3704	3.02	3.3885
Sub8	2016-04-18	47	3	0.29	90	dr	3.2	2.3989	3.02	1.9055	3.3885	2.6916	3.02	2.6916	3.802	3.02	4.2659
Sub8	2016-04-18	47	3	0.29	90	dr	2.85	9.5501	4.7864	6.0257	2.3989	2.6916	2.3989	2.6916	2.3989	3.802	3.3885
Sub8	2016-04-18	47	3	0.29	90	dr	5.37	3.802	6.0257	3.3885	4.2659	3.802	6.0257	5.3704	6.0257	5.3704	6.0257
Sub8	2016-04-18	47	3	0.29	90	dr	4.52	9.5501	3.02	4.2659	3.3885	4.2659	3.802	4.7864	4.2659	5.3704	4.7864
Sub8	2016-04-18	47	3	0.29	90	dr	3.59	3.802	4.7864	3.3885	3.802	3.3885	4.2659	3.3885	4.2659	3.02	3.3885
Sub8	2016-04-18	47	3	0.29	90	dr	6.38	6.0257	9.5501	7.5859	9.5501	6.0257	6.7609	6.0257	6.7609	6.0257	6.7609
Sub8	2016-04-18	47	3	0.29	90	dr	4.35	9.5501	7.5859	9.5501	6.7609	7.5859	3.802	4.2659	3.802	4.2659	3.3885
Sub8	2016-04-18	47	3	0.29	90	dr	6.03	12.0228	7.5859	9.5501	5.3704	6.7609	5.3704	6.0257	5.3704	6.7609	6.0257
Sub8	2016-04-18	47	3	0.29	90	dr	6.38	9.5501	6.0257	7.5859	6.0257	7.5859	6.7609	7.5859	6.7609	8.5115	3.02
Sub8	2016-04-18	47	3	0.29	90	dr	4.7	4.7864	6.0257	4.7864	5.3704	4.2659	4.7864	4.2659	4.7864	4.2659	6.0257
Sub8	2016-04-18	47	3	0.29	90	dr	4.03	3.802	6.0257	4.2659	5.3704	4.7864	5.3704	3.3885	4.2659	3.02	3.802
Sub8	2016-04-18	47	3	0.29	90	dr	3.95	9.5501	3.802	4.7864	4.2659	4.7864	3.802	4.7864	3.3885	3.802	3.3885
Sub8	2016-04-18	47	3	0.29	90	dr	5.69	6.0257	9.5501	5.3704	6.0257	5.3704	6.0257	5.3704	6.0257	5.3704	6.0257
Sub8	2016-04-18	47	3	0.29	90	dr	4.43	1.9055	3.802	2.6916	3.802	3.3885	4.2659	3.802	4.7864	4.2659	6.7609
Sub8	2016-04-18	47	3	0.29	90	dr	6.03	6.0257	7.5859	4.7864	6.7609	6.0257	6.7609	6.0257	6.7609	4.7864	6.0257
Sub8	2016-04-18	47	3	0.29	90	dr	5.58	6.0257	7.5859	6.0257	6.7609	5.3704	6.0257	5.3704	6.7609	4.7864	5.3704
Sub8	2016-04-21	47	3	0.29	90	dr	5.17	6.0257	7.5859	6.0257	6.7609	4.7864	6.0257	4.7864	5.3704	4.7864	5.3704
Sub8	2016-04-21	47	3	0.29	90	dr	4.27	3.802	4.7864	3.802	5.3704	4.7864	5.3704	4.2659	4.7864	3.02	3.802
Sub8	2016-04-21	47	3	0.29	90	dr	5.69	4.7864	6.0257	4.7864	6.7609	5.3704	6.0257	4.7864	6.7609	5.3704	6.0257
Sub8	2016-04-21	47	3	0.29	90	dr	6.38	3.802	4.7864	3.802	4.2659	3.802	6.7609	6.0257	7.5859	6.7609	8.5115
Sub8	2016-04-21	47	3	0.29	90	dr	4.03	6.0257	9.5501	4.2659	5.3704	4.2659	4.7864	3.3885	3.802	3.3885	4.7864
Sub8	2016-04-21	47	3	0.29	90	dr	5.47	4.7864	6.0257	4.7864	5.3704	4.2659	6.0257	5.3704	6.0257	5.3704	6.0257
Sub8	2016-04-21	47	3	0.29	90	dr	3.95	3.802	4.7864	3.3885	4.2659	3.3885	4.2659	3.802	4.2659	3.802	4.2659
Sub8	2016-04-21	47	3	0.29	90	dr	4.35	9.5501	3.802	4.7864	3.802	4.7864	4.2659	4.7864	4.2659	5.3704	3.02
Sub8	2016-04-21	47	3	0.29	90	dr	4.52	6.0257	7.5859	6.0257	6.7609	6.0257	6.7609	3.3885	3.802	3.3885	4.7864
Sub8	2016-04-21	47	3	0.29	90	dr	3.59	4.7864	7.5859	3.802	4.2659	3.802	4.2659	3.3885	3.802	3.02	3.3885
Sub8	2016-04-21	47	3	0.29	90	dr	2.8	6.0257	7.5859	4.7864	5.3704	2.3989	3.02	2.6916	3.02	2.6916	3.02
Sub8	2016-04-21	47	3	0.29	90	dr	2.69	3.02	4.7864	3.3885	3.802	2.6916	3.02	2.3989	2.6916	2.3989	3.02
Sub8	2016-04-21	47	3	0.29	90	dr	4.88	6.0257	7.5859	5.3704	6.0257	5.3704	6.0257	4.7864	5.3704	3.802	4.2659
Sub8	2016-04-21	47	3	0.29	90	dr	3.59	3.802	4.7864	3.02	3.3885	2.6916	3.3885	3.02	4.2659	3.802	4.7864
Sub8	2016-04-21	47	3	0.29	90	dr	2.26	3.802	4.7864	1.9055	2.6916	1.9055	2.3989	2.138	2.3989	2.138	2.6916
Sub8	2016-04-22	47	3	0.29	90	dr	4.52	12.0228	3.802	5.3704	4.7864	6.0257	4.2659	5.3704	3.802	4.2659	3.802
Sub8	2016-04-22	47	3	0.29	90	dr	4.61	12.0228	4.7864	6.7609	6.0257	6.7609	4.2659	5.3704	4.2659	5.3704	2.6916
Sub8	2016-04-22	47	3	0.29	90	dr	5.8	6.0257	9.5501	6.0257	6.7609	6.0257	6.7609	5.3704	6.0257	4.7864	6.0257
Sub8	2016-04-22	47	3	0.29	90	dr	3.59	3.02	4.7864	2.6916	3.02	2.3989	4.2659	3.3885	3.802	3.3885	4.7864
Sub8	2016-04-22	47	3	0.29	90	dr	3.95	3.02	3.802	3.02	3.3885	3.02	3.802	3.3885	4.7864	4.2659	4.7864
Sub8	2016-04-22	47	3	0.29	90	dr	3.73	3.802	4.7864	3.802	4.2659	3.802	4.2659	3.802	4.2659	3.02	3.3885
Sub8	2016-04-22	47	3	0.29	90	dr	4.03	4.7864	6.0257	3.802	4.2659	3.802	4.2659	3.802	4.2659	3.802	4.2659
Sub8	2016-04-22	47	3	0.29	90	dr	3.59	6.0257	7.5859	5.3704	6.0257	3.802	4.2659	3.3885	3.802	3.02	3.3885
Sub8	2016-04-22	47	3	0.29	90	dr	2.64	3.802	6.0257	4.7864	6.0257	4.2659	4.7864	1.9055	2.138	1.9055	2.138
Sub8	2016-04-22	47	3	0.29	90	dr	4.03	3.02	7.5859	4.2659	5.3704	3.802	4.2659	3.3885	4.7864	3.802	4.2659
Sub8	2016-04-22	47	3	0.29	90	dr	5.58	9.5501	7.5859	9.5501	7.5859	9.5501	5.3704	6.0257	5.3704	6.0257	3.02
Sub8	2016-04-22	47	3	0.29	90	dr	3.08	3.02	6.0257	4.7864	6.0257	3.02	4.2659	3.02	3.3885	2.3989	2.6916
Sub8	2016-04-22	47	3	0.29	90	dr	3.52	3.02	4.7864	3.802	4.2659	3.802	4.2659	3.3885	3.802	2.3989	3.802
Sub8	2016-04-22	47	3	0.29	90	dr	4.27	9.5501	4.7864	6.0257	4.2659	4.7864	4.2659	4.7864	3.3885	4.7864	3.802
Sub8	2016-04-22	47	3	0.29	90	dr	3.88	6.0257	9.5501	7.5859	9.5501	3.802	4.2659	3.802	4.2659	3.3885	3.802
Sub8	2016-04-23	47	3	0.29	90	dr	3.08	1.9055	4.7864	3.802	4.2659	3.3885	3.802	2.3989	3.3885	2.6916	3.02
Sub8	2016-04-23	47	3	0.29	90	dr	3.32	3.802	4.7864	3.802	4.7864	3.802	4.2659	2.3989	3.02	2.6916	4.2659
Sub8	2016-04-23	47	3	0.29	90	dr	5.69	12.0228	7.5859	9.5501	8.5115	9.5501	5.3704	6.0257	4.7864	5.3704	4.2659
Sub8	2016-04-23	47	3	0.29	90	dr	3.88	4.7864	6.0257	4.7864	5.3704	4.2659	4.7864	3.802	4.2659	3.02	3.3885
Sub8	2016-04-23	47	3	0.29	90	dr	2.96	9.5501	3.802	4.7864	3.02	3.3885	2.3989	3.02	2.6916	3.3885	3.02
Sub8	2016-04-23	47	3	0.29	90	dr	4.52	3.02	4.7864	3.802	4.7864	4.2659	4.7864	4.2659	4.7864	4.2659	4.7864
Sub8	2016-04-23	47	3	0.29	90	dr	3.59	3.802	4.7864	3.3885	3.802	3.3885	3.802	3.3885	3.802	3.3885	3.802
Sub8	2016-04-23	47	3	0.29	90	dr	3.8	3.02	4.7864	3.802	4.7864	3.3885	3.802	3.3885	4.7864	3.3885	4.2659
Sub8	2016-04-23	47	3	0.29	90	dr	2.35	6.0257	7.5859	3.3885	3.802	2.138	2.3989	1.9055	2.3989	2.138	3.3885
Sub8	2016-04-23	47	3	0.29	90	dr	3.45	3.802	4.7864	3.802	4.2659	3.802	4.2659	3.02	3.3885	3.02	3.3885
Sub8	2016-04-23	47	3	0.29	90	dr	2.74	3.02	4.7864	1.9055	2.6916	2.3989	2.6916	2.3989	3.02	2.6916	3.3885
Sub8	2016-04-23	47	3	0.29	90	dr	2.54	3.02	4.7864	3.02	3.3885	2.6916	3.02	1.9055	2.6916	2.138	3.02
Sub8	2016-04-23	47	3	0.29	90	dr	2.64	3.02	3.802	2.3989	3.02	2.3989	3.02	2.3989	2.6916	2.3989	3.02
Sub8	2016-04-23	47	3	0.29	90	dr	4.11	3.02	3.802	3.02	4.2659	3.802	4.7864	3.802	4.2659	3.802	4.2659
Sub8	2016-04-23	47	3	0.29	90	dr	3.95	3.802	4.7864	3.02	3.3885	3.02	3.802	3.3885	4.7864	4.2659	4.7864
Sub8	2016-04-25	47	3	0.29	90	dr	5.47	4.2659	5.3704	3.3885	4.7864	4.2659	5.3704	4.2659	6.7609	6.0257	6.7609
Sub8	2016-04-25	47	3	0.29	90	dr	3.26	8.5115	10.7154	7.5859	8.5115	3.3885	3.802	2.6916	3.3885	3.02	3.3885
Sub8	2016-04-25	47	3	0.29	90	dr	5.58	5.3704	8.5115	6.7609	7.5859	6.0257	7.5859	4.7864	5.3704	4.7864	5.3704
Sub8	2016-04-25	47	3	0.29	90	dr	3.88	13.4898	4.2659	5.3704	3.802	4.2659	3.02	4.2659	3.802	4.2659	3.802
Sub8	2016-04-25	47	3	0.29	90	dr	5.17	6.7609	8.5115	4.7864	5.3704	4.7864	6.0257	5.3704	6.7609	3.802	4.7864
Sub8	2016-04-25	47	3	0.29	90	ul	5.07	5.3704	6.7609	5.3704	6.0257	5.3704	6.0257	4.2659	6.0257	4.2659	4.7864
Sub8	2016-04-25	47	3	0.29	90	ul	4.97	6.7609	8.5115	4.7864	5.3704	4.2659	4.7864	3.802	6.0257	5.3704	6.0257
Sub8	2016-04-25	47	3	0.29	90	ul	3.52	5.3704	6.7609	3.02	3.3885	3.02	3.802	3.3885	3.802	3.3885	3.802
Sub8	2016-04-25	47	3	0.29	90	ul	5.27	8.5115	10.7154	6.0257	6.7609	6.0257	6.7609	4.2659	4.7864	4.2659	6.0257
Sub8	2016-04-25	47	3	0.29	90	ul	4.61	3.3885	4.2659	3.3885	4.2659	3.802	6.0257	4.2659	4.7864	3.802	5.3704
