# Supplementary material for: Bottom-up and top-down influences at untrained conditions determine perceptual learning specificity and transfer
Source: eLife. 2016 Jul 5;5:e14614. doi: 10.7554/eLife.14614 (PMC4965262; doi:10.7554/eLife.14614)
Supplement: Figure 5—source data 1. — The other data sheets contain raw staircase data for 5b and 5c. DOI: http://dx.doi.org/10.7554/eLife.14614.012 [file elife-14614-fig5-data1.xlsx]

## Sheet: Summary_Fig5
Figure 5b
Average(N = 8)
Session	Trained	error	Transfer	error
day1	6.13465	0.841136	6.10029	0.668651
day2	4.90634	0.765365
day3	4.03731	0.307416
day4	4.34433	0.5505
day5	3.64622	0.545271
day6	3.21633	0.341543
day7	4.25456	0.474766	4.30205	0.505663
IMP	0.283686	0.041346	0.289106	0.0450013
TI			1.04314	0.0884342
Individuals
SUB1	Trained	error	Transfer	error		SUB2	Trained	error	Transfer	error		SUB3	Trained	error	Transfer	error
day1	4.39907	0.293963	4.95567	0.626102		day1	6.97231	0.924806	6.68295	0.285979		day1	4.73379	0.225047	5.14793	0.701802
day2	3.91962	0.158688				day2	4.93297	0.412913				day2	5.34382	0.262722
day3	3.67398	0.221643				day3	4.0943	0.614558				day3	3.77909	0.325662
day4	3.62841	0.228185				day4	3.29044	0.208064				day4	3.96232	0.176202
day5	2.95778	0.208331				day5	2.58437	0.206678				day5	4.02232	0.402016
day6	2.93736	0.16138				day6	2.15727	0.171927				day6	3.7665	0.256206
day7	3.59112	0.442799	3.78716	0.294354		day7	3.70347	0.755371	3.12576	0.354133		day7	4.12319	0.413284	4.28254	0.626765
IMP	0.183665		0.235793			IMP	0.468832		0.532279			IMP	0.128988		0.168104
TI			1.28382			TI			1.13533			TI			1.30325
SUB4	Trained	error	Transfer	error		SUB5	Trained	error	Transfer	error		SUB6	Trained	error	Transfer	error
day1	10.3139	1.13622	8.91271	0.769166		day1	4.54704	0.953259	4.44958	0.603727		day1	3.22289	0.287082	3.49425	0.462688
day2	9.62725	0.547055				day2	2.96566	0.167547				day2	2.58817	0.862733
day3	5.25162	0.503641				day3	2.95037	0.201327				day3	2.93101	0.186
day4	6.00206	0.766681				day4	2.67027	0.13689				day4	2.76673	0.253702
day5	6.79794	0.562783				day5	3.14208	0.194888				day5	1.73248	0.115979
day6	4.49253	0.358252				day6	2.93875	0.162015				day6	1.70927	0.176948
day7	6.10258	1.19808	6.40707	0.70848		day7	3.68028	0.233624	3.86163	0.283771		day7	2.25554	0.244949	2.16921	0.322397
IMP	0.408314		0.281131			IMP	0.19062		0.132134			IMP	0.30015		0.379206
TI			0.688517			TI			0.693182			TI			1.26339
SUB7	Trained	error	Transfer	error		SUB8	Trained	error	Transfer	error
day1	8.45654	0.829279	8.16178	0.440257		day1	6.4317	0.818242	6.99748	0.541064
day2	5.26004	0.433988				day2	4.61317	0.614351
day3	4.90721	0.407708				day3	4.71092	0.389733
day4	6.48824	0.404056				day4	5.9462	0.418779
day5	4.61912	0.411247				day5	3.31365	0.287687
day6	4.19096	0.724592				day6	3.53801	0.130022
day7	6.284	0.552	6.14046	0.720407		day7	4.29631	0.768932	4.64253	0.698073
IMP	0.256906		0.247656			IMP	0.332011		0.336543
TI			0.963995			TI			1.01365
Figure 5c
Average(N = 8)
Session	Exposed	error
day1	5.85574	0.458853
day2
day3
day4
day5
day6
day7	5.9517	0.545383
IMP	-0.0132099	0.0563331
Individuals
SUB1	Exposed	error		SUB2	Exposed	error		SUB3	Exposed	error
DAY1	4.93693	0.407598		DAY1	6.93516	0.315911		DAY1	8.1277	0.477018
DAY2				DAY2				DAY2
DAY3				DAY3				DAY3
DAY4				DAY4				DAY4
DAY5				DAY5				DAY5
DAY6				DAY6				DAY6
DAY7	5.60143	0.392675		DAY7	8.22886	0.83353		DAY7	6.91226	0.590683
IMP	-0.134598			IMP	-0.186542			IMP	0.149543
SUB4	Exposed	error		SUB5	Exposed	error		SUB6	Exposed	error
DAY1	5.08645	0.389433		DAY1	6.02523	0.511896		DAY1	3.91291	0.721588
DAY2				DAY2				DAY2
DAY3				DAY3				DAY3
DAY4				DAY4				DAY4
DAY5				DAY5				DAY5
DAY6				DAY6				DAY6
DAY7	5.87401	0.799514		DAY7	6.63149	0.351439		DAY7	2.9403	0.237495
IMP	-0.154835			IMP	-0.100621			IMP	0.248565
SUB7	Exposed	error		SUB8	Exposed	error
DAY1	6.24112	0.744525		DAY1	5.58045	0.743921
DAY2				DAY2
DAY3				DAY3
DAY4				DAY4
DAY5				DAY5
DAY6				DAY6
DAY7	6.33508	0.676748		DAY7	5.09013	0.647971
IMP	-0.0150548			IMP	0.0878631
Figure 5d
Improvement
	Trained	error	Transfer	error
Fig 5b	0.283686	0.041346	0.289106	0.0450013
			Exposed	error
Fig 5c			-0.0132099	0.0563331
Figure 5e
Transfer index
	TI	err
Fig 4d	0.130552	0.11248
Fig 5b	1.04314	0.0884342

## Sheet: Raw_Fig5b
ID	date	contrast	spatial frequency (c/d)	standard deviation (deg)	orientation (deg)	Location	threshold	preliminary reversals				experimental reversals
Sub1	2014-12-24	47	3	0.29	90	dl	3.59	12.0228	3.802	4.7864	3.3885	3.802	3.3885	3.802	3.3885	3.802	3.3885
Sub1	2014-12-24	47	3	0.29	90	dl	5.37	9.5501	6.0257	8.5115	6.0257	6.7609	5.3704	6.0257	4.2659	5.3704	4.7864
Sub1	2014-12-24	47	3	0.29	90	dl	4.11	9.5501	6.0257	7.5859	4.2659	5.3704	4.7864	5.3704	3.02	3.802	3.02
Sub1	2014-12-24	47	3	0.29	90	dl	4.52	3.802	4.7864	3.802	4.7864	4.2659	4.7864	3.802	4.7864	4.2659	5.3704
Sub1	2014-12-25					dl	4.6
Sub1	2014-12-24	47	3	0.29	90	ur	4.61	4.7864	6.0257	3.802	4.7864	4.2659	5.3704	4.2659	5.3704	3.802	4.7864
Sub1	2014-12-24	47	3	0.29	90	ur	6.03	6.0257	7.5859	6.0257	7.5859	6.0257	6.7609	5.3704	6.0257	5.3704	6.7609
Sub1	2014-12-24	47	3	0.29	90	ur	3.02	12.0228	3.02	3.802	3.02	3.3885	2.6916	3.802	2.6916	3.02	2.6916
Sub1	2014-12-24	47	3	0.29	90	ur	5.37	9.5501	6.0257	7.5859	6.0257	6.7609	6.0257	6.7609	4.7864	5.3704	3.3885
Sub1	2014-12-24	47	3	0.29	90	ur	6.63	9.5501	7.5859	9.5501	6.7609	7.5859	6.0257	7.5859	6.0257	6.7609	6.0257
Sub1	2014-12-29	47	3	0.29	90	dl	4.7	6.0257	9.5501	2.6916	4.2659	3.802	4.2659	3.802	5.3704	4.7864	6.7609
Sub1	2014-12-29	47	3	0.29	90	dl	3.88	3.802	7.5859	5.3704	6.0257	4.2659	4.7864	3.802	5.3704	2.6916	3.02
Sub1	2014-12-29	47	3	0.29	90	dl	3.66	4.7864	6.0257	4.2659	5.3704	3.802	4.2659	3.02	3.802	3.3885	3.802
Sub1	2014-12-29	47	3	0.29	90	dl	3.95	6.0257	7.5859	3.02	3.3885	3.02	3.802	3.02	5.3704	4.2659	4.7864
Sub1	2014-12-29	47	3	0.29	90	dl	4.88	4.7864	6.0257	4.7864	5.3704	4.7864	5.3704	4.2659	4.7864	4.2659	6.0257
Sub1	2014-12-29	47	3	0.29	90	dl	4.35	9.5501	3.802	4.7864	3.3885	4.7864	4.2659	5.3704	4.2659	4.7864	3.02
Sub1	2014-12-29	47	3	0.29	90	dl	4.03	4.7864	6.0257	3.3885	4.7864	3.802	4.2659	3.802	4.2659	3.802	4.2659
Sub1	2014-12-29	47	3	0.29	90	dl	3.66	3.802	7.5859	3.802	4.2659	3.02	3.3885	3.02	4.7864	3.802	4.2659
Sub1	2014-12-29	47	3	0.29	90	dl	3.88	2.3989	4.7864	3.02	3.3885	3.02	4.2659	3.802	4.2659	3.802	4.2659
Sub1	2014-12-29	47	3	0.29	90	dl	4.18	1.9055	4.7864	3.802	4.7864	3.3885	3.802	3.02	5.3704	4.7864	5.3704
Sub1	2014-12-29	47	3	0.29	90	dl	3.73	4.7864	6.0257	4.7864	5.3704	4.2659	4.7864	3.3885	4.2659	2.6916	3.3885
Sub1	2014-12-29	47	3	0.29	90	dl	4.7	6.0257	7.5859	6.0257	6.7609	6.0257	6.7609	3.802	4.2659	3.802	4.2659
Sub1	2014-12-29	47	3	0.29	90	dl	3.2	4.7864	6.0257	3.3885	3.802	2.6916	3.02	2.6916	3.802	3.3885	3.802
Sub1	2014-12-29	47	3	0.29	90	dl	2.69	3.02	3.802	2.6916	3.02	2.6916	3.02	2.3989	2.6916	2.3989	3.02
Sub1	2014-12-31	47	3	0.29	90	dl	5.47	6.0257	7.5859	4.7864	6.0257	5.3704	7.5859	4.7864	5.3704	4.7864	5.3704
Sub1	2014-12-31	47	3	0.29	90	dl	3.52	4.7864	6.0257	4.7864	5.3704	4.2659	4.7864	2.6916	3.3885	3.02	3.3885
Sub1	2014-12-31	47	3	0.29	90	dl	4.03	3.02	3.802	3.02	4.2659	3.802	4.2659	3.802	4.2659	3.802	4.2659
Sub1	2014-12-31	47	3	0.29	90	dl	2.91	6.0257	7.5859	3.802	4.2659	3.02	3.3885	2.3989	2.6916	2.3989	3.802
Sub1	2014-12-31	47	3	0.29	90	dl	3.52	4.7864	6.0257	4.2659	4.7864	3.02	3.802	3.3885	3.802	3.3885	3.802
Sub1	2014-12-31	47	3	0.29	90	dl	4.03	3.802	4.7864	3.02	3.802	3.3885	4.7864	4.2659	4.7864	3.3885	3.802
Sub1	2014-12-31	47	3	0.29	90	dl	2.26	2.3989	3.02	2.3989	2.6916	2.138	2.3989	2.138	2.6916	1.9055	2.3989
Sub1	2014-12-31	47	3	0.29	90	dl	4.27	3.802	6.0257	3.3885	4.2659	3.3885	4.2659	3.802	5.3704	4.2659	4.7864
Sub1	2014-12-31	47	3	0.29	90	dl	4.7	3.802	4.7864	3.802	5.3704	4.2659	6.7609	5.3704	6.0257	3.02	3.802
Sub1	2014-12-31	47	3	0.29	90	dl	4.52	4.7864	6.0257	4.2659	4.7864	3.802	4.7864	4.2659	4.7864	4.2659	5.3704
Sub1	2014-12-31	47	3	0.29	90	dl	3.73	3.02	3.802	3.02	3.802	3.3885	3.802	3.3885	4.7864	3.3885	3.802
Sub1	2014-12-31	47	3	0.29	90	dl	2.85	3.802	6.0257	2.3989	3.02	2.6916	3.02	2.6916	3.02	2.6916	3.02
Sub1	2014-12-31	47	3	0.29	90	dl	3.45	3.802	6.0257	4.7864	5.3704	3.02	3.3885	3.02	3.3885	3.02	5.3704
Sub1	2014-12-31	47	3	0.29	90	dl	3.39	4.7864	6.0257	3.802	4.2659	3.802	4.7864	3.3885	3.802	2.3989	2.6916
Sub1	2015-01-01	47	3	0.29	90	dl	4.52	9.5501	3.802	4.7864	4.2659	5.3704	4.2659	4.7864	4.2659	4.7864	3.802
Sub1	2015-01-01	47	3	0.29	90	dl	3.8	6.0257	7.5859	4.2659	4.7864	4.2659	4.7864	3.02	3.802	3.3885	3.802
Sub1	2015-01-01	47	3	0.29	90	dl	2.54	6.0257	7.5859	5.3704	6.0257	2.138	2.6916	2.3989	3.02	2.3989	2.6916
Sub1	2015-01-01	47	3	0.29	90	dl	2.49	1.9055	2.3989	1.6983	2.138	1.6983	1.9055	1.6983	3.02	2.3989	6.0257
Sub1	2015-01-01	47	3	0.29	90	dl	3.59	3.802	4.7864	3.3885	3.802	3.02	3.802	3.3885	3.802	3.3885	4.2659
Sub1	2015-01-01	47	3	0.29	90	dl	5.58	4.7864	6.0257	4.7864	6.0257	5.3704	6.7609	5.3704	6.0257	4.7864	5.3704
Sub1	2015-01-01	47	3	0.29	90	dl	3.45	1.9055	3.02	2.3989	2.6916	2.3989	4.2659	3.802	4.2659	3.02	3.3885
Sub1	2015-01-01	47	3	0.29	90	dl	3.08	3.02	4.7864	3.02	3.802	2.3989	3.02	2.3989	3.3885	3.02	4.7864
Sub1	2015-01-01	47	3	0.29	90	dl	3.02	2.3989	3.02	2.3989	3.02	2.6916	3.02	2.138	3.3885	3.02	4.2659
Sub1	2015-01-01	47	3	0.29	90	dl	3.32	2.3989	6.0257	4.7864	5.3704	3.02	3.802	3.02	3.3885	3.02	3.802
Sub1	2015-01-01	47	3	0.29	90	dl	4.7	3.802	4.7864	3.802	4.7864	4.2659	4.7864	4.2659	6.0257	4.2659	4.7864
Sub1	2015-01-01	47	3	0.29	90	dl	4.27	4.7864	6.0257	4.7864	5.3704	3.802	5.3704	3.802	4.7864	3.802	4.2659
Sub1	2015-01-01	47	3	0.29	90	dl	3.95	1.9055	2.3989	1.9055	3.3885	2.6916	4.2659	3.3885	4.2659	3.802	6.0257
Sub1	2015-01-01	47	3	0.29	90	dl	3.73	6.0257	9.5501	4.2659	4.7864	3.3885	3.802	3.3885	3.802	3.3885	4.7864
Sub1	2015-01-03	47	3	0.29	90	dl	1.67	1.5136	1.9055	1.5136	1.6983	1.349	1.6983	1.349	1.6983	1.349	3.02
Sub1	2015-01-03	47	3	0.29	90	dl	3.2	3.802	7.5859	6.0257	6.7609	2.6916	3.802	3.02	3.3885	3.02	3.3885
Sub1	2015-01-03	47	3	0.29	90	dl	3.95	6.0257	7.5859	4.2659	4.7864	4.2659	4.7864	4.2659	4.7864	2.6916	3.3885
Sub1	2015-01-03	47	3	0.29	90	dl	3.52	6.0257	7.5859	4.7864	5.3704	4.2659	4.7864	3.802	4.2659	2.138	2.6916
Sub1	2015-01-03	47	3	0.29	90	dl	3.32	12.0228	3.02	3.802	3.02	4.2659	3.802	4.2659	2.6916	3.02	2.3989
Sub1	2015-01-03	47	3	0.29	90	dl	4.18	9.5501	7.5859	9.5501	6.7609	7.5859	2.6916	4.2659	3.802	4.2659	3.802
Sub1	2015-01-03	47	3	0.29	90	dl	1.94	1.5136	1.9055	1.349	1.5136	1.349	1.9055	1.6983	2.3989	2.138	2.3989
Sub1	2015-01-03	47	3	0.29	90	dl	2.64	1.9055	2.3989	1.9055	2.138	1.9055	3.3885	2.6916	3.02	2.3989	2.6916
Sub1	2015-01-03	47	3	0.29	90	dl	3.02	1.9055	3.802	3.02	3.802	2.6916	3.3885	2.6916	3.02	2.6916	3.802
Sub1	2015-01-03	47	3	0.29	90	dl	3.73	6.0257	9.5501	6.7609	7.5859	5.3704	6.0257	3.3885	3.802	2.138	3.02
Sub1	2015-01-03	47	3	0.29	90	dl	3.26	4.7864	9.5501	3.802	4.7864	2.6916	4.2659	3.02	3.3885	3.02	3.3885
Sub1	2015-01-03	47	3	0.29	90	dl	2.96	3.02	3.802	2.6916	3.02	2.6916	3.02	2.6916	3.802	2.6916	3.02
Sub1	2015-01-03	47	3	0.29	90	dl	2.31	3.802	4.7864	3.3885	4.2659	2.3989	3.802	1.9055	2.138	1.9055	2.138
Sub1	2015-01-04	47	3	0.29	90	dl	2.91	12.0228	7.5859	9.5501	3.802	4.2659	3.02	4.7864	2.138	2.3989	1.9055
Sub1	2015-01-04	47	3	0.29	90	dl	3.88	3.802	4.7864	3.802	4.2659	3.3885	4.2659	3.02	4.2659	3.802	4.7864
Sub1	2015-01-04	47	3	0.29	90	dl	4.03	1.9055	3.02	2.3989	4.2659	3.802	6.0257	3.802	4.7864	3.02	3.3885
Sub1	2015-01-04	47	3	0.29	90	dl	3.2	3.802	4.7864	2.3989	3.3885	2.6916	3.02	2.6916	3.802	3.3885	3.802
Sub1	2015-01-04	47	3	0.29	90	dl	3.39	6.0257	7.5859	5.3704	6.7609	3.3885	3.802	3.3885	4.2659	2.6916	3.02
Sub1	2015-01-04	47	3	0.29	90	dl	2.35	6.0257	7.5859	2.6916	3.02	2.138	2.3989	2.138	2.6916	2.138	2.6916
Sub1	2015-01-04	47	3	0.29	90	dl	2.69	3.802	6.0257	4.2659	4.7864	3.802	4.2659	1.9055	2.3989	2.138	2.3989
Sub1	2015-01-04	47	3	0.29	90	dl	3.2	3.02	3.802	2.6916	3.802	3.02	3.802	2.6916	3.3885	3.02	3.3885
Sub1	2015-01-04	47	3	0.29	90	dl	2.64	3.802	4.7864	3.02	3.3885	3.02	3.802	1.6983	3.02	2.138	2.6916
Sub1	2015-01-04	47	3	0.29	90	dl	2.02	6.0257	7.5859	5.3704	6.0257	1.9055	2.138	1.9055	2.138	1.9055	2.138
Sub1	2015-01-04	47	3	0.29	90	dl	3.02	3.802	4.7864	3.802	4.7864	3.02	3.3885	3.02	3.802	2.3989	2.6916
Sub1	2015-01-04	47	3	0.29	90	dl	2.4	3.802	6.0257	3.02	3.3885	2.3989	2.6916	2.138	2.3989	2.138	2.6916
Sub1	2015-01-04	47	3	0.29	90	dl	3.14	9.5501	3.802	4.7864	3.802	4.2659	3.3885	3.802	2.138	3.02	2.6916
Sub1	2015-01-05	47	3	0.29	90	dl	5.17	9.5501	3.02	4.2659	3.02	4.2659	3.802	7.5859	5.3704	6.0257	4.7864
Sub1	2015-01-05	47	3	0.29	90	dl	3.59	4.7864	7.5859	3.02	3.802	3.3885	3.802	3.3885	3.802	3.3885	3.802
Sub1	2015-01-05	47	3	0.29	90	dl	4.52	3.802	6.0257	4.2659	4.7864	4.2659	5.3704	4.7864	5.3704	3.3885	4.2659
Sub1	2015-01-05	47	3	0.29	90	dl	4.03	3.802	4.7864	3.802	4.2659	3.802	4.2659	3.802	4.2659	3.802	4.2659
Sub1	2015-01-05	47	3	0.29	90	dl	2.18	4.7864	7.5859	3.02	4.2659	2.138	2.3989	2.138	2.3989	1.9055	2.138
Sub1	2015-01-05	47	3	0.29	90	dl	2.91	4.7864	6.0257	2.138	3.02	2.6916	3.02	2.3989	3.02	2.6916	3.802
Sub1	2015-01-05	47	3	0.29	90	ur	4.43	6.0257	7.5859	6.0257	6.7609	4.7864	6.0257	5.3704	6.0257	2.6916	3.02
Sub1	2015-01-05	47	3	0.29	90	ur	3.59	3.02	4.7864	3.802	5.3704	3.802	4.2659	3.3885	3.802	2.6916	3.802
Sub1	2015-01-05	47	3	0.29	90	ur	4.61	3.802	6.0257	4.2659	4.7864	4.2659	4.7864	4.2659	5.3704	4.2659	4.7864
Sub1	2015-01-05	47	3	0.29	90	ur	3.08	6.0257	7.5859	3.02	3.3885	3.02	3.3885	3.02	3.3885	2.6916	3.02
Sub1	2015-01-05	47	3	0.29	90	ur	3.45	9.5501	2.3989	3.3885	3.02	3.3885	2.6916	3.802	3.3885	4.7864	3.02
Sub2	2014-12-26	47	3	0.29	90	ur	10.12	12.0228	9.5501	12.0228	7.5859	9.5501	7.5859	10.7154	8.5115	13.4898	12.0228
Sub2	2014-12-26	47	3	0.29	90	ur	8.35	7.5859	9.5501	7.5859	8.5115	7.5859	8.5115	6.7609	9.5501	7.5859	10.7154
Sub2	2014-12-26	47	3	0.29	90	ur	4.79	6.0257	9.5501	5.3704	6.0257	4.2659	4.7864	4.2659	4.7864	4.2659	6.7609
Sub2	2014-12-26	47	3	0.29	90	ur	6.14	12.0228	6.0257	7.5859	6.7609	7.5859	6.0257	7.5859	5.3704	6.0257	4.7864
Sub2	2014-12-26	47	3	0.29	90	ur	6.63	12.0228	9.5501	12.0228	9.5501	10.7154	4.7864	6.7609	6.0257	6.7609	6.0257
Sub2	2014-12-26	47	3	0.29	90	dl	6.38	8.5115	13.4898	10.7154	13.4898	5.3704	6.0257	5.3704	7.5859	6.7609	7.5859
Sub2	2014-12-26	47	3	0.29	90	dl	5.8	12.0228	6.0257	7.5859	5.3704	7.5859	4.7864	6.7609	6.0257	6.7609	3.802
Sub2	2014-12-26	47	3	0.29	90	dl	7.3	7.5859	9.5501	5.3704	9.5501	8.5115	10.7154	6.0257	6.7609	6.0257	6.7609
Sub2	2014-12-26	47	3	0.29	90	dl	6.76	6.0257	12.0228	9.5501	10.7154	6.7609	8.5115	5.3704	7.5859	5.3704	7.5859
Sub2	2014-12-26	47	3	0.29	90	dl	7.3	7.5859	12.0228	7.5859	9.5501	7.5859	8.5115	6.7609	7.5859	6.0257	7.5859
Sub2	2014-12-29	47	3	0.29	90	ur	7.16	6.0257	12.0228	6.0257	6.7609	6.0257	6.7609	6.0257	8.5115	7.5859	8.5115
Sub2	2014-12-29	47	3	0.29	90	ur	7.73	7.5859	12.0228	7.5859	8.5115	7.5859	9.5501	6.7609	7.5859	6.7609	8.5115
Sub2	2014-12-29	47	3	0.29	90	ur	4.79	4.7864	6.0257	4.2659	5.3704	4.2659	6.0257	4.2659	5.3704	4.2659	4.7864
Sub2	2014-12-29	47	3	0.29	90	ur	3.8	7.5859	9.5501	7.5859	8.5115	3.3885	3.802	3.3885	4.2659	3.802	4.2659
Sub2	2014-12-29	47	3	0.29	90	ur	7.3	6.0257	9.5501	6.7609	8.5115	6.7609	8.5115	6.7609	7.5859	6.7609	7.5859
Sub2	2014-12-29	47	3	0.29	90	ur	4.61	12.0228	4.7864	9.5501	5.3704	6.0257	4.7864	5.3704	4.2659	4.7864	3.02
Sub2	2014-12-29	47	3	0.29	90	ur	4.52	3.802	6.0257	4.7864	5.3704	3.802	6.0257	3.802	4.7864	4.2659	4.7864
Sub2	2014-12-29	47	3	0.29	90	ur	2.26	19.0549	3.02	3.802	3.3885	3.802	1.9055	2.6916	1.9055	2.138	1.6983
Sub2	2014-12-29	47	3	0.29	90	ur	6.14	7.5859	9.5501	7.5859	8.5115	7.5859	9.5501	6.0257	7.5859	3.802	4.2659
Sub2	2014-12-29	47	3	0.29	90	ur	4.52	7.5859	9.5501	4.7864	5.3704	4.7864	6.0257	4.7864	5.3704	3.02	3.802
Sub2	2014-12-29	47	3	0.29	90	ur	4.11	6.0257	9.5501	6.7609	7.5859	5.3704	6.0257	3.02	3.3885	3.02	4.7864
Sub2	2014-12-29	47	3	0.29	90	ur	6.03	7.5859	9.5501	7.5859	8.5115	6.0257	9.5501	5.3704	6.0257	4.7864	5.3704
Sub2	2014-12-29	47	3	0.29	90	ur	5.37	7.5859	9.5501	7.5859	9.5501	5.3704	7.5859	5.3704	6.7609	3.802	4.2659
Sub2	2014-12-29	47	3	0.29	90	ur	3.95	12.0228	3.802	4.7864	4.2659	6.0257	3.02	3.802	2.6916	4.7864	4.2659
Sub2	2014-12-30	47	3	0.29	90	ur	12.02	7.5859	15.1358	10.7154	12.0228	10.7154	12.0228	10.7154	13.4898	12.0228	13.4898
Sub2	2014-12-30	47	3	0.29	90	ur	4.88	6.0257	7.5859	6.0257	6.7609	4.7864	6.0257	4.2659	5.3704	4.2659	4.7864
Sub2	2014-12-30	47	3	0.29	90	ur	3.66	2.3989	3.02	2.3989	4.2659	3.802	4.2659	3.3885	4.2659	3.02	3.3885
Sub2	2014-12-30	47	3	0.29	90	ur	4.27	3.802	4.7864	3.802	4.7864	4.2659	5.3704	4.2659	4.7864	3.02	4.2659
Sub2	2014-12-30	47	3	0.29	90	ur	4.52	6.0257	7.5859	4.2659	4.7864	3.802	4.2659	3.802	5.3704	4.7864	5.3704
Sub2	2014-12-30	47	3	0.29	90	ur	3.88	6.0257	7.5859	6.0257	6.7609	3.802	4.7864	3.802	4.2659	3.02	3.802
Sub2	2014-12-30	47	3	0.29	90	ur	4.43	4.7864	6.0257	4.2659	4.7864	4.2659	5.3704	4.2659	6.0257	3.3885	3.802
Sub2	2014-12-30	47	3	0.29	90	ur	3.59	3.802	6.0257	3.802	4.2659	3.802	4.2659	3.802	4.7864	2.3989	3.02
Sub2	2014-12-30	47	3	0.29	90	ur	4.52	4.7864	6.0257	4.7864	5.3704	4.2659	4.7864	4.2659	4.7864	4.2659	4.7864
Sub2	2014-12-30	47	3	0.29	90	ur	4.11	12.0228	7.5859	9.5501	3.802	4.7864	3.802	4.7864	3.802	4.7864	3.02
Sub2	2014-12-30	47	3	0.29	90	ur	3.95	7.5859	9.5501	4.2659	5.3704	3.802	4.2659	3.802	4.2659	3.3885	4.2659
Sub2	2014-12-30	47	3	0.29	90	ur	2.96	4.7864	7.5859	2.138	2.3989	2.138	3.3885	2.6916	3.3885	3.02	3.3885
Sub2	2014-12-30	47	3	0.29	90	ur	2.69	4.7864	6.0257	4.7864	5.3704	4.2659	5.3704	2.138	2.3989	1.6983	1.9055
Sub2	2014-12-30	47	3	0.29	90	ur	2.49	2.3989	3.02	1.9055	3.02	2.3989	3.02	2.3989	2.6916	2.138	2.3989
Sub2	2015-01-01	47	3	0.29	90	ur	3.32	4.7864	6.0257	4.7864	5.3704	3.3885	3.802	3.02	3.3885	3.02	3.3885
Sub2	2015-01-01	47	3	0.29	90	ur	4.7	6.0257	9.5501	6.7609	7.5859	4.2659	4.7864	4.2659	5.3704	4.2659	5.3704
Sub2	2015-01-01	47	3	0.29	90	ur	3.88	6.0257	9.5501	5.3704	6.0257	4.2659	4.7864	4.2659	4.7864	2.6916	3.02
Sub2	2015-01-01	47	3	0.29	90	ur	3.32	12.0228	3.802	4.7864	3.802	4.2659	3.02	3.3885	3.02	3.3885	3.02
Sub2	2015-01-01	47	3	0.29	90	ur	5.07	7.5859	9.5501	6.0257	6.7609	4.2659	6.0257	4.7864	5.3704	4.7864	5.3704
Sub2	2015-01-01	47	3	0.29	90	ur	2.96	6.0257	7.5859	4.7864	5.3704	3.02	3.3885	3.02	3.3885	2.3989	2.6916
Sub2	2015-01-01	47	3	0.29	90	ur	3.2	4.7864	6.0257	4.2659	5.3704	3.3885	4.2659	2.6916	3.3885	2.6916	3.02
Sub2	2015-01-01	47	3	0.29	90	ur	2.85	12.0228	1.5136	2.3989	2.138	3.02	2.6916	3.02	2.138	3.3885	3.02
Sub2	2015-01-01	47	3	0.29	90	ur	2.85	2.3989	6.0257	2.6916	3.02	2.3989	3.02	2.6916	3.02	2.6916	3.3885
Sub2	2015-01-01	47	3	0.29	90	ur	3.45	3.02	3.802	2.3989	3.802	3.3885	4.7864	3.3885	3.802	2.6916	3.02
Sub2	2015-01-01	47	3	0.29	90	ur	3.8	4.7864	6.0257	3.802	4.2659	3.802	4.2659	3.3885	3.802	3.3885	4.2659
Sub2	2015-01-01	47	3	0.29	90	ur	2.26	3.02	3.802	2.3989	3.02	2.138	2.3989	1.9055	3.02	1.9055	2.3989
Sub2	2015-01-01	47	3	0.29	90	ur	2.74	12.0228	2.3989	3.3885	2.6916	3.02	1.9055	3.02	2.3989	3.3885	3.02
Sub2	2015-01-01	47	3	0.29	90	ur	2.74	3.02	3.802	2.138	2.6916	2.3989	3.02	2.3989	3.02	2.6916	3.02
Sub2	2015-01-02	47	3	0.29	90	ur	2.74	3.802	4.7864	3.3885	4.7864	3.02	3.3885	2.3989	2.6916	2.3989	2.6916
Sub2	2015-01-02	47	3	0.29	90	ur	2.26	6.0257	7.5859	3.3885	3.802	2.3989	2.6916	2.138	2.3989	1.9055	2.138
Sub2	2015-01-02	47	3	0.29	90	ur	1.63	3.02	3.802	1.9055	2.138	1.349	1.5136	1.349	2.6916	1.5136	1.6983
Sub2	2015-01-02	47	3	0.29	90	ur	4.18	6.0257	7.5859	4.7864	5.3704	4.2659	4.7864	3.802	4.2659	3.802	4.2659
Sub2	2015-01-02	47	3	0.29	90	ur	2.69	4.7864	6.0257	3.02	4.2659	3.02	3.3885	2.138	2.6916	2.3989	2.6916
Sub2	2015-01-02	47	3	0.29	90	ur	3.95	3.802	6.0257	3.802	4.2659	3.802	4.2659	3.802	4.2659	3.3885	4.2659
Sub2	2015-01-02	47	3	0.29	90	ur	3.08	4.7864	6.0257	2.3989	3.02	2.3989	3.3885	3.02	3.802	2.6916	3.3885
Sub2	2015-01-02	47	3	0.29	90	ur	2.26	7.5859	9.5501	4.2659	5.3704	2.6916	3.3885	1.2023	2.3989	2.138	2.3989
Sub2	2015-01-02	47	3	0.29	90	ur	2.26	3.802	4.7864	3.3885	3.802	2.3989	2.6916	2.138	2.3989	1.9055	2.138
Sub2	2015-01-02	47	3	0.29	90	ur	2.1	1.5136	2.3989	1.9055	2.3989	2.138	2.3989	1.9055	2.138	1.9055	2.138
Sub2	2015-01-02	47	3	0.29	90	ur	1.98	3.802	4.7864	2.3989	2.6916	2.3989	2.6916	1.9055	2.3989	1.349	1.5136
Sub2	2015-01-02	47	3	0.29	90	ur	3.08	6.0257	7.5859	3.02	3.802	3.3885	3.802	2.6916	3.02	2.6916	3.02
Sub2	2015-01-02	47	3	0.29	90	ur	2.54	1.5136	2.3989	1.9055	3.802	2.3989	2.6916	2.3989	2.6916	2.3989	2.6916
Sub2	2015-01-03	47	3	0.29	90	ur	3.32	6.0257	7.5859	4.7864	5.3704	4.2659	4.7864	2.6916	3.02	2.6916	3.02
Sub2	2015-01-03	47	3	0.29	90	ur	1.76	1.9055	2.3989	1.5136	1.6983	1.5136	1.9055	1.6983	1.9055	1.5136	2.138
Sub2	2015-01-03	47	3	0.29	90	ur	2.22	4.7864	6.0257	2.3989	2.6916	2.3989	2.6916	2.138	2.6916	1.6983	1.9055
Sub2	2015-01-03	47	3	0.29	90	ur	2.35	2.3989	3.02	2.138	2.6916	2.3989	2.6916	2.138	2.3989	2.138	2.3989
Sub2	2015-01-03	47	3	0.29	90	ur	1.14	1.2023	1.9055	1.0715	1.2023	1.0715	1.2023	1.0715	1.2023	1.0715	1.2023
Sub2	2015-01-03	47	3	0.29	90	ur	2.06	4.7864	6.0257	4.7864	5.3704	1.9055	2.3989	2.138	2.3989	1.6983	1.9055
Sub2	2015-01-03	47	3	0.29	90	ur	2.02	1.5136	1.9055	1.349	2.138	1.6983	1.9055	1.6983	2.3989	2.138	2.3989
Sub2	2015-01-03	47	3	0.29	90	ur	2.45	2.3989	3.802	2.6916	3.02	2.138	2.3989	2.138	2.6916	2.3989	3.02
Sub2	2015-01-03	47	3	0.29	90	ur	2.26	1.9055	2.3989	1.9055	2.138	1.9055	2.3989	2.138	2.3989	2.138	2.6916
Sub2	2015-01-03	47	3	0.29	90	ur	2.45	1.9055	2.3989	1.9055	2.138	1.9055	2.6916	2.3989	2.6916	2.3989	2.6916
Sub2	2015-01-03	47	3	0.29	90	ur	2.14	3.802	4.7864	2.6916	3.02	2.138	2.3989	1.9055	2.138	1.9055	2.3989
Sub2	2015-01-03	47	3	0.29	90	ur	3.39	3.02	3.802	3.02	3.3885	2.3989	3.802	3.3885	3.802	3.3885	3.802
Sub2	2015-01-03	47	3	0.29	90	ur	1.54	2.3989	3.802	3.02	3.3885	1.349	1.5136	1.349	1.6983	1.5136	1.9055
Sub2	2015-01-04	47	3	0.29	90	ur	5.17	7.5859	9.5501	6.0257	6.7609	5.3704	6.0257	5.3704	7.5859	3.3885	4.2659
Sub2	2015-01-04	47	3	0.29	90	ur	4.7	4.7864	7.5859	6.0257	6.7609	6.0257	6.7609	5.3704	6.0257	2.6916	3.02
Sub2	2015-01-04	47	3	0.29	90	ur	2.14	2.3989	3.02	2.138	3.3885	1.6983	2.6916	2.138	2.3989	1.9055	2.138
Sub2	2015-01-04	47	3	0.29	90	ur	5.8	6.0257	9.5501	5.3704	6.0257	5.3704	6.7609	5.3704	6.0257	5.3704	6.0257
Sub2	2015-01-04	47	3	0.29	90	ur	2.31	2.3989	3.802	2.6916	3.02	2.138	2.3989	1.9055	2.6916	2.138	2.6916
Sub2	2015-01-04	47	3	0.29	90	dl	2.74	3.802	4.7864	3.802	4.2659	2.3989	3.02	2.6916	3.02	2.3989	3.02
Sub2	2015-01-04	47	3	0.29	90	dl	3.66	4.7864	6.0257	3.802	4.2659	3.802	4.2659	3.3885	3.802	3.02	3.802
Sub2	2015-01-04	47	3	0.29	90	dl	4.35	7.5859	9.5501	5.3704	6.0257	5.3704	6.0257	3.3885	3.802	3.3885	4.7864
Sub2	2015-01-04	47	3	0.29	90	dl	2.85	1.9055	3.802	3.02	3.802	3.02	3.3885	2.6916	3.02	2.3989	2.6916
Sub2	2015-01-04	47	3	0.29	90	dl	2.4	12.0228	2.3989	3.02	2.3989	2.6916	2.138	2.6916	2.3989	2.6916	1.9055
Sub3	2014-12-25	47	3	0.29	90	ul	4.7	3.802	7.5859	4.7864	5.3704	4.7864	5.3704	4.7864	5.3704	3.802	4.2659
Sub3	2014-12-25	47	3	0.29	90	ul	5.58	4.7864	6.0257	4.7864	9.5501	5.3704	6.7609	5.3704	6.0257	4.7864	5.3704
Sub3	2014-12-25	47	3	0.29	90	ul	4.35	3.02	4.7864	3.802	4.7864	4.2659	4.7864	4.2659	4.7864	3.802	4.2659
Sub3	2014-12-25	47	3	0.29	90	ul	4.35	4.7864	6.0257	2.3989	3.3885	3.02	4.2659	3.802	6.7609	4.2659	4.7864
Sub3	2014-12-25	47	3	0.29	90	ul	4.79	6.0257	7.5859	4.7864	5.3704	4.7864	6.0257	5.3704	6.0257	3.02	4.2659
Sub3	2014-12-25	47	3	0.29	90	dr	7.44	6.0257	7.5859	4.7864	7.5859	6.7609	8.5115	6.7609	7.5859	6.7609	8.5115
Sub3	2014-12-25	47	3	0.29	90	dr	5.58	3.802	4.7864	3.802	5.3704	4.7864	6.0257	5.3704	6.7609	4.7864	6.0257
Sub3	2014-12-25	47	3	0.29	90	dr	5.37	3.802	6.0257	4.7864	5.3704	4.7864	5.3704	4.7864	6.0257	5.3704	6.0257
Sub3	2014-12-25	47	3	0.29	90	dr	5.37	4.7864	6.0257	3.802	4.7864	4.2659	4.7864	4.2659	6.7609	5.3704	7.5859
Sub3	2014-12-25	47	3	0.29	90	dr	3.02	3.02	6.0257	3.3885	3.802	2.6916	3.3885	2.138	3.3885	3.02	3.802
Sub3	2014-12-29	47	3	0.29	90	ul	5.69	6.0257	7.5859	5.3704	6.0257	4.7864	6.0257	5.3704	6.0257	5.3704	6.7609
Sub3	2014-12-29	47	3	0.29	90	ul	5.47	4.7864	7.5859	6.0257	6.7609	5.3704	6.0257	5.3704	6.0257	4.7864	5.3704
Sub3	2014-12-29	47	3	0.29	90	ul	5.27	6.0257	7.5859	6.0257	6.7609	6.0257	6.7609	4.7864	5.3704	4.2659	4.7864
Sub3	2014-12-29	47	3	0.29	90	ul	4.27	6.0257	7.5859	6.0257	7.5859	5.3704	6.0257	3.3885	3.802	3.02	4.7864
Sub3	2014-12-29	47	3	0.29	90	ul	5.91	4.7864	6.0257	4.7864	5.3704	4.7864	7.5859	5.3704	6.7609	5.3704	6.0257
Sub3	2014-12-29	47	3	0.29	90	ul	5.17	4.7864	6.0257	4.7864	6.0257	4.7864	5.3704	4.7864	6.0257	4.7864	5.3704
Sub3	2014-12-29	47	3	0.29	90	ul	6.51	4.7864	6.0257	4.7864	6.7609	6.0257	6.7609	6.0257	6.7609	6.0257	7.5859
Sub3	2014-12-29	47	3	0.29	90	ul	6.26	9.5501	6.0257	7.5859	6.7609	7.5859	6.0257	6.7609	5.3704	6.7609	5.3704
Sub3	2014-12-29	47	3	0.29	90	ul	7.59	12.0228	6.0257	8.5115	4.7864	6.7609	5.3704	6.0257	5.3704	13.4898	12.0228
Sub3	2014-12-29	47	3	0.29	90	ul	4.97	6.0257	7.5859	6.0257	6.7609	4.7864	5.3704	4.7864	6.0257	4.2659	4.7864
Sub3	2014-12-29	47	3	0.29	90	ul	5.69	6.0257	7.5859	6.0257	7.5859	4.7864	6.0257	5.3704	6.0257	5.3704	6.7609
Sub3	2014-12-29	47	3	0.29	90	ul	5.58	9.5501	6.0257	8.5115	5.3704	6.0257	4.7864	6.0257	5.3704	6.0257	5.3704
Sub3	2014-12-29	47	3	0.29	90	ul	3.08	2.3989	3.02	2.3989	3.3885	3.02	3.3885	2.3989	2.6916	2.3989	5.3704
Sub3	2014-12-29	47	3	0.29	90	ul	4.79	4.7864	6.0257	4.2659	4.7864	4.2659	5.3704	4.7864	5.3704	4.2659	4.7864
Sub3	2014-12-29	47	3	0.29	90	ul	5.37	6.0257	7.5859	5.3704	6.0257	5.3704	6.0257	4.7864	5.3704	4.7864	6.0257
Sub3	2015-01-03	47	3	0.29	90	ul	4.97	4.7864	6.0257	4.7864	6.0257	5.3704	6.7609	4.2659	4.7864	4.2659	4.7864
Sub3	2015-01-03	47	3	0.29	90	ul	3.66	3.02	6.0257	4.2659	4.7864	3.3885	3.802	3.3885	3.802	3.3885	4.2659
Sub3	2015-01-03	47	3	0.29	90	ul	2.4	1.2023	3.02	2.3989	2.6916	2.138	2.6916	2.138	2.3989	2.138	3.02
Sub3	2015-01-03	47	3	0.29	90	ul	3.08	4.7864	7.5859	3.3885	4.2659	3.02	3.3885	3.02	3.3885	2.6916	3.02
Sub3	2015-01-03	47	3	0.29	90	ul	3.08	9.5501	4.7864	6.7609	4.2659	4.7864	3.02	3.3885	2.138	3.02	2.6916
Sub3	2015-01-03	47	3	0.29	90	ul	3.39	9.5501	4.7864	6.0257	3.02	3.802	3.02	3.3885	3.02	3.802	3.3885
Sub3	2015-01-03	47	3	0.29	90	ul	4.27	3.802	4.7864	3.802	4.7864	4.2659	5.3704	3.3885	3.802	3.3885	6.0257
Sub3	2015-01-03	47	3	0.29	90	ul	4.11	4.7864	7.5859	3.802	4.2659	3.802	4.7864	4.2659	4.7864	3.3885	3.802
Sub3	2015-01-03	47	3	0.29	90	ul	3.26	3.02	3.802	3.02	5.3704	4.7864	5.3704	2.6916	3.02	2.138	2.6916
Sub3	2015-01-03	47	3	0.29	90	ul	6.63	4.7864	7.5859	6.0257	7.5859	6.7609	7.5859	6.7609	7.5859	5.3704	6.0257
Sub3	2015-01-03	47	3	0.29	90	ul	4.7	4.7864	7.5859	6.0257	7.5859	6.0257	6.7609	4.2659	4.7864	3.3885	3.802
Sub3	2015-01-03	47	3	0.29	90	ul	3.39	6.0257	7.5859	4.7864	6.0257	3.3885	4.2659	3.802	4.7864	1.9055	3.02
Sub3	2015-01-06	47	3	0.29	90	ul	4.35	4.7864	6.0257	4.2659	4.7864	3.3885	4.7864	4.2659	4.7864	4.2659	4.7864
Sub3	2015-01-06	47	3	0.29	90	ul	4.35	9.5501	3.02	5.3704	4.7864	6.0257	4.7864	5.3704	3.3885	3.802	3.3885
Sub3	2015-01-06	47	3	0.29	90	ul	4.79	4.7864	7.5859	4.7864	5.3704	3.802	4.2659	3.802	5.3704	4.2659	8.5115
Sub3	2015-01-06	47	3	0.29	90	ul	4.97	4.7864	6.0257	4.7864	6.0257	5.3704	6.0257	4.7864	5.3704	3.802	4.7864
Sub3	2015-01-06	47	3	0.29	90	ul	4.03	4.7864	6.0257	4.2659	5.3704	3.3885	3.802	3.3885	4.7864	4.2659	4.7864
Sub3	2015-01-06	47	3	0.29	90	ul	4.7	3.802	6.0257	4.2659	4.7864	3.802	6.0257	3.802	6.0257	4.2659	4.7864
Sub3	2015-01-06	47	3	0.29	90	ul	4.52	3.802	4.7864	3.3885	4.2659	3.802	6.7609	6.0257	7.5859	2.3989	3.02
Sub3	2015-01-06	47	3	0.29	90	ul	3.88	9.5501	3.02	3.802	3.02	4.2659	3.802	4.2659	3.3885	4.2659	3.3885
Sub3	2015-01-06	47	3	0.29	90	ul	3.59	2.3989	3.802	3.02	3.3885	2.6916	3.02	2.6916	4.7864	4.2659	4.7864
Sub3	2015-01-06	47	3	0.29	90	ul	4.27	4.7864	7.5859	6.0257	6.7609	4.7864	5.3704	3.3885	3.802	3.3885	5.3704
Sub3	2015-01-06	47	3	0.29	90	ul	3.14	3.02	3.802	2.3989	3.3885	2.6916	3.3885	3.02	3.3885	2.6916	3.802
Sub3	2015-01-06	47	3	0.29	90	ul	3.32	4.7864	6.0257	4.2659	4.7864	3.3885	3.802	3.02	3.3885	2.3989	4.2659
Sub3	2015-01-06	47	3	0.29	90	ul	3.45	4.7864	7.5859	3.802	4.7864	2.6916	4.7864	3.3885	3.802	3.02	3.3885
Sub3	2015-01-06	47	3	0.29	90	ul	2.85	4.7864	6.0257	3.3885	4.2659	3.3885	3.802	2.6916	3.02	2.138	2.3989
Sub3	2015-01-07	47	3	0.29	90	ul	4.18	9.5501	7.5859	9.5501	6.0257	7.5859	3.3885	3.802	3.3885	4.2659	3.802
Sub3	2015-01-07	47	3	0.29	90	ul	2.4	2.3989	3.02	2.138	2.3989	2.138	2.3989	2.138	2.6916	2.3989	2.6916
Sub3	2015-01-07	47	3	0.29	90	ul	4.43	4.7864	6.0257	4.7864	6.0257	4.2659	4.7864	4.2659	6.0257	3.3885	4.2659
Sub3	2015-01-07	47	3	0.29	90	ul	3.08	6.0257	7.5859	4.2659	4.7864	3.02	3.3885	3.02	3.3885	2.6916	3.02
Sub3	2015-01-07	47	3	0.29	90	ul	4.27	6.0257	7.5859	4.7864	5.3704	4.2659	4.7864	3.802	4.2659	3.802	4.7864
Sub3	2015-01-07	47	3	0.29	90	ul	3.26	3.802	4.7864	3.802	4.2659	3.3885	3.802	2.3989	3.3885	3.02	3.802
Sub3	2015-01-07	47	3	0.29	90	ul	1.98	9.5501	3.02	4.2659	3.02	3.802	1.5136	1.9055	1.349	2.138	1.9055
Sub3	2015-01-07	47	3	0.29	90	ul	3.52	6.0257	7.5859	6.0257	8.5115	3.802	4.2659	3.02	3.802	3.02	3.3885
Sub3	2015-01-07	47	3	0.29	90	ul	4.35	3.802	4.7864	3.3885	5.3704	4.7864	6.0257	3.3885	4.2659	3.802	4.2659
Sub3	2015-01-07	47	3	0.29	90	ul	5.37	4.7864	9.5501	4.2659	6.0257	5.3704	6.0257	4.7864	5.3704	4.7864	6.0257
Sub3	2015-01-07	47	3	0.29	90	ul	4.11	9.5501	7.5859	9.5501	6.7609	7.5859	3.02	3.802	3.3885	4.2659	3.802
Sub3	2015-01-07	47	3	0.29	90	ul	4.79	6.0257	7.5859	6.0257	6.7609	5.3704	6.0257	3.802	4.7864	4.2659	4.7864
Sub3	2015-01-07	47	3	0.29	90	ul	7.88	3.802	7.5859	5.3704	6.7609	5.3704	8.5115	7.5859	9.5501	7.5859	9.5501
Sub3	2015-01-07	47	3	0.29	90	ul	6.03	3.802	6.0257	4.2659	5.3704	4.7864	6.7609	6.0257	6.7609	5.3704	6.7609
Sub3	2015-01-08	47	3	0.29	90	ul	3.66	3.802	6.0257	3.802	5.3704	4.2659	6.0257	2.6916	3.3885	3.02	3.3885
Sub3	2015-01-08	47	3	0.29	90	ul	2.91	12.0228	3.02	3.802	2.6916	3.02	2.6916	3.3885	3.02	3.3885	2.138
Sub3	2015-01-08	47	3	0.29	90	ul	4.52	6.0257	7.5859	5.3704	6.0257	4.7864	5.3704	4.2659	4.7864	3.802	4.2659
Sub3	2015-01-08	47	3	0.29	90	ul	3.88	3.802	4.7864	3.3885	4.2659	3.3885	4.7864	3.02	3.802	3.3885	5.3704
Sub3	2015-01-08	47	3	0.29	90	ul	4.7	6.0257	7.5859	3.3885	4.2659	3.802	4.7864	4.2659	5.3704	4.7864	5.3704
Sub3	2015-01-08	47	3	0.29	90	ul	2.59	6.0257	7.5859	4.7864	5.3704	3.3885	3.802	1.9055	2.3989	2.138	2.3989
Sub3	2015-01-08	47	3	0.29	90	ul	5.8	3.802	7.5859	5.3704	6.0257	5.3704	6.0257	5.3704	6.7609	5.3704	6.0257
Sub3	2015-01-08	47	3	0.29	90	ul	3.88	3.802	4.7864	3.802	4.7864	3.802	4.2659	3.802	4.2659	3.3885	3.802
Sub3	2015-01-08	47	3	0.29	90	ul	4.18	6.0257	7.5859	4.7864	6.0257	3.3885	4.7864	4.2659	4.7864	3.802	4.2659
Sub3	2015-01-08	47	3	0.29	90	ul	4.03	4.7864	6.0257	4.7864	5.3704	4.7864	6.0257	3.3885	3.802	3.02	3.802
Sub3	2015-01-08	47	3	0.29	90	ul	3.8	4.7864	6.0257	4.7864	5.3704	4.7864	6.0257	3.02	3.3885	3.02	3.3885
Sub3	2015-01-08	47	3	0.29	90	ul	2.22	6.0257	7.5859	5.3704	6.0257	2.6916	3.02	1.6983	2.138	1.9055	2.138
Sub3	2015-01-08	47	3	0.29	90	ul	4.97	6.0257	9.5501	5.3704	6.0257	4.7864	6.7609	4.2659	4.7864	4.2659	5.3704
Sub3	2015-01-08	47	3	0.29	90	ul	3.2	6.0257	7.5859	3.802	4.2659	3.02	3.3885	3.02	3.3885	3.02	3.3885
Sub3	2015-01-10	47	3	0.29	90	ul	4.52	4.7864	6.0257	4.2659	5.3704	4.2659	4.7864	4.2659	4.7864	4.2659	4.7864
Sub3	2015-01-10	47	3	0.29	90	ul	4.03	4.7864	7.5859	4.7864	5.3704	3.802	4.2659	3.802	5.3704	3.3885	3.802
Sub3	2015-01-10	47	3	0.29	90	ul	5.47	9.5501	6.0257	7.5859	5.3704	7.5859	4.2659	6.7609	4.2659	6.0257	4.7864
Sub3	2015-01-10	47	3	0.29	90	ul	4.11	4.7864	6.0257	4.7864	5.3704	3.3885	4.7864	4.2659	5.3704	3.3885	3.802
Sub3	2015-01-10	47	3	0.29	90	ul	2.91	2.3989	3.02	2.138	2.3989	2.138	3.02	2.6916	3.3885	3.02	3.3885
Sub3	2015-01-10	47	3	0.29	90	dr	2.8	6.0257	7.5859	2.3989	2.6916	2.3989	3.02	2.6916	3.02	2.6916	3.02
Sub3	2015-01-10	47	3	0.29	90	dr	4.61	4.7864	6.0257	4.2659	5.3704	4.7864	5.3704	4.2659	4.7864	3.802	4.7864
Sub3	2015-01-10	47	3	0.29	90	dr	6.38	6.0257	9.5501	6.7609	8.5115	6.0257	6.7609	6.0257	6.7609	5.3704	7.5859
Sub3	2015-01-10	47	3	0.29	90	dr	3.45	4.7864	7.5859	3.802	4.2659	3.3885	3.802	3.3885	3.802	2.6916	3.802
Sub3	2015-01-10	47	3	0.29	90	dr	5.07	6.0257	7.5859	4.7864	5.3704	4.7864	5.3704	4.7864	5.3704	4.7864	5.3704
Sub4	2014-12-29	47	3	0.29	90	ur	10.12	10.7154	16.9827	9.5501	16.9827	12.0228	15.1358	8.5115	10.7154	7.5859	8.5115
Sub4	2014-12-29	47	3	0.29	90	ur	9.37	8.5115	10.7154	7.5859	10.7154	6.7609	9.5501	8.5115	10.7154	9.5501	12.0228
Sub4	2014-12-29	47	3	0.29	90	ur	14.85	6.7609	13.4898	10.7154	15.1358	13.4898	15.1358	13.4898	19.0549	13.4898	15.1358
Sub4	2014-12-29	47	3	0.29	90	ur	10.12	10.7154	16.9827	13.4898	15.1358	9.5501	10.7154	7.5859	10.7154	9.5501	13.4898
Sub4	2014-12-29	47	3	0.29	90	ur	8.19	5.3704	8.5115	6.0257	7.5859	6.7609	10.7154	6.7609	8.5115	7.5859	9.5501
Sub4	2014-12-29	47	3	0.29	90	dl	9.02	16.9827	10.7154	13.4898	7.5859	10.7154	9.5501	10.7154	7.5859	8.5115	7.5859
Sub4	2014-12-29	47	3	0.29	90	dl	9.92	8.5115	10.7154	8.5115	9.5501	8.5115	9.5501	8.5115	13.4898	9.5501	10.7154
Sub4	2014-12-29	47	3	0.29	90	dl	9.74	10.7154	13.4898	10.7154	12.0228	9.5501	10.7154	8.5115	12.0228	8.5115	9.5501
Sub4	2014-12-29	47	3	0.29	90	dl	6.14	5.3704	6.7609	3.3885	4.7864	4.2659	7.5859	6.0257	6.7609	6.0257	6.7609
Sub4	2014-12-29	47	3	0.29	90	dl	10.51	6.7609	16.9827	10.7154	13.4898	10.7154	12.0228	10.7154	12.0228	8.5115	9.5501
Sub4	2014-12-30	47	3	0.29	90	ur	13.75	10.7154	13.4898	9.5501	12.0228	10.7154	13.4898	12.0228	19.0549	13.4898	15.1358
Sub4	2014-12-30	47	3	0.29	90	ur	11.79	16.9827	6.7609	10.7154	9.5501	10.7154	9.5501	13.4898	12.0228	13.4898	12.0228
Sub4	2014-12-30	47	3	0.29	90	ur	9.19	6.7609	13.4898	7.5859	9.5501	8.5115	9.5501	8.5115	9.5501	8.5115	10.7154
Sub4	2014-12-30	47	3	0.29	90	ur	9.92	10.7154	16.9827	10.7154	15.1358	9.5501	10.7154	9.5501	10.7154	8.5115	10.7154
Sub4	2014-12-30	47	3	0.29	90	ur	10.12	10.7154	13.4898	7.5859	9.5501	8.5115	12.0228	9.5501	10.7154	8.5115	12.0228
Sub4	2014-12-30	47	3	0.29	90	ur	7.73	6.7609	10.7154	6.7609	8.5115	7.5859	9.5501	7.5859	9.5501	6.0257	6.7609
Sub4	2014-12-30	47	3	0.29	90	ur	11.79	10.7154	13.4898	9.5501	10.7154	9.5501	13.4898	10.7154	15.1358	10.7154	12.0228
Sub4	2014-12-30	47	3	0.29	90	ur	11.13	8.5115	13.4898	9.5501	10.7154	9.5501	10.7154	9.5501	12.0228	10.7154	15.1358
Sub4	2014-12-30	47	3	0.29	90	ur	6.76	8.5115	10.7154	7.5859	8.5115	6.7609	8.5115	7.5859	8.5115	4.7864	5.3704
Sub4	2014-12-30	47	3	0.29	90	ur	10.92	6.7609	16.9827	13.4898	16.9827	13.4898	15.1358	13.4898	15.1358	6.0257	6.7609
Sub4	2014-12-30	47	3	0.29	90	ur	10.72	16.9827	8.5115	10.7154	9.5501	12.0228	10.7154	12.0228	9.5501	10.7154	9.5501
Sub4	2014-12-30	47	3	0.29	90	ur	8.35	8.5115	10.7154	8.5115	9.5501	8.5115	9.5501	8.5115	9.5501	6.7609	7.5859
Sub4	2014-12-30	47	3	0.29	90	ur	6.63	16.9827	5.3704	7.5859	6.7609	7.5859	6.7609	7.5859	6.0257	6.7609	5.3704
Sub4	2014-12-30	47	3	0.29	90	ur	8.84	8.5115	10.7154	8.5115	9.5501	7.5859	9.5501	8.5115	9.5501	8.5115	9.5501
Sub4	2014-12-31	47	3	0.29	90	ur	7.88	8.5115	13.4898	6.0257	6.7609	4.7864	8.5115	7.5859	12.0228	6.7609	9.5501
Sub4	2014-12-31	47	3	0.29	90	ur	4.88	3.3885	4.2659	3.3885	5.3704	4.7864	5.3704	3.3885	4.7864	4.2659	7.5859
Sub4	2014-12-31	47	3	0.29	90	ur	8.51	10.7154	13.4898	6.0257	8.5115	6.7609	9.5501	7.5859	8.5115	7.5859	12.0228
Sub4	2014-12-31	47	3	0.29	90	ur	4.18	6.7609	8.5115	4.2659	5.3704	4.2659	4.7864	4.2659	4.7864	3.3885	3.802
Sub4	2014-12-31	47	3	0.29	90	ur	4.52	5.3704	13.4898	9.5501	10.7154	8.5115	10.7154	3.02	3.802	2.6916	3.02
Sub4	2014-12-31	47	3	0.29	90	ur	5.37	5.3704	6.7609	4.7864	5.3704	4.7864	5.3704	4.7864	6.0257	5.3704	6.0257
Sub4	2014-12-31	47	3	0.29	90	ur	4.7	8.5115	10.7154	6.7609	8.5115	6.0257	6.7609	3.802	4.2659	3.802	4.2659
Sub4	2014-12-31	47	3	0.29	90	ur	5.8	6.7609	8.5115	6.0257	6.7609	6.0257	6.7609	5.3704	6.0257	4.7864	6.0257
Sub4	2014-12-31	47	3	0.29	90	ur	9.02	10.7154	13.4898	9.5501	12.0228	9.5501	10.7154	7.5859	9.5501	7.5859	9.5501
Sub4	2014-12-31	47	3	0.29	90	ur	3.32	3.3885	5.3704	4.2659	4.7864	3.802	4.2659	3.3885	3.802	2.3989	2.6916
Sub4	2014-12-31	47	3	0.29	90	ur	4.88	6.7609	8.5115	6.7609	9.5501	5.3704	6.0257	4.2659	4.7864	4.2659	4.7864
Sub4	2014-12-31	47	3	0.29	90	ur	4.18	5.3704	10.7154	8.5115	9.5501	5.3704	6.0257	3.3885	3.802	3.3885	3.802
Sub4	2014-12-31	47	3	0.29	90	ur	4.18	8.5115	10.7154	7.5859	8.5115	4.7864	7.5859	3.3885	4.2659	2.6916	3.802
Sub4	2015-01-01	47	3	0.29	90	ur	6.51	4.2659	5.3704	4.2659	6.7609	6.0257	6.7609	6.0257	6.7609	6.0257	7.5859
Sub4	2015-01-01	47	3	0.29	90	ur	2.69	2.6916	3.3885	2.6916	3.3885	2.6916	3.02	2.3989	2.6916	2.3989	3.02
Sub4	2015-01-01	47	3	0.29	90	ur	7.44	8.5115	13.4898	6.7609	8.5115	6.0257	7.5859	6.7609	8.5115	7.5859	8.5115
Sub4	2015-01-01	47	3	0.29	90	ur	8.35	5.3704	6.7609	5.3704	8.5115	7.5859	9.5501	7.5859	8.5115	7.5859	9.5501
Sub4	2015-01-01	47	3	0.29	90	ur	5.58	8.5115	10.7154	7.5859	8.5115	7.5859	8.5115	4.7864	5.3704	3.802	4.7864
Sub4	2015-01-01	47	3	0.29	90	ur	5.58	16.9827	8.5115	13.4898	6.7609	7.5859	6.0257	6.7609	4.7864	5.3704	3.802
Sub4	2015-01-01	47	3	0.29	90	ur	8.04	8.5115	13.4898	10.7154	13.4898	10.7154	12.0228	6.7609	7.5859	6.0257	6.7609
Sub4	2015-01-01	47	3	0.29	90	ur	4.11	2.6916	8.5115	3.3885	3.802	3.3885	4.7864	4.2659	4.7864	3.3885	4.2659
Sub4	2015-01-01	47	3	0.29	90	ur	9.02	16.9827	8.5115	10.7154	9.5501	10.7154	8.5115	9.5501	8.5115	9.5501	7.5859
Sub4	2015-01-01	47	3	0.29	90	ur	14.29	16.9827	13.4898	16.9827	13.4898	15.1358	13.4898	16.9827	13.4898	15.1358	12.0228
Sub4	2015-01-01	47	3	0.29	90	ur	5.27	8.5115	10.7154	6.0257	7.5859	6.0257	7.5859	4.2659	4.7864	4.2659	5.3704
Sub4	2015-01-01	47	3	0.29	90	ur	4.61	4.2659	5.3704	4.2659	4.7864	3.802	7.5859	4.2659	4.7864	3.802	4.2659
Sub4	2015-01-01	47	3	0.29	90	ur	4.97	5.3704	8.5115	6.7609	7.5859	6.0257	6.7609	4.2659	4.7864	3.802	4.7864
Sub4	2015-01-01	47	3	0.29	90	ur	4.52	6.7609	8.5115	4.7864	5.3704	4.7864	6.0257	3.802	4.2659	3.802	4.7864
Sub4	2015-01-02	47	3	0.29	90	ur	8.19	8.5115	16.9827	12.0228	13.4898	7.5859	8.5115	7.5859	8.5115	7.5859	9.5501
Sub4	2015-01-02	47	3	0.29	90	ur	12.26	21.38	16.9827	21.38	12.0228	15.1358	13.4898	15.1358	13.4898	15.1358	5.3704
Sub4	2015-01-02	47	3	0.29	90	ur	7.44	10.7154	13.4898	7.5859	10.7154	7.5859	8.5115	7.5859	8.5115	6.0257	6.7609
Sub4	2015-01-02	47	3	0.29	90	ur	7.16	8.5115	10.7154	6.7609	9.5501	6.7609	7.5859	6.7609	7.5859	6.7609	7.5859
Sub4	2015-01-02	47	3	0.29	90	ur	6.38	10.7154	13.4898	5.3704	6.7609	6.0257	6.7609	6.0257	6.7609	6.0257	6.7609
Sub4	2015-01-02	47	3	0.29	90	ur	5.27	16.9827	10.7154	13.4898	6.7609	7.5859	5.3704	6.0257	4.7864	5.3704	3.3885
Sub4	2015-01-02	47	3	0.29	90	ur	4.88	8.5115	13.4898	10.7154	15.1358	7.5859	8.5115	4.2659	6.0257	2.6916	3.02
Sub4	2015-01-02	47	3	0.29	90	ur	7.16	6.7609	13.4898	10.7154	12.0228	9.5501	10.7154	6.0257	6.7609	5.3704	6.0257
Sub4	2015-01-02	47	3	0.29	90	ur	3.59	4.2659	6.7609	3.802	4.7864	4.2659	4.7864	3.3885	3.802	2.6916	3.02
Sub4	2015-01-02	47	3	0.29	90	ur	8.51	8.5115	10.7154	7.5859	8.5115	6.7609	8.5115	7.5859	9.5501	8.5115	10.7154
Sub4	2015-01-02	47	3	0.29	90	ur	8.04	10.7154	13.4898	7.5859	8.5115	6.7609	9.5501	6.7609	9.5501	7.5859	8.5115
Sub4	2015-01-02	47	3	0.29	90	ur	7.73	10.7154	13.4898	9.5501	10.7154	8.5115	12.0228	4.7864	7.5859	6.7609	8.5115
Sub4	2015-01-02	47	3	0.29	90	ur	7.73	16.9827	6.7609	8.5115	7.5859	8.5115	7.5859	8.5115	7.5859	8.5115	6.0257
Sub4	2015-01-02	47	3	0.29	90	ur	4.88	8.5115	10.7154	7.5859	8.5115	4.7864	5.3704	4.2659	4.7864	4.2659	6.0257
Sub4	2015-01-03	47	3	0.29	90	ur	7.88	6.7609	10.7154	7.5859	8.5115	7.5859	9.5501	8.5115	9.5501	6.0257	6.7609
Sub4	2015-01-03	47	3	0.29	90	ur	5.37	16.9827	10.7154	13.4898	6.0257	6.7609	5.3704	6.0257	5.3704	6.0257	3.3885
Sub4	2015-01-03	47	3	0.29	90	ur	3.52	16.9827	3.3885	4.2659	3.802	4.2659	3.802	4.7864	3.3885	3.802	1.9055
Sub4	2015-01-03	47	3	0.29	90	ur	2.96	3.3885	4.2659	2.6916	3.3885	3.02	3.3885	2.6916	3.02	2.6916	3.02
Sub4	2015-01-03	47	3	0.29	90	ur	3.66	5.3704	8.5115	3.802	4.2659	3.3885	3.802	3.3885	3.802	3.3885	4.2659
Sub4	2015-01-03	47	3	0.29	90	ur	4.27	3.3885	6.7609	5.3704	6.0257	4.2659	4.7864	4.2659	4.7864	2.6916	5.3704
Sub4	2015-01-03	47	3	0.29	90	ur	5.58	10.7154	13.4898	6.7609	7.5859	6.7609	7.5859	4.7864	5.3704	4.2659	5.3704
Sub4	2015-01-03	47	3	0.29	90	ur	4.43	5.3704	6.7609	4.2659	4.7864	4.2659	5.3704	4.2659	4.7864	3.802	4.2659
Sub4	2015-01-03	47	3	0.29	90	ur	5.27	4.2659	6.7609	5.3704	6.0257	5.3704	6.0257	4.2659	5.3704	4.7864	6.0257
Sub4	2015-01-03	47	3	0.29	90	ur	4.18	2.6916	4.2659	3.3885	4.7864	4.2659	4.7864	3.802	4.2659	3.802	4.2659
Sub4	2015-01-03	47	3	0.29	90	ur	5.47	6.7609	10.7154	5.3704	6.0257	5.3704	7.5859	6.0257	6.7609	3.802	4.2659
Sub4	2015-01-03	47	3	0.29	90	ur	3.26	4.2659	5.3704	3.3885	4.2659	3.3885	4.2659	3.3885	3.802	2.3989	2.6916
Sub4	2015-01-03	47	3	0.29	90	ur	5.91	16.9827	10.7154	13.4898	8.5115	9.5501	5.3704	6.0257	5.3704	6.0257	4.2659
Sub4	2015-01-03	47	3	0.29	90	ur	3.45	8.5115	10.7154	5.3704	6.0257	4.2659	5.3704	2.6916	3.02	2.6916	3.3885
Sub4	2015-01-04	47	3	0.29	90	ur	8.84	16.9827	13.4898	16.9827	12.0228	13.4898	9.5501	10.7154	7.5859	8.5115	5.3704
Sub4	2015-01-04	47	3	0.29	90	ur	4.97	4.2659	5.3704	3.802	5.3704	4.7864	6.0257	4.2659	4.7864	4.2659	6.0257
Sub4	2015-01-04	47	3	0.29	90	ur	3.39	2.138	4.2659	3.3885	3.802	3.3885	3.802	3.02	3.3885	3.02	3.802
Sub4	2015-01-04	47	3	0.29	90	ur	11.35	16.9827	13.4898	16.9827	9.5501	12.0228	10.7154	12.0228	10.7154	12.0228	10.7154
Sub4	2015-01-04	47	3	0.29	90	ur	5.91	8.5115	10.7154	8.5115	10.7154	5.3704	6.7609	6.0257	6.7609	4.7864	6.0257
Sub4	2015-01-04	47	3	0.29	90	ur	5.17	16.9827	6.7609	8.5115	6.0257	6.7609	5.3704	6.0257	4.2659	4.7864	4.2659
Sub4	2015-01-04	47	3	0.29	90	dl	8.35	16.9827	8.5115	10.7154	7.5859	8.5115	7.5859	8.5115	7.5859	10.7154	7.5859
Sub4	2015-01-04	47	3	0.29	90	dl	4.35	16.9827	2.6916	4.2659	3.3885	3.802	3.3885	3.802	3.3885	6.7609	6.0257
Sub4	2015-01-04	47	3	0.29	90	dl	5.8	6.7609	10.7154	6.0257	6.7609	6.0257	6.7609	4.2659	5.3704	4.7864	8.5115
Sub4	2015-01-04	47	3	0.29	90	dl	7.73	8.5115	10.7154	7.5859	8.5115	7.5859	8.5115	7.5859	8.5115	6.7609	7.5859
Sub4	2015-01-04	47	3	0.29	90	dl	6.63	10.7154	21.38	12.0228	13.4898	7.5859	8.5115	6.0257	6.7609	5.3704	6.0257
Sub5	2014-12-30	47	3	0.29	90	dr	9.37	12.0228	7.5859	9.5501	8.5115	10.7154	9.5501	10.7154	7.5859	12.0228	6.7609
Sub5	2014-12-30	47	3	0.29	90	dr	5.37	6.0257	12.0228	6.7609	7.5859	6.0257	6.7609	5.3704	6.7609	3.802	4.2659
Sub5	2014-12-30	47	3	0.29	90	dr	3.66	4.7864	6.0257	4.7864	5.3704	3.3885	3.802	3.3885	3.802	3.3885	4.2659
Sub5	2014-12-30	47	3	0.29	90	dr	3.66	6.0257	7.5859	5.3704	6.0257	3.3885	3.802	3.02	4.2659	3.3885	4.2659
Sub5	2014-12-30	47	3	0.29	90	dr	2.96	6.0257	9.5501	3.02	3.3885	2.3989	3.802	2.3989	3.3885	2.6916	3.3885
Sub5	2014-12-30	47	3	0.29	90	dr	4.43	4.7864	6.0257	4.7864	6.7609	6.0257	6.7609	3.802	4.7864	3.02	3.3885
Sub5	2014-12-30	47	3	0.29	90	ul	6.89	4.7864	12.0228	7.5859	8.5115	6.7609	7.5859	6.7609	7.5859	6.0257	6.7609
Sub5	2014-12-30	47	3	0.29	90	ul	3.8	4.7864	6.0257	4.2659	4.7864	3.3885	3.802	2.6916	4.2659	3.802	5.3704
Sub5	2014-12-30	47	3	0.29	90	ul	4.7	9.5501	4.7864	6.7609	4.2659	6.7609	6.0257	8.5115	3.02	3.3885	3.02
Sub5	2014-12-30	47	3	0.29	90	ul	3.8	3.02	3.802	3.02	3.3885	3.02	3.802	3.3885	4.2659	3.802	4.7864
Sub5	2014-12-30	47	3	0.29	90	ul	3.73	6.0257	7.5859	4.2659	6.0257	3.802	4.2659	3.3885	3.802	3.02	4.2659
Sub5	2014-12-31	47	3	0.29	90	dr	3.26	1.9055	2.3989	1.9055	3.3885	3.02	3.3885	3.02	3.3885	3.02	3.802
Sub5	2014-12-31	47	3	0.29	90	dr	4.43	9.5501	6.0257	7.5859	4.2659	4.7864	4.2659	4.7864	4.2659	4.7864	3.802
Sub5	2014-12-31	47	3	0.29	90	dr	2.74	3.02	4.7864	3.802	4.2659	3.802	4.2659	2.3989	2.6916	1.9055	2.138
Sub5	2014-12-31	47	3	0.29	90	dr	3.52	9.5501	3.802	4.7864	4.2659	4.7864	3.3885	3.802	3.02	3.3885	3.02
Sub5	2014-12-31	47	3	0.29	90	dr	2.85	3.802	4.7864	3.3885	3.802	2.6916	3.02	2.6916	3.02	2.6916	3.02
Sub5	2014-12-31	47	3	0.29	90	dr	2.54	3.802	4.7864	3.802	4.2659	2.6916	3.02	2.3989	2.6916	2.138	2.3989
Sub5	2014-12-31	47	3	0.29	90	dr	2.91	6.0257	7.5859	3.02	3.3885	2.6916	3.02	2.6916	3.02	2.6916	3.3885
Sub5	2014-12-31	47	3	0.29	90	dr	3.8	2.3989	3.802	2.6916	4.7864	2.3989	4.2659	3.802	4.2659	3.802	4.7864
Sub5	2014-12-31	47	3	0.29	90	dr	3.52	3.802	6.0257	4.2659	4.7864	3.02	4.2659	3.02	3.802	3.3885	3.802
Sub5	2014-12-31	47	3	0.29	90	dr	2.26	2.3989	3.02	2.3989	2.6916	2.138	2.3989	2.138	2.3989	2.138	2.3989
Sub5	2014-12-31	47	3	0.29	90	dr	2.64	2.3989	3.802	3.02	3.3885	3.02	3.3885	2.3989	3.02	1.9055	2.3989
Sub5	2014-12-31	47	3	0.29	90	dr	2.14	3.02	3.802	3.02	3.3885	1.9055	2.138	1.9055	2.138	1.9055	3.02
Sub5	2014-12-31	47	3	0.29	90	dr	3.02	3.02	3.802	2.3989	3.02	2.6916	3.02	2.6916	3.3885	3.02	3.3885
Sub5	2014-12-31	47	3	0.29	90	dr	2.69	6.0257	7.5859	1.6983	2.138	1.9055	2.138	1.9055	3.3885	3.02	4.7864
Sub5	2015-01-01	47	3	0.29	90	dr	3.2	9.5501	3.02	3.802	3.3885	3.802	3.02	4.2659	2.3989	3.3885	2.6916
Sub5	2015-01-01	47	3	0.29	90	dr	3.73	3.02	6.0257	4.7864	6.7609	4.7864	5.3704	3.02	3.3885	3.02	3.3885
Sub5	2015-01-01	47	3	0.29	90	dr	2.22	3.802	4.7864	2.138	2.6916	2.138	2.6916	1.9055	2.3989	1.9055	2.3989
Sub5	2015-01-01	47	3	0.29	90	dr	3.2	3.802	6.0257	4.2659	4.7864	3.802	4.2659	3.3885	3.802	2.138	2.3989
Sub5	2015-01-01	47	3	0.29	90	dr	2.14	3.02	3.802	2.6916	3.02	2.138	2.3989	1.9055	2.138	1.9055	2.3989
Sub5	2015-01-01	47	3	0.29	90	dr	1.8	1.9055	2.3989	1.6983	1.9055	1.6983	2.138	1.5136	1.9055	1.6983	1.9055
Sub5	2015-01-01	47	3	0.29	90	dr	3.32	3.802	6.0257	3.3885	4.2659	3.02	3.3885	3.02	3.3885	3.02	4.2659
Sub5	2015-01-01	47	3	0.29	90	dr	2.64	3.02	3.802	2.6916	3.02	2.6916	3.802	2.3989	2.6916	2.138	2.3989
Sub5	2015-01-01	47	3	0.29	90	dr	2.8	4.7864	6.0257	3.3885	4.2659	2.138	2.6916	2.3989	3.3885	3.02	3.3885
Sub5	2015-01-01	47	3	0.29	90	dr	3.32	3.02	4.7864	3.3885	3.802	3.3885	3.802	3.02	3.3885	3.02	3.3885
Sub5	2015-01-01	47	3	0.29	90	dr	3.59	4.7864	6.0257	3.3885	3.802	3.02	4.2659	3.3885	3.802	3.3885	3.802
Sub5	2015-01-01	47	3	0.29	90	dr	4.79	6.0257	7.5859	4.2659	4.7864	3.802	5.3704	4.7864	6.7609	3.802	4.7864
Sub5	2015-01-01	47	3	0.29	90	dr	2.74	3.802	4.7864	3.802	4.2659	2.6916	3.02	2.6916	3.02	2.3989	2.6916
Sub5	2015-01-01	47	3	0.29	90	dr	3.02	3.802	4.7864	2.138	2.6916	1.9055	3.3885	3.02	3.3885	3.02	3.802
Sub5	2015-01-02	47	3	0.29	90	dr	2.18	3.802	4.7864	3.02	3.3885	3.02	3.3885	1.6983	1.9055	1.6983	1.9055
Sub5	2015-01-02	47	3	0.29	90	dr	2.59	6.0257	7.5859	2.3989	2.6916	2.138	2.6916	2.138	2.6916	2.3989	3.802
Sub5	2015-01-02	47	3	0.29	90	dr	3.32	3.02	3.802	3.02	3.3885	3.02	3.802	3.02	3.802	3.02	3.3885
Sub5	2015-01-02	47	3	0.29	90	dr	2.96	3.02	3.802	2.3989	3.3885	3.02	3.3885	2.3989	3.802	2.138	3.3885
Sub5	2015-01-02	47	3	0.29	90	dr	3.14	3.802	4.7864	3.802	4.2659	3.802	4.2659	3.02	3.3885	2.138	2.6916
Sub5	2015-01-02	47	3	0.29	90	dr	2.18	2.3989	3.802	2.6916	3.02	1.5136	2.138	1.9055	3.3885	2.138	2.3989
Sub5	2015-01-02	47	3	0.29	90	dr	2.26	4.7864	6.0257	4.7864	6.0257	1.9055	2.6916	2.3989	2.6916	1.9055	2.138
Sub5	2015-01-02	47	3	0.29	90	dr	3.26	3.02	3.802	3.02	3.3885	3.02	3.3885	3.02	3.3885	3.02	3.802
Sub5	2015-01-02	47	3	0.29	90	dr	2.64	3.802	4.7864	3.3885	3.802	3.3885	3.802	2.138	2.3989	2.138	2.3989
Sub5	2015-01-02	47	3	0.29	90	dr	4.03	4.7864	6.0257	3.3885	3.802	3.3885	4.2659	3.802	4.2659	3.802	4.7864
Sub5	2015-01-02	47	3	0.29	90	dr	2.4	3.802	4.7864	3.02	3.3885	2.138	2.3989	2.138	2.6916	2.138	3.02
Sub5	2015-01-02	47	3	0.29	90	dr	2.59	6.0257	7.5859	3.3885	3.802	1.6983	3.02	2.138	3.02	2.6916	3.3885
Sub5	2015-01-02	47	3	0.29	90	dr	2.26	1.9055	2.3989	1.9055	2.3989	1.6983	2.3989	2.138	3.02	2.138	2.3989
Sub5	2015-01-02	47	3	0.29	90	dr	2.59	3.802	4.7864	3.3885	3.802	3.02	3.3885	1.6983	2.6916	2.3989	2.6916
Sub5	2015-01-02	47	3	0.29	90	dr	2.31	3.802	4.7864	3.02	3.802	3.02	3.3885	1.6983	2.3989	1.6983	2.138
Sub5	2015-01-03	47	3	0.29	90	dr	2.54	2.3989	3.02	2.3989	3.3885	3.02	3.3885	2.3989	2.6916	1.9055	2.138
Sub5	2015-01-03	47	3	0.29	90	dr	4.27	6.0257	7.5859	6.0257	6.7609	6.0257	6.7609	3.802	4.7864	2.6916	3.02
Sub5	2015-01-03	47	3	0.29	90	dr	2.06	2.3989	3.02	2.3989	2.6916	2.138	2.3989	1.9055	2.3989	1.6983	1.9055
Sub5	2015-01-03	47	3	0.29	90	dr	2.26	3.802	4.7864	3.3885	3.802	2.6916	3.3885	1.6983	2.138	1.9055	2.138
Sub5	2015-01-03	47	3	0.29	90	dr	3.8	9.5501	7.5859	9.5501	3.802	4.2659	3.802	4.2659	3.3885	4.2659	3.02
Sub5	2015-01-03	47	3	0.29	90	dr	3.59	6.0257	7.5859	3.802	4.2659	3.02	3.802	3.3885	4.2659	3.3885	3.802
Sub5	2015-01-03	47	3	0.29	90	dr	2.64	3.802	6.0257	4.2659	5.3704	2.138	2.6916	2.3989	3.02	2.6916	3.02
Sub5	2015-01-03	47	3	0.29	90	dr	2.59	3.02	3.802	3.02	3.802	2.6916	3.3885	2.138	2.3989	2.138	3.02
Sub5	2015-01-03	47	3	0.29	90	dr	3.32	3.802	4.7864	3.02	3.3885	3.02	3.3885	2.3989	4.2659	3.3885	3.802
Sub5	2015-01-03	47	3	0.29	90	dr	4.11	3.02	7.5859	4.2659	5.3704	4.7864	5.3704	3.802	4.2659	3.02	3.802
Sub5	2015-01-03	47	3	0.29	90	dr	4.11	2.3989	3.02	2.138	4.2659	3.802	4.2659	3.802	4.2659	3.802	4.7864
Sub5	2015-01-03	47	3	0.29	90	dr	2.85	2.3989	3.02	2.3989	2.6916	2.3989	2.6916	2.3989	3.3885	3.02	3.3885
Sub5	2015-01-03	47	3	0.29	90	dr	3.45	4.7864	6.0257	3.3885	4.2659	3.802	4.2659	3.3885	3.802	2.6916	3.02
Sub5	2015-01-03	47	3	0.29	90	dr	3.52	6.0257	7.5859	3.02	4.7864	3.3885	4.2659	3.802	4.2659	2.3989	3.3885
Sub5	2015-01-04	47	3	0.29	90	dr	2.18	1.9055	3.02	1.6983	2.138	1.9055	2.6916	2.138	2.3989	1.9055	2.138
Sub5	2015-01-04	47	3	0.29	90	dr	2.69	3.02	3.802	2.6916	3.02	2.3989	3.802	3.02	3.3885	1.9055	2.138
Sub5	2015-01-04	47	3	0.29	90	dr	3.8	3.02	3.802	2.6916	3.802	3.3885	4.2659	3.802	4.2659	3.3885	3.802
Sub5	2015-01-04	47	3	0.29	90	dr	2.85	3.02	6.0257	2.3989	2.6916	2.3989	3.02	2.6916	3.02	2.6916	3.3885
Sub5	2015-01-04	47	3	0.29	90	dr	3.59	3.802	4.7864	3.3885	4.2659	3.802	4.2659	3.802	4.2659	2.6916	3.02
Sub5	2015-01-04	47	3	0.29	90	dr	2.06	1.9055	2.3989	1.6983	2.6916	2.138	2.6916	1.6983	2.6916	1.5136	1.9055
Sub5	2015-01-04	47	3	0.29	90	dr	2.96	3.802	4.7864	3.802	4.2659	3.802	4.2659	2.138	2.6916	2.3989	3.02
Sub5	2015-01-04	47	3	0.29	90	dr	3.14	3.802	4.7864	3.02	3.3885	3.02	3.3885	3.02	3.3885	2.6916	3.3885
Sub5	2015-01-04	47	3	0.29	90	dr	2.91	6.0257	7.5859	5.3704	6.7609	2.6916	3.3885	2.6916	3.02	2.6916	3.02
Sub5	2015-01-04	47	3	0.29	90	dr	2.91	9.5501	1.9055	2.6916	2.3989	3.3885	2.3989	3.02	2.3989	3.802	2.6916
Sub5	2015-01-04	47	3	0.29	90	dr	2.74	3.02	3.802	2.138	2.3989	2.138	3.02	2.6916	3.02	2.6916	3.02
Sub5	2015-01-04	47	3	0.29	90	dr	2.59	2.3989	3.02	1.9055	2.138	1.9055	2.138	1.9055	3.3885	3.02	3.802
Sub5	2015-01-04	47	3	0.29	90	dr	3.14	3.802	7.5859	4.7864	5.3704	3.02	3.3885	3.02	3.3885	2.6916	3.3885
Sub5	2015-01-04	47	3	0.29	90	dr	4.35	2.3989	6.0257	4.2659	5.3704	4.7864	5.3704	3.802	4.2659	3.802	4.2659
Sub5	2015-01-05	47	3	0.29	90	dr	2.4	4.7864	6.0257	2.3989	3.02	2.3989	3.02	2.138	2.3989	2.138	2.3989
Sub5	2015-01-05	47	3	0.29	90	dr	4.18	3.802	4.7864	3.802	4.2659	3.3885	4.2659	3.802	5.3704	3.802	4.7864
Sub5	2015-01-05	47	3	0.29	90	dr	3.88	6.0257	12.0228	6.7609	7.5859	5.3704	6.7609	3.02	3.802	2.6916	3.02
Sub5	2015-01-05	47	3	0.29	90	dr	4.11	4.7864	6.0257	4.2659	4.7864	4.2659	4.7864	3.3885	4.2659	3.802	4.2659
Sub5	2015-01-05	47	3	0.29	90	dr	4.11	12.0228	4.7864	6.0257	3.802	4.2659	3.802	4.2659	3.802	5.3704	3.3885
Sub5	2015-01-05	47	3	0.29	90	dr	3.66	2.3989	3.802	3.02	3.802	3.3885	4.7864	3.02	3.802	3.3885	3.802
Sub5	2015-01-05	47	3	0.29	90	dr	3.8	6.0257	7.5859	4.2659	4.7864	3.802	4.2659	3.802	4.7864	3.02	3.3885
Sub5	2015-01-05	47	3	0.29	90	ul	3.59	3.02	3.802	3.02	3.3885	2.6916	3.3885	3.02	4.7864	3.802	4.2659
Sub5	2015-01-05	47	3	0.29	90	ul	4.52	6.0257	7.5859	4.7864	5.3704	4.2659	4.7864	4.2659	4.7864	4.2659	4.7864
Sub5	2015-01-05	47	3	0.29	90	ul	2.96	6.0257	9.5501	3.3885	3.802	2.6916	3.3885	2.6916	3.02	2.6916	3.3885
Sub5	2015-01-05	47	3	0.29	90	ul	4.35	6.0257	7.5859	4.7864	6.0257	4.7864	5.3704	4.2659	4.7864	3.3885	3.802
Sub5	2015-01-05	47	3	0.29	90	ul	4.11	3.02	3.802	3.02	3.802	3.02	3.802	3.3885	4.7864	4.2659	6.0257
Sub6	2015-01-06	47	3	0.29	90	ul	3.88	8.5115	4.2659	6.0257	4.7864	5.3704	3.802	4.2659	3.802	4.2659	2.3989
Sub6	2015-01-06	47	3	0.29	90	ul	2.74	3.3885	4.2659	3.02	4.7864	3.3885	3.802	2.3989	2.6916	2.138	2.3989
Sub6	2015-01-06	47	3	0.29	90	ul	3.95	4.2659	5.3704	3.3885	4.2659	3.02	4.2659	3.802	4.7864	3.802	4.2659
Sub6	2015-01-06	47	3	0.29	90	ul	2.54	1.349	2.6916	1.9055	2.138	1.6983	2.6916	2.3989	3.3885	2.3989	3.02
Sub6	2015-01-06	47	3	0.29	90	ul	3.26	2.138	3.3885	2.6916	3.3885	3.02	3.3885	3.02	3.3885	2.6916	4.2659
Sub6	2015-01-06	47	3	0.29	90	dr	4.18	4.2659	5.3704	3.802	4.2659	3.802	4.7864	3.802	4.7864	3.802	4.2659
Sub6	2015-01-06	47	3	0.29	90	dr	3.8	3.3885	4.2659	2.6916	3.3885	3.02	4.2659	3.3885	3.802	3.3885	5.3704
Sub6	2015-01-06	47	3	0.29	90	dr	3.88	5.3704	6.7609	3.3885	3.802	3.3885	4.2659	3.3885	4.2659	3.802	4.2659
Sub6	2015-01-06	47	3	0.29	90	dr	1.87	3.3885	4.2659	2.3989	2.6916	1.6983	1.9055	1.6983	1.9055	1.6983	2.3989
Sub6	2015-01-06	47	3	0.29	90	dr	4.52	2.6916	4.2659	3.02	5.3704	4.2659	5.3704	4.2659	5.3704	3.802	4.2659
Sub6	2015-01-07	47	3	0.29	90	ul	1.83	2.138	2.6916	1.9055	2.138	1.9055	2.138	1.349	2.138	1.6983	1.9055
Sub6	2015-01-07	47	3	0.29	90	ul	2.4	2.138	2.6916	2.138	2.3989	2.138	2.3989	2.138	2.6916	2.138	3.02
Sub6	2015-01-07	47	3	0.29	90	ul	2.14	4.2659	5.3704	2.3989	2.6916	2.138	2.3989	2.138	2.3989	1.6983	2.138
Sub6	2015-01-07	47	3	0.29	90	ul	3.45	4.2659	5.3704	3.802	4.7864	3.802	4.2659	3.02	3.3885	3.02	3.3885
Sub6	2015-01-07	47	3	0.29	90	ul	15.14	8.5115	6.7609	16.9827	15.1358	19.0549	16.9827	19.0549	12.0228	13.4898	12.0228
Sub6	2015-01-07	47	3	0.29	90	ul	1.83	2.138	2.6916	1.9055	2.138	1.6983	2.138	1.5136	1.6983	1.5136	2.6916
Sub6	2015-01-07	47	3	0.29	90	ul	2.22	2.6916	3.3885	2.138	2.6916	2.138	2.3989	2.138	2.3989	1.9055	2.3989
Sub6	2015-01-07	47	3	0.29	90	ul	2.96	3.3885	5.3704	3.802	4.2659	3.3885	3.802	2.6916	4.7864	1.9055	2.138
Sub6	2015-01-07	47	3	0.29	90	ul	2.35	6.7609	4.2659	5.3704	3.02	3.3885	1.6983	2.6916	2.3989	2.6916	1.6983
Sub6	2015-01-07	47	3	0.29	90	ul	1.83	2.6916	3.3885	1.6983	2.3989	1.6983	1.9055	1.6983	1.9055	1.6983	2.138
Sub6	2015-01-07	47	3	0.29	90	ul	2.74	2.6916	4.2659	3.3885	3.802	2.6916	3.3885	2.3989	2.6916	2.3989	3.02
Sub6	2015-01-07	47	3	0.29	90	ul	1.94	4.2659	5.3704	1.9055	2.138	1.6983	1.9055	1.349	2.138	1.6983	3.3885
Sub6	2015-01-07	47	3	0.29	90	ul	2.31	1.349	2.138	1.349	2.138	1.5136	2.6916	2.3989	2.6916	2.138	2.6916
Sub6	2015-01-07	47	3	0.29	90	ul	1.94	2.138	2.6916	1.6983	2.138	1.6983	2.138	1.6983	1.9055	1.5136	3.02
Sub6	2015-01-07	47	3	0.29	90	ul	2.59	1.6983	2.138	1.5136	1.9055	1.5136	2.3989	1.6983	3.3885	3.02	4.7864
Sub6	2015-01-08	47	3	0.29	90	ul	4.18	4.2659	5.3704	3.3885	4.2659	3.802	4.2659	3.802	4.2659	3.802	5.3704
Sub6	2015-01-08	47	3	0.29	90	ul	3.2	3.3885	5.3704	3.02	3.3885	3.02	3.3885	2.6916	3.3885	3.02	3.802
Sub6	2015-01-08	47	3	0.29	90	ul	4.11	3.3885	4.2659	3.3885	5.3704	3.802	4.2659	3.802	4.7864	3.802	4.2659
Sub6	2015-01-08	47	3	0.29	90	ul	3.08	3.3885	5.3704	4.2659	4.7864	3.3885	4.2659	3.02	3.3885	2.138	2.6916
Sub6	2015-01-08	47	3	0.29	90	ul	2.96	3.3885	4.2659	3.02	4.2659	3.02	3.802	2.6916	3.02	2.3989	3.02
Sub6	2015-01-08	47	3	0.29	90	ul	3.2	3.3885	4.2659	2.6916	3.02	2.3989	2.6916	2.3989	4.7864	3.3885	4.2659
Sub6	2015-01-08	47	3	0.29	90	ul	3.73	2.6916	5.3704	1.6983	3.3885	3.02	5.3704	3.802	4.2659	3.02	3.3885
Sub6	2015-01-08	47	3	0.29	90	ul	2.64	2.6916	3.3885	2.138	2.6916	2.3989	2.6916	2.3989	2.6916	2.3989	3.3885
Sub6	2015-01-08	47	3	0.29	90	ul	2.54	2.6916	3.3885	1.6983	2.3989	2.138	2.3989	2.138	3.02	2.6916	3.02
Sub6	2015-01-08	47	3	0.29	90	ul	2.14	3.3885	4.2659	3.02	3.802	3.3885	3.802	1.349	1.6983	1.5136	2.138
Sub6	2015-01-08	47	3	0.29	90	ul	3.32	3.3885	4.2659	3.3885	4.2659	3.3885	3.802	3.02	3.802	2.3989	3.802
Sub6	2015-01-08	47	3	0.29	90	ul	2.18	3.3885	4.2659	3.3885	4.7864	2.138	2.3989	2.138	2.3989	1.9055	2.138
Sub6	2015-01-08	47	3	0.29	90	ul	1.91	8.5115	2.6916	3.3885	1.9055	2.138	1.0715	1.5136	1.349	3.3885	3.02
Sub6	2015-01-08	47	3	0.29	90	ul	2.91	4.2659	5.3704	3.3885	4.2659	3.802	4.7864	1.9055	2.6916	2.3989	2.6916
Sub6	2015-01-09	47	3	0.29	90	ul	4.11	3.3885	4.2659	3.02	3.802	3.3885	3.802	3.3885	5.3704	4.2659	4.7864
Sub6	2015-01-09	47	3	0.29	90	ul	2.18	6.7609	1.6983	2.138	1.9055	2.138	1.9055	2.3989	2.138	2.6916	1.9055
Sub6	2015-01-09	47	3	0.29	90	ul	3.14	2.6916	4.2659	2.6916	3.02	2.6916	3.3885	3.02	3.3885	3.02	3.3885
Sub6	2015-01-09	47	3	0.29	90	ul	2.85	2.6916	3.3885	2.6916	3.3885	2.3989	3.02	2.6916	3.02	2.6916	3.3885
Sub6	2015-01-09	47	3	0.29	90	ul	4.61	4.2659	5.3704	3.802	4.2659	3.802	4.2659	3.802	5.3704	4.7864	6.0257
Sub6	2015-01-09	47	3	0.29	90	ul	2.06	8.5115	3.3885	4.2659	2.138	2.6916	2.138	2.3989	1.6983	2.138	1.5136
Sub6	2015-01-09	47	3	0.29	90	ul	4.03	8.5115	6.7609	8.5115	5.3704	6.0257	3.802	4.2659	3.3885	3.802	3.3885
Sub6	2015-01-09	47	3	0.29	90	ul	2.35	2.138	5.3704	2.6916	3.02	1.9055	2.6916	2.3989	2.6916	2.138	2.3989
Sub6	2015-01-09	47	3	0.29	90	ul	2.26	1.6983	2.6916	1.9055	2.6916	1.9055	2.3989	2.138	2.3989	2.138	2.6916
Sub6	2015-01-09	47	3	0.29	90	ul	1.91	8.5115	1.349	1.6983	1.5136	1.6983	1.5136	1.9055	1.6983	2.6916	2.138
Sub6	2015-01-09	47	3	0.29	90	ul	2.74	4.2659	5.3704	3.02	3.802	3.02	3.802	1.9055	2.6916	2.138	3.3885
Sub6	2015-01-09	47	3	0.29	90	ul	1.87	1.6983	2.138	1.6983	1.9055	1.6983	2.138	1.6983	2.138	1.6983	1.9055
Sub6	2015-01-09	47	3	0.29	90	ul	4.18	2.6916	5.3704	3.3885	4.2659	3.802	5.3704	3.02	4.2659	3.3885	6.0257
Sub6	2015-01-09	47	3	0.29	90	ul	2.31	2.138	2.6916	2.138	2.3989	2.138	2.6916	2.138	2.3989	2.138	2.3989
Sub6	2015-01-10	47	3	0.29	90	ul	2.59	1.0715	1.349	0.8512	1.349	1.0715	2.138	1.9055	4.2659	3.802	4.2659
Sub6	2015-01-10	47	3	0.29	90	ul	1.83	2.138	4.2659	2.138	2.3989	1.6983	2.138	1.6983	1.9055	1.349	2.3989
Sub6	2015-01-10	47	3	0.29	90	ul	1.57	4.2659	8.5115	3.3885	3.802	1.349	2.3989	1.349	1.5136	1.349	1.6983
Sub6	2015-01-10	47	3	0.29	90	ul	1.43	6.7609	1.6983	2.138	1.349	1.6983	1.5136	1.6983	1.2023	1.349	1.2023
Sub6	2015-01-10	47	3	0.29	90	ul	1.48	2.138	2.6916	1.349	1.5136	0.955	1.349	1.0715	2.3989	1.6983	1.9055
Sub6	2015-01-10	47	3	0.29	90	ul	1.67	1.6983	2.138	1.349	1.5136	1.2023	1.9055	1.6983	1.9055	1.5136	1.9055
Sub6	2015-01-10	47	3	0.29	90	ul	2.02	4.2659	6.7609	3.3885	3.802	1.2023	1.9055	1.6983	2.6916	2.3989	2.6916
Sub6	2015-01-10	47	3	0.29	90	ul	2.4	0.8512	1.6983	1.2023	2.138	1.9055	2.138	1.9055	3.02	2.6916	3.02
Sub6	2015-01-10	47	3	0.29	90	ul	1.11	1.0715	1.349	1.0715	1.2023	0.955	1.5136	0.955	1.0715	0.8512	1.5136
Sub6	2015-01-10	47	3	0.29	90	ul	1.94	2.138	2.6916	1.5136	1.9055	1.6983	2.138	1.9055	2.3989	1.5136	2.138
Sub6	2015-01-10	47	3	0.29	90	ul	1.94	1.0715	2.6916	2.138	2.3989	2.138	2.3989	1.9055	2.138	1.5136	1.6983
Sub6	2015-01-10	47	3	0.29	90	ul	1.09	0.8512	3.3885	1.2023	1.6983	1.5136	2.138	0.7586	0.955	0.7586	0.955
Sub6	2015-01-10	47	3	0.29	90	ul	1.8	2.6916	3.3885	1.5136	2.138	1.6983	1.9055	1.6983	1.9055	1.6983	1.9055
Sub6	2015-01-10	47	3	0.29	90	ul	2.1	2.6916	3.3885	2.138	2.3989	2.138	2.3989	2.138	2.3989	1.6983	1.9055
Sub6	2015-01-11	47	3	0.29	90	ul	2.22	4.2659	5.3704	1.6983	2.3989	2.138	2.3989	1.9055	2.6916	1.9055	2.3989
Sub6	2015-01-11	47	3	0.29	90	ul	1.25	0.6761	1.349	1.0715	1.2023	1.0715	1.349	1.2023	1.349	1.2023	1.349
Sub6	2015-01-11	47	3	0.29	90	ul	2.22	1.0715	3.3885	1.6983	2.138	1.9055	3.02	1.5136	2.3989	2.138	2.6916
Sub6	2015-01-11	47	3	0.29	90	ul	1.76	1.6983	3.3885	1.6983	1.9055	1.6983	2.138	1.9055	2.138	1.349	1.5136
Sub6	2015-01-11	47	3	0.29	90	ul	1.54	4.2659	5.3704	1.6983	1.9055	1.0715	1.6983	1.5136	1.9055	1.5136	1.6983
Sub6	2015-01-11	47	3	0.29	90	ul	1.7	1.349	2.6916	2.138	2.3989	1.5136	1.6983	1.5136	1.9055	1.6983	1.9055
Sub6	2015-01-11	47	3	0.29	90	ul	2.54	4.2659	5.3704	3.802	4.7864	3.802	4.2659	2.3989	2.6916	1.5136	1.6983
Sub6	2015-01-11	47	3	0.29	90	ul	3.08	4.2659	5.3704	4.2659	4.7864	2.6916	3.3885	2.6916	3.3885	3.02	3.3885
Sub6	2015-01-11	47	3	0.29	90	ul	0.96	0.8512	1.0715	0.8512	0.955	0.7586	0.955	0.8512	0.955	0.7586	1.6983
Sub6	2015-01-11	47	3	0.29	90	ul	1.2	0.8512	1.0715	0.7586	0.955	0.8512	1.349	1.2023	1.349	1.2023	1.349
Sub6	2015-01-11	47	3	0.29	90	ul	1.7	2.138	2.6916	2.138	2.3989	2.138	2.6916	1.9055	2.138	0.955	1.0715
Sub6	2015-01-11	47	3	0.29	90	ul	1.43	6.7609	1.0715	1.349	1.2023	1.349	1.2023	1.6983	1.2023	1.6983	1.5136
Sub6	2015-01-12	47	3	0.29	90	ul	1.94	2.138	2.6916	2.138	2.3989	1.9055	2.138	1.6983	1.9055	1.6983	2.3989
Sub6	2015-01-12	47	3	0.29	90	ul	3.26	8.5115	0.8512	1.0715	0.955	3.802	3.02	3.802	3.3885	3.802	2.138
Sub6	2015-01-12	47	3	0.29	90	ul	1.98	1.349	1.6983	0.955	1.349	1.2023	1.6983	1.5136	2.6916	2.138	3.3885
Sub6	2015-01-12	47	3	0.29	90	ul	2.22	5.3704	6.7609	1.9055	2.138	1.9055	2.138	1.9055	2.6916	2.138	2.6916
Sub6	2015-01-12	47	3	0.29	90	ul	2.1	1.0715	3.3885	2.3989	2.6916	2.138	2.3989	1.9055	2.138	1.6983	2.3989
Sub6	2015-01-12	47	3	0.29	90	dr	2.64	3.3885	4.2659	3.3885	4.2659	3.3885	3.802	2.6916	3.02	1.5136	2.138
Sub6	2015-01-12	47	3	0.29	90	dr	1.09	1.0715	1.349	1.0715	1.2023	0.955	1.2023	1.0715	1.2023	0.955	1.2023
Sub6	2015-01-12	47	3	0.29	90	dr	2.54	1.6983	2.138	1.6983	3.02	2.3989	2.6916	2.138	3.02	2.3989	2.6916
Sub6	2015-01-12	47	3	0.29	90	dr	2.22	4.2659	6.7609	5.3704	6.0257	1.5136	2.3989	2.138	2.6916	2.138	2.6916
Sub6	2015-01-12	47	3	0.29	90	dr	2.96	1.349	3.3885	2.6916	3.02	2.6916	3.02	2.6916	3.3885	2.6916	3.3885
Sub7	2015-09-07	47	3	0.29	90	ul	9.02	5.3704	8.5115	3.3885	6.0257	4.7864	9.5501	8.5115	10.7154	9.5501	13.4898
Sub7	2015-09-07	47	3	0.29	90	ul	6.38	6.7609	10.7154	7.5859	10.7154	6.0257	6.7609	6.0257	6.7609	6.0257	6.7609
Sub7	2015-09-07	47	3	0.29	90	ul	10.31	16.9827	8.5115	12.0228	9.5501	10.7154	6.7609	13.4898	10.7154	12.0228	9.5501
Sub7	2015-09-07	47	3	0.29	90	ul	6.14	4.2659	5.3704	4.2659	6.0257	5.3704	6.7609	5.3704	8.5115	5.3704	6.0257
Sub7	2015-09-07	47	3	0.29	90	ul	11.13	8.5115	10.7154	8.5115	9.5501	8.5115	12.0228	10.7154	12.0228	10.7154	13.4898
Sub7	2015-09-07	47	3	0.29	90	ul	9.02	8.5115	10.7154	8.5115	9.5501	7.5859	9.5501	8.5115	10.7154	8.5115	9.5501
Sub7	2015-09-07	47	3	0.29	90	dr	8.68	8.5115	10.7154	8.5115	9.5501	8.5115	9.5501	6.0257	9.5501	7.5859	12.0228
Sub7	2015-09-07	47	3	0.29	90	dr	6.51	16.9827	2.6916	4.2659	3.802	6.7609	6.0257	6.7609	6.0257	7.5859	6.0257
Sub7	2015-09-07	47	3	0.29	90	dr	8.51	6.7609	10.7154	8.5115	10.7154	7.5859	9.5501	8.5115	9.5501	6.7609	9.5501
Sub7	2015-09-07	47	3	0.29	90	dr	9.02	6.7609	10.7154	7.5859	8.5115	7.5859	9.5501	8.5115	10.7154	8.5115	9.5501
Sub7	2015-09-07	47	3	0.29	90	dr	8.35	6.7609	10.7154	8.5115	9.5501	7.5859	9.5501	8.5115	10.7154	6.7609	7.5859
Sub7	2015-09-09	47	3	0.29	90	ul	5.8	8.5115	10.7154	7.5859	8.5115	6.0257	6.7609	5.3704	6.0257	4.7864	6.0257
Sub7	2015-09-09	47	3	0.29	90	ul	4.79	6.7609	8.5115	6.7609	7.5859	4.7864	6.0257	4.2659	4.7864	4.2659	4.7864
Sub7	2015-09-09	47	3	0.29	90	ul	5.17	5.3704	6.7609	4.7864	5.3704	4.7864	5.3704	4.7864	5.3704	4.7864	6.0257
Sub7	2015-09-09	47	3	0.29	90	ul	5.69	13.4898	10.7154	13.4898	8.5115	9.5501	5.3704	6.7609	4.2659	5.3704	4.2659
Sub7	2015-09-09	47	3	0.29	90	ul	4.7	2.6916	5.3704	4.2659	4.7864	4.2659	4.7864	4.2659	4.7864	4.2659	6.0257
Sub7	2015-09-09	47	3	0.29	90	ul	6.38	4.2659	8.5115	6.7609	8.5115	7.5859	8.5115	6.0257	6.7609	4.7864	5.3704
Sub7	2015-09-09	47	3	0.29	90	ul	3.08	13.4898	5.3704	6.7609	6.0257	6.7609	2.6916	3.02	1.9055	3.02	2.6916
Sub7	2015-09-09	47	3	0.29	90	ul	4.97	5.3704	6.7609	4.7864	5.3704	4.7864	6.0257	4.7864	5.3704	4.2659	4.7864
Sub7	2015-09-09	47	3	0.29	90	ul	4.52	5.3704	8.5115	6.7609	7.5859	5.3704	6.0257	3.802	4.2659	3.02	5.3704
Sub7	2015-09-09	47	3	0.29	90	ul	8.84	5.3704	8.5115	5.3704	6.7609	6.0257	9.5501	8.5115	9.5501	8.5115	12.0228
Sub7	2015-09-09	47	3	0.29	90	ul	4.18	3.3885	4.2659	3.3885	4.2659	3.802	4.7864	4.2659	4.7864	3.3885	4.2659
Sub7	2015-09-09	47	3	0.29	90	ul	7.16	13.4898	10.7154	13.4898	7.5859	9.5501	8.5115	9.5501	5.3704	6.0257	5.3704
Sub7	2015-09-12	47	3	0.29	90	ul	5.69	6.7609	8.5115	6.7609	7.5859	6.0257	6.7609	5.3704	6.0257	4.7864	5.3704
Sub7	2015-09-12	47	3	0.29	90	ul	3.88	5.3704	6.7609	4.7864	5.3704	3.802	4.2659	3.802	4.2659	3.3885	3.802
Sub7	2015-09-12	47	3	0.29	90	ul	7.59	8.5115	10.7154	6.7609	7.5859	6.7609	7.5859	6.7609	8.5115	7.5859	8.5115
Sub7	2015-09-12	47	3	0.29	90	ul	3.73	8.5115	10.7154	7.5859	8.5115	4.2659	4.7864	3.3885	3.802	3.02	3.3885
Sub7	2015-09-12	47	3	0.29	90	ul	3.52	2.6916	4.2659	3.3885	4.2659	3.02	4.2659	3.802	4.2659	2.6916	3.3885
Sub7	2015-09-12	47	3	0.29	90	ul	5.58	3.3885	6.7609	4.2659	4.7864	4.2659	6.0257	4.2659	6.7609	5.3704	7.5859
Sub7	2015-09-12	47	3	0.29	90	ul	6.76	6.7609	8.5115	6.0257	7.5859	6.0257	6.7609	6.0257	7.5859	6.7609	7.5859
Sub7	2015-09-12	47	3	0.29	90	ul	4.35	2.138	5.3704	4.2659	4.7864	4.2659	4.7864	4.2659	4.7864	3.802	4.2659
Sub7	2015-09-12	47	3	0.29	90	ul	2.45	4.2659	5.3704	3.3885	4.7864	2.138	2.6916	2.138	2.3989	2.138	3.3885
Sub7	2015-09-12	47	3	0.29	90	ul	6.26	8.5115	10.7154	6.7609	7.5859	6.7609	8.5115	4.7864	7.5859	4.7864	6.0257
Sub7	2015-09-12	47	3	0.29	90	ul	5.27	8.5115	10.7154	7.5859	9.5501	6.0257	12.0228	6.0257	6.7609	2.3989	3.02
Sub7	2015-09-12	47	3	0.29	90	ul	3.95	8.5115	10.7154	7.5859	8.5115	4.2659	4.7864	3.3885	3.802	3.3885	4.2659
Sub7	2015-09-12	47	3	0.29	90	ul	5.69	4.2659	8.5115	4.7864	5.3704	4.7864	7.5859	5.3704	6.0257	4.2659	6.7609
Sub7	2015-09-12	47	3	0.29	90	ul	7.16	13.4898	10.7154	15.1358	4.2659	6.7609	6.0257	8.5115	6.7609	8.5115	6.7609
Sub7	2015-09-14	47	3	0.29	90	ul	8.19	8.5115	13.4898	7.5859	8.5115	7.5859	9.5501	7.5859	8.5115	7.5859	8.5115
Sub7	2015-09-14	47	3	0.29	90	ul	6.51	6.7609	8.5115	6.7609	7.5859	6.7609	8.5115	6.7609	7.5859	4.2659	6.0257
Sub7	2015-09-14	47	3	0.29	90	ul	6.63	6.7609	8.5115	6.7609	7.5859	6.7609	7.5859	6.7609	7.5859	4.7864	6.7609
Sub7	2015-09-14	47	3	0.29	90	ul	9.02	13.4898	10.7154	13.4898	9.5501	10.7154	9.5501	10.7154	8.5115	9.5501	6.0257
Sub7	2015-09-14	47	3	0.29	90	ul	4.97	8.5115	10.7154	6.0257	8.5115	6.0257	6.7609	4.2659	5.3704	3.802	4.2659
Sub7	2015-09-14	47	3	0.29	90	ul	5.8	5.3704	13.4898	6.0257	6.7609	3.802	6.7609	5.3704	6.0257	4.7864	9.5501
Sub7	2015-09-14	47	3	0.29	90	ul	6.14	5.3704	6.7609	5.3704	6.0257	4.7864	6.7609	6.0257	6.7609	6.0257	6.7609
Sub7	2015-09-14	47	3	0.29	90	ul	6.14	13.4898	6.7609	9.5501	7.5859	9.5501	5.3704	6.0257	4.2659	6.7609	6.0257
Sub7	2015-09-14	47	3	0.29	90	ul	5.27	5.3704	6.7609	4.7864	5.3704	4.7864	5.3704	4.2659	5.3704	4.7864	7.5859
Sub7	2015-09-14	47	3	0.29	90	ul	8.68	16.9827	8.5115	10.7154	6.0257	8.5115	7.5859	8.5115	7.5859	15.1358	6.7609
Sub7	2015-09-14	47	3	0.29	90	ul	5.17	3.3885	5.3704	3.802	5.3704	4.7864	6.7609	5.3704	6.7609	3.802	4.2659
Sub7	2015-09-14	47	3	0.29	90	ul	6.26	6.7609	8.5115	6.7609	7.5859	5.3704	6.7609	6.0257	6.7609	6.0257	6.7609
Sub7	2015-09-14	47	3	0.29	90	ul	4.97	8.5115	10.7154	4.7864	5.3704	4.2659	5.3704	4.7864	6.7609	4.2659	4.7864
Sub7	2015-09-14	47	3	0.29	90	ul	9.19	21.38	13.4898	21.38	13.4898	15.1358	7.5859	9.5501	7.5859	9.5501	7.5859
Sub7	2015-09-15	47	3	0.29	90	ul	5.37	8.5115	10.7154	7.5859	8.5115	7.5859	8.5115	4.2659	4.7864	3.802	4.7864
Sub7	2015-09-15	47	3	0.29	90	ul	6.03	3.3885	8.5115	4.7864	6.0257	5.3704	6.0257	5.3704	6.7609	6.0257	6.7609
Sub7	2015-09-15	47	3	0.29	90	ul	5.58	6.7609	8.5115	6.7609	7.5859	5.3704	6.0257	4.7864	5.3704	4.7864	7.5859
Sub7	2015-09-15	47	3	0.29	90	ul	4.61	8.5115	10.7154	4.7864	5.3704	4.2659	5.3704	4.2659	4.7864	4.2659	4.7864
Sub7	2015-09-15	47	3	0.29	90	ul	6.89	6.7609	10.7154	7.5859	8.5115	6.7609	7.5859	6.7609	9.5501	5.3704	6.0257
Sub7	2015-09-15	47	3	0.29	90	ul	5.8	5.3704	6.7609	4.7864	6.0257	5.3704	6.7609	6.0257	6.7609	4.7864	5.3704
Sub7	2015-09-15	47	3	0.29	90	ul	6.76	13.4898	8.5115	13.4898	7.5859	8.5115	6.7609	13.4898	3.802	6.7609	4.7864
Sub7	2015-09-15	47	3	0.29	90	ul	3.02	3.3885	4.2659	2.6916	3.02	2.6916	3.02	2.6916	3.3885	3.02	3.3885
Sub7	2015-09-15	47	3	0.29	90	ul	5.37	8.5115	10.7154	6.0257	6.7609	6.0257	6.7609	5.3704	6.7609	3.3885	4.7864
Sub7	2015-09-15	47	3	0.29	90	ul	4.97	8.5115	10.7154	5.3704	6.7609	3.802	5.3704	4.7864	5.3704	4.7864	6.0257
Sub7	2015-09-15	47	3	0.29	90	ul	3.32	5.3704	6.7609	4.2659	4.7864	3.802	4.2659	3.802	5.3704	1.6983	2.3989
Sub7	2015-09-15	47	3	0.29	90	ul	3.26	4.2659	5.3704	2.3989	3.3885	3.02	3.3885	3.02	3.802	3.02	3.3885
Sub7	2015-09-15	47	3	0.29	90	ul	2.22	1.349	2.6916	1.6983	1.9055	1.6983	2.138	1.9055	2.6916	2.3989	2.6916
Sub7	2015-09-16	47	3	0.29	90	ul	3.52	4.2659	5.3704	2.3989	2.6916	2.3989	3.3885	3.02	4.7864	3.802	4.2659
Sub7	2015-09-16	47	3	0.29	90	ul	3.8	2.6916	4.2659	3.3885	4.7864	3.802	4.2659	3.3885	3.802	3.3885	4.2659
Sub7	2015-09-16	47	3	0.29	90	ul	2.54	13.4898	2.6916	3.802	3.02	3.3885	3.02	3.3885	1.9055	2.138	1.9055
Sub7	2015-09-16	47	3	0.29	90	ul	1.98	2.138	2.6916	1.9055	2.138	1.9055	2.3989	1.6983	1.9055	1.5136	2.6916
Sub7	2015-09-16	47	3	0.29	90	ul	2.91	1.6983	2.138	1.6983	2.138	1.9055	3.3885	3.02	3.3885	2.6916	3.3885
Sub7	2015-09-16	47	3	0.29	90	ul	3.14	1.6983	4.2659	3.3885	4.7864	3.3885	4.2659	3.02	3.3885	2.138	3.02
Sub7	2015-09-16	47	3	0.29	90	ul	6.26	4.2659	6.7609	5.3704	6.0257	5.3704	6.0257	5.3704	7.5859	6.0257	7.5859
Sub7	2015-09-16	47	3	0.29	90	ul	2.35	2.6916	3.3885	2.3989	3.02	1.5136	2.6916	2.3989	2.6916	2.3989	2.6916
Sub7	2015-09-16	47	3	0.29	90	ul	5.07	6.7609	8.5115	6.0257	6.7609	5.3704	6.7609	4.2659	4.7864	4.2659	5.3704
Sub7	2015-09-16	47	3	0.29	90	ul	4.7	4.2659	6.7609	4.2659	4.7864	4.2659	4.7864	4.2659	6.0257	4.2659	4.7864
Sub7	2015-09-16	47	3	0.29	90	ul	6.76	6.7609	8.5115	4.2659	6.0257	5.3704	6.7609	6.0257	7.5859	6.7609	8.5115
Sub7	2015-09-16	47	3	0.29	90	ul	11.13	13.4898	10.7154	13.4898	9.5501	16.9827	10.7154	12.0228	9.5501	12.0228	7.5859
Sub7	2015-09-16	47	3	0.29	90	ul	7.59	4.2659	6.7609	5.3704	9.5501	6.7609	8.5115	7.5859	8.5115	6.7609	7.5859
Sub7	2015-09-17	47	3	0.29	90	ul	5.91	5.3704	6.7609	3.02	6.7609	6.0257	7.5859	5.3704	6.0257	4.7864	6.0257
Sub7	2015-09-17	47	3	0.29	90	ul	6.76	8.5115	10.7154	6.7609	7.5859	6.7609	8.5115	6.0257	6.7609	6.0257	6.7609
Sub7	2015-09-17	47	3	0.29	90	ul	5.47	5.3704	10.7154	5.3704	6.0257	5.3704	6.0257	5.3704	6.0257	4.7864	5.3704
Sub7	2015-09-17	47	3	0.29	90	ul	8.35	5.3704	8.5115	6.7609	7.5859	6.7609	9.5501	8.5115	9.5501	7.5859	8.5115
Sub7	2015-09-17	47	3	0.29	90	ul	5.37	5.3704	6.7609	4.2659	5.3704	4.7864	6.0257	5.3704	6.0257	4.7864	5.3704
Sub7	2015-09-17	47	3	0.29	90	dr	9.02	13.4898	6.7609	9.5501	8.5115	9.5501	8.5115	9.5501	8.5115	9.5501	8.5115
Sub7	2015-09-17	47	3	0.29	90	dr	6.38	5.3704	6.7609	5.3704	6.0257	5.3704	6.0257	5.3704	7.5859	6.7609	7.5859
Sub7	2015-09-17	47	3	0.29	90	dr	5.58	5.3704	8.5115	6.0257	6.7609	6.0257	6.7609	6.0257	7.5859	3.802	4.2659
Sub7	2015-09-17	47	3	0.29	90	dr	4.97	4.2659	8.5115	6.0257	6.7609	5.3704	6.0257	4.2659	4.7864	3.3885	6.7609
Sub7	2015-09-17	47	3	0.29	90	dr	5.47	8.5115	10.7154	6.0257	6.7609	4.7864	6.0257	4.7864	6.0257	4.7864	6.7609
Sub8	2015-09-15	47	3	0.29	90	ur	8.51	4.2659	10.7154	8.5115	13.4898	9.5501	10.7154	8.5115	10.7154	6.0257	6.7609
Sub8	2015-09-15	47	3	0.29	90	ur	4.35	4.2659	5.3704	3.3885	4.2659	3.802	4.7864	3.802	4.2659	3.802	6.0257
Sub8	2015-09-15	47	3	0.29	90	ur	5.69	6.7609	10.7154	6.7609	8.5115	5.3704	6.0257	4.7864	6.0257	5.3704	6.7609
Sub8	2015-09-15	47	3	0.29	90	ur	8.51	5.3704	6.7609	5.3704	7.5859	6.7609	8.5115	7.5859	10.7154	8.5115	9.5501
Sub8	2015-09-15	47	3	0.29	90	ur	6.14	6.7609	10.7154	6.7609	7.5859	6.0257	7.5859	6.0257	7.5859	4.7864	5.3704
Sub8	2015-09-15	47	3	0.29	90	dl	5.58	6.7609	8.5115	4.7864	5.3704	4.7864	5.3704	4.7864	6.7609	5.3704	6.7609
Sub8	2015-09-15	47	3	0.29	90	dl	7.88	8.5115	10.7154	7.5859	8.5115	6.7609	10.7154	7.5859	8.5115	6.7609	7.5859
Sub8	2015-09-15	47	3	0.29	90	dl	6.63	13.4898	6.7609	9.5501	6.0257	7.5859	6.0257	7.5859	5.3704	7.5859	6.0257
Sub8	2015-09-15	47	3	0.29	90	dl	8.68	4.2659	13.4898	8.5115	10.7154	9.5501	10.7154	8.5115	9.5501	6.0257	8.5115
Sub8	2015-09-15	47	3	0.29	90	dl	6.63	8.5115	13.4898	6.0257	6.7609	6.0257	7.5859	6.0257	6.7609	6.0257	7.5859
Sub8	2015-09-16	47	3	0.29	90	ur	3.95	4.7864	7.5859	5.3704	6.0257	3.02	4.7864	4.2659	4.7864	3.02	4.2659
Sub8	2015-09-16	47	3	0.29	90	ur	4.79	4.7864	7.5859	3.3885	5.3704	3.802	5.3704	4.7864	5.3704	4.2659	5.3704
Sub8	2015-09-16	47	3	0.29	90	ur	2.35	3.02	3.802	2.138	2.3989	2.138	2.3989	2.138	3.02	2.138	2.3989
Sub8	2015-09-16	47	3	0.29	90	ur	3.52	4.7864	6.0257	4.2659	5.3704	3.3885	3.802	3.3885	3.802	3.02	3.802
Sub8	2015-09-16	47	3	0.29	90	ur	3.39	9.5501	3.802	4.7864	3.3885	4.2659	2.6916	3.802	3.3885	4.2659	2.3989
Sub8	2015-09-16	47	3	0.29	90	ur	4.7	3.02	6.0257	4.7864	5.3704	4.7864	5.3704	4.2659	4.7864	4.2659	4.7864
Sub8	2015-09-16	47	3	0.29	90	ur	2.49	2.3989	3.802	2.3989	2.6916	2.3989	2.6916	2.138	2.3989	2.138	3.3885
Sub8	2015-09-16	47	3	0.29	90	ur	5.8	6.0257	7.5859	6.0257	6.7609	4.7864	6.0257	4.7864	6.7609	6.0257	6.7609
Sub8	2015-09-16	47	3	0.29	90	ur	4.27	3.802	6.0257	3.802	4.2659	3.802	4.7864	3.802	4.7864	3.802	4.7864
Sub8	2015-09-16	47	3	0.29	90	ur	6.38	6.0257	7.5859	6.0257	6.7609	6.0257	6.7609	6.0257	6.7609	5.3704	7.5859
Sub8	2015-09-16	47	3	0.29	90	ur	5.27	9.5501	4.7864	6.0257	4.7864	6.0257	5.3704	6.7609	4.2659	5.3704	4.2659
Sub8	2015-09-16	47	3	0.29	90	ur	10.12	12.0228	9.5501	12.0228	10.7154	13.4898	12.0228	13.4898	9.5501	10.7154	4.7864
Sub8	2015-09-16	47	3	0.29	90	ur	8.19	9.5501	7.5859	9.5501	7.5859	8.5115	7.5859	8.5115	7.5859	9.5501	7.5859
Sub8	2015-09-17	47	3	0.29	90	ur	7.59	4.7864	7.5859	6.0257	9.5501	8.5115	9.5501	6.7609	8.5115	6.0257	6.7609
Sub8	2015-09-17	47	3	0.29	90	ur	4.35	4.7864	6.0257	4.2659	5.3704	4.2659	4.7864	4.2659	4.7864	3.802	4.2659
Sub8	2015-09-17	47	3	0.29	90	ur	3.8	6.0257	9.5501	4.7864	5.3704	4.7864	5.3704	2.6916	3.3885	3.02	4.2659
Sub8	2015-09-17	47	3	0.29	90	ur	6.51	4.7864	7.5859	6.0257	6.7609	5.3704	6.7609	5.3704	7.5859	6.7609	7.5859
Sub8	2015-09-17	47	3	0.29	90	ur	5.07	9.5501	3.802	6.0257	4.7864	5.3704	4.7864	5.3704	4.7864	5.3704	4.7864
Sub8	2015-09-17	47	3	0.29	90	ur	3.14	3.02	3.802	3.02	3.3885	3.02	3.3885	3.02	3.802	2.3989	3.3885
Sub8	2015-09-17	47	3	0.29	90	ur	4.61	3.802	6.0257	3.802	4.7864	3.802	4.7864	4.2659	4.7864	4.2659	6.0257
Sub8	2015-09-17	47	3	0.29	90	ur	6.03	4.7864	6.0257	4.7864	5.3704	4.7864	5.3704	4.7864	9.5501	6.0257	6.7609
Sub8	2015-09-17	47	3	0.29	90	ur	2.85	2.3989	6.0257	4.2659	4.7864	2.6916	3.02	2.3989	2.6916	2.3989	4.2659
Sub8	2015-09-17	47	3	0.29	90	ur	4.11	3.802	4.7864	3.802	4.2659	3.802	4.7864	3.802	4.2659	3.02	5.3704
Sub8	2015-09-17	47	3	0.29	90	ur	6.14	4.7864	12.0228	3.3885	6.0257	5.3704	6.7609	6.0257	6.7609	5.3704	6.7609
Sub8	2015-09-17	47	3	0.29	90	ur	5.58	4.7864	6.0257	4.7864	6.0257	5.3704	6.0257	4.7864	6.0257	5.3704	6.0257
Sub8	2015-09-17	47	3	0.29	90	ur	3.88	3.802	4.7864	3.3885	3.802	3.3885	4.2659	3.802	4.2659	3.02	4.7864
Sub8	2015-09-18	47	3	0.29	90	ur	6.03	4.7864	6.0257	3.802	5.3704	4.7864	6.0257	4.7864	7.5859	6.0257	7.5859
Sub8	2015-09-18	47	3	0.29	90	ur	6.63	6.0257	7.5859	4.7864	6.0257	5.3704	6.7609	6.0257	7.5859	6.7609	7.5859
Sub8	2015-09-18	47	3	0.29	90	ur	8.04	4.7864	6.0257	3.802	10.7154	7.5859	10.7154	7.5859	8.5115	6.7609	7.5859
Sub8	2015-09-18	47	3	0.29	90	ur	5.91	6.0257	7.5859	6.0257	6.7609	6.0257	6.7609	5.3704	6.0257	5.3704	6.0257
Sub8	2015-09-18	47	3	0.29	90	ur	6.76	6.0257	9.5501	7.5859	8.5115	6.0257	6.7609	5.3704	7.5859	6.7609	8.5115
Sub8	2015-09-18	47	3	0.29	90	ur	5.07	6.0257	7.5859	6.0257	7.5859	5.3704	6.0257	4.7864	5.3704	4.2659	4.7864
Sub8	2015-09-18	47	3	0.29	90	ur	8.84	9.5501	7.5859	9.5501	8.5115	12.0228	7.5859	9.5501	7.5859	9.5501	7.5859
Sub8	2015-09-18	47	3	0.29	90	ur	3.08	3.802	6.0257	4.7864	7.5859	2.3989	3.3885	3.02	3.3885	3.02	3.3885
Sub8	2015-09-18	47	3	0.29	90	ur	7.16	9.5501	7.5859	9.5501	8.5115	9.5501	7.5859	8.5115	6.0257	6.7609	5.3704
Sub8	2015-09-18	47	3	0.29	90	ur	4.43	3.02	4.7864	3.802	4.2659	3.3885	4.7864	4.2659	4.7864	3.802	6.0257
Sub8	2015-09-18	47	3	0.29	90	ur	6.26	6.0257	7.5859	6.0257	6.7609	5.3704	6.7609	6.0257	6.7609	6.0257	6.7609
Sub8	2015-09-18	47	3	0.29	90	ur	5.07	2.3989	3.802	2.3989	4.7864	4.2659	5.3704	4.7864	5.3704	4.2659	6.7609
Sub8	2015-09-18	47	3	0.29	90	ur	6.51	3.802	6.0257	4.7864	7.5859	6.7609	8.5115	5.3704	6.0257	5.3704	7.5859
Sub8	2015-09-21	47	3	0.29	90	ur	4.79	4.7864	6.0257	3.802	4.7864	4.2659	5.3704	4.7864	5.3704	4.2659	4.7864
Sub8	2015-09-21	47	3	0.29	90	ur	3.95	3.02	4.7864	3.02	3.802	3.3885	4.2659	3.802	5.3704	3.3885	3.802
Sub8	2015-09-21	47	3	0.29	90	ur	4.27	9.5501	6.0257	7.5859	6.0257	6.7609	3.02	4.2659	3.802	4.7864	3.802
Sub8	2015-09-21	47	3	0.29	90	ur	5.17	3.02	6.0257	4.7864	5.3704	4.7864	5.3704	4.7864	6.0257	4.7864	5.3704
Sub8	2015-09-21	47	3	0.29	90	ur	2.85	3.802	4.7864	2.6916	3.3885	2.3989	2.6916	2.3989	3.3885	3.02	3.3885
Sub8	2015-09-21	47	3	0.29	90	ur	2.74	3.802	4.7864	2.6916	3.02	2.6916	3.802	2.3989	2.6916	2.3989	2.6916
Sub8	2015-09-21	47	3	0.29	90	ur	2.85	1.9055	3.802	3.02	3.3885	3.02	4.2659	2.6916	3.02	2.138	2.3989
Sub8	2015-09-21	47	3	0.29	90	ur	4.18	3.802	6.0257	4.2659	5.3704	4.7864	5.3704	3.802	4.2659	3.3885	3.802
Sub8	2015-09-21	47	3	0.29	90	ur	2.06	3.802	4.7864	3.02	3.3885	1.6983	2.138	1.6983	2.3989	1.9055	2.6916
Sub8	2015-09-21	47	3	0.29	90	ur	1.6	1.9055	2.3989	1.5136	1.6983	1.5136	1.6983	1.5136	1.6983	1.5136	1.6983
Sub8	2015-09-21	47	3	0.29	90	ur	3.8	3.802	4.7864	3.802	4.2659	3.802	4.7864	3.3885	4.2659	3.02	3.802
Sub8	2015-09-21	47	3	0.29	90	ur	3.39	3.802	4.7864	3.3885	3.802	3.02	3.3885	2.6916	3.802	3.3885	4.2659
Sub8	2015-09-21	47	3	0.29	90	ur	3.52	1.9055	3.02	2.138	2.6916	2.3989	3.3885	3.02	3.802	3.3885	6.0257
Sub8	2015-09-22	47	3	0.29	90	ur	4.27	6.0257	7.5859	3.3885	4.7864	4.2659	6.0257	3.802	4.2659	3.3885	4.2659
Sub8	2015-09-22	47	3	0.29	90	ur	3.2	3.802	4.7864	3.3885	3.802	3.02	3.3885	3.02	3.3885	2.6916	3.802
Sub8	2015-09-22	47	3	0.29	90	ur	4.03	4.7864	7.5859	4.2659	4.7864	4.2659	4.7864	3.3885	4.7864	3.02	4.2659
Sub8	2015-09-22	47	3	0.29	90	ur	3.73	6.0257	7.5859	5.3704	6.0257	3.02	4.7864	3.02	3.802	3.3885	4.7864
Sub8	2015-09-22	47	3	0.29	90	ur	3.14	4.7864	6.0257	3.802	4.2659	3.3885	3.802	2.6916	3.02	2.6916	3.3885
Sub8	2015-09-22	47	3	0.29	90	ur	2.96	1.9055	2.3989	1.9055	2.138	1.5136	3.3885	2.6916	3.802	3.3885	3.802
Sub8	2015-09-22	47	3	0.29	90	ur	3.88	2.3989	3.02	2.3989	3.802	3.02	3.3885	3.02	4.7864	3.802	6.0257
Sub8	2015-09-22	47	3	0.29	90	ur	3.14	9.5501	2.3989	3.02	2.6916	3.3885	3.02	3.3885	2.6916	3.3885	3.02
Sub8	2015-09-22	47	3	0.29	90	ur	4.27	2.3989	3.02	2.3989	4.7864	4.2659	4.7864	3.802	4.2659	3.802	4.7864
Sub8	2015-09-22	47	3	0.29	90	ur	3.02	3.02	3.802	3.02	3.3885	2.6916	3.3885	2.6916	3.3885	2.3989	3.802
Sub8	2015-09-22	47	3	0.29	90	ur	3.45	3.802	4.7864	3.802	4.2659	3.3885	3.802	3.02	3.802	3.02	3.802
Sub8	2015-09-22	47	3	0.29	90	ur	3.88	4.7864	6.0257	3.802	4.7864	4.2659	4.7864	3.02	4.2659	3.3885	3.802
Sub8	2015-09-22	47	3	0.29	90	ur	3.39	3.02	7.5859	3.3885	3.802	2.6916	3.3885	3.02	4.7864	3.02	3.802
Sub8	2015-09-23	47	3	0.29	90	ur	6.26	2.6916	5.3704	3.802	4.2659	3.3885	6.0257	4.7864	8.5115	6.7609	10.7154
Sub8	2015-09-23	47	3	0.29	90	ur	1.83	3.3885	4.2659	3.3885	4.2659	1.349	1.5136	1.349	2.3989	2.138	2.6916
Sub8	2015-09-23	47	3	0.29	90	ur	5.47	5.3704	6.7609	5.3704	6.0257	4.7864	6.0257	4.2659	6.0257	5.3704	6.7609
Sub8	2015-09-23	47	3	0.29	90	ur	4.35	5.3704	6.7609	5.3704	6.0257	4.7864	5.3704	3.3885	4.7864	3.802	4.2659
Sub8	2015-09-23	47	3	0.29	90	ur	5.37	4.2659	6.7609	5.3704	6.7609	5.3704	6.0257	4.7864	5.3704	4.7864	6.0257
Sub8	2015-09-23	47	3	0.29	90	dl	6.26	13.4898	3.3885	4.7864	4.2659	6.7609	6.0257	6.7609	6.0257	6.7609	5.3704
Sub8	2015-09-23	47	3	0.29	90	dl	3.26	5.3704	6.7609	3.3885	3.802	3.02	3.3885	3.02	3.3885	3.02	3.802
Sub8	2015-09-23	47	3	0.29	90	dl	3.08	6.7609	8.5115	5.3704	6.0257	2.6916	3.02	2.6916	3.802	3.02	3.3885
Sub8	2015-09-23	47	3	0.29	90	dl	5.69	8.5115	10.7154	5.3704	6.0257	5.3704	6.7609	5.3704	7.5859	4.2659	5.3704
Sub8	2015-09-23	47	3	0.29	90	dl	6.03	5.3704	6.7609	4.7864	5.3704	4.7864	7.5859	6.0257	6.7609	5.3704	6.0257

## Sheet: Raw_Fig5c
ID	date	contrast	spatial frequency (c/d)	standard deviation (deg)	orientation (deg)	Location	threshold	preliminary reversals				experimental reversals
Sub1	2015-11-08	47	3	0.29	90	dr	4.03	5.3704	10.7154	7.5859	8.5115	4.7864	5.3704	3.02	3.802	3.3885	4.2659
Sub1	2015-11-08	47	3	0.29	90	dr	4.03	3.3885	4.2659	3.3885	3.802	3.3885	3.802	3.3885	4.7864	4.2659	4.7864
Sub1	2015-11-08	47	3	0.29	90	dr	5.37	8.5115	10.7154	6.0257	6.7609	6.0257	6.7609	4.7864	5.3704	4.2659	5.3704
Sub1	2015-11-08	47	3	0.29	90	dr	5.69	4.2659	6.7609	4.7864	8.5115	5.3704	6.0257	5.3704	6.0257	5.3704	6.0257
Sub1	2015-11-08	47	3	0.29	90	dr	5.91	6.7609	8.5115	6.0257	8.5115	6.0257	6.7609	4.7864	6.0257	5.3704	6.7609
Sub1	2015-11-13	47	3	0.29	90	dr	6.14	6.7609	8.5115	6.7609	7.5859	6.7609	9.5501	6.0257	6.7609	4.2659	4.7864
Sub1	2015-11-13	47	3	0.29	90	dr	6.63	8.5115	10.7154	8.5115	9.5501	6.7609	7.5859	6.0257	6.7609	6.0257	6.7609
Sub1	2015-11-13	47	3	0.29	90	dr	4.97	4.2659	5.3704	3.3885	4.7864	4.2659	5.3704	4.7864	5.3704	4.7864	5.3704
Sub1	2015-11-13	47	3	0.29	90	dr	6.03	8.5115	10.7154	7.5859	8.5115	6.0257	6.7609	5.3704	6.7609	5.3704	6.0257
Sub1	2015-11-13	47	3	0.29	90	dr	4.52	6.7609	8.5115	5.3704	6.0257	5.3704	6.0257	3.802	4.2659	3.802	4.2659
Sub2	2015-11-09	47	3	0.29	90	ul	7.44	13.4898	8.5115	10.7154	4.7864	7.5859	6.7609	7.5859	6.7609	8.5115	7.5859
Sub2	2015-11-09	47	3	0.29	90	ul	8.19	5.3704	13.4898	9.5501	12.0228	8.5115	9.5501	6.0257	8.5115	6.7609	10.7154
Sub2	2015-11-09	47	3	0.29	90	ul	6.51	8.5115	13.4898	6.7609	7.5859	6.7609	8.5115	6.7609	7.5859	4.7864	5.3704
Sub2	2015-11-09	47	3	0.29	90	ul	7.16	6.7609	8.5115	6.7609	8.5115	6.7609	7.5859	6.7609	7.5859	6.7609	7.5859
Sub2	2015-11-09	47	3	0.29	90	ul	6.14	6.7609	10.7154	4.7864	6.0257	4.7864	7.5859	5.3704	6.7609	6.0257	6.7609
Sub2	2015-11-09	47	3	0.29	90	ul	6.38	6.7609	8.5115	5.3704	8.5115	6.7609	7.5859	5.3704	6.0257	5.3704	7.5859
Sub2	2015-11-18	47	3	0.29	90	ul	8.84	5.3704	6.7609	5.3704	6.0257	5.3704	9.5501	8.5115	10.7154	8.5115	12.0228
Sub2	2015-11-18	47	3	0.29	90	ul	5.91	3.3885	5.3704	4.2659	8.5115	6.0257	6.7609	4.7864	5.3704	4.7864	8.5115
Sub2	2015-11-18	47	3	0.29	90	ul	9.55	5.3704	6.7609	5.3704	15.1358	10.7154	12.0228	8.5115	10.7154	7.5859	8.5115
Sub2	2015-11-18	47	3	0.29	90	ul	9.19	6.7609	10.7154	8.5115	9.5501	7.5859	8.5115	6.7609	9.5501	8.5115	16.9827
Sub3	2015-11-10	47	3	0.29	90	dr	9.55	8.5115	10.7154	7.5859	10.7154	7.5859	10.7154	8.5115	10.7154	9.5501	10.7154
Sub3	2015-11-10	47	3	0.29	90	dr	8.04	8.5115	13.4898	7.5859	9.5501	7.5859	8.5115	7.5859	8.5115	7.5859	8.5115
Sub3	2015-11-10	47	3	0.29	90	dr	8.84	8.5115	10.7154	6.7609	7.5859	6.7609	9.5501	8.5115	12.0228	7.5859	9.5501
Sub3	2015-11-10	47	3	0.29	90	dr	7.73	6.7609	10.7154	8.5115	9.5501	6.7609	8.5115	6.7609	7.5859	6.7609	10.7154
Sub3	2015-11-10	47	3	0.29	90	dr	6.76	10.7154	13.4898	6.0257	7.5859	6.0257	7.5859	6.7609	7.5859	6.0257	6.7609
Sub3	2015-11-18	47	3	0.29	90	dr	8.84	8.5115	10.7154	7.5859	9.5501	8.5115	9.5501	7.5859	9.5501	8.5115	9.5501
Sub3	2015-11-18	47	3	0.29	90	dr	8.84	8.5115	10.7154	6.7609	7.5859	6.7609	9.5501	8.5115	10.7154	8.5115	9.5501
Sub3	2015-11-18	47	3	0.29	90	dr	6.76	2.138	6.7609	5.3704	6.0257	5.3704	6.7609	6.0257	8.5115	6.7609	7.5859
Sub3	2015-11-18	47	3	0.29	90	dr	6.14	6.7609	8.5115	6.7609	8.5115	6.0257	6.7609	6.0257	6.7609	4.7864	6.7609
Sub3	2015-11-18	47	3	0.29	90	dr	5.69	6.7609	8.5115	6.0257	6.7609	3.802	5.3704	4.2659	7.5859	6.7609	7.5859
Sub3	2015-11-18	47	3	0.29	90	dr	5.91	8.5115	10.7154	8.5115	9.5501	6.0257	6.7609	5.3704	6.7609	4.7864	6.0257
Sub4	2015-11-12	47	3	0.29	90	ul	3.39	4.7864	6.0257	4.7864	5.3704	3.02	3.3885	3.02	3.802	3.3885	3.802
Sub4	2015-11-12	47	3	0.29	90	ul	5.8	4.7864	6.0257	4.2659	6.0257	5.3704	6.7609	6.0257	6.7609	4.7864	5.3704
Sub4	2015-11-12	47	3	0.29	90	ul	5.91	7.5859	9.5501	7.5859	9.5501	7.5859	8.5115	5.3704	6.0257	3.802	5.3704
Sub4	2015-11-12	47	3	0.29	90	ul	5.17	6.0257	7.5859	4.7864	6.0257	4.7864	5.3704	4.7864	6.0257	4.7864	5.3704
Sub4	2015-11-12	47	3	0.29	90	ul	5.8	7.5859	12.0228	6.7609	7.5859	6.0257	6.7609	4.7864	7.5859	4.2659	6.0257
Sub4	2015-11-12	47	3	0.29	90	ul	4.97	4.7864	6.0257	4.2659	5.3704	4.2659	5.3704	4.7864	5.3704	4.7864	5.3704
Sub4	2015-11-20	47	3	0.29	90	ul	4.52	6.0257	7.5859	5.3704	6.0257	4.2659	4.7864	4.2659	4.7864	4.2659	4.7864
Sub4	2015-11-20	47	3	0.29	90	ul	4.7	6.0257	7.5859	4.7864	5.3704	4.7864	5.3704	4.2659	4.7864	4.2659	4.7864
Sub4	2015-11-20	47	3	0.29	90	ul	8.51	15.1358	7.5859	9.5501	6.7609	8.5115	6.7609	9.5501	8.5115	9.5501	8.5115
Sub4	2015-11-20	47	3	0.29	90	ul	8.35	12.0228	7.5859	10.7154	7.5859	9.5501	8.5115	9.5501	7.5859	8.5115	6.7609
Sub4	2015-11-20	47	3	0.29	90	ul	4.18	4.7864	6.0257	3.3885	4.7864	3.802	4.2659	3.802	4.2659	3.802	5.3704
Sub4	2015-11-20	47	3	0.29	90	ul	6.51	7.5859	9.5501	7.5859	8.5115	6.7609	7.5859	6.0257	7.5859	5.3704	6.0257
Sub5	2015-11-09	47	3	0.29	90	ul	8.35	13.4898	6.7609	8.5115	7.5859	8.5115	7.5859	9.5501	7.5859	9.5501	7.5859
Sub5	2015-11-09	47	3	0.29	90	ul	5.07	4.2659	6.7609	4.7864	5.3704	4.2659	4.7864	4.2659	6.0257	5.3704	6.0257
Sub5	2015-11-09	47	3	0.29	90	ul	4.97	4.2659	6.7609	5.3704	6.0257	3.802	5.3704	4.7864	5.3704	4.7864	6.0257
Sub5	2015-11-09	47	3	0.29	90	ul	5.58	5.3704	6.7609	5.3704	6.0257	5.3704	6.7609	5.3704	6.0257	4.7864	5.3704
Sub5	2015-11-09	47	3	0.29	90	ul	6.26	5.3704	13.4898	7.5859	8.5115	6.0257	6.7609	5.3704	6.7609	6.0257	6.7609
Sub5	2015-11-09	47	3	0.29	90	ul	6.51	8.5115	10.7154	5.3704	7.5859	6.7609	7.5859	6.0257	6.7609	5.3704	6.7609
Sub5	2015-11-19	47	3	0.29	90	ul	6.76	8.5115	13.4898	9.5501	10.7154	7.5859	8.5115	6.0257	6.7609	5.3704	6.7609
Sub5	2015-11-19	47	3	0.29	90	ul	5.58	5.3704	6.7609	5.3704	7.5859	6.0257	6.7609	6.0257	6.7609	3.802	4.7864
Sub5	2015-11-19	47	3	0.29	90	ul	7.88	6.7609	8.5115	6.7609	9.5501	7.5859	9.5501	7.5859	8.5115	6.7609	7.5859
Sub5	2015-11-19	47	3	0.29	90	ul	5.8	3.3885	4.2659	3.3885	8.5115	5.3704	6.0257	5.3704	6.7609	5.3704	6.0257
Sub5	2015-11-19	47	3	0.29	90	ul	6.89	6.7609	8.5115	5.3704	6.7609	6.0257	7.5859	6.0257	6.7609	6.0257	9.5501
Sub5	2015-11-19	47	3	0.29	90	ul	7.16	6.7609	8.5115	3.3885	4.7864	4.2659	8.5115	7.5859	12.0228	6.0257	6.7609
Sub6	2016-04-17	47	3	0.29	90	dr	3.08	13.4898	2.138	2.6916	2.3989	3.02	2.6916	4.2659	3.02	3.3885	2.3989
Sub6	2016-04-17	47	3	0.29	90	dr	6.38	6.7609	8.5115	6.7609	7.5859	6.7609	7.5859	6.0257	6.7609	5.3704	6.0257
Sub6	2016-04-17	47	3	0.29	90	dr	2.59	5.3704	8.5115	3.02	3.3885	2.3989	2.6916	1.9055	3.02	2.6916	3.02
Sub6	2016-04-17	47	3	0.29	90	dr	3.45	6.7609	8.5115	6.0257	6.7609	3.3885	3.802	3.02	3.802	3.02	3.802
Sub6	2016-04-17	47	3	0.29	90	dr	6.51	5.3704	10.7154	8.5115	9.5501	6.7609	9.5501	7.5859	8.5115	3.802	4.7864
Sub6	2016-04-17	47	3	0.29	90	dr	3.14	5.3704	6.7609	3.3885	3.802	3.3885	3.802	2.3989	3.3885	2.6916	3.3885
Sub6	2016-04-26	47	3	0.29	90	dr	2.96	3.3885	5.3704	3.02	3.3885	2.3989	2.6916	2.138	3.3885	3.02	4.7864
Sub6	2016-04-26	47	3	0.29	90	dr	2.14	5.3704	6.7609	3.02	3.3885	2.6916	3.02	2.138	2.3989	1.349	1.6983
Sub6	2016-04-26	47	3	0.29	90	dr	3.2	2.138	2.6916	2.138	3.3885	3.02	3.3885	3.02	3.3885	3.02	3.3885
Sub6	2016-04-26	47	3	0.29	90	dr	3.02	4.2659	5.3704	2.3989	2.6916	2.3989	3.02	2.3989	3.802	3.02	3.802
Sub6	2016-04-26	47	3	0.29	90	dr	3.59	2.6916	3.3885	2.6916	3.3885	2.6916	3.802	3.3885	3.802	3.3885	4.7864
Sub7	2016-04-20	47	3	0.67	90	ul	8.68	5.3704	10.7154	8.5115	10.7154	8.5115	9.5501	7.5859	8.5115	7.5859	10.7154
Sub7	2016-04-20	47	3	0.67	90	ul	8.19	13.4898	10.7154	13.4898	10.7154	12.0228	8.5115	9.5501	6.0257	7.5859	6.7609
Sub7	2016-04-20	47	3	0.67	90	ul	6.63	13.4898	10.7154	13.4898	7.5859	8.5115	6.0257	6.7609	6.0257	6.7609	6.0257
Sub7	2016-04-20	47	3	0.67	90	ul	6.26	8.5115	10.7154	8.5115	9.5501	6.7609	8.5115	6.0257	6.7609	4.7864	5.3704
Sub7	2016-04-20	47	3	0.67	90	ul	3.73	6.7609	8.5115	3.802	4.2659	3.802	4.2659	3.3885	3.802	3.02	4.2659
Sub7	2016-04-20	47	3	0.67	90	ul	5.37	6.7609	8.5115	4.7864	6.7609	5.3704	6.7609	4.7864	5.3704	4.7864	5.3704
Sub7	2016-04-25	47	3	0.67	90	ul	9.02	8.5115	10.7154	8.5115	13.4898	10.7154	12.0228	6.7609	8.5115	7.5859	9.5501
Sub7	2016-04-25	47	3	0.67	90	ul	5.47	3.3885	8.5115	4.7864	6.0257	5.3704	6.0257	4.2659	6.0257	5.3704	6.0257
Sub7	2016-04-25	47	3	0.67	90	ul	4.79	5.3704	8.5115	4.2659	5.3704	4.7864	6.0257	5.3704	6.0257	3.3885	3.802
Sub7	2016-04-25	47	3	0.67	90	ul	7.16	8.5115	10.7154	6.0257	7.5859	5.3704	7.5859	6.7609	7.5859	6.7609	9.5501
Sub7	2016-04-25	47	3	0.67	90	ul	6.03	5.3704	8.5115	5.3704	7.5859	4.7864	6.7609	6.0257	8.5115	4.7864	6.0257
Sub8	2016-04-20	47	3	0.29	90	dr	6.76	7.5859	9.5501	6.7609	8.5115	6.7609	7.5859	6.0257	7.5859	6.0257	6.7609
Sub8	2016-04-20	47	3	0.29	90	dr	8.35	7.5859	9.5501	7.5859	10.7154	8.5115	9.5501	7.5859	8.5115	7.5859	8.5115
Sub8	2016-04-20	47	3	0.29	90	dr	6.14	6.0257	7.5859	4.7864	6.0257	4.7864	5.3704	4.7864	7.5859	6.7609	8.5115
Sub8	2016-04-20	47	3	0.29	90	dr	4.35	7.5859	9.5501	7.5859	8.5115	3.3885	4.7864	4.2659	4.7864	4.2659	4.7864
Sub8	2016-04-20	47	3	0.29	90	dr	3.2	3.802	4.7864	2.6916	3.802	3.02	3.3885	2.6916	3.3885	3.02	3.802
Sub8	2016-04-20	47	3	0.67	90	dr	6.26	12.0228	7.5859	9.5501	7.5859	8.5115	6.0257	6.7609	5.3704	6.0257	5.3704
Sub8	2016-04-26	47	3	0.29	90	dr	4.27	3.802	4.7864	3.802	4.2659	3.802	4.7864	3.802	4.7864	3.802	4.7864
Sub8	2016-04-26	47	3	0.29	90	dr	7.16	12.0228	7.5859	9.5501	8.5115	9.5501	8.5115	9.5501	5.3704	6.0257	5.3704
Sub8	2016-04-26	47	3	0.29	90	dr	4.61	12.0228	6.0257	7.5859	6.7609	8.5115	6.0257	8.5115	2.6916	3.02	2.6916
Sub8	2016-04-26	47	3	0.29	90	dr	3.8	6.0257	7.5859	6.0257	6.7609	3.3885	4.2659	3.802	4.2659	3.3885	3.802
Sub8	2016-04-26	47	3	0.29	90	dr	6.38	7.5859	9.5501	6.7609	8.5115	5.3704	6.0257	5.3704	8.5115	6.0257	7.5859
